# Supplementary material for: Time Series Expression Analyses Using RNA-seq: A Statistical Approach
Source: Biomed Res Int. 2013 Mar 24;2013:203681. doi: 10.1155/2013/203681 (PMC3622290; doi:10.1155/2013/203681)
Supplement: Supplementary file 1 — Supplementary Table 1: Temporally differentially expressed gene sets detected by statistical evolutionary trajectory index (SETI) where the Benjamini-Hochberg FDR is controlled at < 0.05 in maize data Supplementary Table 2: Temporally differentially expressed gene sets detected by statistical evolutionary trajectory index (SETI) where the Benjamini-Hochberg FDR is controlled at < 0.05 in zebrafish data Supplementary Table 3: Temporally differentially expressed gene sets detected by Poisson AR(1) model in maize data Supplementary Table 4: Temporally differentially expressed gene sets detected by Poisson AR(1) model in zebrafish data [file 203681.f1.zip]

Archive with 5 entries (4 files):
- SUPPLEMENTARY-DATA-JBB/
- SUPPLEMENTARY-DATA-JBB/SUPPLE-TABLE-1.xlsx
- SUPPLEMENTARY-DATA-JBB/SUPPLE-TABLE-2.xlsx
- SUPPLEMENTARY-DATA-JBB/SUPPLE-TABLE-3.xlsx
- SUPPLEMENTARY-DATA-JBB/SUPPLE-TABLE-4.xlsx
