# Supplementary material for: Time Series Expression Analyses Using RNA-seq: A Statistical Approach
Source: Biomed Res Int. 2013 Mar 24;2013:203681. doi: 10.1155/2013/203681 (PMC3622290; doi:10.1155/2013/203681)
Supplement: Supplementary file 1 — Supplementary Table 1: Temporally differentially expressed gene sets detected by statistical evolutionary trajectory index (SETI) where the Benjamini-Hochberg FDR is controlled at < 0.05 in maize data Supplementary Table 2: Temporally differentially expressed gene sets detected by statistical evolutionary trajectory index (SETI) where the Benjamini-Hochberg FDR is controlled at < 0.05 in zebrafish data Supplementary Table 3: Temporally differentially expressed gene sets detected by Poisson AR(1) model in maize data Supplementary Table 4: Temporally differentially expressed gene sets detected by Poisson AR(1) model in zebrafish data [file 203681.f1.zip › SUPPLEMENTARY-DATA-JBB/SUPPLE-TABLE-1.xlsx]

## Sheet: Sheet1
gene_anno+1:5274	chrName	geneName	geneID	SumOfExon	base	1cm	4cm	tip	TRJ_IND	rawp-bsp	bonp-bsp	bhp-bsp
30863	chr2	GRMZM2G177575	GRMZM2G177575	1945	46	16	46	78	1.25	0	0	0
23890	chr1	GRMZM5G872264	GRMZM5G872264	2778	2	2	12	46	1.25	0	0	0
17011	chr1	GRMZM2G353497	GRMZM2G353497	1612	29	33	30	67	1.25	0	0	0
51687	chr4	GRMZM2G033855	GRMZM2G033855	555	10	17	39	27	1.25	0	0	0
104345	chr9	GRMZM2G113200	GRMZM2G113200	1333	3632	1573	2848	3605	1.25	0	0	0
64471	chr5	GRMZM2G053744	GRMZM2G053744	1458	46	26	57	89	1.25	0	0	0
65089	chr5	GRMZM2G078324	GRMZM2G078324	1052	1645	5287	4295	4916	1.25	0	0	0
15486	chr1	GRMZM2G159477	GRMZM2G159477	1351	38	49	77	55	1.25	0	0	0
94144	chr8	GRMZM2G063129	GRMZM2G063129	1220	3	5	11	8	1.25	0	0	0
17386	chr1	GRMZM2G382569	GRMZM2G382569	1873	7	17	98	18	1.25	0	0	0
69202	chr5	GRMZM2G433041	GRMZM2G433041	584	5	5	3	14	1.25	0	0	0
77383	chr6	GRMZM2G137930	GRMZM2G137930	1992	319	619	686	874	1.25	0	0	0
13270	chr1	GRMZM2G094240	GRMZM2G094240	479	2	10	4	3	1.25	0	0	0
40001	chr3	GRMZM2G035276	GRMZM2G035276	2558	2	10	4	3	1.25	0	0	0
101113	chr8	GRMZM5G874500	GRMZM5G874500	2446	188	265	428	402	1.25	0	0	0
27026	chr2	GRMZM2G039969	GRMZM2G039969	1257	11	66	48	59	1.25	0	0	0
77840	chr6	GRMZM2G160685	GRMZM2G160685	1599	2	5	17	17	1.25	0	0	0
3000	chr10	GRMZM2G116704	GRMZM2G116704	478	9	5	2	3	1.25	0	0	0
65053	chr5	GRMZM2G076963	GRMZM2G076963	199	9	5	2	3	1.25	0	0	0
66364	chr5	GRMZM2G126447	GRMZM2G126447	3234	324	302	536	809	1.25	0	0	0
72799	chr5	GRMZM5G829896	GRMZM5G829896	1479	52	97	297	127	1.25	0	0	0
84005	chr7	GRMZM2G001956	GRMZM2G001956	1860	369	1034	898	1043	1.25	0	0	0
13781	chr1	GRMZM2G109885	GRMZM2G109885	2225	42	69	163	91	1.25	0	0	0
73271	chr5	GRMZM5G868661	GRMZM5G868661	1935	26	63	76	109	1.25	0	0	0
15796	chr1	GRMZM2G169451	GRMZM2G169451	910	150	219	354	382	1.25	0	0	0
56448	chr4	GRMZM2G375733	GRMZM2G375733	640	4	2	7	15	1.25	0	0	0
104477	chr9	GRMZM2G119067	GRMZM2G119067	1039	2	2	14	60	1.25	0	0	0
77076	chr6	GRMZM2G124225	GRMZM2G124225	1714	4	2	22	111	1.25	0	0	0
57038	chr4	GRMZM2G431114	GRMZM2G431114	1779	3	10	5	4	1.25	0	0	0
96823	chr8	GRMZM2G334457	GRMZM2G334457	3958	152	284	628	712	1.25	0	0	0
85687	chr7	GRMZM2G093766	GRMZM2G093766	858	6	19	13	13	1.25	0	0	0
35155	chr2	GRMZM2G552145	GRMZM2G552145	284	7	12	4	2	1.25001	0	0	0
63413	chr5	GRMZM2G008715	GRMZM2G008715	983	68	22	38	43	1.25001	0	0	0
51670	chr4	GRMZM2G033022	GRMZM2G033022	2130	121	84	150	211	1.25001	0	0	0
77653	chr6	GRMZM2G152041	GRMZM2G152041	1124	2039	5005	2265	1557	1.25001	0	0	0
72504	chr5	GRMZM5G803452	GRMZM5G803452	279	164	177	156	312	1.25001	0	0	0
86976	chr7	GRMZM2G165681	GRMZM2G165681	1566	155	95	161	211	1.25001	0	0	0
2314	chr10	GRMZM2G069382	GRMZM2G069382	4659	9	28	131	122	1.25001	0	0	0
10046	chr1	GRMZM2G001850	GRMZM2G001850	862	20	34	101	33	1.25001	0	0	0
42254	chr3	GRMZM2G130348	GRMZM2G130348	2606	445	924	2216	3007	1.25001	0	0	0
67269	chr5	GRMZM2G161668	GRMZM2G161668	2137	88	164	210	295	1.25001	0	0	0
52668	chr4	GRMZM2G072119	GRMZM2G072119	520	239	28	131	241	1.25001	0	0	0
50995	chr4	GRMZM2G006363	GRMZM2G006363	2078	2455	462	2072	4164	1.25001	0	0	0
101251	chr8	GRMZM5G889321	GRMZM5G889321	2885	109	158	333	160	1.25001	0	0	0
48987	chr3	GRMZM5G874348	GRMZM5G874348	519	3	13	86	107	1.25001	0	0	0
40928	chr3	GRMZM2G071705	GRMZM2G071705	2411	9	4	35	144	1.25001	0	0	0
104340	chr9	GRMZM2G112951	GRMZM2G112951	1513	22	7	40	110	1.25001	0	0	0
12336	chr1	GRMZM2G068158	GRMZM2G068158	2810	10	23	118	494	1.25001	0	0	0
91175	chr7	GRMZM5G836845	GRMZM5G836845	1055	3	2	14	54	1.25001	0	0	0
43447	chr3	GRMZM2G305060	GRMZM2G305060	3182	14	21	42	27	1.25001	0	0	0
54878	chr4	GRMZM2G155363	GRMZM2G155363	1591	7	3	4	4	1.25001	0	0	0
94217	chr8	GRMZM2G067508	GRMZM2G067508	1556	7	6	16	32	1.25001	0	0	0
39869	chr3	GRMZM2G031416	GRMZM2G031416	968	4	3	9	19	1.25001	0	0	0
76224	chr6	GRMZM2G078757	GRMZM2G078757	1554	8	12	20	22	1.25001	0	0	0
33075	chr2	GRMZM2G474468	GRMZM2G474468	440	124	89	168	7	1.25001	0	0	0
39466	chr3	GRMZM2G014805	GRMZM2G014805	4262	335	331	471	611	1.25001	0	0	0
42288	chr3	GRMZM2G132069	GRMZM2G132069	2109	296	424	983	2017	1.25001	0	0	0
84901	chr7	GRMZM2G051721	GRMZM2G051721	714	197	342	126	68	1.25001	0	0	0
4985	chr10	GRMZM2G431157	GRMZM2G431157	3888	53	64	134	244	1.25001	0	0	0
76326	chr6	GRMZM2G085042	GRMZM2G085042	1599	17	8	24	45	1.25001	0	0	0
67727	chr5	GRMZM2G180422	GRMZM2G180422	2318	59	93	233	519	1.25001	0	0	0
65082	chr5	GRMZM2G078178	GRMZM2G078178	1904	3	2	15	62	1.25001	0	0	0
41470	chr3	GRMZM2G094080	GRMZM2G094080	592	9	7	4	8	1.25001	0	0	0
103970	chr9	GRMZM2G094497	GRMZM2G094497	2378	1450	1140	2385	3892	1.25001	0	0	0
77099	chr6	GRMZM2G125131	GRMZM2G125131	876	3	7	31	11	1.25001	0	0	0
95480	chr8	GRMZM2G129162	GRMZM2G129162	2310	34	15	27	34	1.25002	0	0	0
56819	chr4	RPL39	GRMZM2G411764	613	543	700	326	195	1.25002	0	0	0
84122	chr7	GRMZM2G008687	GRMZM2G008687	1734	1231	307	698	905	1.25002	0	0	0
38343	chr3	AC203218.3_FG001	AC203218.3_FG001	267	226	167	78	236	1.25002	0	0	0
29944	chr2	GRMZM2G146267	GRMZM2G146267	4821	369	212	453	693	1.25002	0	0	0
31579	chr2	GRMZM2G348453	GRMZM2G348453	3008	2	6	24	31	1.25002	0	0	0
2082	chr10	GRMZM2G054418	GRMZM2G054418	3352	168	131	447	1047	1.25002	0	0	0
75858	chr6	SODA.4	GRMZM2G059991	1110	734	320	556	679	1.25002	0	0	0
31699	chr2	GRMZM2G358139	GRMZM2G358139	1029	16	3	10	16	1.25002	0	0	0
28923	chr2	GRMZM2G106099	GRMZM2G106099	1104	26	18	40	66	1.25003	0	0	0
26844	chr2	GRMZM2G033093	GRMZM2G033093	2364	32	25	59	105	1.25003	0	0	0
18549	chr1	GRMZM2G458782	GRMZM2G458782	603	5	7	11	11	1.25003	0	0	0
77444	chr6	GRMZM2G141208	GRMZM2G141208	2205	5	7	11	11	1.25003	0	0	0
54341	chr4	GRMZM2G134959	GRMZM2G134959	974	8	12	34	8	1.25003	0	0	0
64755	chr5	GRMZM2G065669	GRMZM2G065669	1588	81	105	197	87	1.25003	0	0	0
101057	chr8	GRMZM5G869161	GRMZM5G869161	513	19	3	15	31	1.25003	0	0	0
43209	chr3	GRMZM2G171677	GRMZM2G171677	2174	22	85	82	111	1.25003	0	0	0
56391	chr4	GRMZM2G370777	GRMZM2G370777	2179	113	54	251	652	1.25003	0	0	0
45016	chr3	GRMZM2G449147	GRMZM2G449147	1533	439	1137	1320	1864	1.25003	0	0	0
105940	chr9	GRMZM2G350319	GRMZM2G350319	2845	30	62	206	107	1.25003	0	0	0
10782	chr1	GRMZM2G022907	GRMZM2G022907	415	33	74	34	23	1.25003	0	0	0
96241	chr8	GRMZM2G167554	GRMZM2G167554	1937	409	204	272	282	1.25003	0	0	0
31564	chr2	GRMZM2G347743	GRMZM2G347743	2500	29	48	151	403	1.25004	0	0	0
95368	chr8	GRMZM2G123572	GRMZM2G123572	727	3	6	19	10	1.25004	0	0	0
3031	chr10	GRMZM2G119370	GRMZM2G119370	755	85	30	107	211	1.25004	0	0	0
63947	chr5	GRMZM2G029810	GRMZM2G029810	1967	125	28	59	70	1.25004	0	0	0
1884	chr10	GRMZM2G040803	GRMZM2G040803	1675	134	312	278	313	1.25004	0	0	0
69344	chr5	GRMZM2G452633	GRMZM2G452633	1967	3	6	9	44	1.25004	0	0	0
31238	chr2	GRMZM2G321404	GRMZM2G321404	2219	184	184	251	102	1.25004	0	0	0
3814	chr10	GRMZM2G169005	GRMZM2G169005	1248	305	868	3310	4034	1.25004	0	0	0
88225	chr7	GRMZM2G422303	GRMZM2G422303	2634	9	5	11	17	1.25004	0	0	0
28612	chr2	GRMZM2G094662	GRMZM2G094662	1909	85	118	160	239	1.25004	0	0	0
95517	chr8	GRMZM2G131334	GRMZM2G131334	3403	8	14	71	274	1.25004	0	0	0
2315	chr10	GRMZM2G069389	GRMZM2G069389	1545	2	8	3	2	1.25004	0	0	0
47259	chr3	GRMZM2G560350	GRMZM2G560350	283	2	8	3	2	1.25004	0	0	0
28266	chr2	GRMZM2G082249	GRMZM2G082249	1839	2	7	8	12	1.25005	0	0	0
28346	chr2	GRMZM2G084928	GRMZM2G084928	2520	345	321	549	803	1.25005	0	0	0
52056	chr4	GRMZM2G048866	GRMZM2G048866	1197	3	2	7	16	1.25005	0	0	0
107108	chr9	GRMZM2G490809	GRMZM2G490809	382	4	15	5	3	1.25005	0	0	0
13698	chr1	GRMZM2G108003	GRMZM2G108003	1193	339	32	93	112	1.25005	0	0	0
31429	chr2	GAPA	GRMZM2G337113	1776	63947	33207	88697	155502	1.25005	0	0	0
52958	chr4	GRMZM2G082544	GRMZM2G082544	1624	60	79	86	205	1.25005	0	0	0
55015	chr4	GRMZM2G160143	GRMZM2G160143	1204	31965	23673	49760	79978	1.25005	0	0	0
88453	chr7	GRMZM2G449709	GRMZM2G449709	1253	91	503	215	171	1.25005	0	0	0
10665	chr1	ZBP14	GRMZM2G018728	1012	859	341	643	812	1.25005	0	0	0
104316	chr9	GRMZM2G110862	GRMZM2G110862	2308	28	36	41	77	1.25005	0	0	0
72538	chr5	GRMZM5G806651	GRMZM5G806651	135	31	44	26	19	1.25005	0	0	0
52330	chr4	GRMZM2G059381	GRMZM2G059381	2702	77	143	274	465	1.25005	0	0	0
42985	chr3	GRMZM2G162274	GRMZM2G162274	1535	5	8	17	12	1.25005	0	0	0
67332	chr5	GRMZM2G164242	GRMZM2G164242	2380	6	4	11	21	1.25005	0	0	0
104735	chr9	GRMZM2G135960	GRMZM2G135960	1040	2	2	11	39	1.25005	0	0	0
64232	chr5	GRMZM2G042208	GRMZM2G042208	1420	32	46	75	75	1.25006	0	0	0
72906	chr5	GRMZM5G838899	GRMZM5G838899	297	55	50	57	27	1.25006	0	0	0
2331	chr10	GRMZM2G070550	GRMZM2G070550	246	3	5	12	7	1.25006	0	0	0
106472	chr9	GRMZM2G417258	GRMZM2G417258	3704	53	66	123	48	1.25006	0	0	0
105363	chr9	GRMZM2G171428	GRMZM2G171428	2427	62	105	187	274	1.25006	0	0	0
31849	chr2	GRMZM2G370407	GRMZM2G370407	693	108	149	92	69	1.25006	0	0	0
54773	chr4	GRMZM2G151639	GRMZM2G151639	1479	3	5	6	28	1.25006	0	0	0
68006	chr5	GRMZM2G325038	GRMZM2G325038	815	6	5	3	7	1.25006	0	0	0
67702	chr5	GRMZM2G179292	GRMZM2G179292	1489	893	3119	1396	1027	1.25006	0	0	0
82424	chr6	GRMZM5G846339	GRMZM5G846339	1970	129	49	150	268	1.25006	0	0	0
22409	chr1	GRMZM2G584263	GRMZM2G584263	592	53	12	17	15	1.25006	0	0	0
42670	chr3	GRMZM2G148115	GRMZM2G148115	1397	175	88	170	232	1.25006	0	0	0
103170	chr9	GRMZM2G049076	GRMZM2G049076	4320	132	233	544	430	1.25006	0	0	0
63445	chr5	GRMZM2G010075	GRMZM2G010075	2792	54	97	204	233	1.25007	0	0	0
31604	chr2	GRMZM2G350391	GRMZM2G350391	4286	17	51	202	273	1.25007	0	0	0
48845	chr3	GRMZM5G861300	GRMZM5G861300	2440	180	455	354	366	1.25007	0	0	0
4959	chr10	GRMZM2G427087	GRMZM2G427087	1363	13	20	40	29	1.25007	0	0	0
85874	chr7	GRMZM2G104231	GRMZM2G104231	2156	2	3	22	107	1.25007	0	0	0
104219	chr9	GRMZM2G107886	GRMZM2G107886	1847	199	56	241	512	1.25007	0	0	0
50949	chr4	GRMZM2G004835	GRMZM2G004835	2044	231	147	359	619	1.25008	0	0	0
109804	chr9	GRMZM5G876881	GRMZM5G876881	366	445	878	47	6	1.25008	0	0	0
29230	chr2	GRMZM2G117993	GRMZM2G117993	920	92	290	263	322	1.25008	0	0	0
85534	chr7	GRMZM2G083932	GRMZM2G083932	1300	29	20	37	53	1.25008	0	0	0
85885	chr7	GRMZM2G104608	GRMZM2G104608	2615	1821	1485	2522	3541	1.25008	0	0	0
60984	chr4	GRMZM5G821128	GRMZM5G821128	920	8	25	31	48	1.25009	0	0	0
53876	chr4	GRMZM2G118385	GRMZM2G118385	2539	53	49	102	172	1.25009	0	0	0
94174	chr8	GRMZM2G064767	GRMZM2G064767	2190	25	73	58	63	1.25009	0	0	0
53175	chr4	GRMZM2G091503	GRMZM2G091503	1906	54	25	77	145	1.25009	0	0	0
52069	chr4	GRMZM2G049424	GRMZM2G049424	1997	2	2	20	110	1.25009	0	0	0
41027	chr3	GRMZM2G076688	GRMZM2G076688	1538	25	11	32	57	1.25009	0	0	0
94625	chr8	GRMZM2G086964	GRMZM2G086964	1708	216	89	243	406	1.25009	0	0	0
53522	chr4	GRMZM2G105176	GRMZM2G105176	1452	2	4	15	5	1.25009	0	0	0
39255	chr3	GRMZM2G005205	GRMZM2G005205	970	5	9	18	24	1.25009	0	0	0
52433	chr4	GRMZM2G063316	GRMZM2G063316	2607	176	255	319	736	1.25009	0	0	0
66518	chr5	GRMZM2G131822	GRMZM2G131822	2076	2	11	10	14	1.25009	0	0	0
23353	chr1	GRMZM5G833641	GRMZM5G833641	294	55	10	15	13	1.2501	0	0	0
30248	chr2	GRMZM2G155877	GRMZM2G155877	821	184	31	63	67	1.2501	0	0	0
39394	chr3	GRMZM2G011592	GRMZM2G011592	2639	1599	3160	8803	6550	1.2501	0	0	0
55007	chr4	GRMZM2G159700	GRMZM2G159700	936	3	8	7	8	1.2501	0	0	0
14815	chr1	GRMZM2G139360	GRMZM2G139360	2500	31	18	44	74	1.2501	0	0	0
84886	chr7	GRMZM2G050501	GRMZM2G050501	1968	13	25	79	37	1.2501	0	0	0
61772	chr4	GRMZM5G897114	GRMZM5G897114	276	3	7	21	24	1.2501	0	0	0
2463	chr10	GRMZM2G079409	GRMZM2G079409	1537	3	18	82	399	1.25011	0	0	0
85110	chr7	GRMZM2G061884	GRMZM2G061884	969	44	154	56	35	1.25011	0	0	0
93578	chr8	GRMZM2G034019	GRMZM2G034019	2306	58	115	265	343	1.25011	0	0	0
63819	chr5	GRMZM2G024948	GRMZM2G024948	2024	2	5	18	16	1.25011	0	0	0
43592	chr3	GRMZM2G316163	GRMZM2G316163	1809	9	6	3	5	1.25011	0	0	0
86456	chr7	GRMZM2G136748	GRMZM2G136748	442	9	6	3	5	1.25011	0	0	0
51171	chr4	GRMZM2G012663	GRMZM2G012663	945	3	10	8	9	1.25011	0	0	0
23462	chr1	GRMZM5G840939	GRMZM5G840939	1993	8	4	57	339	1.25011	0	0	0
18520	chr1	GRMZM2G457147	GRMZM2G457147	2248	3	20	33	76	1.25011	0	0	0
56411	chr4	GRMZM2G372633	GRMZM2G372633	731	231	377	90	34	1.25012	0	0	0
67625	chr5	gpc4	GRMZM2G176307	2051	74	16	132	421	1.25012	0	0	0
11150	chr1	GRMZM2G032409	GRMZM2G032409	2211	48	69	108	122	1.25012	0	0	0
31111	chr2	GRMZM2G311752	GRMZM2G311752	216	75	27	5	15	1.25012	0	0	0
16012	chr1	GRMZM2G176144	GRMZM2G176144	1739	22	60	59	74	1.25012	0	0	0
56343	chr4	GRMZM2G366659	GRMZM2G366659	3059	11	9	24	47	1.25012	0	0	0
88516	chr7	GRMZM2G458519	GRMZM2G458519	558	8	5	4	3	1.25013	0	0	0
8739	chr1	AC198418.3_FG005	AC198418.3_FG005	2782	1235	2750	2474	2762	1.25013	0	0	0
61390	chr4	GRMZM5G860542	GRMZM5G860542	423	13	9	5	7	1.25013	0	0	0
62499	chr5	AC205703.4_FG002	AC205703.4_FG002	1979	301	39	152	243	1.25013	0	0	0
64676	chr5	GRMZM2G062885	GRMZM2G062885	2537	171	153	300	479	1.25014	0	0	0
3716	chr10	GRMZM2G159393	GRMZM2G159393	1951	3	2	4	6	1.25014	0	0	0
13195	chr1	GRMZM2G092569	GRMZM2G092569	613	3	2	4	6	1.25014	0	0	0
15041	chr1	GRMZM2G147004	GRMZM2G147004	1089	3	2	4	6	1.25014	0	0	0
15043	chr1	GRMZM2G147170	GRMZM2G147170	378	3	2	4	6	1.25014	0	0	0
20841	chr1	GRMZM2G538704	GRMZM2G538704	89	3	2	4	6	1.25014	0	0	0
25283	chr2	AC207196.3_FG002	AC207196.3_FG002	552	3	2	4	6	1.25014	0	0	0
29000	chr2	GRMZM2G108875	GRMZM2G108875	1579	3	2	4	6	1.25014	0	0	0
29767	chr2	GRMZM2G138858	GRMZM2G138858	455	3	2	4	6	1.25014	0	0	0
30859	chr2	GRMZM2G177485	GRMZM2G177485	540	3	2	4	6	1.25014	0	0	0
31347	chr2	GRMZM2G329222	GRMZM2G329222	924	3	2	4	6	1.25014	0	0	0
32330	chr2	GRMZM2G410350	GRMZM2G410350	1140	3	2	4	6	1.25014	0	0	0
32697	chr2	GRMZM2G443105	GRMZM2G443105	2054	3	2	4	6	1.25014	0	0	0
33591	chr2	GRMZM2G497438	GRMZM2G497438	1275	3	2	4	6	1.25014	0	0	0
39204	chr3	GRMZM2G003354	GRMZM2G003354	2893	3	2	4	6	1.25014	0	0	0
59545	chr4	GRMZM2G551787	GRMZM2G551787	178	3	2	4	6	1.25014	0	0	0
60757	chr4	GRMZM5G800154	GRMZM5G800154	726	3	2	4	6	1.25014	0	0	0
61063	chr4	GRMZM5G828945	GRMZM5G828945	1119	3	2	4	6	1.25014	0	0	0
67824	chr5	TIP3-1	GRMZM2G305446	825	3	2	4	6	1.25014	0	0	0
68289	chr5	GRMZM2G353478	GRMZM2G353478	1313	3	2	4	6	1.25014	0	0	0
76756	chr6	GRMZM2G106530	GRMZM2G106530	662	3	2	4	6	1.25014	0	0	0
76894	chr6	GRMZM2G114560	GRMZM2G114560	583	3	2	4	6	1.25014	0	0	0
77484	chr6	GRMZM2G142734	GRMZM2G142734	637	3	2	4	6	1.25014	0	0	0
102451	chr9	GRMZM2G006714	GRMZM2G006714	2159	3	2	4	6	1.25014	0	0	0
56738	chr4	GRMZM2G402453	GRMZM2G402453	1906	562	779	412	274	1.25014	0	0	0
28169	chr2	GRMZM2G079236	GRMZM2G079236	3033	300	217	385	540	1.25014	0	0	0
87415	chr7	GRMZM2G320248	GRMZM2G320248	1022	19	6	13	17	1.25014	0	0	0
14609	chr1	GRMZM2G132748	GRMZM2G132748	657	493	324	195	170	1.25014	0	0	0
53865	chr4	GRMZM2G117989	GRMZM2G117989	1084	6	2	4	5	1.25015	0	0	0
78247	chr6	GRMZM2G300366	GRMZM2G300366	365	3	2	8	20	1.25015	0	0	0
93957	chr8	GRMZM2G053952	GRMZM2G053952	917	6	2	4	5	1.25015	0	0	0
94425	chr8	GRMZM2G077546	GRMZM2G077546	2216	542	122	255	297	1.25015	0	0	0
30689	chr2	GRMZM2G172330	GRMZM2G172330	2774	36	28	81	166	1.25015	0	0	0
18496	chr1	RPS28	GRMZM2G455828	1967	1013	1797	826	523	1.25015	0	0	0
18559	chr1	GRMZM2G459391	GRMZM2G459391	1904	2784	4219	2046	1300	1.25015	0	0	0
101651	chr9	AC197717.3_FG002	AC197717.3_FG002	1182	32	77	78	97	1.25015	0	0	0
48044	chr3	GRMZM2G701669	GRMZM2G701669	586	11	17	40	19	1.25016	0	0	0
18445	chr1	GRMZM2G453001	GRMZM2G453001	2751	6	11	24	27	1.25016	0	0	0
23441	chr1	GRMZM5G839017	GRMZM5G839017	1776	7	9	9	26	1.25016	0	0	0
39586	chr3	GRMZM2G019721	GRMZM2G019721	1202	77	32	74	109	1.25016	0	0	0
18097	chr1	GRMZM2G430455	GRMZM2G430455	1165	5	10	39	12	1.25016	0	0	0
28015	chr2	GRMZM2G074238	GRMZM2G074238	1884	338	543	1351	637	1.25016	0	0	0
26334	chr2	GRMZM2G014646	GRMZM2G014646	1022	3	3	6	10	1.25016	0	0	0
97649	chr8	GRMZM2G429057	GRMZM2G429057	2630	3	3	6	10	1.25016	0	0	0
3227	chr10	GRMZM2G130304	GRMZM2G130304	1345	4	9	7	7	1.25016	0	0	0
77466	chr6	GRMZM2G141925	GRMZM2G141925	1527	24	35	61	54	1.25017	0	0	0
103065	chr9	GRMZM2G041831	GRMZM2G041831	3577	958	339	693	893	1.25017	0	0	0
106411	chr9	GRMZM2G409101	GRMZM2G409101	569	7	3	6	8	1.25017	0	0	0
42476	chr3	GRMZM2G139688	GRMZM2G139688	2472	30	15	44	81	1.25017	0	0	0
34807	chr2	GRMZM2G538834	GRMZM2G538834	115	98	41	10	24	1.25018	0	0	0
78002	chr6	GRMZM2G168909	GRMZM2G168909	3866	302	371	228	165	1.25018	0	0	0
33072	chr2	GRMZM2G474451	GRMZM2G474451	2310	80	70	33	18	1.25018	0	0	0
20559	chr1	GRMZM2G530099	GRMZM2G530099	728	34	9	13	12	1.25019	0	0	0
77699	chr6	GRMZM2G154595	GRMZM2G154595	1648	3989	813	2099	2773	1.25019	0	0	0
104478	chr9	GRMZM2G119079	GRMZM2G119079	1907	731	630	955	1247	1.2502	0	0	0
30663	chr2	GRMZM2G171561	GRMZM2G171561	1346	13	8	23	44	1.2502	0	0	0
104547	chr9	GRMZM2G124288	GRMZM2G124288	2500	76	179	218	310	1.25021	0	0	0
52788	chr4	GRMZM2G075942	GRMZM2G075942	2145	58	46	84	123	1.25021	0	0	0
27111	chr2	GRMZM2G042712	GRMZM2G042712	1495	30	34	68	117	1.25022	0	0	0
7727	chr10	GRMZM5G868191	GRMZM5G868191	147	10	6	11	15	1.25022	0	0	0
16913	chr1	GRMZM2G347056	GRMZM2G347056	2375	108	51	266	734	1.25022	0	0	0
87068	chr7	GRMZM2G171093	GRMZM2G171093	814	12	7	2	12	1.25022	0	0	0
72478	chr5	GRMZM5G801625	GRMZM5G801625	733	12	9	5	10	1.25022	0	0	0
64643	chr5	GRMZM2G060940	GRMZM2G060940	1415	53	97	298	130	1.25023	0	0	0
104724	chr9	GRMZM2G135236	GRMZM2G135236	4062	3	4	26	111	1.25023	0	0	0
10847	chr1	GRMZM2G024324	GRMZM2G024324	881	18	11	30	55	1.25023	0	0	0
85489	chr7	GRMZM2G081857	GRMZM2G081857	3631	10	34	67	150	1.25023	0	0	0
82307	chr6	GRMZM5G835587	GRMZM5G835587	610	44	21	8	8	1.25025	0	0	0
39563	chr3	GRMZM2G018869	GRMZM2G018869	1957	7	11	19	23	1.25025	0	0	0
57199	chr4	GRMZM2G448282	GRMZM2G448282	1969	2	12	13	21	1.25025	0	0	0
101068	chr8	GRMZM5G870046	GRMZM5G870046	1263	16	23	37	39	1.25025	0	0	0
95871	chr8	GRMZM2G148904	GRMZM2G148904	1282	31	81	282	334	1.25025	0	0	0
78878	chr6	H3C2	GRMZM2G376957	1990	2	15	15	24	1.25025	0	0	0
12508	chr1	GRMZM2G072814	GRMZM2G072814	895	58	128	63	44	1.25026	0	0	0
54725	chr4	GRMZM2G149422	GRMZM2G149422	1554	39	23	78	166	1.25026	0	0	0
66552	chr5	GRMZM2G133262	GRMZM2G133262	2625	4	8	28	12	1.25026	0	0	0
34808	chr2	GRMZM2G538836	GRMZM2G538836	115	111	46	13	19	1.25026	0	0	0
18699	chr1	GRMZM2G469466	GRMZM2G469466	1390	23	11	47	112	1.25027	0	0	0
102835	chr9	GRMZM2G029407	GRMZM2G029407	2361	14	35	54	664	1.25028	0	0	0
12297	chr1	GRMZM2G067028	GRMZM2G067028	1091	1646	237	816	1204	1.25028	0	0	0
69201	chr5	GRMZM2G433025	GRMZM2G433025	675	1270	1356	1176	2495	1.25028	0	0	0
103594	chr9	GRMZM2G072573	GRMZM2G072573	4293	18	20	54	115	1.25029	0	0	0
86629	chr7	GRMZM2G145063	GRMZM2G145063	2958	79	54	118	189	1.25029	0	0	0
10349	chr1	Vp8	GRMZM2G010353	2220	23	8	19	27	1.25029	0	0	0
12666	chr1	GRMZM2G077079	GRMZM2G077079	2700	15	24	58	30	1.2503	0	0	0
102326	chr9	AC234180.1_FG002	AC234180.1_FG002	1991	20	17	42	78	1.2503	0	0	0
104041	chr9	PIN1a	GRMZM2G098643	2566	3	2	12	40	1.2503	0	0	0
3026	chr10	GRMZM2G119023	GRMZM2G119023	843	4	2	10	27	1.2503	0	0	0
104126	chr9	GRMZM2G103113	GRMZM2G103113	1401	23	68	59	68	1.25031	0	0	0
16571	chr1	GRMZM2G322847	GRMZM2G322847	972	30	7	25	43	1.25031	0	0	0
30627	chr2	GRMZM2G170161	GRMZM2G170161	2372	42	14	47	85	1.25031	0	0	0
3412	chr10	GRMZM2G142820	GRMZM2G142820	1278	108	58	104	135	1.25031	0	0	0
95469	chr8	GRMZM2G128815	GRMZM2G128815	647	21	47	23	16	1.25031	0	0	0
93915	chr8	GRMZM2G051623	GRMZM2G051623	907	8	3	7	10	1.25033	0	0	0
1354	chr10	GRMZM2G007365	GRMZM2G007365	424	31	5	11	12	1.25033	0	0	0
75726	chr6	GRMZM2G052812	GRMZM2G052812	2016	78	106	132	240	1.25033	0	0	0
43382	chr3	GRMZM2G180620	GRMZM2G180620	1271	77	314	238	266	1.25033	0	0	0
14886	chr1	GRMZM2G141526	GRMZM2G141526	739	5	9	14	41	1.25034	0	0	0
53863	chr4	GRMZM2G117971	GRMZM2G117971	782	3	16	15	21	1.25034	0	0	0
42662	chr3	GRMZM2G147752	GRMZM2G147752	1906	3	15	173	89	1.25034	0	0	0
11140	chr1	GRMZM2G032171	GRMZM2G032171	1384	94	239	118	85	1.25034	0	0	0
14599	chr1	GRMZM2G132367	GRMZM2G132367	1909	3	7	13	65	1.25035	0	0	0
27405	chr2	GRMZM2G052078	GRMZM2G052078	4982	42	25	102	248	1.25035	0	0	0
95319	chr8	GRMZM2G121510	GRMZM2G121510	1378	30	46	78	91	1.25036	0	0	0
86082	chr7	GRMZM2G115354	GRMZM2G115354	1339	40	88	233	310	1.25036	0	0	0
86083	chr7	GRMZM2G115357	GRMZM2G115357	1339	40	88	233	310	1.25036	0	0	0
43071	chr3	GRMZM2G165746	GRMZM2G165746	1576	10	18	46	32	1.25037	0	0	0
101974	chr9	AC210102.3_FG004	AC210102.3_FG004	718	3	3	7	13	1.25037	0	0	0
44228	chr3	GRMZM2G369931	GRMZM2G369931	2818	97	157	349	239	1.25037	0	0	0
18797	chr1	GRMZM2G474602	GRMZM2G474602	747	3	2	6	12	1.25037	0	0	0
40220	chr3	GRMZM2G044598	GRMZM2G044598	714	3	2	6	12	1.25037	0	0	0
87497	chr7	GRMZM2G330743	GRMZM2G330743	504	4	4	6	2	1.25037	0	0	0
89432	chr7	GRMZM2G519116	GRMZM2G519116	386	6	2	3	3	1.25037	0	0	0
92741	chr8	AC216867.3_FG003	AC216867.3_FG003	357	2	4	12	8	1.25037	0	0	0
96122	chr8	GRMZM2G162278	GRMZM2G162278	1377	6	2	3	3	1.25037	0	0	0
100378	chr8	GRMZM2G700599	GRMZM2G700599	1842	3	6	18	12	1.25037	0	0	0
13666	chr1	GRMZM2G107571	GRMZM2G107571	2974	190	134	216	288	1.25038	0	0	0
5102	chr10	GRMZM2G443939	GRMZM2G443939	4650	106	179	328	444	1.25038	0	0	0
65818	chr5	GRMZM2G106061	GRMZM2G106061	2007	20227	45093	29000	24807	1.25038	0	0	0
12486	chr1	GRMZM2G072156	GRMZM2G072156	1948	158	163	278	414	1.25038	0	0	0
15385	chr1	GRMZM2G156756	GRMZM2G156756	3573	425	534	639	946	1.25039	0	0	0
93573	chr8	GRMZM2G033799	GRMZM2G033799	2555	40	25	106	268	1.25039	0	0	0
1633	chr10	GRMZM2G024811	GRMZM2G024811	2097	43	48	82	29	1.2504	0	0	0
64851	chr5	GRMZM2G069923	GRMZM2G069923	1900	7	29	153	330	1.2504	0	0	0
18005	chr1	GRMZM2G424383	GRMZM2G424383	1182	2	2	8	22	1.2504	0	0	0
24264	chr1	GRMZM5G895991	GRMZM5G895991	1957	20	33	84	43	1.2504	0	0	0
52769	chr4	GRMZM2G075496	GRMZM2G075496	1497	90	49	57	54	1.25041	0	0	0
29683	chr2	GRMZM2G136406	GRMZM2G136406	1595	172	279	587	472	1.25041	0	0	0
77861	chr6	GRMZM2G161673	GRMZM2G161673	1640	3633	2614	1218	3797	1.25041	0	0	0
93412	chr8	GRMZM2G027333	GRMZM2G027333	2664	4	10	44	24	1.25042	0	0	0
104075	chr9	GRMZM2G100103	GRMZM2G100103	1374	4	5	11	3	1.25042	0	0	0
49633	chr4	AC190816.3_FG002	AC190816.3_FG002	360	82	127	66	44	1.25043	0	0	0
39755	chr3	GRMZM2G026203	GRMZM2G026203	2499	6	10	10	94	1.25044	0	0	0
26296	chr2	GRMZM2G012858	GRMZM2G012858	3750	8	8	20	39	1.25044	0	0	0
44335	chr3	GRMZM2G381024	GRMZM2G381024	1873	4	9	34	19	1.25044	0	0	0
42886	chr3	GRMZM2G158232	GRMZM2G158232	844	1246	2473	686	298	1.25044	0	0	0
91027	chr7	GRMZM5G817350	GRMZM5G817350	1170	5	2	9	21	1.25045	0	0	0
12562	chr1	GRMZM2G074158	GRMZM2G074158	3506	1113	76	642	1467	1.25045	0	0	0
64821	chr5	GRMZM2G068531	GRMZM2G068531	1515	1528	292	443	383	1.25045	0	0	0
11146	chr1	GRMZM2G032328	GRMZM2G032328	1003	7	9	8	36	1.25045	0	0	0
17310	chr1	GRMZM2G376661	GRMZM2G376661	1983	2	3	14	48	1.25046	0	0	0
25115	chr2	AC203394.3_FG004	AC203394.3_FG004	510	2	3	14	48	1.25046	0	0	0
94593	chr8	GRMZM2G085491	GRMZM2G085491	303	4	3	7	12	1.25046	0	0	0
97624	chr8	GRMZM2G424778	GRMZM2G424778	422	4	3	7	12	1.25046	0	0	0
52162	chr4	GRMZM2G052995	GRMZM2G052995	3506	29	19	41	64	1.25046	0	0	0
27555	chr2	S1FA	GRMZM2G056929	954	573	345	186	163	1.25046	0	0	0
1257	chr10	GRMZM2G002921	GRMZM2G002921	744	2	4	10	11	1.25047	0	0	0
104577	chr9	GRMZM2G126781	GRMZM2G126781	2209	2	4	10	11	1.25047	0	0	0
3541	chr10	GRMZM2G150229	GRMZM2G150229	415	4	4	3	8	1.25048	0	0	0
10223	chr1	GRMZM2G007055	GRMZM2G007055	2050	3	6	9	48	1.25048	0	0	0
106428	chr9	GRMZM2G411417	GRMZM2G411417	524	2	2	15	65	1.25049	0	0	0
2830	chr10	GRMZM2G103785	GRMZM2G103785	1962	53	19	56	93	1.25049	0	0	0
54125	chr4	GRMZM2G125768	GRMZM2G125768	2608	10	4	23	64	1.25049	0	0	0
30932	chr2	GRMZM2G179827	GRMZM2G179827	1466	39	16	63	134	1.25049	0	0	0
75335	chr6	GRMZM2G032781	GRMZM2G032781	1275	3	6	13	21	1.2505	0	0	0
23404	chr1	GRMZM5G837008	GRMZM5G837008	608	3	3	2	8	1.25051	0	0	0
27442	chr2	GRMZM2G052908	GRMZM2G052908	1707	3	18	18	27	1.25051	0	0	0
42623	chr3	GRMZM2G145886	GRMZM2G145886	2148	3	3	2	8	1.25051	0	0	0
44411	chr3	GRMZM2G389299	GRMZM2G389299	1287	3	3	2	8	1.25051	0	0	0
93093	chr8	GRMZM2G010315	GRMZM2G010315	2556	53	73	113	114	1.25051	0	0	0
12351	chr1	GRMZM2G068471	GRMZM2G068471	2482	25	52	168	108	1.25051	0	0	0
13248	chr1	GRMZM2G093708	GRMZM2G093708	1562	2	2	11	38	1.25051	0	0	0
15424	chr1	GRMZM2G157772	GRMZM2G157772	635	3	3	10	24	1.25051	0	0	0
13892	chr1	GRMZM2G113098	GRMZM2G113098	1574	2	9	4	3	1.25052	0	0	0
36147	chr2	GRMZM2G587115	GRMZM2G587115	574	2	9	4	3	1.25052	0	0	0
101982	chr9	AC210199.4_FG003	AC210199.4_FG003	516	18	43	25	20	1.25052	0	0	0
51798	chr4	GRMZM2G039106	GRMZM2G039106	4018	40	97	314	353	1.25052	0	0	0
31408	chr2	GRMZM2G335703	GRMZM2G335703	339	3	3	9	20	1.25053	0	0	0
97295	chr8	GRMZM2G384755	GRMZM2G384755	2973	3	3	9	20	1.25053	0	0	0
77084	chr6	GRMZM2G124617	GRMZM2G124617	864	58	103	245	200	1.25053	0	0	0
99987	chr8	GRMZM2G576804	GRMZM2G576804	578	45	18	5	7	1.25054	0	0	0
23554	chr1	GRMZM5G848160	GRMZM5G848160	231	4	11	56	30	1.25054	0	0	0
39650	chr3	GRMZM2G022368	GRMZM2G022368	686	8	60	40	46	1.25055	0	0	0
66877	chr5	GRMZM2G145690	GRMZM2G145690	2844	2	12	10	13	1.25055	0	0	0
81641	chr6	GRMZM2G580204	GRMZM2G580204	368	4	25	6	3	1.25055	0	0	0
28403	chr2	GRMZM2G086876	GRMZM2G086876	2028	90	55	188	401	1.25056	0	0	0
85947	chr7	GRMZM2G108023	GRMZM2G108023	2005	3	4	9	3	1.25057	0	0	0
79272	chr6	GRMZM2G423669	GRMZM2G423669	962	26	122	60	49	1.25057	0	0	0
82681	chr6	GRMZM5G878080	GRMZM5G878080	962	26	122	60	49	1.25057	0	0	0
34171	chr2	GRMZM2G515974	GRMZM2G515974	650	70	41	19	25	1.25059	0	0	0
36518	chr2	GRMZM5G807267	GRMZM5G807267	1847	10411	1151	3192	3656	1.25059	0	0	0
53862	chr4	GRMZM2G117965	GRMZM2G117965	673	5	8	12	24	1.25059	0	0	0
70096	chr5	GRMZM2G502655	GRMZM2G502655	281	16	31	9	4	1.25059	0	0	0
103052	chr9	GRMZM2G040706	GRMZM2G040706	619	9	19	50	59	1.2506	0	0	0
37498	chr2	GRMZM5G889923	GRMZM5G889923	339	6	2	11	28	1.25061	0	0	0
29191	chr2	GRMZM2G115821	GRMZM2G115821	490	4	2	6	11	1.25061	0	0	0
86655	chr7	GRMZM2G146623	GRMZM2G146623	956	2	16	349	198	1.25061	0	0	0
65204	chr5	GRMZM2G083346	GRMZM2G083346	2332	17	27	56	44	1.25061	0	0	0
29721	chr2	GRMZM2G137734	GRMZM2G137734	4425	1497	4001	6138	10662	1.25061	0	0	0
93517	chr8	GRMZM2G030762	GRMZM2G030762	2485	89	33	100	170	1.25062	0	0	0
48855	chr3	GRMZM5G862219	GRMZM5G862219	2195	443	160	270	298	1.25064	0	0	0
77739	chr6	GRMZM2G156162	GRMZM2G156162	1686	86	75	129	184	1.25065	0	0	0
48304	chr3	GRMZM5G816891	GRMZM5G816891	1808	73	51	99	145	1.25065	0	0	0
78592	chr6	GRMZM2G341027	GRMZM2G341027	2439	35	60	118	141	1.25065	0	0	0
64072	chr5	GRMZM2G035708	GRMZM2G035708	1535	8431	2279	6116	8716	1.25065	0	0	0
13656	chr1	GRMZM2G107463	GRMZM2G107463	2031	155	136	260	401	1.25065	0	0	0
75827	chr6	GRMZM2G058472	GRMZM2G058472	2874	394	112	742	2063	1.25065	0	0	0
10332	chr1	GRMZM2G010000	GRMZM2G010000	1788	11	24	51	122	1.25066	0	0	0
3261	chr10	GRMZM2G133018	GRMZM2G133018	1204	429	69	331	622	1.25067	0	0	0
109749	chr9	GRMZM5G872184	GRMZM5G872184	1222	12	46	77	155	1.25067	0	0	0
60988	chr4	GRMZM5G821611	GRMZM5G821611	2186	116	182	260	566	1.25067	0	0	0
1467	chr10	GRMZM2G014568	GRMZM2G014568	1168	3	11	6	5	1.25068	0	0	0
43506	chr3	GRMZM2G309512	GRMZM2G309512	2976	3	11	6	5	1.25068	0	0	0
39738	chr3	GRMZM2G025817	GRMZM2G025817	1731	2	6	27	28	1.25068	0	0	0
19615	chr1	GRMZM2G502191	GRMZM2G502191	1921	157	217	274	353	1.25068	0	0	0
38577	chr3	AC208915.3_FG010	AC208915.3_FG010	780	840	1075	11321	66592	1.25068	0	0	0
11180	chr1	GRMZM2G033787	GRMZM2G033787	2121	312	240	118	435	1.25069	0	0	0
65721	chr5	GRMZM2G102560	GRMZM2G102560	2508	164	512	448	520	1.25069	0	0	0
30656	chr2	GRMZM2G171370	GRMZM2G171370	1832	133	36	62	64	1.2507	0	0	0
13271	chr1	GRMZM2G094252	GRMZM2G094252	1033	16	6	11	13	1.2507	0	0	0
94350	chr8	GRMZM2G074648	GRMZM2G074648	640	4	2	8	18	1.2507	0	0	0
32315	chr2	GRMZM2G408972	GRMZM2G408972	1126	33	26	9	127	1.25071	0	0	0
18586	chr1	GRMZM2G460903	GRMZM2G460903	1326	10	14	18	34	1.25073	0	0	0
96659	chr8	GRMZM2G315125	GRMZM2G315125	2692	439	331	693	1093	1.25074	0	0	0
12009	chr1	GRMZM2G058057	GRMZM2G058057	920	297	387	242	178	1.25074	0	0	0
14925	chr1	GRMZM2G143046	GRMZM2G143046	1315	4	3	8	15	1.25076	0	0	0
23221	chr1	GRMZM5G824626	GRMZM5G824626	669	2	2	33	250	1.25076	0	0	0
91327	chr7	GRMZM5G857369	GRMZM5G857369	932	31	11	13	11	1.25076	0	0	0
70312	chr5	GRMZM2G512033	GRMZM2G512033	166	11	27	18	16	1.25076	0	0	0
86081	chr7	GRMZM2G115304	GRMZM2G115304	2826	200	60	125	152	1.25077	0	0	0
63814	chr5	GRMZM2G024739	GRMZM2G024739	2897	395	548	792	988	1.25077	0	0	0
12888	chr1	GRMZM2G083437	GRMZM2G083437	3274	87	157	483	218	1.25077	0	0	0
3773	chr10	GRMZM2G164714	GRMZM2G164714	1976	383	344	534	712	1.25077	0	0	0
64291	chr5	GRMZM2G044788	GRMZM2G044788	965	2	14	11	14	1.25077	0	0	0
77490	chr6	GRMZM2G143559	GRMZM2G143559	1281	15	23	38	48	1.25078	0	0	0
27935	chr2	GRMZM2G071253	GRMZM2G071253	1198	3	27	21	28	1.25079	0	0	0
40614	chr3	GRMZM2G060027	GRMZM2G060027	1870	22	29	50	80	1.25079	0	0	0
44253	chr3	GRMZM2G372297	GRMZM2G372297	1573	832	3544	3005	3635	1.25079	0	0	0
39351	chr3	GRMZM2G010211	GRMZM2G010211	792	4	2	14	47	1.2508	0	0	0
51435	chr4	GRMZM2G021225	GRMZM2G021225	3155	28	57	121	221	1.25081	0	0	0
30819	chr2	GRMZM2G176274	GRMZM2G176274	2103	2	11	11	16	1.25081	0	0	0
84985	chr7	GRMZM2G055469	GRMZM2G055469	1303	2	6	15	86	1.25082	0	0	0
18464	chr1	GRMZM2G453794	GRMZM2G453794	2076	85	108	168	247	1.25082	0	0	0
100245	chr8	GRMZM2G588233	GRMZM2G588233	570	29	22	40	57	1.25082	0	0	0
68460	chr5	GRMZM2G369939	GRMZM2G369939	2194	265	455	809	1269	1.25082	0	0	0
108161	chr9	GRMZM2G545891	GRMZM2G545891	1925	13	26	87	46	1.25083	0	0	0
94271	chr8	GRMZM2G070747	GRMZM2G070747	1035	3	2	12	39	1.25083	0	0	0
2774	chr10	GRMZM2G099352	GRMZM2G099352	1774	458	624	1177	692	1.25084	0	0	0
22757	chr1	GRMZM2G703749	GRMZM2G703749	2508	6	13	38	38	1.25084	0	0	0
15207	chr1	GRMZM2G151997	GRMZM2G151997	1442	4	8	27	14	1.25085	0	0	0
29190	chr2	GRMZM2G115817	GRMZM2G115817	1420	78	54	105	153	1.25085	0	0	0
6311	chr10	GRMZM2G540129	GRMZM2G540129	173	32	14	4	8	1.25085	0	0	0
73432	chr5	GRMZM5G881546	GRMZM5G881546	157	16	7	2	4	1.25085	0	0	0
90921	chr7	GRMZM5G804064	GRMZM5G804064	2528	9	21	94	41	1.25088	0	0	0
30630	chr2	GRMZM2G170208	GRMZM2G170208	1809	3	6	45	3	1.25088	0	0	0
102552	chr9	GRMZM2G012140	GRMZM2G012140	1866	47	26	7	51	1.25089	0	0	0
21158	chr1	GRMZM2G548558	GRMZM2G548558	301	19	24	25	63	1.25089	0	0	0
87618	chr7	GRMZM2G348015	GRMZM2G348015	560	2121	260	846	1099	1.2509	0	0	0
99256	chr8	GRMZM2G538665	GRMZM2G538665	1229	14	2	17	46	1.2509	0	0	0
14302	chr1	GRMZM2G123714	GRMZM2G123714	1352	7	14	29	53	1.2509	0	0	0
100611	chr8	GRMZM5G820460	GRMZM5G820460	1164	108	116	278	532	1.25091	0	0	0
76875	chr6	ATPB	GRMZM2G113408	2721	2254	1240	2515	3538	1.25092	0	0	0
24014	chr1	GRMZM5G880508	GRMZM5G880508	2702	55	95	182	241	1.25092	0	0	0
41041	chr3	GRMZM2G077293	GRMZM2G077293	1131	55	25	34	34	1.25093	0	0	0
87474	chr7	GRMZM2G327394	GRMZM2G327394	3646	139	260	592	669	1.25093	0	0	0
68796	chr5	GRMZM2G398781	GRMZM2G398781	1706	93	207	122	96	1.25093	0	0	0
84948	chr7	GRMZM2G053958	GRMZM2G053958	1690	3	5	11	9	1.25093	0	0	0
11378	chr1	GRMZM2G040145	GRMZM2G040145	4978	997	672	1392	2104	1.25094	0	0	0
17992	chr1	GRMZM2G423538	GRMZM2G423538	1617	7	15	29	90	1.25094	0	0	0
73493	chr5	GRMZM5G886833	GRMZM5G886833	1234	5	7	12	10	1.25094	0	0	0
37545	chr2	GRMZM5G892921	GRMZM5G892921	248	2	4	15	6	1.25095	0	0	0
54717	chr4	GRMZM2G149127	GRMZM2G149127	1204	2	4	15	6	1.25095	0	0	0
53569	chr4	GRMZM2G106429	GRMZM2G106429	1700	3	3	11	28	1.25095	0	0	0
95817	chr8	GRMZM2G145905	GRMZM2G145905	3086	136	208	348	423	1.25096	0	0	0
53566	chr4	GRMZM2G106389	GRMZM2G106389	2389	48	35	94	175	1.25096	0	0	0
68731	chr5	GRMZM2G392798	GRMZM2G392798	3451	4	7	20	10	1.25097	0	0	0
18722	chr1	GRMZM2G470527	GRMZM2G470527	1462	80	111	150	229	1.251	0	0	0
50892	chr4	GRMZM2G002531	GRMZM2G002531	2003	5	23	23	32	1.251	0	0	0
59271	chr4	GRMZM2G543560	GRMZM2G543560	541	9	12	21	14	1.251	0	0	0
3420	chr10	GRMZM2G143102	GRMZM2G143102	2389	6	12	27	40	1.25101	0	0	0
93980	chr8	GRMZM2G055219	GRMZM2G055219	2452	12	6	22	46	1.25101	0	0	0
69617	chr5	GRMZM2G477688	GRMZM2G477688	2108	3	6	15	17	1.25102	0	0	0
65870	chr5	GRMZM2G108739	GRMZM2G108739	3140	127	145	233	340	1.25102	0	0	0
73060	chr5	GRMZM5G851655	GRMZM5G851655	797	2	2	17	79	1.25103	0	0	0
40602	chr3	GRMZM2G059642	GRMZM2G059642	585	2415	11439	10955	14810	1.25104	0	0	0
106019	chr9	GRMZM2G359566	GRMZM2G359566	1632	7	50	16	10	1.25105	0	0	0
28769	chr2	GRMZM2G100475	GRMZM2G100475	2479	14	3	12	21	1.25105	0	0	0
105043	chr9	GRMZM2G151992	GRMZM2G151992	1442	46	127	516	534	1.25105	0	0	0
82667	chr6	GRMZM5G876394	GRMZM5G876394	297	62	105	254	174	1.25106	0	0	0
23721	chr1	GRMZM5G859786	GRMZM5G859786	536	29	16	7	9	1.25107	0	0	0
52453	chr4	GRMZM2G063909	GRMZM2G063909	2028	77	38	85	124	1.25107	0	0	0
95883	chr8	PSY2	GRMZM2G149317	1804	596	1478	2137	3470	1.25107	0	0	0
42719	chr3	GRMZM2G150866	GRMZM2G150866	2311	51	37	109	216	1.25108	0	0	0
67192	chr5	GRMZM2G159759	GRMZM2G159759	1433	104	496	472	635	1.25109	0	0	0
15339	chr1	GRMZM2G155422	GRMZM2G155422	1664	14	35	42	59	1.2511	0	0	0
10548	chr1	GRMZM2G015767	GRMZM2G015767	2186	11	27	115	70	1.25111	0	0	0
30828	chr2	GRMZM2G176375	GRMZM2G176375	1087	5	8	13	20	1.25111	0	0	0
95283	chr8	GRMZM2G119361	GRMZM2G119361	2086	46	98	318	234	1.25112	0	0	0
65381	chr5	GRMZM2G089448	GRMZM2G089448	1657	152	82	248	460	1.25113	0	0	0
76328	chr6	GRMZM2G085330	GRMZM2G085330	326	7	7	14	23	1.25114	0	0	0
13470	chr1	GRMZM2G100622	GRMZM2G100622	1104	39	23	18	13	1.25114	0	0	0
48130	chr3	GRMZM5G801109	GRMZM5G801109	494	11	26	7	3	1.25114	0	0	0
54435	chr4	GRMZM2G138936	GRMZM2G138936	1848	101	45	62	62	1.25115	0	0	0
67209	chr5	GRMZM2G160231	GRMZM2G160231	1558	29	66	68	83	1.25115	0	0	0
15967	chr1	GRMZM2G174691	GRMZM2G174691	1714	7	23	24	32	1.25116	0	0	0
11044	chr1	GRMZM2G029888	GRMZM2G029888	469	2	14	15	24	1.25116	0	0	0
76223	chr6	GRMZM2G078742	GRMZM2G078742	640	2	14	15	24	1.25116	0	0	0
66186	chr5	GRMZM2G120035	GRMZM2G120035	1431	27	120	105	130	1.25117	0	0	0
30606	chr2	GRMZM2G169066	GRMZM2G169066	1661	37	103	537	308	1.25117	0	0	0
95100	chr8	GRMZM2G111411	GRMZM2G111411	1291	228	308	556	362	1.25117	0	0	0
10440	chr1	GRMZM2G012758	GRMZM2G012758	2621	39	153	923	1227	1.25119	0	0	0
66040	chr5	pglcat8	GRMZM2G113655	2512	40	63	195	498	1.25119	0	0	0
3484	chr10	GRMZM2G148404	GRMZM2G148404	997	7	9	24	52	1.2512	0	0	0
106734	chr9	GRMZM2G452896	GRMZM2G452896	1905	2	7	27	66	1.2512	0	0	0
95668	chr8	GRMZM2G138995	GRMZM2G138995	2436	29	57	134	168	1.25121	0	0	0
54719	chr4	GRMZM2G149150	GRMZM2G149150	2025	7	13	29	34	1.25122	0	0	0
96216	chr8	GRMZM2G166441	GRMZM2G166441	1617	97	117	129	217	1.25123	0	0	0
57442	chr4	GRMZM2G469873	GRMZM2G469873	2361	54	13	39	57	1.25123	0	0	0
72803	chr5	GRMZM5G830401	GRMZM5G830401	624	5	6	12	4	1.25123	0	0	0
55499	chr4	GRMZM2G178758	GRMZM2G178758	3234	109	94	147	194	1.25123	0	0	0
85366	chr7	GRMZM2G074811	GRMZM2G074811	1097	15	66	17	8	1.25124	0	0	0
23059	chr1	GRMZM5G813886	GRMZM5G813886	2969	1092	4157	4137	5474	1.25124	0	0	0
5076	chr10	GRMZM2G442195	GRMZM2G442195	2711	233	536	556	683	1.25125	0	0	0
103255	chr9	GRMZM2G053335	GRMZM2G053335	1484	58	58	214	544	1.25125	0	0	0
85053	chr7	GRMZM2G058197	GRMZM2G058197	3158	15	33	82	133	1.25126	0	0	0
41988	chr3	GRMZM2G118362	GRMZM2G118362	2185	8	21	99	60	1.25126	0	0	0
93783	chr8	GRMZM2G044963	GRMZM2G044963	1084	55	77	139	103	1.25126	0	0	0
106407	chr9	GRMZM2G408376	GRMZM2G408376	1825	112	171	308	311	1.25127	0	0	0
72889	chr5	GRMZM5G837108	GRMZM5G837108	1387	2199	1375	3218	5166	1.25127	0	0	0
18541	chr1	GRMZM2G458441	GRMZM2G458441	1419	8	3	13	28	1.25127	0	0	0
84573	chr7	GRMZM2G032759	GRMZM2G032759	1342	27	19	32	42	1.25128	0	0	0
96361	chr8	GRMZM2G172396	GRMZM2G172396	3557	2	17	16	24	1.25128	0	0	0
75999	chr6	GRMZM2G066153	GRMZM2G066153	3012	6	5	9	13	1.25128	0	0	0
36522	chr2	GRMZM5G807639	GRMZM5G807639	1893	125	346	436	649	1.25129	0	0	0
16269	chr1	GRMZM2G303121	GRMZM2G303121	835	10	11	17	8	1.25129	0	0	0
42461	chr3	GRMZM2G138729	GRMZM2G138729	543	20	6	13	16	1.2513	0	0	0
86760	chr7	GRMZM2G152059	GRMZM2G152059	1699	122	33	145	287	1.2513	0	0	0
86388	chr7	GRMZM2G133492	GRMZM2G133492	472	17	3	9	12	1.25131	0	0	0
55780	chr4	GRMZM2G315072	GRMZM2G315072	2835	36	46	45	156	1.25132	0	0	0
86537	chr7	GRMZM2G140758	GRMZM2G140758	915	190	526	227	145	1.25133	0	0	0
1202	chr10	GRMZM2G000633	GRMZM2G000633	1518	6	17	61	96	1.25134	0	0	0
57429	chr4	GRMZM2G468260	GRMZM2G468260	2470	337	153	500	928	1.25134	0	0	0
44581	chr3	GRMZM2G406438	GRMZM2G406438	975	848	1128	12344	73819	1.25135	0	0	0
94142	chr8	GRMZM2G063069	GRMZM2G063069	1837	12	12	31	61	1.25136	0	0	0
86845	chr7	GRMZM2G158237	GRMZM2G158237	2640	54	140	132	154	1.25136	0	0	0
85233	chr7	GRMZM2G068519	GRMZM2G068519	1485	5	8	68	358	1.25136	0	0	0
27969	chr2	GRMZM2G072383	GRMZM2G072383	643	9	2	22	79	1.25137	0	0	0
4258	chr10	GRMZM2G325687	GRMZM2G325687	833	20	52	28	21	1.25137	0	0	0
10772	chr1	GRMZM2G022643	GRMZM2G022643	244	2	7	3	2	1.25137	0	0	0
18979	chr1	GRMZM2G484072	GRMZM2G484072	696	2	7	3	2	1.25137	0	0	0
42792	chr3	GRMZM2G154048	GRMZM2G154048	1270	2	7	3	2	1.25137	0	0	0
108503	chr9	GRMZM2G564966	GRMZM2G564966	583	2	7	3	2	1.25137	0	0	0
63546	chr5	GRMZM2G014170	GRMZM2G014170	2628	142	99	204	308	1.25137	0	0	0
29437	chr2	GRMZM2G126062	GRMZM2G126062	1908	2	13	14	22	1.25138	0	0	0
94862	chr8	GRMZM2G097768	GRMZM2G097768	2179	287	307	536	813	1.25139	0	0	0
74616	chr6	AC215201.3_FG003	AC215201.3_FG003	1589	5	3	9	17	1.25141	0	0	0
66414	chr5	GRMZM2G128214	GRMZM2G128214	2245	297	206	477	781	1.25141	0	0	0
42192	chr3	GRMZM2G126718	GRMZM2G126718	848	4	2	7	14	1.25142	0	0	0
56926	chr4	GRMZM2G419994	GRMZM2G419994	1492	196	54	72	61	1.25142	0	0	0
29591	chr2	GRMZM2G132968	GRMZM2G132968	1951	154	245	543	380	1.25142	0	0	0
51038	chr4	GRMZM2G008297	GRMZM2G008297	735	3	5	15	38	1.25142	0	0	0
11953	chr1	GRMZM2G056815	GRMZM2G056815	915	2	2	12	43	1.25143	0	0	0
55812	chr4	GRMZM2G316789	GRMZM2G316789	1237	2	2	12	43	1.25143	0	0	0
11860	chr1	GRMZM2G053757	GRMZM2G053757	804	6	2	5	7	1.25143	0	0	0
40381	chr3	GRMZM2G050903	GRMZM2G050903	656	6	2	5	7	1.25143	0	0	0
37577	chr2	GRMZM5G895503	GRMZM5G895503	398	15	6	7	6	1.25145	0	0	0
63992	chr5	GRMZM2G031952	GRMZM2G031952	1724	54	129	121	138	1.25146	0	0	0
64625	chr5	GRMZM2G060150	GRMZM2G060150	1945	11	16	8	5	1.25147	0	0	0
3762	chr10	GRMZM2G164538	GRMZM2G164538	1913	65	106	155	382	1.25147	0	0	0
75128	chr6	GRMZM2G021470	GRMZM2G021470	1224	51	93	62	51	1.25148	0	0	0
91174	chr7	GRMZM5G836824	GRMZM5G836824	672	10	8	15	22	1.25148	0	0	0
88793	chr7	GRMZM2G486781	GRMZM2G486781	886	107	134	161	236	1.25151	0	0	0
14204	chr1	GRMZM2G120657	GRMZM2G120657	3276	4	7	11	29	1.25153	0	0	0
64539	chr5	GRMZM2G056766	GRMZM2G056766	3066	43	79	156	240	1.25154	0	0	0
90990	chr7	GRMZM5G813217	GRMZM5G813217	2694	821	1089	1737	1464	1.25154	0	0	0
106478	chr9	GRMZM2G418194	GRMZM2G418194	1741	128	56	69	63	1.25157	0	0	0
17713	chr1	GRMZM2G406550	GRMZM2G406550	283	4	4	3	9	1.25157	0	0	0
25127	chr2	AC203879.3_FG008	AC203879.3_FG008	75	3	4	4	16	1.25157	0	0	0
42089	chr3	GRMZM2G122584	GRMZM2G122584	853	285	68	368	806	1.25159	0	0	0
7971	chr1	AC166636.1_FG007	AC166636.1_FG007	720	2	2	19	94	1.2516	0	0	0
14421	chr1	GRMZM2G127150	GRMZM2G127150	1900	11	26	107	65	1.2516	0	0	0
67450	chr5	GRMZM2G169326	GRMZM2G169326	1007	5	5	22	63	1.2516	0	0	0
65242	chr5	GRMZM2G084521	GRMZM2G084521	1889	53	148	180	260	1.25161	0	0	0
17498	chr1	GRMZM2G391288	GRMZM2G391288	2417	2	5	15	24	1.25162	0	0	0
12332	chr1	GRMZM2G068028	GRMZM2G068028	2306	7	16	71	32	1.25162	0	0	0
76012	chr6	GRMZM2G066575	GRMZM2G066575	4309	66	132	329	384	1.25162	0	0	0
54744	chr4	GRMZM2G150251	GRMZM2G150251	1665	58	68	90	115	1.25163	0	0	0
55972	chr4	GRMZM2G332522	GRMZM2G332522	1262	2	3	14	47	1.25163	0	0	0
64635	chr5	GRMZM2G060659	GRMZM2G060659	3092	8	4	16	35	1.25163	0	0	0
39166	chr3	GRMZM2G001566	GRMZM2G001566	1215	7	6	4	9	1.25163	0	0	0
92920	chr8	GRMZM2G002034	GRMZM2G002034	2062	10	19	64	30	1.25164	0	0	0
251	chr10	AC177873.3_FG003	AC177873.3_FG003	459	2	2	3	4	1.25165	0	0	0
544	chr10	AC197771.3_FG001	AC197771.3_FG001	932	2	2	3	4	1.25165	0	0	0
568	chr10	AC198420.4_FG006	AC198420.4_FG006	177	2	2	3	4	1.25165	0	0	0
762	chr10	AC201971.4_FG006	AC201971.4_FG006	411	2	2	3	4	1.25165	0	0	0
795	chr10	AC202912.3_FG007	AC202912.3_FG007	162	2	2	3	4	1.25165	0	0	0
947	chr10	AC208827.3_FG001	AC208827.3_FG001	342	2	2	3	4	1.25165	0	0	0
1232	chr10	GRMZM2G001427	GRMZM2G001427	699	2	2	3	4	1.25165	0	0	0
1342	chr10	GRMZM2G006870	GRMZM2G006870	1667	2	2	3	4	1.25165	0	0	0
1600	chr10	GRMZM2G022792	GRMZM2G022792	2258	2	2	3	4	1.25165	0	0	0
1624	chr10	GRMZM2G023978	GRMZM2G023978	597	2	2	3	4	1.25165	0	0	0
1812	chr10	GRMZM2G036508	GRMZM2G036508	573	2	2	3	4	1.25165	0	0	0
2152	chr10	GRMZM2G059010	GRMZM2G059010	2435	2	2	3	4	1.25165	0	0	0
2294	chr10	GRMZM2G068102	GRMZM2G068102	932	2	2	3	4	1.25165	0	0	0
2316	chr10	GRMZM2G069460	GRMZM2G069460	846	2	2	3	4	1.25165	0	0	0
2451	chr10	GRMZM2G078264	GRMZM2G078264	2739	2	2	3	4	1.25165	0	0	0
2527	chr10	GRMZM2G084312	GRMZM2G084312	462	2	2	3	4	1.25165	0	0	0
2552	chr10	GRMZM2G086136	GRMZM2G086136	1448	2	2	3	4	1.25165	0	0	0
3282	chr10	GRMZM2G134523	GRMZM2G134523	593	2	2	3	4	1.25165	0	0	0
3406	chr10	GRMZM2G142680	GRMZM2G142680	3114	2	2	3	4	1.25165	0	0	0
3628	chr10	GRMZM2G155211	GRMZM2G155211	841	2	2	3	4	1.25165	0	0	0
3770	chr10	GRMZM2G164645	GRMZM2G164645	1271	2	2	3	4	1.25165	0	0	0
3800	chr10	GRMZM2G167295	GRMZM2G167295	820	2	2	3	4	1.25165	0	0	0
4114	chr10	GRMZM2G305329	GRMZM2G305329	683	2	2	3	4	1.25165	0	0	0
4334	chr10	GRMZM2G337385	GRMZM2G337385	1658	2	2	3	4	1.25165	0	0	0
4395	chr10	GRMZM2G343908	GRMZM2G343908	279	2	2	3	4	1.25165	0	0	0
4454	chr10	GRMZM2G352788	GRMZM2G352788	702	2	2	3	4	1.25165	0	0	0
4605	chr10	GRMZM2G374025	GRMZM2G374025	337	2	2	3	4	1.25165	0	0	0
4923	chr10	GRMZM2G423486	GRMZM2G423486	1275	2	2	3	4	1.25165	0	0	0
5019	chr10	GRMZM2G434553	GRMZM2G434553	339	2	2	3	4	1.25165	0	0	0
5503	chr10	GRMZM2G490667	GRMZM2G490667	119	2	2	3	4	1.25165	0	0	0
6747	chr10	GRMZM2G568532	GRMZM2G568532	110	2	2	3	4	1.25165	0	0	0
6958	chr10	GRMZM2G580235	GRMZM2G580235	352	2	2	3	4	1.25165	0	0	0
7006	chr10	GRMZM2G583884	GRMZM2G583884	991	2	2	3	4	1.25165	0	0	0
7165	chr10	GRMZM2G701134	GRMZM2G701134	276	2	2	3	4	1.25165	0	0	0
7277	chr10	GRMZM5G804944	GRMZM5G804944	171	2	2	3	4	1.25165	0	0	0
7842	chr10	GRMZM5G883941	GRMZM5G883941	333	2	2	3	4	1.25165	0	0	0
7899	chr10	GRMZM5G891058	GRMZM5G891058	734	2	2	3	4	1.25165	0	0	0
8107	chr1	AC186189.3_FG005	AC186189.3_FG005	690	2	2	3	4	1.25165	0	0	0
8128	chr1	AC186233.3_FG007	AC186233.3_FG007	2424	2	2	3	4	1.25165	0	0	0
8135	chr1	AC186283.4_FG002	AC186283.4_FG002	510	2	2	3	4	1.25165	0	0	0
8508	chr1	AC194856.3_FG002	AC194856.3_FG002	207	2	2	3	4	1.25165	0	0	0
8603	chr1	AC196018.3_FG001	AC196018.3_FG001	291	2	2	3	4	1.25165	0	0	0
8650	chr1	AC196645.3_FG008	AC196645.3_FG008	273	2	2	3	4	1.25165	0	0	0
8932	chr1	AC203832.3_FG002	AC203832.3_FG002	366	2	2	3	4	1.25165	0	0	0
9331	chr1	AC208676.2_FG004	AC208676.2_FG004	213	2	2	3	4	1.25165	0	0	0
9427	chr1	AC210049.3_FG001	AC210049.3_FG001	726	2	2	3	4	1.25165	0	0	0
9429	chr1	AC210173.4_FG001	AC210173.4_FG001	330	2	2	3	4	1.25165	0	0	0
9443	chr1	AC210317.4_FG005	AC210317.4_FG005	315	2	2	3	4	1.25165	0	0	0
9483	chr1	AC211166.5_FG009	AC211166.5_FG009	558	2	2	3	4	1.25165	0	0	0
9681	chr1	AC214496.3_FG007	AC214496.3_FG007	342	2	2	3	4	1.25165	0	0	0
9815	chr1	AC217653.3_FG003	AC217653.3_FG003	558	2	2	3	4	1.25165	0	0	0
10625	chr1	GRMZM2G017457	GRMZM2G017457	1177	2	2	3	4	1.25165	0	0	0
11064	chr1	GRMZM2G030414	GRMZM2G030414	246	2	2	3	4	1.25165	0	0	0
11154	chr1	GRMZM2G032503	GRMZM2G032503	365	2	2	3	4	1.25165	0	0	0
11429	chr1	GRMZM2G041227	GRMZM2G041227	267	2	2	3	4	1.25165	0	0	0
11533	chr1	GRMZM2G043523	GRMZM2G043523	1023	2	2	3	4	1.25165	0	0	0
11667	chr1	GRMZM2G047628	GRMZM2G047628	1118	2	2	3	4	1.25165	0	0	0
11838	chr1	GRMZM2G053016	GRMZM2G053016	907	2	2	3	4	1.25165	0	0	0
12455	chr1	GRMZM2G071133	GRMZM2G071133	1092	2	2	3	4	1.25165	0	0	0
12883	chr1	GRMZM2G083248	GRMZM2G083248	1914	2	2	3	4	1.25165	0	0	0
12925	chr1	GRMZM2G084532	GRMZM2G084532	360	2	2	3	4	1.25165	0	0	0
13022	chr1	GRMZM2G087416	GRMZM2G087416	1214	2	2	3	4	1.25165	0	0	0
13070	chr1	GRMZM2G088769	GRMZM2G088769	399	2	2	3	4	1.25165	0	0	0
13097	chr1	GRMZM2G089720	GRMZM2G089720	1506	2	2	3	4	1.25165	0	0	0
13161	chr1	GRMZM2G091634	GRMZM2G091634	1385	2	2	3	4	1.25165	0	0	0
13365	chr1	GRMZM2G097237	GRMZM2G097237	636	2	2	3	4	1.25165	0	0	0
13691	chr1	GRMZM2G107866	GRMZM2G107866	1333	2	2	3	4	1.25165	0	0	0
13728	chr1	GRMZM2G108663	GRMZM2G108663	863	2	2	3	4	1.25165	0	0	0
14332	chr1	GRMZM2G124281	GRMZM2G124281	1501	3	4	6	6	1.25165	0	0	0
14511	chr1	GRMZM2G129684	GRMZM2G129684	1286	2	2	3	4	1.25165	0	0	0
15010	chr1	GRMZM2G145866	GRMZM2G145866	267	2	2	3	4	1.25165	0	0	0
15094	chr1	GRMZM2G148700	GRMZM2G148700	693	2	2	3	4	1.25165	0	0	0
15651	chr1	GRMZM2G164787	GRMZM2G164787	1424	2	2	3	4	1.25165	0	0	0
15664	chr1	GRMZM2G165362	GRMZM2G165362	1041	2	2	3	4	1.25165	0	0	0
16019	chr1	GRMZM2G176451	GRMZM2G176451	627	2	2	3	4	1.25165	0	0	0
16062	chr1	GRMZM2G177445	GRMZM2G177445	2157	2	2	3	4	1.25165	0	0	0
16261	chr1	GRMZM2G302624	GRMZM2G302624	324	2	2	3	4	1.25165	0	0	0
16374	chr1	GRMZM2G309731	GRMZM2G309731	511	2	2	3	4	1.25165	0	0	0
16480	chr1	GRMZM2G317317	GRMZM2G317317	1170	2	2	3	4	1.25165	0	0	0
16891	chr1	GRMZM2G345635	GRMZM2G345635	1008	2	2	3	4	1.25165	0	0	0
16927	chr1	GRMZM2G348349	GRMZM2G348349	754	2	2	3	4	1.25165	0	0	0
17147	chr1	GRMZM2G362960	GRMZM2G362960	768	2	2	3	4	1.25165	0	0	0
17411	chr1	GRMZM2G383631	GRMZM2G383631	1106	2	2	3	4	1.25165	0	0	0
17516	chr1	GRMZM2G392092	GRMZM2G392092	367	2	2	3	4	1.25165	0	0	0
17848	chr1	GRMZM2G415208	GRMZM2G415208	1314	2	2	3	4	1.25165	0	0	0
17924	chr1	GRMZM2G419535	GRMZM2G419535	726	2	2	3	4	1.25165	0	0	0
18043	chr1	GRMZM2G427143	GRMZM2G427143	751	2	2	3	4	1.25165	0	0	0
18096	chr1	GRMZM2G430371	GRMZM2G430371	1452	2	2	3	4	1.25165	0	0	0
18127	chr1	GRMZM2G433295	GRMZM2G433295	447	2	2	3	4	1.25165	0	0	0
18248	chr1	GRMZM2G442109	GRMZM2G442109	1079	2	2	3	4	1.25165	0	0	0
18292	chr1	GRMZM2G445296	GRMZM2G445296	828	2	2	3	4	1.25165	0	0	0
18321	chr1	GRMZM2G447097	GRMZM2G447097	1873	2	2	3	4	1.25165	0	0	0
18355	chr1	GRMZM2G448589	GRMZM2G448589	384	2	2	3	4	1.25165	0	0	0
18371	chr1	GRMZM2G449212	GRMZM2G449212	3036	2	2	3	4	1.25165	0	0	0
18900	chr1	GRMZM2G481211	GRMZM2G481211	1008	2	2	3	4	1.25165	0	0	0
19600	chr1	GRMZM2G501798	GRMZM2G501798	431	2	2	3	4	1.25165	0	0	0
19632	chr1	GRMZM2G502709	GRMZM2G502709	473	2	2	3	4	1.25165	0	0	0
20429	chr1	GRMZM2G526330	GRMZM2G526330	89	2	2	3	4	1.25165	0	0	0
20749	chr1	GRMZM2G536072	GRMZM2G536072	537	2	2	3	4	1.25165	0	0	0
20983	chr1	GRMZM2G542926	GRMZM2G542926	140	2	2	3	4	1.25165	0	0	0
20994	chr1	GRMZM2G543205	GRMZM2G543205	1381	2	2	3	4	1.25165	0	0	0
21077	chr1	GRMZM2G546118	GRMZM2G546118	444	2	2	3	4	1.25165	0	0	0
21165	chr1	GRMZM2G548638	GRMZM2G548638	89	2	2	3	4	1.25165	0	0	0
21631	chr1	GRMZM2G561114	GRMZM2G561114	265	2	2	3	4	1.25165	0	0	0
21861	chr1	GRMZM2G567890	GRMZM2G567890	332	2	2	3	4	1.25165	0	0	0
21992	chr1	GRMZM2G572161	GRMZM2G572161	533	2	2	3	4	1.25165	0	0	0
22060	chr1	GRMZM2G573907	GRMZM2G573907	591	2	2	3	4	1.25165	0	0	0
22539	chr1	GRMZM2G588128	GRMZM2G588128	345	2	2	3	4	1.25165	0	0	0
22857	chr1	GRMZM5G800212	GRMZM5G800212	369	2	2	3	4	1.25165	0	0	0
22891	chr1	GRMZM5G802416	GRMZM5G802416	2348	2	2	3	4	1.25165	0	0	0
23094	chr1	GRMZM5G815823	GRMZM5G815823	1491	2	2	3	4	1.25165	0	0	0
23444	chr1	GRMZM5G839481	GRMZM5G839481	555	2	2	3	4	1.25165	0	0	0
23482	chr1	GRMZM5G842306	GRMZM5G842306	1479	2	2	3	4	1.25165	0	0	0
23605	chr1	GRMZM5G851633	GRMZM5G851633	351	2	2	3	4	1.25165	0	0	0
23732	chr1	GRMZM5G860510	GRMZM5G860510	1058	2	2	3	4	1.25165	0	0	0
23780	chr1	GRMZM5G863970	GRMZM5G863970	639	2	2	3	4	1.25165	0	0	0
23849	chr1	GRMZM5G869124	GRMZM5G869124	447	2	2	3	4	1.25165	0	0	0
23928	chr1	GRMZM5G875327	GRMZM5G875327	201	2	2	3	4	1.25165	0	0	0
24044	chr1	GRMZM5G881798	GRMZM5G881798	495	2	2	3	4	1.25165	0	0	0
24331	chr2	AC155352.2_FG006	AC155352.2_FG006	393	2	2	3	4	1.25165	0	0	0
24389	chr2	AC177933.2_FG002	AC177933.2_FG002	1236	2	2	3	4	1.25165	0	0	0
24807	chr2	AC195191.3_FG004	AC195191.3_FG004	414	2	2	3	4	1.25165	0	0	0
25093	chr2	AC202940.3_FG004	AC202940.3_FG004	432	2	2	3	4	1.25165	0	0	0
25146	chr2	AC204255.3_FG004	AC204255.3_FG004	534	2	2	3	4	1.25165	0	0	0
25726	chr2	AC215879.3_FG009	AC215879.3_FG009	294	2	2	3	4	1.25165	0	0	0
26115	chr2	GRMZM2G007418	GRMZM2G007418	430	2	2	3	4	1.25165	0	0	0
26677	chr2	GRMZM2G026558	GRMZM2G026558	2060	2	2	3	4	1.25165	0	0	0
27068	chr2	GRMZM2G040917	GRMZM2G040917	1020	2	2	3	4	1.25165	0	0	0
27118	chr2	GRMZM2G042765	GRMZM2G042765	678	2	2	3	4	1.25165	0	0	0
27599	chr2	GRMZM2G058424	GRMZM2G058424	2049	2	2	3	4	1.25165	0	0	0
27793	chr2	GRMZM2G065783	GRMZM2G065783	397	2	2	3	4	1.25165	0	0	0
27805	chr2	GRMZM2G065967	GRMZM2G065967	665	2	2	3	4	1.25165	0	0	0
27894	chr2	GRMZM2G069556	GRMZM2G069556	643	2	2	3	4	1.25165	0	0	0
28012	chr2	GRMZM2G074136	GRMZM2G074136	297	2	2	3	4	1.25165	0	0	0
28056	chr2	GRMZM2G075742	GRMZM2G075742	694	2	2	3	4	1.25165	0	0	0
28168	chr2	GRMZM2G079231	GRMZM2G079231	2083	2	2	3	4	1.25165	0	0	0
28922	chr2	GRMZM2G106092	GRMZM2G106092	1626	2	2	3	4	1.25165	0	0	0
29345	chr2	Myb41	GRMZM2G123202	1408	2	2	3	4	1.25165	0	0	0
30073	chr2	GRMZM2G150366	GRMZM2G150366	505	2	2	3	4	1.25165	0	0	0
30516	chr2	GRMZM2G165675	GRMZM2G165675	1775	2	2	3	4	1.25165	0	0	0
30609	chr2	GRMZM2G169123	GRMZM2G169123	426	2	2	3	4	1.25165	0	0	0
30629	chr2	GRMZM2G170188	GRMZM2G170188	419	2	2	3	4	1.25165	0	0	0
31183	chr2	GRMZM2G318156	GRMZM2G318156	854	2	2	3	4	1.25165	0	0	0
31529	chr2	GRMZM2G344183	GRMZM2G344183	1201	2	2	3	4	1.25165	0	0	0
31565	chr2	GRMZM2G347841	GRMZM2G347841	906	2	2	3	4	1.25165	0	0	0
31801	chr2	GRMZM2G366130	GRMZM2G366130	948	2	2	3	4	1.25165	0	0	0
31838	chr2	GRMZM2G369079	GRMZM2G369079	711	2	2	3	4	1.25165	0	0	0
32242	chr2	GRMZM2G402702	GRMZM2G402702	2398	2	2	3	4	1.25165	0	0	0
32360	chr2	GRMZM2G412717	GRMZM2G412717	462	2	2	3	4	1.25165	0	0	0
32477	chr2	GRMZM2G421453	GRMZM2G421453	441	2	2	3	4	1.25165	0	0	0
32575	chr2	GRMZM2G431575	GRMZM2G431575	594	2	2	3	4	1.25165	0	0	0
32992	chr2	GRMZM2G467612	GRMZM2G467612	426	2	2	3	4	1.25165	0	0	0
33061	chr2	GRMZM2G473925	GRMZM2G473925	1415	2	2	3	4	1.25165	0	0	0
33539	chr2	GRMZM2G495466	GRMZM2G495466	87	2	2	3	4	1.25165	0	0	0
34686	chr2	GRMZM2G534448	GRMZM2G534448	354	2	2	3	4	1.25165	0	0	0
36317	chr2	GRMZM2G703013	GRMZM2G703013	360	2	2	3	4	1.25165	0	0	0
36389	chr2	GRMZM2G703265	GRMZM2G703265	481	2	2	3	4	1.25165	0	0	0
36934	chr2	GRMZM5G842631	GRMZM5G842631	483	2	2	3	4	1.25165	0	0	0
37117	chr2	GRMZM5G859176	GRMZM5G859176	300	2	2	3	4	1.25165	0	0	0
37934	chr3	AC191650.3_FG005	AC191650.3_FG005	549	2	2	3	4	1.25165	0	0	0
38000	chr3	AC194022.3_FG001	AC194022.3_FG001	969	2	2	3	4	1.25165	0	0	0
38314	chr3	AC202445.4_FG004	AC202445.4_FG004	294	2	2	3	4	1.25165	0	0	0
38348	chr3	AC203326.3_FG002	AC203326.3_FG002	1545	2	2	3	4	1.25165	0	0	0
38426	chr3	AC204707.4_FG003	AC204707.4_FG003	447	2	2	3	4	1.25165	0	0	0
38513	chr3	AC207472.3_FG014	AC207472.3_FG014	465	2	2	3	4	1.25165	0	0	0
38518	chr3	AC207628.4_FG005	AC207628.4_FG005	834	2	2	3	4	1.25165	0	0	0
38656	chr3	AC209884.3_FG007	AC209884.3_FG007	753	2	2	3	4	1.25165	0	0	0
38797	chr3	AC212145.4_FG002	AC212145.4_FG002	825	2	2	3	4	1.25165	0	0	0
38902	chr3	AC215180.3_FG004	AC215180.3_FG004	438	2	2	3	4	1.25165	0	0	0
39149	chr3	GRMZM2G000614	GRMZM2G000614	4702	2	2	3	4	1.25165	0	0	0
39380	chr3	GRMZM2G011115	GRMZM2G011115	503	2	2	3	4	1.25165	0	0	0
39455	chr3	GRMZM2G014590	GRMZM2G014590	1006	2	2	3	4	1.25165	0	0	0
39548	chr3	GRMZM2G018399	GRMZM2G018399	297	2	2	3	4	1.25165	0	0	0
39714	chr3	GRMZM2G024778	GRMZM2G024778	712	3	4	6	6	1.25165	0	0	0
40016	chr3	GRMZM2G035625	GRMZM2G035625	1997	2	2	3	4	1.25165	0	0	0
40114	chr3	GRMZM2G040276	GRMZM2G040276	1422	2	2	3	4	1.25165	0	0	0
40214	chr3	GRMZM2G044503	GRMZM2G044503	796	2	2	3	4	1.25165	0	0	0
40221	chr3	GRMZM2G044608	GRMZM2G044608	534	2	2	3	4	1.25165	0	0	0
40388	chr3	GRMZM2G051153	GRMZM2G051153	1640	2	2	3	4	1.25165	0	0	0
40943	chr3	GRMZM2G072370	GRMZM2G072370	523	2	2	3	4	1.25165	0	0	0
41219	chr3	GRMZM2G084320	GRMZM2G084320	264	2	2	3	4	1.25165	0	0	0
41249	chr3	GRMZM2G085392	GRMZM2G085392	1019	2	2	3	4	1.25165	0	0	0
41317	chr3	GRMZM2G087813	GRMZM2G087813	395	2	2	3	4	1.25165	0	0	0
41351	chr3	GRMZM2G089525	GRMZM2G089525	1681	2	2	3	4	1.25165	0	0	0
41813	chr3	GRMZM2G111025	GRMZM2G111025	375	2	2	3	4	1.25165	0	0	0
41898	chr3	GRMZM2G114617	GRMZM2G114617	1253	2	2	3	4	1.25165	0	0	0
42140	chr3	GRMZM2G124658	GRMZM2G124658	700	2	2	3	4	1.25165	0	0	0
42250	chr3	GRMZM2G130333	GRMZM2G130333	2025	2	2	3	4	1.25165	0	0	0
42306	chr3	GRMZM2G132693	GRMZM2G132693	1197	2	2	3	4	1.25165	0	0	0
43002	chr3	GRMZM2G162754	GRMZM2G162754	686	2	2	3	4	1.25165	0	0	0
43388	chr3	GRMZM2G180718	GRMZM2G180718	915	2	2	3	4	1.25165	0	0	0
43400	chr3	GRMZM2G181086	GRMZM2G181086	786	2	2	3	4	1.25165	0	0	0
43584	chr3	GRMZM2G314954	GRMZM2G314954	2490	2	2	3	4	1.25165	0	0	0
43856	chr3	GRMZM2G339553	GRMZM2G339553	1141	2	2	3	4	1.25165	0	0	0
44193	chr3	GRMZM2G368328	GRMZM2G368328	1134	2	2	3	4	1.25165	0	0	0
44259	chr3	GRMZM2G372881	GRMZM2G372881	831	2	2	3	4	1.25165	0	0	0
44519	chr3	GRMZM2G400390	GRMZM2G400390	1749	2	2	3	4	1.25165	0	0	0
44781	chr3	GRMZM2G427526	GRMZM2G427526	435	2	2	3	4	1.25165	0	0	0
44882	chr3	GRMZM2G436020	GRMZM2G436020	450	2	2	3	4	1.25165	0	0	0
44924	chr3	GRMZM2G440020	GRMZM2G440020	492	2	2	3	4	1.25165	0	0	0
45252	chr3	GRMZM2G471367	GRMZM2G471367	915	2	2	3	4	1.25165	0	0	0
45377	chr3	GRMZM2G482732	GRMZM2G482732	940	2	2	3	4	1.25165	0	0	0
45822	chr3	GRMZM2G502124	GRMZM2G502124	176	2	2	3	4	1.25165	0	0	0
45901	chr3	GRMZM2G505498	GRMZM2G505498	107	2	2	3	4	1.25165	0	0	0
46492	chr3	GRMZM2G528057	GRMZM2G528057	107	2	2	3	4	1.25165	0	0	0
47969	chr3	GRMZM2G591145	GRMZM2G591145	429	2	2	3	4	1.25165	0	0	0
48076	chr3	GRMZM2G701950	GRMZM2G701950	2463	2	2	3	4	1.25165	0	0	0
48115	chr3	GRMZM2G702275	GRMZM2G702275	1134	2	2	3	4	1.25165	0	0	0
48206	chr3	GRMZM5G807582	GRMZM5G807582	903	2	2	3	4	1.25165	0	0	0
48362	chr3	GRMZM5G821973	GRMZM5G821973	756	2	2	3	4	1.25165	0	0	0
48480	chr3	GRMZM5G832400	GRMZM5G832400	438	2	2	3	4	1.25165	0	0	0
48728	chr3	GRMZM5G852008	GRMZM5G852008	246	2	2	3	4	1.25165	0	0	0
48749	chr3	GRMZM5G853489	GRMZM5G853489	897	2	2	3	4	1.25165	0	0	0
48777	chr3	GRMZM5G856301	GRMZM5G856301	526	2	2	3	4	1.25165	0	0	0
49123	chr3	orf99-e	GRMZM5G887071	300	2	2	3	4	1.25165	0	0	0
49155	chr3	GRMZM5G889606	GRMZM5G889606	748	2	2	3	4	1.25165	0	0	0
50080	chr4	AC200293.4_FG002	AC200293.4_FG002	291	2	2	3	4	1.25165	0	0	0
50194	chr4	AC204278.2_FG012	AC204278.2_FG012	483	2	2	3	4	1.25165	0	0	0
50210	chr4	AC204570.2_FG008	AC204570.2_FG008	375	2	2	3	4	1.25165	0	0	0
50283	chr4	AC205324.3_FG003	AC205324.3_FG003	2049	2	2	3	4	1.25165	0	0	0
50376	chr4	AC206160.3_FG003	AC206160.3_FG003	294	2	2	3	4	1.25165	0	0	0
50460	chr4	AC208616.3_FG002	AC208616.3_FG002	216	2	2	3	4	1.25165	0	0	0
50546	chr4	AC210863.3_FG002	AC210863.3_FG002	405	2	2	3	4	1.25165	0	0	0
50786	chr4	AC226552.2_FG002	AC226552.2_FG002	417	2	2	3	4	1.25165	0	0	0
50837	chr4	GRMZM2G000520	GRMZM2G000520	1458	2	2	3	4	1.25165	0	0	0
51020	chr4	GRMZM2G007614	GRMZM2G007614	497	2	2	3	4	1.25165	0	0	0
51101	chr4	GRMZM2G010333	GRMZM2G010333	600	2	2	3	4	1.25165	0	0	0
51840	chr4	GRMZM2G040548	GRMZM2G040548	1056	2	2	3	4	1.25165	0	0	0
51914	chr4	GRMZM2G043214	GRMZM2G043214	312	2	2	3	4	1.25165	0	0	0
52153	chr4	GRMZM2G052882	GRMZM2G052882	663	2	2	3	4	1.25165	0	0	0
52199	chr4	GRMZM2G054142	GRMZM2G054142	843	2	2	3	4	1.25165	0	0	0
52284	chr4	GRMZM2G057658	GRMZM2G057658	856	2	2	3	4	1.25165	0	0	0
52299	chr4	GRMZM2G058370	GRMZM2G058370	619	2	2	3	4	1.25165	0	0	0
52356	chr4	GRMZM2G060377	GRMZM2G060377	461	2	2	3	4	1.25165	0	0	0
52630	chr4	GRMZM2G071030	GRMZM2G071030	446	2	2	3	4	1.25165	0	0	0
52940	chr4	GRMZM2G081752	GRMZM2G081752	541	2	2	3	4	1.25165	0	0	0
52952	chr4	GRMZM2G082082	GRMZM2G082082	610	2	2	3	4	1.25165	0	0	0
53077	chr4	GRMZM2G088228	GRMZM2G088228	436	2	2	3	4	1.25165	0	0	0
53433	chr4	GRMZM2G102010	GRMZM2G102010	554	2	2	3	4	1.25165	0	0	0
53780	chr4	GRMZM2G113754	GRMZM2G113754	180	2	2	3	4	1.25165	0	0	0
53893	chr4	GRMZM2G118754	GRMZM2G118754	446	2	2	3	4	1.25165	0	0	0
53997	chr4	GRMZM2G122498	GRMZM2G122498	1800	2	2	3	4	1.25165	0	0	0
54214	chr4	GRMZM2G129688	GRMZM2G129688	622	2	2	3	4	1.25165	0	0	0
54266	chr4	GRMZM2G132363	GRMZM2G132363	460	2	2	3	4	1.25165	0	0	0
54470	chr4	GRMZM2G139761	GRMZM2G139761	296	2	2	3	4	1.25165	0	0	0
55056	chr4	GRMZM2G161980	GRMZM2G161980	301	2	2	3	4	1.25165	0	0	0
55119	chr4	GRMZM2G164098	GRMZM2G164098	532	2	2	3	4	1.25165	0	0	0
55155	chr4	GRMZM2G165248	GRMZM2G165248	510	2	2	3	4	1.25165	0	0	0
55204	chr4	GRMZM2G166726	GRMZM2G166726	798	2	2	3	4	1.25165	0	0	0
55595	chr4	GRMZM2G300953	GRMZM2G300953	333	2	2	3	4	1.25165	0	0	0
55596	chr4	GRMZM2G301145	GRMZM2G301145	1564	2	2	3	4	1.25165	0	0	0
55597	chr4	GRMZM2G301148	GRMZM2G301148	1428	2	2	3	4	1.25165	0	0	0
55685	chr4	GRMZM2G307749	GRMZM2G307749	600	2	2	3	4	1.25165	0	0	0
56087	chr4	GRMZM2G342691	GRMZM2G342691	1122	2	2	3	4	1.25165	0	0	0
56238	chr4	GRMZM2G356087	GRMZM2G356087	858	2	2	3	4	1.25165	0	0	0
56399	chr4	GRMZM2G370924	GRMZM2G370924	2393	2	2	3	4	1.25165	0	0	0
56406	chr4	GRMZM2G372171	GRMZM2G372171	1456	2	2	3	4	1.25165	0	0	0
56598	chr4	GRMZM2G389342	GRMZM2G389342	1175	2	2	3	4	1.25165	0	0	0
56659	chr4	GRMZM2G394747	GRMZM2G394747	921	2	2	3	4	1.25165	0	0	0
56712	chr4	GRMZM2G399050	GRMZM2G399050	2091	2	2	3	4	1.25165	0	0	0
57268	chr4	GRMZM2G453766	GRMZM2G453766	783	2	2	3	4	1.25165	0	0	0
57422	chr4	GRMZM2G467703	GRMZM2G467703	2714	2	2	3	4	1.25165	0	0	0
57460	chr4	GRMZM2G471525	GRMZM2G471525	1569	2	2	3	4	1.25165	0	0	0
57532	chr4	GRMZM2G476515	GRMZM2G476515	609	2	2	3	4	1.25165	0	0	0
57872	chr4	GRMZM2G492492	GRMZM2G492492	440	2	2	3	4	1.25165	0	0	0
58098	chr4	GRMZM2G501303	GRMZM2G501303	194	2	2	3	4	1.25165	0	0	0
58272	chr4	GRMZM2G507830	GRMZM2G507830	810	2	2	3	4	1.25165	0	0	0
59517	chr4	GRMZM2G551108	GRMZM2G551108	1353	2	2	3	4	1.25165	0	0	0
59767	chr4	GRMZM2G559827	GRMZM2G559827	81	2	2	3	4	1.25165	0	0	0
60007	chr4	GRMZM2G569774	GRMZM2G569774	814	2	2	3	4	1.25165	0	0	0
61037	chr4	GRMZM5G826955	GRMZM5G826955	370	2	2	3	4	1.25165	0	0	0
61138	chr4	GRMZM5G836219	GRMZM5G836219	241	2	2	3	4	1.25165	0	0	0
61397	chr4	GRMZM5G861332	GRMZM5G861332	226	2	2	3	4	1.25165	0	0	0
61502	chr4	GRMZM5G871484	GRMZM5G871484	450	2	2	3	4	1.25165	0	0	0
61633	chr4	GRMZM5G884985	GRMZM5G884985	1767	2	2	3	4	1.25165	0	0	0
61655	chr4	GRMZM5G886348	GRMZM5G886348	798	2	2	3	4	1.25165	0	0	0
61673	chr4	GRMZM5G888445	GRMZM5G888445	258	2	2	3	4	1.25165	0	0	0
61937	chr5	AC186565.3_FG002	AC186565.3_FG002	282	2	2	3	4	1.25165	0	0	0
61949	chr5	AC188134.2_FG011	AC188134.2_FG011	723	2	2	3	4	1.25165	0	0	0
61982	chr5	AC190813.3_FG011	AC190813.3_FG011	381	2	2	3	4	1.25165	0	0	0
62171	chr5	AC195685.3_FG001	AC195685.3_FG001	1032	2	2	3	4	1.25165	0	0	0
62264	chr5	AC197125.2_FG005	AC197125.2_FG005	525	2	2	3	4	1.25165	0	0	0
62279	chr5	AC197498.3_FG002	AC197498.3_FG002	465	2	2	3	4	1.25165	0	0	0
62369	chr5	AC201991.3_FG004	AC201991.3_FG004	378	2	2	3	4	1.25165	0	0	0
62770	chr5	AC210058.3_FG005	AC210058.3_FG005	636	2	2	3	4	1.25165	0	0	0
62813	chr5	AC210997.5_FG014	AC210997.5_FG014	525	2	2	3	4	1.25165	0	0	0
62946	chr5	AC213463.3_FG009	AC213463.3_FG009	1899	2	2	3	4	1.25165	0	0	0
63096	chr5	AC217291.3_FG003	AC217291.3_FG003	336	2	2	3	4	1.25165	0	0	0
63126	chr5	AC219022.3_FG004	AC219022.3_FG004	384	2	2	3	4	1.25165	0	0	0
63302	chr5	GRMZM2G003109	GRMZM2G003109	1966	2	2	3	4	1.25165	0	0	0
63406	chr5	GRMZM2G008296	GRMZM2G008296	744	2	2	3	4	1.25165	0	0	0
63444	chr5	GRMZM2G010048	GRMZM2G010048	946	2	2	3	4	1.25165	0	0	0
63712	chr5	GRMZM2G020329	GRMZM2G020329	708	2	2	3	4	1.25165	0	0	0
63747	chr5	GRMZM2G021514	GRMZM2G021514	1728	3	4	6	6	1.25165	0	0	0
64096	chr5	GRMZM2G037146	GRMZM2G037146	1514	2	2	3	4	1.25165	0	0	0
64113	chr5	GRMZM2G037700	GRMZM2G037700	954	2	2	3	4	1.25165	0	0	0
64754	chr5	GRMZM2G065664	GRMZM2G065664	326	2	2	3	4	1.25165	0	0	0
64982	chr5	GRMZM2G074826	GRMZM2G074826	657	2	2	3	4	1.25165	0	0	0
65218	chr5	GRMZM2G083741	GRMZM2G083741	480	2	2	3	4	1.25165	0	0	0
65333	chr5	GRMZM2G087893	GRMZM2G087893	712	2	2	3	4	1.25165	0	0	0
65482	chr5	GRMZM2G092835	GRMZM2G092835	782	2	2	3	4	1.25165	0	0	0
65903	chr5	GRMZM2G109959	GRMZM2G109959	790	2	2	3	4	1.25165	0	0	0
65990	chr5	GRMZM2G112499	GRMZM2G112499	1425	2	2	3	4	1.25165	0	0	0
66041	chr5	GRMZM2G113765	GRMZM2G113765	734	2	2	3	4	1.25165	0	0	0
66226	chr5	GRMZM2G121460	GRMZM2G121460	927	2	2	3	4	1.25165	0	0	0
66633	chr5	GRMZM2G136465	GRMZM2G136465	1764	2	2	3	4	1.25165	0	0	0
66820	chr5	GRMZM2G144050	GRMZM2G144050	1931	2	2	3	4	1.25165	0	0	0
67030	chr5	GRMZM2G152796	GRMZM2G152796	1326	2	2	3	4	1.25165	0	0	0
67476	chr5	GRMZM2G170034	GRMZM2G170034	1198	2	2	3	4	1.25165	0	0	0
67923	chr5	GRMZM2G315140	GRMZM2G315140	1371	2	2	3	4	1.25165	0	0	0
67931	chr5	GRMZM2G315879	GRMZM2G315879	588	2	2	3	4	1.25165	0	0	0
67954	chr5	GRMZM2G319000	GRMZM2G319000	792	2	2	3	4	1.25165	0	0	0
68031	chr5	GRMZM2G327260	GRMZM2G327260	878	2	2	3	4	1.25165	0	0	0
68127	chr5	GRMZM2G335928	GRMZM2G335928	484	2	2	3	4	1.25165	0	0	0
68202	chr5	GRMZM2G344544	GRMZM2G344544	930	2	2	3	4	1.25165	0	0	0
68276	chr5	GRMZM2G352099	GRMZM2G352099	774	2	2	3	4	1.25165	0	0	0
68319	chr5	GRMZM2G356748	GRMZM2G356748	1818	2	2	3	4	1.25165	0	0	0
68401	chr5	GRMZM2G364373	GRMZM2G364373	1044	2	2	3	4	1.25165	0	0	0
68482	chr5	GRMZM2G371842	GRMZM2G371842	2241	2	2	3	4	1.25165	0	0	0
68904	chr5	GRMZM2G409372	GRMZM2G409372	1078	2	2	3	4	1.25165	0	0	0
69024	chr5	GRMZM2G419455	GRMZM2G419455	1469	2	2	3	4	1.25165	0	0	0
69025	chr5	GRMZM2G419807	GRMZM2G419807	1113	2	2	3	4	1.25165	0	0	0
69215	chr5	GRMZM2G435004	GRMZM2G435004	475	2	2	3	4	1.25165	0	0	0
69216	chr5	GRMZM2G435438	GRMZM2G435438	1250	2	2	3	4	1.25165	0	0	0
69363	chr5	GRMZM2G454718	GRMZM2G454718	1539	2	2	3	4	1.25165	0	0	0
69407	chr5	GRMZM2G459115	GRMZM2G459115	545	2	2	3	4	1.25165	0	0	0
69535	chr5	GRMZM2G468614	GRMZM2G468614	507	2	2	3	4	1.25165	0	0	0
69774	chr5	GRMZM2G487345	GRMZM2G487345	485	2	2	3	4	1.25165	0	0	0
70299	chr5	GRMZM2G511229	GRMZM2G511229	102	2	2	3	4	1.25165	0	0	0
70806	chr5	GRMZM2G532203	GRMZM2G532203	876	2	2	3	4	1.25165	0	0	0
70851	chr5	GRMZM2G534096	GRMZM2G534096	890	2	2	3	4	1.25165	0	0	0
71514	chr5	GRMZM2G558012	GRMZM2G558012	635	2	2	3	4	1.25165	0	0	0
71558	chr5	GRMZM2G559683	GRMZM2G559683	885	2	2	3	4	1.25165	0	0	0
71755	chr5	GRMZM2G568183	GRMZM2G568183	488	2	2	3	4	1.25165	0	0	0
72169	chr5	GRMZM2G585216	GRMZM2G585216	139	2	2	3	4	1.25165	0	0	0
72385	chr5	GRMZM2G701798	GRMZM2G701798	402	2	2	3	4	1.25165	0	0	0
72513	chr5	GRMZM5G804578	GRMZM5G804578	1353	2	2	3	4	1.25165	0	0	0
72611	chr5	GRMZM5G812472	GRMZM5G812472	728	2	2	3	4	1.25165	0	0	0
72848	chr5	GRMZM5G834702	GRMZM5G834702	297	2	2	3	4	1.25165	0	0	0
72900	chr5	GRMZM5G838410	GRMZM5G838410	752	2	2	3	4	1.25165	0	0	0
72912	chr5	GRMZM5G839368	GRMZM5G839368	275	2	2	3	4	1.25165	0	0	0
73557	chr5	GRMZM5G891967	GRMZM5G891967	1245	2	2	3	4	1.25165	0	0	0
73558	chr5	GRMZM5G892137	GRMZM5G892137	338	2	2	3	4	1.25165	0	0	0
73697	chr6	AC187080.3_FG006	AC187080.3_FG006	2790	2	2	3	4	1.25165	0	0	0
74490	chr6	AC210785.3_FG002	AC210785.3_FG002	172	2	2	3	4	1.25165	0	0	0
74544	chr6	AC212225.3_FG002	AC212225.3_FG002	339	2	2	3	4	1.25165	0	0	0
74551	chr6	AC212394.4_FG010	AC212394.4_FG010	1299	2	2	3	4	1.25165	0	0	0
74577	chr6	AC213800.3_FG001	AC213800.3_FG001	702	2	2	3	4	1.25165	0	0	0
74589	chr6	AC213884.3_FG006	AC213884.3_FG006	240	2	2	3	4	1.25165	0	0	0
74726	chr6	AC233871.1_FG005	AC233871.1_FG005	924	2	2	3	4	1.25165	0	0	0
74843	chr6	GRMZM2G004790	GRMZM2G004790	342	2	2	3	4	1.25165	0	0	0
75371	chr6	GRMZM2G034958	GRMZM2G034958	1519	2	2	3	4	1.25165	0	0	0
75518	chr6	GRMZM2G042440	GRMZM2G042440	314	2	2	3	4	1.25165	0	0	0
75700	chr6	GRMZM2G051599	GRMZM2G051599	1308	2	2	3	4	1.25165	0	0	0
75910	chr6	GRMZM2G061777	GRMZM2G061777	1799	2	2	3	4	1.25165	0	0	0
76188	chr6	GRMZM2G076140	GRMZM2G076140	641	2	2	3	4	1.25165	0	0	0
76514	chr6	GRMZM2G095025	GRMZM2G095025	1218	2	2	3	4	1.25165	0	0	0
76705	chr6	GRMZM2G103445	GRMZM2G103445	623	2	2	3	4	1.25165	0	0	0
77314	chr6	GRMZM2G135392	GRMZM2G135392	485	2	2	3	4	1.25165	0	0	0
77328	chr6	GRMZM2G136170	GRMZM2G136170	3099	2	2	3	4	1.25165	0	0	0
77363	chr6	GRMZM2G137432	GRMZM2G137432	1142	2	2	3	4	1.25165	0	0	0
77415	chr6	GRMZM2G140315	GRMZM2G140315	576	2	2	3	4	1.25165	0	0	0
78488	chr6	GRMZM2G329195	GRMZM2G329195	1334	2	2	3	4	1.25165	0	0	0
78580	chr6	GRMZM2G339084	GRMZM2G339084	675	2	2	3	4	1.25165	0	0	0
78600	chr6	GRMZM2G341762	GRMZM2G341762	726	2	2	3	4	1.25165	0	0	0
78807	chr6	GRMZM2G367861	GRMZM2G367861	1248	2	2	3	4	1.25165	0	0	0
79013	chr6	GRMZM2G390516	GRMZM2G390516	1121	2	2	3	4	1.25165	0	0	0
79053	chr6	GRMZM2G395467	GRMZM2G395467	606	2	2	3	4	1.25165	0	0	0
79146	chr6	GRMZM2G406331	GRMZM2G406331	2013	2	2	3	4	1.25165	0	0	0
79329	chr6	GRMZM2G429720	GRMZM2G429720	502	2	2	3	4	1.25165	0	0	0
79388	chr6	GRMZM2G435698	GRMZM2G435698	1389	2	2	3	4	1.25165	0	0	0
79389	chr6	GRMZM2G435708	GRMZM2G435708	288	2	2	3	4	1.25165	0	0	0
79422	chr6	GRMZM2G440283	GRMZM2G440283	1254	2	2	3	4	1.25165	0	0	0
79433	chr6	GRMZM2G440913	GRMZM2G440913	1421	2	2	3	4	1.25165	0	0	0
79469	chr6	GRMZM2G444383	GRMZM2G444383	711	2	2	3	4	1.25165	0	0	0
79554	chr6	GRMZM2G453571	GRMZM2G453571	1482	2	2	3	4	1.25165	0	0	0
80141	chr6	GRMZM2G500106	GRMZM2G500106	667	2	2	3	4	1.25165	0	0	0
81901	chr6	GRMZM2G700973	GRMZM2G700973	757	2	2	3	4	1.25165	0	0	0
81966	chr6	GRMZM2G701209	GRMZM2G701209	642	2	2	3	4	1.25165	0	0	0
81972	chr6	GRMZM2G701228	GRMZM2G701228	414	2	2	3	4	1.25165	0	0	0
82226	chr6	GRMZM5G827685	GRMZM5G827685	243	3	4	6	6	1.25165	0	0	0
82311	chr6	GRMZM5G836148	GRMZM5G836148	294	2	2	3	4	1.25165	0	0	0
82501	chr6	zma-MIR164c	GRMZM5G857126	270	2	2	3	4	1.25165	0	0	0
82550	chr6	GRMZM5G864074	GRMZM5G864074	642	2	2	3	4	1.25165	0	0	0
83229	chr7	AC197544.3_FG001	AC197544.3_FG001	597	2	2	3	4	1.25165	0	0	0
83384	chr7	AC200202.2_FG003	AC200202.2_FG003	456	2	2	3	4	1.25165	0	0	0
83821	chr7	AC215907.3_FG003	AC215907.3_FG003	516	2	2	3	4	1.25165	0	0	0
84165	chr7	GRMZM2G010640	GRMZM2G010640	1336	2	2	3	4	1.25165	0	0	0
84340	chr7	GRMZM2G019916	GRMZM2G019916	696	2	2	3	4	1.25165	0	0	0
84440	chr7	GRMZM2G026003	GRMZM2G026003	873	2	2	3	4	1.25165	0	0	0
84605	chr7	GRMZM2G034790	GRMZM2G034790	445	2	2	3	4	1.25165	0	0	0
84891	chr7	GRMZM2G051002	GRMZM2G051002	1854	2	2	3	4	1.25165	0	0	0
85168	chr7	GRMZM2G065438	GRMZM2G065438	1406	2	2	3	4	1.25165	0	0	0
85206	chr7	GRMZM2G067150	GRMZM2G067150	1242	2	2	3	4	1.25165	0	0	0
85480	chr7	GRMZM2G081502	GRMZM2G081502	946	2	2	3	4	1.25165	0	0	0
85509	chr7	GRMZM2G082586	GRMZM2G082586	1707	2	2	3	4	1.25165	0	0	0
85587	chr7	GRMZM2G087515	GRMZM2G087515	513	2	2	3	4	1.25165	0	0	0
85592	chr7	GRMZM2G088305	GRMZM2G088305	747	2	2	3	4	1.25165	0	0	0
86011	chr7	GRMZM2G110685	GRMZM2G110685	3292	2	2	3	4	1.25165	0	0	0
86018	chr7	GRMZM2G111281	GRMZM2G111281	745	2	2	3	4	1.25165	0	0	0
86239	chr7	GRMZM2G125867	GRMZM2G125867	1887	2	2	3	4	1.25165	0	0	0
86426	chr7	GRMZM2G135758	GRMZM2G135758	672	2	2	3	4	1.25165	0	0	0
86975	chr7	GRMZM2G165659	GRMZM2G165659	490	2	2	3	4	1.25165	0	0	0
87225	chr7	GRMZM2G180490	GRMZM2G180490	1396	2	2	3	4	1.25165	0	0	0
87468	chr7	GRMZM2G326681	GRMZM2G326681	1140	2	2	3	4	1.25165	0	0	0
87516	chr7	GRMZM2G333042	GRMZM2G333042	995	2	2	3	4	1.25165	0	0	0
87552	chr7	GRMZM2G337534	GRMZM2G337534	838	2	2	3	4	1.25165	0	0	0
88034	chr7	GRMZM2G400817	GRMZM2G400817	768	2	2	3	4	1.25165	0	0	0
88078	chr7	GRMZM2G406340	GRMZM2G406340	1971	2	2	3	4	1.25165	0	0	0
88145	chr7	GRMZM2G414535	GRMZM2G414535	1109	2	2	3	4	1.25165	0	0	0
88264	chr7	GRMZM2G428747	GRMZM2G428747	799	2	2	3	4	1.25165	0	0	0
88274	chr7	GRMZM2G429617	GRMZM2G429617	1391	2	2	3	4	1.25165	0	0	0
88275	chr7	GRMZM2G429634	GRMZM2G429634	954	2	2	3	4	1.25165	0	0	0
88298	chr7	GRMZM2G431642	GRMZM2G431642	634	2	2	3	4	1.25165	0	0	0
88399	chr7	GRMZM2G443829	GRMZM2G443829	2234	2	2	3	4	1.25165	0	0	0
88436	chr7	GRMZM2G446981	GRMZM2G446981	324	2	2	3	4	1.25165	0	0	0
88467	chr7	GRMZM2G450866	GRMZM2G450866	864	2	2	3	4	1.25165	0	0	0
88694	chr7	GRMZM2G481340	GRMZM2G481340	1523	2	2	3	4	1.25165	0	0	0
89316	chr7	GRMZM2G514366	GRMZM2G514366	334	2	2	3	4	1.25165	0	0	0
89841	chr7	GRMZM2G543008	GRMZM2G543008	91	2	2	3	4	1.25165	0	0	0
90858	chr7	GRMZM2G700353	GRMZM2G700353	340	2	2	3	4	1.25165	0	0	0
90902	chr7	GRMZM5G802384	GRMZM5G802384	735	2	2	3	4	1.25165	0	0	0
91019	chr7	GRMZM5G815955	GRMZM5G815955	1938	2	2	3	4	1.25165	0	0	0
91150	chr7	GRMZM5G833799	GRMZM5G833799	189	2	2	3	4	1.25165	0	0	0
91176	chr7	GRMZM5G836962	GRMZM5G836962	285	2	2	3	4	1.25165	0	0	0
91222	chr7	GRMZM5G844133	GRMZM5G844133	838	2	2	3	4	1.25165	0	0	0
91447	chr7	GRMZM5G871314	GRMZM5G871314	855	2	2	3	4	1.25165	0	0	0
91624	chr7	GRMZM5G892926	GRMZM5G892926	745	2	2	3	4	1.25165	0	0	0
91690	chr7	GRMZM5G899928	GRMZM5G899928	1725	2	2	3	4	1.25165	0	0	0
92229	chr8	AC199708.2_FG001	AC199708.2_FG001	816	2	2	3	4	1.25165	0	0	0
92396	chr8	AC203847.3_FG001	AC203847.3_FG001	651	2	2	3	4	1.25165	0	0	0
92440	chr8	AC204502.4_FG006	AC204502.4_FG006	1086	2	2	3	4	1.25165	0	0	0
92843	chr8	AC234149.1_FG002	AC234149.1_FG002	852	2	2	3	4	1.25165	0	0	0
93033	chr8	GRMZM2G006734	GRMZM2G006734	1044	2	2	3	4	1.25165	0	0	0
93175	chr8	GRMZM2G014284	GRMZM2G014284	1782	2	2	3	4	1.25165	0	0	0
93261	chr8	GRMZM2G019591	GRMZM2G019591	234	2	2	3	4	1.25165	0	0	0
93352	chr8	GRMZM2G023999	GRMZM2G023999	2129	2	2	3	4	1.25165	0	0	0
93364	chr8	GRMZM2G024674	GRMZM2G024674	737	2	2	3	4	1.25165	0	0	0
93393	chr8	GRMZM2G025608	GRMZM2G025608	461	2	2	3	4	1.25165	0	0	0
93461	chr8	GRMZM2G028812	GRMZM2G028812	3198	2	2	3	4	1.25165	0	0	0
93590	chr8	GRMZM2G034233	GRMZM2G034233	194	2	2	3	4	1.25165	0	0	0
93847	chr8	GRMZM2G048955	GRMZM2G048955	309	2	2	3	4	1.25165	0	0	0
93918	chr8	GRMZM2G051765	GRMZM2G051765	1844	2	2	3	4	1.25165	0	0	0
93946	chr8	GRMZM2G053394	GRMZM2G053394	1338	2	2	3	4	1.25165	0	0	0
94107	chr8	GRMZM2G061354	GRMZM2G061354	846	2	2	3	4	1.25165	0	0	0
94179	chr8	GRMZM2G064933	GRMZM2G064933	1761	2	2	3	4	1.25165	0	0	0
94564	chr8	GRMZM2G083875	GRMZM2G083875	1077	2	2	3	4	1.25165	0	0	0
94779	chr8	GRMZM2G094304	GRMZM2G094304	1673	2	2	3	4	1.25165	0	0	0
94889	chr8	GRMZM2G098443	GRMZM2G098443	867	2	2	3	4	1.25165	0	0	0
95049	chr8	GRMZM2G108518	GRMZM2G108518	738	2	2	3	4	1.25165	0	0	0
95341	chr8	GRMZM2G122727	GRMZM2G122727	1341	2	2	3	4	1.25165	0	0	0
95488	chr8	GRMZM2G129843	GRMZM2G129843	582	2	2	3	4	1.25165	0	0	0
95495	chr8	GRMZM2G130569	GRMZM2G130569	464	2	2	3	4	1.25165	0	0	0
95812	chr8	GRMZM2G145632	GRMZM2G145632	1666	2	2	3	4	1.25165	0	0	0
95866	chr8	GRMZM2G148783	GRMZM2G148783	2530	2	2	3	4	1.25165	0	0	0
95991	chr8	GRMZM2G155091	GRMZM2G155091	450	2	2	3	4	1.25165	0	0	0
96431	chr8	GRMZM2G175398	GRMZM2G175398	2242	2	2	3	4	1.25165	0	0	0
96470	chr8	GRMZM2G178697	GRMZM2G178697	482	2	2	3	4	1.25165	0	0	0
97046	chr8	GRMZM2G359020	GRMZM2G359020	673	2	2	3	4	1.25165	0	0	0
97125	chr8	GRMZM2G367725	GRMZM2G367725	636	2	2	3	4	1.25165	0	0	0
97364	chr8	GRMZM2G390911	GRMZM2G390911	808	2	2	3	4	1.25165	0	0	0
97453	chr8	GRMZM2G402211	GRMZM2G402211	1481	2	2	3	4	1.25165	0	0	0
97480	chr8	GRMZM2G406177	GRMZM2G406177	1984	2	2	3	4	1.25165	0	0	0
97622	chr8	GRMZM2G424682	GRMZM2G424682	379	2	2	3	4	1.25165	0	0	0
97730	chr8	GRMZM2G438355	GRMZM2G438355	363	2	2	3	4	1.25165	0	0	0
97745	chr8	GRMZM2G439365	GRMZM2G439365	594	2	2	3	4	1.25165	0	0	0
97919	chr8	GRMZM2G461027	GRMZM2G461027	309	2	2	3	4	1.25165	0	0	0
98714	chr8	GRMZM2G512369	GRMZM2G512369	358	2	2	3	4	1.25165	0	0	0
98748	chr8	GRMZM2G513737	GRMZM2G513737	1216	3	4	6	6	1.25165	0	0	0
99486	chr8	GRMZM2G550073	GRMZM2G550073	622	2	2	3	4	1.25165	0	0	0
100140	chr8	GRMZM2G583474	GRMZM2G583474	552	2	2	3	4	1.25165	0	0	0
100408	chr8	GRMZM2G700727	GRMZM2G700727	462	2	2	3	4	1.25165	0	0	0
100494	chr8	GRMZM5G806430	GRMZM5G806430	642	2	2	3	4	1.25165	0	0	0
100581	chr8	GRMZM5G816602	GRMZM5G816602	242	2	2	3	4	1.25165	0	0	0
100682	chr8	GRMZM5G827708	GRMZM5G827708	996	2	2	3	4	1.25165	0	0	0
101389	chr9	AC187809.3_FG006	AC187809.3_FG006	408	2	2	3	4	1.25165	0	0	0
101664	chr9	AC198234.4_FG002	AC198234.4_FG002	597	2	2	3	4	1.25165	0	0	0
101722	chr9	AC202184.3_FG004	AC202184.3_FG004	1416	2	2	3	4	1.25165	0	0	0
101899	chr9	AC207667.3_FG001	AC207667.3_FG001	396	2	2	3	4	1.25165	0	0	0
102135	chr9	AC214770.4_FG004	AC214770.4_FG004	516	2	2	3	4	1.25165	0	0	0
102234	chr9	AC220062.3_FG004	AC220062.3_FG004	300	2	2	3	4	1.25165	0	0	0
102386	chr9	GRMZM2G003738	GRMZM2G003738	1114	2	2	3	4	1.25165	0	0	0
102559	chr9	GRMZM2G012716	GRMZM2G012716	606	2	2	3	4	1.25165	0	0	0
102613	chr9	GRMZM2G015590	GRMZM2G015590	870	2	2	3	4	1.25165	0	0	0
102731	chr9	GRMZM2G024182	GRMZM2G024182	424	2	2	3	4	1.25165	0	0	0
102840	chr9	GRMZM2G029735	GRMZM2G029735	922	2	2	3	4	1.25165	0	0	0
102954	chr9	GRMZM2G035531	GRMZM2G035531	871	2	2	3	4	1.25165	0	0	0
103424	chr9	GRMZM2G061926	GRMZM2G061926	371	2	2	3	4	1.25165	0	0	0
103547	chr9	GRMZM2G069681	GRMZM2G069681	599	2	2	3	4	1.25165	0	0	0
103584	chr9	GRMZM2G071750	GRMZM2G071750	485	2	2	3	4	1.25165	0	0	0
104055	chr9	GRMZM2G099316	GRMZM2G099316	430	2	2	3	4	1.25165	0	0	0
104261	chr9	GRMZM2G109454	GRMZM2G109454	2022	2	2	3	4	1.25165	0	0	0
104328	chr9	GRMZM2G111711	GRMZM2G111711	1321	2	2	3	4	1.25165	0	0	0
104369	chr9	GRMZM2G113883	GRMZM2G113883	705	2	2	3	4	1.25165	0	0	0
104580	chr9	GRMZM2G126810	GRMZM2G126810	709	2	2	3	4	1.25165	0	0	0
104668	chr9	GRMZM2G131735	GRMZM2G131735	930	2	2	3	4	1.25165	0	0	0
104773	chr9	GRMZM2G137869	GRMZM2G137869	1109	2	2	3	4	1.25165	0	0	0
104898	chr9	GRMZM2G145294	GRMZM2G145294	587	2	2	3	4	1.25165	0	0	0
105001	chr9	GRMZM2G149803	GRMZM2G149803	1683	2	2	3	4	1.25165	0	0	0
105279	chr9	GRMZM2G166475	GRMZM2G166475	509	2	2	3	4	1.25165	0	0	0
105334	chr9	GRMZM2G169350	GRMZM2G169350	278	2	2	3	4	1.25165	0	0	0
105397	chr9	GRMZM2G173361	GRMZM2G173361	665	2	2	3	4	1.25165	0	0	0
105415	chr9	GRMZM2G174080	GRMZM2G174080	664	2	2	3	4	1.25165	0	0	0
105575	chr9	GRMZM2G303746	GRMZM2G303746	711	2	2	3	4	1.25165	0	0	0
105794	chr9	GRMZM2G329584	GRMZM2G329584	855	2	2	3	4	1.25165	0	0	0
105810	chr9	GRMZM2G330883	GRMZM2G330883	324	2	2	3	4	1.25165	0	0	0
105951	chr9	GRMZM2G350931	GRMZM2G350931	711	2	2	3	4	1.25165	0	0	0
106016	chr9	GRMZM2G359305	GRMZM2G359305	1066	2	2	3	4	1.25165	0	0	0
106058	chr9	GRMZM2G365912	GRMZM2G365912	756	2	2	3	4	1.25165	0	0	0
106136	chr9	GRMZM2G376705	GRMZM2G376705	486	2	2	3	4	1.25165	0	0	0
106182	chr9	GRMZM2G382481	GRMZM2G382481	636	2	2	3	4	1.25165	0	0	0
106910	chr9	GRMZM2G475710	GRMZM2G475710	459	2	2	3	4	1.25165	0	0	0
108058	chr9	GRMZM2G540708	GRMZM2G540708	330	2	2	3	4	1.25165	0	0	0
109101	chr9	GRMZM2G704456	GRMZM2G704456	767	2	2	3	4	1.25165	0	0	0
109224	chr9	GRMZM5G812793	GRMZM5G812793	207	2	2	3	4	1.25165	0	0	0
109256	chr9	GRMZM5G816850	GRMZM5G816850	513	2	2	3	4	1.25165	0	0	0
109803	chr9	GRMZM5G876802	GRMZM5G876802	150	2	2	3	4	1.25165	0	0	0
13335	chr1	GRMZM2G096401	GRMZM2G096401	1168	5	5	3	2	1.25166	0	0	0
42567	chr3	GRMZM2G143579	GRMZM2G143579	527	5	5	3	2	1.25166	0	0	0
76462	chr6	GRMZM2G092802	GRMZM2G092802	762	5	5	3	2	1.25166	0	0	0
88474	chr7	GRMZM2G451910	GRMZM2G451910	2385	5	5	3	2	1.25166	0	0	0
107897	chr9	GRMZM2G532084	GRMZM2G532084	220	5	5	3	2	1.25166	0	0	0
85792	chr7	GRMZM2G100043	GRMZM2G100043	2266	93	136	186	352	1.25167	0	0	0
104125	chr9	GRMZM2G103103	GRMZM2G103103	1534	10	16	7	4	1.25168	0	0	0
75859	chr6	GRMZM2G060000	GRMZM2G060000	1588	5	5	24	73	1.25168	0	0	0
48613	chr3	GRMZM5G843793	GRMZM5G843793	537	30	43	15	7	1.25168	0	0	0
82453	chr6	GRMZM5G850879	GRMZM5G850879	1548	38	56	120	71	1.25169	0	0	0
63997	chr5	GRMZM2G032130	GRMZM2G032130	2478	3	2	8	19	1.25169	0	0	0
45543	chr3	GRMZM2G490920	GRMZM2G490920	311	18	11	31	56	1.25169	0	0	0
31768	chr2	GRMZM2G364597	GRMZM2G364597	2638	358	1839	721	480	1.25169	0	0	0
84058	chr7	GRMZM2G005732	GRMZM2G005732	4193	661	48	439	983	1.2517	0	0	0
15225	chr1	GRMZM2G152552	GRMZM2G152552	1964	324	373	204	130	1.25172	0	0	0
44985	chr3	GRMZM2G446225	GRMZM2G446225	1286	42	20	24	22	1.25173	0	0	0
41843	chr3	GRMZM2G112013	GRMZM2G112013	690	11	2	8	13	1.25173	0	0	0
41286	chr3	GRMZM2G086832	GRMZM2G086832	1182	2	2	7	17	1.25176	0	0	0
41693	chr3	GRMZM2G105140	GRMZM2G105140	1282	2	2	7	17	1.25176	0	0	0
52138	chr4	GRMZM2G051994	GRMZM2G051994	2157	2	2	7	17	1.25176	0	0	0
68211	chr5	GRMZM2G345120	GRMZM2G345120	1041	2	2	7	17	1.25176	0	0	0
94044	chr8	GRMZM2G058690	GRMZM2G058690	2165	2	2	7	17	1.25176	0	0	0
106889	chr9	GRMZM2G473274	GRMZM2G473274	1098	2	2	7	17	1.25176	0	0	0
68577	chr5	GRMZM2G380291	GRMZM2G380291	3072	2	4	13	8	1.25176	0	0	0
18612	chr1	GRMZM2G463318	GRMZM2G463318	673	3808	1353	2183	2265	1.25176	0	0	0
27121	chr2	GRMZM2G042893	GRMZM2G042893	1996	7	15	44	44	1.25176	0	0	0
53156	chr4	GRMZM2G091039	GRMZM2G091039	634	5	2	4	5	1.25179	0	0	0
55847	chr4	GRMZM2G318958	GRMZM2G318958	1601	4	5	10	4	1.25179	0	0	0
71059	chr5	GRMZM2G541360	GRMZM2G541360	296	5	2	4	5	1.25179	0	0	0
86461	chr7	GRMZM2G136794	GRMZM2G136794	1988	103	236	610	1044	1.25181	0	0	0
80881	chr6	GRMZM2G540696	GRMZM2G540696	105	9	3	10	17	1.25182	0	0	0
66686	chr5	GRMZM2G138423	GRMZM2G138423	2287	41	21	57	95	1.25182	0	0	0
57001	chr4	GRMZM2G426888	GRMZM2G426888	2099	426	278	116	434	1.25184	0	0	0
14447	chr1	GRMZM2G127546	GRMZM2G127546	1768	844	907	1446	2054	1.25184	0	0	0
85877	chr7	GRMZM2G104325	GRMZM2G104325	3579	22692	2935	6912	6962	1.25184	0	0	0
102407	chr9	mips2	GRMZM2G004528	2542	38062	17827	25262	25883	1.25187	0	0	0
63140	chr5	AC220927.3_FG007	AC220927.3_FG007	945	2	4	6	37	1.25187	0	0	0
12427	chr1	GRMZM2G070211	GRMZM2G070211	1889	101	277	271	327	1.25187	0	0	0
26184	chr2	GRMZM2G009344	GRMZM2G009344	2554	719	123	478	744	1.25187	0	0	0
4102	chr10	GRMZM2G303639	GRMZM2G303639	1331	510	160	396	535	1.25188	0	0	0
31231	chr2	GRMZM2G321262	GRMZM2G321262	404	4	3	6	9	1.2519	0	0	0
36701	chr2	GRMZM5G824551	GRMZM5G824551	609	6	3	4	4	1.2519	0	0	0
66806	chr5	GRMZM2G143852	GRMZM2G143852	499	6	3	4	4	1.2519	0	0	0
66991	chr5	GRMZM2G151237	GRMZM2G151237	1948	16	25	45	50	1.2519	0	0	0
64611	chr5	GRMZM2G059671	GRMZM2G059671	3486	28	11	31	49	1.25191	0	0	0
23615	chr1	GRMZM5G852177	GRMZM5G852177	1630	4	10	44	164	1.25192	0	0	0
68142	chr5	GRMZM2G336858	GRMZM2G336858	1877	163	128	243	356	1.25193	0	0	0
104180	chr9	GRMZM2G105192	GRMZM2G105192	2525	78	41	109	180	1.25194	0	0	0
71991	chr5	GRMZM2G579203	GRMZM2G579203	713	34	8	11	9	1.25197	0	0	0
75560	chr6	GRMZM2G044442	GRMZM2G044442	2298	20	34	60	88	1.25199	0	0	0
57153	chr4	GRMZM2G443637	GRMZM2G443637	2001	784	2398	11324	12236	1.25201	0	0	0
40145	chr3	CBL5	GRMZM2G041729	1754	21	8	18	24	1.25202	0	0	0
26011	chr2	GRMZM2G003331	GRMZM2G003331	2337	30	23	41	57	1.25202	0	0	0
4612	chr10	GRMZM2G376305	GRMZM2G376305	567	2	9	70	85	1.25202	0	0	0
27224	chr2	GRMZM2G046201	GRMZM2G046201	2978	3	3	2	10	1.25204	0	0	0
96751	chr8	GRMZM2G324727	GRMZM2G324727	1725	3	3	2	10	1.25204	0	0	0
85475	chr7	GRMZM2G081048	GRMZM2G081048	3251	71	113	151	209	1.25205	0	0	0
29252	chr2	GRMZM2G119272	GRMZM2G119272	1274	187	521	311	253	1.25207	0	0	0
7737	chr10	GRMZM5G869572	GRMZM5G869572	950	73	35	49	50	1.25207	0	0	0
77764	chr6	GRMZM2G156916	GRMZM2G156916	1989	38	55	114	70	1.25207	0	0	0
25724	chr2	AC215723.3_FG001	AC215723.3_FG001	900	2	5	8	14	1.25208	0	0	0
13434	chr1	GRMZM2G099467	GRMZM2G099467	1617	22	61	252	270	1.2521	0	0	0
12357	chr1	GRMZM2G068577	GRMZM2G068577	1110	2	3	9	22	1.2521	0	0	0
76701	chr6	GRMZM2G103266	GRMZM2G103266	2902	83	109	170	252	1.25211	0	0	0
39948	chr3	GRMZM2G033867	GRMZM2G033867	1540	291	47	101	101	1.25211	0	0	0
63824	chr5	GRMZM2G025164	GRMZM2G025164	2326	171	91	220	340	1.25212	0	0	0
26599	chr2	GRMZM2G023254	GRMZM2G023254	461	11	8	4	13	1.25213	0	0	0
98861	chr8	GRMZM2G519229	GRMZM2G519229	1378	22	12	5	8	1.25213	0	0	0
32301	chr2	GRMZM2G408216	GRMZM2G408216	1752	3	2	7	15	1.25214	0	0	0
69502	chr5	GRMZM2G465957	GRMZM2G465957	1134	3	2	7	15	1.25214	0	0	0
26573	chr2	GRMZM2G022829	GRMZM2G022829	856	6	3	8	13	1.25214	0	0	0
56718	chr4	GRMZM2G399677	GRMZM2G399677	3549	152	95	184	255	1.25215	0	0	0
29240	chr2	GRMZM2G118950	GRMZM2G118950	1812	36	3	26	57	1.25215	0	0	0
92962	chr8	GRMZM2G004040	GRMZM2G004040	3081	171	216	561	1177	1.25216	0	0	0
10775	chr1	GRMZM2G022715	GRMZM2G022715	573	2	2	6	13	1.25217	0	0	0
14498	chr1	GRMZM2G129413	GRMZM2G129413	2177	2	2	6	13	1.25217	0	0	0
37318	chr2	GRMZM5G875702	GRMZM5G875702	441	2	2	6	13	1.25217	0	0	0
40229	chr3	GRMZM2G045215	GRMZM2G045215	1551	2	2	6	13	1.25217	0	0	0
42990	chr3	GRMZM2G162364	GRMZM2G162364	1210	2	2	6	13	1.25217	0	0	0
43263	chr3	GRMZM2G175444	GRMZM2G175444	913	2	2	6	13	1.25217	0	0	0
45315	chr3	GRMZM2G477203	GRMZM2G477203	1482	2	2	6	13	1.25217	0	0	0
57416	chr4	GRMZM2G466574	GRMZM2G466574	567	2	2	6	13	1.25217	0	0	0
57494	chr4	GRMZM2G473204	GRMZM2G473204	1052	2	2	6	13	1.25217	0	0	0
74579	chr6	AC213829.2_FG005	AC213829.2_FG005	504	2	2	6	13	1.25217	0	0	0
93003	chr8	GRMZM2G005554	GRMZM2G005554	898	2	2	6	13	1.25217	0	0	0
13089	chr1	GRMZM2G089266	GRMZM2G089266	464	3	4	10	3	1.2522	0	0	0
26811	chr2	GRMZM2G031928	GRMZM2G031928	341	9	7	7	3	1.25221	0	0	0
4809	chr10	GRMZM2G405595	GRMZM2G405595	912	2	5	5	6	1.25223	0	0	0
14923	chr1	GRMZM2G142962	GRMZM2G142962	1871	2	5	5	6	1.25223	0	0	0
29133	chr2	GRMZM2G113658	GRMZM2G113658	582	2	5	5	6	1.25223	0	0	0
51142	chr4	GRMZM2G011775	GRMZM2G011775	829	2	5	5	6	1.25223	0	0	0
66211	chr5	GRMZM2G120970	GRMZM2G120970	598	2	5	5	6	1.25223	0	0	0
2970	chr10	GRMZM2G113228	GRMZM2G113228	1118	121	135	229	343	1.25225	0	0	0
5151	chr10	GRMZM2G452572	GRMZM2G452572	403	2	4	7	24	1.25226	0	0	0
104474	chr9	GRMZM2G118922	GRMZM2G118922	1243	2	2	16	69	1.25227	0	0	0
75035	chr6	GRMZM2G015432	GRMZM2G015432	3195	72	42	205	532	1.25229	0	0	0
3597	chr10	GRMZM2G153232	GRMZM2G153232	1551	5	3	10	20	1.25234	0	0	0
94266	chr8	GRMZM2G070369	GRMZM2G070369	795	6	6	10	3	1.25234	0	0	0
14431	chr1	GRMZM2G127370	GRMZM2G127370	3064	102	213	36	10	1.25234	0	0	0
18296	chr1	GRMZM2G445602	GRMZM2G445602	2435	31	135	388	4495	1.25236	0	0	0
85474	chr7	GRMZM2G080871	GRMZM2G080871	2490	66	115	296	206	1.25238	0	0	0
103436	chr9	IBP1	GRMZM2G063151	3023	57	124	283	550	1.25238	0	0	0
52062	chr4	GRMZM2G049127	GRMZM2G049127	2582	497	1585	1200	1206	1.2524	0	0	0
11468	chr1	GRMZM2G042398	GRMZM2G042398	2087	111	161	243	321	1.2524	0	0	0
65363	chr5	GRMZM2G088737	GRMZM2G088737	2343	95	74	144	234	1.25241	0	0	0
41482	chr3	GRMZM2G094428	GRMZM2G094428	1747	7	10	74	335	1.25243	0	0	0
41675	chr3	GRMZM2G104396	GRMZM2G104396	1518	228	87	138	143	1.25244	0	0	0
17259	chr1	GRMZM2G371462	GRMZM2G371462	365	27	6	32	66	1.25245	0	0	0
75709	chr6	GRMZM2G051915	GRMZM2G051915	2330	165	58	92	93	1.25245	0	0	0
4724	chr10	GRMZM2G392691	GRMZM2G392691	867	2	5	4	4	1.2525	0	0	0
9919	chr1	AC233935.1_FG001	AC233935.1_FG001	414	2	5	4	4	1.2525	0	0	0
15601	chr1	GRMZM2G163462	GRMZM2G163462	382	5	5	4	10	1.2525	0	0	0
26128	chr2	GRMZM2G007885	GRMZM2G007885	2849	2	5	4	4	1.2525	0	0	0
32775	chr2	GRMZM2G449094	GRMZM2G449094	1098	2	5	4	4	1.2525	0	0	0
43033	chr3	GRMZM2G163781	GRMZM2G163781	1341	2	5	4	4	1.2525	0	0	0
69471	chr5	GRMZM2G463935	GRMZM2G463935	2147	2	5	4	4	1.2525	0	0	0
88690	chr7	GRMZM2G480480	GRMZM2G480480	4541	2	5	4	4	1.2525	0	0	0
94551	chr8	GRMZM2G083328	GRMZM2G083328	2107	4	10	8	8	1.2525	0	0	0
102869	chr9	GRMZM2G030844	GRMZM2G030844	1421	2	5	4	4	1.2525	0	0	0
36496	chr2	GRMZM5G804931	GRMZM5G804931	2888	3	8	25	46	1.2525	0	0	0
18018	chr1	GRMZM2G425719	GRMZM2G425719	1962	4	4	10	19	1.25251	0	0	0
11626	chr1	GRMZM2G046480	GRMZM2G046480	2462	4	4	8	13	1.25251	0	0	0
78134	chr6	GRMZM2G175860	GRMZM2G175860	1761	3	3	29	142	1.25254	0	0	0
65596	chr5	GRMZM2G097704	GRMZM2G097704	2039	72	33	147	331	1.25256	0	0	0
86345	chr7	GRMZM2G131243	GRMZM2G131243	1897	705	1878	1075	830	1.2526	0	0	0
68459	chr5	GRMZM2G369926	GRMZM2G369926	2111	256	444	807	1255	1.25261	0	0	0
41252	chr3	GRMZM2G085443	GRMZM2G085443	1137	9	3	6	7	1.25265	0	0	0
4746	chr10	GRMZM2G397033	GRMZM2G397033	800	5	2	8	16	1.25267	0	0	0
12840	chr1	GRMZM2G082189	GRMZM2G082189	1174	5	2	8	16	1.25267	0	0	0
10193	chr1	GRMZM2G006293	GRMZM2G006293	1256	62	107	287	178	1.25268	0	0	0
24108	chr1	GRMZM5G885628	GRMZM5G885628	1998	72	87	151	235	1.25269	0	0	0
54048	chr4	GRMZM2G123790	GRMZM2G123790	1458	7	8	13	19	1.25269	0	0	0
14464	chr1	GRMZM2G128206	GRMZM2G128206	2030	47	143	136	162	1.2527	0	0	0
68585	chr5	GRMZM2G381453	GRMZM2G381453	2774	4	8	26	73	1.2527	0	0	0
11463	chr1	GRMZM2G042253	GRMZM2G042253	2296	69	11	49	80	1.25271	0	0	0
12345	chr1	GRMZM2G068265	GRMZM2G068265	597	3	7	4	3	1.25272	0	0	0
17659	chr1	cc6	GRMZM2G401328	805	3	7	4	3	1.25272	0	0	0
32963	chr2	GRMZM2G464528	GRMZM2G464528	393	3	7	4	3	1.25272	0	0	0
91474	chr7	GRMZM5G874260	GRMZM5G874260	2425	2	2	40	324	1.25275	0	0	0
27214	chr2	GRMZM2G045914	GRMZM2G045914	1341	6	27	23	27	1.25278	0	0	0
20737	chr1	GRMZM2G535366	GRMZM2G535366	115	7	4	2	2	1.25278	0	0	0
21331	chr1	GRMZM2G552469	GRMZM2G552469	952	7	4	2	2	1.25278	0	0	0
57262	chr4	GRMZM2G453577	GRMZM2G453577	516	7	4	2	2	1.25278	0	0	0
58080	chr4	GRMZM2G500317	GRMZM2G500317	288	7	4	2	2	1.25278	0	0	0
7609	chr10	GRMZM5G851266	GRMZM5G851266	2172	5	10	34	20	1.25283	0	0	0
1252	chr10	GRMZM2G002542	GRMZM2G002542	1893	2	3	6	11	1.25283	0	0	0
40109	chr3	GRMZM2G039867	GRMZM2G039867	1658	2	3	6	11	1.25283	0	0	0
69492	chr5	GRMZM2G465714	GRMZM2G465714	1459	2	3	6	11	1.25283	0	0	0
51216	chr4	GRMZM2G014356	GRMZM2G014356	1232	40	17	62	118	1.25284	0	0	0
96035	chr8	GRMZM2G157589	GRMZM2G157589	2180	49	39	72	103	1.2529	0	0	0
77430	chr6	GRMZM2G140817	GRMZM2G140817	1879	7	10	45	143	1.25291	0	0	0
39597	chr3	GRMZM2G020002	GRMZM2G020002	2546	70	42	112	190	1.25291	0	0	0
94082	chr8	GRMZM2G060467	GRMZM2G060467	2466	61	36	76	109	1.25293	0	0	0
92889	chr8	GRMZM2G000777	GRMZM2G000777	964	31	44	89	56	1.25293	0	0	0
77409	chr6	GRMZM2G139796	GRMZM2G139796	963	6	2	7	12	1.25295	0	0	0
67126	chr5	GRMZM2G157336	GRMZM2G157336	498	2	2	8	21	1.25299	0	0	0
7357	chr10	GRMZM5G814035	GRMZM5G814035	751	4	8	20	24	1.25301	0	0	0
18889	chr1	GRMZM2G480698	GRMZM2G480698	1474	2	4	10	12	1.25301	0	0	0
23537	chr1	GRMZM5G846676	GRMZM5G846676	1398	2	4	10	12	1.25301	0	0	0
84310	chr7	GRMZM2G018822	GRMZM2G018822	2840	2	4	10	12	1.25301	0	0	0
84933	chr7	GRMZM2G053223	GRMZM2G053223	920	2	4	10	12	1.25301	0	0	0
24091	chr1	GRMZM5G884432	GRMZM5G884432	1022	19	21	36	54	1.25303	0	0	0
44351	chr3	GRMZM2G382632	GRMZM2G382632	1807	5	14	55	71	1.25304	0	0	0
66366	chr5	GRMZM2G126572	GRMZM2G126572	1425	31	16	60	123	1.25306	0	0	0
29292	chr2	GRMZM2G120724	GRMZM2G120724	1332	4	19	43	112	1.25307	0	0	0
11979	chr1	GRMZM2G057412	GRMZM2G057412	2094	110	73	136	185	1.25308	0	0	0
50972	chr4	GRMZM2G005583	GRMZM2G005583	2146	81	139	188	266	1.25309	0	0	0
54875	chr4	GRMZM2G155305	GRMZM2G155305	1170	11	35	150	242	1.2531	0	0	0
75235	chr6	GRMZM2G027309	GRMZM2G027309	1854	3	5	10	11	1.25312	0	0	0
109412	chr9	GRMZM5G833332	GRMZM5G833332	1188	3	5	10	11	1.25312	0	0	0
11364	chr1	GRMZM2G039891	GRMZM2G039891	2394	539	191	315	325	1.25312	0	0	0
31116	chr2	GRMZM2G312501	GRMZM2G312501	2132	9	20	54	77	1.25313	0	0	0
52727	chr4	GRMZM2G074122	GRMZM2G074122	3425	47	122	360	698	1.25315	0	0	0
86522	chr7	GRMZM2G139941	GRMZM2G139941	1627	59	77	136	219	1.25318	0	0	0
51778	chr4	GRMZM2G038195	GRMZM2G038195	1859	78	102	140	164	1.25318	0	0	0
86428	chr7	GRMZM2G135763	GRMZM2G135763	2100	18	38	100	128	1.25321	0	0	0
21174	chr1	GRMZM2G548835	GRMZM2G548835	257	5	2	3	3	1.25333	0	0	0
23609	chr1	GRMZM5G852014	GRMZM5G852014	534	5	2	3	3	1.25333	0	0	0
33374	chr2	GRMZM2G489927	GRMZM2G489927	666	5	2	3	3	1.25333	0	0	0
84134	chr7	GRMZM2G009103	GRMZM2G009103	1498	5	2	3	3	1.25333	0	0	0
88192	chr7	GRMZM2G418937	GRMZM2G418937	1623	5	2	3	3	1.25333	0	0	0
91974	chr8	AC194942.3_FG001	AC194942.3_FG001	786	5	2	3	3	1.25333	0	0	0
94607	chr8	GRMZM2G086334	GRMZM2G086334	1092	5	2	3	3	1.25333	0	0	0
94977	chr8	GRMZM2G104234	GRMZM2G104234	435	5	2	3	3	1.25333	0	0	0
101020	chr8	GRMZM5G865463	GRMZM5G865463	381	5	2	3	3	1.25333	0	0	0
19065	chr1	GRMZM2G486046	GRMZM2G486046	1252	14	22	7	3	1.25337	0	0	0
106914	chr9	GRMZM2G476230	GRMZM2G476230	1414	8	12	53	168	1.25338	0	0	0
63200	chr5	AC233894.1_FG004	AC233894.1_FG004	345	8	5	16	31	1.25339	0	0	0
20515	chr1	GRMZM2G528636	GRMZM2G528636	121	7	7	19	2	1.25339	0	0	0
48336	chr3	GRMZM5G819302	GRMZM5G819302	1720	6409	2080	2631	2191	1.2534	0	0	0
96564	chr8	GRMZM2G304019	GRMZM2G304019	531	3	2	7	18	1.25343	0	0	0
66468	chr5	GRMZM2G130053	GRMZM2G130053	1815	2998	3613	4687	5944	1.25345	0	0	0
21215	chr1	GRMZM2G549869	GRMZM2G549869	730	7	6	7	3	1.25347	0	0	0
47827	chr3	GRMZM2G585019	GRMZM2G585019	873	21	13	7	8	1.25349	0	0	0
105572	chr9	GRMZM2G303312	GRMZM2G303312	3310	31	35	67	109	1.2535	0	0	0
3789	chr10	GRMZM2G166694	GRMZM2G166694	3362	362	536	908	994	1.25353	0	0	0
75014	chr6	GRMZM2G014119	GRMZM2G014119	1051	4	4	7	2	1.25358	0	0	0
75016	chr6	GRMZM2G014256	GRMZM2G014256	1029	4	4	7	2	1.25358	0	0	0
97006	chr8	GRMZM2G353895	GRMZM2G353895	2193	2	4	14	8	1.25358	0	0	0
86662	chr7	GRMZM2G146781	GRMZM2G146781	765	62	74	40	25	1.2537	0	0	0
15885	chr1	GRMZM2G172410	GRMZM2G172410	3124	180	115	335	610	1.2537	0	0	0
94373	chr8	GRMZM2G075250	GRMZM2G075250	1127	200	77	121	123	1.2537	0	0	0
30004	chr2	GRMZM2G147885	GRMZM2G147885	2602	17	38	93	170	1.25382	0	0	0
95477	chr8	GRMZM2G129142	GRMZM2G129142	1059	14	7	3	3	1.25384	0	0	0
32870	chr2	GRMZM2G457003	GRMZM2G457003	3018	12	19	63	166	1.25387	0	0	0
14339	chr1	GRMZM2G124353	GRMZM2G124353	2213	113	34	214	523	1.25389	0	0	0
25986	chr2	GRMZM2G002559	GRMZM2G002559	2638	2	3	10	26	1.2539	0	0	0
40209	chr3	GRMZM2G044265	GRMZM2G044265	871	217	217	308	392	1.25392	0	0	0
42583	chr3	GRMZM2G144621	GRMZM2G144621	2345	8	14	19	27	1.25394	0	0	0
67045	chr5	GRMZM2G153227	GRMZM2G153227	891	127	307	179	135	1.25394	0	0	0
64629	chr5	GRMZM2G060355	GRMZM2G060355	2034	71	133	327	336	1.25397	0	0	0
40631	chr3	GRMZM2G060647	GRMZM2G060647	1825	6730	2158	2716	2232	1.25397	0	0	0
36485	chr2	GRMZM5G804454	GRMZM5G804454	1636	63	81	111	124	1.25402	0	0	0
13203	chr1	GRMZM2G092663	GRMZM2G092663	1199	117	178	490	202	1.25405	0	0	0
43254	chr3	GRMZM2G175031	GRMZM2G175031	1297	29	20	36	48	1.25412	0	0	0
16080	chr1	GRMZM2G177928	GRMZM2G177928	2036	57	125	251	825	1.25417	0	0	0
974	chr10	AC210050.3_FG006	AC210050.3_FG006	3363	2	3	7	4	1.25429	0	0	0
10028	chr1	GRMZM2G001606	GRMZM2G001606	1187	2	3	7	4	1.25429	0	0	0
16611	chr1	GRMZM2G326151	GRMZM2G326151	749	2	3	7	4	1.25429	0	0	0
32399	chr2	GRMZM2G416045	GRMZM2G416045	1485	2	3	7	4	1.25429	0	0	0
41541	chr3	GRMZM2G097972	GRMZM2G097972	660	2	3	7	4	1.25429	0	0	0
68832	chr5	GRMZM2G401436	GRMZM2G401436	1391	2	3	7	4	1.25429	0	0	0
87039	chr7	GRMZM2G169189	GRMZM2G169189	233	2	3	7	4	1.25429	0	0	0
87519	chr7	GRMZM2G333142	GRMZM2G333142	1567	2	3	7	4	1.25429	0	0	0
92258	chr8	AC199843.4_FG009	AC199843.4_FG009	234	2	3	7	4	1.25429	0	0	0
95888	chr8	GRMZM2G149683	GRMZM2G149683	1062	2	3	7	4	1.25429	0	0	0
100493	chr8	GRMZM5G806418	GRMZM5G806418	234	2	3	7	4	1.25429	0	0	0
103671	chr9	GRMZM2G077664	GRMZM2G077664	471	2	3	7	4	1.25429	0	0	0
105200	chr9	GRMZM2G161760	GRMZM2G161760	611	2	3	7	4	1.25429	0	0	0
63382	chr5	GRMZM2G007201	GRMZM2G007201	789	288	100	237	307	1.25436	0	0	0
76454	chr6	GRMZM2G092244	GRMZM2G092244	2052	3	10	46	76	1.25436	0	0	0
24072	chr1	GRMZM5G883468	GRMZM5G883468	612	2	4	11	11	1.2544	0	0	0
108068	chr9	GRMZM2G541204	GRMZM2G541204	116	2	6	11	22	1.25441	0	0	0
40174	chr3	GRMZM2G042818	GRMZM2G042818	1647	48	53	50	115	1.25442	0	0	0
4313	chr10	GRMZM2G332918	GRMZM2G332918	1050	25	38	12	5	1.25444	0	0	0
3875	chr10	GRMZM2G172930	GRMZM2G172930	1828	16	20	42	17	1.25444	0	0	0
54724	chr4	GRMZM2G149281	GRMZM2G149281	2242	81	84	165	265	1.25446	0	0	0
28190	chr2	GRMZM2G080041	GRMZM2G080041	3623	2	3	3	30	1.25448	0	0	0
79486	chr6	GRMZM2G446253	GRMZM2G446253	1310	4	22	194	383	1.25449	0	0	0
30634	chr2	GRMZM2G170276	GRMZM2G170276	833	543	621	378	257	1.25455	0	0	0
5141	chr10	GRMZM2G451179	GRMZM2G451179	1524	5	7	11	12	1.25464	0	0	0
38641	chr3	AC209852.3_FG001	AC209852.3_FG001	303	8	8	12	5	1.25465	0	0	0
68642	chr5	GRMZM2G385945	GRMZM2G385945	842	1012	1295	688	426	1.25469	0	0	0
845	chr10	AC203972.3_FG001	AC203972.3_FG001	2712	2	4	32	165	1.25469	0	0	0
52896	chr4	GRMZM2G080519	GRMZM2G080519	2002	18	20	46	84	1.25474	0	0	0
71386	chr5	GRMZM2G553534	GRMZM2G553534	1256	9	3	5	5	1.25478	0	0	0
105375	chr9	GRMZM2G171986	GRMZM2G171986	1056	62	67	64	125	1.25489	0	0	0
244	chr10	AC152495.1_FG017	AC152495.1_FG017	3222	8	21	73	105	1.25491	0	0	0
5128	chr10	GRMZM2G448104	GRMZM2G448104	4272	65	171	278	491	1.25493	0	0	0
96623	chr8	GRMZM2G310944	GRMZM2G310944	1696	23	24	45	70	1.25497	0	0	0
94817	chr8	GRMZM2G095964	GRMZM2G095964	1106	250	172	300	389	1.25497	0	0	0
36578	chr2	GRMZM5G812595	GRMZM5G812595	1493	2	4	9	14	1.25503	0	0	0
36848	chr2	GRMZM5G836157	GRMZM5G836157	498	2	4	9	14	1.25503	0	0	0
32573	chr2	GRMZM2G431309	GRMZM2G431309	2363	139	243	716	411	1.25504	0	0	0
29498	chr2	GRMZM2G129238	GRMZM2G129238	2146	157	443	734	1332	1.25507	0	0	0
79395	chr6	GRMZM2G436404	GRMZM2G436404	1707	3	4	11	24	1.25513	0	0	0
12475	chr1	GRMZM2G071873	GRMZM2G071873	1344	3	3	9	19	1.25515	0	0	0
39802	chr3	GRMZM2G027976	GRMZM2G027976	1671	4	5	4	44	1.25515	0	0	0
28435	chr2	GRMZM2G087662	GRMZM2G087662	1189	4	10	38	39	1.25515	0	0	0
56156	chr4	GRMZM2G349536	GRMZM2G349536	1028	6	12	31	36	1.25519	0	0	0
32485	chr2	GRMZM2G422045	GRMZM2G422045	3999	4	8	8	9	1.25519	0	0	0
72877	chr5	GRMZM5G836353	GRMZM5G836353	1677	54	63	243	639	1.25523	0	0	0
41659	chr3	GRMZM2G103755	GRMZM2G103755	2018	29	143	128	153	1.25524	0	0	0
11436	chr1	GRMZM2G041456	GRMZM2G041456	474	72	86	36	18	1.25525	0	0	0
11505	chr1	GRMZM2G043141	GRMZM2G043141	2328	2	3	5	6	1.25529	0	0	0
12691	chr1	GRMZM2G077615	GRMZM2G077615	1897	2	3	5	6	1.25529	0	0	0
17921	chr1	GRMZM2G419431	GRMZM2G419431	1698	2	3	5	6	1.25529	0	0	0
23428	chr1	GRMZM5G838390	GRMZM5G838390	630	2	3	5	6	1.25529	0	0	0
26702	chr2	GRMZM2G027397	GRMZM2G027397	453	2	3	5	6	1.25529	0	0	0
32934	chr2	GRMZM2G462248	GRMZM2G462248	1531	2	3	5	6	1.25529	0	0	0
47281	chr3	GRMZM2G561065	GRMZM2G561065	125	2	3	5	6	1.25529	0	0	0
48335	chr3	GRMZM5G819052	GRMZM5G819052	1212	2	3	5	6	1.25529	0	0	0
65068	chr5	GRMZM2G077576	GRMZM2G077576	1255	2	3	5	6	1.25529	0	0	0
96621	chr8	GRMZM2G310580	GRMZM2G310580	501	5	6	10	15	1.25529	0	0	0
109415	chr9	GRMZM5G833563	GRMZM5G833563	2101	2	3	5	6	1.25529	0	0	0
27506	chr2	GRMZM2G055370	GRMZM2G055370	3383	24	42	122	73	1.25529	0	0	0
60307	chr4	GRMZM2G579265	GRMZM2G579265	386	2	2	9	25	1.25529	0	0	0
84415	chr7	GRMZM2G025367	GRMZM2G025367	935	2	2	9	25	1.25529	0	0	0
66813	chr5	GRMZM2G143998	GRMZM2G143998	2160	6	7	69	343	1.25529	0	0	0
109910	chr9	GRMZM5G889313	GRMZM5G889313	259	10	15	6	3	1.25532	0	0	0
106071	chr9	GRMZM2G367650	GRMZM2G367650	1138	2	2	11	35	1.25534	0	0	0
29694	chr2	GRMZM2G136980	GRMZM2G136980	190	21	33	10	4	1.25534	0	0	0
52094	chr4	GRMZM2G050467	GRMZM2G050467	1461	210	406	290	245	1.25535	0	0	0
87170	chr7	GRMZM2G177050	GRMZM2G177050	1686	155	202	405	707	1.2554	0	0	0
70611	chr5	GRMZM2G524937	GRMZM2G524937	908	320	527	175	76	1.25547	0	0	0
104050	chr9	GRMZM2G098875	GRMZM2G098875	2038	5	5	10	16	1.25548	0	0	0
37045	chr2	GRMZM5G853400	GRMZM5G853400	1305	195	571	324	242	1.25549	0	0	0
9144	chr1	AC206307.3_FG002	AC206307.3_FG002	462	8	3	14	29	1.25551	0	0	0
19329	chr1	GRMZM2G493887	GRMZM2G493887	117	14	6	2	3	1.25554	0	0	0
72784	chr5	GRMZM5G828686	GRMZM5G828686	936	2	4	15	8	1.25554	0	0	0
13284	chr1	GRMZM2G094742	GRMZM2G094742	1569	2723	1558	1738	1563	1.2556	0	0	0
87655	chr7	GRMZM2G352289	GRMZM2G352289	1074	14	17	40	76	1.25569	0	0	0
11303	chr1	GRMZM2G038301	GRMZM2G038301	2155	414	464	440	1143	1.25569	0	0	0
13688	chr1	GRMZM2G107838	GRMZM2G107838	2123	77	99	133	156	1.25574	0	0	0
93456	chr8	GRMZM2G028733	GRMZM2G028733	2195	28	29	61	102	1.2558	0	0	0
67513	chr5	GRMZM2G171354	GRMZM2G171354	2617	226	104	339	586	1.25581	0	0	0
102677	chr9	GRMZM2G019586	GRMZM2G019586	1509	8	5	2	12	1.25582	0	0	0
84459	chr7	GRMZM2G026614	GRMZM2G026614	1643	400	380	724	1230	1.25583	0	0	0
30381	chr2	GRMZM2G161087	GRMZM2G161087	2692	26	52	131	162	1.25588	0	0	0
78586	chr6	GRMZM2G340527	GRMZM2G340527	2998	6	12	33	34	1.25588	0	0	0
24277	chr1	GRMZM5G896540	GRMZM5G896540	2596	3	3	13	35	1.25591	0	0	0
72918	chr5	GRMZM5G839593	GRMZM5G839593	2283	6	46	41	52	1.25593	0	0	0
41136	chr3	GRMZM2G081188	GRMZM2G081188	2648	349	349	648	984	1.25597	0	0	0
68429	chr5	GRMZM2G367411	GRMZM2G367411	1620	23	23	37	51	1.25598	0	0	0
4240	chr10	GRMZM2G323024	GRMZM2G323024	4583	21733	22464	68227	145949	1.25601	0	0	0
85005	chr7	GRMZM2G056569	GRMZM2G056569	1734	199	327	659	709	1.25602	0	0	0
104485	chr9	GRMZM2G119627	GRMZM2G119627	1929	69	103	174	201	1.25606	0	0	0
87915	chr7	GRMZM2G382413	GRMZM2G382413	2247	13	22	74	199	1.25611	0	0	0
63791	chr5	GRMZM2G024079	GRMZM2G024079	305	3	5	35	3	1.25614	0	0	0
27634	chr2	GRMZM2G060160	GRMZM2G060160	3107	92	175	376	556	1.25615	0	0	0
48970	chr3	GRMZM5G873287	GRMZM5G873287	1118	80	85	155	237	1.25617	0	0	0
7863	chr10	GRMZM5G886363	GRMZM5G886363	2477	68	104	163	237	1.25617	0	0	0
56303	chr4	GRMZM2G362857	GRMZM2G362857	733	21	51	32	25	1.25618	0	0	0
27367	chr2	GRMZM2G050920	GRMZM2G050920	831	3	2	11	43	1.2562	0	0	0
31995	chr2	GRMZM2G381787	GRMZM2G381787	1377	6	13	36	47	1.25621	0	0	0
76444	chr6	GRMZM2G091694	GRMZM2G091694	601	8	2	6	8	1.25621	0	0	0
39509	chr3	GRMZM2G016435	GRMZM2G016435	648	6	6	20	45	1.25623	0	0	0
8048	chr1	AC177936.6_FG008	AC177936.6_FG008	495	40	74	107	161	1.25623	0	0	0
3556	chr10	GRMZM2G151566	GRMZM2G151566	289	15	16	55	129	1.25627	0	0	0
73405	chr5	GRMZM5G879542	GRMZM5G879542	333	13	38	37	43	1.25631	0	0	0
31760	chr2	GRMZM2G363470	GRMZM2G363470	1520	2	8	8	10	1.25631	0	0	0
52548	chr4	GRMZM2G068112	GRMZM2G068112	2921	120	168	261	295	1.25636	0	0	0
7004	chr10	GRMZM2G583647	GRMZM2G583647	206	2	6	3	2	1.25636	0	0	0
11042	chr1	GRMZM2G029871	GRMZM2G029871	950	2	6	3	2	1.25636	0	0	0
28581	chr2	GRMZM2G092781	GRMZM2G092781	908	2	6	3	2	1.25636	0	0	0
49222	chr3	GRMZM5G896052	GRMZM5G896052	792	2	6	3	2	1.25636	0	0	0
57684	chr4	GRMZM2G485902	GRMZM2G485902	459	2	6	3	2	1.25636	0	0	0
96615	chr8	GRMZM2G310158	GRMZM2G310158	513	2	6	3	2	1.25636	0	0	0
97804	chr8	GRMZM2G445338	GRMZM2G445338	1654	2	6	3	2	1.25636	0	0	0
106655	chr9	orf110-c	GRMZM2G443343	813	2	6	3	2	1.25636	0	0	0
42741	chr3	GRMZM2G151717	GRMZM2G151717	2290	13	26	63	85	1.25645	0	0	0
75007	chr6	rps2	GRMZM2G013798	4012	1235	2090	654	268	1.25646	0	0	0
1587	chr10	GRMZM2G022308	GRMZM2G022308	1831	13	24	35	53	1.25648	0	0	0
83387	chr7	AC200223.4_FG003	AC200223.4_FG003	231	3	6	15	19	1.25653	0	0	0
85083	chr7	GRMZM2G060511	GRMZM2G060511	1422	75	76	127	180	1.25672	0	0	0
44053	chr3	GRMZM2G355636	GRMZM2G355636	3234	3	4	8	14	1.25673	0	0	0
49476	chr4	AC185659.5_FG001	AC185659.5_FG001	558	3	4	8	14	1.25673	0	0	0
3100	chr10	GRMZM2G123654	GRMZM2G123654	1767	2	13	5	3	1.25679	0	0	0
93002	chr8	cl2-1	GRMZM2G005552	1385	17	25	43	46	1.25684	0	0	0
78346	chr6	GRMZM2G312997	GRMZM2G312997	2094	3	4	3	89	1.2569	0	0	0
16954	chr1	GRMZM2G350031	GRMZM2G350031	814	33	91	52	38	1.25693	0	0	0
76985	chr6	GRMZM2G119714	GRMZM2G119714	2554	5	38	32	38	1.25693	0	0	0
14324	chr1	GRMZM2G124042	GRMZM2G124042	1636	2	4	4	339	1.25694	0	0	0
108722	chr9	GRMZM2G576752	GRMZM2G576752	2694	10	61	626	1334	1.25703	0	0	0
56480	chr4	GRMZM2G379271	GRMZM2G379271	754	7	19	77	93	1.25706	0	0	0
41169	chr3	GRMZM2G082780	GRMZM2G082780	3222	2	3	11	30	1.25706	0	0	0
5303	chr10	GRMZM2G474769	GRMZM2G474769	2422	4398	5670	9699	15107	1.2571	0	0	0
86187	chr7	GRMZM2G121516	GRMZM2G121516	2056	202	377	857	1076	1.25727	0	0	0
30258	chr2	GRMZM2G156348	GRMZM2G156348	1392	6	10	21	22	1.25729	0	0	0
54968	chr4	GRMZM2G157722	GRMZM2G157722	2013	9	16	27	64	1.25732	0	0	0
39218	chr3	GRMZM2G004161	GRMZM2G004161	1593	5	11	33	39	1.2574	0	0	0
63405	chr5	GRMZM2G008242	GRMZM2G008242	1876	31	77	289	314	1.25741	0	0	0
18801	chr1	GRMZM2G474798	GRMZM2G474798	8784	155	250	432	607	1.25745	0	0	0
11781	chr1	GRMZM2G050746	GRMZM2G050746	376	6	6	9	4	1.25747	0	0	0
73442	chr5	GRMZM5G882378	GRMZM5G882378	2255	14	25	69	52	1.25788	0	0	0
94282	chr8	GRMZM2G070978	GRMZM2G070978	867	8	4	32	101	1.25788	0	0	0
92104	chr8	AC197705.4_FG011	AC197705.4_FG011	2895	19	16	116	408	1.25799	0	0	0
4810	chr10	GRMZM2G405662	GRMZM2G405662	964	3	5	13	9	1.258	0	0	0
44809	chr3	SH2	GRMZM2G429899	2592	6	23	10	6	1.25807	0	0	0
41655	chr3	GRMZM2G103544	GRMZM2G103544	2261	69	111	171	353	1.25808	0	0	0
106263	chr9	GRMZM2G393752	GRMZM2G393752	393	61	42	102	162	1.25817	0	0	0
71332	chr5	GRMZM2G551547	GRMZM2G551547	441	2	2	15	57	1.25828	0	0	0
78207	chr6	GRMZM2G179562	GRMZM2G179562	592	3	2	7	14	1.25829	0	0	0
94780	chr8	GRMZM2G094356	GRMZM2G094356	1305	3	2	7	14	1.25829	0	0	0
77871	chr6	GRMZM2G162127	GRMZM2G162127	858	47	23	109	240	1.25831	0	0	0
12048	chr1	GRMZM2G058783	GRMZM2G058783	748	3	2	5	8	1.25832	0	0	0
30954	chr2	GRMZM2G180950	GRMZM2G180950	608	3	2	5	8	1.25832	0	0	0
40946	chr3	GRMZM2G072435	GRMZM2G072435	812	3	2	5	8	1.25832	0	0	0
43143	chr3	GRMZM2G169118	GRMZM2G169118	218	3	2	5	8	1.25832	0	0	0
50954	chr4	GRMZM2G004965	GRMZM2G004965	1670	3	2	5	8	1.25832	0	0	0
55576	chr4	GRMZM2G181491	GRMZM2G181491	1794	3	2	5	8	1.25832	0	0	0
64846	chr5	GRMZM2G069670	GRMZM2G069670	826	6	4	10	16	1.25832	0	0	0
76679	chr6	GRMZM2G102888	GRMZM2G102888	547	3	2	5	8	1.25832	0	0	0
83993	chr7	GRMZM2G001381	GRMZM2G001381	546	3	2	5	8	1.25832	0	0	0
84233	chr7	GRMZM2G014371	GRMZM2G014371	494	3	2	5	8	1.25832	0	0	0
86051	chr7	GRMZM2G113917	GRMZM2G113917	279	3	2	5	8	1.25832	0	0	0
104879	chr9	GRMZM2G144173	GRMZM2G144173	1178	3	2	5	8	1.25832	0	0	0
106776	chr9	GRMZM2G459498	GRMZM2G459498	420	3	2	5	8	1.25832	0	0	0
54242	chr4	GRMZM2G131332	GRMZM2G131332	2743	79	50	153	275	1.25832	0	0	0
54306	chr4	GRMZM2G133756	GRMZM2G133756	2096	254	185	361	505	1.25834	0	0	0
52755	chr4	GRMZM2G075074	GRMZM2G075074	1247	14016	6360	2461	2834	1.25835	0	0	0
11909	chr1	GRMZM2G055386	GRMZM2G055386	542	124	51	17	24	1.25841	0	0	0
30892	chr2	GRMZM2G178365	GRMZM2G178365	1228	6	16	72	69	1.25846	0	0	0
92155	chr8	AC198998.2_FG003	AC198998.2_FG003	2148	2	2	18	77	1.2585	0	0	0
23121	chr1	GRMZM5G817934	GRMZM5G817934	887	26	65	42	33	1.25857	0	0	0
32145	chr2	GRMZM2G395237	GRMZM2G395237	1659	83	69	131	188	1.25857	0	0	0
29280	chr2	GRMZM2G120132	GRMZM2G120132	1034	2	2	8	20	1.2586	0	0	0
40742	chr3	GRMZM2G064442	GRMZM2G064442	1138	2	2	8	20	1.2586	0	0	0
43106	chr3	GRMZM2G166880	GRMZM2G166880	745	2	2	8	20	1.2586	0	0	0
100976	chr8	GRMZM5G861077	GRMZM5G861077	2099	2	2	8	20	1.2586	0	0	0
3176	chr10	GRMZM2G127375	GRMZM2G127375	590	19	18	47	87	1.25866	0	0	0
43186	chr3	GRMZM2G170240	GRMZM2G170240	171	4	5	3	2	1.25871	0	0	0
92936	chr8	GRMZM2G002776	GRMZM2G002776	437	2	3	5	4	1.25871	0	0	0
84166	chr7	GRMZM2G010702	GRMZM2G010702	788	7	20	12	9	1.25879	0	0	0
51384	chr4	GRMZM2G020081	GRMZM2G020081	2547	3	4	4	30	1.25882	0	0	0
28253	chr2	GRMZM2G081930	GRMZM2G081930	1341	2	2	7	16	1.25883	0	0	0
53802	chr4	GRMZM2G114778	GRMZM2G114778	766	2	2	7	16	1.25883	0	0	0
61371	chr4	GRMZM5G858491	GRMZM5G858491	186	2	2	7	16	1.25883	0	0	0
70526	chr5	GRMZM2G521844	GRMZM2G521844	1777	7	4	16	33	1.25888	0	0	0
27219	chr2	GRMZM2G046011	GRMZM2G046011	828	378	547	267	152	1.259	0	0	0
15119	chr1	GRMZM2G149414	GRMZM2G149414	979	1031	659	388	409	1.25908	0	0	0
23904	chr1	GRMZM5G873413	GRMZM5G873413	241	3	3	5	7	1.25908	0	0	0
82647	chr6	GRMZM5G873765	GRMZM5G873765	1390	3	3	5	7	1.25908	0	0	0
64063	chr5	GRMZM2G035405	GRMZM2G035405	2932	24	24	68	135	1.25912	0	0	0
28217	chr2	GRMZM2G080992	GRMZM2G080992	2170	5	9	29	17	1.25916	0	0	0
66494	chr5	GRMZM2G130536	GRMZM2G130536	836	2	6	6	7	1.25919	0	0	0
56838	chr4	GRMZM2G413253	GRMZM2G413253	2388	40	31	57	78	1.25921	0	0	0
16633	chr1	GRMZM2G327705	GRMZM2G327705	544	2	2	12	39	1.25926	0	0	0
51773	chr4	GRMZM2G038041	GRMZM2G038041	151	10	18	25	36	1.25933	0	0	0
13865	chr1	GRMZM2G112524	GRMZM2G112524	1105	5	17	16	18	1.2594	0	0	0
93112	chr8	GRMZM2G011031	GRMZM2G011031	1957	24	17	44	73	1.25948	0	0	0
42796	chr3	GRMZM2G154165	GRMZM2G154165	3730	6	4	2	8	1.25948	0	0	0
102096	chr9	AC213612.3_FG002	AC213612.3_FG002	699	11	8	17	25	1.25951	0	0	0
11439	chr1	GRMZM2G041613	GRMZM2G041613	1826	52	45	92	140	1.25954	0	0	0
68555	chr5	GRMZM2G379021	GRMZM2G379021	2842	139	198	396	295	1.25957	0	0	0
44501	chr3	GRMZM2G398731	GRMZM2G398731	996	3	2	9	21	1.25964	0	0	0
93532	chr8	GRMZM2G032001	GRMZM2G032001	1836	3	2	10	25	1.25966	0	0	0
53080	chr4	GRMZM2G088317	GRMZM2G088317	1190	91	58	33	43	1.25969	0	0	0
94850	chr8	GRMZM2G097141	GRMZM2G097141	804	3	4	4	33	1.25979	0	0	0
1618	chr10	GRMZM2G023534	GRMZM2G023534	1594	4	27	27	35	1.25985	0	0	0
23100	chr1	GRMZM5G816106	GRMZM5G816106	120	35	25	14	47	1.25986	0	0	0
84035	chr7	GRMZM2G003711	GRMZM2G003711	514	3	2	18	66	1.25988	0	0	0
24800	chr2	AC194970.5_FG009	AC194970.5_FG009	1437	3	9	61	39	1.25992	0	0	0
100678	chr8	GRMZM5G827505	GRMZM5G827505	1895	31	49	104	94	1.25993	0	0	0
65876	chr5	GRMZM2G109039	GRMZM2G109039	2245	496	476	798	1103	1.2601	0	0	0
40925	chr3	GRMZM2G071680	GRMZM2G071680	1309	36	16	6	8	1.26016	0	0	0
11001	chr1	GRMZM2G028500	GRMZM2G028500	1014	206	126	70	80	1.26025	0	0	0
30660	chr2	GRMZM2G171548	GRMZM2G171548	1494	2	6	43	25	1.26026	0	0	0
45187	chr3	GRMZM2G464976	GRMZM2G464976	4859	12	26	113	66	1.26029	0	0	0
106366	chr9	GRMZM2G404897	GRMZM2G404897	3527	344	241	537	801	1.2603	0	0	0
43574	chr3	GRMZM2G314702	GRMZM2G314702	1342	3	11	5	3	1.2603	0	0	0
10532	chr1	GRMZM2G015219	GRMZM2G015219	3062	31	17	72	150	1.26034	0	0	0
82494	chr6	GRMZM5G856337	GRMZM5G856337	936	2	2	9	24	1.26053	0	0	0
40692	chr3	GRMZM2G062245	GRMZM2G062245	1488	4	3	7	11	1.26062	0	0	0
77966	chr6	GRMZM2G167387	GRMZM2G167387	1346	2	16	16	21	1.26065	0	0	0
65029	chr5	GRMZM2G076136	GRMZM2G076136	1119	836	664	3262	8493	1.26066	0	0	0
16250	chr1	GRMZM2G301926	GRMZM2G301926	852	2	2	16	62	1.26069	0	0	0
102447	chr9	GRMZM2G006178	GRMZM2G006178	3074	270	366	597	573	1.26078	0	0	0
78392	chr6	GRMZM2G318180	GRMZM2G318180	605	7	18	118	53	1.26081	0	0	0
43841	chr3	GRMZM2G338465	GRMZM2G338465	1734	21	20	77	182	1.26085	0	0	0
78939	chr6	GRMZM2G383114	GRMZM2G383114	626	15	45	24	16	1.2609	0	0	0
66892	chr5	GRMZM2G146374	GRMZM2G146374	1463	386	382	618	842	1.2609	0	0	0
28881	chr2	GRMZM2G104538	GRMZM2G104538	1313	248	311	101	39	1.26107	0	0	0
10704	chr1	GRMZM2G019991	GRMZM2G019991	1833	48	32	97	173	1.26107	0	0	0
53854	chr4	HIR1	GRMZM2G117755	1696	279	379	650	573	1.26108	0	0	0
24293	chr1	GRMZM5G897521	GRMZM5G897521	429	16	11	6	20	1.26111	0	0	0
104342	chr9	GRMZM2G113060	GRMZM2G113060	1357	12	16	13	511	1.26114	0	0	0
2489	chr10	GRMZM2G080650	GRMZM2G080650	1373	165	523	502	561	1.2612	0	0	0
29302	chr2	GRMZM2G121223	GRMZM2G121223	1916	6	6	23	55	1.2613	0	0	0
73346	chr5	GRMZM5G874596	GRMZM5G874596	387	8	6	12	17	1.2614	0	0	0
51370	chr4	GRMZM2G019663	GRMZM2G019663	713	53	35	21	27	1.26144	0	0	0
40867	chr3	GRMZM2G069455	GRMZM2G069455	2230	38	32	63	92	1.26144	0	0	0
87654	chr7	GRMZM2G352040	GRMZM2G352040	1097	218	121	414	747	1.26145	0	0	0
66615	chr5	GRMZM2G135691	GRMZM2G135691	725	96	227	147	112	1.26148	0	0	0
65126	chr5	GRMZM2G079954	GRMZM2G079954	1452	3	5	11	11	1.26153	0	0	0
41120	chr3	GRMZM2G080672	GRMZM2G080672	461	2	4	14	10	1.26153	0	0	0
51746	chr4	GRMZM2G036711	GRMZM2G036711	1459	28	64	297	185	1.26165	0	0	0
10361	chr1	GRMZM2G010838	GRMZM2G010838	369	3	2	8	17	1.26174	0	0	0
13798	chr1	GRMZM2G110210	GRMZM2G110210	1244	3	2	8	17	1.26174	0	0	0
2975	chr10	GRMZM2G113800	GRMZM2G113800	1726	2	4	16	9	1.26182	0	0	0
96004	chr8	GRMZM2G155889	GRMZM2G155889	1873	122	113	191	261	1.26186	0	0	0
28888	chr2	GRMZM2G104999	GRMZM2G104999	1479	156	135	338	581	1.26198	0	0	0
25952	chr2	GRMZM2G001524	GRMZM2G001524	576	6	4	20	49	1.26199	0	0	0
29667	chr2	GRMZM2G135727	GRMZM2G135727	2366	186	297	706	546	1.26207	0	0	0
102521	chr9	GRMZM2G009724	GRMZM2G009724	1669	2	6	37	30	1.26227	0	0	0
50929	chr4	GRMZM2G004067	GRMZM2G004067	1078	275	106	34	50	1.26228	0	0	0
61453	chr4	GRMZM5G866627	GRMZM5G866627	1354	20	36	108	77	1.26236	0	0	0
26527	chr2	GRMZM2G021694	GRMZM2G021694	1270	419	313	787	1285	1.26241	0	0	0
109106	chr9	GRMZM5G800108	GRMZM5G800108	1008	2	2	18	74	1.26264	0	0	0
27436	chr2	GRMZM2G052569	GRMZM2G052569	2161	100	186	132	105	1.26265	0	0	0
27480	chr2	GRMZM2G054046	GRMZM2G054046	605	2	2	12	38	1.26266	0	0	0
66830	chr5	GRMZM2G144146	GRMZM2G144146	2282	4	10	45	39	1.2627	0	0	0
97424	chr8	GRMZM2G399338	GRMZM2G399338	1671	11	4	36	103	1.26277	0	0	0
66722	chr5	GRMZM2G139412	GRMZM2G139412	1053	4	4	16	39	1.26281	0	0	0
7683	chr10	GRMZM5G861139	GRMZM5G861139	156	7	5	3	8	1.2629	0	0	0
15598	chr1	GRMZM2G163296	GRMZM2G163296	1152	19	15	30	43	1.2631	0	0	0
23856	chr1	GRMZM5G869862	GRMZM5G869862	1382	2	5	22	20	1.26312	0	0	0
3082	chr10	GRMZM2G122550	GRMZM2G122550	195	2	2	5	9	1.26313	0	0	0
3094	chr10	GRMZM2G123308	GRMZM2G123308	2029	2	2	5	9	1.26313	0	0	0
4094	chr10	GRMZM2G302817	GRMZM2G302817	1428	2	2	5	9	1.26313	0	0	0
9635	chr1	AC213857.4_FG003	AC213857.4_FG003	333	2	2	5	9	1.26313	0	0	0
10698	chr1	GRMZM2G019689	GRMZM2G019689	2359	2	2	5	9	1.26313	0	0	0
13815	chr1	GRMZM2G110425	GRMZM2G110425	822	2	2	5	9	1.26313	0	0	0
21681	chr1	GRMZM2G562966	GRMZM2G562966	570	2	2	5	9	1.26313	0	0	0
25640	chr2	AC212859.3_FG004	AC212859.3_FG004	426	2	2	5	9	1.26313	0	0	0
27418	chr2	GRMZM2G052277	GRMZM2G052277	1620	2	2	5	9	1.26313	0	0	0
28871	chr2	GRMZM2G104286	GRMZM2G104286	1431	2	2	5	9	1.26313	0	0	0
31339	chr2	GRMZM2G328593	GRMZM2G328593	642	2	2	5	9	1.26313	0	0	0
31380	chr2	GRMZM2G333095	GRMZM2G333095	462	2	2	5	9	1.26313	0	0	0
38038	chr3	AC194698.2_FG001	AC194698.2_FG001	312	2	2	5	9	1.26313	0	0	0
43025	chr3	GRMZM2G163464	GRMZM2G163464	568	2	2	5	9	1.26313	0	0	0
43466	chr3	GRMZM2G306150	GRMZM2G306150	1050	2	2	5	9	1.26313	0	0	0
43611	chr3	GRMZM2G317499	GRMZM2G317499	765	2	2	5	9	1.26313	0	0	0
45241	chr3	GRMZM2G470426	GRMZM2G470426	883	2	2	5	9	1.26313	0	0	0
47497	chr3	GRMZM2G571030	GRMZM2G571030	174	2	2	5	9	1.26313	0	0	0
48270	chr3	GRMZM5G813904	GRMZM5G813904	630	2	2	5	9	1.26313	0	0	0
48756	chr3	GRMZM5G854013	GRMZM5G854013	903	2	2	5	9	1.26313	0	0	0
51208	chr4	GRMZM2G014086	GRMZM2G014086	800	2	2	5	9	1.26313	0	0	0
53319	chr4	GRMZM2G097865	GRMZM2G097865	2130	2	2	5	9	1.26313	0	0	0
54238	chr4	GRMZM2G131118	GRMZM2G131118	744	2	2	5	9	1.26313	0	0	0
54956	chr4	GRMZM2G157454	GRMZM2G157454	427	2	2	5	9	1.26313	0	0	0
56654	chr4	GRMZM2G393846	GRMZM2G393846	950	2	2	5	9	1.26313	0	0	0
63054	chr5	AC215634.3_FG003	AC215634.3_FG003	303	2	2	5	9	1.26313	0	0	0
63075	chr5	AC216242.3_FG001	AC216242.3_FG001	666	2	2	5	9	1.26313	0	0	0
64301	chr5	GRMZM2G045376	GRMZM2G045376	881	2	2	5	9	1.26313	0	0	0
67770	chr5	GRMZM2G300771	GRMZM2G300771	1453	2	2	5	9	1.26313	0	0	0
67771	chr5	GRMZM2G300774	GRMZM2G300774	1497	2	2	5	9	1.26313	0	0	0
68471	chr5	GRMZM2G370741	GRMZM2G370741	1896	2	2	5	9	1.26313	0	0	0
71783	chr5	GRMZM2G569341	GRMZM2G569341	1072	2	2	5	9	1.26313	0	0	0
73003	chr5	GRMZM5G846846	GRMZM5G846846	1038	2	2	5	9	1.26313	0	0	0
75529	chr6	GRMZM2G042905	GRMZM2G042905	252	2	2	5	9	1.26313	0	0	0
75728	chr6	ZAG1	GRMZM2G052890	1287	2	2	5	9	1.26313	0	0	0
79247	chr6	GRMZM2G419542	GRMZM2G419542	1502	2	2	5	9	1.26313	0	0	0
79325	chr6	GRMZM2G429133	GRMZM2G429133	846	2	2	5	9	1.26313	0	0	0
79350	chr6	GRMZM2G431861	GRMZM2G431861	1954	2	2	5	9	1.26313	0	0	0
82460	chr6	GRMZM5G851648	GRMZM5G851648	380	2	2	5	9	1.26313	0	0	0
84066	chr7	GRMZM2G006395	GRMZM2G006395	753	2	2	5	9	1.26313	0	0	0
86325	chr7	GRMZM2G130640	GRMZM2G130640	670	2	2	5	9	1.26313	0	0	0
88321	chr7	GRMZM2G434445	GRMZM2G434445	2304	2	2	5	9	1.26313	0	0	0
88359	chr7	GRMZM2G438628	GRMZM2G438628	410	2	2	5	9	1.26313	0	0	0
91284	chr7	GRMZM5G852651	GRMZM5G852651	441	2	2	5	9	1.26313	0	0	0
93248	chr8	GRMZM2G019140	GRMZM2G019140	1270	2	2	5	9	1.26313	0	0	0
94013	chr8	GRMZM2G056592	GRMZM2G056592	1077	2	2	5	9	1.26313	0	0	0
95823	chr8	GRMZM2G146047	GRMZM2G146047	3491	2	2	5	9	1.26313	0	0	0
96967	chr8	GRMZM2G350734	GRMZM2G350734	796	2	2	5	9	1.26313	0	0	0
103900	chr9	GRMZM2G091687	GRMZM2G091687	310	2	2	5	9	1.26313	0	0	0
78179	chr6	GRMZM2G177726	GRMZM2G177726	4456	6	13	57	35	1.26315	0	0	0
81198	chr6	GRMZM2G558539	GRMZM2G558539	1582	565	472	746	938	1.26318	0	0	0
50818	chr4	AC234156.1_FG005	AC234156.1_FG005	810	5	2	24	85	1.2632	0	0	0
29669	chr2	GRMZM2G135935	GRMZM2G135935	1450	88	85	174	272	1.26326	0	0	0
104987	chr9	GRMZM2G148930	GRMZM2G148930	1163	17	205	179	211	1.26334	0	0	0
4508	chr10	MSH1	GRMZM2G360873	4075	6	12	36	35	1.26347	0	0	0
82843	chr6	GRMZM5G897673	GRMZM5G897673	1074	2	2	10	28	1.26359	0	0	0
105832	chr9	GRMZM2G334592	GRMZM2G334592	2553	2	2	10	28	1.26359	0	0	0
54281	chr4	GRMZM2G132857	GRMZM2G132857	3650	180	169	308	442	1.2636	0	0	0
28073	chr2	GRMZM2G076279	GRMZM2G076279	1585	43	39	65	87	1.26363	0	0	0
13133	chr1	GRMZM2G090411	GRMZM2G090411	707	5	3	11	21	1.26366	0	0	0
17042	chr1	GRMZM2G356155	GRMZM2G356155	1008	2	4	13	11	1.26372	0	0	0
46897	chr3	GRMZM2G543252	GRMZM2G543252	714	2	4	13	11	1.26372	0	0	0
52053	chr4	GRMZM2G048801	GRMZM2G048801	3182	2	4	13	11	1.26372	0	0	0
106365	chr9	GRMZM2G404855	GRMZM2G404855	1454	88	71	176	291	1.26372	0	0	0
12200	chr1	GRMZM2G063291	GRMZM2G063291	1286	4	4	11	21	1.26373	0	0	0
42804	chr3	GRMZM2G154641	GRMZM2G154641	2853	18	13	101	333	1.26373	0	0	0
75852	chr6	GRMZM2G059825	GRMZM2G059825	1852	60	36	351	1251	1.26377	0	0	0
27379	chr2	GRMZM2G051355	GRMZM2G051355	2374	66	49	101	144	1.26378	0	0	0
7234	chr10	GRMZM5G800407	GRMZM5G800407	1880	2	11	5	3	1.26384	0	0	0
73184	chr5	GRMZM5G861959	GRMZM5G861959	2113	2	5	21	21	1.26392	0	0	0
85491	chr7	GRMZM2G081949	GRMZM2G081949	1660	98	181	560	416	1.26395	0	0	0
94284	chr8	GRMZM2G071223	GRMZM2G071223	695	6	17	10	7	1.26396	0	0	0
44048	chr3	GRMZM2G355342	GRMZM2G355342	1109	2	17	6	3	1.26416	0	0	0
77304	chr6	GRMZM2G134878	GRMZM2G134878	750	15	30	96	84	1.26418	0	0	0
53063	chr4	GRMZM2G087380	GRMZM2G087380	1534	4	4	7	10	1.26422	0	0	0
103231	chr9	GRMZM2G051896	GRMZM2G051896	2370	4	4	7	10	1.26422	0	0	0
4956	chr10	GRMZM2G427014	GRMZM2G427014	463	4	10	66	30	1.26428	0	0	0
77506	chr6	GRMZM2G144362	GRMZM2G144362	2547	77	195	117	82	1.26444	0	0	0
103083	chr9	GRMZM2G043338	GRMZM2G043338	1123	15	94	92	110	1.26445	0	0	0
16697	chr1	GRMZM2G331638	GRMZM2G331638	1751	3	3	12	29	1.26445	0	0	0
50918	chr4	GRMZM2G003662	GRMZM2G003662	1734	21	54	293	204	1.26451	0	0	0
2325	chr10	GRMZM2G070255	GRMZM2G070255	1217	3	6	4	3	1.26456	0	0	0
14017	chr1	GRMZM2G115730	GRMZM2G115730	1355	4	3	2	4	1.26456	0	0	0
19298	chr1	GRMZM2G492670	GRMZM2G492670	269	4	3	2	4	1.26456	0	0	0
21275	chr1	GRMZM2G550995	GRMZM2G550995	353	4	3	2	4	1.26456	0	0	0
32557	chr2	GRMZM2G429675	GRMZM2G429675	774	4	3	2	4	1.26456	0	0	0
51542	chr4	GRMZM2G026812	GRMZM2G026812	634	4	3	2	4	1.26456	0	0	0
56012	chr4	GRMZM2G335404	GRMZM2G335404	3477	4	3	2	4	1.26456	0	0	0
63365	chr5	GRMZM2G006009	GRMZM2G006009	433	3	6	4	3	1.26456	0	0	0
81069	chr6	GRMZM2G551516	GRMZM2G551516	542	4	3	2	4	1.26456	0	0	0
81130	chr6	GRMZM2G554589	GRMZM2G554589	341	4	3	2	4	1.26456	0	0	0
81643	chr6	GRMZM2G580430	GRMZM2G580430	204	4	3	2	4	1.26456	0	0	0
84890	chr7	GRMZM2G050965	GRMZM2G050965	252	4	3	2	4	1.26456	0	0	0
91058	chr7	GRMZM5G821671	GRMZM5G821671	725	4	3	2	4	1.26456	0	0	0
100875	chr8	GRMZM5G850924	GRMZM5G850924	1332	4	3	2	4	1.26456	0	0	0
4840	chr10	GRMZM2G409795	GRMZM2G409795	737	3	3	7	12	1.26456	0	0	0
24369	chr2	AC177878.4_FG001	AC177878.4_FG001	402	3	3	7	12	1.26456	0	0	0
41110	chr3	GRMZM2G080266	GRMZM2G080266	410	3	3	7	12	1.26456	0	0	0
73258	chr5	GRMZM5G867888	GRMZM5G867888	573	87	138	37	12	1.26458	0	0	0
41065	chr3	GRMZM2G078314	GRMZM2G078314	1126	17	32	90	84	1.2646	0	0	0
54933	chr4	GRMZM2G157188	GRMZM2G157188	1945	30	17	9	9	1.26461	0	0	0
26204	chr2	GRMZM2G009876	GRMZM2G009876	1421	127	257	173	131	1.26461	0	0	0
84735	chr7	GRMZM2G041629	GRMZM2G041629	667	3	2	10	24	1.26467	0	0	0
15267	chr1	GRMZM2G153706	GRMZM2G153706	1276	13	18	33	28	1.26469	0	0	0
29971	chr2	GRMZM2G147196	GRMZM2G147196	635	7	3	20	49	1.2648	0	0	0
84283	chr7	GRMZM2G017409	GRMZM2G017409	3513	24	23	43	63	1.26481	0	0	0
103748	chr9	GRMZM2G081729	GRMZM2G081729	1892	65	44	132	230	1.26486	0	0	0
67882	chr5	GRMZM2G312563	GRMZM2G312563	867	31	35	23	16	1.2649	0	0	0
73069	chr5	GRMZM5G852665	GRMZM5G852665	708	31	35	23	16	1.2649	0	0	0
64921	chr5	GRMZM2G072741	GRMZM2G072741	667	26	22	40	55	1.26494	0	0	0
69511	chr5	GRMZM2G466298	GRMZM2G466298	4132	5	3	12	24	1.26497	0	0	0
52714	chr4	GRMZM2G073788	GRMZM2G073788	1757	55	41	103	166	1.26497	0	0	0
106068	chr9	GRMZM2G366532	GRMZM2G366532	2961	14	34	204	103	1.26499	0	0	0
29914	chr2	GRMZM2G145095	GRMZM2G145095	457	6	4	11	18	1.26525	0	0	0
40043	chr3	GRMZM2G036720	GRMZM2G036720	2237	71	104	203	181	1.26527	0	0	0
37452	chr2	GRMZM5G886913	GRMZM5G886913	1421	110	90	273	512	1.26541	0	0	0
40677	chr3	GRMZM2G061890	GRMZM2G061890	2462	44	117	111	117	1.26544	0	0	0
67165	chr5	GRMZM2G159047	GRMZM2G159047	1276	3	2	20	74	1.26547	0	0	0
26223	chr2	GRMZM2G010428	GRMZM2G010428	996	8	7	20	37	1.26552	0	0	0
76202	chr6	GRMZM2G077436	GRMZM2G077436	1604	382	980	5967	3456	1.26554	0	0	0
91809	chr8	AC187551.3_FG002	AC187551.3_FG002	1914	3	7	35	22	1.26558	0	0	0
67151	chr5	GRMZM2G158359	GRMZM2G158359	3387	323	354	343	1124	1.26563	0	0	0
109232	chr9	GRMZM5G814159	GRMZM5G814159	1589	111	90	173	242	1.26578	0	0	0
29185	chr2	GRMZM2G115658	GRMZM2G115658	2198	31	20	61	105	1.26579	0	0	0
43160	chr3	GRMZM2G169773	GRMZM2G169773	1447	128	319	307	325	1.26579	0	0	0
31954	chr2	GRMZM2G379217	GRMZM2G379217	686	4	2	11	25	1.26588	0	0	0
52127	chr4	GRMZM2G051502	GRMZM2G051502	5352	35	12	152	509	1.26589	0	0	0
95307	chr8	GRMZM2G120816	GRMZM2G120816	3272	124	124	281	471	1.2659	0	0	0
31011	chr2	GRMZM2G303993	GRMZM2G303993	1071	26	28	28	59	1.26593	0	0	0
3845	chr10	GRMZM2G171006	GRMZM2G171006	2421	17	18	18	32	1.26594	0	0	0
32912	chr2	GRMZM2G459874	GRMZM2G459874	1197	31	22	88	186	1.26597	0	0	0
4544	chr10	GRMZM2G364861	GRMZM2G364861	722	2	2	6	12	1.26603	0	0	0
4815	chr10	GRMZM2G406108	GRMZM2G406108	934	2	2	6	12	1.26603	0	0	0
7599	chr10	GRMZM5G849918	GRMZM5G849918	526	2	2	6	12	1.26603	0	0	0
11399	chr1	GRMZM2G040503	GRMZM2G040503	601	2	2	6	12	1.26603	0	0	0
24330	chr2	AC155352.2_FG001	AC155352.2_FG001	1266	3	3	9	18	1.26603	0	0	0
30286	chr2	GRMZM2G157896	GRMZM2G157896	2514	2	2	6	12	1.26603	0	0	0
30539	chr2	GRMZM2G166622	GRMZM2G166622	1280	2	2	6	12	1.26603	0	0	0
31256	chr2	GRMZM2G322844	GRMZM2G322844	1410	2	2	18	72	1.26603	0	0	0
37421	chr2	GRMZM5G883080	GRMZM5G883080	246	2	2	6	12	1.26603	0	0	0
41787	chr3	GRMZM2G110072	GRMZM2G110072	1520	2	2	6	12	1.26603	0	0	0
51098	chr4	GRMZM2G010251	GRMZM2G010251	1904	2	2	6	12	1.26603	0	0	0
55755	chr4	GRMZM2G312399	GRMZM2G312399	983	2	2	6	12	1.26603	0	0	0
69327	chr5	GRMZM2G450327	GRMZM2G450327	839	2	2	6	12	1.26603	0	0	0
82675	chr6	GRMZM5G877425	GRMZM5G877425	262	2	2	6	12	1.26603	0	0	0
91088	chr7	GRMZM5G825955	GRMZM5G825955	311	2	2	6	12	1.26603	0	0	0
91621	chr7	GRMZM5G892627	GRMZM5G892627	1689	2	2	6	12	1.26603	0	0	0
93794	chr8	GRMZM2G045449	GRMZM2G045449	921	2	2	6	12	1.26603	0	0	0
102360	chr9	GRMZM2G001127	GRMZM2G001127	1405	3	3	9	18	1.26603	0	0	0
102491	chr9	GRMZM2G008033	GRMZM2G008033	977	2	4	12	12	1.26603	0	0	0
106008	chr9	GRMZM2G359033	GRMZM2G359033	819	2	2	6	12	1.26603	0	0	0
42669	chr3	GRMZM2G148087	GRMZM2G148087	2248	6	16	90	67	1.26603	0	0	0
30121	chr2	GRMZM2G151975	GRMZM2G151975	2041	2	5	22	21	1.26628	0	0	0
29575	chr2	GRMZM2G132388	GRMZM2G132388	378	4	4	9	15	1.26632	0	0	0
5112	chr10	GRMZM2G446108	GRMZM2G446108	2524	144	104	254	395	1.26644	0	0	0
3411	chr10	GRMZM2G142802	GRMZM2G142802	1233	606	436	910	1280	1.26645	0	0	0
7890	chr10	GRMZM5G890145	GRMZM5G890145	1182	606	436	910	1280	1.26645	0	0	0
23674	chr1	GRMZM5G856436	GRMZM5G856436	1208	63	54	88	113	1.26656	0	0	0
55109	chr4	GRMZM2G163813	GRMZM2G163813	2370	9	10	10	30	1.26656	0	0	0
76364	chr6	GRMZM2G087549	GRMZM2G087549	690	3140	2326	1537	3359	1.26663	0	0	0
87438	chr7	GRMZM2G323182	GRMZM2G323182	1564	19	29	58	56	1.26664	0	0	0
75853	chr6	GRMZM2G059836	GRMZM2G059836	831	53	172	1781	810	1.26666	0	0	0
13622	chr1	GRMZM2G106515	GRMZM2G106515	1551	178	176	323	471	1.26684	0	0	0
15756	chr1	GRMZM2G168222	GRMZM2G168222	2595	5	3	13	27	1.26688	0	0	0
12789	chr1	GRMZM2G080565	GRMZM2G080565	2236	16	11	30	49	1.2669	0	0	0
11938	chr1	kan1	GRMZM2G056400	1805	36	27	60	89	1.26693	0	0	0
16573	chr1	GRMZM2G322917	GRMZM2G322917	757	12	13	6	3	1.26694	0	0	0
109632	chr9	GRMZM5G858599	GRMZM5G858599	327	2	2	16	59	1.26702	0	0	0
79024	chr6	GRMZM2G392624	GRMZM2G392624	1831	8	14	36	33	1.26722	0	0	0
4648	chr10	GRMZM2G381483	GRMZM2G381483	1629	2	3	7	5	1.26726	0	0	0
18526	chr1	GRMZM2G457346	GRMZM2G457346	641	2	3	7	5	1.26726	0	0	0
23887	chr1	GRMZM5G872230	GRMZM5G872230	617	2	3	7	5	1.26726	0	0	0
25767	chr2	AC217385.3_FG009	AC217385.3_FG009	654	2	3	7	5	1.26726	0	0	0
44893	chr3	GRMZM2G437097	GRMZM2G437097	417	2	3	7	5	1.26726	0	0	0
54895	chr4	GRMZM2G155822	GRMZM2G155822	1281	2	3	7	5	1.26726	0	0	0
63944	chr5	GRMZM2G029636	GRMZM2G029636	632	2	3	7	5	1.26726	0	0	0
63945	chr5	GRMZM2G029647	GRMZM2G029647	166	2	3	7	5	1.26726	0	0	0
64974	chr5	GRMZM2G074417	GRMZM2G074417	768	2	3	7	5	1.26726	0	0	0
90897	chr7	GRMZM5G801823	GRMZM5G801823	606	2	3	7	5	1.26726	0	0	0
97774	chr8	GRMZM2G441397	GRMZM2G441397	1100	2	3	7	5	1.26726	0	0	0
97973	chr8	GRMZM2G467002	GRMZM2G467002	616	2	3	7	5	1.26726	0	0	0
51421	chr4	GRMZM2G020775	GRMZM2G020775	1780	276	351	543	497	1.26729	0	0	0
93898	chr8	GRMZM2G050692	GRMZM2G050692	1052	2	4	16	10	1.26731	0	0	0
67338	chr5	GRMZM2G164489	GRMZM2G164489	2131	5	12	58	43	1.26731	0	0	0
39428	chr3	GRMZM2G013378	GRMZM2G013378	2332	90	234	226	239	1.26734	0	0	0
109932	chr9	GRMZM5G891120	GRMZM5G891120	195	7	6	10	13	1.26738	0	0	0
26416	chr2	GRMZM2G018197	GRMZM2G018197	1835	168	277	788	521	1.26742	0	0	0
17887	chr1	GRMZM2G417410	GRMZM2G417410	1524	14	61	30	18	1.26743	0	0	0
79401	chr6	GRMZM2G436931	GRMZM2G436931	1695	14	7	37	81	1.26743	0	0	0
60789	chr4	GRMZM5G803334	GRMZM5G803334	718	71	61	172	311	1.26745	0	0	0
102643	chr9	GRMZM2G017537	GRMZM2G017537	1650	60	48	101	148	1.26754	0	0	0
97928	chr8	GRMZM2G461793	GRMZM2G461793	1863	160	233	385	156	1.26766	0	0	0
64538	chr5	GRMZM2G056762	GRMZM2G056762	1380	153	330	223	167	1.26791	0	0	0
77592	chr6	GRMZM2G148461	GRMZM2G148461	1709	4	14	118	96	1.26808	0	0	0
5104	chr10	GRMZM2G444519	GRMZM2G444519	741	2	2	8	19	1.26812	0	0	0
11627	chr1	GRMZM2G046542	GRMZM2G046542	276	2	2	8	19	1.26812	0	0	0
40710	chr3	GRMZM2G062718	GRMZM2G062718	1776	2	2	8	19	1.26812	0	0	0
87008	chr7	GRMZM2G167900	GRMZM2G167900	1284	2	2	8	19	1.26812	0	0	0
9694	chr1	AC214658.3_FG009	AC214658.3_FG009	225	2	2	9	23	1.26816	0	0	0
15231	chr1	GRMZM2G152901	GRMZM2G152901	1908	2	2	9	23	1.26816	0	0	0
82039	chr6	GRMZM5G806886	GRMZM5G806886	306	2	2	9	23	1.26816	0	0	0
43165	chr3	GRMZM2G169878	GRMZM2G169878	1916	169	400	267	199	1.26817	0	0	0
41133	chr3	GRMZM2G081090	GRMZM2G081090	1167	5	4	11	19	1.26831	0	0	0
82291	chr6	GRMZM5G833747	GRMZM5G833747	1685	94	61	237	469	1.26841	0	0	0
26020	chr2	GRMZM2G003563	GRMZM2G003563	2367	4	3	9	16	1.26856	0	0	0
69168	chr5	GRMZM2G430526	GRMZM2G430526	1266	2	8	8	9	1.26857	0	0	0
102394	chr9	GRMZM2G004128	GRMZM2G004128	1645	104	204	643	578	1.26875	0	0	0
33070	chr2	GRMZM2G474367	GRMZM2G474367	1220	6	5	8	10	1.26887	0	0	0
67793	chr5	GRMZM2G303331	GRMZM2G303331	1604	10	17	49	35	1.26888	0	0	0
96766	chr8	GRMZM2G327400	GRMZM2G327400	1563	7	5	24	56	1.26893	0	0	0
76241	chr6	GRMZM2G079287	GRMZM2G079287	2013	16	15	32	50	1.26896	0	0	0
64418	chr5	GRMZM2G051079	GRMZM2G051079	3030	21	13	54	109	1.26908	0	0	0
65252	chr5	GRMZM2G084942	GRMZM2G084942	3968	105	381	363	386	1.2691	0	0	0
3837	chr10	GRMZM2G170291	GRMZM2G170291	1889	5	4	14	28	1.2691	0	0	0
15192	chr1	GRMZM2G151576	GRMZM2G151576	1493	246	223	361	469	1.26917	0	0	0
13199	chr1	GRMZM2G092595	GRMZM2G092595	4046	1184	1499	2387	2078	1.2693	0	0	0
11544	chr1	GRMZM2G043832	GRMZM2G043832	828	5	12	53	47	1.26933	0	0	0
11114	chr1	GRMZM2G031523	GRMZM2G031523	2820	13	31	168	105	1.26939	0	0	0
76794	chr6	GRMZM2G108480	GRMZM2G108480	1011	821	859	849	1704	1.26942	0	0	0
103221	chr9	GRMZM2G051545	GRMZM2G051545	1560	33	27	111	247	1.26945	0	0	0
15901	chr1	GRMZM2G172584	GRMZM2G172584	885	32	20	12	12	1.26952	0	0	0
19439	chr1	GRMZM2G496660	GRMZM2G496660	264	8	5	3	3	1.26952	0	0	0
27870	chr2	GRMZM2G068590	GRMZM2G068590	1018	839	396	173	199	1.26952	0	0	0
41442	chr3	GRMZM2G093060	GRMZM2G093060	223	2	2	17	64	1.26955	0	0	0
40765	chr3	GRMZM2G065197	GRMZM2G065197	1633	4	4	15	34	1.26966	0	0	0
2847	chr10	GRMZM2G104620	GRMZM2G104620	2110	15	14	32	52	1.26967	0	0	0
19231	chr1	GRMZM2G490888	GRMZM2G490888	1170	3	4	7	6	1.26969	0	0	0
54396	chr4	GRMZM2G137644	GRMZM2G137644	918	3	4	7	6	1.26969	0	0	0
55284	chr4	GRMZM2G169927	GRMZM2G169927	2950	12	145	43	17	1.26996	0	0	0
86333	chr7	GRMZM2G130938	GRMZM2G130938	877	4	3	11	22	1.27	0	0	0
7800	chr10	GRMZM5G878018	GRMZM5G878018	857	3	2	7	13	1.27008	0	0	0
73063	chr5	GRMZM5G852073	GRMZM5G852073	780	6	4	14	26	1.27008	0	0	0
80687	chr6	GRMZM2G531064	GRMZM2G531064	1102	3	2	7	13	1.27008	0	0	0
88052	chr7	GRMZM2G403426	GRMZM2G403426	1556	3	2	7	13	1.27008	0	0	0
91100	chr7	GRMZM5G827455	GRMZM5G827455	1482	3	2	7	13	1.27008	0	0	0
97446	chr8	GRMZM2G401587	GRMZM2G401587	525	3	2	7	13	1.27008	0	0	0
94583	chr8	GRMZM2G085038	GRMZM2G085038	1466	7	14	43	43	1.27012	0	0	0
104158	chr9	GRMZM2G104347	GRMZM2G104347	1858	8	28	250	193	1.2702	0	0	0
105179	chr9	GRMZM2G160005	GRMZM2G160005	3860	8	5	48	162	1.27024	0	0	0
2470	chr10	GRMZM2G079913	GRMZM2G079913	2125	4	12	94	60	1.27028	0	0	0
27195	chr2	GRMZM2G045398	GRMZM2G045398	1005	2	2	10	27	1.2703	0	0	0
61044	chr4	GRMZM5G827271	GRMZM5G827271	485	2	5	26	20	1.27043	0	0	0
31950	chr2	GRMZM2G378479	GRMZM2G378479	4276	11	8	30	60	1.27043	0	0	0
1979	chr10	GRMZM2G046583	GRMZM2G046583	2292	58	53	106	157	1.27049	0	0	0
26182	chr2	GRMZM2G009289	GRMZM2G009289	699	108	170	365	349	1.2706	0	0	0
87926	chr7	GRMZM2G384516	GRMZM2G384516	1416	3	3	10	21	1.2706	0	0	0
4842	chr10	GRMZM2G410083	GRMZM2G410083	840	2	5	3	2	1.27067	0	0	0
7280	chr10	GRMZM5G805382	GRMZM5G805382	795	2	5	3	2	1.27067	0	0	0
16546	chr1	GRMZM2G321650	GRMZM2G321650	1018	2	5	3	2	1.27067	0	0	0
29451	chr2	GRMZM2G127184	GRMZM2G127184	1870	2	5	3	2	1.27067	0	0	0
30361	chr2	GRMZM2G160116	GRMZM2G160116	270	2	5	3	2	1.27067	0	0	0
37194	chr2	GRMZM5G866678	GRMZM5G866678	1315	2	5	3	2	1.27067	0	0	0
39611	chr3	GRMZM2G020732	GRMZM2G020732	1542	2	5	3	2	1.27067	0	0	0
42871	chr3	GRMZM2G157888	GRMZM2G157888	1648	2	5	3	2	1.27067	0	0	0
48780	chr3	nad1	GRMZM5G856633	1922	2	5	3	2	1.27067	0	0	0
55710	chr4	GRMZM2G309524	GRMZM2G309524	890	2	5	3	2	1.27067	0	0	0
58012	chr4	GRMZM2G497523	GRMZM2G497523	322	2	5	3	2	1.27067	0	0	0
61726	chr4	GRMZM5G893611	GRMZM5G893611	456	2	5	3	2	1.27067	0	0	0
77088	chr6	GRMZM2G124877	GRMZM2G124877	689	2	5	3	2	1.27067	0	0	0
79027	chr6	GRMZM2G392918	GRMZM2G392918	1253	2	5	3	2	1.27067	0	0	0
81354	chr6	GRMZM2G565929	GRMZM2G565929	95	2	5	3	2	1.27067	0	0	0
81425	chr6	GRMZM2G568504	GRMZM2G568504	104	2	5	3	2	1.27067	0	0	0
81986	chr6	GRMZM5G800409	GRMZM5G800409	1236	2	5	3	2	1.27067	0	0	0
85726	chr7	GRMZM2G096204	GRMZM2G096204	1044	2	5	3	2	1.27067	0	0	0
86825	chr7	GRMZM2G156821	GRMZM2G156821	687	2	5	3	2	1.27067	0	0	0
88040	chr7	GRMZM2G402650	GRMZM2G402650	1430	2	5	3	2	1.27067	0	0	0
99434	chr8	GRMZM2G547449	GRMZM2G547449	231	2	5	3	2	1.27067	0	0	0
100089	chr8	GRMZM2G581460	GRMZM2G581460	600	2	5	3	2	1.27067	0	0	0
100842	chr8	GRMZM5G845191	GRMZM5G845191	220	2	5	3	2	1.27067	0	0	0
105757	chr9	GRMZM2G325511	GRMZM2G325511	960	2	5	3	2	1.27067	0	0	0
53221	chr4	GRMZM2G093316	GRMZM2G093316	3979	155	110	323	549	1.27101	0	0	0
86921	chr7	GRMZM2G162396	GRMZM2G162396	923	4	10	63	36	1.27105	0	0	0
66181	chr5	GRMZM2G119890	GRMZM2G119890	1175	5	20	19	20	1.27114	0	0	0
13537	chr1	GRMZM2G103258	GRMZM2G103258	2279	124	106	283	487	1.27124	0	0	0
94497	chr8	GRMZM2G080936	GRMZM2G080936	980	2	4	13	12	1.27126	0	0	0
39121	chr3	EF517601.1_FG012	EF517601.1_FG012	2364	48	104	448	325	1.27128	0	0	0
55658	chr4	GRMZM2G305426	GRMZM2G305426	1755	42	41	76	110	1.2713	0	0	0
92919	chr8	GRMZM2G002023	GRMZM2G002023	2755	132	109	287	483	1.27136	0	0	0
39359	chr3	GRMZM2G010447	GRMZM2G010447	1287	1044	1169	627	354	1.27146	0	0	0
65815	chr5	GRMZM2G105844	GRMZM2G105844	1838	3	2	17	54	1.27159	0	0	0
40937	chr3	GRMZM2G072052	GRMZM2G072052	991	3	2	8	16	1.27165	0	0	0
66224	chr5	GRMZM2G121309	GRMZM2G121309	1895	3	2	8	16	1.27165	0	0	0
23415	chr1	GRMZM5G837520	GRMZM5G837520	374	7	4	2	7	1.27167	0	0	0
67703	chr5	NAR2.1	GRMZM2G179294	1041	3	2	26	107	1.27178	0	0	0
13443	chr1	GRMZM2G099860	GRMZM2G099860	3972	175	370	364	377	1.27194	0	0	0
86860	chr7	GRMZM2G159221	GRMZM2G159221	1768	52	44	109	178	1.27202	0	0	0
57819	chr4	GRMZM2G490575	GRMZM2G490575	102	54	11	2	2	1.27205	0	0	0
24093	chr1	GRMZM5G884466	GRMZM5G884466	3318	221	191	407	611	1.27209	0	0	0
18157	chr1	GRMZM2G435274	GRMZM2G435274	460	15	21	41	34	1.27218	0	0	0
73494	chr5	RPL19	GRMZM5G887054	1511	188	285	716	490	1.27219	0	0	0
93544	chr8	GRMZM2G032551	GRMZM2G032551	2458	2	2	18	69	1.2722	0	0	0
10116	chr1	GRMZM2G003656	GRMZM2G003656	3207	119	93	210	314	1.27222	0	0	0
78944	chr6	GRMZM2G383564	GRMZM2G383564	1760	1574	1228	2857	4347	1.27228	0	0	0
66987	chr5	GRMZM2G151144	GRMZM2G151144	384	2	2	14	46	1.27228	0	0	0
66436	chr5	GRMZM2G128929	GRMZM2G128929	1583	6	3	16	34	1.2723	0	0	0
66439	chr5	GRMZM2G128974	GRMZM2G128974	1783	6	3	16	34	1.2723	0	0	0
27457	chr2	GRMZM2G053434	GRMZM2G053434	1701	8	8	20	35	1.27248	0	0	0
54061	chr4	GRMZM2G124151	GRMZM2G124151	1877	8	6	14	21	1.27249	0	0	0
54317	chr4	GRMZM2G133988	GRMZM2G133988	1499	7	4	16	30	1.27252	0	0	0
55476	chr4	GRMZM2G177720	GRMZM2G177720	1069	289	368	570	534	1.27261	0	0	0
64147	chr5	GRMZM2G038882	GRMZM2G038882	3039	42	58	101	97	1.27263	0	0	0
106865	chr9	GRMZM2G469944	GRMZM2G469944	409	55	23	9	10	1.27264	0	0	0
76967	chr6	GRMZM2G118344	GRMZM2G118344	4819	307	285	454	699	1.27275	0	0	0
84580	chr7	GRMZM2G033027	GRMZM2G033027	1574	3	6	20	18	1.27279	0	0	0
60781	chr4	GRMZM5G802633	GRMZM5G802633	257	8	7	13	18	1.27279	0	0	0
53991	chr4	GRMZM2G122404	GRMZM2G122404	501	4	3	8	13	1.27291	0	0	0
71638	chr5	GRMZM2G562463	GRMZM2G562463	267	4	3	8	13	1.27291	0	0	0
24327	chr2	AC148152.3_FG006	AC148152.3_FG006	1047	3	2	6	10	1.27302	0	0	0
31809	chr2	GRMZM2G367115	GRMZM2G367115	1058	3	2	6	10	1.27302	0	0	0
86997	chr7	Bk2L7	GRMZM2G167497	1797	3	2	6	10	1.27302	0	0	0
96814	chr8	GRMZM2G333541	GRMZM2G333541	1198	3	2	6	10	1.27302	0	0	0
97124	chr8	GRMZM2G367701	GRMZM2G367701	1554	3	2	6	10	1.27302	0	0	0
105758	chr9	GRMZM2G325525	GRMZM2G325525	636	3	2	6	10	1.27302	0	0	0
109730	chr9	GRMZM5G870157	GRMZM5G870157	294	5	11	57	33	1.27305	0	0	0
91411	chr7	GRMZM5G867438	GRMZM5G867438	1136	21	14	46	81	1.27312	0	0	0
3670	chr10	GRMZM2G156174	GRMZM2G156174	3232	67	97	184	175	1.27323	0	0	0
13565	chr1	GRMZM2G104124	GRMZM2G104124	705	2	2	7	15	1.27332	0	0	0
28176	chr2	GRMZM2G079456	GRMZM2G079456	220	2	2	7	15	1.27332	0	0	0
50055	chr4	AC199779.3_FG005	AC199779.3_FG005	960	2	2	7	15	1.27332	0	0	0
52332	chr4	GRMZM2G059445	GRMZM2G059445	1513	2	2	7	15	1.27332	0	0	0
62529	chr5	AC206700.3_FG003	AC206700.3_FG003	687	2	2	7	15	1.27332	0	0	0
72907	chr5	GRMZM5G838902	GRMZM5G838902	894	2	2	7	15	1.27332	0	0	0
76197	chr6	GRMZM2G076943	GRMZM2G076943	2334	2	2	7	15	1.27332	0	0	0
76652	chr6	GRMZM2G101702	GRMZM2G101702	886	2	2	7	15	1.27332	0	0	0
79031	chr6	GRMZM2G393428	GRMZM2G393428	798	2	2	7	15	1.27332	0	0	0
87616	chr7	GRMZM2G347402	GRMZM2G347402	2478	2	2	7	15	1.27332	0	0	0
98587	chr8	GRMZM2G505907	GRMZM2G505907	374	2	2	7	15	1.27332	0	0	0
77128	chr6	GRMZM2G127120	GRMZM2G127120	3129	5	4	10	16	1.27333	0	0	0
43098	chr3	GRMZM2G166646	GRMZM2G166646	2051	683	599	1337	2068	1.27367	0	0	0
52282	chr4	GRMZM2G057504	GRMZM2G057504	1506	12	20	49	45	1.27368	0	0	0
15930	chr1	GRMZM2G173819	GRMZM2G173819	1537	10	9	17	24	1.27371	0	0	0
2026	chr10	GRMZM2G049979	GRMZM2G049979	3769	21	42	156	120	1.27387	0	0	0
13482	chr1	GRMZM2G101052	GRMZM2G101052	1314	8	6	27	60	1.27409	0	0	0
51968	chr4	GRMZM2G045364	GRMZM2G045364	2138	15	10	33	58	1.27413	0	0	0
100217	chr8	GRMZM2G586687	GRMZM2G586687	665	32	36	10	3	1.27433	0	0	0
95311	chr8	GRMZM2G120868	GRMZM2G120868	694	4	2	12	27	1.27443	0	0	0
52146	chr4	GRMZM2G052670	GRMZM2G052670	2341	58	50	102	148	1.27474	0	0	0
53559	chr4	GRMZM2G106349	GRMZM2G106349	754	7	6	17	30	1.27491	0	0	0
763	chr10	AC202000.4_FG003	AC202000.4_FG003	612	3	2	9	19	1.27504	0	0	0
27331	chr2	GRMZM2G049608	GRMZM2G049608	4381	3	2	9	19	1.27504	0	0	0
54713	chr4	GRMZM2G149089	GRMZM2G149089	611	2	9	4	2	1.27516	0	0	0
58753	chr4	GRMZM2G524912	GRMZM2G524912	407	2	9	4	2	1.27516	0	0	0
76455	chr6	GRMZM2G092258	GRMZM2G092258	2654	363	316	539	704	1.27521	0	0	0
66066	chr5	GRMZM2G114888	GRMZM2G114888	3106	40	86	376	275	1.27526	0	0	0
84491	chr7	GRMZM2G028756	GRMZM2G028756	2398	5	7	15	11	1.27527	0	0	0
95051	chr8	GRMZM2G108851	GRMZM2G108851	3808	23	20	142	438	1.27529	0	0	0
56785	chr4	GRMZM2G407913	GRMZM2G407913	1991	4	8	33	22	1.27536	0	0	0
72482	chr5	GRMZM5G801969	GRMZM5G801969	538	2	2	16	56	1.27548	0	0	0
1548	chr10	GRMZM2G019246	GRMZM2G019246	2381	1107	1695	3872	3234	1.27551	0	0	0
16786	chr1	GRMZM2G339162	GRMZM2G339162	2853	2	4	14	12	1.27556	0	0	0
29471	chr2	GRMZM2G127826	GRMZM2G127826	563	2	4	14	12	1.27556	0	0	0
43291	chr3	a4	GRMZM2G176576	2341	34	17	95	203	1.27575	0	0	0
69334	chr5	GRMZM2G451314	GRMZM2G451314	1975	624	433	1038	1518	1.2759	0	0	0
86152	chr7	GRMZM2G117878	GRMZM2G117878	1573	3	5	16	10	1.27619	0	0	0
88184	chr7	GRMZM2G418153	GRMZM2G418153	1933	3	5	16	10	1.27619	0	0	0
11432	chr1	GRMZM2G041281	GRMZM2G041281	419	3	9	5	3	1.2762	0	0	0
60237	chr4	GRMZM2G576764	GRMZM2G576764	297	3	9	5	3	1.2762	0	0	0
2550	chr10	GRMZM2G086030	GRMZM2G086030	5637	2065	1494	4182	6817	1.27627	0	0	0
39950	chr3	GRMZM2G034083	GRMZM2G034083	1800	189	175	495	896	1.27631	0	0	0
31463	chr2	GRMZM2G340359	GRMZM2G340359	3087	16	11	44	87	1.27645	0	0	0
74974	chr6	GRMZM2G012021	GRMZM2G012021	2285	32	32	75	125	1.27651	0	0	0
62757	chr5	AC210013.4_FG013	AC210013.4_FG013	1569	8	6	18	31	1.27654	0	0	0
78777	chr6	GRMZM2G364982	GRMZM2G364982	1233	23	15	54	98	1.27677	0	0	0
28636	chr2	GRMZM2G095464	GRMZM2G095464	1183	12	8	80	270	1.27683	0	0	0
11117	chr1	GRMZM2G031572	GRMZM2G031572	2551	83	72	262	536	1.27704	0	0	0
68320	chr5	GRMZM2G356938	GRMZM2G356938	1606	39	24	116	245	1.27706	0	0	0
75745	chr6	GRMZM2G054070	GRMZM2G054070	2997	4	3	15	35	1.27708	0	0	0
66249	chr5	GRMZM2G122218	GRMZM2G122218	754	2	2	18	67	1.27712	0	0	0
31957	chr2	GRMZM2G379252	GRMZM2G379252	2503	43	69	159	149	1.27726	0	0	0
76702	chr6	GRMZM2G103272	GRMZM2G103272	2585	2	6	44	35	1.27733	0	0	0
40552	chr3	GRMZM2G057853	GRMZM2G057853	2127	22	21	41	60	1.27752	0	0	0
1690	chr10	GRMZM2G028492	GRMZM2G028492	1994	186	132	312	454	1.27765	0	0	0
40676	chr3	GRMZM2G061830	GRMZM2G061830	1677	55	42	162	325	1.27782	0	0	0
69190	chr5	GRMZM2G432480	GRMZM2G432480	1246	15	32	128	108	1.27794	0	0	0
12366	chr1	GRMZM2G068868	GRMZM2G068868	1860	3	6	22	18	1.27801	0	0	0
51989	chr4	GRMZM2G046067	GRMZM2G046067	1315	5	7	13	12	1.27804	0	0	0
53356	chr4	GRMZM2G099088	GRMZM2G099088	1782	4	10	50	45	1.27805	0	0	0
51876	chr4	GRMZM2G041885	GRMZM2G041885	2327	139	102	273	433	1.27811	0	0	0
16327	chr1	GRMZM2G306714	GRMZM2G306714	498	11	20	63	51	1.27815	0	0	0
30684	chr2	GRMZM2G172101	GRMZM2G172101	4279	145	216	526	381	1.2785	0	0	0
67146	chr5	GRMZM2G158277	GRMZM2G158277	1798	31	44	92	74	1.27857	0	0	0
23601	chr1	GRMZM5G851328	GRMZM5G851328	489	2	2	9	22	1.27866	0	0	0
29525	chr2	GRMZM2G130406	GRMZM2G130406	728	2	2	9	22	1.27866	0	0	0
31812	chr2	GRMZM2G367251	GRMZM2G367251	1761	2	2	9	22	1.27866	0	0	0
43353	chr3	GRMZM2G179170	GRMZM2G179170	581	2	2	9	22	1.27866	0	0	0
104638	chr9	GRMZM2G128953	GRMZM2G128953	1335	2	2	9	22	1.27866	0	0	0
109081	chr9	GRMZM2G704308	GRMZM2G704308	444	2	2	9	22	1.27866	0	0	0
76905	chr6	GRMZM2G115398	GRMZM2G115398	1725	66	59	139	221	1.27868	0	0	0
26263	chr2	GRMZM2G011404	GRMZM2G011404	3321	6	3	42	152	1.27876	0	0	0
40531	chr3	GRMZM2G056702	GRMZM2G056702	2072	108	78	310	616	1.27896	0	0	0
24386	chr2	AC177924.2_FG003	AC177924.2_FG003	336	2	2	23	98	1.27897	0	0	0
48460	chr3	GRMZM5G830189	GRMZM5G830189	621	1929	1028	536	560	1.27908	0	0	0
79704	chr6	GRMZM2G470478	GRMZM2G470478	342	2	4	15	12	1.27912	0	0	0
24206	chr1	GRMZM5G892535	GRMZM5G892535	327	4	20	628	216	1.27918	0	0	0
78290	chr6	GRMZM2G305851	GRMZM2G305851	1758	718	1748	1737	1774	1.27925	0	0	0
4792	chr10	GRMZM2G404367	GRMZM2G404367	1361	9	8	16	23	1.27926	0	0	0
12432	chr1	GRMZM2G070271	GRMZM2G070271	1562	53	152	1100	821	1.27934	0	0	0
49113	chr3	GRMZM5G886177	GRMZM5G886177	1062	5	34	34	36	1.27941	0	0	0
85641	chr7	GRMZM2G090744	GRMZM2G090744	2368	4	3	14	31	1.27949	0	0	0
87956	chr7	GRMZM2G390025	GRMZM2G390025	1647	4	3	14	31	1.27949	0	0	0
17789	chr1	GRMZM2G412430	GRMZM2G412430	2052	4	4	12	23	1.27949	0	0	0
28714	chr2	GRMZM2G098545	GRMZM2G098545	1388	1824	2315	3682	3370	1.27973	0	0	0
77227	chr6	GRMZM2G131828	GRMZM2G131828	561	7	18	11	7	1.27974	0	0	0
54152	chr4	GRMZM2G126453	GRMZM2G126453	3217	267	217	518	796	1.2799	0	0	0
10948	chr1	GRMZM2G027088	GRMZM2G027088	487	8	5	3	8	1.27991	0	0	0
1929	chr10	GRMZM2G042995	GRMZM2G042995	2019	5	4	8	11	1.27995	0	0	0
70246	chr5	GRMZM2G510135	GRMZM2G510135	1584	5	4	8	11	1.27995	0	0	0
73117	chr5	GRMZM5G857140	GRMZM5G857140	1584	5	4	8	11	1.27995	0	0	0
16976	chr1	GRMZM2G351346	GRMZM2G351346	628	5	9	34	21	1.28013	0	0	0
73427	chr5	GRMZM5G881347	GRMZM5G881347	630	2	5	25	23	1.28017	0	0	0
56286	chr4	GRMZM2G360835	GRMZM2G360835	3772	74	68	204	377	1.28018	0	0	0
65009	chr5	GRMZM2G075333	GRMZM2G075333	2435	27	19	215	780	1.2802	0	0	0
59276	chr4	sig2	GRMZM2G543629	2628	1819	1428	2676	3511	1.28027	0	0	0
52960	chr4	GRMZM2G082644	GRMZM2G082644	552	16	22	42	36	1.28031	0	0	0
95431	chr8	GRMZM2G126977	GRMZM2G126977	782	89	153	507	339	1.2804	0	0	0
82351	chr6	GRMZM5G839603	GRMZM5G839603	376	2	5	31	21	1.28048	0	0	0
94678	chr8	GRMZM2G089355	GRMZM2G089355	1573	16	10	33	55	1.28061	0	0	0
74958	chr6	GRMZM2G011222	GRMZM2G011222	1055	14	13	20	25	1.28091	0	0	0
63994	chr5	GRMZM2G031983	GRMZM2G031983	1194	50	26	202	516	1.28095	0	0	0
13492	chr1	GRMZM2G101245	GRMZM2G101245	1829	2	2	11	30	1.281	0	0	0
37307	chr2	GRMZM5G874869	GRMZM5G874869	774	2	2	14	44	1.28102	0	0	0
15300	chr1	GRMZM2G154290	GRMZM2G154290	525	2	4	13	13	1.28119	0	0	0
44884	chr3	GRMZM2G436295	GRMZM2G436295	826	2	2	15	49	1.28143	0	0	0
48608	chr3	GRMZM5G843352	GRMZM5G843352	826	2	2	15	49	1.28143	0	0	0
22082	chr1	GRMZM2G574383	GRMZM2G574383	551	5	10	7	5	1.28157	0	0	0
3512	chr10	GRMZM2G149216	GRMZM2G149216	1688	3	7	37	27	1.28163	0	0	0
26543	chr2	GRMZM2G022162	GRMZM2G022162	1121	4	3	10	18	1.28168	0	0	0
86874	chr7	GRMZM2G160569	GRMZM2G160569	1986	37	38	37	628	1.28169	0	0	0
79714	chr6	GRMZM2G472194	GRMZM2G472194	823	3	4	8	6	1.28181	0	0	0
94182	chr8	GRMZM2G065294	GRMZM2G065294	475	3	4	8	6	1.28181	0	0	0
93919	chr8	GRMZM2G051767	GRMZM2G051767	1875	259	212	358	448	1.28199	0	0	0
48285	chr3	GRMZM5G815165	GRMZM5G815165	2635	51	32	174	387	1.28206	0	0	0
32831	chr2	GRMZM2G453879	GRMZM2G453879	1472	2	4	16	12	1.2821	0	0	0
44542	chr3	GRMZM2G401934	GRMZM2G401934	2040	51	41	134	245	1.28213	0	0	0
82617	chr6	zma-MIR164b	GRMZM5G870920	128	3	2	14	37	1.28217	0	0	0
85991	chr7	GRMZM2G109405	GRMZM2G109405	2140	7	18	96	88	1.28218	0	0	0
95661	chr8	GRMZM2G138840	GRMZM2G138840	2010	28	19	50	75	1.28238	0	0	0
13008	chr1	GRMZM2G087161	GRMZM2G087161	2552	29	46	118	95	1.28241	0	0	0
84845	chr7	GRMZM2G048210	GRMZM2G048210	2560	25	54	210	198	1.28249	0	0	0
451	chr10	AC194485.3_FG002	AC194485.3_FG002	501	2	3	6	6	1.28251	0	0	0
1617	chr10	GRMZM2G023516	GRMZM2G023516	292	2	2	4	6	1.28251	0	0	0
1729	chr10	GRMZM2G031278	GRMZM2G031278	1609	2	2	4	6	1.28251	0	0	0
1759	chr10	GRMZM2G032592	GRMZM2G032592	423	2	2	4	6	1.28251	0	0	0
2171	chr10	GRMZM2G060525	GRMZM2G060525	363	2	2	4	6	1.28251	0	0	0
2732	chr10	GRMZM2G097636	GRMZM2G097636	1179	2	2	4	6	1.28251	0	0	0
3210	chr10	GRMZM2G129133	GRMZM2G129133	980	2	2	4	6	1.28251	0	0	0
4129	chr10	GRMZM2G306348	GRMZM2G306348	3771	2	2	4	6	1.28251	0	0	0
[truncated: 3,274 more rows]
