# Supplementary material for: Time Series Expression Analyses Using RNA-seq: A Statistical Approach
Source: Biomed Res Int. 2013 Mar 24;2013:203681. doi: 10.1155/2013/203681 (PMC3622290; doi:10.1155/2013/203681)
Supplement: Supplementary file 1 — Supplementary Table 1: Temporally differentially expressed gene sets detected by statistical evolutionary trajectory index (SETI) where the Benjamini-Hochberg FDR is controlled at < 0.05 in maize data Supplementary Table 2: Temporally differentially expressed gene sets detected by statistical evolutionary trajectory index (SETI) where the Benjamini-Hochberg FDR is controlled at < 0.05 in zebrafish data Supplementary Table 3: Temporally differentially expressed gene sets detected by Poisson AR(1) model in maize data Supplementary Table 4: Temporally differentially expressed gene sets detected by Poisson AR(1) model in zebrafish data [file 203681.f1.zip › SUPPLEMENTARY-DATA-JBB/SUPPLE-TABLE-2.xlsx]

## Sheet: Sheet1
gene_anno	chrom	start	end	locus.ID.1	transcript.IDs	2-4 cell	1000 cell	dome	shield	bud	28 hpf	48 hpf	5 dpf	TRJ_IND	rawp-bsp	bonp-bsp	bhp-bsp
XLOC_024738	chr22	5681810	5746208	XLOC_024738	Zv9_00050646 Zv9_00050645	123.907	20.2625	25.8577	26.0977	33.0579	27.5529	21.6524	18.4924	1.09543	0	0	0
XLOC_012599	chr10	39042039	39042311	XLOC_012599	Zv9_00025666	8.11875	13.7728	16.5494	17.6299	21.6386	23.0865	18.7991	87.8441	1.09692	0	0	0
XLOC_000800	chr1	20694869	20716797	XLOC_000800	Zv9_00001740	70.7793	1.67396	3.80308	11.8925	13.274	12.0705	9.9802	2.42314	1.09808	0	0	0
XLOC_025089	chr22	42215464	42219525	XLOC_025089	Zv9_00051402	0.0680531	0.083972	0.751519	1.15092	0.769396	0.446209	0.438689	6.67885	1.10264	0	0	0
XLOC_010432	chr8	28822298	28824204	XLOC_010432	Zv9_00021156	0.182432	0	4.88048	0.715689	1.14646	0.0434246	0	0	1.1028	0	0	0
XLOC_004897	chr4	15109195	15109561	XLOC_004897	Zv9_00009749	0	0	20.0656	3.7804	4.71726	0.202524	0	0	1.10311	0	0	0
XLOC_023469	chr21	31936369	32002885	XLOC_023469	Zv9_00048170 Zv9_00048169 Zv9_00048171 Zv9_00048172	0.862744	1.10473	2.73181	4.10745	2.80317	1.46381	0.923334	18.0541	1.10349	0	0	0
XLOC_017146	chr15	42966022	42981803	XLOC_017146	Zv9_00035206	60.8256	5.42436	5.89534	5.31393	9.70864	5.97903	4.44914	1.56471	1.10365	0	0	0
XLOC_001808	chr2	54479500	54606353	XLOC_001808	Zv9_00003790 Zv9_00003789 Zv9_00003788	3.7086	0	0.194094	0.20397	0.214177	0.139327	0.0802998	0.094646	1.10405	0	0	0
XLOC_003328	chr3	4161598	4161764	XLOC_003328	Zv9_00006819	0	0	0	84.3582	0	8.0797	11.2782	0	1.10518	0	0	0
XLOC_021295	chr19	38669340	38683045	XLOC_021295	Zv9_00043726	100.217	2.48311	4.90668	15.0793	25.2351	27.0461	22.7405	18.2828	1.1053	0	0	0
XLOC_020206	chr18	19232738	19233104	XLOC_020206	Zv9_00041568	0	0.602141	2.68083	19.2583	14.0217	14.4019	9.6821	174.274	1.10638	0	0	0
XLOC_027862	Zv9_NA122	1	13260	XLOC_027862	Zv9_00057280 Zv9_00057284 Zv9_00057282 Zv9_00057281 Zv9_00057283	4.14979	10.4442	34.8189	43.9381	43.9086	50.628	47.7463	162.35	1.10714	0	0	0
XLOC_022306	chr20	34686163	34687806	XLOC_022306	Zv9_00045827	0	1.45076	0	25.5866	0	0	3.85392	0	1.10896	0	0	0
XLOC_022178	chr20	25592717	25641408	XLOC_022178	Zv9_00045555 Zv9_00045558 Zv9_00045556 Zv9_00045554	0.80948	1.41723	4.10096	10.653	6.50335	2.79933	2.44744	52.4838	1.10996	0	0	0
XLOC_018895	chr17	41	3875	XLOC_018895	Zv9_00038902 Zv9_00038903 Zv9_00038901	365.144	103.506	79.9428	83.6955	85.8831	65.78	44.5071	21.1747	1.11004	0	0	0
XLOC_023179	chr21	5320015	5331975	XLOC_023179	Zv9_00047588	100.975	113.007	313.394	463.185	325.952	642.557	818.56	1044.35	1.11009	0	0	0
XLOC_001092	chr1	54475765	54485895	XLOC_001092	Zv9_00002361 Zv9_00002362	7.25422	38.4922	27.4788	23.1723	16.2745	8.88291	8.31383	3.64645	1.11031	0	0	0
XLOC_018906	chr17	281521	282281	XLOC_018906	Zv9_00038924	70.9673	7.1466	7.18714	16.4549	17.9521	10.7711	8.65449	2.76843	1.11118	0	0	0
XLOC_014764	chr13	2173872	2203666	XLOC_014764	Zv9_00030267 Zv9_00030268 Zv9_00030266	2.6211	4.72218	4.97061	2.26332	17.9504	7.95835	6.25668	3.45872	1.11194	0	0	0
XLOC_018140	chr16	42967512	43005549	XLOC_018140	Zv9_00037319 Zv9_00037318	0.306789	0.431065	5.8725	16.993	3.43746	10.3638	8.55412	6.88377	1.11349	0	0	0
XLOC_025272	chr23	18117085	18117555	XLOC_025272	Zv9_00051794	0	0.85801	0	0	4.83833	0.142405	0	0	1.11393	0	0	0
XLOC_017134	chr15	42613838	42623225	XLOC_017134	Zv9_00035181 Zv9_00035182	179.137	15.1894	17.9007	42.1431	48.919	28.9927	29.5818	7.91106	1.11412	0	0	0
XLOC_013842	chr12	14224537	14271342	XLOC_013842	Zv9_00028288 Zv9_00028290 Zv9_00028289 Zv9_00028282 Zv9_00028285 Zv9_00028286 Zv9_00028284 Zv9_00028283 Zv9_00028287	0	0.00411454	0	0	3.97861	0	0	0	1.11526	0	0	0
XLOC_000565	chr1	56776458	56793034	XLOC_000565	Zv9_00001194 Zv9_00001193	0	0	0	0	11.9097	0	0	0	1.11547	0	0	0
XLOC_000889	chr1	30734727	30762913	XLOC_000889	Zv9_00001944	0	0	0	0	2.82031	0	0	0	1.11547	0	0	0
XLOC_002788	chr3	23890706	23890908	XLOC_002788	Zv9_00005734	0	0	0	0	2.67213	0	0	0	1.11547	0	0	0
XLOC_010975	chr9	31401917	31402764	XLOC_010975	Zv9_00022274	0	0	0	0	4.08612	0	0	0	1.11547	0	0	0
XLOC_020471	chr18	49684082	49691040	XLOC_020471	Zv9_00042094	117.037	40.4718	35.2187	36.7185	42.5074	28.4405	26.9134	17.6449	1.11588	0	0	0
XLOC_009468	chr7	76829917	76837992	XLOC_009468	Zv9_00019243 Zv9_00019242 Zv9_00019244 Zv9_00019241	0	9.19577	7.15075	4.3085	2.11793	0.906728	1.05426	0	1.11619	0	0	0
XLOC_001511	chr2	27533665	27539726	XLOC_001511	Zv9_00003184	2.47868	18.4997	13.0938	11.5516	8.13226	3.61553	2.88799	1.82317	1.11755	0	0	0
XLOC_006354	chr5	27297291	27326972	XLOC_006354	Zv9_00012696 Zv9_00012693 Zv9_00012697 Zv9_00012694	3.66562	2.2144	1.99674	8.62323	1.6503	1.74863	1.16376	1.00028	1.11941	0	0	0
XLOC_017918	chr16	23884009	23937969	XLOC_017918	Zv9_00036850 Zv9_00036847 Zv9_00036851 Zv9_00036849 Zv9_00036848	1.43674	5.99485	7.88143	8.30669	34.5334	12.4166	12.9068	11.7785	1.12023	0	0	0
XLOC_028158	Zv9_scaffold3525	59978	64967	XLOC_028158	Zv9_00057750	86.6613	8.30123	8.91029	24.4447	22.0317	35.2795	34.4373	43.7267	1.12376	0	0	0
XLOC_023708	chr21	5811368	5818821	XLOC_023708	Zv9_00048594	0.866687	1.04961	9.3458	58.3699	8.16537	16.2695	25.1132	24.2127	1.1243	0	0	0
XLOC_025764	chr23	19186562	19196797	XLOC_025764	Zv9_00052864 Zv9_00052863 Zv9_00052865 Zv9_00052862	0	0	0	0	0	0	60.9369	28.1088	1.12453	0	0	0
XLOC_016062	chr14	31406099	31414519	XLOC_016062	Zv9_00032972 Zv9_00032971 Zv9_00032973	2.80217	0.42322	86.9984	10.6532	34.8883	2.66239	0.907684	0.16787	1.1257	0	0	0
XLOC_005519	chr5	25754867	25766744	XLOC_005519	Zv9_00010861 Zv9_00010862 Zv9_00010869 Zv9_00010868 Zv9_00010864 Zv9_00010863	0	0	0	0	0	0	64.6302	26.7044	1.12662	0	0	0
XLOC_028926	Zv9_NA866	30	15379	XLOC_028926	Zv9_00058712	0	0	0	0	0	0.394603	5.22045	2.04234	1.12852	0	0	0
XLOC_001881	chr2	59618645	59626974	XLOC_001881	Zv9_00003913 Zv9_00003911 Zv9_00003914 Zv9_00003912	0	0	0	23.4852	12.4032	13.6421	14.9004	19.511	1.12878	0	0	0
XLOC_024787	chr22	10001522	10006384	XLOC_024787	Zv9_00050755	2.26639	13.2065	8.24127	5.8014	3.6962	1.98039	2.0973	1.66448	1.12922	0	0	0
XLOC_013459	chr11	25119832	25125554	XLOC_013459	Zv9_00027493	0	0	0	0	0.292015	2.15185	26.4107	10.7334	1.12947	0	0	0
XLOC_025763	chr23	19038066	19069514	XLOC_025763	Zv9_00052861	0	0	0	0	0	0	17.4021	6.67195	1.13018	0	0	0
XLOC_000396	chr1	44979013	45022125	XLOC_000396	Zv9_00000846 Zv9_00000845 Zv9_00000847 Zv9_00000844	0	0	20.4004	4.48227	8.24669	7.05619	7.96651	6.97418	1.13018	0	0	0
XLOC_002231	chr2	32359053	32389783	XLOC_002231	Zv9_00004614 Zv9_00004613 Zv9_00004612 Zv9_00004615 Zv9_00004609 Zv9_00004616 Zv9_00004611 Zv9_00004610 Zv9_00004617	0	0	0	0	0	0	85.0737	32.5769	1.13025	0	0	0
XLOC_006411	chr5	32251531	32254936	XLOC_006411	Zv9_00012827	0	0	0.0122673	0.0216683	0.144404	13.927	108.839	44.3632	1.13039	0	0	0
XLOC_013194	chr11	46091798	46099714	XLOC_013194	Zv9_00026885 Zv9_00026884 Zv9_00026881 Zv9_00026880 Zv9_00026886 Zv9_00026883 Zv9_00026882	180.816	137.086	93.1848	114.167	2.91717	17.7884	37.8727	30.3467	1.13181	0	0	0
XLOC_011345	chr9	11007170	11030043	XLOC_011345	Zv9_00023018	3.18744	8.02582	1.64909	0.354113	0.0570904	0.0656173	0.0464402	0.0185568	1.13621	0	0	0
XLOC_008727	chr7	72166772	72184743	XLOC_008727	Zv9_00017775	27.4308	49.7695	14.5896	7.99998	7.48897	7.76141	7.94029	6.71537	1.13685	0	0	0
XLOC_028434	Zv9_NA885	41986	43861	XLOC_028434	Zv9_00058096 Zv9_00058097	4.98574	2.52015	3.81842	1.43813	0	0	0	0	1.13766	0	0	0
XLOC_021922	chr19	50143841	50153340	XLOC_021922	Zv9_00045085 Zv9_00045084	0	0	0.177128	0.602941	0.0701313	0.633693	6.84763	4.04532	1.13912	0	0	0
XLOC_025510	chr23	38910628	38921937	XLOC_025510	Zv9_00052313	5.08908	23.0527	15.488	8.71868	7.76657	4.60444	3.93602	2.55342	1.13948	0	0	0
XLOC_000677	chr1	7714180	7723107	XLOC_000677	Zv9_00001444 Zv9_00001443	4.89831	34.5807	19.7837	14.4138	9.63467	5.71065	5.49627	3.13339	1.14057	0	0	0
XLOC_025760	chr23	18785873	18858523	XLOC_025760	Zv9_00052848 Zv9_00052850 Zv9_00052853 Zv9_00052847 Zv9_00052851 Zv9_00052852 Zv9_00052849	22.9258	9.71386	19.9297	6.98586	1.33228	2.75906	4.66077	6.01898	1.14504	0	0	0
XLOC_012232	chr10	202176	208677	XLOC_012232	Zv9_00024878 Zv9_00024877	16.8357	10.1844	15.7747	0	38.1101	38.3793	43.7007	55.1302	1.14632	0	0	0
XLOC_016032	chr14	27271116	27277085	XLOC_016032	Zv9_00032909	35.3758	53.6631	7.73148	3.85934	8.66061	6.02599	4.84805	3.76908	1.14833	0	0	0
XLOC_002630	chr3	10535276	10548495	XLOC_002630	Zv9_00005407 Zv9_00005406	196.958	77.5162	197.295	151.507	102.262	45.34	29.3542	17.8336	1.15116	0	0	0
XLOC_026286	chr24	25436935	25454718	XLOC_026286	Zv9_00053999 Zv9_00054000 Zv9_00053998	0.294445	1.49254	2.60357	1.24236	0.349865	9.9494	8.2864	9.51927	1.1512	0	0	0
XLOC_012873	chr11	15975379	16124158	XLOC_012873	Zv9_00026269 Zv9_00026270 Zv9_00026267 Zv9_00026268	0	0	0.174135	0.723746	1.52431	3.94713	7.81213	0.751299	1.15161	0	0	0
XLOC_007176	chr6	29124866	29183296	XLOC_007176	Zv9_00014535 Zv9_00014536	1.52957	1.57913	1.52909	0.825604	0.313511	18.8997	9.83944	12.3909	1.15196	0	0	0
XLOC_021091	chr19	13066997	13246560	XLOC_021091	Zv9_00043335 Zv9_00043333 Zv9_00043334	0.310376	0.881304	0.10644	0.274639	1.34495	3.29343	17.7087	9.20106	1.15204	0	0	0
XLOC_021650	chr19	20177749	20178563	XLOC_021650	Zv9_00044515	0	0	3.97448	23.1432	6.7045	12.1396	9.25728	5.77896	1.15275	0	0	0
XLOC_016476	chr14	25400457	25487172	XLOC_016476	Zv9_00033768 Zv9_00033769	0.168466	0.781895	0.495237	0.286372	1.56675	50.7453	30.8195	42.4132	1.1534	0	0	0
XLOC_018146	chr16	43240945	43250931	XLOC_018146	Zv9_00037329 Zv9_00037330 Zv9_00037331 Zv9_00037328	2.97063	0.962216	89.753	220.462	0	39.5798	31.6329	8.58964	1.15656	0	0	0
XLOC_010598	chr8	51990347	52004373	XLOC_010598	Zv9_00021476 Zv9_00021477	0.938724	1.15343	1.78191	1.20731	1.25708	12.0519	8.33779	12.2256	1.1613	0	0	0
XLOC_025989	chr23	39902433	40068333	XLOC_025989	Zv9_00053381 Zv9_00053379 Zv9_00053387 Zv9_00053380 Zv9_00053382 Zv9_00053388 Zv9_00053386	0	8.83121	6.8898	2.27904	1.5801	0	0	0	1.16174	0	0	0
XLOC_020956	chr19	2256417	2274366	XLOC_020956	Zv9_00043066	0	0	0.0470217	0	0.217224	5.98732	3.8928	5.43113	1.16309	0	0	0
XLOC_002735	chr3	18757811	18974372	XLOC_002735	Zv9_00005623 Zv9_00005620 Zv9_00005622 Zv9_00005621	14.8101	21.7885	0	0.928319	0.0855205	0.010684	0	0	1.16332	0	0	0
XLOC_002389	chr2	48296568	48314796	XLOC_002389	Zv9_00004958 Zv9_00004957 Zv9_00004956	1.31838	0.844889	2.07675	1.52194	0.579907	21.446	15.5263	20.3526	1.16547	0	0	0
XLOC_001236	chr2	2392202	2425769	XLOC_001236	Zv9_00002657	0.0460483	0.0459611	0.795368	8.78858	2.43797	3.99279	2.76457	5.01011	1.16564	0	0	0
XLOC_024936	chr22	22503211	22528033	XLOC_024936	Zv9_00051083 Zv9_00051084	256.146	91.8905	162.751	83.429	3.85626	18.2985	21.6548	24.1623	1.16572	0	0	0
XLOC_008633	chr7	58372477	58393241	XLOC_008633	Zv9_00017591	0.0950711	0.0497967	0.0465421	0.142208	4.25867	9.08759	6.87324	15.1715	1.16665	0	0	0
XLOC_001489	chr2	25964819	25986192	XLOC_001489	Zv9_00003142	0.019506	0.014486	0.0110617	0.0185332	1.53218	13.2807	6.76959	9.56225	1.16767	0	0	0
XLOC_006758	chr5	69009295	69015545	XLOC_006758	Zv9_00013646	0.0140518	0.101626	0.328313	6.75982	12.2582	22.6455	26.4599	3.73745	1.16827	0	0	0
XLOC_021520	chr19	6312272	6329830	XLOC_021520	Zv9_00044201 Zv9_00044200	0.347826	0.192282	0.236615	0.235386	1.04835	17.7634	8.01428	10.7146	1.16907	0	0	0
XLOC_005863	chr5	58617349	58677262	XLOC_005863	Zv9_00011613 Zv9_00011609 Zv9_00011610 Zv9_00011616 Zv9_00011618 Zv9_00011617 Zv9_00011612 Zv9_00011607 Zv9_00011608 Zv9_00011611 Zv9_00011615 Zv9_00011614	3.84683	28.2411	17.1769	7.8548	5.21307	5.50232	5.04469	8.01965	1.17095	0	0	0
XLOC_010085	chr8	55665180	55667161	XLOC_010085	Zv9_00020397	0.125954	0.108085	0.398118	0.834815	1.33932	1.40155	5.91112	4.76644	1.1718	0	0	0
XLOC_001481	chr2	24788967	24878650	XLOC_001481	Zv9_00003124 Zv9_00003125	0	0	0	1.93056	4.31136	6.76848	7.71422	0	1.17203	0	0	0
XLOC_024368	chr22	10324975	10332788	XLOC_024368	Zv9_00049923 Zv9_00049922	0.23997	0.862665	1.78834	2.75769	4.75597	5.36587	6.24188	11.3754	1.1725	0	0	0
XLOC_025525	chr23	39991537	40238356	XLOC_025525	Zv9_00052340 Zv9_00052346 Zv9_00052342 Zv9_00052337 Zv9_00052338 Zv9_00052344 Zv9_00052345 Zv9_00052339 Zv9_00052341	0	40.4107	21.9158	4.36723	5.0605	0	0	0	1.17548	0	0	0
XLOC_012624	chr10	42654386	42667407	XLOC_012624	Zv9_00025725	20.7539	24.0474	9.37644	6.8997	7.63552	4.54747	3.82962	1.70712	1.17557	0	0	0
XLOC_011120	chr9	46673584	46737329	XLOC_011120	Zv9_00022598 Zv9_00022597 Zv9_00022599 Zv9_00022600 Zv9_00022602	8.96901	13.8054	5.82672	2.4422	3.32744	2.03077	1.95257	1.57872	1.17958	0	0	0
XLOC_024800	chr22	10535065	10550904	XLOC_024800	Zv9_00050797 Zv9_00050796	8.37643	42.8234	50.8031	20.207	21.6255	8.93108	6.1225	3.91828	1.18147	0	0	0
XLOC_025891	chr23	29638978	29748702	XLOC_025891	Zv9_00053132 Zv9_00053136 Zv9_00053139 Zv9_00053135 Zv9_00053140 Zv9_00053138 Zv9_00053133 Zv9_00053137 Zv9_00053134	0	0	0	2.66561	2.35611	9.8619	12.4912	0	1.18401	0	0	0
XLOC_017337	chr15	11829362	12135160	XLOC_017337	Zv9_00035623 Zv9_00035619 Zv9_00035614 Zv9_00035620 Zv9_00035618 Zv9_00035617 Zv9_00035615 Zv9_00035622 Zv9_00035621 Zv9_00035616	73.3813	37.9635	57.2973	37.6952	15.054	15.2651	14.4041	11.924	1.18641	0	0	0
XLOC_015591	chr13	33617988	33623915	XLOC_015591	Zv9_00031963 Zv9_00031961 Zv9_00031960 Zv9_00031962	0	0.0310726	0.0924265	0.197087	3.53145	12.6575	8.95477	13.7411	1.18693	0	0	0
XLOC_009143	chr7	35134642	35203553	XLOC_009143	Zv9_00018584 Zv9_00018583 Zv9_00018582	71.9246	36.2573	57.4728	27.2635	12.4956	12.8807	13.5572	18.1623	1.19098	0	0	0
XLOC_017959	chr16	27306054	27312784	XLOC_017959	Zv9_00036923 Zv9_00036924	23.3882	79.6592	72.4232	32.2245	26.6264	11.5683	10.847	8.215	1.19132	0	0	0
XLOC_009510	chr8	1948640	1963321	XLOC_009510	Zv9_00019325 Zv9_00019326	0	0	0	0	0.837917	0	6.08738	5.14872	1.19764	0	0	0
XLOC_000317	chr1	35664538	35678473	XLOC_000317	Zv9_00000693	62.174	31.7326	48.8667	29.7468	10.0376	14.228	10.8752	12.4638	1.1991	0	0	0
XLOC_025463	chr23	35477910	35514085	XLOC_025463	Zv9_00052208 Zv9_00052207	82.7585	50.794	84.5226	23.3557	12.6261	4.75494	6.23351	11.4373	1.20505	0	0	0
XLOC_021034	chr19	8380109	8421033	XLOC_021034	Zv9_00043240 Zv9_00043239 Zv9_00043237 Zv9_00043241 Zv9_00043242 Zv9_00043236 Zv9_00043243 Zv9_00043238	0	0	0	0	0	0	28.371	20.6998	1.20931	0	0	0
XLOC_022763	chr20	26507283	26561658	XLOC_022763	Zv9_00046746 Zv9_00046745 Zv9_00046747	0.0978462	0.0837227	0.113051	1.66556	25.0047	45.2107	63.9346	10.6104	1.21665	0	0	0
XLOC_014734	chr13	517824	536283	XLOC_014734	Zv9_00030202 Zv9_00030203 Zv9_00030198 Zv9_00030200 Zv9_00030199 Zv9_00030204 Zv9_00030201	0	0	0	0	0	0	21.444	17.6112	1.26837	0	0	0
XLOC_025789	chr23	20433656	20466165	XLOC_025789	Zv9_00052913 Zv9_00052912 Zv9_00052910 Zv9_00052911	0	0	0	0	0	9.29321	10.304	0	1.2938	0	0	0
XLOC_013097	chr11	39776644	39776883	XLOC_013097	Zv9_00026703	0	0	0.754662	5.67731	0	0.642182	0.647771	0	1.10164	0.01	1	0.664862
XLOC_015770	chr14	2582	8229	XLOC_015770	Zv9_00032366	439.493	35.4796	35.2555	81.8755	98.1417	65.951	51.1914	12.5423	1.10288	0.01	1	0.664862
XLOC_025156	chr23	4424338	4441348	XLOC_025156	Zv9_00051551	0.0134738	0.0107133	0.49368	0.232099	0.477707	0.346786	0.236708	4.44034	1.10603	0.01	1	0.664862
XLOC_003192	chr3	58050696	58077462	XLOC_003192	Zv9_00006545	0.0135701	0.00915765	0.0386711	0.389877	0.279144	0.26462	0.0801513	3.13982	1.1068	0.01	1	0.664862
XLOC_002519	chr2	59844616	59845600	XLOC_002519	Zv9_00005202	1.77586	1.66342	3.14196	4.29641	1.06893	0.0871315	0.047417	21.6526	1.1119	0.01	1	0.664862
XLOC_023054	chr20	53944762	53946858	XLOC_023054	Zv9_00047333	0	0	0.641949	1.56386	1.79786	1.80095	1.9024	8.32379	1.11467	0.01	1	0.664862
XLOC_011956	chr10	19584824	19622683	XLOC_011956	Zv9_00024305 Zv9_00024304	0.277068	0.518232	0.727042	1.64406	1.92796	6.93012	0	0	1.11708	0.01	1	0.664862
XLOC_002024	chr2	10655246	10669640	XLOC_002024	Zv9_00004182 Zv9_00004185 Zv9_00004183 Zv9_00004184	73.4852	23.9441	17.5572	21.9471	14.3455	11.3717	7.0008	2.06361	1.11751	0.01	1	0.664862
XLOC_014152	chr12	45877251	45923663	XLOC_014152	Zv9_00028983 Zv9_00028984 Zv9_00028985	6.53834	12.8726	5.37417	6.15807	34.7217	5.83646	3.37593	2.41849	1.11939	0.01	1	0.664862
XLOC_014819	chr13	7270234	7345448	XLOC_014819	Zv9_00030368 Zv9_00030370 Zv9_00030369	0.021271	0.0367255	0	0.0301726	2.98541	5.65673	4.12683	8.3147	1.12079	0.01	1	0.664862
XLOC_025182	chr23	6636885	6683043	XLOC_025182	Zv9_00051611 Zv9_00051612	61.0625	55.7147	58.4855	35.8809	139.115	11.6036	10.9593	11.7374	1.12197	0.01	1	0.664862
XLOC_021447	chr19	1017693	1054451	XLOC_021447	Zv9_00044058 Zv9_00044057 Zv9_00044061 Zv9_00044060 Zv9_00044059	263.349	99.9396	80.3383	77.5279	76.7208	43.529	36.1355	21.9411	1.1228	0.01	1	0.664862
XLOC_024962	chr22	25480411	25481218	XLOC_024962	Zv9_00051134 Zv9_00051133	2.36268	2.84683	0.322308	9.88825	1.79066	0.0419513	0	0	1.123	0.01	1	0.664862
XLOC_004498	chr4	47833473	47834892	XLOC_004498	Zv9_00008991	0	0	17.5122	219.443	28.7114	45.5638	59.3875	79.53	1.1243	0.01	1	0.664862
XLOC_011496	chr9	29904002	29972626	XLOC_011496	Zv9_00023360 Zv9_00023364 Zv9_00023365 Zv9_00023362 Zv9_00023363 Zv9_00023366 Zv9_00023358 Zv9_00023359 Zv9_00023361	0	0	0	86.2307	20.0227	19.6375	16.1613	11.5047	1.12611	0.01	1	0.664862
XLOC_023986	chr21	33844752	33892538	XLOC_023986	Zv9_00049210 Zv9_00049211	212.538	65.224	65.0548	48.6	68.9951	39.5886	25.7345	7.16324	1.12657	0.01	1	0.664862
XLOC_027576	chr25	14626217	14639520	XLOC_027576	Zv9_00056730 Zv9_00056729	5.96988	12.955	24.9176	0	92.3121	41.6657	34.5116	25.3164	1.12751	0.01	1	0.664862
XLOC_017817	chr16	12569403	12698822	XLOC_017817	Zv9_00036639 Zv9_00036638	0.00847653	0.0272539	0.355221	0.241718	0.139856	1.08655	5.9371	2.76019	1.12871	0.01	1	0.664862
XLOC_021231	chr19	30881780	30913824	XLOC_021231	Zv9_00043591 Zv9_00043590	229.915	70.804	66.2318	58.946	56.8405	22.2617	24.9849	15.5292	1.13055	0.01	1	0.664862
XLOC_023928	chr21	27029700	27735875	XLOC_023928	Zv9_00049079 Zv9_00049082 Zv9_00049081 Zv9_00049088 Zv9_00049078 Zv9_00049080 Zv9_00049083 Zv9_00049084 Zv9_00049085 Zv9_00049086 Zv9_00049087	1.90876	3.56949	0	0	0	0	0	0	1.13126	0.01	1	0.664862
XLOC_022990	chr20	48169573	48196297	XLOC_022990	Zv9_00047203 Zv9_00047207 Zv9_00047201 Zv9_00047202 Zv9_00047204 Zv9_00047206 Zv9_00047205	12.0421	22.005	0	4.53644	3.83834	5.42556	4.37862	3.31176	1.13408	0.01	1	0.664862
XLOC_006591	chr5	49887244	49958176	XLOC_006591	Zv9_00013287 Zv9_00013288	0.00601199	0.00434554	0.0106483	0	0.0270161	1.82323	10.3766	4.14704	1.13415	0.01	1	0.664862
XLOC_006942	chr6	6407536	6462035	XLOC_006942	Zv9_00014070	0.026206	0.0296757	0.0285967	0.0687282	0.118766	4.70888	25.8528	10.0832	1.13416	0.01	1	0.664862
XLOC_008908	chr7	15231033	15258724	XLOC_008908	Zv9_00018133 Zv9_00018134	0.0638018	0.0655746	0.0702813	0.474342	0.333457	16.6433	109.246	36.5536	1.13417	0.01	1	0.664862
XLOC_019095	chr17	20081634	20086841	XLOC_019095	Zv9_00039287	11.1867	4.11588	4.89922	42.9115	0	0	0	0	1.13434	0.01	1	0.664862
XLOC_018100	chr16	38174335	38318378	XLOC_018100	Zv9_00037223 Zv9_00037222	3.68581	3.22199	1.03415	10.0776	1.10322	0	0	0	1.13553	0.01	1	0.664862
XLOC_017060	chr15	32233671	32407677	XLOC_017060	Zv9_00035030 Zv9_00035032 Zv9_00035033	0.243478	0.195515	3.49724	10.3209	1.28777	5.03852	4.41804	6.71163	1.13815	0.01	1	0.664862
XLOC_012600	chr10	39393364	39516447	XLOC_012600	Zv9_00025668 Zv9_00025667	0	0	0.00218628	0.0824333	0.0666206	2.15133	9.29242	3.08453	1.13894	0.01	1	0.664862
XLOC_006551	chr5	43445416	43466085	XLOC_006551	Zv9_00013192 Zv9_00013193 Zv9_00013191 Zv9_00013194	0.264964	0.0746605	0.0999855	0.125664	0.210061	5.51163	47.3838	24.1263	1.1432	0.01	1	0.664862
XLOC_015398	chr13	12348419	12355405	XLOC_015398	Zv9_00031533 Zv9_00031534 Zv9_00031532	64.5975	5.33852	3.93625	14.551	30.3254	35.7907	33.9532	45.5668	1.14474	0.01	1	0.664862
XLOC_023584	chr21	43235614	43237743	XLOC_023584	Zv9_00048372	0	0	0.101377	0.480112	4.08256	3.62265	4.97403	6.65125	1.14491	0.01	1	0.664862
XLOC_025847	chr23	26417468	26455672	XLOC_025847	Zv9_00053026	3.16176	5.86437	0.71491	0.166708	0.156078	0.0806161	0.0455706	0.156553	1.14614	0.01	1	0.664862
XLOC_005000	chr4	24560107	24572993	XLOC_005000	Zv9_00009985 Zv9_00009984	0.13798	0.109055	1.5228	16.4421	2.50473	3.68634	4.65635	7.57927	1.14926	0.01	1	0.664862
XLOC_019530	chr17	6121900	6146508	XLOC_019530	Zv9_00040173 Zv9_00040174 Zv9_00040172	1.82603	8.16703	14.4836	7.35448	1.2623	117.999	63.9094	86.7633	1.15044	0.01	1	0.664862
XLOC_012186	chr10	44597892	44662795	XLOC_012186	Zv9_00024805 Zv9_00024806	52.4319	28.3819	37.8813	24.9018	2.79023	13.5788	11.0933	11.4495	1.15267	0.01	1	0.664862
XLOC_022934	chr20	42457372	42471618	XLOC_022934	Zv9_00047090	0.00611281	0	0.00784785	0	0.0144541	3.26029	1.84207	2.48933	1.15293	0.01	1	0.664862
XLOC_006085	chr5	1331608	1353777	XLOC_006085	Zv9_00012121 Zv9_00012120	9.66811	6.9845	10.4393	3.29285	1.39257	1.7866	1.75982	1.10546	1.15294	0.01	1	0.664862
XLOC_009864	chr8	30960612	31006815	XLOC_009864	Zv9_00020010 Zv9_00020009 Zv9_00020008	9.35638	14.6626	5.21577	2.92344	3.53048	4.34989	2.7672	1.23441	1.15307	0.01	1	0.664862
XLOC_012401	chr10	17730234	17741789	XLOC_012401	Zv9_00025245	8.55373	28.5362	4.15087	2.21611	5.55588	13.301	13.5843	16.314	1.15384	0.01	1	0.664862
XLOC_027684	chr25	24960205	24971419	XLOC_027684	Zv9_00056931 Zv9_00056932 Zv9_00056930	22.1545	53.2127	23.9117	8.88022	8.57287	8.80489	7.44967	6.48843	1.15418	0.01	1	0.664862
XLOC_010718	chr9	1993295	1997906	XLOC_010718	Zv9_00021719	0.0718575	0.0488507	0.0227821	0	0.019986	1.6392	6.45332	2.77943	1.15418	0.01	1	0.664862
XLOC_005504	chr5	24752575	24756760	XLOC_005504	Zv9_00010832	16.6753	54.7958	138.41	320.96	579.321	0	362.573	235.758	1.15582	0.01	1	0.664862
XLOC_025734	chr23	16655892	16656566	XLOC_025734	Zv9_00052769	0	20.3856	9.06393	1.94213	0	0	0	0	1.15717	0.01	1	0.664862
XLOC_006086	chr5	1354162	1382226	XLOC_006086	Zv9_00012123 Zv9_00012122	5.793	4.60199	6.67969	1.34296	0.746117	0.991989	0.964489	0.610139	1.16103	0.01	1	0.664862
XLOC_014715	chr13	52335	55740	XLOC_014715	Zv9_00030166	1.14115	1.60694	2.77589	4.69166	18.6167	6.08449	9.28203	7.4284	1.16293	0.01	1	0.664862
XLOC_024834	chr22	12328209	12381384	XLOC_024834	Zv9_00050852	22.767	13.5884	18.0104	11.3615	2.80039	4.00692	2.90814	1.02347	1.16452	0.01	1	0.664862
XLOC_009719	chr8	21818298	21891479	XLOC_009719	Zv9_00019723 Zv9_00019724	15.2201	18.6413	0	2.98337	4.83853	3.63724	3.76677	4.04357	1.16546	0.01	1	0.664862
XLOC_010841	chr9	17954972	17966596	XLOC_010841	Zv9_00021981	0.250268	0.34952	2.74442	44.0983	18.7943	29.0925	26.6227	38.651	1.16582	0.01	1	0.664862
XLOC_025244	chr23	13927005	13935867	XLOC_025244	Zv9_00051719	0.043081	0.325685	0.182437	0.0350594	0.132403	9.60406	5.22811	5.98654	1.16902	0.01	1	0.664862
XLOC_014048	chr12	33302781	33318208	XLOC_014048	Zv9_00028789	0	0	0.753508	14.6765	66.8069	25.2792	36.9331	44.2388	1.16961	0.01	1	0.664862
XLOC_018447	chr16	15829388	15839582	XLOC_018447	Zv9_00037907	0	0	0	0	0.547003	9.89527	4.04398	5.85158	1.16999	0.01	1	0.664862
XLOC_016276	chr14	53385044	53456946	XLOC_016276	Zv9_00033377 Zv9_00033376 Zv9_00033374 Zv9_00033375 Zv9_00033372 Zv9_00033371 Zv9_00033373	0	0	0	0	0	3.18608	7.72197	0	1.17085	0.01	1	0.664862
XLOC_021306	chr19	41029848	41074509	XLOC_021306	Zv9_00043747 Zv9_00043748	38.8406	47.5356	65.0354	23.6313	26.49	10.6759	7.964	6.28027	1.17087	0.01	1	0.664862
XLOC_003132	chr3	52304824	52516495	XLOC_003132	Zv9_00006432 Zv9_00006434 Zv9_00006435 Zv9_00006431 Zv9_00006433	34.2212	22.8637	38.5523	11.4417	1.44432	7.94348	7.4664	9.80914	1.17102	0.01	1	0.664862
XLOC_006688	chr5	62964622	62966167	XLOC_006688	Zv9_00013516 Zv9_00013517	0.0141263	0.118898	0.0427398	0.200566	1.00809	0.585973	4.42278	3.44695	1.17597	0.01	1	0.664862
XLOC_000936	chr1	40504060	40525372	XLOC_000936	Zv9_00002054 Zv9_00002053 Zv9_00002050 Zv9_00002051 Zv9_00002057 Zv9_00002052 Zv9_00002055 Zv9_00002056	0	0	5.08722	10.5028	15.3715	0	9.22297	5.5772	1.17679	0.01	1	0.664862
XLOC_001821	chr2	55857445	55885422	XLOC_001821	Zv9_00003805	20.999	14.2751	19.7714	7.97393	3.77165	2.29786	1.37609	1.44551	1.18182	0.01	1	0.664862
XLOC_008816	chr7	2654884	2663550	XLOC_008816	Zv9_00017944 Zv9_00017943	0	0	0	0	241.369	411.934	254.981	500.533	1.18198	0.01	1	0.664862
XLOC_015543	chr13	30802864	30869618	XLOC_015543	Zv9_00031858	0	0.00334069	0.0070608	0.00867064	5.39369	6.51052	5.72412	10.8594	1.18226	0.01	1	0.664862
XLOC_004250	chr4	19822825	19926284	XLOC_004250	Zv9_00008679 Zv9_00008678	0.217152	1.30657	0.71907	0.423847	0.457785	8.20163	6.04641	7.43149	1.18268	0.01	1	0.664862
XLOC_018173	chr16	45917415	45975970	XLOC_018173	Zv9_00037389 Zv9_00037390	11.2934	14.9774	23.8141	5.45099	11.1287	1.614	1.23153	0.725651	1.18449	0.01	1	0.664862
XLOC_024642	chr22	42052911	42079738	XLOC_024642	Zv9_00050466	10.9846	36.2956	48.8567	24.4101	23.9075	10.0714	9.64567	5.34872	1.18455	0.01	1	0.664862
XLOC_015449	chr13	20685835	20686020	XLOC_015449	Zv9_00031661	158.135	124.377	179.927	78.7453	48.1876	28.6889	13.1524	0	1.18526	0.01	1	0.664862
XLOC_020957	chr19	2283775	2398499	XLOC_020957	Zv9_00043067	0	0.0106886	0.0475938	0.0177533	0.195671	4.34476	2.91226	3.27808	1.18709	0.01	1	0.664862
XLOC_012208	chr10	46328511	46342937	XLOC_012208	Zv9_00024847	2.54661	10.0099	9.26383	4.96712	3.42878	0.884849	0.699804	0.667747	1.18725	0.01	1	0.664862
XLOC_007739	chr6	30876266	30955212	XLOC_007739	Zv9_00015736 Zv9_00015734 Zv9_00015735	0.0457444	0.10847	0.134197	0.15413	1.51929	5.30658	3.83797	5.80176	1.18859	0.01	1	0.664862
XLOC_024641	chr22	42044626	42049890	XLOC_024641	Zv9_00050465	6.38607	20.7346	25.9168	10.8977	11.3844	4.55125	3.52341	2.62642	1.18901	0.01	1	0.664862
XLOC_000138	chr1	13005036	13044995	XLOC_000138	Zv9_00000293 Zv9_00000296 Zv9_00000297 Zv9_00000292 Zv9_00000294	0.134329	0.112512	0.203648	0.45057	0.775527	13.0882	5.53933	9.80384	1.19214	0.01	1	0.664862
XLOC_020863	chr18	47053469	47093820	XLOC_020863	Zv9_00042872 Zv9_00042869 Zv9_00042875 Zv9_00042870 Zv9_00042873 Zv9_00042876 Zv9_00042874 Zv9_00042871	0	0	0	0	0.164216	12.822	9.37751	10.8335	1.1928	0.01	1	0.664862
XLOC_004254	chr4	20653452	20658579	XLOC_004254	Zv9_00008689	0.11274	0.0840696	0.0303736	0	0.0599627	4.39458	2.72124	4.5764	1.19353	0.01	1	0.664862
XLOC_027880	Zv9_NA235	39	16824	XLOC_027880	Zv9_00057312 Zv9_00057316 Zv9_00057317 Zv9_00057311 Zv9_00057320 Zv9_00057319 Zv9_00057313 Zv9_00057314 Zv9_00057310 Zv9_00057315	166.297	84.6297	89.7095	62.037	33.7262	12.0619	11.8164	7.65471	1.19356	0.01	1	0.664862
XLOC_016139	chr14	36587923	36662053	XLOC_016139	Zv9_00033111 Zv9_00033109	18.2118	33.238	10.9803	2.3262	1.88941	2.97394	1.56648	3.09395	1.19401	0.01	1	0.664862
XLOC_019973	chr17	53413516	53415928	XLOC_019973	Zv9_00041109	3.04568	0.832338	4.81008	1.52131	0	0	0	0	1.19744	0.01	1	0.664862
XLOC_009790	chr8	25597967	25632932	XLOC_009790	Zv9_00019875	0.111839	0.131885	0.14551	0.235118	0.665583	7.4783	5.49386	7.75274	1.19921	0.01	1	0.664862
XLOC_021387	chr19	47937595	47944931	XLOC_021387	Zv9_00043938 Zv9_00043935 Zv9_00043933 Zv9_00043934 Zv9_00043936 Zv9_00043937	0	0	0.316973	0.451756	2.1552	3.9395	5.79089	1.82195	1.20016	0.01	1	0.664862
XLOC_010703	chr9	1203856	1206901	XLOC_010703	Zv9_00021695	0	0	0.0241083	0.0641943	0.194904	1.00425	5.02027	3.16478	1.20297	0.01	1	0.664862
XLOC_028384	Zv9_NA713	10375	10847	XLOC_028384	Zv9_00058042	18.7828	11.0188	19.5262	5.58532	2.34799	3.61083	2.52635	4.70296	1.20414	0.01	1	0.664862
XLOC_011356	chr9	12681353	12701026	XLOC_011356	Zv9_00023043 Zv9_00023042	0.080383	0.226266	1.28894	1.22026	4.48766	2.5888	10.2888	10.3061	1.20419	0.01	1	0.664862
XLOC_018241	chr16	54736570	54740193	XLOC_018241	Zv9_00037517	14.9154	11.5514	131.975	362.336	586.625	1761.33	2131.68	536.43	1.21472	0.01	1	0.664862
XLOC_013999	chr12	28697524	28699778	XLOC_013999	Zv9_00028677	0	0	0	0	2.51145	7.52064	12.5929	3.77694	1.21949	0.01	1	0.664862
XLOC_000130	chr1	11492026	11556721	XLOC_000130	Zv9_00000276 Zv9_00000274 Zv9_00000275 Zv9_00000272 Zv9_00000273	54.8725	45.3979	0	13.4425	5.7516	5.21945	2.30329	4.10434	1.22236	0.01	1	0.664862
XLOC_015963	chr14	19479994	19497778	XLOC_015963	Zv9_00032745 Zv9_00032744 Zv9_00032746	49.2251	17.7836	48.445	14.0153	0.7649	0	0	4.71939	1.22303	0.01	1	0.664862
XLOC_008433	chr7	36003608	36073102	XLOC_008433	Zv9_00017163 Zv9_00017162 Zv9_00017161	29.4249	27.6801	23.6821	5.63266	10.3731	2.29878	2.07837	2.58211	1.22611	0.01	1	0.664862
XLOC_018737	chr16	44264877	44273511	XLOC_018737	Zv9_00038553 Zv9_00038552	0.500099	0.041487	8.19502	20.6748	4.03837	10.4248	10.3663	19.101	1.22837	0.01	1	0.664862
XLOC_026147	chr24	8536008	8542037	XLOC_026147	Zv9_00053696 Zv9_00053698 Zv9_00053697	0.611256	1.90524	3.19352	4.66437	1.66263	16.6896	12.4886	17.5447	1.23452	0.01	1	0.664862
XLOC_020441	chr18	47233997	47243034	XLOC_020441	Zv9_00042048	0	0	0	0	2.1541	9.87414	11.0654	0	1.26319	0.01	1	0.664862
XLOC_015932	chr14	14032915	14041252	XLOC_015932	Zv9_00032679 Zv9_00032680	0.175685	0	0.363043	0.601724	0.917428	0.186116	0.183558	9.46443	1.10657	0.02	1	0.865755
XLOC_023154	chr21	3195590	3195942	XLOC_023154	Zv9_00047547	0	0	0	2.65119	0	0	0.171142	0	1.10676	0.02	1	0.865755
XLOC_010166	chr8	4942375	4969920	XLOC_010166	Zv9_00020556 Zv9_00020555 Zv9_00020557	384.273	14.1541	9.86577	18.5687	30.5731	22.348	16.6148	5.89573	1.10835	0.02	1	0.865755
XLOC_028201	Zv9_scaffold3539	166077	181600	XLOC_028201	Zv9_00057796 Zv9_00057797	0.0439402	0	1.24793	35.92	0.900796	5.05431	2.81534	1.97745	1.10906	0.02	1	0.865755
XLOC_028873	Zv9_scaffold3474	43348	56556	XLOC_028873	Zv9_00058654	0.0564527	0.326953	0.522012	0.726524	0.506255	0.260713	0.555639	6.75508	1.11117	0.02	1	0.865755
XLOC_015610	chr13	36282169	36293849	XLOC_015610	Zv9_00032007 Zv9_00032008	571.307	22.1895	22.7762	33.1692	79.1315	80.5919	62.6266	12.3951	1.11205	0.02	1	0.865755
XLOC_012984	chr11	26669693	26684375	XLOC_012984	Zv9_00026502	0.0738864	0.0787284	0.207199	0.530992	0.586366	0.193566	0.200275	18.3729	1.11209	0.02	1	0.865755
XLOC_005470	chr5	21440563	21538139	XLOC_005470	Zv9_00010775 Zv9_00010776	0.696386	6.03672	0.744853	5.94808	35.8054	6.45237	8.06514	6.83472	1.11355	0.02	1	0.865755
XLOC_008145	chr7	16098429	16101171	XLOC_008145	Zv9_00016550	0	0	0.00104731	32.0542	0	0.402055	0.0767126	0	1.11426	0.02	1	0.865755
XLOC_014095	chr12	36888129	36895480	XLOC_014095	Zv9_00028882	99.1807	8.55831	7.17947	24.1517	22.8195	17.7288	15.297	3.87331	1.11444	0.02	1	0.865755
XLOC_024089	chr21	43243213	43308920	XLOC_024089	Zv9_00049420 Zv9_00049418 Zv9_00049417 Zv9_00049419	197.061	51.2006	48.157	64.437	63.4529	40.1317	31.0415	10.6822	1.11606	0.02	1	0.865755
XLOC_023952	chr21	29464598	29478349	XLOC_023952	Zv9_00049133	0.00800135	0.0269035	0.418619	0.569577	8.37727	0.553117	0.859775	1.92385	1.11613	0.02	1	0.865755
XLOC_015970	chr14	20081090	20140618	XLOC_015970	Zv9_00032758 Zv9_00032759	17.3194	32.4766	25.6157	19.552	85.4326	34.4368	20.8959	24.0135	1.12094	0.02	1	0.865755
XLOC_000184	chr1	18276889	18303789	XLOC_000184	Zv9_00000395 Zv9_00000393 Zv9_00000394 Zv9_00000392	284.572	97.2167	112.715	95.0753	100.108	62.9522	50.4791	15.959	1.12128	0.02	1	0.865755
XLOC_025883	chr23	28692569	28696599	XLOC_025883	Zv9_00053112	0	0	1.38261	5.67244	0.455151	1.42694	1.0526	1.14549	1.12237	0.02	1	0.865755
XLOC_018816	chr16	49986191	49998826	XLOC_018816	Zv9_00038725	0.0263181	0.0486884	0.0121559	0.930319	8.93117	1.10523	1.86984	1.91046	1.12512	0.02	1	0.865755
XLOC_027531	chr25	8294705	8318624	XLOC_027531	Zv9_00056640 Zv9_00056639 Zv9_00056641	1.01762	0.580283	5.41536	9.33063	12.1333	16.2692	13.4851	55.9052	1.12548	0.02	1	0.865755
XLOC_017195	chr15	46739097	46739518	XLOC_017195	Zv9_00035310	7.34602	5.63735	6.63499	9.06237	1.93296	3.36662	1.49446	28.317	1.12866	0.02	1	0.865755
XLOC_005874	chr5	59074992	59089282	XLOC_005874	Zv9_00011640 Zv9_00011639	4.70694	11.216	3.10742	1.49927	1.85826	2.39866	2.10844	2.1575	1.12906	0.02	1	0.865755
XLOC_017340	chr15	12365831	12372222	XLOC_017340	Zv9_00035634 Zv9_00035633	0.00284999	0.00686829	0	0	0	0.12549	5.61024	2.16344	1.12915	0.02	1	0.865755
XLOC_002521	chr2	59934845	59957382	XLOC_002521	Zv9_00005204 Zv9_00005205	0	0	0	0	0.21897	12.3547	153.931	70.5089	1.12955	0.02	1	0.865755
XLOC_004400	chr4	35991264	35993383	XLOC_004400	Zv9_00008886	0.239867	0.22629	6.41118	1.74117	1.20439	0.273359	0.209961	0.108671	1.13109	0.02	1	0.865755
XLOC_000688	chr1	8310211	8326171	XLOC_000688	Zv9_00001460 Zv9_00001463 Zv9_00001461 Zv9_00001462	3.62755	2.44895	2.2613	1.48826	1.31235	0.195671	0.269844	10.3036	1.1338	0.02	1	0.865755
XLOC_018030	chr16	31440637	31455290	XLOC_018030	Zv9_00037065	0.042959	0	0.519585	0.133792	0.108798	5.16332	53.0429	17.3901	1.13483	0.02	1	0.865755
XLOC_022735	chr20	23859397	23928407	XLOC_022735	Zv9_00046686 Zv9_00046687	3.03302	6.23828	11.0071	5.63432	25.4339	7.34548	5.11336	4.60662	1.13564	0.02	1	0.865755
XLOC_022755	chr20	25984540	26031043	XLOC_022755	Zv9_00046732	0	0.0122533	0.0148028	0	0.0728499	2.90907	25.0044	7.47063	1.13896	0.02	1	0.865755
XLOC_024823	chr22	11609739	11630786	XLOC_024823	Zv9_00050830 Zv9_00050829	7.32149	14.0737	2.87238	1.52676	2.88217	3.75094	4.14214	3.85198	1.14402	0.02	1	0.865755
XLOC_014328	chr12	5650700	5668125	XLOC_014328	Zv9_00029333	0.0120709	0.0135031	0.0824903	0.10236	0.104002	1.55305	6.46881	2.88493	1.14435	0.02	1	0.865755
XLOC_027193	chr25	20160320	20167451	XLOC_027193	Zv9_00055936	5.90792	10.6429	0.934481	0.498027	0.956865	1.31541	1.10542	1.57938	1.14531	0.02	1	0.865755
XLOC_001014	chr1	47602601	47611412	XLOC_001014	Zv9_00002206 Zv9_00002208	31.7365	64.0906	20.6138	6.97649	8.61705	6.00632	4.30815	5.17058	1.14637	0.02	1	0.865755
XLOC_016621	chr14	40498564	40571255	XLOC_016621	Zv9_00034144	0.00995124	0	0.0507771	0.0484307	0.315827	7.08242	25.8249	6.31476	1.14653	0.02	1	0.865755
XLOC_023755	chr21	11248976	11257011	XLOC_023755	Zv9_00048718	4.90036	7.72863	11.7854	14.8264	51.6098	19.5719	14.9921	24.3468	1.14881	0.02	1	0.865755
XLOC_002246	chr2	35230059	35287893	XLOC_002246	Zv9_00004645 Zv9_00004640 Zv9_00004639 Zv9_00004642 Zv9_00004644 Zv9_00004641 Zv9_00004643	0	0	0	0	1.02963	102.295	337.079	125.699	1.1537	0.02	1	0.865755
XLOC_014559	chr12	31921367	31935295	XLOC_014559	Zv9_00029829 Zv9_00029827 Zv9_00029826	9.92909	36.2451	12.692	3.54256	0.88383	0.336323	0.169887	0.730286	1.15429	0.02	1	0.865755
XLOC_019822	chr17	33893488	33913234	XLOC_019822	Zv9_00040797 Zv9_00040799 Zv9_00040800 Zv9_00040798	3.41732	16.6417	9.62215	4.27763	3.23439	1.89315	1.38867	1.13819	1.15687	0.02	1	0.865755
XLOC_015307	chr13	2128511	2129324	XLOC_015307	Zv9_00031361	0	0	0	0	0.105426	8.91528	4.42002	5.99741	1.15802	0.02	1	0.865755
XLOC_016372	chr14	8353744	8354046	XLOC_016372	Zv9_00033554	0	0	0	0	174.539	221.936	224.215	377.713	1.15873	0.02	1	0.865755
XLOC_006913	chr6	2600288	3081450	XLOC_006913	Zv9_00013996 Zv9_00014000 Zv9_00013997 Zv9_00013999 Zv9_00014001 Zv9_00013998	0.624079	1.23214	2.41563	0.954984	0.348424	7.35958	6.35014	8.06221	1.15932	0.02	1	0.865755
XLOC_018082	chr16	36238524	36240834	XLOC_018082	Zv9_00037176	6.33346	27.059	48.9974	18.6054	22.0819	10.222	8.48125	4.92537	1.15936	0.02	1	0.865755
XLOC_025105	chr23	569570	583852	XLOC_025105	Zv9_00051434 Zv9_00051433	71.3238	185.831	68.412	22.5491	0.865332	0.438412	0.180162	0.118734	1.15956	0.02	1	0.865755
XLOC_006920	chr6	3492434	3503855	XLOC_006920	Zv9_00014014	0	0.00175648	0.0163787	0.00493732	1.04308	89.6838	44.0244	58.1062	1.16004	0.02	1	0.865755
XLOC_017633	chr15	42825969	42827605	XLOC_017633	Zv9_00036243	0.612903	3.73745	1.58111	0.620794	0.0649663	0.00546375	0.00760873	0	1.16017	0.02	1	0.865755
XLOC_026874	chr24	40235963	40237571	XLOC_026874	Zv9_00055215	0	0	0.480845	3.2196	0.559982	3.83263	6.25429	9.35832	1.16058	0.02	1	0.865755
XLOC_001298	chr2	7264594	7299797	XLOC_001298	Zv9_00002771	2.56823	15.3913	6.83187	1.90712	0.774477	1.07865	1.22277	0.702732	1.16102	0.02	1	0.865755
XLOC_027377	chr25	36771448	36853540	XLOC_027377	Zv9_00056308 Zv9_00056306 Zv9_00056305 Zv9_00056307	0.0566484	0.0683992	0.0488823	0.0171326	0.239372	4.27701	2.68954	3.67997	1.16116	0.02	1	0.865755
XLOC_025829	chr23	24772434	24781167	XLOC_025829	Zv9_00052989 Zv9_00052988	0.0249779	0.0096999	0.0113131	0.0475762	1.40258	4.09044	2.88745	4.97034	1.16252	0.02	1	0.865755
XLOC_020270	chr18	26664041	26697592	XLOC_020270	Zv9_00041701	0	0	0.01019	0.0254778	0.0893697	4.57928	2.41816	2.97784	1.16323	0.02	1	0.865755
XLOC_011004	chr9	34011539	34015377	XLOC_011004	Zv9_00022332	0.123494	0.121429	0.0867981	0.0876229	0.272889	14.8595	39.6012	10.7343	1.16354	0.02	1	0.865755
XLOC_024399	chr22	12387483	12414330	XLOC_024399	Zv9_00049984 Zv9_00049985	25.2879	14.7653	20.724	12.6018	3.02476	3.67699	2.30529	1.16573	1.16622	0.02	1	0.865755
XLOC_006535	chr5	42129846	42136273	XLOC_006535	Zv9_00013146 Zv9_00013147 Zv9_00013145	0.00827867	0.0274934	0.0197822	0.247298	32.702	11.8393	9.31598	13.1818	1.16675	0.02	1	0.865755
XLOC_028251	Zv9_scaffold3564	130118	136955	XLOC_028251	Zv9_00057883	2.84506	4.96739	1.1043	0.271875	0.122248	0.198637	0.240649	0.0778712	1.17529	0.02	1	0.865755
XLOC_012648	chr10	45064865	45175669	XLOC_012648	Zv9_00025793 Zv9_00025794 Zv9_00025796 Zv9_00025795 Zv9_00025792 Zv9_00025797	0.49195	1.40132	1.39823	1.20055	0.555446	27.6787	17.6343	18.266	1.17533	0.02	1	0.865755
XLOC_026924	chr25	18142	28256	XLOC_026924	Zv9_00055358 Zv9_00055359 Zv9_00055357	14.4647	8.23269	14.0864	17.7615	0	43.5966	41.9303	40.5991	1.17571	0.02	1	0.865755
XLOC_008096	chr7	10106698	10292034	XLOC_008096	Zv9_00016453	39.3359	37.8046	21.56	3.11802	18.1743	7.88751	6.27583	4.81124	1.17599	0.02	1	0.865755
XLOC_010706	chr9	1259338	1260963	XLOC_010706	Zv9_00021701	2.44103	0.635218	0.334704	0	3.09923	5.02351	2.95521	8.03986	1.17652	0.02	1	0.865755
XLOC_013930	chr12	21245574	21441414	XLOC_013930	Zv9_00028480 Zv9_00028478 Zv9_00028487 Zv9_00028479 Zv9_00028486	0.0183513	0.089717	0.146162	2.28427	8.2705	2.16106	3.12193	4.47594	1.17691	0.02	1	0.865755
XLOC_018252	chr16	55574347	56030084	XLOC_018252	Zv9_00037539 Zv9_00037540	0	0	0	0	0.679226	43.6735	105.981	32.4692	1.17724	0.02	1	0.865755
XLOC_021864	chr19	45151184	45224720	XLOC_021864	Zv9_00044958 Zv9_00044959	0.00768328	0.0610075	0	0.788392	0.971137	10.2068	6.92229	8.01468	1.17732	0.02	1	0.865755
XLOC_021921	chr19	50139149	50142757	XLOC_021921	Zv9_00045083	0.0428685	0	0.108923	0.42443	0.0506731	0.888726	9.75007	6.38297	1.17806	0.02	1	0.865755
XLOC_022889	chr20	37774957	37785319	XLOC_022889	Zv9_00047006 Zv9_00047004 Zv9_00047007 Zv9_00047005	41.1065	37.1342	29.9092	32.2036	0	12.154	10.4531	0	1.17866	0.02	1	0.865755
XLOC_019985	chr17	53908605	53916172	XLOC_019985	Zv9_00041133 Zv9_00041134	0	0	0	0	0	13.1406	9.30573	10.9425	1.18013	0.02	1	0.865755
XLOC_025225	chr23	11391912	11558484	XLOC_025225	Zv9_00051684 Zv9_00051686 Zv9_00051685	0.0284374	0.0265751	0.21219	0.165476	0.327562	4.40068	2.35642	2.67058	1.18045	0.02	1	0.865755
XLOC_006419	chr5	33243680	33411312	XLOC_006419	Zv9_00012841 Zv9_00012854 Zv9_00012853 Zv9_00012840 Zv9_00012857	0	0	0	0	0	5.91615	2.20436	3.85861	1.18249	0.02	1	0.865755
XLOC_002666	chr3	14176506	14211912	XLOC_002666	Zv9_00005475	7.13632	27.4253	16.4879	6.82703	2.59221	1.99725	1.44565	2.54682	1.18263	0.02	1	0.865755
XLOC_020586	chr18	8336821	8353860	XLOC_020586	Zv9_00042316	0	0	0.168565	0.635575	4.86522	3.13899	7.26641	9.28772	1.18283	0.02	1	0.865755
XLOC_017084	chr15	35455274	35491682	XLOC_017084	Zv9_00035080 Zv9_00035082 Zv9_00035079	0.0908052	0.862004	0.0494865	0.545892	2.28794	4.1215	9.46923	3.9531	1.18473	0.02	1	0.865755
XLOC_003658	chr3	31744141	31756442	XLOC_003658	Zv9_00007491 Zv9_00007492	3.99488	6.57857	0.977402	0.121722	0.0138511	0.0695971	0.028829	0.0364388	1.18631	0.02	1	0.865755
XLOC_011623	chr9	42817908	42857665	XLOC_011623	Zv9_00023634 Zv9_00023632 Zv9_00023633	0	0.00131317	0.501884	0.700664	0	7.70148	4.2709	4.07928	1.18723	0.02	1	0.865755
XLOC_013446	chr11	23429782	23432768	XLOC_013446	Zv9_00027457	0	0	0	0	0.43496	40.4036	12.2587	22.7879	1.19012	0.02	1	0.865755
XLOC_009836	chr8	28660877	28671265	XLOC_009836	Zv9_00019960	5.01982	16.2732	32.5979	48.659	63.1655	99.5788	140.686	118.454	1.19166	0.02	1	0.865755
XLOC_014068	chr12	34928416	34929979	XLOC_014068	Zv9_00028822	53.1996	29.6308	33.5917	18.1953	20.4982	2.78185	1.32476	33.6581	1.19276	0.02	1	0.865755
XLOC_009634	chr8	14674965	14687706	XLOC_009634	Zv9_00019568	0	0.0396246	0.0813976	0.227444	2.9492	11.637	7.89255	14.9687	1.19301	0.02	1	0.865755
XLOC_001472	chr2	24400204	24439947	XLOC_001472	Zv9_00003106 Zv9_00003105 Zv9_00003107	52.754	45.5501	66.1736	19.1774	14.4867	7.53637	5.5437	5.94649	1.19331	0.02	1	0.865755
XLOC_000518	chr1	54579471	54592934	XLOC_000518	Zv9_00001111	0	0	0.0738458	1.30916	15.5442	29.5368	42.6161	5.40761	1.19557	0.02	1	0.865755
XLOC_026314	chr24	27165375	27226287	XLOC_026314	Zv9_00054061 Zv9_00054059 Zv9_00054060 Zv9_00054055 Zv9_00054058 Zv9_00054056 Zv9_00054057 Zv9_00054062 Zv9_00054063	15.2053	28.3838	10.1661	7.52433	3.14429	0	0	0	1.19601	0.02	1	0.865755
XLOC_027361	chr25	36080975	36101896	XLOC_027361	Zv9_00056273	0.0345986	0.0210795	0.219736	0.505796	0.286452	4.65929	2.30306	3.32826	1.20048	0.02	1	0.865755
XLOC_022029	chr20	7029367	7033442	XLOC_022029	Zv9_00045296	0.171381	0.0195982	0.759734	22.5094	1.93838	6.5474	10.2391	15.6301	1.20154	0.02	1	0.865755
XLOC_020930	chr19	690620	747788	XLOC_020930	Zv9_00043005 Zv9_00043006	0.0707142	0.117732	0.263493	0.182099	0.433422	4.90499	3.84215	4.8745	1.20174	0.02	1	0.865755
XLOC_004921	chr4	16321363	16347160	XLOC_004921	Zv9_00009801 Zv9_00009803 Zv9_00009804 Zv9_00009802	119.477	67.4837	101.086	19.9751	0.171458	1.15554	0.979666	4.30722	1.20227	0.02	1	0.865755
XLOC_017636	chr15	43063820	43065133	XLOC_017636	Zv9_00036255	1.48019	5.92643	3.62731	1.69584	0.0619351	0.094007	0.00396659	0	1.20418	0.02	1	0.865755
XLOC_000799	chr1	20392853	20549039	XLOC_000799	Zv9_00001737 Zv9_00001739 Zv9_00001736 Zv9_00001734 Zv9_00001738 Zv9_00001735	14.2262	33.6032	28.9897	13.326	13.4596	6.02977	4.18501	3.62349	1.20757	0.02	1	0.865755
XLOC_010534	chr8	42650575	42658403	XLOC_010534	Zv9_00021352	0	0.0234453	0.0226847	0	0.751285	78.0991	55.9963	56.9198	1.20783	0.02	1	0.865755
XLOC_008309	chr7	27038852	27044612	XLOC_008309	Zv9_00016904 Zv9_00016906 Zv9_00016905	4.77406	6.86458	85.9761	199.529	314.112	593.74	760.149	429.667	1.20958	0.02	1	0.865755
XLOC_024846	chr22	13185428	13335092	XLOC_024846	Zv9_00050874 Zv9_00050876 Zv9_00050875	1.27455	4.77403	3.99858	1.68699	1.8544	0	0	0	1.21096	0.02	1	0.865755
XLOC_023980	chr21	32393204	32433317	XLOC_023980	Zv9_00049195 Zv9_00049194 Zv9_00049196	44.8997	43.4167	43.8507	15.1733	17.8937	10.4905	8.57427	9.03799	1.21101	0.02	1	0.865755
XLOC_018433	chr16	15255555	15293928	XLOC_018433	Zv9_00037877	0.117825	0.175053	0.0680537	0.0442774	0.851202	13.5901	9.41248	10.2339	1.21119	0.02	1	0.865755
XLOC_017021	chr15	28625647	28656930	XLOC_017021	Zv9_00034943 Zv9_00034941 Zv9_00034942	0.0482841	0.106494	0.163633	0.121349	1.70357	3.84942	2.99597	4.49492	1.21312	0.02	1	0.865755
XLOC_020958	chr19	2399761	2402369	XLOC_020958	Zv9_00043068	0	0	0.0601223	0.0202504	0.167813	4.64826	3.20448	5.26325	1.21338	0.02	1	0.865755
XLOC_027444	chr25	1943781	2012894	XLOC_027444	Zv9_00056438 Zv9_00056439	0	0.0380718	0.0277088	0.0196777	0.195747	4.64799	3.35111	3.46686	1.21697	0.02	1	0.865755
XLOC_003793	chr3	40598996	40659732	XLOC_003793	Zv9_00007757 Zv9_00007758	17.2814	46.3951	41.3205	17.2276	17.8461	7.69626	5.68603	6.27879	1.22161	0.02	1	0.865755
XLOC_000693	chr1	8813279	8934591	XLOC_000693	Zv9_00001483	88.789	33.8052	62.164	34.4985	6.87612	7.50474	5.84481	2.3977	1.22511	0.02	1	0.865755
XLOC_005409	chr5	10922414	10952904	XLOC_005409	Zv9_00010647	0.0163316	0.00784384	0.0251299	0.100648	0.463168	13.8551	22.0471	2.79123	1.23053	0.02	1	0.865755
XLOC_023871	chr21	22611757	23024706	XLOC_023871	Zv9_00048964 Zv9_00048965 Zv9_00048962 Zv9_00048963 Zv9_00048961	0.681177	0	0	0	1.10483	22.0471	30.9399	0	1.23608	0.02	1	0.865755
XLOC_005645	chr5	33982780	33994617	XLOC_005645	Zv9_00011166	0	0.00380943	0.000936871	0.0299248	0.390214	44.8183	64.3452	0	1.23883	0.02	1	0.865755
XLOC_010372	chr8	24095036	24190309	XLOC_010372	Zv9_00021056 Zv9_00021058 Zv9_00021057 Zv9_00021055	4.52165	5.69124	0	0	0	0	0	0	1.25029	0.02	1	0.865755
XLOC_005155	chr4	47303991	47306214	XLOC_005155	Zv9_00010183	0.311511	0	10.6657	2.29711	11.1672	0.825216	0.0111555	0	1.2551	0.02	1	0.865755
XLOC_020379	chr18	42339132	42339358	XLOC_020379	Zv9_00041913	22.1565	0.339919	0.0751817	0.519019	4.06152	0.880881	3.52986	22.7647	1.29845	0.02	1	0.865755
XLOC_027746	chr25	32689061	32717347	XLOC_027746	Zv9_00057056 Zv9_00057057 Zv9_00057058	0.00914286	0.147257	0.646486	1.86816	1.85584	0.22671	0.289107	18.0066	1.1042	0.03	1	0.928072
XLOC_013543	chr11	36003619	36012276	XLOC_013543	Zv9_00027699 Zv9_00027700	140.636	15.0948	13.7883	17.3851	14.6273	12.012	10.6203	2.31521	1.10472	0.03	1	0.928072
XLOC_018410	chr16	13539772	13549065	XLOC_018410	Zv9_00037836	0.0766185	0.00919112	0.0957632	0.460706	0.486588	0.0401133	0.100858	9.30319	1.10969	0.03	1	0.928072
XLOC_007448	chr6	58525463	58576767	XLOC_007448	Zv9_00015080 Zv9_00015083 Zv9_00015079 Zv9_00015081 Zv9_00015082	3.28599	4.36135	4.01139	3.06223	12.3307	2.03325	1.65239	2.58042	1.11252	0.03	1	0.928072
XLOC_016045	chr14	29458951	29479868	XLOC_016045	Zv9_00032932 Zv9_00032931 Zv9_00032934 Zv9_00032933	10.9424	18.5651	24.9642	15.4278	107.294	33.0602	24.9468	20.9718	1.11292	0.03	1	0.928072
XLOC_001178	chr1	60279914	60289633	XLOC_001178	Zv9_00002553 Zv9_00002555 Zv9_00002556 Zv9_00002554 Zv9_00002557	33.2195	10.6875	12.3275	11.3192	7.94097	8.66803	6.93858	3.44682	1.11343	0.03	1	0.928072
XLOC_004851	chr4	11446253	11453146	XLOC_004851	Zv9_00009633	0	0	0.129279	0.54767	0.737502	0.955383	0.632187	5.5283	1.11355	0.03	1	0.928072
XLOC_002010	chr2	9746984	9760639	XLOC_002010	Zv9_00004160	162.007	57.3673	55.2613	51.8523	58.5076	41.1751	44.0913	25.729	1.11534	0.03	1	0.928072
XLOC_025932	chr23	33566042	33575091	XLOC_025932	Zv9_00053246	0.615623	0.800224	1.19196	1.60895	2.7402	2.22791	1.96468	10.0969	1.117	0.03	1	0.928072
XLOC_015277	chr13	152928	155249	XLOC_015277	Zv9_00031305	56.2714	15.8164	11.3573	18.6333	13.1467	12.5022	7.52795	2.17904	1.12164	0.03	1	0.928072
XLOC_028028	Zv9_NA971	1967	2422	XLOC_028028	Zv9_00057548	122.85	17.8359	12.4158	19.8006	33.9313	19.5349	15.1052	14.539	1.12214	0.03	1	0.928072
XLOC_005730	chr5	40089204	40090264	XLOC_005730	Zv9_00011330	0	0	0	4.58934	0.506626	0.976571	0.632815	1.01861	1.12398	0.03	1	0.928072
XLOC_022240	chr20	29235472	29242305	XLOC_022240	Zv9_00045683 Zv9_00045685 Zv9_00045684	123.653	23.4944	11.1709	23.879	26.3124	12.2409	10.6732	0	1.12824	0.03	1	0.928072
XLOC_001273	chr2	5436263	5452732	XLOC_001273	Zv9_00002729 Zv9_00002728	0.887441	0.300207	0.616957	2.78533	3.88975	5.02488	3.6405	24.0207	1.12923	0.03	1	0.928072
XLOC_014310	chr12	4644864	4658821	XLOC_014310	Zv9_00029302	439.858	136.464	176.428	140.538	103.982	74.1759	76.3114	28.443	1.13045	0.03	1	0.928072
XLOC_002015	chr2	9974222	9981553	XLOC_002015	Zv9_00004166 Zv9_00004165	0	0	0.0577172	0.225029	26.9081	4.8179	6.15205	8.49562	1.13293	0.03	1	0.928072
XLOC_028836	Zv9_NA758	689	21315	XLOC_028836	Zv9_00058583 Zv9_00058582	15.5861	5.06288	3.8624	3.85749	5.02382	2.77714	1.74187	1.35058	1.13337	0.03	1	0.928072
XLOC_009799	chr8	26096984	26146600	XLOC_009799	Zv9_00019892 Zv9_00019890 Zv9_00019893 Zv9_00019891	0.53799	0.873378	1.14685	2.78805	19.3973	4.1194	4.54224	7.34518	1.13365	0.03	1	0.928072
XLOC_003562	chr3	24966149	24972645	XLOC_003562	Zv9_00007288 Zv9_00007289	1.99331	1.13844	0.277614	11.431	3.00017	3.74899	1.5687	0.944989	1.13512	0.03	1	0.928072
XLOC_011940	chr10	17450895	17452243	XLOC_011940	Zv9_00024272	0	0	3.63585	6.35147	6.20005	9.01331	10.7616	27.4464	1.13538	0.03	1	0.928072
XLOC_021761	chr19	32633441	32647893	XLOC_021761	Zv9_00044741	0.112273	0.0359198	2.78502	5.57428	6.47229	6.92586	8.92965	22.9874	1.13812	0.03	1	0.928072
XLOC_012593	chr10	38129159	38141596	XLOC_012593	Zv9_00025655	0.0899615	0.0817749	0.62547	2.18552	19.2219	3.89302	4.30284	7.61742	1.14051	0.03	1	0.928072
XLOC_012437	chr10	22220085	22234871	XLOC_012437	Zv9_00025316	1.71731	1.18922	1.09399	1.89405	0	0	0	5.7731	1.14147	0.03	1	0.928072
XLOC_025344	chr23	24402770	24419532	XLOC_025344	Zv9_00051977 Zv9_00051978	0.0368385	0.0349028	0.50713	0.301043	0.267386	0.369834	5.76015	2.23423	1.14413	0.03	1	0.928072
XLOC_001704	chr2	43810696	43858844	XLOC_001704	Zv9_00003574 Zv9_00003580 Zv9_00003575 Zv9_00003579 Zv9_00003572 Zv9_00003573 Zv9_00003578 Zv9_00003577 Zv9_00003571 Zv9_00003576	1.05606	1.92945	2.22485	3.35301	16.8321	5.31235	4.55018	7.8188	1.14564	0.03	1	0.928072
XLOC_000069	chr1	6731993	6733682	XLOC_000069	Zv9_00000167	9.49225	7.69908	6.83611	23.2674	0	0	0	0	1.14785	0.03	1	0.928072
XLOC_007656	chr6	19470225	19491779	XLOC_007656	Zv9_00015539 Zv9_00015540 Zv9_00015541	7.78115	17.3492	3.64673	0.912407	0.839732	3.70342	1.81477	2.09143	1.1529	0.03	1	0.928072
XLOC_001141	chr1	57108858	57211282	XLOC_001141	Zv9_00002457 Zv9_00002456	0	0	0	0	0	5.76492	31.2889	15.9081	1.1577	0.03	1	0.928072
XLOC_026269	chr24	24349924	24351946	XLOC_026269	Zv9_00053970	0	0.0253932	0	0	0.0375386	1.40816	4.10355	1.36356	1.15855	0.03	1	0.928072
XLOC_003166	chr3	55965688	55983956	XLOC_003166	Zv9_00006499 Zv9_00006498 Zv9_00006496 Zv9_00006497	0	0	0.151169	0.484308	50.4251	5366.43	14974.4	2626.07	1.16024	0.03	1	0.928072
XLOC_028870	Zv9_NA976	5	1132	XLOC_028870	Zv9_00058646 Zv9_00058645	55.7667	19.9921	22.8727	15.153	14.3468	6.73866	7.39849	4.19124	1.16038	0.03	1	0.928072
XLOC_027608	chr25	17915486	17939516	XLOC_027608	Zv9_00056800	0.539473	0.842291	0.355224	0.360984	5.19242	5.05426	6.75364	8.46687	1.16105	0.03	1	0.928072
XLOC_007792	chr6	38944764	38982275	XLOC_007792	Zv9_00015860 Zv9_00015862 Zv9_00015861	0.604092	0.143757	0.192485	0.186215	0.411424	19.5487	10.9359	13.8328	1.16145	0.03	1	0.928072
XLOC_011325	chr9	8943609	8954451	XLOC_011325	Zv9_00022979 Zv9_00022980	0	0	3.71736	2.03495	0	4.94249	4.86176	7.50124	1.16255	0.03	1	0.928072
XLOC_020181	chr18	17242576	17257924	XLOC_020181	Zv9_00041509	0.103323	0.092163	0.0884021	0.0155526	0.0588077	6.83108	3.37343	4.13348	1.16429	0.03	1	0.928072
XLOC_025571	chr23	44613734	44633208	XLOC_025571	Zv9_00052424	0.42655	0.781609	0.843363	0.591394	9.61675	4.48123	3.7405	3.34808	1.16524	0.03	1	0.928072
XLOC_021477	chr19	2885052	2903306	XLOC_021477	Zv9_00044133 Zv9_00044134	12.4481	21.8704	5.73321	2.62062	1.44125	1.10818	1.48248	1.40092	1.16574	0.03	1	0.928072
XLOC_022996	chr20	48786562	48789596	XLOC_022996	Zv9_00047217	0	0	0.0831426	0.0367031	0.297468	24.9968	64.9375	16.9149	1.16598	0.03	1	0.928072
XLOC_018754	chr16	44817569	44825606	XLOC_018754	Zv9_00038588 Zv9_00038589	0.95957	6.01863	2.87727	1.01243	0.0965815	0.288433	0.352768	0.374654	1.16697	0.03	1	0.928072
XLOC_027317	chr25	32246436	32262844	XLOC_027317	Zv9_00056173 Zv9_00056171 Zv9_00056172	2.50075	2.74898	6.6756	3.95779	9.43814	1094.59	2785.77	295.841	1.16735	0.03	1	0.928072
XLOC_013134	chr11	43121086	43125547	XLOC_013134	Zv9_00026763	0	0	0	0.0343734	0.998008	15.1249	35.3298	1.80848	1.16756	0.03	1	0.928072
XLOC_015688	chr13	45382808	45402065	XLOC_015688	Zv9_00032198 Zv9_00032197	15.3047	27.2831	4.93781	5.12331	3.78633	5.36528	6.15192	8.02612	1.16756	0.03	1	0.928072
XLOC_019202	chr17	27293548	27308493	XLOC_019202	Zv9_00039514	0	0	0	0.0112058	0.122129	8.62858	3.53827	4.99454	1.16813	0.03	1	0.928072
XLOC_026712	chr24	24643864	24648001	XLOC_026712	Zv9_00054859	0.0265219	0.0381972	0.0816092	0.157663	0.355171	20.581	55.4875	19.387	1.16845	0.03	1	0.928072
XLOC_003635	chr3	30304931	30309569	XLOC_003635	Zv9_00007438	0	0	0	0.0424858	1.87144	5.20126	8.49075	0.290223	1.16868	0.03	1	0.928072
XLOC_023206	chr21	7520829	7526416	XLOC_023206	Zv9_00047648 Zv9_00047649	0	0.010281	0.0205593	0.0435814	0.132582	12.1835	42.1329	19.4606	1.16906	0.03	1	0.928072
XLOC_008882	chr7	10666369	10695547	XLOC_008882	Zv9_00018079 Zv9_00018078 Zv9_00018077	0	23.3221	14.1009	9.42969	1.25434	2.38988	3.1251	1.58479	1.16961	0.03	1	0.928072
XLOC_001849	chr2	57557512	57704490	XLOC_001849	Zv9_00003845 Zv9_00003843	0.351599	0.476952	0.946657	0.340474	1.65295	5.78193	12.3392	3.65897	1.16986	0.03	1	0.928072
XLOC_022444	chr20	48731408	48757182	XLOC_022444	Zv9_00046106 Zv9_00046107 Zv9_00046104 Zv9_00046105	2.53488	8.0696	3.72253	0.962373	0.6352	0	0	0	1.17087	0.03	1	0.928072
XLOC_023381	chr21	24508857	24525168	XLOC_023381	Zv9_00048032 Zv9_00048031	0	0	0	0.428758	5.99195	9.89657	8.54563	19.0759	1.17238	0.03	1	0.928072
XLOC_012978	chr11	26493558	26510003	XLOC_012978	Zv9_00026487 Zv9_00026477 Zv9_00026486 Zv9_00026480 Zv9_00026494 Zv9_00026492 Zv9_00026489 Zv9_00026478 Zv9_00026479 Zv9_00026491 Zv9_00026493 Zv9_00026482 Zv9_00026490 Zv9_00026483 Zv9_00026485 Zv9_00026481 Zv9_00026484 Zv9_00026476 Zv9_00026488	0	89.9004	57.0121	31.728	36.8888	23.3773	0	0	1.17269	0.03	1	0.928072
XLOC_021476	chr19	2810596	2872257	XLOC_021476	Zv9_00044121 Zv9_00044127 Zv9_00044124 Zv9_00044122 Zv9_00044131 Zv9_00044126 Zv9_00044128 Zv9_00044132 Zv9_00044129 Zv9_00044125 Zv9_00044120	9.24251	43.8411	27.0731	16.1498	8.07889	10.5403	10.0584	12.1444	1.17392	0.03	1	0.928072
XLOC_023330	chr21	19542762	19544429	XLOC_023330	Zv9_00047912 Zv9_00047913	0	0.0296667	0.00476167	3.1954	10.9597	51.9491	96.7555	14.6679	1.17559	0.03	1	0.928072
XLOC_005387	chr5	8637815	8676024	XLOC_005387	Zv9_00010604	0.0121579	0.0273614	0.0109262	0.0300611	0.0670792	1.29239	3.89515	1.77732	1.1762	0.03	1	0.928072
XLOC_024692	chr22	1229155	1250996	XLOC_024692	Zv9_00050545	39.404	2.26963	7.21836	12.0344	21.0874	12.0484	11.695	8.53324	1.17642	0.03	1	0.928072
XLOC_023261	chr21	11434973	11489492	XLOC_023261	Zv9_00047760 Zv9_00047766 Zv9_00047761 Zv9_00047762 Zv9_00047765 Zv9_00047759 Zv9_00047763 Zv9_00047764	35.3042	32.4152	42.7301	11.3786	12.5335	5.40965	4.82187	3.27586	1.17801	0.03	1	0.928072
XLOC_022324	chr20	35462965	35487578	XLOC_022324	Zv9_00045860 Zv9_00045859	26.8943	39.6012	3.69364	1.8158	1.25088	0.29212	0.156144	0.248776	1.1814	0.03	1	0.928072
XLOC_015041	chr13	30148867	30159997	XLOC_015041	Zv9_00030875	81.1788	50.4879	61.6587	32.3591	15.6044	8.88349	6.06208	6.91345	1.18214	0.03	1	0.928072
XLOC_011579	chr9	35455695	35481287	XLOC_011579	Zv9_00023532 Zv9_00023526 Zv9_00023529 Zv9_00023530 Zv9_00023531 Zv9_00023528 Zv9_00023527	31.5907	1.40199	0	10.5818	8.66581	13.8286	6.49554	3.92865	1.18314	0.03	1	0.928072
XLOC_007816	chr6	39991154	39994468	XLOC_007816	Zv9_00015907 Zv9_00015905 Zv9_00015906	12.5528	18.35	4.44248	2.90925	2.41649	2.62133	1.76558	2.53399	1.18343	0.03	1	0.928072
XLOC_025583	chr23	44855050	44872309	XLOC_025583	Zv9_00052452 Zv9_00052450 Zv9_00052453 Zv9_00052451	1.25656	0.951632	1.21962	1.19126	1.57685	73.5747	50.6189	55.6891	1.18382	0.03	1	0.928072
XLOC_024967	chr22	25814418	25817096	XLOC_024967	Zv9_00051142 Zv9_00051141 Zv9_00051139 Zv9_00051140	0	0	3.44896	19.724	3.86001	10.5927	4.11663	0.706985	1.1841	0.03	1	0.928072
XLOC_015000	chr13	25944732	25953480	XLOC_015000	Zv9_00030785 Zv9_00030786	6.57282	9.99188	21.6407	28.2523	8.54875	33.0565	0	0	1.18493	0.03	1	0.928072
XLOC_023677	chr21	3658155	3690087	XLOC_023677	Zv9_00048539	0.274117	0.221783	6.88138	27.7597	14.4252	8.72737	18.3461	8.50982	1.18508	0.03	1	0.928072
XLOC_017937	chr16	25838207	25958948	XLOC_017937	Zv9_00036886 Zv9_00036885	0.8043	0.780934	0.281331	0.166363	0.127357	5.38742	3.4505	4.69365	1.18617	0.03	1	0.928072
XLOC_027522	chr25	7930833	7934184	XLOC_027522	Zv9_00056607	0	0	9.88932	0	0	3.94501	6.50275	8.75219	1.18776	0.03	1	0.928072
XLOC_009050	chr7	27425345	27434010	XLOC_009050	Zv9_00018398 Zv9_00018397	3.98073	1.74021	3.8961	6.46158	7.62212	60.9775	45.8746	56.7416	1.18877	0.03	1	0.928072
XLOC_009439	chr7	74699300	74711099	XLOC_009439	Zv9_00019196	0.0174593	0.138308	0.0470087	0.0239447	0.0618909	1.87414	4.38596	1.54209	1.18957	0.03	1	0.928072
XLOC_006263	chr5	21667501	21716985	XLOC_006263	Zv9_00012484 Zv9_00012479 Zv9_00012482 Zv9_00012480 Zv9_00012486 Zv9_00012483 Zv9_00012485 Zv9_00012481	0	0	0	0	0	8.9898	6.64762	7.91665	1.19012	0.03	1	0.928072
XLOC_016914	chr15	19242666	19303749	XLOC_016914	Zv9_00034720 Zv9_00034721	3.81038	7.73851	1.49274	0.32094	0.44536	1.62188	1.71035	1.432	1.19092	0.03	1	0.928072
XLOC_001340	chr2	10910594	10917531	XLOC_001340	Zv9_00002849	0	0	0	0	17.2474	7.68313	5.87697	7.79817	1.1912	0.03	1	0.928072
XLOC_011580	chr9	35806142	35826126	XLOC_011580	Zv9_00023537 Zv9_00023535 Zv9_00023533 Zv9_00023536 Zv9_00023534 Zv9_00023538	10.3091	4.20691	6.47105	4.62654	0.189291	0.184368	0.158419	0.335639	1.19236	0.03	1	0.928072
XLOC_008276	chr7	25332587	25341183	XLOC_008276	Zv9_00016825	2.77075	4.29996	1.00612	0.147168	0.611305	0.0671371	0.0431355	0.13001	1.19413	0.03	1	0.928072
XLOC_014882	chr13	12653367	12855096	XLOC_014882	Zv9_00030507 Zv9_00030505 Zv9_00030508 Zv9_00030504	23.9286	14.8025	20.5072	8.96265	3.47343	4.25056	4.71963	6.34762	1.19544	0.03	1	0.928072
XLOC_010601	chr8	52265908	52266858	XLOC_010601	Zv9_00021488	0	0	0	0	1.25234	2.66104	2.26983	3.85581	1.19624	0.03	1	0.928072
XLOC_002032	chr2	10894260	10910976	XLOC_002032	Zv9_00004200 Zv9_00004196 Zv9_00004199 Zv9_00004201 Zv9_00004202 Zv9_00004197 Zv9_00004198	0	0	0	0	4.35843	6.53697	4.32751	8.5336	1.19816	0.03	1	0.928072
XLOC_026829	chr24	37523107	37540447	XLOC_026829	Zv9_00055122 Zv9_00055124 Zv9_00055123 Zv9_00055125	1.43535	1.65759	3.92102	6.56592	3.88864	14.8391	16.8285	16.4914	1.19859	0.03	1	0.928072
XLOC_019122	chr17	22590181	22777013	XLOC_019122	Zv9_00039349 Zv9_00039348 Zv9_00039350	61.4832	39.3768	56.7891	34.6807	10.4257	17.8098	11.0359	11.2849	1.20051	0.03	1	0.928072
XLOC_011997	chr10	23319600	23328699	XLOC_011997	Zv9_00024393	93.8605	37.9807	49.7527	29.8479	15.7503	10.7397	10.6419	9.9167	1.20159	0.03	1	0.928072
XLOC_003893	chr3	55972022	55980014	XLOC_003893	Zv9_00007966 Zv9_00007968 Zv9_00007967	0	0	0.11478	0.619214	46.9774	4915.09	9296.05	1224.48	1.20191	0.03	1	0.928072
XLOC_024354	chr22	9849568	9873060	XLOC_024354	Zv9_00049882	0	0	0.0948085	0.198611	0	2.51971	4.7362	0.299865	1.20315	0.03	1	0.928072
XLOC_015054	chr13	31027985	31043680	XLOC_015054	Zv9_00030893	0.440359	0.0636082	10.5339	16.1422	35.2916	18.6089	21.6773	31.9007	1.20321	0.03	1	0.928072
XLOC_026164	chr24	10218060	10310485	XLOC_026164	Zv9_00053751	0	0.00909575	0.0439323	0.0537228	0.225203	3.70865	1.34301	2.7809	1.21111	0.03	1	0.928072
XLOC_019032	chr17	11939211	12020680	XLOC_019032	Zv9_00039150 Zv9_00039148 Zv9_00039149 Zv9_00039152 Zv9_00039151	63.9611	41.1887	61.9573	14.6086	2.50118	4.51489	6.84605	11.5564	1.21325	0.03	1	0.928072
XLOC_024896	chr22	18082683	18336302	XLOC_024896	Zv9_00050986	0.408225	0.295432	0.58526	0.47866	0.0415539	0.846258	4.8746	3.27127	1.21344	0.03	1	0.928072
XLOC_013618	chr11	43150003	43152089	XLOC_013618	Zv9_00027849	0	0	0.0586546	5.08946	10.7398	27.3809	29.7406	3.69041	1.21483	0.03	1	0.928072
XLOC_026174	chr24	12738102	12743844	XLOC_026174	Zv9_00053764	1185.13	510.025	1114.98	209.819	11.9326	0.36063	0.127282	0.0409972	1.21502	0.03	1	0.928072
XLOC_028240	Zv9_scaffold3562	67578	120836	XLOC_028240	Zv9_00057863 Zv9_00057865 Zv9_00057864 Zv9_00057866	21.4317	7.33641	13.9064	19.1635	0.229047	2.90559	4.26068	21.2816	1.21543	0.03	1	0.928072
XLOC_020139	chr18	14270178	14275080	XLOC_020139	Zv9_00041444	12.8729	16.578	7.15749	4.22973	4.78848	2.36653	2.29924	2.0992	1.21739	0.03	1	0.928072
XLOC_000755	chr1	16421914	16435160	XLOC_000755	Zv9_00001632 Zv9_00001633	15.1731	22.7366	9.07968	4.88811	3.22628	4.17614	3.7961	3.01981	1.21846	0.03	1	0.928072
XLOC_027320	chr25	32509834	32512812	XLOC_027320	Zv9_00056179 Zv9_00056181 Zv9_00056180	102.222	125.54	50.9646	37.1153	30.8117	11.1285	8.28919	9.69242	1.2186	0.03	1	0.928072
XLOC_016031	chr14	27257224	27264222	XLOC_016031	Zv9_00032908	24.9109	35.6667	8.88942	4.06885	4.63923	3.31499	2.72837	4.53947	1.22016	0.03	1	0.928072
XLOC_013139	chr11	43165277	43177085	XLOC_013139	Zv9_00026768	0	0	0.0945566	2.52725	8.11031	16.5211	18.6398	2.49145	1.22087	0.03	1	0.928072
XLOC_007228	chr6	34798399	34881665	XLOC_007228	Zv9_00014657 Zv9_00014647	0.234293	0.629481	0.507184	0.826828	0.239056	5.79219	4.72064	3.69562	1.22121	0.03	1	0.928072
XLOC_025672	chr23	5703089	5736471	XLOC_025672	Zv9_00052615 Zv9_00052614 Zv9_00052616 Zv9_00052617	4.17962	0.686746	2.77093	1.40358	0.451778	35.7599	26.9296	24.8617	1.22168	0.03	1	0.928072
XLOC_006193	chr5	12815477	12897914	XLOC_006193	Zv9_00012334 Zv9_00012335	89.911	39.3433	66.6429	18.5114	3.19368	2.43352	2.10184	2.87759	1.22264	0.03	1	0.928072
XLOC_013261	chr11	1387910	1475048	XLOC_013261	Zv9_00027028 Zv9_00027029 Zv9_00027027	0.441735	0.701542	0.869685	0.32045	0.606292	12.8526	8.56985	15.3217	1.22423	0.03	1	0.928072
XLOC_000678	chr1	7725183	7729238	XLOC_000678	Zv9_00001445	102.686	89.7208	670.257	1558.61	2512.71	3368.04	3691.9	1826.81	1.22438	0.03	1	0.928072
XLOC_021270	chr19	34197682	34215488	XLOC_021270	Zv9_00043667 Zv9_00043671 Zv9_00043668 Zv9_00043670 Zv9_00043669	2.86747	5.85885	11.6472	14.8362	6.47747	87.4358	64.177	98.8179	1.2247	0.03	1	0.928072
XLOC_025800	chr23	21738952	21741120	XLOC_025800	Zv9_00052931	0.270603	0.194067	0.21946	1.92747	30.7333	47.0203	63.9603	7.80583	1.22474	0.03	1	0.928072
XLOC_000881	chr1	29792525	29818743	XLOC_000881	Zv9_00001927	72.2287	40.1566	68.2771	43.5604	22.4998	13.7791	9.36811	5.68201	1.22518	0.03	1	0.928072
XLOC_015016	chr13	28640891	28668863	XLOC_015016	Zv9_00030810 Zv9_00030809	0.158264	0.460252	0.674136	0.832884	0.530748	13.5311	22.1755	3.25539	1.22638	0.03	1	0.928072
XLOC_005690	chr5	38294029	38302099	XLOC_005690	Zv9_00011254	0	0.0135289	0.15867	1.58475	3.72197	48.4371	71.9777	6.49869	1.22868	0.03	1	0.928072
XLOC_025917	chr23	31991133	32002287	XLOC_025917	Zv9_00053224 Zv9_00053222 Zv9_00053223	3.15387	3.80214	4.57725	2.71101	2.62252	21.3537	18.0063	23.4429	1.23141	0.03	1	0.928072
XLOC_020617	chr18	14448869	14487584	XLOC_020617	Zv9_00042382 Zv9_00042379 Zv9_00042371 Zv9_00042380 Zv9_00042372 Zv9_00042375 Zv9_00042376 Zv9_00042381 Zv9_00042373 Zv9_00042378 Zv9_00042374	0	0	0	0	0	15.9657	11.6049	10.3855	1.23245	0.03	1	0.928072
XLOC_017681	chr15	46924084	46929042	XLOC_017681	Zv9_00036365 Zv9_00036363 Zv9_00036362 Zv9_00036364	38.6219	6.93518	5.34918	7.44823	14.0729	14.5539	18.4689	32.8319	1.2377	0.03	1	0.928072
XLOC_011681	chr9	52889600	52913786	XLOC_011681	Zv9_00023752 Zv9_00023754 Zv9_00023753	50.3843	31.7808	51.5636	27.661	5.00551	7.02193	7.28354	3.97021	1.24029	0.03	1	0.928072
XLOC_005473	chr5	21715558	21739755	XLOC_005473	Zv9_00010780 Zv9_00010779	0	0	0	0	0	6.24042	5.17547	5.37507	1.24139	0.03	1	0.928072
XLOC_013136	chr11	43143095	43144975	XLOC_013136	Zv9_00026765	0	0	0.188892	6.09577	12.1747	29.2241	27.8778	4.21969	1.24588	0.03	1	0.928072
XLOC_010897	chr9	23665019	23682462	XLOC_010897	Zv9_00022109 Zv9_00022107 Zv9_00022108 Zv9_00022110	87.2151	107.82	29.8412	28.1874	47.1655	21.3102	17.5364	20.6415	1.26424	0.03	1	0.928072
XLOC_026197	chr24	15559281	15573678	XLOC_026197	Zv9_00053815 Zv9_00053816 Zv9_00053814	5.18061	5.94893	0.92516	0.59457	0.721006	0.415848	0.399869	0.320677	1.29133	0.03	1	0.928072
XLOC_011768	chr10	2613745	2622656	XLOC_011768	Zv9_00023934 Zv9_00023935	0.119817	0	3.09148	5.97351	4.84641	0.640595	1.90753	40.7521	1.10882	0.04	1	0.964649
XLOC_014646	chr12	43471031	43495615	XLOC_014646	Zv9_00030014 Zv9_00030015	0.345742	0.421507	0.615822	0.247584	4.52855	0.16218	0.0665848	0.0786702	1.10905	0.04	1	0.964649
XLOC_021658	chr19	20594049	20596447	XLOC_021658	Zv9_00044531	0	0	0.152175	0.343999	1.01444	0.322322	0.277709	12.5108	1.11007	0.04	1	0.964649
XLOC_026946	chr25	871102	878741	XLOC_026946	Zv9_00055408	78.4384	25.8512	29.8153	25.1486	20.4287	16.7806	17.0961	10.7234	1.11215	0.04	1	0.964649
XLOC_003925	chr3	59434890	59482793	XLOC_003925	Zv9_00008045 Zv9_00008043 Zv9_00008042 Zv9_00008044	0.150228	0	4.82215	11.8757	17.6675	21.6803	19.0502	147.511	1.11311	0.04	1	0.964649
XLOC_013540	chr11	35635064	35756018	XLOC_013540	Zv9_00027696	205.086	23.2086	21.3858	40.6766	34.2257	37.1731	37.8866	42.4602	1.11455	0.04	1	0.964649
XLOC_009844	chr8	29243691	29259320	XLOC_009844	Zv9_00019975 Zv9_00019974 Zv9_00019976	88.0896	26.8499	28.396	33.8785	28.137	20.5756	18.1164	13.2398	1.11553	0.04	1	0.964649
XLOC_005161	chr4	48029344	48029606	XLOC_005161	Zv9_00010189	0	0	0.697524	0	0.655707	0	0.152607	5.55746	1.11648	0.04	1	0.964649
XLOC_023809	chr21	16792458	16830821	XLOC_023809	Zv9_00048835 Zv9_00048836	0	0.0300654	0.435246	0.827783	16.7536	1.60324	2.30546	3.51627	1.11785	0.04	1	0.964649
XLOC_019564	chr17	9776759	9795116	XLOC_019564	Zv9_00040243 Zv9_00040242	1.67311	0.819394	2.4561	65.9699	8.12814	15.134	7.85828	2.79482	1.11806	0.04	1	0.964649
XLOC_005924	chr5	64530000	64535687	XLOC_005924	Zv9_00011747	43.6079	2.2169	7.40738	13.1084	9.66782	7.52014	6.07103	4.86622	1.11912	0.04	1	0.964649
XLOC_011730	chr10	95156	108340	XLOC_011730	Zv9_00023866 Zv9_00023864 Zv9_00023865 Zv9_00023867	93.8026	30.226	26.3538	31.5813	29.3111	18.5573	16.8853	11.8574	1.12046	0.04	1	0.964649
XLOC_027409	chr25	38374462	38415211	XLOC_027409	Zv9_00056363 Zv9_00056364 Zv9_00056359 Zv9_00056360	12.7159	1.29357	1.79787	2.03076	0.975545	0	0	0	1.12216	0.04	1	0.964649
XLOC_026257	chr24	22327981	22357499	XLOC_026257	Zv9_00053953 Zv9_00053955 Zv9_00053954	127.001	26.8774	21.8987	20.4118	29.1434	10.5742	9.05237	7.59206	1.12305	0.04	1	0.964649
XLOC_003762	chr3	37966660	37967287	XLOC_003762	Zv9_00007687	0	0	13.3579	2.89697	2.2653	1.29444	0.431297	0	1.12378	0.04	1	0.964649
XLOC_027734	chr25	31352554	31419589	XLOC_027734	Zv9_00057033 Zv9_00057035 Zv9_00057034 Zv9_00057036	0.308222	1.41172	2.8326	11.5704	20.3231	23.4034	16.8537	104.253	1.124	0.04	1	0.964649
XLOC_009476	chr8	87979	118740	XLOC_009476	Zv9_00019256	144.872	30.6592	29.176	21.2571	16.0174	10.661	9.16649	4.2298	1.12505	0.04	1	0.964649
XLOC_012810	chr11	7612417	7882969	XLOC_012810	Zv9_00026134 Zv9_00026142 Zv9_00026132 Zv9_00026133 Zv9_00026139 Zv9_00026129 Zv9_00026147 Zv9_00026143 Zv9_00026138 Zv9_00026144 Zv9_00026145 Zv9_00026135 Zv9_00026140 Zv9_00026146 Zv9_00026141 Zv9_00026137 Zv9_00026148 Zv9_00026136 Zv9_00026149 Zv9_00026130 Zv9_00026131	0	1.57431	2.18388	0	64.1424	14.2658	11.3481	8.79228	1.1276	0.04	1	0.964649
XLOC_008920	chr7	17324655	17337643	XLOC_008920	Zv9_00018156	0	0	0.0145751	0.0387428	5.02381	0.208604	0.610062	1.18636	1.12789	0.04	1	0.964649
XLOC_002303	chr2	39288266	39431188	XLOC_002303	Zv9_00004764 Zv9_00004763 Zv9_00004765	28.1499	33.9498	10.7488	11.7379	80.6804	16.8448	18.7952	8.95918	1.13945	0.04	1	0.964649
XLOC_022141	chr20	22265476	22269295	XLOC_022141	Zv9_00045486 Zv9_00045487	0.0550753	0.0256698	0.0699011	35.8934	4.98161	0.056844	10.9725	0.43767	1.13952	0.04	1	0.964649
XLOC_020287	chr18	29848306	29857065	XLOC_020287	Zv9_00041728	47.2068	21.0426	22.2144	16.2614	10.2728	8.36698	6.34841	1.35358	1.13977	0.04	1	0.964649
XLOC_009229	chr7	44246677	44357635	XLOC_009229	Zv9_00018804	0.0399615	0.078725	0.130206	0.631794	44.7474	9.34159	9.76873	15.7857	1.14	0.04	1	0.964649
XLOC_017879	chr16	18910894	19007523	XLOC_017879	Zv9_00036766 Zv9_00036770 Zv9_00036767 Zv9_00036771 Zv9_00036769	0.242363	0.992273	0.874061	0.614777	17.5019	6.82264	6.64932	6.5154	1.1422	0.04	1	0.964649
XLOC_021586	chr19	11529477	11647917	XLOC_021586	Zv9_00044368 Zv9_00044370 Zv9_00044367 Zv9_00044369	0.128193	0.211125	0.703585	1.62688	13.0436	3.89468	3.78084	4.71393	1.14327	0.04	1	0.964649
XLOC_012403	chr10	17757850	17758090	XLOC_012403	Zv9_00025247	0	0	0.734725	0	0.668787	0	0	3.23952	1.14789	0.04	1	0.964649
XLOC_024690	chr22	888887	949065	XLOC_024690	Zv9_00050543 Zv9_00050542	0.0225614	0.0124373	0	0.0021713	0.0180997	2.42245	8.07191	2.44935	1.14867	0.04	1	0.964649
XLOC_025138	chr23	3641008	3655159	XLOC_025138	Zv9_00051517 Zv9_00051518 Zv9_00051519	0	0.0832706	0.0508864	0.0203237	0.216314	20.3874	72.1058	27.8891	1.15048	0.04	1	0.964649
XLOC_026035	chr23	44783640	44793470	XLOC_026035	Zv9_00053483	0.471695	0.748917	0.87964	0.733285	8.25755	3.77169	3.24372	3.91704	1.15112	0.04	1	0.964649
XLOC_000708	chr1	10005497	10204931	XLOC_000708	Zv9_00001511 Zv9_00001517 Zv9_00001514 Zv9_00001516 Zv9_00001513 Zv9_00001515 Zv9_00001512 Zv9_00001518	0.547814	1.27479	3.09908	5.6517	24.5668	8.11322	7.97486	9.81407	1.15231	0.04	1	0.964649
XLOC_001009	chr1	47331531	47372844	XLOC_001009	Zv9_00002194 Zv9_00002192 Zv9_00002193	4.15057	7.48898	11.9637	13.4214	21.627	16.858	20.3036	47.2517	1.15532	0.04	1	0.964649
XLOC_000692	chr1	8707071	8728826	XLOC_000692	Zv9_00001477 Zv9_00001481 Zv9_00001476 Zv9_00001478 Zv9_00001482 Zv9_00001475 Zv9_00001480	0.303552	0.27395	0.394451	1.43912	1.55823	3.99805	0	0	1.1561	0.04	1	0.964649
XLOC_023133	chr21	2576387	2582903	XLOC_023133	Zv9_00047504	28.1743	70.8008	24.5471	5.55531	0.339423	0.264654	0.157269	0.180352	1.15669	0.04	1	0.964649
XLOC_003429	chr3	13564758	13591670	XLOC_003429	Zv9_00007008 Zv9_00007007	14.3424	7.37878	8.24411	5.70076	1.32226	1.21203	1.12326	0.996013	1.16015	0.04	1	0.964649
XLOC_022614	chr20	6615802	6637505	XLOC_022614	Zv9_00046455 Zv9_00046454	7.479	70.9337	37.0082	13.3095	1.15665	0.221894	0.259348	0.346575	1.16062	0.04	1	0.964649
XLOC_015201	chr13	47341539	47341752	XLOC_015201	Zv9_00031176	51.9752	29.042	25.5907	43.2469	6.45991	16.9885	10.1756	109.436	1.1644	0.04	1	0.964649
XLOC_008289	chr7	25695332	25738552	XLOC_008289	Zv9_00016845 Zv9_00016846	18.1019	49.7757	16.1765	3.56184	4.35314	2.39098	2.65473	6.43038	1.16461	0.04	1	0.964649
XLOC_011885	chr10	10938644	10965788	XLOC_011885	Zv9_00024154 Zv9_00024153	10.7585	31.183	16.2922	8.87436	3.70865	2.83309	3.02477	2.37656	1.16684	0.04	1	0.964649
XLOC_001310	chr2	8501373	8561965	XLOC_001310	Zv9_00002796	3.19164	35.3874	11.4765	6.70508	6.92021	8.65074	12.0646	18.0102	1.16694	0.04	1	0.964649
XLOC_002299	chr2	38689260	38696565	XLOC_002299	Zv9_00004751 Zv9_00004749 Zv9_00004750	1.36736	20.7776	11.411	2.91551	0.307797	0.166132	0.0910006	0	1.16696	0.04	1	0.964649
XLOC_008497	chr7	41486247	41495972	XLOC_008497	Zv9_00017312	4.98445	21.9271	11.5095	6.46219	4.51361	2.15564	2.47028	3.29933	1.16795	0.04	1	0.964649
XLOC_025199	chr23	8691928	8697852	XLOC_025199	Zv9_00051639	0	0	0	0	0.368369	3.76484	1.58722	2.34702	1.17171	0.04	1	0.964649
XLOC_004286	chr4	25036981	25107398	XLOC_004286	Zv9_00008752	0.0114343	0.0110975	0.161272	0.304616	0.22055	1.88241	4.49396	1.79743	1.17232	0.04	1	0.964649
XLOC_020726	chr18	26623108	26659594	XLOC_020726	Zv9_00042632	6.00911	11.1327	2.30492	0.822561	0.721355	1.89678	1.54511	1.66775	1.17235	0.04	1	0.964649
XLOC_025825	chr23	24545116	24550664	XLOC_025825	Zv9_00052981	0	0	0	0.0626895	0.174341	14.8415	7.01459	8.10306	1.17343	0.04	1	0.964649
XLOC_023828	chr21	19537642	19539471	XLOC_023828	Zv9_00048873	0	0.00479575	0.00384439	0.405768	4.06326	19.4221	35.5868	4.08648	1.17663	0.04	1	0.964649
XLOC_013138	chr11	43160567	43162025	XLOC_013138	Zv9_00026767	0.468306	0.129746	0.194975	0.12324	0.514751	45.3663	97.7158	1.59995	1.17812	0.04	1	0.964649
XLOC_018517	chr16	24081132	24109434	XLOC_018517	Zv9_00038054 Zv9_00038053 Zv9_00038055 Zv9_00038052 Zv9_00038051	60.2598	49.1635	69.1784	0	0	0	0	0	1.17841	0.04	1	0.964649
XLOC_019605	chr17	14455376	14532878	XLOC_019605	Zv9_00040326 Zv9_00040329 Zv9_00040324 Zv9_00040327 Zv9_00040328 Zv9_00040325 Zv9_00040323	0.757388	2.22411	2.01042	0.57274	0.317507	15.2608	11.1856	12.6432	1.17988	0.04	1	0.964649
XLOC_013687	chr12	327893	332794	XLOC_013687	Zv9_00027975	0.0170244	0.0279927	0.0157048	0	0.023159	3.88682	2.47655	2.68238	1.18078	0.04	1	0.964649
XLOC_025696	chr23	7846362	7915827	XLOC_025696	Zv9_00052666	0.363749	0.234756	0.184216	0.0340389	0.127427	7.84044	20.9896	8.57244	1.18462	0.04	1	0.964649
XLOC_022506	chr20	54380638	54381047	XLOC_022506	Zv9_00046238	22.4506	14.402	13.0672	36.2614	5.85263	3.60633	3.91308	2.79384	1.18683	0.04	1	0.964649
XLOC_003502	chr3	19737500	19787079	XLOC_003502	Zv9_00007170 Zv9_00007167 Zv9_00007168 Zv9_00007166	0.0742057	0.138981	0.127448	2.21269	1.31077	9.03284	7.68759	7.73403	1.18892	0.04	1	0.964649
XLOC_003894	chr3	55989789	55991276	XLOC_003894	Zv9_00007969	0	0	0	0.102337	14.5861	1547.01	3106.67	308.097	1.19023	0.04	1	0.964649
XLOC_016454	chr14	22597903	22619314	XLOC_016454	Zv9_00033719 Zv9_00033720	135.088	52.1123	76.8856	40.9596	9.05836	7.26674	9.76943	18.5576	1.19156	0.04	1	0.964649
XLOC_014860	chr13	11265853	11286146	XLOC_014860	Zv9_00030460	225.578	79.9513	113.044	68.6485	27.9484	20.0046	18.2626	9.61348	1.19269	0.04	1	0.964649
XLOC_025740	chr23	17038358	17049463	XLOC_025740	Zv9_00052777 Zv9_00052776	0	0	0	0	0	4.65401	8.80599	0	1.19278	0.04	1	0.964649
XLOC_008801	chr7	655340	661962	XLOC_008801	Zv9_00017916	15.2592	13.2108	6.23779	2.30086	7.93561	2.39163	1.79944	1.52195	1.19376	0.04	1	0.964649
XLOC_002555	chr3	1939946	1959582	XLOC_002555	Zv9_00005273 Zv9_00005274 Zv9_00005275	0	23.1014	20.6333	25.7834	48.2184	69.5198	73.1638	107.369	1.19605	0.04	1	0.964649
XLOC_009355	chr7	60051098	60065569	XLOC_009355	Zv9_00019051 Zv9_00019049 Zv9_00019050 Zv9_00019048	206.991	67.43	110.031	56.2631	10.631	15.4978	15.0088	7.0503	1.197	0.04	1	0.964649
XLOC_013732	chr12	3585226	3612436	XLOC_013732	Zv9_00028086 Zv9_00028085 Zv9_00028087	33.7091	12.4282	19.5298	8.46638	1.29722	5.7597	5.9513	4.69703	1.19738	0.04	1	0.964649
XLOC_015419	chr13	15911845	15948568	XLOC_015419	Zv9_00031589 Zv9_00031587 Zv9_00031590 Zv9_00031591 Zv9_00031588	0	0	0	0.0193289	0.0784676	4.42226	2.04767	1.91358	1.19962	0.04	1	0.964649
XLOC_022288	chr20	33899806	33944631	XLOC_022288	Zv9_00045780 Zv9_00045779	0	0.0404133	0.0323512	0.969841	18.6429	5.14582	4.86328	10.1883	1.19977	0.04	1	0.964649
XLOC_023888	chr21	25055786	25065834	XLOC_023888	Zv9_00049002 Zv9_00049003 Zv9_00049004	0.409881	0.356707	0.471148	0.639583	0.780362	1.48398	5.77669	4.05935	1.19994	0.04	1	0.964649
XLOC_024337	chr22	8906499	8935577	XLOC_024337	Zv9_00049858 Zv9_00049859 Zv9_00049862	25.2716	11.604	23.0617	11.6948	2.84356	1.97708	3.30622	10.6349	1.20054	0.04	1	0.964649
XLOC_019765	chr17	29285539	29308680	XLOC_019765	Zv9_00040666 Zv9_00040667	8.92277	13.9917	1.66258	1.43586	1.74299	2.543	2.7074	3.72994	1.20117	0.04	1	0.964649
XLOC_015508	chr13	26048049	26066152	XLOC_015508	Zv9_00031792 Zv9_00031790 Zv9_00031791 Zv9_00031794 Zv9_00031789	22.2745	148.925	203.681	84.5097	78.3354	46.124	46.2508	23.3246	1.20128	0.04	1	0.964649
XLOC_028307	Zv9_NA345	104339	111380	XLOC_028307	Zv9_00057945	21.8198	14.4131	15.5321	35.2695	0	0	0	0	1.20176	0.04	1	0.964649
XLOC_002438	chr2	54479380	54486002	XLOC_002438	Zv9_00005059 Zv9_00005062 Zv9_00005061 Zv9_00005060	0.0472846	0	1.66655	1.08894	1.07816	4.74149	5.42855	5.80154	1.20227	0.04	1	0.964649
XLOC_005023	chr4	27681883	27684356	XLOC_005023	Zv9_00010035 Zv9_00010034	1.31593	0.224717	4.9373	21.5137	10.1685	13.1218	10.143	11.2236	1.20244	0.04	1	0.964649
XLOC_012357	chr10	13046455	13142779	XLOC_012357	Zv9_00025152 Zv9_00025150 Zv9_00025151	0	0	0.00275013	0	0.179695	5.48118	1.85174	3.8132	1.20271	0.04	1	0.964649
XLOC_022103	chr20	18733769	18757845	XLOC_022103	Zv9_00045414 Zv9_00045415	0.231351	1.46776	0.993715	2.93042	13.8176	5.90735	5.11694	8.23662	1.20636	0.04	1	0.964649
XLOC_022992	chr20	48397090	48413124	XLOC_022992	Zv9_00047210 Zv9_00047213 Zv9_00047211 Zv9_00047212	0.468406	1.17022	0.309411	0.411463	0.382358	0.651366	9.69292	6.48598	1.20649	0.04	1	0.964649
XLOC_017035	chr15	30220186	30221642	XLOC_017035	Zv9_00034969	0	0	0	0.0176286	0.176352	8.98373	30.3559	16.5174	1.20806	0.04	1	0.964649
XLOC_015697	chr13	46088446	46095538	XLOC_015697	Zv9_00032238 Zv9_00032235 Zv9_00032240 Zv9_00032237 Zv9_00032242 Zv9_00032236 Zv9_00032239 Zv9_00032241	0	15.8448	29.9265	37.7199	39.1646	0	52.159	53.9756	1.20925	0.04	1	0.964649
XLOC_009323	chr7	56114012	56114371	XLOC_009323	Zv9_00018986	35.3688	16.8165	22.6507	19.9377	5.28804	3.64222	2.50375	24.6752	1.20964	0.04	1	0.964649
XLOC_010492	chr8	38171899	38217509	XLOC_010492	Zv9_00021269	41.0932	43.5011	27.5084	11.1508	19.5003	11.5517	9.24177	4.71368	1.21074	0.04	1	0.964649
XLOC_006952	chr6	7040854	7052659	XLOC_006952	Zv9_00014088 Zv9_00014087 Zv9_00014086	0.497893	0.166425	2.68402	8.87013	9.48299	14.7645	15.9332	6.44838	1.21327	0.04	1	0.964649
XLOC_027527	chr25	8151851	8181856	XLOC_027527	Zv9_00056631	21.1823	27.6341	11.0787	7.03602	8.99265	4.83599	5.1413	5.29694	1.21854	0.04	1	0.964649
XLOC_008340	chr7	28581195	28823076	XLOC_008340	Zv9_00016965 Zv9_00016963 Zv9_00016964 Zv9_00016967	25.0492	14.9788	19.8071	9.8705	1.41449	1.79569	5.12809	5.91549	1.21977	0.04	1	0.964649
XLOC_022008	chr20	4300194	4380359	XLOC_022008	Zv9_00045254 Zv9_00045253	0.832915	1.76023	3.58794	10.308	1.53692	6.69568	6.3568	1.19402	1.22065	0.04	1	0.964649
XLOC_018172	chr16	45817026	45836969	XLOC_018172	Zv9_00037387 Zv9_00037388 Zv9_00037386	0	0	0.430834	0	0.0534562	5.31599	4.40992	4.52867	1.22088	0.04	1	0.964649
XLOC_017381	chr15	16855014	16859377	XLOC_017381	Zv9_00035710 Zv9_00035709	0.33056	0.21643	0.132941	1.62538	5.53336	10.9315	10.0814	18.104	1.22327	0.04	1	0.964649
XLOC_000811	chr1	21579170	21608983	XLOC_000811	Zv9_00001758 Zv9_00001756 Zv9_00001757 Zv9_00001755	0	0	0.127681	1.52026	12.1938	5.56932	8.11853	10.5714	1.22494	0.04	1	0.964649
XLOC_028364	Zv9_NA650	57212	57484	XLOC_028364	Zv9_00058011	3.42235	1.71711	2.03904	5.51034	0	0	0	0	1.22509	0.04	1	0.964649
XLOC_023671	chr21	2818004	2824189	XLOC_023671	Zv9_00048529	0	0.0481105	0.0549611	0.0581617	1.1251	4.97278	2.57392	6.35195	1.22602	0.04	1	0.964649
XLOC_010382	chr8	24606189	24628969	XLOC_010382	Zv9_00021070 Zv9_00021071	1.06167	0.236721	2.67323	3.07634	6.78432	17.9853	20.8215	5.14163	1.22735	0.04	1	0.964649
XLOC_013621	chr11	43211736	43213613	XLOC_013621	Zv9_00027852	0.0630166	0.0100035	0.112839	0	0.0991815	5.24584	3.68467	3.38545	1.2288	0.04	1	0.964649
XLOC_003807	chr3	42532109	42547356	XLOC_003807	Zv9_00007789 Zv9_00007788	37.7793	20.8179	23.3044	12.2952	3.36391	6.32297	5.55336	3.67767	1.23017	0.04	1	0.964649
XLOC_023790	chr21	14115769	14132666	XLOC_023790	Zv9_00048795 Zv9_00048794	0.0549346	0	1.61325	37.3223	14.2921	10.9337	27.0471	12.3659	1.23042	0.04	1	0.964649
XLOC_005998	chr5	70444969	70460031	XLOC_005998	Zv9_00011925	0.00427963	0.00094029	0.0252978	0.0402431	0.413493	3.27615	1.87909	3.9251	1.23077	0.04	1	0.964649
XLOC_024432	chr22	16757531	16767399	XLOC_024432	Zv9_00050053	0	0.0158929	0.0423785	0.217194	0.260279	11.8773	9.85633	11.6321	1.23312	0.04	1	0.964649
XLOC_012596	chr10	38283421	38408610	XLOC_012596	Zv9_00025660 Zv9_00025663 Zv9_00025659 Zv9_00025658 Zv9_00025661	0.104325	0.295129	0.0471955	0.0772513	0.821082	9.67071	7.51009	9.36005	1.23382	0.04	1	0.964649
XLOC_020866	chr18	47247673	47260650	XLOC_020866	Zv9_00042879 Zv9_00042880	0	0	0	0	18.8096	50.0469	59.1567	0	1.23541	0.04	1	0.964649
XLOC_006302	chr5	24781953	24786045	XLOC_006302	Zv9_00012569	13.7421	16.9069	15.7953	9.28951	7.8156	54.2354	39.9931	64.8911	1.2359	0.04	1	0.964649
XLOC_000841	chr1	24774932	24794152	XLOC_000841	Zv9_00001830 Zv9_00001827 Zv9_00001829 Zv9_00001828	0.108728	0.110002	0.169053	0.137299	0.284921	27.6031	19.1035	16.3871	1.23635	0.04	1	0.964649
XLOC_005156	chr4	47309335	47315093	XLOC_005156	Zv9_00010184	0.381285	0	11.7082	3.83702	9.87062	0.97437	0.0305772	0	1.23863	0.04	1	0.964649
XLOC_013479	chr11	26789419	27114153	XLOC_013479	Zv9_00027545 Zv9_00027538 Zv9_00027541 Zv9_00027540 Zv9_00027542 Zv9_00027539 Zv9_00027543 Zv9_00027544	0.310086	0.503234	1.33452	0	0	6.19427	5.14165	7.70608	1.23977	0.04	1	0.964649
XLOC_025430	chr23	32053896	32068621	XLOC_025430	Zv9_00052143	0.0411842	0.00440609	0.0176157	0.378858	0.805941	12.7666	9.66573	9.13421	1.24287	0.04	1	0.964649
XLOC_009291	chr7	52674093	52704807	XLOC_009291	Zv9_00018909	46.6698	36.6042	53.1701	21.4375	14.5112	7.19033	7.09319	11.5519	1.24571	0.04	1	0.964649
XLOC_011031	chr9	35967532	35981823	XLOC_011031	Zv9_00022403	0.0531113	0.0424951	0.0408564	0.0364312	0.146433	9.99302	7.66382	6.90264	1.24739	0.04	1	0.964649
XLOC_008959	chr7	21132151	21156753	XLOC_008959	Zv9_00018236 Zv9_00018237 Zv9_00018239 Zv9_00018235 Zv9_00018238 Zv9_00018240 Zv9_00018234	27.5698	18.4481	0	21.0602	5.678	7.46198	5.67643	3.85824	1.24755	0.04	1	0.964649
XLOC_022222	chr20	27733656	27749958	XLOC_022222	Zv9_00045657 Zv9_00045658	13.4738	18.5541	1.45106	1.12446	2.40277	3.02546	3.16146	4.57934	1.24803	0.04	1	0.964649
XLOC_017933	chr16	25642785	25644642	XLOC_017933	Zv9_00036876	0	0	0	0	1.1595	44.9983	36.3828	50.4998	1.25443	0.04	1	0.964649
XLOC_003073	chr3	42654926	42669464	XLOC_003073	Zv9_00006319 Zv9_00006320	57.8153	27.7417	45.633	30.8276	12.8	11.0877	8.95357	8.17794	1.25445	0.04	1	0.964649
XLOC_002075	chr2	17271379	17338284	XLOC_002075	Zv9_00004296 Zv9_00004295	52.7151	61.5576	12.765	11.7373	11.2318	8.41558	8.63605	9.9131	1.26424	0.04	1	0.964649
XLOC_026735	chr24	25844155	25855571	XLOC_026735	Zv9_00054924 Zv9_00054923 Zv9_00054926 Zv9_00054925	0	0	0	0	5.86289	16.9979	9.61141	13.6238	1.27066	0.04	1	0.964649
XLOC_003107	chr3	47719333	47735274	XLOC_003107	Zv9_00006381 Zv9_00006380	0.0333176	0.0339506	0.0720735	0.242105	0.147675	6.18969	7.25513	0.467801	1.28261	0.04	1	0.964649
XLOC_022160	chr20	23643095	23643294	XLOC_022160	Zv9_00045524	0	0	0	0	0	2.50036	2.56252	0	1.3074	0.04	1	0.964649
XLOC_015782	chr14	249258	255258	XLOC_015782	Zv9_00032390	0	0	0	0	0	15.7689	15.9998	0	1.30896	0.04	1	0.964649
XLOC_014562	chr12	32097716	32113219	XLOC_014562	Zv9_00029833 Zv9_00029834	93.2541	7.52598	8.76748	6.49769	10.3369	7.22767	6.87576	2.68865	1.10937	0.05	1	0.981033
XLOC_007001	chr6	9551291	9586235	XLOC_007001	Zv9_00014184 Zv9_00014182 Zv9_00014180 Zv9_00014183 Zv9_00014181 Zv9_00014185 Zv9_00014179	57.6909	0	1.35215	3.92731	2.11645	4.4765	3.87141	3.98167	1.11057	0.05	1	0.981033
XLOC_020272	chr18	26773261	26796088	XLOC_020272	Zv9_00041703	0.242411	0.188914	0.0686299	0.888027	0.391916	0.127053	0.0827034	11.4308	1.11096	0.05	1	0.981033
XLOC_010864	chr9	21517165	21535179	XLOC_010864	Zv9_00022033 Zv9_00022034	4.00484	3.66559	5.8094	3.82878	18.9518	2.82254	2.51286	4.38966	1.11121	0.05	1	0.981033
XLOC_002116	chr2	22338183	22385665	XLOC_002116	Zv9_00004369	0.0258082	0.016276	0.0749335	0.115118	0.0844967	0.0686932	0.0502617	4.43736	1.11397	0.05	1	0.981033
XLOC_000089	chr1	8229236	8238988	XLOC_000089	Zv9_00000203	751.384	182.827	117.503	157.234	143.948	97.1348	69.0395	13.9928	1.11554	0.05	1	0.981033
XLOC_003499	chr3	19363206	19371863	XLOC_003499	Zv9_00007162 Zv9_00007163	0	0	0.226149	0.0807728	0.387898	0.467081	0.215392	3.4257	1.11575	0.05	1	0.981033
XLOC_008859	chr7	8229741	8248234	XLOC_008859	Zv9_00018031	0	0	0.0515804	1.52712	56.0422	0.32376	2.09154	7.7099	1.11743	0.05	1	0.981033
XLOC_018415	chr16	13802311	13810890	XLOC_018415	Zv9_00037843 Zv9_00037844	861.518	191.16	172.024	273.67	173.368	145.608	126.876	25.9494	1.12319	0.05	1	0.981033
XLOC_025215	chr23	10282322	10282600	XLOC_025215	Zv9_00051665	0	0	0	1.53561	0	0	0	7.54441	1.12918	0.05	1	0.981033
XLOC_017185	chr15	46325299	46325569	XLOC_017185	Zv9_00035277	8.65738	7.9683	11.3203	16.5477	5.74102	6.71427	7.48568	50.3297	1.13553	0.05	1	0.981033
XLOC_004795	chr4	7494131	7627342	XLOC_004795	Zv9_00009523 Zv9_00009522 Zv9_00009521	0.0770586	0.116752	0.675913	0	40.1613	9.15984	11.5257	11.8626	1.13574	0.05	1	0.981033
XLOC_024632	chr22	41282318	41291911	XLOC_024632	Zv9_00050451 Zv9_00050452	0.199422	0.521761	0.78568	1.24285	12.5271	3.44864	2.99982	3.17833	1.13637	0.05	1	0.981033
XLOC_026148	chr24	8642740	8657972	XLOC_026148	Zv9_00053700 Zv9_00053699 Zv9_00053701	4.1691	15.8617	3.45711	0.58505	0.0373417	0.0638472	0.0668108	0.227807	1.14659	0.05	1	0.981033
XLOC_019746	chr17	27031888	27077716	XLOC_019746	Zv9_00040631 Zv9_00040629 Zv9_00040630	9.693	28.5171	5.55675	2.07264	3.7373	3.19832	5.05529	7.1358	1.14675	0.05	1	0.981033
XLOC_007963	chr6	53302058	53321363	XLOC_007963	Zv9_00016195 Zv9_00016193 Zv9_00016194	0.726548	0.345933	4.62227	5.54575	4.1179	5.10842	5.31719	19.5366	1.14814	0.05	1	0.981033
XLOC_014696	chr12	49835823	49847741	XLOC_014696	Zv9_00030117 Zv9_00030118	0.0247522	0.0412393	0.0566367	0.136361	0.233751	2.95729	9.38334	2.38727	1.15027	0.05	1	0.981033
XLOC_017015	chr15	28373899	28421458	XLOC_017015	Zv9_00034926 Zv9_00034927 Zv9_00034928	25.9168	87.7829	22.9783	6.1426	1.1934	1.3805	0.999506	4.7636	1.15127	0.05	1	0.981033
XLOC_003465	chr3	15684866	15688601	XLOC_003465	Zv9_00007087 Zv9_00007086	0	0	1.93151	8.24022	6.71064	7.93169	13.6947	46.2687	1.15254	0.05	1	0.981033
XLOC_002354	chr2	44811180	44839142	XLOC_002354	Zv9_00004895 Zv9_00004896 Zv9_00004894	569.032	187.675	240.765	163.357	138.1	78.442	56.3099	13.184	1.15351	0.05	1	0.981033
XLOC_001300	chr2	7344253	7353003	XLOC_001300	Zv9_00002773	0	0	0.122224	0.0888927	2.32987	329.987	977.43	214.155	1.15579	0.05	1	0.981033
XLOC_015960	chr14	18964772	18970902	XLOC_015960	Zv9_00032740	0.00587815	0.0103315	0.00366192	0.00676055	0.0724021	1.02972	3.30036	1.31945	1.15636	0.05	1	0.981033
XLOC_002192	chr2	29765379	29770213	XLOC_002192	Zv9_00004511	0	0	0.0185324	0.406708	16.7461	5.5503	6.68207	5.43786	1.16179	0.05	1	0.981033
XLOC_025161	chr23	4744150	4746961	XLOC_025161	Zv9_00051560	0	0	0	0.0337011	0.279095	3.26031	8.21728	1.25492	1.16257	0.05	1	0.981033
XLOC_010556	chr8	46921975	46927851	XLOC_010556	Zv9_00021395	9.1181	21.1253	3.61825	2.23519	3.14921	5.87562	8.51932	6.37077	1.16395	0.05	1	0.981033
XLOC_003520	chr3	21186421	21333850	XLOC_003520	Zv9_00007223 Zv9_00007222	6.44439	32.4533	15.9431	7.06859	3.55584	3.36141	5.38858	6.36883	1.16747	0.05	1	0.981033
XLOC_025030	chr22	37797548	37818647	XLOC_025030	Zv9_00051277 Zv9_00051276 Zv9_00051275	207.114	82.3436	61.1085	47.6192	38.1267	25.7828	20.7552	6.59949	1.16831	0.05	1	0.981033
XLOC_026396	chr24	36634899	36658748	XLOC_026396	Zv9_00054216	0	0	0.00724639	0.146956	0.0834404	4.58191	13.1279	5.34334	1.1698	0.05	1	0.981033
XLOC_006257	chr5	21168835	21183492	XLOC_006257	Zv9_00012465 Zv9_00012466	0.0243874	0.0389905	0.0187753	0.0498454	0.245967	11.1876	26.8676	4.85011	1.17105	0.05	1	0.981033
XLOC_020030	chr18	2972203	2999807	XLOC_020030	Zv9_00041220 Zv9_00041219	8.86038	19.2274	5.78607	0.244383	0.308642	0	0	0.489768	1.17339	0.05	1	0.981033
XLOC_013036	chr11	31604476	31618428	XLOC_013036	Zv9_00026592	0	0	0	0.00749547	0.149779	12.8632	31.5466	8.87652	1.17391	0.05	1	0.981033
XLOC_024841	chr22	12965573	13001764	XLOC_024841	Zv9_00050866 Zv9_00050869 Zv9_00050865 Zv9_00050867 Zv9_00050868	0	0	0.635318	1.03943	2.05408	5.42364	0	0	1.17583	0.05	1	0.981033
XLOC_001468	chr2	24095320	24119019	XLOC_001468	Zv9_00003101 Zv9_00003099 Zv9_00003100	0	0	0.013816	0.108867	0.373022	8.26107	2.91163	3.94373	1.17697	0.05	1	0.981033
XLOC_013163	chr11	44714885	44716852	XLOC_013163	Zv9_00026823	0	0	0	0	0.765868	2.60635	7.57782	3.75924	1.17809	0.05	1	0.981033
XLOC_022142	chr20	22293185	22352203	XLOC_022142	Zv9_00045488	0.184497	0.229071	0.140717	0.177292	6.99962	2.88463	2.07544	2.54214	1.18115	0.05	1	0.981033
XLOC_014995	chr13	25652575	25660605	XLOC_014995	Zv9_00030772	0	0	0.0344809	0.34715	8.19044	7.9484	11.8583	16.6597	1.1813	0.05	1	0.981033
XLOC_003896	chr3	56006274	56065850	XLOC_003896	Zv9_00007973 Zv9_00007972	0.032486	0.0697365	0.0508894	0.499738	4.63384	4.2034	5.49448	6.82681	1.18212	0.05	1	0.981033
XLOC_026185	chr24	14141990	14349083	XLOC_026185	Zv9_00053788 Zv9_00053787 Zv9_00053792 Zv9_00053790 Zv9_00053789 Zv9_00053786 Zv9_00053791 Zv9_00053785	11.9225	0	25.6249	9.3686	0	0	0	0	1.18251	0.05	1	0.981033
XLOC_007147	chr6	26770722	26796906	XLOC_007147	Zv9_00014465 Zv9_00014464 Zv9_00014463	0.192194	0.293761	0.138525	1.30854	2.91403	4.70861	4.29422	8.44723	1.18448	0.05	1	0.981033
XLOC_023049	chr20	53578165	53584015	XLOC_023049	Zv9_00047325	0	0	0.100172	0.444826	9.94516	4.22112	3.36016	4.07274	1.18599	0.05	1	0.981033
XLOC_001850	chr2	57705660	57707465	XLOC_001850	Zv9_00003846	0	0	0	0	0.636006	3.88105	13.1787	7.00183	1.1867	0.05	1	0.981033
XLOC_028829	Zv9_NA739	9771	12076	XLOC_028829	Zv9_00058573	5.72948	22.5951	12.3785	5.27231	0.204591	0	0	0	1.18686	0.05	1	0.981033
XLOC_017427	chr15	22720727	22730085	XLOC_017427	Zv9_00035829	0	0	0	0	0.0183245	1.11559	5.2787	2.95957	1.18792	0.05	1	0.981033
XLOC_015365	chr13	8805682	8808890	XLOC_015365	Zv9_00031465	12.9312	4.72937	6.60286	3.67906	0.0338602	0.161619	0.167175	0.876955	1.18867	0.05	1	0.981033
XLOC_011822	chr10	6234948	6239172	XLOC_011822	Zv9_00024029	15.5343	12.257	23.3048	33.4198	33.6803	117.06	98.1352	113.879	1.1899	0.05	1	0.981033
XLOC_020924	chr19	477519	485494	XLOC_020924	Zv9_00042991 Zv9_00042990	6.51076	1.10493	0.424961	0.132722	2.79412	1.48705	1.41118	1.61045	1.1902	0.05	1	0.981033
XLOC_006595	chr5	50768530	50778883	XLOC_006595	Zv9_00013297 Zv9_00013298	0.109911	0.0433635	1.75633	5.82832	9.46198	15.9418	14.7572	38.0726	1.19055	0.05	1	0.981033
XLOC_025330	chr23	22494619	22509795	XLOC_025330	Zv9_00051928	0.0730325	0.0014665	0.0093743	0.00822877	0.215844	17.8934	4.32937	8.49795	1.19201	0.05	1	0.981033
XLOC_005898	chr5	62281836	62378754	XLOC_005898	Zv9_00011696	4.68544	5.69782	3.82788	4.12701	26.9528	14.0405	14.0074	9.80102	1.19227	0.05	1	0.981033
XLOC_018225	chr16	52047599	52082908	XLOC_018225	Zv9_00037494 Zv9_00037493 Zv9_00037491 Zv9_00037492	8.27929	21.3297	10.8048	6.8141	2.69166	1.69802	1.98394	2.91156	1.1927	0.05	1	0.981033
XLOC_018543	chr16	26761885	26789108	XLOC_018543	Zv9_00038096	0.0597937	0.0820314	0.0131428	0.0468376	9.79074	12.068	12.2367	18.5273	1.19295	0.05	1	0.981033
XLOC_016637	chr14	45216820	45365942	XLOC_016637	Zv9_00034190	0.0136229	0.00642643	0.108941	0.439077	25.6444	7.84163	10.2229	15.9282	1.1959	0.05	1	0.981033
XLOC_021730	chr19	28766863	28769897	XLOC_021730	Zv9_00044675 Zv9_00044676	21.9078	13.6189	15.4024	67.0984	63.4936	111.319	115.867	137.159	1.19821	0.05	1	0.981033
XLOC_024699	chr22	2373345	2418541	XLOC_024699	Zv9_00050557 Zv9_00050558 Zv9_00050559 Zv9_00050560 Zv9_00050556	0.624828	0.440402	2.54398	2.68439	5.46482	9.26961	14.76	8.70576	1.20254	0.05	1	0.981033
XLOC_006995	chr6	9329391	9344315	XLOC_006995	Zv9_00014163 Zv9_00014161 Zv9_00014162	80.9888	62.5312	51.881	37.4405	34.3127	13.3661	10.6095	7.16368	1.20341	0.05	1	0.981033
XLOC_018079	chr16	35906430	35909812	XLOC_018079	Zv9_00037162	0	0	0.271924	2.45334	1.14697	38.6514	74.0145	17.7683	1.20538	0.05	1	0.981033
XLOC_026611	chr24	12530981	12591584	XLOC_026611	Zv9_00054654	2.06705	5.71763	8.52728	17.5414	1.19755	16.8061	19.8437	25.0829	1.20612	0.05	1	0.981033
XLOC_001772	chr2	50376133	50404987	XLOC_001772	Zv9_00003724 Zv9_00003720 Zv9_00003719 Zv9_00003721 Zv9_00003723 Zv9_00003722 Zv9_00003725	0	0	25.2717	14.8023	11.2841	8.42411	8.54657	6.70693	1.20635	0.05	1	0.981033
XLOC_027860	Zv9_NA119	1	3576	XLOC_027860	Zv9_00057276 Zv9_00057277	176.396	99.4162	82.7794	61.2735	55.8618	21.7324	19.0088	10.5082	1.20668	0.05	1	0.981033
XLOC_004874	chr4	13027045	13060319	XLOC_004874	Zv9_00009701 Zv9_00009702	1.00009	0.00524978	27.7496	12.919	24.9516	15.2	13.4768	11.2868	1.2067	0.05	1	0.981033
XLOC_027475	chr25	3866147	3886766	XLOC_027475	Zv9_00056519 Zv9_00056518	0.0440511	0.0105606	0.22872	0.871318	0.44494	11.6022	9.81405	11.1339	1.20701	0.05	1	0.981033
XLOC_007688	chr6	23155069	23177049	XLOC_007688	Zv9_00015621 Zv9_00015622	0.0681308	0.0220082	0.0447935	0.0142423	0.266788	28.539	21.2666	22.4555	1.20849	0.05	1	0.981033
XLOC_005424	chr5	13717620	13719915	XLOC_005424	Zv9_00010665	0	0	0.00431148	0.951861	6.26667	4.20267	9.01367	12.1359	1.2102	0.05	1	0.981033
XLOC_022532	chr20	55785165	55797386	XLOC_022532	Zv9_00046280	0.435145	0.161635	1.53711	22.8332	13.9168	15.7648	11.9068	18.9522	1.21178	0.05	1	0.981033
XLOC_018034	chr16	31816104	31843552	XLOC_018034	Zv9_00037081 Zv9_00037082 Zv9_00037080	0.347409	1.04571	2.13211	2.93352	3.79267	11.3102	9.23656	9.6245	1.21185	0.05	1	0.981033
XLOC_027247	chr25	24500801	24540753	XLOC_027247	Zv9_00056031 Zv9_00056030 Zv9_00056029	3.10128	10.5732	21.1871	16.1238	47.2384	112.817	99.942	149.421	1.21294	0.05	1	0.981033
XLOC_028418	Zv9_NA832	8682	10130	XLOC_028418	Zv9_00058080	59.0056	26.4848	29.6903	54.8783	2.23129	4.56406	12.8179	72.5617	1.21329	0.05	1	0.981033
XLOC_020793	chr18	38783465	38806213	XLOC_020793	Zv9_00042747	0.21009	0.062098	0.155422	0.531062	2.89319	4.31624	4.42638	7.01712	1.21467	0.05	1	0.981033
XLOC_000244	chr1	25633445	25637275	XLOC_000244	Zv9_00000525 Zv9_00000527 Zv9_00000526	0.310761	0.0621929	1.4314	3.12356	0.591248	16.6109	32.8428	11.4373	1.21486	0.05	1	0.981033
XLOC_015631	chr13	37094673	37105054	XLOC_015631	Zv9_00032059	0.145955	0.0829904	0.764937	3.36575	2.6216	16.6308	10.3565	6.12677	1.21541	0.05	1	0.981033
XLOC_001787	chr2	51884190	51923391	XLOC_001787	Zv9_00003756 Zv9_00003759 Zv9_00003755	235.726	203.678	119.862	205.573	9.7619	0.897071	1.32399	0	1.21594	0.05	1	0.981033
XLOC_027678	chr25	24248136	24249419	XLOC_027678	Zv9_00056920	0.936548	0.291003	0.671932	1.352	1.94678	25.6385	20.3834	24.0855	1.2171	0.05	1	0.981033
XLOC_011368	chr9	14089317	14239310	XLOC_011368	Zv9_00023077 Zv9_00023074 Zv9_00023072 Zv9_00023078 Zv9_00023075 Zv9_00023073 Zv9_00023070 Zv9_00023076 Zv9_00023071	15.3877	11.398	5.49752	2.35165	5.91471	0	0	0	1.21766	0.05	1	0.981033
XLOC_009902	chr8	37379022	37451862	XLOC_009902	Zv9_00020078 Zv9_00020079	9.89346	5.13729	11.3107	4.0254	2.01722	1.83919	1.62222	2.16425	1.21934	0.05	1	0.981033
XLOC_011370	chr9	14366174	14385138	XLOC_011370	Zv9_00023081 Zv9_00023080	0.0105886	0.0305179	0.00814076	0.293917	0.394973	9.36779	7.31489	7.49967	1.22129	0.05	1	0.981033
XLOC_018736	chr16	44140133	44258035	XLOC_018736	Zv9_00038551 Zv9_00038545 Zv9_00038549 Zv9_00038543 Zv9_00038546 Zv9_00038547 Zv9_00038542 Zv9_00038548 Zv9_00038544	76.2228	45.7197	0	120.79	35.9789	7.64616	7.22842	7.13983	1.2216	0.05	1	0.981033
XLOC_006663	chr5	59070553	59073058	XLOC_006663	Zv9_00013471	3.43288	6.12563	1.97737	0.584475	0.0590852	0.0581172	0.0913215	0.377192	1.22235	0.05	1	0.981033
XLOC_015290	chr13	723854	728601	XLOC_015290	Zv9_00031336	30.7859	8.47777	10.4407	17.1561	1.74496	8.40414	10.5903	30.7241	1.22452	0.05	1	0.981033
XLOC_006587	chr5	49511445	49529405	XLOC_006587	Zv9_00013277 Zv9_00013279 Zv9_00013278	143.969	73.8349	101.605	40.9268	3.84186	12.8941	10.4416	22.3996	1.22545	0.05	1	0.981033
XLOC_027966	Zv9_NA905	7242	13918	XLOC_027966	Zv9_00057456	15.1219	4.57018	6.21497	7.57785	0.307558	1.51134	1.67059	11.7857	1.22755	0.05	1	0.981033
XLOC_002964	chr3	33437480	33438282	XLOC_002964	Zv9_00006099	0	0	0	0.0346394	0.916434	62.6478	33.8776	27.0622	1.22877	0.05	1	0.981033
XLOC_002454	chr2	56044716	56074503	XLOC_002454	Zv9_00005089	0.0267433	0.173828	0	0	0.0474177	5.06388	3.59026	3.33071	1.23171	0.05	1	0.981033
XLOC_014997	chr13	25708632	25723107	XLOC_014997	Zv9_00030778 Zv9_00030776 Zv9_00030777	0.567508	1.23659	1.04853	2.12142	0	14.7225	9.31746	4.77072	1.2326	0.05	1	0.981033
XLOC_017187	chr15	46428140	46437374	XLOC_017187	Zv9_00035281	0.0668284	0.0285803	0.0593347	0.399923	9.78092	3.1916	6.22858	5.74507	1.23616	0.05	1	0.981033
XLOC_017868	chr16	17392734	17442975	XLOC_017868	Zv9_00036750 Zv9_00036749	34.2736	38.0054	8.15899	6.63713	7.81974	4.4208	3.31334	1.43224	1.23695	0.05	1	0.981033
XLOC_004212	chr4	15862542	15865671	XLOC_004212	Zv9_00008609	0.0430176	0.0891781	0.144091	0.229544	0.104806	1.11684	4.67677	3.13923	1.23779	0.05	1	0.981033
XLOC_010675	chr9	399173	423783	XLOC_010675	Zv9_00021655 Zv9_00021656	0	20.9384	31.4374	0	45.2497	11.9687	10.025	2.96885	1.23938	0.05	1	0.981033
XLOC_002228	chr2	32206949	32231452	XLOC_002228	Zv9_00004599 Zv9_00004601 Zv9_00004600	262.234	160.545	222.006	0	0	0	0	0	1.24084	0.05	1	0.981033
XLOC_015192	chr13	46144510	46192845	XLOC_015192	Zv9_00031163 Zv9_00031162 Zv9_00031160 Zv9_00031164 Zv9_00031161 Zv9_00031159	65.9713	53.813	64.583	14.4654	25.7974	14.0208	18.2007	13.6553	1.24128	0.05	1	0.981033
XLOC_019259	chr17	32566385	32570089	XLOC_019259	Zv9_00039631	6.01756	4.10428	1.12735	3.93707	0.133126	0.132665	0.740258	0.906229	1.24221	0.05	1	0.981033
XLOC_008271	chr7	25190570	25207163	XLOC_008271	Zv9_00016813 Zv9_00016814	32.9421	36.5819	11.8138	9.95914	15.2372	13.0087	8.89748	3.57083	1.24493	0.05	1	0.981033
XLOC_016594	chr14	37104955	37113141	XLOC_016594	Zv9_00034070	50.3126	34.0543	43.1141	18.2579	0.807244	0.0376541	0	0	1.2489	0.05	1	0.981033
XLOC_010912	chr9	24699087	24753095	XLOC_010912	Zv9_00022132	0	0	0.0178999	0.0395755	0.0961984	13.7307	8.84214	6.74617	1.24901	0.05	1	0.981033
XLOC_020314	chr18	33999315	33999613	XLOC_020314	Zv9_00041771	0.379598	0	26.19	7.79451	23.7805	1.46178	0.895294	0	1.24914	0.05	1	0.981033
XLOC_014958	chr13	23003644	23013553	XLOC_014958	Zv9_00030707 Zv9_00030710 Zv9_00030708 Zv9_00030706 Zv9_00030709	0	0	0.592067	0.622391	1.36572	5.6457	4.97495	6.77075	1.25198	0.05	1	0.981033
XLOC_006784	chr5	70729261	70747825	XLOC_006784	Zv9_00013706 Zv9_00013705	0.418758	0.735395	0.887097	4.58732	13.6859	6.32417	6.8845	9.63124	1.25299	0.05	1	0.981033
XLOC_005997	chr5	70387013	70436479	XLOC_005997	Zv9_00011918 Zv9_00011922 Zv9_00011919 Zv9_00011921 Zv9_00011920 Zv9_00011923 Zv9_00011924	0.210977	0.0616945	0	0.0147808	6.02246	36.2823	46.4291	3.70722	1.25389	0.05	1	0.981033
XLOC_027983	Zv9_NA915	24590	67965	XLOC_027983	Zv9_00057488 Zv9_00057487 Zv9_00057486	17.5393	25.9889	12.4352	5.56711	8.543	4.33627	4.28443	5.45336	1.25414	0.05	1	0.981033
XLOC_009762	chr8	24208339	24234445	XLOC_009762	Zv9_00019815 Zv9_00019808 Zv9_00019809 Zv9_00019816 Zv9_00019810 Zv9_00019812 Zv9_00019811 Zv9_00019807 Zv9_00019813 Zv9_00019814	34.3743	14.3348	39.881	0	0	0	0	0	1.25488	0.05	1	0.981033
XLOC_021137	chr19	19195311	19197190	XLOC_021137	Zv9_00043411	0.0544277	0	0	0	0.0711355	3.37195	2.36832	1.92527	1.259	0.05	1	0.981033
XLOC_026326	chr24	27893578	28096923	XLOC_026326	Zv9_00054078 Zv9_00054082 Zv9_00054080 Zv9_00054079 Zv9_00054081 Zv9_00054083	1.02693	0.94106	2.09242	0	2.20335	7.12555	6.26393	8.49076	1.25906	0.05	1	0.981033
XLOC_000232	chr1	24954420	24980605	XLOC_000232	Zv9_00000491	0.406092	0.169824	0.919675	0.58128	1.34806	6.468	5.01217	4.84151	1.26209	0.05	1	0.981033
XLOC_028720	Zv9_NA186	2996	20119	XLOC_028720	Zv9_00058407	12.0619	15.0743	13.5847	3.6233	4.70323	2.77281	2.08397	1.50153	1.26384	0.05	1	0.981033
XLOC_001953	chr2	4408280	4430220	XLOC_001953	Zv9_00004033 Zv9_00004032 Zv9_00004035 Zv9_00004034	0	53.1745	49.131	24.3087	0	0	0	0	1.26729	0.05	1	0.981033
XLOC_000164	chr1	16335278	16336933	XLOC_000164	Zv9_00000355	0	0	0	0	0.43143	14.334	20.2712	3.63616	1.26814	0.05	1	0.981033
XLOC_023660	chr21	1940740	1949022	XLOC_023660	Zv9_00048511	0.633392	0.453657	0.189057	0.233801	0.737217	13.9279	11.6583	12.9053	1.27226	0.05	1	0.981033
XLOC_001130	chr1	56574371	56661474	XLOC_001130	Zv9_00002440 Zv9_00002438 Zv9_00002441 Zv9_00002439	0.0393028	0.0382372	0.0358198	0.0184582	0.375263	21.7136	18.3391	24.8946	1.27958	0.05	1	0.981033
XLOC_009118	chr7	32765194	32775944	XLOC_009118	Zv9_00018524 Zv9_00018523	0.189432	0.0723928	0.212199	0.013727	0.174449	22.0052	19.8383	18.0838	1.29428	0.05	1	0.981033
XLOC_016749	chr15	1195809	1218695	XLOC_016749	Zv9_00034442 Zv9_00034441 Zv9_00034443 Zv9_00034440	29.5079	6.93962	5.83308	6.8902	5.6287	10.0196	11.2546	24.381	1.29522	0.05	1	0.981033
XLOC_017526	chr15	31880109	31885473	XLOC_017526	Zv9_00036042	0	0	0	0.0253645	0.362491	72.0681	66.1713	64.3372	1.29709	0.05	1	0.981033
