# Supplementary material for: Time Series Expression Analyses Using RNA-seq: A Statistical Approach
Source: Biomed Res Int. 2013 Mar 24;2013:203681. doi: 10.1155/2013/203681 (PMC3622290; doi:10.1155/2013/203681)
Supplement: Supplementary file 1 — Supplementary Table 1: Temporally differentially expressed gene sets detected by statistical evolutionary trajectory index (SETI) where the Benjamini-Hochberg FDR is controlled at < 0.05 in maize data Supplementary Table 2: Temporally differentially expressed gene sets detected by statistical evolutionary trajectory index (SETI) where the Benjamini-Hochberg FDR is controlled at < 0.05 in zebrafish data Supplementary Table 3: Temporally differentially expressed gene sets detected by Poisson AR(1) model in maize data Supplementary Table 4: Temporally differentially expressed gene sets detected by Poisson AR(1) model in zebrafish data [file 203681.f1.zip › SUPPLEMENTARY-DATA-JBB/SUPPLE-TABLE-3.xlsx]

## Sheet: rnaseq_ar1_maize_summary_of_sta
geneID	base	time-1cm	time-4cm	tip		node	mean	sd	MC error	0.025	median	0.975	start	sample		node	mean	sd	MC error	0.025	median	0.975	start	sample		node	mean	sd	MC error	0.025	median	0.975	start	sample
GRMZM5G804976	17	90	28	53		beta.i[18513]	-3.503e-05	0.03156	0.0006962	-0.06167	0.0009651	0.05903	5001	2000		pi.1[18513]	0.5644	0.2417	0.00475	1.135e-05	0.6074	0.8941	5001	2000
GRMZM2G125495	33	17	88	103		beta.i[11603]	0.0004531	0.03025	0.0005332	-0.05716	0.001015	0.05945	5001	2000		pi.1[11603]	0.527	0.2291	0.004188	2.789e-05	0.5671	0.8674	5001	2000
GRMZM2G063253	42	32	94	132		beta.i[29032]	0.0019	0.03286	0.0008053	-0.05983	0.0009857	0.06953	5001	2000		pi.1[29032]	0.5396	0.2213	0.00508	6.379e-05	0.5792	0.8594	5001	2000
AC211327.4_FG006	104	23	115	126		beta.i[23629]	0.00194	0.03091	0.0006575	-0.05648	0.001044	0.06614	5001	2000		pi.1[23629]	0.4867	0.2128	0.003988	7.525e-05	0.5157	0.8097	5001	2000
GRMZM2G060817	14	19	125	43		beta.i[28998]	0.0002571	0.03179	0.0007324	-0.06302	0.0002526	0.06035	5001	2000		pi.1[28998]	0.5749	0.2406	0.004157	9.823e-05	0.617	0.9084	5001	2000
GRMZM5G854499	10	13	99	120		beta.i[31559]	0.002161	0.03208	0.0006922	-0.05944	0.001239	0.06467	5001	2000		pi.1[31559]	0.6177	0.2425	0.005623	0.0001262	0.6716	0.9272	5001	2000
GRMZM5G868202	4	2	290	250		beta.i[28031]	0.0006761	0.0314	0.0007872	-0.06448	0.0003125	0.06233	5001	2000		pi.1[28031]	0.6655	0.2677	0.005291	0.0001489	0.737	0.9796	5001	2000
GRMZM2G085049	7	18	41	118		beta.i[24858]	0.001603	0.03086	0.0008222	-0.0572	0.001258	0.06148	5001	2000		pi.1[24858]	0.6364	0.2559	0.005704	0.0001571	0.6996	0.947	5001	2000
GRMZM2G178356	5	3	244	221		beta.i[26262]	0.0006737	0.03246	0.0009013	-0.06534	0.00108	0.06309	5001	2000		pi.1[26262]	0.6576	0.2561	0.005561	0.0002179	0.7269	0.9644	5001	2000
GRMZM2G153648	62	88	73	26		beta.i[37233]	0.001906	0.03106	0.0008235	-0.05825	0.001215	0.0623	5001	2000		pi.1[37233]	0.4973	0.2189	0.005119	0.0003264	0.5275	0.8354	5001	2000
GRMZM2G061629	24	17	66	114		beta.i[15664]	0.000866	0.03075	0.0006732	-0.05906	0.0004227	0.06152	5001	2000		pi.1[15664]	0.5472	0.2349	0.004032	0.0003604	0.5952	0.8748	5001	2000
GRMZM2G363229	169	33	77	99		beta.i[7307]	0.0004211	0.0321	0.0007442	-0.06191	-0.000143	0.06436	5001	2000		pi.1[7307]	0.4542	0.2083	0.005582	0.0004162	0.476	0.7867	5001	2000
GRMZM5G811732	43	60	34	95		beta.i[34795]	0.002662	0.03202	0.0007283	-0.06021	0.002636	0.06593	5001	2000		pi.1[34795]	0.5217	0.2241	0.005716	0.0004283	0.5599	0.8513	5001	2000
GRMZM2G057184	50	28	83	115		beta.i[24472]	0.001848	0.03118	0.0007688	-0.0617	0.002954	0.06177	5001	2000		pi.1[24472]	0.511	0.2212	0.005218	0.0004631	0.549	0.8448	5001	2000
GRMZM2G029537	28	29	62	64		beta.i[15210]	0.001583	0.0312	0.0005888	-0.06001	0.001629	0.06167	5001	2000		pi.1[15210]	0.5274	0.2317	0.005987	0.0004949	0.5667	0.864	5001	2000
GRMZM2G047647	65	5	421	459		beta.i[15466]	0.002002	0.03141	0.0007134	-0.06277	0.002554	0.06214	5001	2000		pi.1[15466]	0.5047	0.2121	0.00482	0.0004996	0.5327	0.8295	5001	2000
GRMZM2G176446	2	8	72	157		beta.i[17116]	0.001454	0.03118	0.0006606	-0.0581	0.001292	0.06249	5001	2000		pi.1[17116]	0.7201	0.2662	0.007693	0.000511	0.7968	0.9932	5001	2000
GRMZM2G145473	43	25	79	90		beta.i[25793]	0.0004094	0.03138	0.0005954	-0.06252	0.001153	0.0613	5001	2000		pi.1[25793]	0.5129	0.2181	0.005639	0.0005482	0.5532	0.8412	5001	2000
TUBB1	2	12	68	82		beta.i[6523]	-3.439e-05	0.03176	0.0007377	-0.06099	-0.0006151	0.06361	5001	2000		pi.1[6523]	0.7028	0.2761	0.007468	0.0005744	0.7836	0.9926	5001	2000
GRMZM5G885552	5	8	121	126		beta.i[18947]	0.002873	0.03208	0.0007896	-0.05588	0.002556	0.06616	5001	2000		pi.1[18947]	0.6569	0.2598	0.005883	0.0005967	0.7191	0.97	5001	2000
GRMZM2G044175	4	46	35	70		beta.i[10401]	0.001657	0.03115	0.0007105	-0.05749	0.001532	0.06275	5001	2000		pi.1[10401]	0.6536	0.27	0.00592	0.0006169	0.72	0.976	5001	2000
GRMZM2G128564	90	27	57	106		beta.i[5844]	0.002119	0.03243	0.0007758	-0.05984	0.00121	0.06731	5001	2000		pi.1[5844]	0.4734	0.2125	0.00477	0.0006218	0.5032	0.8174	5001	2000
AC149828.2_FG002	30	16	87	122		beta.i[39104]	0.001013	0.03163	0.0006517	-0.05897	0.000512	0.06393	5001	2000		pi.1[39104]	0.5369	0.2337	0.005351	0.0006857	0.5788	0.8694	5001	2000
GRMZM2G169927	12	145	43	17		beta.i[21548]	0.00206	0.03156	0.0004909	-0.05872	0.001384	0.06596	5001	2000		pi.1[21548]	0.5631	0.245	0.005267	0.0007604	0.6103	0.9057	5001	2000
GRMZM2G114325	23	15	66	157		beta.i[1139]	0.001097	0.03159	0.0007026	-0.06072	0.001467	0.06114	5001	2000		pi.1[1139]	0.5595	0.2356	0.005887	0.0007715	0.5995	0.8865	5001	2000
GRMZM2G401848	26	13	279	77		beta.i[7563]	0.00085	0.03179	0.0007519	-0.06	0.0002847	0.06213	5001	2000		pi.1[7563]	0.5398	0.229	0.005249	0.0008621	0.5758	0.8689	5001	2000
GRMZM2G009894	28	64	50	41		beta.i[35550]	0.0007733	0.03138	0.0006118	-0.05984	0.0009919	0.06428	5001	2000		pi.1[35550]	0.5251	0.2311	0.00479	0.0008658	0.5676	0.8652	5001	2000
GRMZM2G051787	270	90	72	60		beta.i[19948]	0.00238	0.03083	0.0006763	-0.06013	0.002485	0.06428	5001	2000		pi.1[19948]	0.4487	0.1969	0.004427	0.0008854	0.4753	0.7673	5001	2000
GRMZM2G528575	39	17	132	149		beta.i[38455]	0.001223	0.03143	0.0007292	-0.0589	0.001443	0.06396	5001	2000		pi.1[38455]	0.5362	0.2254	0.005231	0.000903	0.5754	0.8521	5001	2000
GRMZM2G020926	15	26	54	70		beta.i[19581]	0.000488	0.03263	0.0006995	-0.06217	0.0005464	0.06194	5001	2000		pi.1[19581]	0.5736	0.2381	0.005962	0.0009303	0.6205	0.8967	5001	2000
GRMZM2G432615	22	40	45	68		beta.i[30854]	0.001589	0.03172	0.0007136	-0.05912	0.001545	0.06511	5001	2000		pi.1[30854]	0.551	0.239	0.005154	0.0009466	0.5943	0.8873	5001	2000
GRMZM2G105909	16	24	81	91		beta.i[40307]	0.0007269	0.03247	0.0006814	-0.06155	0.001132	0.06653	5001	2000		pi.1[40307]	0.582	0.2346	0.005427	0.0009513	0.6278	0.9021	5001	2000
GRMZM2G105652	11	33	52	92		beta.i[11336]	0.001722	0.03111	0.0006895	-0.05763	0.001215	0.06354	5001	2000		pi.1[11336]	0.6002	0.2451	0.004998	0.00101	0.6549	0.917	5001	2000
GRMZM2G021729	147	18	214	120		beta.i[35685]	0.001818	0.03054	0.0007926	-0.05791	0.001991	0.06223	5001	2000		pi.1[35685]	0.4582	0.2074	0.004533	0.001038	0.4737	0.788	5001	2000
GRMZM2G465430	58	14	151	158		beta.i[27211]	0.00155	0.03116	0.000637	-0.05956	0.0017	0.06473	5001	2000		pi.1[27211]	0.5098	0.2193	0.004776	0.001085	0.5426	0.8386	5001	2000
GRMZM2G099648	20	8	156	272		beta.i[40235]	0.0005677	0.03161	0.0007262	-0.06307	0.000693	0.06157	5001	2000		pi.1[40235]	0.5675	0.2374	0.006723	0.001092	0.6132	0.8873	5001	2000
GRMZM2G342738	4	12	110	101		beta.i[41199]	0.000133	0.03109	0.0005716	-0.06018	-4.987e-05	0.06338	5001	2000		pi.1[41199]	0.6805	0.2612	0.008235	0.001092	0.7513	0.9757	5001	2000
GRMZM2G041404	5	5	137	220		beta.i[4136]	0.00128	0.03153	0.0007147	-0.05864	0.0007497	0.06336	5001	2000		pi.1[4136]	0.6746	0.2526	0.006563	0.001093	0.7384	0.9699	5001	2000
AC152495.1_FG017	8	21	73	105		beta.i[8]	0.0006409	0.03149	0.0006114	-0.05965	3.609e-05	0.06448	5001	2000		pi.1[8]	0.6281	0.2407	0.005526	0.001183	0.6821	0.9357	5001	2000
GRMZM2G082180	62	40	72	93		beta.i[20368]	0.001251	0.03186	0.0005752	-0.05809	0.0005803	0.06205	5001	2000		pi.1[20368]	0.5139	0.2122	0.005141	0.001238	0.5426	0.8288	5001	2000
GRMZM2G379179	41	40	81	56		beta.i[7403]	0.001964	0.03258	0.0006553	-0.06303	0.003085	0.06312	5001	2000		pi.1[7403]	0.5179	0.2281	0.004507	0.001302	0.555	0.8467	5001	2000
GRMZM5G877929	145	63	71	94		beta.i[9204]	0.001324	0.03204	0.0006922	-0.06164	0.001832	0.06611	5001	2000		pi.1[9204]	0.4728	0.2023	0.004314	0.001391	0.5016	0.7942	5001	2000
GRMZM2G147256	19	48	37	105		beta.i[11908]	0.001479	0.03177	0.0008434	-0.0597	0.00212	0.0637	5001	2000		pi.1[11908]	0.561	0.2327	0.005352	0.001426	0.6023	0.8847	5001	2000
AC218148.2_FG008	3	15	103	61		beta.i[28388]	0.001351	0.03183	0.0005651	-0.06353	0.001799	0.06305	5001	2000		pi.1[28388]	0.6929	0.2606	0.00673	0.001431	0.765	0.9882	5001	2000
GRMZM2G316635	17	25	83	103		beta.i[17286]	0.000468	0.03237	0.0007096	-0.06208	-0.0002913	0.066	5001	2000		pi.1[17286]	0.5902	0.2316	0.005607	0.001455	0.6402	0.901	5001	2000
GRMZM2G442458	28	18	80	88		beta.i[2230]	0.001911	0.03258	0.0006954	-0.06528	0.002172	0.06692	5001	2000		pi.1[2230]	0.5464	0.2276	0.004877	0.001458	0.5884	0.8714	5001	2000
GRMZM2G130773	18	31	63	78		beta.i[11670]	0.00123	0.03203	0.0006569	-0.06202	-0.0002838	0.06596	5001	2000		pi.1[11670]	0.5702	0.24	0.004637	0.001523	0.618	0.8958	5001	2000
GRMZM2G146000	35	36	76	72		beta.i[6156]	0.001208	0.03221	0.0008359	-0.06025	0.001142	0.06443	5001	2000		pi.1[6156]	0.5337	0.2259	0.004609	0.001574	0.5744	0.86	5001	2000
GRMZM2G027571	39	51	75	24		beta.i[10136]	0.002718	0.03134	0.0007019	-0.06064	0.003092	0.06468	5001	2000		pi.1[10136]	0.5121	0.2234	0.004682	0.0016	0.5448	0.8449	5001	2000
GRMZM5G854813	18	18	96	71		beta.i[23192]	0.00205	0.0316	0.0006824	-0.05634	0.001521	0.06258	5001	2000		pi.1[23192]	0.5564	0.2411	0.004908	0.001634	0.5992	0.8914	5001	2000
GRMZM2G048305	32	31	58	70		beta.i[15476]	0.001301	0.03224	0.0006892	-0.0623	0.002076	0.06453	5001	2000		pi.1[15476]	0.5399	0.2271	0.005452	0.001672	0.5713	0.8723	5001	2000
GRMZM2G075027	37	44	83	33		beta.i[24706]	0.00131	0.03259	0.0006971	-0.0642	0.0006849	0.06702	5001	2000		pi.1[24706]	0.5243	0.2265	0.004413	0.001707	0.5647	0.8518	5001	2000
GRMZM2G442000	25	94	42	67		beta.i[2226]	0.001486	0.03136	0.0008378	-0.06004	0.001813	0.0654	5001	2000		pi.1[2226]	0.5517	0.2294	0.006064	0.001746	0.5963	0.8728	5001	2000
GRMZM2G510888	28	183	33	30		beta.i[18250]	0.001288	0.03071	0.0005981	-0.05844	0.0007367	0.06183	5001	2000		pi.1[18250]	0.5328	0.2282	0.005718	0.001754	0.5729	0.8642	5001	2000
GRMZM2G051208	54	34	108	78		beta.i[19939]	0.001696	0.03134	0.0007275	-0.05835	0.001598	0.06166	5001	2000		pi.1[19939]	0.5126	0.2184	0.004502	0.001775	0.5442	0.842	5001	2000
GRMZM2G350662	30	64	39	109		beta.i[21973]	0.001493	0.03145	0.0007282	-0.0622	0.002155	0.06174	5001	2000		pi.1[21973]	0.5423	0.2275	0.004549	0.001803	0.5824	0.8685	5001	2000
GRMZM2G164263	21	25	45	99		beta.i[12174]	0.0004454	0.0324	0.0007619	-0.06519	0.0007533	0.06319	5001	2000		pi.1[12174]	0.55	0.2404	0.005557	0.001836	0.5958	0.8835	5001	2000
GRMZM2G055209	3	5	79	170		beta.i[28946]	-4.182e-06	0.03061	0.0006633	-0.05833	-0.0003541	0.06027	5001	2000		pi.1[28946]	0.6903	0.2767	0.006185	0.001866	0.7696	0.9878	5001	2000
GRMZM2G357834	43	15	227	58		beta.i[30540]	0.001991	0.03214	0.0007338	-0.06002	0.002452	0.06601	5001	2000		pi.1[30540]	0.5132	0.2221	0.004663	0.001958	0.5458	0.8382	5001	2000
GRMZM2G055507	51	22	113	67		beta.i[20001]	0.001188	0.03162	0.0006872	-0.05793	0.0008215	0.06339	5001	2000		pi.1[20001]	0.5015	0.2216	0.005951	0.001993	0.5298	0.8283	5001	2000
GRMZM2G015833	74	59	141	23		beta.i[35616]	0.001861	0.03189	0.0007043	-0.06054	0.002873	0.06477	5001	2000		pi.1[35616]	0.4883	0.2105	0.004875	0.002015	0.5194	0.8162	5001	2000
GRMZM2G179002	34	18	94	116		beta.i[12416]	0.002005	0.03198	0.0007876	-0.06	0.001919	0.06392	5001	2000		pi.1[12416]	0.5392	0.2251	0.005441	0.00206	0.5794	0.8632	5001	2000
GRMZM2G398137	7	6	106	168		beta.i[30712]	0.001166	0.03135	0.0007051	-0.05946	0.0008483	0.0615	5001	2000		pi.1[30712]	0.6296	0.2536	0.006113	0.002076	0.6886	0.9459	5001	2000
GRMZM2G468821	5	15	56	48		beta.i[2333]	0.0006663	0.03219	0.0006809	-0.06312	0.00107	0.06354	5001	2000		pi.1[2333]	0.6405	0.2719	0.007196	0.002201	0.706	0.9665	5001	2000
GRMZM2G137968	39	46	69	36		beta.i[6019]	0.001733	0.03161	0.0006433	-0.05907	8.411e-05	0.06836	5001	2000		pi.1[6019]	0.5142	0.2223	0.004948	0.002244	0.5474	0.8544	5001	2000
GRMZM2G033093	32	25	59	105		beta.i[10212]	0.0009275	0.03189	0.0006801	-0.05875	0.0009669	0.06431	5001	2000		pi.1[10212]	0.5256	0.2309	0.004654	0.002302	0.5643	0.8656	5001	2000
GRMZM2G426122	86	25	123	89		beta.i[7747]	0.0007042	0.03163	0.0006716	-0.05976	0.0008926	0.06377	5001	2000		pi.1[7747]	0.4916	0.2114	0.00481	0.002451	0.5218	0.8084	5001	2000
GRMZM5G808899	28	53	46	84		beta.i[38675]	0.001123	0.031	0.000678	-0.05894	0.000726	0.06029	5001	2000		pi.1[38675]	0.5418	0.227	0.004762	0.002471	0.5847	0.8647	5001	2000
GRMZM2G302701	33	39	87	65		beta.i[12459]	0.0001296	0.03196	0.0006378	-0.06206	0.0002018	0.06335	5001	2000		pi.1[12459]	0.5388	0.2247	0.005154	0.002483	0.5708	0.8691	5001	2000
AC208337.2_FG003	23	38	74	54		beta.i[31885]	0.001168	0.03113	0.000701	-0.05873	0.0008344	0.06313	5001	2000		pi.1[31885]	0.5498	0.2338	0.004953	0.002508	0.5923	0.8772	5001	2000
AC234152.1_FG002	51	9	177	184		beta.i[35411]	0.001697	0.03156	0.0007034	-0.06004	0.001727	0.06157	5001	2000		pi.1[35411]	0.5081	0.2222	0.003965	0.002545	0.5427	0.8424	5001	2000
GRMZM2G046040	39	36	60	67		beta.i[4246]	0.002368	0.03194	0.0006087	-0.06131	0.003352	0.06353	5001	2000		pi.1[4246]	0.5193	0.2271	0.004373	0.002595	0.55	0.8561	5001	2000
GRMZM2G070374	88	41	89	80		beta.i[20180]	0.002314	0.03144	0.0006231	-0.05838	0.001577	0.06405	5001	2000		pi.1[20180]	0.4948	0.2118	0.004772	0.002667	0.5239	0.8229	5001	2000
GRMZM2G166713	145	21	119	101		beta.i[21510]	0.001003	0.03134	0.0006402	-0.06088	0.002375	0.06269	5001	2000		pi.1[21510]	0.465	0.2025	0.003786	0.002755	0.4897	0.7878	5001	2000
GRMZM2G345687	18	30	99	57		beta.i[30492]	0.0003618	0.03176	0.0006135	-0.06304	0.000554	0.06266	5001	2000		pi.1[30492]	0.5747	0.2347	0.004525	0.002779	0.6161	0.9036	5001	2000
GRMZM2G088361	33	24	86	90		beta.i[29258]	2.66e-05	0.03145	0.0007299	-0.05939	-0.0001542	0.06405	5001	2000		pi.1[29258]	0.5412	0.2258	0.005927	0.002937	0.5781	0.8612	5001	2000
GRMZM2G018146	28	76	48	27		beta.i[9980]	0.0002767	0.03124	0.0007674	-0.06202	0.0008544	0.06305	5001	2000		pi.1[9980]	0.5261	0.2322	0.005295	0.002966	0.5585	0.8664	5001	2000
GRMZM2G332348	63	37	64	96		beta.i[7065]	0.0006609	0.0322	0.0007248	-0.0615	0.001842	0.06402	5001	2000		pi.1[7065]	0.5049	0.2235	0.005185	0.002986	0.5431	0.8363	5001	2000
GRMZM2G130927	66	29	80	106		beta.i[25589]	0.0007675	0.0321	0.0007123	-0.06177	0.0004553	0.06475	5001	2000		pi.1[25589]	0.5007	0.2179	0.00497	0.003023	0.5319	0.8346	5001	2000
GRMZM2G143590	37	24	44	130		beta.i[1398]	0.00152	0.03147	0.0006673	-0.05977	0.002288	0.06152	5001	2000		pi.1[1398]	0.5254	0.2313	0.003717	0.003043	0.5702	0.8562	5001	2000
GRMZM2G163860	26	15	87	151		beta.i[33593]	0.001419	0.03138	0.0007197	-0.05904	0.002027	0.06112	5001	2000		pi.1[33593]	0.551	0.2326	0.005253	0.003056	0.5909	0.8754	5001	2000
CRTISO2	30	42	70	93		beta.i[11349]	0.0008095	0.03187	0.0007585	-0.06338	0.001646	0.06292	5001	2000		pi.1[11349]	0.5556	0.2263	0.005311	0.00308	0.6017	0.8731	5001	2000
GRMZM2G070351	34	35	47	173		beta.i[24640]	0.002671	0.03072	0.0007142	-0.05851	0.002407	0.06172	5001	2000		pi.1[24640]	0.5461	0.2214	0.00477	0.003086	0.5883	0.8629	5001	2000
GRMZM2G157113	113	15	145	148		beta.i[30026]	0.001661	0.03139	0.0007281	-0.05966	0.001972	0.06414	5001	2000		pi.1[30026]	0.4642	0.2091	0.004532	0.003098	0.4873	0.7974	5001	2000
GRMZM5G839593	6	46	41	52		beta.i[27855]	0.001292	0.0311	0.0006203	-0.05847	0.001329	0.0618	5001	2000		pi.1[27855]	0.6246	0.2608	0.005741	0.003147	0.6826	0.9496	5001	2000
GRMZM2G017792	7	31	76	56		beta.i[3686]	0.0009958	0.03156	0.0005997	-0.06172	0.002061	0.06053	5001	2000		pi.1[3686]	0.6203	0.2551	0.005676	0.003149	0.6787	0.944	5001	2000
GRMZM2G048291	45	25	92	91		beta.i[19902]	0.001911	0.03201	0.0008176	-0.0593	0.002243	0.06854	5001	2000		pi.1[19902]	0.5149	0.2254	0.005095	0.003198	0.5532	0.8493	5001	2000
GRMZM2G151967	47	14	107	117		beta.i[6266]	0.0002639	0.03113	0.0005929	-0.05945	0.000312	0.06015	5001	2000		pi.1[6266]	0.5141	0.2176	0.005365	0.003247	0.5453	0.8372	5001	2000
GRMZM2G077596	12	12	56	262		beta.i[4836]	0.0003024	0.03038	0.0007044	-0.05854	-9.923e-06	0.06111	5001	2000		pi.1[4836]	0.6045	0.2411	0.005431	0.003256	0.6637	0.9152	5001	2000
GRMZM5G852447	3	2	116	411		beta.i[42178]	0.0001044	0.03079	0.0007353	-0.06183	0.001378	0.0595	5001	2000		pi.1[42178]	0.7023	0.2712	0.006441	0.003314	0.7821	0.9905	5001	2000
GRMZM2G119482	56	39	85	110		beta.i[20858]	0.001169	0.03065	0.0006794	-0.05991	0.002037	0.05941	5001	2000		pi.1[20858]	0.5197	0.2172	0.004844	0.003354	0.5566	0.8439	5001	2000
GRMZM2G081380	6	33	55	80		beta.i[15950]	0.0005437	0.03144	0.0008045	-0.06121	0.0005411	0.06354	5001	2000		pi.1[15950]	0.6441	0.2541	0.006779	0.003396	0.6989	0.9549	5001	2000
GRMZM2G033905	122	36	72	108		beta.i[15268]	0.001655	0.03155	0.0007203	-0.06212	0.002102	0.06224	5001	2000		pi.1[15268]	0.4709	0.2067	0.004851	0.0034	0.4936	0.7983	5001	2000
GRMZM2G127941	7	7	123	115		beta.i[5835]	0.0006973	0.03191	0.000818	-0.06299	0.0005463	0.06467	5001	2000		pi.1[5835]	0.6208	0.2564	0.005635	0.003415	0.6767	0.9458	5001	2000
GRMZM2G175008	44	28	93	88		beta.i[12337]	0.003333	0.03171	0.0005522	-0.05654	0.001993	0.07123	5001	2000		pi.1[12337]	0.5275	0.2222	0.00485	0.003441	0.5669	0.8484	5001	2000
GRMZM2G000777	31	44	89	56		beta.i[35438]	0.00109	0.03192	0.0007032	-0.06299	0.001293	0.0644	5001	2000		pi.1[35438]	0.542	0.2278	0.00547	0.003516	0.5844	0.8621	5001	2000
GRMZM2G330095	137	89	131	20		beta.i[7047]	-0.000473	0.0315	0.000784	-0.06155	-0.0002587	0.05894	5001	2000		pi.1[7047]	0.4675	0.2029	0.004377	0.003528	0.4908	0.7841	5001	2000
GRMZM2G157153	14	26	104	69		beta.i[37276]	0.001035	0.03145	0.0006663	-0.06159	0.001699	0.06147	5001	2000		pi.1[37276]	0.5889	0.2406	0.00496	0.003536	0.6408	0.9081	5001	2000
GRMZM2G536099	172	67	81	41		beta.i[34612]	0.001172	0.03188	0.0007605	-0.0613	0.001371	0.06354	5001	2000		pi.1[34612]	0.4608	0.2002	0.005088	0.003551	0.4853	0.7831	5001	2000
GRMZM2G117956	10	18	72	115		beta.i[40446]	-0.0001697	0.03089	0.0006251	-0.05923	-0.0002626	0.06077	5001	2000		pi.1[40446]	0.6162	0.2468	0.005343	0.003556	0.6641	0.9275	5001	2000
GRMZM2G000491	88	37	89	98		beta.i[3322]	0.001896	0.0316	0.0007926	-0.06059	0.001131	0.06318	5001	2000		pi.1[3322]	0.4883	0.2079	0.005129	0.003655	0.5179	0.8123	5001	2000
GRMZM2G030542	48	31	88	82		beta.i[19684]	0.00214	0.03173	0.0007128	-0.06161	0.002194	0.06292	5001	2000		pi.1[19684]	0.5262	0.2168	0.005127	0.003701	0.5578	0.8442	5001	2000
GRMZM2G010202	38	36	66	99		beta.i[35557]	0.001934	0.03194	0.0008145	-0.0623	0.001827	0.06618	5001	2000		pi.1[35557]	0.538	0.2237	0.004844	0.003732	0.5714	0.8592	5001	2000
GRMZM2G019180	116	91	51	38		beta.i[28597]	0.002511	0.03179	0.000806	-0.06055	0.003219	0.06415	5001	2000		pi.1[28597]	0.4667	0.2102	0.004812	0.003822	0.4966	0.7902	5001	2000
GRMZM2G426556	37	32	69	122		beta.i[13252]	0.001099	0.03122	0.0005422	-0.06001	0.001266	0.06215	5001	2000		pi.1[13252]	0.5277	0.2268	0.005473	0.003992	0.5656	0.8632	5001	2000
GRMZM2G703783	71	35	78	60		beta.i[8603]	0.001182	0.0311	0.0008686	-0.06081	0.001459	0.06325	5001	2000		pi.1[8603]	0.4863	0.2129	0.004992	0.004211	0.5078	0.809	5001	2000
GRMZM2G135322	16	24	112	105		beta.i[16619]	0.001273	0.03149	0.0007131	-0.05965	0.001271	0.06374	5001	2000		pi.1[16619]	0.5876	0.2322	0.004925	0.004211	0.629	0.9019	5001	2000
GRMZM2G038820	26	58	44	65		beta.i[19775]	0.00203	0.03144	0.0007299	-0.05915	0.002667	0.06367	5001	2000		pi.1[19775]	0.551	0.2297	0.005106	0.004266	0.5966	0.8795	5001	2000
GRMZM2G152686	11	30	56	95		beta.i[16826]	0.0002055	0.03195	0.0006455	-0.06454	-0.0003183	0.06369	5001	2000		pi.1[16826]	0.6085	0.2439	0.005898	0.004273	0.6603	0.9279	5001	2000
GRMZM2G117544	10	80	49	45		beta.i[25355]	0.001678	0.03216	0.0008701	-0.06205	0.001211	0.06294	5001	2000		pi.1[25355]	0.6035	0.2416	0.005607	0.004282	0.6536	0.9228	5001	2000
GRMZM2G446426	40	30	62	106		beta.i[22439]	0.001713	0.0317	0.0007507	-0.06486	0.001562	0.0633	5001	2000		pi.1[22439]	0.5269	0.225	0.005206	0.00431	0.5636	0.8547	5001	2000
GRMZM2G096352	37	33	77	71		beta.i[40207]	0.001974	0.03313	0.0008692	-0.06453	0.002513	0.06623	5001	2000		pi.1[40207]	0.5339	0.2243	0.005339	0.004334	0.5682	0.8624	5001	2000
GRMZM2G383623	13	7	176	118		beta.i[30649]	0.00115	0.03109	0.0006253	-0.06187	0.001515	0.06053	5001	2000		pi.1[30649]	0.5877	0.2414	0.005415	0.004488	0.6379	0.9122	5001	2000
GRMZM2G396430	3	2	176	264		beta.i[7513]	0.0009181	0.03111	0.0005746	-0.06102	0.000352	0.06063	5001	2000		pi.1[7513]	0.6925	0.27	0.00731	0.004499	0.7723	0.9908	5001	2000
GRMZM2G154565	11	16	137	54		beta.i[6326]	0.0008413	0.03179	0.0007758	-0.06342	0.001224	0.06236	5001	2000		pi.1[6326]	0.5913	0.2413	0.005413	0.004602	0.6382	0.9157	5001	2000
GRMZM2G022368	8	60	40	46		beta.i[15114]	0.0004838	0.03178	0.0006008	-0.06249	0.0004803	0.06264	5001	2000		pi.1[15114]	0.6055	0.2501	0.005511	0.00464	0.6553	0.9325	5001	2000
GRMZM2G172852	95	50	42	66		beta.i[37477]	0.002051	0.03065	0.0006415	-0.05823	0.002202	0.06194	5001	2000		pi.1[37477]	0.4761	0.2136	0.004684	0.004694	0.5018	0.8053	5001	2000
GRMZM2G026452	82	139	33	34		beta.i[35735]	0.002266	0.03145	0.0008878	-0.05762	0.001544	0.06532	5001	2000		pi.1[35735]	0.4845	0.2143	0.005345	0.004726	0.5159	0.8115	5001	2000
GRMZM2G066163	22	25	69	68		beta.i[757]	0.001652	0.03118	0.0007111	-0.06201	0.001701	0.06279	5001	2000		pi.1[757]	0.5444	0.2387	0.005677	0.004775	0.5874	0.8814	5001	2000
GRMZM2G067171	108	60	50	54		beta.i[15755]	0.001848	0.03237	0.0005748	-0.05972	0.001357	0.06581	5001	2000		pi.1[15755]	0.4712	0.2103	0.004827	0.004784	0.5031	0.8021	5001	2000
GRMZM2G133434	7	11	108	150		beta.i[25617]	0.001244	0.03199	0.0007086	-0.0613	0.001928	0.06551	5001	2000		pi.1[25617]	0.6475	0.2445	0.005184	0.004792	0.7074	0.9468	5001	2000
GRMZM2G136538	20	53	58	71		beta.i[40613]	-0.0001864	0.03116	0.0007972	-0.06156	0.0005969	0.06338	5001	2000		pi.1[40613]	0.5656	0.2296	0.00507	0.004794	0.604	0.8922	5001	2000
GRMZM5G885445	118	116	38	41		beta.i[14448]	0.001125	0.03263	0.0008344	-0.06207	0.002025	0.06398	5001	2000		pi.1[14448]	0.4686	0.2079	0.005062	0.004808	0.4957	0.7922	5001	2000
GRMZM2G162931	23	27	75	92		beta.i[6488]	0.002354	0.03075	0.0005452	-0.05647	0.002392	0.06271	5001	2000		pi.1[6488]	0.5592	0.2305	0.003941	0.004874	0.5994	0.8801	5001	2000
GRMZM2G106622	49	50	92	47		beta.i[1086]	0.002075	0.03241	0.000578	-0.05924	0.001458	0.06711	5001	2000		pi.1[1086]	0.5155	0.2231	0.005346	0.00489	0.5561	0.8414	5001	2000
GRMZM2G000633	6	17	61	96		beta.i[196]	0.0006624	0.03142	0.0006944	-0.06043	0.0008763	0.06158	5001	2000		pi.1[196]	0.6422	0.2653	0.006139	0.004916	0.7112	0.9595	5001	2000
GRMZM5G866082	12	26	62	87		beta.i[23241]	0.0005867	0.03181	0.0004908	-0.06178	0.001618	0.06485	5001	2000		pi.1[23241]	0.6038	0.2415	0.006129	0.004968	0.6532	0.9178	5001	2000
GRMZM5G866809	41	38	82	62		beta.i[23248]	0.0004322	0.03177	0.0006351	-0.06078	0.000391	0.06373	5001	2000		pi.1[23248]	0.5282	0.2212	0.005177	0.004977	0.5629	0.8549	5001	2000
GRMZM2G455587	15	21	114	73		beta.i[30951]	0.001495	0.03207	0.0008258	-0.06159	0.00192	0.06328	5001	2000		pi.1[30951]	0.592	0.2391	0.004466	0.005045	0.6399	0.9071	5001	2000
GRMZM2G169871	19	29	63	98		beta.i[21546]	0.0008923	0.03132	0.0007947	-0.06102	0.0006486	0.06241	5001	2000		pi.1[21546]	0.5746	0.2377	0.00573	0.005124	0.6231	0.8945	5001	2000
GRMZM2G401827	2	4	68	275		beta.i[2079]	0.001024	0.03169	0.000719	-0.06366	0.001361	0.06324	5001	2000		pi.1[2079]	0.7179	0.2748	0.006952	0.00514	0.8065	0.994	5001	2000
GRMZM2G460090	57	33	99	83		beta.i[22515]	0.001781	0.03164	0.0007829	-0.06234	0.003337	0.06253	5001	2000		pi.1[22515]	0.5131	0.2188	0.004452	0.00517	0.5482	0.8414	5001	2000
GRMZM2G049201	22	40	105	35		beta.i[4317]	0.0007175	0.03172	0.0007209	-0.0597	0.0002931	0.06331	5001	2000		pi.1[4317]	0.5459	0.2298	0.004713	0.005188	0.5798	0.8782	5001	2000
GRMZM5G840572	108	314	54	14		beta.i[2707]	0.002436	0.0333	0.0008037	-0.06011	0.002271	0.06989	5001	2000		pi.1[2707]	0.4735	0.2045	0.005203	0.005195	0.4958	0.7999	5001	2000
GRMZM2G170413	19	6	423	225		beta.i[26155]	0.0005254	0.0313	0.0008523	-0.06164	0.000895	0.06291	5001	2000		pi.1[26155]	0.5707	0.2288	0.004795	0.005205	0.609	0.8888	5001	2000
GRMZM2G080851	16	11	119	122		beta.i[36377]	0.001308	0.0313	0.0006454	-0.06225	0.001844	0.06091	5001	2000		pi.1[36377]	0.5764	0.2399	0.005631	0.005229	0.6246	0.9017	5001	2000
MET2A	42	16	57	186		beta.i[440]	0.0006316	0.0309	0.0006616	-0.06086	-0.0001849	0.06228	5001	2000		pi.1[440]	0.521	0.227	0.0048	0.005249	0.5597	0.8447	5001	2000
AC235547.1_FG005	31	6	150	304		beta.i[3314]	0.002052	0.03168	0.000826	-0.05986	0.002328	0.06501	5001	2000		pi.1[3314]	0.5351	0.2274	0.005733	0.005266	0.5802	0.8652	5001	2000
GRMZM2G529313	22	17	99	116		beta.i[41823]	0.002035	0.03157	0.000795	-0.05905	0.002691	0.06413	5001	2000		pi.1[41823]	0.5643	0.2379	0.005589	0.005366	0.6126	0.8968	5001	2000
GRMZM2G118047	128	56	70	68		beta.i[40450]	0.00178	0.03086	0.0007616	-0.05894	0.002403	0.06431	5001	2000		pi.1[40450]	0.4721	0.2068	0.004472	0.005381	0.4927	0.8108	5001	2000
GRMZM2G024348	33	57	52	84		beta.i[15142]	0.0008836	0.03115	0.0007323	-0.05985	0.001204	0.06318	5001	2000		pi.1[15142]	0.5363	0.2248	0.005859	0.005406	0.5686	0.8643	5001	2000
GRMZM2G081689	24	22	84	85		beta.i[10969]	0.001047	0.03115	0.0007077	-0.06253	0.002104	0.06186	5001	2000		pi.1[10969]	0.5612	0.2281	0.005346	0.005509	0.6027	0.8856	5001	2000
GRMZM2G052844	26	32	18	460		beta.i[36055]	0.000878	0.03142	0.0007948	-0.06176	0.001057	0.06299	5001	2000		pi.1[36055]	0.5436	0.2373	0.005783	0.005535	0.5873	0.878	5001	2000
GRMZM2G060516	25	34	65	77		beta.i[36142]	0.00091	0.03182	0.0006838	-0.06381	0.001676	0.06256	5001	2000		pi.1[36142]	0.5475	0.2256	0.005651	0.005555	0.5883	0.8718	5001	2000
GRMZM2G700046	16	11	76	158		beta.i[34720]	0.001295	0.03128	0.0006635	-0.0606	0.001133	0.06411	5001	2000		pi.1[34720]	0.5822	0.2364	0.005465	0.005587	0.6285	0.9027	5001	2000
GRMZM2G376595	7	15	63	105		beta.i[26704]	0.001029	0.03135	0.0005585	-0.0627	0.001102	0.06301	5001	2000		pi.1[26704]	0.6268	0.2548	0.005864	0.005733	0.6865	0.9421	5001	2000
GRMZM2G107727	63	40	87	60		beta.i[5406]	0.001228	0.03239	0.0006553	-0.06057	0.001101	0.06638	5001	2000		pi.1[5406]	0.4999	0.2169	0.004932	0.005794	0.5307	0.8263	5001	2000
GRMZM2G125241	7	26	32	241		beta.i[5793]	0.001793	0.0332	0.0007267	-0.06197	0.003441	0.06621	5001	2000		pi.1[5793]	0.6457	0.2485	0.00535	0.005797	0.7095	0.9474	5001	2000
GRMZM2G175269	19	36	44	74		beta.i[1655]	0.001645	0.03061	0.0006744	-0.05783	0.001769	0.06186	5001	2000		pi.1[1655]	0.562	0.2402	0.004707	0.0058	0.6025	0.889	5001	2000
GRMZM2G440259	147	37	103	106		beta.i[2218]	0.001512	0.03237	0.0007196	-0.06314	0.002242	0.06439	5001	2000		pi.1[2218]	0.4761	0.2027	0.004212	0.00582	0.5069	0.7924	5001	2000
GRMZM5G847707	178	87	57	56		beta.i[27897]	0.002023	0.03139	0.0007732	-0.05997	0.002058	0.0636	5001	2000		pi.1[27897]	0.4638	0.2034	0.004817	0.005821	0.4987	0.7732	5001	2000
GRMZM2G352959	8	4	201	281		beta.i[33956]	0.001486	0.03215	0.0006882	-0.06092	0.001755	0.0643	5001	2000		pi.1[33956]	0.6328	0.2468	0.005454	0.00585	0.6932	0.9386	5001	2000
GRMZM2G053644	2	5	87	152		beta.i[4382]	0.001004	0.03155	0.0007965	-0.06084	0.001278	0.06288	5001	2000		pi.1[4382]	0.6946	0.28	0.00826	0.005908	0.7732	0.9917	5001	2000
GRMZM2G166721	244	24	165	169		beta.i[17013]	0.001385	0.03186	0.0007844	-0.06198	0.001619	0.06638	5001	2000		pi.1[17013]	0.4502	0.1967	0.004453	0.005911	0.4763	0.769	5001	2000
AC203300.3_FG004	26	40	67	67		beta.i[39176]	0.001256	0.03078	0.0006327	-0.06157	0.001684	0.06131	5001	2000		pi.1[39176]	0.5601	0.2269	0.004429	0.00593	0.598	0.8855	5001	2000
GRMZM5G881568	10	50	56	55		beta.i[9241]	0.0009893	0.03151	0.00076	-0.05924	0.0001338	0.06609	5001	2000		pi.1[9241]	0.6055	0.2398	0.005728	0.006065	0.6482	0.9246	5001	2000
GRMZM2G416156	138	85	66	27		beta.i[7667]	0.001305	0.03154	0.0006905	-0.06148	0.0005913	0.06538	5001	2000		pi.1[7667]	0.4566	0.209	0.004711	0.006126	0.4744	0.789	5001	2000
GRMZM2G157588	20	36	56	60		beta.i[16885]	0.001487	0.03195	0.0007602	-0.05965	0.001053	0.06341	5001	2000		pi.1[16885]	0.5594	0.2383	0.00573	0.006134	0.5985	0.893	5001	2000
GRMZM2G003595	67	44	72	103		beta.i[3398]	0.001191	0.03237	0.0006769	-0.0627	0.001834	0.06295	5001	2000		pi.1[3398]	0.513	0.2187	0.004987	0.006156	0.5459	0.8282	5001	2000
GRMZM5G864110	143	117	29	57		beta.i[14304]	0.002274	0.03128	0.0007243	-0.05897	0.002116	0.06542	5001	2000		pi.1[14304]	0.4563	0.2034	0.004592	0.006205	0.4776	0.7871	5001	2000
GRMZM2G331754	39	37	113	43		beta.i[33885]	0.001752	0.03149	0.0008265	-0.06119	0.001692	0.06362	5001	2000		pi.1[33885]	0.5182	0.2241	0.003988	0.006296	0.5547	0.8491	5001	2000
GRMZM2G349344	53	30	120	95		beta.i[12771]	0.0005374	0.03178	0.0007139	-0.05861	-0.0007231	0.06395	5001	2000		pi.1[12771]	0.523	0.2163	0.004948	0.006326	0.5535	0.8472	5001	2000
GRMZM2G426050	118	70	50	91		beta.i[7745]	0.0004278	0.03149	0.0007636	-0.06241	0.0006159	0.06278	5001	2000		pi.1[7745]	0.4819	0.2047	0.003785	0.006351	0.5092	0.8001	5001	2000
GRMZM2G399750	14	16	97	124		beta.i[26851]	0.0009204	0.03123	0.0008291	-0.05944	0.001645	0.06392	5001	2000		pi.1[26851]	0.5881	0.2424	0.005111	0.006372	0.6451	0.91	5001	2000
GRMZM2G326272	8	12	85	157		beta.i[26450]	0.0008865	0.03188	0.0006069	-0.06154	0.0009074	0.06252	5001	2000		pi.1[26450]	0.6329	0.2526	0.005709	0.006436	0.694	0.94	5001	2000
GRMZM5G876520	72	110	51	60		beta.i[18900]	0.000829	0.03191	0.0006299	-0.06029	0.000471	0.06615	5001	2000		pi.1[18900]	0.5055	0.2122	0.004318	0.006501	0.535	0.831	5001	2000
GRMZM2G023791	14	27	51	55		beta.i[3788]	0.000354	0.03146	0.0007519	-0.05892	-0.001208	0.06459	5001	2000		pi.1[3788]	0.5681	0.2491	0.005725	0.006516	0.614	0.9077	5001	2000
GRMZM2G517529	68	162	47	28		beta.i[41804]	0.001383	0.03111	0.0007549	-0.06031	0.001763	0.06136	5001	2000		pi.1[41804]	0.5004	0.2163	0.005041	0.006518	0.5365	0.8201	5001	2000
GRMZM5G842101	3	14	63	80		beta.i[38836]	-0.000479	0.03144	0.000683	-0.05996	0.0001853	0.06078	5001	2000		pi.1[38836]	0.6924	0.2657	0.006354	0.006523	0.7671	0.9882	5001	2000
GRMZM5G856681	29	39	103	95		beta.i[42198]	0.001094	0.03146	0.0008865	-0.05814	0.0009166	0.06147	5001	2000		pi.1[42198]	0.5651	0.2243	0.005711	0.006599	0.6067	0.8767	5001	2000
GRMZM2G337599	35	68	66	23		beta.i[41186]	0.002094	0.03162	0.000686	-0.05878	0.001961	0.06265	5001	2000		pi.1[41186]	0.5242	0.2252	0.006545	0.006607	0.5561	0.8545	5001	2000
GRMZM2G391269	39	83	49	79		beta.i[2044]	0.0005631	0.0322	0.0007292	-0.06403	0.001044	0.0631	5001	2000		pi.1[2044]	0.5406	0.2229	0.00478	0.006636	0.574	0.8636	5001	2000
GRMZM5G811444	25	26	74	66		beta.i[14001]	0.0004742	0.03127	0.0007073	-0.0605	0.0002411	0.06119	5001	2000		pi.1[14001]	0.5482	0.2263	0.004851	0.006686	0.5837	0.875	5001	2000
GRMZM2G413652	82	24	87	200		beta.i[38059]	0.0003356	0.03109	0.0006522	-0.06023	-0.0004253	0.06378	5001	2000		pi.1[38059]	0.5068	0.2116	0.004993	0.006691	0.5397	0.8255	5001	2000
AC197387.3_FG004	12	7	122	138		beta.i[3037]	0.001564	0.03214	0.0007525	-0.06027	0.001446	0.06295	5001	2000		pi.1[3037]	0.5956	0.2494	0.005312	0.006695	0.6497	0.9234	5001	2000
GRMZM2G051135	18	53	45	49		beta.i[39773]	0.001408	0.03151	0.0007504	-0.05873	0.002872	0.06211	5001	2000		pi.1[39773]	0.5699	0.2346	0.004993	0.006739	0.6159	0.8938	5001	2000
GRMZM2G529674	102	66	36	62		beta.i[13728]	0.001085	0.03175	0.0006059	-0.0619	0.0007524	0.0617	5001	2000		pi.1[13728]	0.4785	0.2123	0.004501	0.006768	0.5086	0.8072	5001	2000
AC212560.4_FG003	8	4	221	192		beta.i[9620]	0.001157	0.03135	0.0007922	-0.06337	0.001781	0.06023	5001	2000		pi.1[9620]	0.6152	0.2521	0.005828	0.006835	0.6687	0.938	5001	2000
GRMZM2G113174	10	25	36	247		beta.i[5539]	0.0007355	0.03168	0.000633	-0.06511	0.001004	0.06099	5001	2000		pi.1[5539]	0.627	0.2424	0.005957	0.006846	0.6803	0.937	5001	2000
AC233888.1_FG001	59	16	222	81		beta.i[166]	0.0002559	0.03188	0.0006593	-0.06146	0.0002151	0.06378	5001	2000		pi.1[166]	0.501	0.213	0.004056	0.006847	0.5287	0.8219	5001	2000
GRMZM2G455433	69	24	78	89		beta.i[7979]	0.001415	0.03183	0.000644	-0.06191	0.0006399	0.06452	5001	2000		pi.1[7979]	0.4933	0.2145	0.00427	0.006864	0.527	0.8172	5001	2000
GRMZM2G052148	20	27	98	61		beta.i[4358]	0.0002186	0.03085	0.0006018	-0.05811	0.0004063	0.05855	5001	2000		pi.1[4358]	0.5697	0.2331	0.00509	0.00687	0.6123	0.8874	5001	2000
GRMZM2G040600	3	9	131	86		beta.i[32371]	0.0009385	0.03208	0.0006201	-0.06102	0.001409	0.0633	5001	2000		pi.1[32371]	0.6847	0.2674	0.005539	0.006929	0.7559	0.9829	5001	2000
GRMZM2G126946	16	21	56	87		beta.i[20993]	0.0005143	0.03161	0.0006216	-0.0596	0.001022	0.06159	5001	2000		pi.1[20993]	0.5682	0.2376	0.00553	0.006937	0.6135	0.899	5001	2000
GRMZM2G329325	33	39	70	109		beta.i[37684]	0.001652	0.03177	0.0007155	-0.05976	0.001313	0.062	5001	2000		pi.1[37684]	0.5524	0.2226	0.004975	0.006971	0.5953	0.8666	5001	2000
AC206223.3_FG010	14	7	154	213		beta.i[39201]	0.00154	0.03248	0.0006114	-0.06302	0.002015	0.06408	5001	2000		pi.1[39201]	0.5966	0.2345	0.00517	0.006982	0.6385	0.9156	5001	2000
AC190609.3_FG004	20	30	61	104		beta.i[19077]	0.001004	0.03115	0.0007206	-0.06003	0.001115	0.05978	5001	2000		pi.1[19077]	0.5681	0.2307	0.00573	0.006993	0.608	0.8931	5001	2000
GRMZM2G117207	21	47	50	50		beta.i[40438]	0.002024	0.03155	0.000648	-0.06036	0.002817	0.0635	5001	2000		pi.1[40438]	0.5596	0.2362	0.005256	0.007004	0.6034	0.8923	5001	2000
GRMZM2G019597	26	38	92	52		beta.i[19554]	0.001508	0.03069	0.0007279	-0.0573	0.0006246	0.06333	5001	2000		pi.1[19554]	0.5541	0.2311	0.004716	0.007019	0.5927	0.8815	5001	2000
GRMZM2G472696	35	28	92	86		beta.i[41698]	0.002022	0.03138	0.0006698	-0.05935	0.00269	0.06245	5001	2000		pi.1[41698]	0.5348	0.2258	0.005185	0.007033	0.5696	0.8668	5001	2000
ycf72-1	23	25	110	63		beta.i[22365]	-0.0001409	0.03136	0.0007599	-0.0628	-0.0002272	0.06315	5001	2000		pi.1[22365]	0.5483	0.234	0.004613	0.007091	0.5869	0.8775	5001	2000
AC194022.3_FG012	4	5	106	139		beta.i[14612]	0.001545	0.03125	0.0005693	-0.05887	0.001086	0.06193	5001	2000		pi.1[14612]	0.6649	0.267	0.006939	0.007124	0.7355	0.9773	5001	2000
GRMZM2G126552	33	84	43	34		beta.i[20985]	0.00151	0.03176	0.000676	-0.06001	0.001012	0.06299	5001	2000		pi.1[20985]	0.5254	0.2251	0.004602	0.007147	0.564	0.8543	5001	2000
GRMZM2G305211	26	8	221	258		beta.i[33780]	0.001327	0.0324	0.0007482	-0.06529	0.001777	0.06574	5001	2000		pi.1[33780]	0.5613	0.2252	0.005243	0.007152	0.6046	0.8771	5001	2000
GRMZM2G085547	48	49	58	105		beta.i[20401]	0.001622	0.03171	0.0007217	-0.06021	0.001685	0.06194	5001	2000		pi.1[20401]	0.5304	0.2163	0.004929	0.00717	0.5611	0.847	5001	2000
GRMZM2G076657	12	19	69	87		beta.i[15882]	0.001027	0.03112	0.0006234	-0.06068	0.002066	0.06139	5001	2000		pi.1[15882]	0.5886	0.2388	0.005037	0.007242	0.6342	0.9119	5001	2000
MZPPT1	13	27	59	92		beta.i[10451]	0.002787	0.03161	0.0007085	-0.06032	0.002903	0.06446	5001	2000		pi.1[10451]	0.5922	0.2423	0.005367	0.007296	0.6448	0.9056	5001	2000
GRMZM2G034631	35	26	64	70		beta.i[28743]	0.001341	0.03085	0.0008699	-0.06006	0.002782	0.0581	5001	2000		pi.1[28743]	0.5216	0.2245	0.005548	0.007349	0.551	0.8544	5001	2000
GRMZM2G470438	107	69	117	21		beta.i[8100]	0.001731	0.03117	0.0007101	-0.0587	0.0007533	0.0651	5001	2000		pi.1[8100]	0.47	0.2095	0.005494	0.007356	0.4964	0.8022	5001	2000
GRMZM2G383967	77	106	36	49		beta.i[2027]	0.001809	0.03194	0.0007268	-0.06404	0.001664	0.06213	5001	2000		pi.1[2027]	0.4881	0.2152	0.004676	0.007366	0.5215	0.8211	5001	2000
GRMZM2G102808	28	38	86	70		beta.i[29417]	0.0002642	0.03235	0.0008414	-0.06288	-0.0002438	0.06021	5001	2000		pi.1[29417]	0.5499	0.2297	0.005261	0.007391	0.5885	0.8695	5001	2000
GRMZM2G005155	52	37	68	83		beta.i[9794]	0.0008561	0.03151	0.0006898	-0.05859	0.0003947	0.0618	5001	2000		pi.1[9794]	0.5172	0.2188	0.004971	0.007438	0.5502	0.842	5001	2000
GRMZM5G817275	14	6	125	243		beta.i[14030]	-0.0007739	0.03194	0.0007484	-0.06171	-0.0007352	0.06403	5001	2000		pi.1[14030]	0.591	0.2382	0.005961	0.007438	0.639	0.9056	5001	2000
GRMZM2G009163	39	32	60	127		beta.i[39404]	0.0004655	0.03196	0.0008595	-0.0634	0.0008804	0.0604	5001	2000		pi.1[39404]	0.5309	0.2277	0.005914	0.007483	0.5699	0.8628	5001	2000
GRMZM2G065105	23	43	53	96		beta.i[29048]	0.0009542	0.03185	0.000719	-0.06078	0.0009754	0.0642	5001	2000		pi.1[29048]	0.5602	0.2312	0.00542	0.007517	0.6063	0.8868	5001	2000
AC192244.3_FG001	6	3	303	278		beta.i[23459]	0.0003829	0.03103	0.0007184	-0.06171	0.001122	0.058	5001	2000		pi.1[23459]	0.6546	0.246	0.005033	0.007546	0.7096	0.9601	5001	2000
GRMZM2G147772	56	88	30	117		beta.i[21251]	0.001083	0.03175	0.0009046	-0.06143	0.001234	0.06432	5001	2000		pi.1[21251]	0.5115	0.2171	0.005472	0.007622	0.5481	0.8348	5001	2000
GRMZM2G471517	22	255	23	35		beta.i[18117]	0.001752	0.03172	0.0007464	-0.06146	0.001608	0.06272	5001	2000		pi.1[18117]	0.5363	0.2284	0.00495	0.00764	0.5775	0.8617	5001	2000
GRMZM2G025154	9	34	37	181		beta.i[19622]	0.001147	0.03139	0.0007254	-0.06091	0.001584	0.06332	5001	2000		pi.1[19622]	0.6289	0.248	0.005418	0.007647	0.6897	0.9328	5001	2000
GRMZM2G370193	16	16	69	80		beta.i[17608]	0.0006954	0.03155	0.0006324	-0.06075	0.0006224	0.06365	5001	2000		pi.1[17608]	0.5674	0.2414	0.004933	0.007693	0.6205	0.9012	5001	2000
GRMZM2G341934	8	17	47	154		beta.i[7121]	0.0003282	0.03149	0.0006805	-0.06038	-0.000416	0.06396	5001	2000		pi.1[7121]	0.6215	0.2533	0.00546	0.007707	0.6777	0.9429	5001	2000
GRMZM2G442763	6	27	70	83		beta.i[7866]	0.0008555	0.03196	0.000821	-0.063	0.0005246	0.06407	5001	2000		pi.1[7866]	0.6475	0.2516	0.005799	0.007741	0.71	0.9551	5001	2000
Z013I05_12	49	18	169	138		beta.i[8089]	0.0004012	0.03148	0.0006905	-0.0615	0.0003461	0.06195	5001	2000		pi.1[8089]	0.5173	0.2176	0.00506	0.007755	0.5535	0.8417	5001	2000
GRMZM2G358618	8	7	109	153		beta.i[17525]	0.000705	0.03132	0.0006345	-0.0586	-0.0001863	0.06239	5001	2000		pi.1[17525]	0.6137	0.2473	0.004702	0.007785	0.6643	0.939	5001	2000
GRMZM2G315072	36	46	45	156		beta.i[21797]	0.001609	0.03113	0.0006661	-0.05938	0.0008712	0.06217	5001	2000		pi.1[21797]	0.5432	0.2204	0.0037	0.007818	0.5777	0.8635	5001	2000
GRMZM2G115875	12	21	78	78		beta.i[16378]	0.0004341	0.03173	0.0005888	-0.0644	0.0002918	0.06075	5001	2000		pi.1[16378]	0.5892	0.2428	0.005578	0.00786	0.631	0.9126	5001	2000
GRMZM2G031930	26	39	44	61		beta.i[28718]	0.002124	0.03094	0.0007592	-0.05682	0.001373	0.06514	5001	2000		pi.1[28718]	0.5325	0.2314	0.005293	0.007864	0.5718	0.8646	5001	2000
GRMZM2G084208	9	15	41	175		beta.i[15994]	0.00145	0.0315	0.0006026	-0.05898	0.0009685	0.06391	5001	2000		pi.1[15994]	0.6158	0.2504	0.005741	0.007916	0.6749	0.9296	5001	2000
GRMZM2G091717	72	38	86	74		beta.i[11136]	0.001656	0.03195	0.0007177	-0.06188	0.002176	0.0635	5001	2000		pi.1[11136]	0.4995	0.2117	0.004652	0.00793	0.5255	0.8204	5001	2000
GRMZM2G154156	32	23	91	91		beta.i[12028]	0.001233	0.03168	0.0008352	-0.06074	5.954e-05	0.06297	5001	2000		pi.1[12028]	0.5365	0.2279	0.005287	0.007979	0.5741	0.8658	5001	2000
GRMZM2G480605	96	132	41	83		beta.i[27296]	0.001455	0.03104	0.0006932	-0.06075	0.001716	0.06467	5001	2000		pi.1[27296]	0.4998	0.2046	0.004981	0.00798	0.5322	0.8096	5001	2000
GRMZM2G106479	52	39	62	93		beta.i[36685]	0.001429	0.0315	0.0006558	-0.05967	0.001521	0.06265	5001	2000		pi.1[36685]	0.5172	0.2197	0.005297	0.008025	0.5494	0.8372	5001	2000
GRMZM2G105449	26	43	53	77		beta.i[40302]	0.001682	0.03065	0.0006493	-0.06126	0.002496	0.05982	5001	2000		pi.1[40302]	0.5538	0.2293	0.006284	0.008027	0.5956	0.8753	5001	2000
GRMZM2G164165	41	15	131	133		beta.i[16980]	0.00116	0.03192	0.0005937	-0.06394	0.002117	0.0639	5001	2000		pi.1[16980]	0.5219	0.2239	0.003939	0.008052	0.5593	0.8521	5001	2000
GRMZM5G876708	115	234	53	33		beta.i[14393]	0.001324	0.03135	0.000694	-0.06022	0.001924	0.06315	5001	2000		pi.1[14393]	0.4833	0.2026	0.005629	0.008061	0.5085	0.796	5001	2000
GRMZM5G800984	2	4	111	174		beta.i[34749]	0.002807	0.03133	0.000782	-0.05686	0.002613	0.06572	5001	2000		pi.1[34749]	0.7084	0.2693	0.006429	0.008117	0.7855	0.9932	5001	2000
GRMZM2G304010	40	71	28	110		beta.i[1756]	0.0006454	0.03197	0.0006931	-0.06277	0.001029	0.06205	5001	2000		pi.1[1756]	0.5206	0.2258	0.004668	0.008128	0.5574	0.8581	5001	2000
GRMZM2G373859	1693	36	225	123		beta.i[7373]	0.003359	0.03116	0.000846	-0.05781	0.003165	0.067	5001	2000		pi.1[7373]	0.3824	0.1741	0.003683	0.008168	0.3966	0.6801	5001	2000
GRMZM2G373652	75	15	124	188		beta.i[17626]	0.000771	0.03053	0.0005955	-0.06067	0.001491	0.0624	5001	2000		pi.1[17626]	0.5043	0.2121	0.004737	0.008178	0.5361	0.8271	5001	2000
GRMZM2G034638	59	91	65	41		beta.i[35862]	0.002859	0.03224	0.0006901	-0.05883	0.002912	0.0653	5001	2000		pi.1[35862]	0.5028	0.2143	0.004321	0.008187	0.5317	0.8303	5001	2000
GRMZM2G314679	22	44	62	66		beta.i[33819]	0.0004213	0.03158	0.0006733	-0.06123	0.0001379	0.06049	5001	2000		pi.1[33819]	0.5627	0.23	0.00552	0.008195	0.6059	0.8858	5001	2000
GRMZM2G144234	42	109	30	31		beta.i[11863]	-0.0001969	0.03135	0.0006541	-0.06289	-0.0009298	0.06405	5001	2000		pi.1[11863]	0.5109	0.2222	0.004965	0.008389	0.5435	0.8525	5001	2000
GRMZM5G838930	3	2	171	272		beta.i[27850]	-0.000179	0.03157	0.0005715	-0.05999	0.0004089	0.06078	5001	2000		pi.1[27850]	0.68	0.2754	0.007478	0.008434	0.7572	0.9877	5001	2000
GRMZM5G842508	40	17	93	108		beta.i[38841]	0.00017	0.03108	0.0006637	-0.06213	0.00101	0.05894	5001	2000		pi.1[38841]	0.5219	0.2199	0.005441	0.008455	0.5547	0.8493	5001	2000
GRMZM2G057698	30	40	50	69		beta.i[693]	-0.0005972	0.03139	0.0005811	-0.05933	-0.0002631	0.05938	5001	2000		pi.1[693]	0.5418	0.2251	0.005287	0.00852	0.5782	0.8693	5001	2000
GRMZM2G006144	52	43	66	98		beta.i[23804]	0.001761	0.03132	0.0006433	-0.06125	0.002286	0.06096	5001	2000		pi.1[23804]	0.5184	0.2216	0.005188	0.008541	0.5508	0.8407	5001	2000
GRMZM2G166166	45	34	76	75		beta.i[6550]	0.002387	0.03189	0.0006594	-0.05906	0.002937	0.06526	5001	2000		pi.1[6550]	0.5151	0.2157	0.005302	0.008542	0.5527	0.8389	5001	2000
GRMZM2G177461	8	13	107	78		beta.i[6745]	0.001303	0.03186	0.0008273	-0.06184	0.0009838	0.06406	5001	2000		pi.1[6745]	0.6134	0.2457	0.005664	0.008601	0.6633	0.937	5001	2000
GRMZM2G332512	58	28	107	74		beta.i[37695]	0.002614	0.03156	0.000725	-0.05862	0.002199	0.06538	5001	2000		pi.1[37695]	0.5053	0.2181	0.003984	0.008661	0.5349	0.8416	5001	2000
GRMZM2G096389	50	53	96	56		beta.i[29352]	0.0007998	0.03171	0.0006718	-0.06223	0.0009308	0.06317	5001	2000		pi.1[29352]	0.5214	0.2196	0.004127	0.008677	0.5577	0.8484	5001	2000
GRMZM2G095464	12	8	80	270		beta.i[11174]	0.001302	0.0318	0.0006185	-0.06039	0.001434	0.06305	5001	2000		pi.1[11174]	0.6033	0.2433	0.005593	0.00879	0.6562	0.9192	5001	2000
GRMZM2G176407	33	23	88	112		beta.i[33708]	0.001785	0.03072	0.0006691	-0.05862	0.002193	0.06186	5001	2000		pi.1[33708]	0.5438	0.223	0.0048	0.008859	0.5809	0.8664	5001	2000
GRMZM5G836649	57	90	47	27		beta.i[14150]	0.001459	0.03169	0.0007614	-0.06308	0.002293	0.06309	5001	2000		pi.1[14150]	0.5009	0.216	0.004455	0.008878	0.5287	0.8261	5001	2000
GRMZM2G108115	23	35	72	92		beta.i[5427]	0.001244	0.03188	0.0007553	-0.06139	0.001733	0.0623	5001	2000		pi.1[5427]	0.5654	0.2267	0.004674	0.008991	0.6045	0.882	5001	2000
AC155610.2_FG009	6	11	196	79		beta.i[14551]	0.0001505	0.03152	0.0005071	-0.06432	0.0009231	0.0629	5001	2000		pi.1[14551]	0.6383	0.2496	0.00579	0.009195	0.6959	0.9493	5001	2000
GRMZM2G044442	20	34	60	88		beta.i[28839]	0.0002217	0.02975	0.0007033	-0.05695	0.0002764	0.05845	5001	2000		pi.1[28839]	0.5677	0.2322	0.005807	0.009255	0.6125	0.8969	5001	2000
GRMZM2G147268	35	17	85	158		beta.i[11909]	0.001699	0.0318	0.0007248	-0.05923	0.001376	0.0647	5001	2000		pi.1[11909]	0.5323	0.2293	0.00553	0.009272	0.5717	0.8617	5001	2000
GRMZM2G005365	18	52	62	56		beta.i[23791]	0.0003801	0.03223	0.0006811	-0.06117	0.0006043	0.06311	5001	2000		pi.1[23791]	0.5697	0.2315	0.004726	0.009278	0.6142	0.9001	5001	2000
GRMZM5G872443	13	18	73	92		beta.i[23272]	0.00233	0.0311	0.0006262	-0.05747	0.001979	0.06631	5001	2000		pi.1[23272]	0.5911	0.2377	0.004703	0.009331	0.6331	0.9093	5001	2000
GRMZM2G018837	93	38	95	131		beta.i[19535]	0.002002	0.03151	0.0007665	-0.05793	0.00217	0.0642	5001	2000		pi.1[19535]	0.4939	0.2118	0.004954	0.009402	0.5313	0.813	5001	2000
GRMZM2G093944	7	5	158	153		beta.i[40179]	0.0005151	0.03164	0.0007399	-0.06011	0.0006968	0.06463	5001	2000		pi.1[40179]	0.6355	0.2517	0.005878	0.009402	0.6927	0.9447	5001	2000
GRMZM2G095969	25	29	86	55		beta.i[11177]	0.0007179	0.03141	0.0007426	-0.05844	0.0003526	0.06367	5001	2000		pi.1[11177]	0.5485	0.2296	0.005622	0.009449	0.588	0.8779	5001	2000
GRMZM2G142409	12	42	72	47		beta.i[29860]	0.001109	0.03161	0.0007088	-0.05863	0.001062	0.0628	5001	2000		pi.1[29860]	0.585	0.2409	0.004358	0.009456	0.6352	0.9083	5001	2000
GRMZM2G048503	169	58	91	75		beta.i[10472]	0.003031	0.03204	0.0006712	-0.05801	0.002523	0.06684	5001	2000		pi.1[10472]	0.4623	0.2016	0.003593	0.009482	0.4856	0.7832	5001	2000
GRMZM2G002286	5	27	64	91		beta.i[19303]	0.0008027	0.03112	0.0007839	-0.05999	0.0003827	0.06141	5001	2000		pi.1[19303]	0.6601	0.254	0.006828	0.009499	0.7256	0.9641	5001	2000
GRMZM2G441565	55	36	77	69		beta.i[30895]	-1.164e-05	0.03093	0.000744	-0.06137	0.0008172	0.05906	5001	2000		pi.1[30895]	0.5074	0.2139	0.004608	0.009593	0.5387	0.8388	5001	2000
AC207656.3_FG002	9	8	153	158		beta.i[23571]	0.002177	0.03154	0.0005057	-0.06125	0.003047	0.06269	5001	2000		pi.1[23571]	0.6236	0.2436	0.004693	0.009632	0.6802	0.9311	5001	2000
GRMZM2G363704	25	28	49	91		beta.i[17558]	0.000942	0.03139	0.0006435	-0.0597	0.001153	0.0631	5001	2000		pi.1[17558]	0.5482	0.2338	0.005664	0.009637	0.5913	0.8807	5001	2000
GRMZM2G089222	2	4	131	173		beta.i[32878]	0.0005759	0.032	0.0007663	-0.06203	0.0008134	0.06548	5001	2000		pi.1[32878]	0.7247	0.2635	0.006456	0.009687	0.8058	0.9955	5001	2000
GRMZM2G054028	29	37	50	75		beta.i[28935]	0.001048	0.03146	0.0006306	-0.06244	0.0008457	0.06336	5001	2000		pi.1[28935]	0.5411	0.2345	0.004709	0.009693	0.5817	0.8783	5001	2000
GRMZM2G173863	120	59	54	159		beta.i[33684]	0.001923	0.03149	0.0007193	-0.06384	0.002158	0.06327	5001	2000		pi.1[33684]	0.486	0.2041	0.00487	0.009794	0.5168	0.7988	5001	2000
GRMZM2G400749	27	31	71	84		beta.i[7555]	0.0009414	0.03163	0.0006696	-0.0618	0.001728	0.06328	5001	2000		pi.1[7555]	0.558	0.2308	0.005921	0.009884	0.5913	0.8821	5001	2000
GRMZM2G439578	10	17	65	103		beta.i[17955]	0.000627	0.03235	0.0006923	-0.06321	0.0006257	0.06504	5001	2000		pi.1[17955]	0.6098	0.25	0.00568	0.009887	0.6618	0.9307	5001	2000
GRMZM2G414569	40	45	76	90		beta.i[26932]	0.001127	0.03142	0.0006276	-0.06107	0.0008527	0.06436	5001	2000		pi.1[26932]	0.5403	0.2175	0.004333	0.009915	0.5761	0.8565	5001	2000
GRMZM2G165963	4	8	136	104		beta.i[6545]	0.002095	0.03174	0.0007305	-0.05879	0.002251	0.06555	5001	2000		pi.1[6545]	0.6828	0.2582	0.007122	0.01002	0.7451	0.9854	5001	2000
GRMZM2G135770	18	6	192	246		beta.i[21100]	0.001546	0.03097	0.0006298	-0.05868	0.001678	0.06271	5001	2000		pi.1[21100]	0.5697	0.2331	0.004623	0.01007	0.6083	0.8969	5001	2000
GRMZM2G446515	31	28	67	119		beta.i[34369]	0.001229	0.03095	0.0007047	-0.05929	0.00107	0.06077	5001	2000		pi.1[34369]	0.5531	0.2238	0.004764	0.01007	0.5926	0.8692	5001	2000
GRMZM2G140160	75	125	40	58		beta.i[11818]	0.002303	0.03132	0.0008584	-0.05699	0.001805	0.0638	5001	2000		pi.1[11818]	0.4934	0.2113	0.004425	0.0101	0.522	0.8224	5001	2000
GRMZM2G373717	9	16	70	130		beta.i[30601]	0.0009909	0.03157	0.0006863	-0.06077	0.000948	0.06243	5001	2000		pi.1[30601]	0.6177	0.2444	0.006099	0.01011	0.6666	0.9355	5001	2000
GRMZM2G046459	96	25	57	245		beta.i[24336]	0.001535	0.03055	0.0005891	-0.05777	0.001555	0.05967	5001	2000		pi.1[24336]	0.4849	0.2082	0.004587	0.01014	0.5096	0.807	5001	2000
GRMZM2G338160	6	29	19	493		beta.i[17408]	0.001836	0.03264	0.0006935	-0.06213	0.002186	0.06883	5001	2000		pi.1[17408]	0.6566	0.25	0.006008	0.0102	0.7127	0.9601	5001	2000
HSP18	73	18	213	67		beta.i[42396]	0.001486	0.03202	0.0007238	-0.0614	0.002372	0.0666	5001	2000		pi.1[42396]	0.4768	0.2162	0.005168	0.01021	0.5062	0.8135	5001	2000
RpoT	17	26	73	50		beta.i[40418]	-0.0001316	0.03139	0.0006796	-0.05995	0.0002908	0.06212	5001	2000		pi.1[40418]	0.5595	0.2403	0.005748	0.01026	0.6062	0.8941	5001	2000
GRMZM2G122805	18	38	57	56		beta.i[25437]	0.001249	0.03128	0.0007377	-0.058	0.0008593	0.06363	5001	2000		pi.1[25437]	0.5681	0.2342	0.005028	0.01033	0.6074	0.8893	5001	2000
GRMZM2G474326	71	23	122	104		beta.i[18134]	0.002411	0.03124	0.0005377	-0.05912	0.003212	0.06387	5001	2000		pi.1[18134]	0.495	0.2128	0.004776	0.01034	0.5296	0.8202	5001	2000
GRMZM2G588961	142	176	29	27		beta.i[22913]	0.002795	0.03128	0.0008416	-0.05982	0.0028	0.06489	5001	2000		pi.1[22913]	0.4573	0.2057	0.004958	0.01034	0.4862	0.7738	5001	2000
GRMZM5G864133	59	33	96	59		beta.i[42226]	0.001501	0.03165	0.0006924	-0.06047	0.0009498	0.06439	5001	2000		pi.1[42226]	0.499	0.2162	0.005031	0.01034	0.5285	0.8359	5001	2000
GRMZM2G055020	30	55	53	77		beta.i[28944]	0.00112	0.03121	0.0007341	-0.0595	0.00127	0.06328	5001	2000		pi.1[28944]	0.5482	0.2263	0.004509	0.01035	0.5858	0.8724	5001	2000
GRMZM2G003663	8	11	76	129		beta.i[19321]	0.001105	0.0316	0.0006541	-0.06125	0.001998	0.06318	5001	2000		pi.1[19321]	0.6171	0.2545	0.005365	0.01037	0.6737	0.9416	5001	2000
GRMZM2G460012	47	37	75	95		beta.i[8026]	0.0009541	0.03164	0.0007149	-0.06062	0.0003773	0.06366	5001	2000		pi.1[8026]	0.5266	0.2207	0.005743	0.0104	0.5594	0.852	5001	2000
GRMZM5G827348	47	17	142	99		beta.i[14091]	0.0007951	0.03078	0.0006226	-0.05957	0.001136	0.06287	5001	2000		pi.1[14091]	0.5102	0.2223	0.005885	0.01044	0.5455	0.8511	5001	2000
GRMZM2G319842	2	2	290	174		beta.i[12567]	0.000611	0.03225	0.00072	-0.06193	0.000951	0.06642	5001	2000		pi.1[12567]	0.6908	0.2691	0.006683	0.01061	0.7666	0.9912	5001	2000
GRMZM5G829926	2	3	152	245		beta.i[18643]	0.001487	0.03221	0.0007055	-0.06144	0.001691	0.06349	5001	2000		pi.1[18643]	0.7113	0.2643	0.00618	0.01064	0.7862	0.9926	5001	2000
GRMZM5G824405	61	14	119	158		beta.i[8806]	0.001139	0.03179	0.000701	-0.06021	0.001024	0.06225	5001	2000		pi.1[8806]	0.505	0.2164	0.00505	0.01067	0.5325	0.8349	5001	2000
AC203424.3_FG001	7	20	64	76		beta.i[35289]	0.0007782	0.03226	0.0006666	-0.06271	0.001315	0.06245	5001	2000		pi.1[35289]	0.6321	0.2516	0.005612	0.01071	0.6855	0.9485	5001	2000
GRMZM2G070603	6	21	186	30		beta.i[39968]	0.0008022	0.03073	0.0006415	-0.05981	0.00113	0.05929	5001	2000		pi.1[39968]	0.6203	0.2556	0.006922	0.01075	0.68	0.9452	5001	2000
GRMZM2G021725	37	30	101	76		beta.i[403]	0.000373	0.03229	0.0007032	-0.06102	0.0006421	0.06417	5001	2000		pi.1[403]	0.5345	0.2249	0.004718	0.01086	0.5644	0.8638	5001	2000
GRMZM2G180622	66	35	115	129		beta.i[17172]	0.002858	0.0323	0.0007647	-0.06131	0.002531	0.06696	5001	2000		pi.1[17172]	0.52	0.2046	0.004205	0.01091	0.5475	0.8262	5001	2000
GRMZM2G061578	89	29	102	95		beta.i[10662]	0.001394	0.0312	0.0007838	-0.06058	0.001616	0.0616	5001	2000		pi.1[10662]	0.4893	0.2076	0.004985	0.01094	0.5132	0.8089	5001	2000
GRMZM2G002894	114	43	81	129		beta.i[31988]	0.002331	0.03123	0.0005913	-0.05854	0.001996	0.0635	5001	2000		pi.1[31988]	0.4886	0.2055	0.004475	0.01095	0.5184	0.8094	5001	2000
GRMZM2G338696	60	25	108	101		beta.i[37727]	0.001724	0.03171	0.0008112	-0.0618	0.002165	0.06236	5001	2000		pi.1[37727]	0.509	0.2143	0.004138	0.01095	0.537	0.8318	5001	2000
a4	34	17	95	203		beta.i[17119]	0.002373	0.03073	0.0006511	-0.05775	0.001985	0.06296	5001	2000		pi.1[17119]	0.5511	0.2229	0.00531	0.0112	0.5903	0.8629	5001	2000
GRMZM2G135256	19	21	99	111		beta.i[33318]	0.0009476	0.03223	0.0006609	-0.06279	0.001493	0.06298	5001	2000		pi.1[33318]	0.5817	0.231	0.006062	0.01128	0.6267	0.8978	5001	2000
GRMZM2G050364	4	35	43	131		beta.i[36027]	0.001516	0.03093	0.0007162	-0.0594	0.001995	0.06147	5001	2000		pi.1[36027]	0.6748	0.2594	0.005274	0.01128	0.743	0.977	5001	2000
GRMZM2G162768	119	12	150	318		beta.i[16965]	-0.0008278	0.03118	0.0007455	-0.06171	-0.00113	0.06206	5001	2000		pi.1[16965]	0.4765	0.2064	0.004723	0.0113	0.504	0.8017	5001	2000
GRMZM2G011491	35	36	82	63		beta.i[35571]	0.0009602	0.03184	0.0008411	-0.06104	0.000343	0.06284	5001	2000		pi.1[35571]	0.532	0.2286	0.004928	0.01132	0.5733	0.8563	5001	2000
GRMZM5G869350	20	25	60	101		beta.i[14334]	0.0002244	0.03237	0.0007121	-0.06256	8.115e-05	0.06086	5001	2000		pi.1[14334]	0.5685	0.2314	0.006874	0.01136	0.609	0.8881	5001	2000
GRMZM2G082853	26	26	101	102		beta.i[11000]	0.000572	0.03216	0.0008078	-0.0626	0.001042	0.0659	5001	2000		pi.1[11000]	0.5649	0.2283	0.004764	0.01138	0.61	0.8791	5001	2000
GRMZM2G078941	42	48	51	79		beta.i[36356]	0.001173	0.03181	0.0006818	-0.06141	0.001278	0.06675	5001	2000		pi.1[36356]	0.5176	0.2206	0.005617	0.01141	0.5504	0.8364	5001	2000
GRMZM2G049216	28	41	51	70		beta.i[4319]	0.0008431	0.03182	0.000724	-0.06184	0.001138	0.06119	5001	2000		pi.1[4319]	0.5494	0.226	0.004538	0.01144	0.5884	0.8725	5001	2000
GRMZM2G151516	31	12	161	183		beta.i[21292]	0.002014	0.0307	0.0006625	-0.05904	0.002266	0.06236	5001	2000		pi.1[21292]	0.5464	0.2271	0.004659	0.0115	0.5845	0.8671	5001	2000
GRMZM2G116971	73	61	54	106		beta.i[5628]	0.001439	0.03196	0.0006365	-0.06126	0.001034	0.06352	5001	2000		pi.1[5628]	0.5081	0.2099	0.005415	0.01157	0.5381	0.819	5001	2000
AC149818.2_FG008	13	14	79	123		beta.i[39103]	0.0001754	0.03203	0.0007674	-0.06048	0.0003972	0.06513	5001	2000		pi.1[39103]	0.5899	0.2397	0.005569	0.01164	0.6406	0.9043	5001	2000
GRMZM2G169931	9	26	102	62		beta.i[6604]	0.001607	0.03202	0.0008896	-0.06068	0.002012	0.06501	5001	2000		pi.1[6604]	0.614	0.2446	0.005903	0.01168	0.6611	0.9356	5001	2000
GRMZM2G433579	5	45	31	85		beta.i[7807]	0.0007558	0.03217	0.0007718	-0.06381	0.0006128	0.06719	5001	2000		pi.1[7807]	0.6509	0.2585	0.006072	0.01178	0.7143	0.9662	5001	2000
GRMZM2G077187	20	73	36	40		beta.i[36338]	0.001746	0.03181	0.0007858	-0.06163	0.00111	0.06424	5001	2000		pi.1[36338]	0.5457	0.2377	0.00509	0.01184	0.5884	0.8859	5001	2000
GRMZM2G459702	17	57	53	77		beta.i[34415]	0.001235	0.03112	0.0007331	-0.05773	0.0009831	0.06214	5001	2000		pi.1[34415]	0.5865	0.229	0.004777	0.01196	0.6286	0.8947	5001	2000
AC207051.3_FG004	233	138	38	60		beta.i[23561]	0.003374	0.03097	0.0009294	-0.05716	0.003227	0.06326	5001	2000		pi.1[23561]	0.4553	0.1945	0.004053	0.01198	0.4817	0.7636	5001	2000
FEN1	33	63	72	35		beta.i[29609]	0.001961	0.03169	0.0007884	-0.05927	0.002106	0.0624	5001	2000		pi.1[29609]	0.5378	0.2252	0.004338	0.01201	0.5711	0.8609	5001	2000
GRMZM2G024811	43	48	82	29		beta.i[433]	0.001924	0.03199	0.0005666	-0.06252	0.001197	0.06517	5001	2000		pi.1[433]	0.512	0.2234	0.004638	0.01203	0.5459	0.8473	5001	2000
GRMZM5G852325	121	89	67	64		beta.i[34946]	-4.277e-05	0.03219	0.0007139	-0.06499	-2.426e-05	0.06505	5001	2000		pi.1[34946]	0.4861	0.2	0.004831	0.01203	0.5133	0.7998	5001	2000
GRMZM2G163418	28	21	173	69		beta.i[12161]	0.0007125	0.03142	0.0007254	-0.06097	0.0007153	0.06334	5001	2000		pi.1[12161]	0.5531	0.2273	0.006213	0.01205	0.5944	0.8744	5001	2000
GRMZM2G469477	61	49	70	97		beta.i[13512]	0.001136	0.03135	0.0007908	-0.05929	0.001081	0.06373	5001	2000		pi.1[13512]	0.5212	0.2098	0.004935	0.01215	0.5474	0.8384	5001	2000
GRMZM2G481373	22	28	71	77		beta.i[2366]	0.0008525	0.03195	0.0006026	-0.06297	0.0006142	0.06265	5001	2000		pi.1[2366]	0.5629	0.2327	0.006143	0.01216	0.6063	0.8826	5001	2000
psbZ	43	225	48	9		beta.i[26935]	0.001446	0.03259	0.0007363	-0.06306	0.001826	0.06351	5001	2000		pi.1[26935]	0.4911	0.2183	0.005554	0.0122	0.5191	0.8284	5001	2000
GRMZM2G031782	53	70	37	79		beta.i[496]	0.002614	0.0317	0.0007743	-0.05997	0.002955	0.06457	5001	2000		pi.1[496]	0.5119	0.2163	0.004321	0.01226	0.5435	0.8339	5001	2000
GRMZM5G831313	2	8	95	144		beta.i[8861]	0.000967	0.03186	0.0006667	-0.05925	0.001238	0.06185	5001	2000		pi.1[8861]	0.7196	0.2651	0.006365	0.01232	0.801	0.9916	5001	2000
GRMZM2G475362	3	8	91	122		beta.i[18141]	0.0004553	0.03172	0.0007482	-0.05951	0.0017	0.06091	5001	2000		pi.1[18141]	0.707	0.2579	0.006669	0.01239	0.7795	0.9864	5001	2000
GRMZM5G876252	131	145	39	69		beta.i[23283]	0.0002102	0.03139	0.000558	-0.06093	-0.0003191	0.06204	5001	2000		pi.1[23283]	0.4874	0.2077	0.004846	0.01241	0.5208	0.8097	5001	2000
GRMZM2G443833	3	10	50	131		beta.i[2239]	-7.579e-05	0.03098	0.000708	-0.05866	-0.0001194	0.06226	5001	2000		pi.1[2239]	0.6923	0.2675	0.007282	0.01248	0.7693	0.9905	5001	2000
GRMZM2G092286	91	84	49	49		beta.i[29301]	0.001093	0.03192	0.0007146	-0.06097	0.001908	0.06257	5001	2000		pi.1[29301]	0.4857	0.2131	0.004152	0.01248	0.5161	0.8099	5001	2000
GRMZM2G106921	5	3	278	243		beta.i[11357]	0.0007579	0.03151	0.0007217	-0.06297	0.0004539	0.06175	5001	2000		pi.1[11357]	0.6553	0.2532	0.005099	0.01253	0.7167	0.9661	5001	2000
GRMZM2G031065	33	16	127	135		beta.i[3934]	0.0004198	0.03198	0.000713	-0.06175	0.000979	0.06164	5001	2000		pi.1[3934]	0.5355	0.2261	0.004995	0.01254	0.5719	0.86	5001	2000
GRMZM2G114461	12	12	98	146		beta.i[33123]	0.0008652	0.03304	0.0008409	-0.06405	0.0004897	0.06387	5001	2000		pi.1[33123]	0.5988	0.2404	0.005307	0.01254	0.6423	0.9166	5001	2000
GRMZM5G863602	6	24	30	156		beta.i[42224]	0.001165	0.03101	0.0005949	-0.05856	0.001898	0.06229	5001	2000		pi.1[42224]	0.6495	0.2557	0.007208	0.01255	0.7146	0.9591	5001	2000
GRMZM2G126765	47	185	32	34		beta.i[20990]	-0.0001713	0.03105	0.0007819	-0.05874	-0.000662	0.0636	5001	2000		pi.1[20990]	0.5145	0.2161	0.004849	0.01256	0.5481	0.845	5001	2000
GRMZM5G876003	115	81	61	61		beta.i[23280]	0.002073	0.03229	0.0006526	-0.06078	0.002024	0.06615	5001	2000		pi.1[23280]	0.4921	0.2041	0.004116	0.01258	0.5166	0.8025	5001	2000
GRMZM2G359365	71	41	91	72		beta.i[30545]	0.001217	0.03179	0.000774	-0.06084	0.001104	0.06336	5001	2000		pi.1[30545]	0.503	0.2149	0.00529	0.01268	0.5401	0.8269	5001	2000
GRMZM2G455122	26	29	60	133		beta.i[13424]	0.002056	0.03125	0.000731	-0.05777	0.003203	0.06135	5001	2000		pi.1[13424]	0.5587	0.2234	0.004801	0.01269	0.596	0.8716	5001	2000
GRMZM2G076276	5	26	40	124		beta.i[24730]	0.001068	0.03272	0.0007533	-0.06243	0.0002168	0.06595	5001	2000		pi.1[24730]	0.6693	0.249	0.006869	0.0127	0.7354	0.9712	5001	2000
GRMZM2G407044	18	37	39	132		beta.i[22253]	0.0009567	0.03198	0.0007213	-0.06695	0.0009873	0.0624	5001	2000		pi.1[22253]	0.575	0.2377	0.005816	0.01274	0.622	0.9012	5001	2000
AC203986.3_FG013	238	26	188	120		beta.i[31870]	0.001627	0.03101	0.0006804	-0.05663	0.001594	0.06205	5001	2000		pi.1[31870]	0.4486	0.1959	0.004762	0.01277	0.4652	0.7798	5001	2000
GRMZM2G404126	116	84	36	71		beta.i[17780]	0.000477	0.03104	0.0007775	-0.05989	0.0009472	0.06033	5001	2000		pi.1[17780]	0.4825	0.2097	0.004619	0.0128	0.5102	0.8086	5001	2000
GRMZM2G392320	23	36	66	145		beta.i[26817]	0.0007554	0.03171	0.0006617	-0.05938	0.0005017	0.06256	5001	2000		pi.1[26817]	0.5836	0.2209	0.004566	0.0128	0.6245	0.888	5001	2000
GRMZM2G175280	17	48	38	102		beta.i[6700]	0.002123	0.03118	0.000735	-0.05635	0.001472	0.06579	5001	2000		pi.1[6700]	0.5826	0.2359	0.004836	0.01282	0.6304	0.9065	5001	2000
GRMZM2G104288	5	24	55	58		beta.i[1066]	0.000657	0.03212	0.0007317	-0.06178	-0.0007669	0.06478	5001	2000		pi.1[1066]	0.6545	0.2578	0.006847	0.01288	0.7189	0.9666	5001	2000
GRMZM2G065073	25	17	73	396		beta.i[10725]	0.000367	0.03136	0.0006656	-0.06175	5.942e-05	0.062	5001	2000		pi.1[10725]	0.5794	0.2246	0.004411	0.01288	0.6219	0.8928	5001	2000
GRMZM2G149617	32	21	79	89		beta.i[16781]	0.002347	0.03047	0.0007021	-0.05843	0.003078	0.05951	5001	2000		pi.1[16781]	0.5391	0.2272	0.005467	0.01291	0.5739	0.8666	5001	2000
GRMZM5G878725	23	112	39	51		beta.i[2837]	0.003301	0.0313	0.000725	-0.05809	0.003091	0.06486	5001	2000		pi.1[2837]	0.555	0.229	0.005334	0.01293	0.5995	0.8864	5001	2000
GRMZM2G106233	28	35	83	86		beta.i[29463]	0.0004452	0.03199	0.0006762	-0.05998	0.0007758	0.06573	5001	2000		pi.1[29463]	0.5576	0.2209	0.004642	0.01295	0.5947	0.8755	5001	2000
GRMZM2G536430	82	134	29	21		beta.i[18316]	0.001415	0.03222	0.0008296	-0.06202	0.001421	0.06611	5001	2000		pi.1[18316]	0.4706	0.217	0.004713	0.01304	0.4939	0.8156	5001	2000
GRMZM2G106420	58	39	77	78		beta.i[20691]	0.002328	0.03184	0.0007339	-0.05937	0.00247	0.06572	5001	2000		pi.1[20691]	0.5138	0.2161	0.004954	0.01305	0.5441	0.8359	5001	2000
GRMZM2G360688	12	39	61	69		beta.i[34002]	0.0006221	0.033	0.0009632	-0.06409	-8.939e-05	0.0651	5001	2000		pi.1[34002]	0.5968	0.2385	0.005355	0.01305	0.6442	0.9171	5001	2000
GRMZM2G151955	181	23	146	151		beta.i[6264]	0.002545	0.03224	0.0006118	-0.06054	0.002808	0.0656	5001	2000		pi.1[6264]	0.4593	0.1999	0.005694	0.01307	0.4784	0.7809	5001	2000
GRMZM2G496115	45	43	68	81		beta.i[27331]	0.001181	0.03181	0.0007269	-0.05852	0.0003419	0.06431	5001	2000		pi.1[27331]	0.5321	0.2158	0.005278	0.01319	0.5611	0.8543	5001	2000
GRMZM2G008430	17	17	152	75		beta.i[35539]	0.001258	0.03193	0.0007182	-0.06229	0.001043	0.06259	5001	2000		pi.1[35539]	0.578	0.2368	0.006083	0.01319	0.6183	0.8976	5001	2000
GRMZM2G159477	38	49	77	55		beta.i[6428]	0.001232	0.03209	0.0008258	-0.06015	0.00109	0.06306	5001	2000		pi.1[6428]	0.5317	0.2205	0.005107	0.01324	0.5651	0.8519	5001	2000
GRMZM2G050674	81	178	33	33		beta.i[28897]	0.001347	0.0316	0.0007005	-0.06213	0.001898	0.06044	5001	2000		pi.1[28897]	0.4896	0.208	0.004462	0.01329	0.5192	0.8089	5001	2000
GRMZM2G305426	42	41	76	110		beta.i[21744]	0.002026	0.03283	0.0007413	-0.06274	0.002342	0.06669	5001	2000		pi.1[21744]	0.5366	0.2243	0.005373	0.01332	0.5723	0.8665	5001	2000
GRMZM5G862831	119	181	46	34		beta.i[27993]	0.001463	0.03167	0.0007259	-0.05861	-0.000284	0.06423	5001	2000		pi.1[27993]	0.4755	0.2033	0.004092	0.01338	0.4999	0.7934	5001	2000
GRMZM2G174975	127	25	172	148		beta.i[17104]	0.002559	0.03131	0.0007061	-0.05891	0.00274	0.06496	5001	2000		pi.1[17104]	0.4804	0.2013	0.004525	0.01343	0.5023	0.8022	5001	2000
AC210205.3_FG008	54	58	85	33		beta.i[14745]	0.0003252	0.03312	0.0007702	-0.06647	0.0005574	0.06322	5001	2000		pi.1[14745]	0.5088	0.2141	0.004677	0.01345	0.5365	0.838	5001	2000
GRMZM2G030325	2	4	100	157		beta.i[28705]	0.0004184	0.03204	0.0006733	-0.0632	0.0002704	0.06471	5001	2000		pi.1[28705]	0.713	0.2778	0.005919	0.01345	0.8	0.9946	5001	2000
GRMZM5G834734	83	102	48	61		beta.i[27821]	0.001646	0.03194	0.0007453	-0.06136	0.0008691	0.06252	5001	2000		pi.1[27821]	0.5017	0.2102	0.005791	0.01346	0.53	0.8283	5001	2000
GRMZM2G081912	8	14	56	67		beta.i[15959]	0.0003726	0.0321	0.0007241	-0.06105	-0.0003944	0.0638	5001	2000		pi.1[15959]	0.6087	0.2538	0.00518	0.01348	0.6597	0.9419	5001	2000
GRMZM2G095541	24	51	84	48		beta.i[36550]	0.0009508	0.03154	0.0006002	-0.0577	0.0001982	0.06536	5001	2000		pi.1[36550]	0.56	0.2262	0.004884	0.01348	0.5972	0.8808	5001	2000
GRMZM2G149977	2	7	176	123		beta.i[25859]	7.099e-05	0.03193	0.000718	-0.06133	-0.0001373	0.06393	5001	2000		pi.1[25859]	0.7147	0.2667	0.007263	0.01354	0.7945	0.9923	5001	2000
GRMZM2G150697	42	82	103	29		beta.i[6245]	0.00179	0.03173	0.0006488	-0.06349	0.002329	0.0628	5001	2000		pi.1[6245]	0.5319	0.2156	0.005154	0.01358	0.5689	0.8557	5001	2000
GRMZM5G891282	149	29	160	100		beta.i[23351]	0.001549	0.03162	0.0007951	-0.0588	0.001878	0.06419	5001	2000		pi.1[23351]	0.4678	0.2023	0.004339	0.01363	0.4875	0.7853	5001	2000
KIN3	28	27	100	97		beta.i[37488]	0.001521	0.03187	0.0008172	-0.05908	0.001001	0.06512	5001	2000		pi.1[37488]	0.5573	0.2255	0.005011	0.0137	0.5968	0.8759	5001	2000
GRMZM2G091540	17	81	42	65		beta.i[16089]	0.0001327	0.03182	0.0006565	-0.06373	0.001082	0.06199	5001	2000		pi.1[16089]	0.5807	0.2267	0.004844	0.01378	0.6252	0.89	5001	2000
GRMZM2G142836	60	26	107	98		beta.i[16709]	0.0004876	0.03145	0.0007408	-0.06163	0.0007697	0.05873	5001	2000		pi.1[16709]	0.5133	0.2123	0.004517	0.01386	0.5438	0.8274	5001	2000
GRMZM2G415837	15	21	65	130		beta.i[7662]	0.00151	0.0315	0.0007389	-0.05847	0.001623	0.06434	5001	2000		pi.1[7662]	0.5981	0.2329	0.00511	0.01402	0.6486	0.9094	5001	2000
GRMZM2G043056	9	9	110	128		beta.i[19833]	0.0005409	0.03235	0.0007136	-0.06372	-0.0001136	0.06303	5001	2000		pi.1[19833]	0.6203	0.2417	0.005252	0.01406	0.6712	0.9384	5001	2000
GRMZM5G898796	63	23	96	97		beta.i[42394]	0.002216	0.03227	0.0007351	-0.05876	0.001936	0.06281	5001	2000		pi.1[42394]	0.4984	0.2217	0.004907	0.0141	0.5304	0.827	5001	2000
GRMZM2G002043	17	31	69	90		beta.i[9734]	0.001762	0.03205	0.0007663	-0.06282	0.002888	0.06585	5001	2000		pi.1[9734]	0.5816	0.2337	0.004481	0.01415	0.6256	0.9007	5001	2000
GRMZM2G128740	17	38	56	59		beta.i[40547]	0.001474	0.03119	0.0007518	-0.05923	0.001347	0.06578	5001	2000		pi.1[40547]	0.5649	0.2374	0.006082	0.01421	0.6135	0.8934	5001	2000
GRMZM2G055578	3	3	161	180		beta.i[15578]	0.00145	0.03138	0.0007519	-0.06032	0.001591	0.06177	5001	2000		pi.1[15578]	0.6823	0.2745	0.007544	0.01424	0.7564	0.9889	5001	2000
GRMZM2G075092	41	41	62	73		beta.i[36308]	0.001368	0.03238	0.0007416	-0.06245	0.0008887	0.06454	5001	2000		pi.1[36308]	0.5295	0.2225	0.005358	0.01426	0.569	0.8465	5001	2000
GRMZM2G006071	16	37	89	64		beta.i[32015]	0.001158	0.03209	0.0007543	-0.06157	0.001569	0.06346	5001	2000		pi.1[32015]	0.5882	0.2322	0.005614	0.0143	0.6328	0.9036	5001	2000
GRMZM2G028855	111	101	49	74		beta.i[39558]	0.001337	0.03137	0.0006462	-0.06231	0.001817	0.0632	5001	2000		pi.1[39558]	0.4899	0.206	0.004238	0.01435	0.5209	0.8001	5001	2000
GRMZM2G009196	29	29	34	214		beta.i[302]	0.0005291	0.03137	0.0006947	-0.06051	0.0009386	0.06229	5001	2000		pi.1[302]	0.5534	0.2236	0.004672	0.01437	0.5885	0.8683	5001	2000
GRMZM2G102639	43	46	133	47		beta.i[25111]	0.0009662	0.03102	0.0006686	-0.05896	0.0001074	0.06286	5001	2000		pi.1[25111]	0.5227	0.214	0.004202	0.01439	0.5549	0.8351	5001	2000
GRMZM5G848541	34	26	85	102		beta.i[2733]	0.001756	0.0314	0.0007101	-0.05958	0.001926	0.06434	5001	2000		pi.1[2733]	0.5483	0.2202	0.004322	0.01443	0.5857	0.8692	5001	2000
GRMZM2G040090	43	61	34	96		beta.i[32369]	0.001448	0.03133	0.0007796	-0.05968	0.001645	0.06571	5001	2000		pi.1[32369]	0.5204	0.2217	0.005456	0.01455	0.5554	0.849	5001	2000
GRMZM2G463462	29	20	92	119		beta.i[30989]	0.00127	0.03153	0.0007659	-0.06104	0.001927	0.064	5001	2000		pi.1[30989]	0.5473	0.2266	0.004813	0.01457	0.5821	0.8665	5001	2000
GRMZM2G149903	50	24	56	132		beta.i[6231]	0.0004171	0.0332	0.0006599	-0.06542	0.0001652	0.06691	5001	2000		pi.1[6231]	0.5154	0.2185	0.005623	0.01458	0.5464	0.8449	5001	2000
GRMZM2G073235	106	23	86	186		beta.i[36279]	0.0009601	0.03143	0.0007019	-0.06032	0.0002812	0.06248	5001	2000		pi.1[36279]	0.4867	0.2037	0.004167	0.0146	0.5113	0.8093	5001	2000
GRMZM5G865084	4	3	273	226		beta.i[23233]	0.0001762	0.03243	0.0008705	-0.06408	-0.0002201	0.06265	5001	2000		pi.1[23233]	0.6745	0.2597	0.005059	0.01465	0.7395	0.9809	5001	2000
GRMZM2G064254	5	5	193	144		beta.i[20107]	0.001027	0.03076	0.0007247	-0.0586	0.001168	0.06119	5001	2000		pi.1[20107]	0.6576	0.2586	0.005968	0.01468	0.7255	0.973	5001	2000
GRMZM5G844723	10	13	112	89		beta.i[42152]	0.0008801	0.03122	0.0007235	-0.0599	8.589e-05	0.06411	5001	2000		pi.1[42152]	0.605	0.2495	0.005258	0.01468	0.6585	0.9242	5001	2000
GRMZM5G897033	78	28	111	214		beta.i[23384]	0.002078	0.03131	0.0008308	-0.05871	0.002234	0.06374	5001	2000		pi.1[23384]	0.5123	0.2089	0.004708	0.01472	0.5398	0.8246	5001	2000
GRMZM2G337845	21	43	74	44		beta.i[12690]	0.0001479	0.03236	0.0008153	-0.06626	0.0009227	0.0625	5001	2000		pi.1[12690]	0.5557	0.2284	0.005862	0.01479	0.5934	0.881	5001	2000
GRMZM2G059039	13	35	69	63		beta.i[20040]	0.001981	0.03091	0.0007197	-0.05822	0.001134	0.06396	5001	2000		pi.1[20040]	0.5943	0.2361	0.005883	0.01494	0.6469	0.91	5001	2000
AC187157.4_FG002	46	45	82	52		beta.i[35160]	0.002438	0.03195	0.0005825	-0.06067	0.002455	0.06665	5001	2000		pi.1[35160]	0.5249	0.2158	0.004724	0.01497	0.5577	0.8482	5001	2000
GRMZM2G446881	11	13	118	125		beta.i[27110]	0.0009821	0.03135	0.0006768	-0.05896	0.001521	0.06223	5001	2000		pi.1[27110]	0.6149	0.2344	0.005214	0.01499	0.6638	0.9254	5001	2000
GRMZM2G062531	50	77	27	129		beta.i[15690]	0.001055	0.03081	0.0008572	-0.05966	0.001325	0.06269	5001	2000		pi.1[15690]	0.5122	0.2152	0.004758	0.01501	0.5442	0.8388	5001	2000
GRMZM5G882821	33	47	55	88		beta.i[9255]	0.0006252	0.03182	0.0007772	-0.06298	0.0004826	0.06246	5001	2000		pi.1[9255]	0.5533	0.2215	0.005266	0.01502	0.5889	0.8763	5001	2000
AC233922.1_FG004	12	35	53	81		beta.i[19267]	0.00143	0.03094	0.0006926	-0.05939	0.001729	0.0645	5001	2000		pi.1[19267]	0.5958	0.2411	0.006844	0.01503	0.6444	0.914	5001	2000
GRMZM5G867878	217	96	51	104		beta.i[28026]	0.001371	0.03113	0.000753	-0.05886	0.001391	0.06173	5001	2000		pi.1[28026]	0.4628	0.1976	0.00436	0.01504	0.4841	0.7752	5001	2000
GRMZM2G029471	165	137	67	10		beta.i[19670]	0.0013	0.03162	0.0007913	-0.06297	0.001509	0.06251	5001	2000		pi.1[19670]	0.4464	0.2	0.004936	0.01509	0.4702	0.7718	5001	2000
GRMZM2G152396	7	58	68	24		beta.i[40765]	0.0004543	0.03155	0.0006014	-0.06053	1.911e-05	0.06148	5001	2000		pi.1[40765]	0.6165	0.2546	0.006894	0.01515	0.6748	0.9414	5001	2000
GRMZM5G881294	26	29	60	133		beta.i[14425]	0.001461	0.03239	0.0007781	-0.06133	0.0008369	0.06589	5001	2000		pi.1[14425]	0.5587	0.229	0.004126	0.01518	0.6074	0.88	5001	2000
GRMZM2G126235	27	80	42	74		beta.i[36914]	0.002321	0.03199	0.0006924	-0.06123	0.002344	0.06482	5001	2000		pi.1[36914]	0.5568	0.222	0.004987	0.01527	0.5996	0.875	5001	2000
APRL6	48	37	57	78		beta.i[1375]	0.002316	0.0306	0.0005663	-0.05735	0.00144	0.06433	5001	2000		pi.1[1375]	0.5118	0.222	0.004396	0.01533	0.545	0.842	5001	2000
GRMZM2G027860	2	5	94	164		beta.i[39545]	0.0005049	0.03234	0.0007117	-0.06447	0.0008738	0.06201	5001	2000		pi.1[39545]	0.7127	0.2721	0.006825	0.01538	0.794	0.9939	5001	2000
GRMZM5G886765	40	38	74	63		beta.i[14454]	0.0005289	0.03068	0.000688	-0.05842	0.0002346	0.06076	5001	2000		pi.1[14454]	0.5196	0.2213	0.005425	0.01542	0.5522	0.8566	5001	2000
GRMZM2G025975	20	23	85	104		beta.i[24067]	0.0005508	0.03185	0.0006668	-0.06193	0.0001904	0.06239	5001	2000		pi.1[24067]	0.5837	0.2294	0.004557	0.01542	0.6337	0.8982	5001	2000
GRMZM2G122841	28	61	52	48		beta.i[33203]	0.00133	0.03197	0.0006874	-0.0631	0.001745	0.06637	5001	2000		pi.1[33203]	0.5433	0.2247	0.005109	0.01542	0.5789	0.8622	5001	2000
GRMZM2G370175	48	11	172	189		beta.i[17607]	0.001176	0.03155	0.0006652	-0.05876	-6.549e-05	0.06161	5001	2000		pi.1[17607]	0.517	0.2173	0.004904	0.01551	0.5402	0.8422	5001	2000
GRMZM2G146173	13	25	63	104		beta.i[33446]	0.0004576	0.03161	0.0006	-0.06197	-9.749e-05	0.06389	5001	2000		pi.1[33446]	0.6014	0.2401	0.006259	0.01553	0.6544	0.9191	5001	2000
GRMZM2G370356	53	110	30	60		beta.i[37857]	0.001416	0.03121	0.0007302	-0.06005	0.001448	0.06273	5001	2000		pi.1[37857]	0.5124	0.2153	0.004427	0.01555	0.5413	0.8308	5001	2000
GRMZM2G173978	25	33	83	124		beta.i[26206]	0.002361	0.03137	0.0007603	-0.05679	0.001867	0.06639	5001	2000		pi.1[26206]	0.5637	0.2214	0.004204	0.01557	0.6008	0.8849	5001	2000
GRMZM2G008193	63	97	72	47		beta.i[9829]	0.0008858	0.03281	0.0008062	-0.06145	0.002196	0.06483	5001	2000		pi.1[9829]	0.5196	0.2096	0.005254	0.01559	0.5493	0.8362	5001	2000
GRMZM2G011662	19	20	82	117		beta.i[28525]	0.001065	0.03278	0.0008377	-0.06198	0.001984	0.06399	5001	2000		pi.1[28525]	0.5659	0.2324	0.00503	0.01561	0.6131	0.8849	5001	2000
GRMZM5G812774	14	37	60	87		beta.i[42024]	0.002141	0.03189	0.0007034	-0.05834	0.0008788	0.06564	5001	2000		pi.1[42024]	0.5995	0.2332	0.00589	0.01565	0.6513	0.908	5001	2000
GRMZM2G139744	118	57	52	71		beta.i[6043]	0.0005781	0.0318	0.0007189	-0.0637	0.0001047	0.06292	5001	2000		pi.1[6043]	0.4704	0.2038	0.003513	0.01566	0.488	0.7873	5001	2000
cycD2	20	16	129	82		beta.i[20267]	-0.0004295	0.03172	0.0006697	-0.06224	-0.0002765	0.06317	5001	2000		pi.1[20267]	0.5527	0.2374	0.00561	0.01566	0.5914	0.8894	5001	2000
GRMZM2G091435	25	47	57	76		beta.i[36505]	0.00203	0.03061	0.0007995	-0.05766	0.00197	0.06104	5001	2000		pi.1[36505]	0.5555	0.2233	0.005169	0.01567	0.597	0.8751	5001	2000
GRMZM2G445100	12	18	63	157		beta.i[17984]	0.001262	0.03106	0.0006594	-0.05827	0.00112	0.06472	5001	2000		pi.1[17984]	0.6041	0.243	0.00612	0.01573	0.6557	0.9188	5001	2000
GRMZM2G004014	73	32	77	113		beta.i[14881]	0.002095	0.03263	0.0009003	-0.05983	0.002523	0.06559	5001	2000		pi.1[14881]	0.499	0.2155	0.004928	0.01574	0.5323	0.8346	5001	2000
GRMZM2G144155	6	17	31	261		beta.i[6122]	0.001758	0.03167	0.0006211	-0.05911	0.001409	0.06351	5001	2000		pi.1[6122]	0.6539	0.2593	0.006729	0.0158	0.722	0.964	5001	2000
GRMZM2G035008	16	18	129	103		beta.i[15289]	0.001714	0.03164	0.000502	-0.06027	0.002279	0.06261	5001	2000		pi.1[15289]	0.5925	0.2305	0.004219	0.01582	0.6437	0.9041	5001	2000
GRMZM2G011523	21	91	28	67		beta.i[14967]	0.002067	0.03092	0.0006683	-0.05641	0.002374	0.0613	5001	2000		pi.1[14967]	0.5559	0.2329	0.004708	0.01583	0.5931	0.8843	5001	2000
GRMZM2G423861	4	29	35	176		beta.i[2154]	0.0005856	0.03146	0.000804	-0.05839	-0.0004048	0.06565	5001	2000		pi.1[2154]	0.6741	0.2583	0.007874	0.01584	0.7395	0.9737	5001	2000
GRMZM2G064984	28	75	38	47		beta.i[10724]	0.002355	0.03099	0.0006236	-0.05876	0.001946	0.06322	5001	2000		pi.1[10724]	0.5349	0.2262	0.00419	0.01587	0.5709	0.8679	5001	2000
GRMZM2G107163	17	17	140	125		beta.i[5386]	-1.856e-05	0.03136	0.000603	-0.0627	0.0002474	0.06007	5001	2000		pi.1[5386]	0.5895	0.2284	0.00669	0.0159	0.6353	0.9055	5001	2000
GRMZM2G525632	218	60	69	154		beta.i[27405]	0.002332	0.03089	0.0006885	-0.05732	0.001833	0.06325	5001	2000		pi.1[27405]	0.4669	0.1958	0.003769	0.01593	0.4921	0.7765	5001	2000
GRMZM2G085550	37	11	124	169		beta.i[16019]	0.001241	0.03182	0.0006884	-0.05941	0.0008817	0.06605	5001	2000		pi.1[16019]	0.539	0.2248	0.004255	0.01604	0.5723	0.8687	5001	2000
GRMZM2G046658	27	43	42	68		beta.i[4261]	0.001504	0.03163	0.0006603	-0.0597	0.001001	0.0636	5001	2000		pi.1[4261]	0.5415	0.2317	0.005141	0.01606	0.5797	0.8748	5001	2000
GRMZM2G030578	32	41	75	62		beta.i[32272]	0.001416	0.03092	0.0006066	-0.05995	0.001855	0.06133	5001	2000		pi.1[32272]	0.5321	0.2279	0.004871	0.01606	0.5638	0.8641	5001	2000
AC213099.3_FG001	9	10	135	111		beta.i[3226]	-4.611e-06	0.03133	0.0007548	-0.06154	0.0006572	0.0585	5001	2000		pi.1[3226]	0.6211	0.2459	0.006271	0.01611	0.6836	0.934	5001	2000
GRMZM2G115705	4	11	122	56		beta.i[11487]	0.00159	0.03126	0.0006058	-0.05842	0.001619	0.06404	5001	2000		pi.1[11487]	0.6598	0.2646	0.005858	0.01616	0.7223	0.977	5001	2000
GRMZM5G873295	44	37	72	84		beta.i[23273]	0.0007059	0.03196	0.0006495	-0.06091	1.581e-05	0.06512	5001	2000		pi.1[23273]	0.529	0.2194	0.00464	0.01623	0.5617	0.8574	5001	2000
GRMZM2G080979	18	9	128	225		beta.i[24797]	-1.795e-05	0.03178	0.0006792	-0.06142	-0.0002026	0.06275	5001	2000		pi.1[24797]	0.578	0.2315	0.006111	0.01623	0.6184	0.8934	5001	2000
GRMZM2G143655	22	63	56	54		beta.i[6115]	0.0009245	0.03179	0.0006241	-0.06265	0.000572	0.06614	5001	2000		pi.1[6115]	0.5638	0.2257	0.004815	0.01627	0.6008	0.8847	5001	2000
GRMZM2G505019	3	4	147	188		beta.i[34545]	0.0007216	0.03134	0.0008343	-0.06062	0.002116	0.06234	5001	2000		pi.1[34545]	0.7	0.2661	0.006373	0.01632	0.7765	0.9871	5001	2000
GRMZM5G852856	213	140	27	93		beta.i[42183]	0.001749	0.03121	0.0007724	-0.06079	0.001634	0.06218	5001	2000		pi.1[42183]	0.4612	0.1974	0.003481	0.01632	0.4842	0.7713	5001	2000
GRMZM2G168269	21	45	51	48		beta.i[33638]	0.0003904	0.03163	0.0006484	-0.06055	0.0001036	0.06384	5001	2000		pi.1[33638]	0.5527	0.2306	0.004697	0.01635	0.5922	0.8827	5001	2000
GRMZM2G017411	36	33	101	73		beta.i[19515]	0.001482	0.03113	0.0007005	-0.05968	7.929e-05	0.06204	5001	2000		pi.1[19515]	0.544	0.2198	0.004187	0.0165	0.5792	0.8615	5001	2000
GRMZM2G420865	22	31	131	48		beta.i[13223]	0.0009259	0.03206	0.000667	-0.06261	0.002421	0.0614	5001	2000		pi.1[13223]	0.5592	0.2266	0.005154	0.01654	0.5994	0.8887	5001	2000
GRMZM2G163247	70	100	55	52		beta.i[21453]	0.001619	0.03089	0.0007496	-0.05763	0.001984	0.0635	5001	2000		pi.1[21453]	0.5112	0.2054	0.004747	0.01654	0.5447	0.8223	5001	2000
GRMZM2G046088	37	34	105	88		beta.i[15431]	0.001328	0.03205	0.000642	-0.06186	0.0009746	0.06276	5001	2000		pi.1[15431]	0.5441	0.2164	0.004872	0.01661	0.5752	0.8585	5001	2000
GRMZM2G073427	249	35	123	70		beta.i[4752]	0.001964	0.03124	0.0006759	-0.0599	0.002961	0.06081	5001	2000		pi.1[4752]	0.449	0.1928	0.004654	0.01664	0.4716	0.7642	5001	2000
GRMZM2G703928	38	59	71	85		beta.i[8609]	-0.0001773	0.03241	0.0006635	-0.06319	-0.0001175	0.06421	5001	2000		pi.1[8609]	0.5497	0.2207	0.004627	0.01668	0.6015	0.8579	5001	2000
GRMZM2G329885	17	10	117	178		beta.i[12644]	0.00168	0.03155	0.0009142	-0.06074	0.001352	0.06398	5001	2000		pi.1[12644]	0.5732	0.2361	0.003907	0.01668	0.6126	0.8984	5001	2000
GRMZM2G030402	31	62	87	24		beta.i[19683]	-3.684e-06	0.03197	0.0007482	-0.06282	0.000127	0.06334	5001	2000		pi.1[19683]	0.5342	0.2232	0.004901	0.01674	0.5634	0.8615	5001	2000
GRMZM2G154394	15	24	72	102		beta.i[21331]	0.00129	0.032	0.0008373	-0.06389	0.001448	0.0629	5001	2000		pi.1[21331]	0.5913	0.2399	0.005488	0.01678	0.6405	0.9016	5001	2000
GRMZM2G114841	117	8	177	457		beta.i[5580]	0.0006283	0.03153	0.0007668	-0.06022	0.001101	0.0594	5001	2000		pi.1[5580]	0.4772	0.206	0.004761	0.01682	0.5043	0.7935	5001	2000
GRMZM2G027344	166	28	130	123		beta.i[32234]	0.001028	0.03155	0.0008232	-0.06038	0.001122	0.064	5001	2000		pi.1[32234]	0.4598	0.1994	0.004937	0.01683	0.4803	0.7781	5001	2000
GRMZM2G089565	17	17	90	107		beta.i[932]	0.002411	0.03062	0.0006453	-0.05754	0.002453	0.06241	5001	2000		pi.1[932]	0.5859	0.234	0.00521	0.0169	0.6327	0.9004	5001	2000
GRMZM2G062988	16	30	66	64		beta.i[4563]	-0.0007013	0.0312	0.000666	-0.0625	-0.0002071	0.05922	5001	2000		pi.1[4563]	0.5789	0.2351	0.005638	0.01692	0.623	0.8988	5001	2000
AC225205.3_FG003	5	5	167	128		beta.i[31935]	0.001158	0.03149	0.0006988	-0.05843	0.001494	0.06299	5001	2000		pi.1[31935]	0.6556	0.2575	0.004972	0.01701	0.7241	0.9698	5001	2000
GRMZM2G096480	43	36	72	75		beta.i[20540]	0.002977	0.03098	0.0006284	-0.05989	0.003269	0.06309	5001	2000		pi.1[20540]	0.5249	0.2206	0.005173	0.01702	0.5615	0.8474	5001	2000
GRMZM5G849275	57	150	28	42		beta.i[31538]	0.001525	0.0304	0.0007473	-0.05748	0.001429	0.06003	5001	2000		pi.1[31538]	0.5041	0.2162	0.004836	0.01704	0.5356	0.8374	5001	2000
GRMZM2G400470	29	51	39	77		beta.i[41414]	0.001752	0.03097	0.0007234	-0.05825	0.001933	0.06444	5001	2000		pi.1[41414]	0.54	0.2312	0.004708	0.01704	0.5795	0.8677	5001	2000
GRMZM2G061277	14	14	128	109		beta.i[39892]	0.0001455	0.03275	0.0007316	-0.06428	0.0008923	0.06499	5001	2000		pi.1[39892]	0.5915	0.2391	0.005842	0.01706	0.6393	0.9069	5001	2000
GRMZM2G004320	50	36	72	77		beta.i[14886]	0.001719	0.03226	0.0007909	-0.06118	0.001994	0.06536	5001	2000		pi.1[14886]	0.5128	0.2142	0.004486	0.01707	0.5415	0.8384	5001	2000
GRMZM5G849211	10	13	106	102		beta.i[27909]	0.000942	0.03111	0.0007942	-0.05918	0.00132	0.06153	5001	2000		pi.1[27909]	0.6076	0.2428	0.005397	0.01722	0.6614	0.9303	5001	2000
GRMZM2G161202	501	53	149	72		beta.i[16940]	0.001175	0.03176	0.0007456	-0.06194	0.001443	0.06203	5001	2000		pi.1[16940]	0.4216	0.1825	0.004297	0.01724	0.4394	0.7298	5001	2000
GRMZM2G313649	28	41	38	64		beta.i[26385]	0.0003418	0.03162	0.0007239	-0.06167	0.0005174	0.06285	5001	2000		pi.1[26385]	0.5375	0.2275	0.004822	0.01727	0.5772	0.8695	5001	2000
LKRSDH	11	12	81	141		beta.i[21692]	0.002657	0.03147	0.0007853	-0.0568	0.00263	0.06808	5001	2000		pi.1[21692]	0.6086	0.2426	0.005268	0.01728	0.66	0.9266	5001	2000
GRMZM2G059037	8	25	56	61		beta.i[28972]	0.001654	0.0322	0.0007473	-0.0584	0.001534	0.0641	5001	2000		pi.1[28972]	0.6164	0.2475	0.006506	0.01728	0.6806	0.9319	5001	2000
GRMZM2G025236	20	30	55	102		beta.i[24060]	0.002293	0.03081	0.0006997	-0.05719	0.001489	0.06384	5001	2000		pi.1[24060]	0.5646	0.2345	0.005728	0.01729	0.6019	0.8935	5001	2000
GRMZM2G129266	49	59	38	167		beta.i[5857]	0.001953	0.03152	0.0007588	-0.0578	0.002216	0.06317	5001	2000		pi.1[5857]	0.5307	0.215	0.005638	0.01732	0.5604	0.8474	5001	2000
GRMZM2G165355	40	19	213	136		beta.i[40869]	0.001374	0.03141	0.0007506	-0.05922	0.001058	0.06367	5001	2000		pi.1[40869]	0.5493	0.2123	0.005765	0.01732	0.5871	0.8534	5001	2000
GRMZM2G021129	57	37	118	91		beta.i[10025]	0.0008423	0.03305	0.0006752	-0.06172	0.00121	0.06412	5001	2000		pi.1[10025]	0.5248	0.2141	0.00474	0.0174	0.5619	0.8407	5001	2000
GRMZM2G049536	31	42	93	41		beta.i[10488]	0.0002527	0.03145	0.0007902	-0.06093	0.0008802	0.05934	5001	2000		pi.1[10488]	0.5338	0.2211	0.005597	0.01741	0.5707	0.8594	5001	2000
GRMZM2G325168	14	9	131	160		beta.i[41133]	0.0007137	0.03227	0.0007338	-0.0618	0.0007142	0.06629	5001	2000		pi.1[41133]	0.5923	0.2358	0.004626	0.01742	0.6369	0.9126	5001	2000
GRMZM2G093098	14	12	124	117		beta.i[16118]	0.0001655	0.03265	0.0009909	-0.06181	0.0002366	0.06576	5001	2000		pi.1[16118]	0.5892	0.2358	0.005417	0.01746	0.639	0.9062	5001	2000
GRMZM2G076810	25	69	53	115		beta.i[20291]	0.001508	0.03186	0.0008818	-0.06122	0.00127	0.0626	5001	2000		pi.1[20291]	0.57	0.2259	0.005202	0.01747	0.6023	0.8852	5001	2000
GRMZM2G000818	19	13	176	174		beta.i[31972]	0.001369	0.0317	0.0007445	-0.05771	0.001716	0.06334	5001	2000		pi.1[31972]	0.5787	0.2345	0.005388	0.01748	0.6228	0.8942	5001	2000
GRMZM2G012179	31	88	45	73		beta.i[23875]	0.002396	0.03067	0.0007692	-0.06007	0.002613	0.06326	5001	2000		pi.1[23875]	0.542	0.2252	0.00505	0.01749	0.5764	0.8737	5001	2000
GRMZM2G022856	27	38	67	116		beta.i[15125]	7.263e-05	0.03148	0.0007693	-0.06228	0.0003852	0.06219	5001	2000		pi.1[15125]	0.5661	0.2248	0.004819	0.01758	0.6033	0.8829	5001	2000
GRMZM5G855776	118	15	168	231		beta.i[9042]	0.0005436	0.03135	0.0008396	-0.06228	0.0005615	0.06235	5001	2000		pi.1[9042]	0.4833	0.2104	0.005395	0.0176	0.5037	0.8072	5001	2000
GRMZM2G494514	24	39	51	78		beta.i[27324]	0.002102	0.03154	0.000759	-0.05868	0.001874	0.06459	5001	2000		pi.1[27324]	0.5529	0.2291	0.005134	0.01762	0.5907	0.8773	5001	2000
GRMZM2G104375	36	49	73	44		beta.i[20645]	-2.597e-05	0.03126	0.0006487	-0.06073	0.000225	0.06249	5001	2000		pi.1[20645]	0.5319	0.2223	0.004989	0.0178	0.5672	0.853	5001	2000
GRMZM2G096662	4	3	199	205		beta.i[29354]	0.001395	0.03082	0.0006554	-0.05613	0.001098	0.06343	5001	2000		pi.1[29354]	0.6647	0.2661	0.006959	0.01782	0.7328	0.9798	5001	2000
GRMZM2G147943	5	4	174	189		beta.i[6192]	0.001452	0.03154	0.0007296	-0.0584	0.0005805	0.06277	5001	2000		pi.1[6192]	0.6632	0.2523	0.005284	0.01797	0.7263	0.9638	5001	2000
GRMZM2G500150	168	174	41	31		beta.i[34534]	0.001368	0.0321	0.0008207	-0.06133	0.001019	0.06384	5001	2000		pi.1[34534]	0.4657	0.2012	0.00532	0.01803	0.4924	0.7785	5001	2000
GRMZM2G177072	19	22	93	70		beta.i[1670]	0.0004981	0.03059	0.0006555	-0.06182	0.0002998	0.06201	5001	2000		pi.1[1670]	0.5696	0.2332	0.005532	0.01814	0.61	0.8919	5001	2000
GRMZM2G148925	7	21	63	55		beta.i[6207]	0.001391	0.03197	0.0008193	-0.05838	0.001441	0.0636	5001	2000		pi.1[6207]	0.6302	0.2516	0.005537	0.01815	0.6882	0.9449	5001	2000
GRMZM2G320703	15	38	91	35		beta.i[33842]	0.0001649	0.03169	0.000544	-0.06373	0.0001323	0.0648	5001	2000		pi.1[33842]	0.5758	0.2343	0.005561	0.01816	0.6176	0.9058	5001	2000
GRMZM2G084727	63	19	76	231		beta.i[36427]	0.0008716	0.03191	0.0006342	-0.06186	0.001063	0.0635	5001	2000		pi.1[36427]	0.5082	0.2151	0.004994	0.01816	0.5303	0.832	5001	2000
GRMZM2G116646	12	12	70	120		beta.i[16395]	0.0006645	0.03102	0.0006663	-0.06106	0.0002441	0.06307	5001	2000		pi.1[16395]	0.5897	0.2424	0.006141	0.01818	0.6319	0.9139	5001	2000
GRMZM2G006069	24	46	52	76		beta.i[19358]	0.002044	0.03263	0.000891	-0.06416	0.003273	0.0667	5001	2000		pi.1[19358]	0.5631	0.2249	0.005075	0.01824	0.597	0.8796	5001	2000
GRMZM2G106523	5	13	67	122		beta.i[16272]	0.001727	0.03113	0.0008502	-0.05988	0.002574	0.0617	5001	2000		pi.1[16272]	0.6713	0.2607	0.007129	0.01826	0.742	0.9696	5001	2000
GRMZM2G091503	54	25	77	145		beta.i[20479]	0.001398	0.03135	0.0007812	-0.05913	0.001321	0.06335	5001	2000		pi.1[20479]	0.5251	0.2154	0.004953	0.01827	0.555	0.8432	5001	2000
GRMZM2G348675	41	41	86	70		beta.i[21960]	0.003141	0.03061	0.0005672	-0.05713	0.002514	0.06432	5001	2000		pi.1[21960]	0.5328	0.2165	0.005178	0.01832	0.5646	0.851	5001	2000
GRMZM2G412846	5	6	119	178		beta.i[7626]	0.0002798	0.0314	0.0007267	-0.06031	4.892e-05	0.06149	5001	2000		pi.1[7626]	0.6615	0.259	0.006139	0.01834	0.7278	0.9651	5001	2000
pk8-b	17	26	77	88		beta.i[10116]	0.0007545	0.03126	0.0007201	-0.06115	0.001254	0.06126	5001	2000		pi.1[10116]	0.5785	0.2337	0.004665	0.01837	0.6242	0.8978	5001	2000
GRMZM2G064767	25	73	58	63		beta.i[36191]	0.001605	0.03124	0.0007599	-0.05939	0.0009512	0.06314	5001	2000		pi.1[36191]	0.5615	0.2281	0.005045	0.01838	0.6052	0.8809	5001	2000
GRMZM5G883392	154	139	44	48		beta.i[31688]	0.001848	0.03117	0.0007134	-0.05723	0.0007595	0.06478	5001	2000		pi.1[31688]	0.4686	0.1969	0.003319	0.01842	0.4912	0.7852	5001	2000
GRMZM2G014397	64	20	107	127		beta.i[344]	0.002102	0.03159	0.0005463	-0.05897	0.00161	0.06626	5001	2000		pi.1[344]	0.5067	0.2146	0.004158	0.01846	0.5328	0.8341	5001	2000
GRMZM2G334165	12	52	54	48		beta.i[33897]	0.0009122	0.03149	0.0006297	-0.06083	-2.108e-06	0.06231	5001	2000		pi.1[33897]	0.6041	0.2385	0.005342	0.01846	0.6529	0.9193	5001	2000
GRMZM2G056373	21	30	99	76		beta.i[4426]	0.001972	0.03179	0.000643	-0.0616	0.002751	0.06406	5001	2000		pi.1[4426]	0.5691	0.2298	0.004187	0.0185	0.6187	0.8908	5001	2000
GRMZM2G172581	8	21	72	74		beta.i[6651]	0.0007723	0.03217	0.0007527	-0.06147	-0.0002456	0.06242	5001	2000		pi.1[6651]	0.6112	0.2495	0.006326	0.01853	0.6664	0.9396	5001	2000
GRMZM2G088974	27	50	55	101		beta.i[928]	0.001354	0.03163	0.0006865	-0.06167	0.001115	0.06453	5001	2000		pi.1[928]	0.554	0.2253	0.004692	0.0187	0.6005	0.8657	5001	2000
GRMZM2G376067	16	43	57	40		beta.i[26703]	0.0008558	0.03115	0.0006552	-0.05894	0.0005721	0.0615	5001	2000		pi.1[26703]	0.5607	0.2413	0.005047	0.01871	0.6067	0.8921	5001	2000
GRMZM2G463471	13	103	29	73		beta.i[22529]	0.001959	0.03215	0.0007836	-0.06121	0.00259	0.06577	5001	2000		pi.1[22529]	0.5813	0.2369	0.005267	0.01874	0.6205	0.9088	5001	2000
GRMZM2G141818	24	35	85	72		beta.i[29850]	0.002005	0.03122	0.0007026	-0.05883	0.002694	0.06418	5001	2000		pi.1[29850]	0.5645	0.2275	0.005314	0.01874	0.6058	0.8799	5001	2000
GRMZM2G088134	162	144	24	60		beta.i[24906]	0.001668	0.03167	0.0005701	-0.05838	0.001867	0.06491	5001	2000		pi.1[24906]	0.4507	0.2039	0.003992	0.01877	0.4692	0.7843	5001	2000
GRMZM2G151519	9	13	75	195		beta.i[21293]	0.001724	0.03142	0.0008423	-0.06037	0.002754	0.0615	5001	2000		pi.1[21293]	0.6212	0.2455	0.005167	0.01878	0.6756	0.9366	5001	2000
GRMZM2G545891	13	26	87	46		beta.i[41855]	-0.0001562	0.03108	0.0006551	-0.06089	-0.0002116	0.062	5001	2000		pi.1[41855]	0.5766	0.2379	0.005805	0.01878	0.6229	0.9041	5001	2000
GRMZM2G016649	8	12	43	241		beta.i[9963]	0.00116	0.03239	0.0009217	-0.06333	0.001785	0.06289	5001	2000		pi.1[9963]	0.6274	0.2486	0.006094	0.01881	0.679	0.9485	5001	2000
GRMZM2G027495	62	34	106	100		beta.i[24095]	0.002313	0.03132	0.0007686	-0.06112	0.002928	0.06472	5001	2000		pi.1[24095]	0.5236	0.207	0.004447	0.01881	0.5566	0.839	5001	2000
GRMZM2G127416	39	22	107	100		beta.i[1254]	0.001017	0.03163	0.0007295	-0.06184	0.001512	0.06161	5001	2000		pi.1[1254]	0.5344	0.2172	0.004918	0.01882	0.5669	0.86	5001	2000
GRMZM2G414844	96	117	39	55		beta.i[30783]	0.002258	0.03103	0.0006365	-0.0616	0.001998	0.06023	5001	2000		pi.1[30783]	0.4886	0.2051	0.004879	0.01882	0.5084	0.8132	5001	2000
GRMZM2G042208	32	46	75	75		beta.i[24284]	0.003098	0.03088	0.0007225	-0.05998	0.003745	0.06374	5001	2000		pi.1[24284]	0.5413	0.2249	0.005295	0.01893	0.5732	0.8622	5001	2000
GRMZM2G052880	50	34	105	160		beta.i[24409]	0.001732	0.03115	0.0006819	-0.05897	0.001678	0.06315	5001	2000		pi.1[24409]	0.5291	0.2175	0.005073	0.01896	0.5691	0.8392	5001	2000
GRMZM2G429714	4	4	121	316		beta.i[30842]	0.0003749	0.03138	0.0007097	-0.06161	0.0009341	0.06352	5001	2000		pi.1[30842]	0.6888	0.2514	0.005672	0.01896	0.752	0.9819	5001	2000
GRMZM2G103873	340	127	82	70		beta.i[5334]	0.001521	0.03132	0.0007093	-0.0567	0.002314	0.06163	5001	2000		pi.1[5334]	0.4537	0.1859	0.003973	0.01899	0.47	0.7599	5001	2000
GRMZM2G306703	214	40	127	107		beta.i[37590]	0.001073	0.03143	0.0005836	-0.05992	0.0007789	0.06272	5001	2000		pi.1[37590]	0.4639	0.1899	0.004217	0.019	0.4879	0.7696	5001	2000
GRMZM2G499390	37	92	42	70		beta.i[38387]	0.001589	0.03139	0.0006604	-0.05795	0.001814	0.06354	5001	2000		pi.1[38387]	0.538	0.2219	0.006101	0.01902	0.5759	0.8567	5001	2000
GRMZM2G071370	13	36	47	80		beta.i[32701]	0.001098	0.0316	0.0006907	-0.06125	0.001155	0.06531	5001	2000		pi.1[32701]	0.5862	0.2423	0.004829	0.01903	0.6437	0.9167	5001	2000
GRMZM2G128574	42	27	117	85		beta.i[29693]	0.001509	0.03198	0.0005986	-0.0596	0.0008794	0.06376	5001	2000		pi.1[29693]	0.535	0.2189	0.004881	0.01905	0.5679	0.8585	5001	2000
GRMZM2G140763	20	28	35	133		beta.i[29833]	0.001855	0.03185	0.000783	-0.06207	0.002324	0.06238	5001	2000		pi.1[29833]	0.5664	0.2325	0.005241	0.01906	0.6122	0.8897	5001	2000
GRMZM2G328304	31	20	96	128		beta.i[17354]	0.0005916	0.0318	0.0006957	-0.06074	-5.402e-05	0.06441	5001	2000		pi.1[17354]	0.5523	0.2212	0.004787	0.01914	0.5879	0.8715	5001	2000
GRMZM2G099780	31	33	82	101		beta.i[11235]	0.001786	0.03085	0.000694	-0.05769	0.002074	0.06302	5001	2000		pi.1[11235]	0.5552	0.2194	0.005194	0.01916	0.5954	0.8675	5001	2000
GRMZM2G090190	30	37	92	87		beta.i[24940]	0.002373	0.03167	0.0006624	-0.06075	0.002424	0.06552	5001	2000		pi.1[24940]	0.545	0.2275	0.005313	0.01917	0.5856	0.8616	5001	2000
GRMZM2G165567	11	21	62	72		beta.i[37370]	0.001115	0.03173	0.0008055	-0.06166	0.0005803	0.06344	5001	2000		pi.1[37370]	0.5974	0.2441	0.00506	0.01924	0.6422	0.9276	5001	2000
GRMZM2G113002	30	42	60	85		beta.i[5530]	0.0009576	0.03198	0.0006412	-0.0622	0.0004053	0.06316	5001	2000		pi.1[5530]	0.5455	0.225	0.005192	0.01927	0.5831	0.8673	5001	2000
AC204277.3_FG006	176	67	66	106		beta.i[35301]	0.001875	0.0319	0.0007043	-0.0637	0.001651	0.06356	5001	2000		pi.1[35301]	0.4746	0.1987	0.004066	0.01928	0.4976	0.7874	5001	2000
GRMZM2G581240	322	114	49	49		beta.i[2540]	0.001815	0.0314	0.0007786	-0.05942	0.002315	0.06349	5001	2000		pi.1[2540]	0.4371	0.1934	0.003712	0.01931	0.458	0.7522	5001	2000
GRMZM2G153863	55	106	48	39		beta.i[37238]	0.00155	0.03119	0.000631	-0.05938	0.0002735	0.06551	5001	2000		pi.1[37238]	0.5105	0.2115	0.004007	0.01935	0.546	0.8292	5001	2000
GRMZM2G098167	180	89	115	45		beta.i[25047]	0.001987	0.03183	0.000795	-0.06116	0.002673	0.06554	5001	2000		pi.1[25047]	0.4706	0.1931	0.004566	0.01937	0.4974	0.781	5001	2000
GRMZM2G459828	11	42	67	53		beta.i[22513]	1.216e-05	0.03181	0.0007859	-0.06139	8.981e-05	0.06277	5001	2000		pi.1[22513]	0.6007	0.2391	0.005537	0.01939	0.6503	0.916	5001	2000
GRMZM2G066400	50	45	86	67		beta.i[29065]	0.002298	0.03204	0.0006274	-0.06207	0.002852	0.06582	5001	2000		pi.1[29065]	0.5234	0.2203	0.004603	0.01939	0.5587	0.8463	5001	2000
GRMZM2G083128	177	69	58	59		beta.i[4949]	0.001769	0.03155	0.0007362	-0.05914	0.00212	0.06431	5001	2000		pi.1[4949]	0.4579	0.2	0.003479	0.01941	0.487	0.7815	5001	2000
GRMZM5G882815	53	35	99	54		beta.i[23318]	0.001145	0.03164	0.0008046	-0.06004	0.001706	0.06292	5001	2000		pi.1[23318]	0.513	0.2156	0.004205	0.01944	0.5429	0.8409	5001	2000
GRMZM2G481604	31	25	61	107		beta.i[27298]	0.0007649	0.03147	0.0006625	-0.06346	0.001439	0.06308	5001	2000		pi.1[27298]	0.535	0.2312	0.004415	0.01944	0.5663	0.869	5001	2000
GRMZM2G167164	3	14	45	160		beta.i[17019]	0.001353	0.0312	0.0006263	-0.05839	0.0009796	0.06411	5001	2000		pi.1[17019]	0.6947	0.2679	0.0059	0.01956	0.7754	0.988	5001	2000
GRMZM2G464976	12	26	113	66		beta.i[18081]	0.001997	0.03085	0.0008022	-0.05824	0.002248	0.06255	5001	2000		pi.1[18081]	0.602	0.2373	0.005768	0.01958	0.645	0.9165	5001	2000
GRMZM2G120373	22	30	78	84		beta.i[20865]	0.0006486	0.03152	0.0005806	-0.06166	0.0004168	0.06248	5001	2000		pi.1[20865]	0.5643	0.2279	0.005538	0.01963	0.599	0.8857	5001	2000
GRMZM2G159828	21	29	67	80		beta.i[12110]	0.001924	0.03151	0.000701	-0.05716	0.002079	0.06287	5001	2000		pi.1[12110]	0.5695	0.2299	0.005864	0.01966	0.6116	0.889	5001	2000
GRMZM2G151245	33	8	217	202		beta.i[37206]	0.003056	0.03061	0.0006829	-0.05556	0.002927	0.06424	5001	2000		pi.1[37206]	0.5404	0.2226	0.00495	0.01966	0.5664	0.8606	5001	2000
GRMZM2G073180	214	31	127	142		beta.i[15846]	0.002116	0.03164	0.0008037	-0.06026	0.002123	0.06432	5001	2000		pi.1[15846]	0.4573	0.1945	0.00419	0.01971	0.4758	0.7723	5001	2000
GRMZM2G473104	9	5	181	194		beta.i[41700]	0.0002779	0.03168	0.0006625	-0.06193	0.0005966	0.06405	5001	2000		pi.1[41700]	0.6222	0.241	0.005628	0.01972	0.6689	0.937	5001	2000
GRMZM2G122392	29	28	82	105		beta.i[20890]	0.001061	0.03135	0.0008797	-0.05893	0.0004558	0.0634	5001	2000		pi.1[20890]	0.5572	0.2221	0.004885	0.01975	0.5938	0.871	5001	2000
GRMZM2G098622	18	52	69	62		beta.i[11218]	0.0008633	0.03159	0.0008297	-0.0612	0.0008017	0.06136	5001	2000		pi.1[11218]	0.5781	0.2276	0.004404	0.01981	0.6168	0.8976	5001	2000
ndhG	179	107	62	29		beta.i[12671]	0.001335	0.031	0.000744	-0.05989	0.001362	0.06235	5001	2000		pi.1[12671]	0.4598	0.1954	0.004582	0.01982	0.4821	0.7757	5001	2000
GRMZM2G129189	4	40	50	116		beta.i[25556]	0.000432	0.03187	0.0007239	-0.06002	0.0001419	0.06332	5001	2000		pi.1[25556]	0.6877	0.2507	0.006965	0.01988	0.7549	0.9785	5001	2000
AC211738.4_FG003	10	5	188	291		beta.i[39238]	0.0004591	0.03168	0.0006366	-0.05934	0.0001521	0.06091	5001	2000		pi.1[39238]	0.6115	0.2421	0.005574	0.01991	0.6708	0.927	5001	2000
GRMZM2G110862	28	36	41	77		beta.i[40369]	-2.774e-06	0.03251	0.0008555	-0.06583	0.000307	0.06268	5001	2000		pi.1[40369]	0.5369	0.2242	0.00385	0.01993	0.5748	0.8696	5001	2000
GRMZM2G020843	34	33	127	131		beta.i[10015]	-0.0004333	0.03137	0.0007571	-0.06292	5.338e-05	0.06069	5001	2000		pi.1[10015]	0.5555	0.2154	0.004318	0.02008	0.5949	0.8717	5001	2000
GRMZM2G066456	30	50	76	90		beta.i[20133]	0.002677	0.03246	0.0006864	-0.06328	0.00356	0.06694	5001	2000		pi.1[20133]	0.5566	0.2184	0.005477	0.02008	0.5958	0.8752	5001	2000
GRMZM2G057491	35	22	110	92		beta.i[39838]	0.001488	0.03131	0.0007188	-0.05817	0.001011	0.06486	5001	2000		pi.1[39838]	0.5324	0.2269	0.005145	0.02016	0.5678	0.8663	5001	2000
GRMZM5G839996	53	26	88	105		beta.i[18700]	0.000891	0.03223	0.000732	-0.06532	0.0008496	0.063	5001	2000		pi.1[18700]	0.5125	0.2143	0.004251	0.02018	0.548	0.838	5001	2000
GRMZM2G142111	38	48	71	75		beta.i[11836]	0.0009629	0.03093	0.0006821	-0.059	0.000461	0.05964	5001	2000		pi.1[11836]	0.5366	0.2164	0.004582	0.02019	0.57	0.8567	5001	2000
GRMZM2G303312	31	35	67	109		beta.i[41047]	0.002519	0.03144	0.0006684	-0.05828	0.002595	0.06598	5001	2000		pi.1[41047]	0.5551	0.2213	0.004734	0.02019	0.5962	0.8655	5001	2000
GRMZM2G062391	68	54	46	95		beta.i[4555]	0.001491	0.0318	0.0007642	-0.05934	0.002051	0.0641	5001	2000		pi.1[4555]	0.5076	0.2141	0.004858	0.02028	0.5365	0.8349	5001	2000
GRMZM2G099255	17	36	64	66		beta.i[25059]	0.001679	0.03172	0.0006948	-0.06032	0.001845	0.06386	5001	2000		pi.1[25059]	0.5731	0.2377	0.005252	0.02036	0.6223	0.8994	5001	2000
GRMZM2G336975	4	4	123	221		beta.i[12682]	0.002083	0.03128	0.0007361	-0.0604	0.002056	0.06254	5001	2000		pi.1[12682]	0.6797	0.262	0.007073	0.02042	0.7494	0.9821	5001	2000
GRMZM2G095323	31	39	69	69		beta.i[972]	0.001351	0.03234	0.0007484	-0.05991	0.000467	0.06782	5001	2000		pi.1[972]	0.5437	0.2215	0.004293	0.02043	0.5774	0.8667	5001	2000
GRMZM2G094168	29	12	115	196		beta.i[5164]	0.001318	0.03182	0.0007434	-0.06142	0.0009239	0.06523	5001	2000		pi.1[5164]	0.5562	0.225	0.005063	0.02043	0.5968	0.8763	5001	2000
GRMZM2G082745	37	23	51	273		beta.i[15967]	0.002027	0.03118	0.000833	-0.0594	0.001413	0.06319	5001	2000		pi.1[15967]	0.5436	0.2234	0.005628	0.02043	0.5794	0.8648	5001	2000
GRMZM5G837113	41	169	32	36		beta.i[23121]	0.0008686	0.03212	0.0007807	-0.06166	0.001075	0.06494	5001	2000		pi.1[23121]	0.5217	0.218	0.005193	0.02045	0.5521	0.8571	5001	2000
GRMZM2G016503	108	67	81	55		beta.i[28573]	0.001598	0.03197	0.0008141	-0.05997	0.0009517	0.06655	5001	2000		pi.1[28573]	0.4856	0.2028	0.004939	0.02052	0.5089	0.8061	5001	2000
GRMZM2G313867	28	29	58	153		beta.i[17262]	0.000527	0.03131	0.0006399	-0.06052	0.00114	0.06114	5001	2000		pi.1[17262]	0.5596	0.2258	0.005885	0.02053	0.6048	0.8782	5001	2000
GRMZM2G518764	115	45	69	112		beta.i[27390]	0.002322	0.03189	0.0007971	-0.05942	0.002776	0.0634	5001	2000		pi.1[27390]	0.4773	0.2034	0.004185	0.02054	0.5027	0.7938	5001	2000
GRMZM5G873123	23	52	55	42		beta.i[14361]	0.001422	0.03053	0.0006317	-0.05864	0.001473	0.06105	5001	2000		pi.1[14361]	0.5482	0.2289	0.004681	0.02056	0.5854	0.8815	5001	2000
GRMZM2G072238	152	35	99	137		beta.i[36272]	0.001822	0.03175	0.000708	-0.06138	0.00179	0.06524	5001	2000		pi.1[36272]	0.4743	0.1986	0.005577	0.02057	0.4951	0.7838	5001	2000
GRMZM2G150941	56	52	70	110		beta.i[16801]	0.001053	0.03163	0.000673	-0.06203	0.0007058	0.06436	5001	2000		pi.1[16801]	0.5275	0.2111	0.004604	0.02058	0.5615	0.8408	5001	2000
GRMZM2G135940	28	52	61	73		beta.i[25651]	0.001374	0.03173	0.0006922	-0.05789	0.001908	0.0655	5001	2000		pi.1[25651]	0.5574	0.2237	0.005337	0.02058	0.604	0.8701	5001	2000
GRMZM2G084525	39	21	130	96		beta.i[40093]	0.002026	0.0324	0.0006502	-0.0611	0.003113	0.06768	5001	2000		pi.1[40093]	0.5356	0.2183	0.005251	0.02062	0.571	0.8599	5001	2000
GRMZM2G163599	42	15	148	153		beta.i[30100]	0.001232	0.03138	0.0006969	-0.05956	0.0008646	0.06429	5001	2000		pi.1[30100]	0.5214	0.2219	0.004181	0.02063	0.5561	0.845	5001	2000
GRMZM2G041876	31	39	71	83		beta.i[10359]	0.0009613	0.03179	0.0007125	-0.05977	0.001086	0.06415	5001	2000		pi.1[10359]	0.5508	0.2242	0.00519	0.02067	0.5905	0.865	5001	2000
GRMZM2G476163	9	44	40	65		beta.i[8164]	0.0001438	0.03153	0.00063	-0.06189	-0.0002036	0.06251	5001	2000		pi.1[8164]	0.617	0.2497	0.004355	0.02072	0.6713	0.9344	5001	2000
GRMZM2G021567	22	25	64	99		beta.i[10035]	0.0005536	0.031	0.0006224	-0.05883	0.0009663	0.06038	5001	2000		pi.1[10035]	0.5645	0.2319	0.004672	0.0208	0.6081	0.8852	5001	2000
GRMZM2G106222	45	38	72	157		beta.i[33044]	0.00222	0.03125	0.0007752	-0.05849	0.001938	0.06516	5001	2000		pi.1[33044]	0.5441	0.2182	0.004668	0.02085	0.5818	0.8583	5001	2000
GRMZM2G117776	84	39	82	62		beta.i[16404]	0.002542	0.03082	0.000595	-0.05894	0.003365	0.06164	5001	2000		pi.1[16404]	0.4883	0.2093	0.004496	0.02088	0.5146	0.8193	5001	2000
GRMZM2G036057	324	76	88	51		beta.i[39641]	0.001208	0.03202	0.0006358	-0.06341	0.00133	0.06496	5001	2000		pi.1[39641]	0.4373	0.1937	0.004229	0.02091	0.4537	0.7564	5001	2000
GRMZM5G857620	3	3	170	276		beta.i[23204]	0.0007699	0.03262	0.0005076	-0.06531	0.001564	0.06182	5001	2000		pi.1[23204]	0.7054	0.2633	0.007132	0.02095	0.7802	0.9909	5001	2000
GRMZM2G043464	25	29	72	88		beta.i[15398]	0.002495	0.03234	0.0007886	-0.05854	0.002034	0.06763	5001	2000		pi.1[15398]	0.5571	0.2227	0.004574	0.02099	0.597	0.8758	5001	2000
GRMZM2G362306	19	40	72	71		beta.i[17552]	0.00166	0.03147	0.0007459	-0.05901	0.002178	0.06243	5001	2000		pi.1[17552]	0.5767	0.2309	0.005368	0.02102	0.6199	0.8978	5001	2000
GRMZM2G056377	30	52	77	62		beta.i[4427]	0.0016	0.03205	0.0008015	-0.06232	0.0009693	0.06472	5001	2000		pi.1[4427]	0.5574	0.2221	0.004937	0.02103	0.5949	0.8702	5001	2000
GRMZM5G876191	56	19	141	151		beta.i[9192]	0.001302	0.03102	0.000748	-0.06087	0.0009756	0.06171	5001	2000		pi.1[9192]	0.5194	0.2134	0.004691	0.02111	0.5514	0.8433	5001	2000
GRMZM2G118362	8	21	99	60		beta.i[16410]	0.0003402	0.03163	0.0006278	-0.06135	0.000524	0.06275	5001	2000		pi.1[16410]	0.6241	0.244	0.004772	0.02118	0.6781	0.9384	5001	2000
GRMZM2G044038	48	27	62	114		beta.i[4208]	0.001151	0.03153	0.0008855	-0.05971	0.001031	0.06123	5001	2000		pi.1[4208]	0.5237	0.2192	0.005551	0.02119	0.5576	0.8442	5001	2000
GRMZM2G181422	45	45	90	97		beta.i[21693]	0.000196	0.03229	0.000724	-0.06409	0.0004882	0.06089	5001	2000		pi.1[21693]	0.5381	0.2164	0.005418	0.02127	0.5755	0.8481	5001	2000
GRMZM2G073884	2	5	106	164		beta.i[36285]	3.208e-05	0.03095	0.0006481	-0.05806	0.0001271	0.06208	5001	2000		pi.1[36285]	0.7137	0.2667	0.005249	0.0213	0.7907	0.9924	5001	2000
GRMZM5G875655	20	24	87	100		beta.i[18898]	0.001434	0.03173	0.0008034	-0.06058	0.0007563	0.06349	5001	2000		pi.1[18898]	0.5775	0.2287	0.005682	0.02132	0.625	0.8934	5001	2000
GRMZM2G034526	21	30	70	101		beta.i[15273]	0.00176	0.0312	0.0007351	-0.058	0.001739	0.06439	5001	2000		pi.1[15273]	0.573	0.2274	0.005708	0.02135	0.6173	0.89	5001	2000
AC211276.4_FG008	8	11	64	199		beta.i[23627]	0.001351	0.03261	0.0005718	-0.06457	0.001817	0.062	5001	2000		pi.1[23627]	0.6337	0.2502	0.00599	0.02136	0.693	0.9412	5001	2000
GRMZM2G334954	91	35	100	110		beta.i[17390]	0.002202	0.03155	0.0007596	-0.0583	0.001993	0.06407	5001	2000		pi.1[17390]	0.4969	0.2075	0.004895	0.02139	0.5234	0.8131	5001	2000
GRMZM2G380286	6	9	49	325		beta.i[7410]	0.001289	0.03096	0.0007806	-0.05956	0.0008632	0.06082	5001	2000		pi.1[7410]	0.6645	0.2453	0.005457	0.02141	0.7187	0.9637	5001	2000
GRMZM2G040452	78	28	114	215		beta.i[19791]	0.00118	0.0309	0.0005407	-0.05924	0.0004351	0.06277	5001	2000		pi.1[19791]	0.5107	0.2102	0.004355	0.02148	0.5452	0.829	5001	2000
GRMZM2G448213	137	38	129	131		beta.i[22443]	0.0001236	0.03059	0.0006686	-0.05997	-0.0006954	0.06032	5001	2000		pi.1[22443]	0.4856	0.2019	0.003689	0.0215	0.5186	0.7991	5001	2000
GRMZM5G834157	132	116	54	50		beta.i[42100]	0.002073	0.0301	0.0007228	-0.0562	0.002696	0.05887	5001	2000		pi.1[42100]	0.4761	0.2014	0.004414	0.02152	0.5021	0.7918	5001	2000
GRMZM2G174137	27	44	86	69		beta.i[17097]	6.113e-05	0.03137	0.0008427	-0.06006	-0.0003972	0.06177	5001	2000		pi.1[17097]	0.5616	0.2247	0.005197	0.02159	0.6088	0.8845	5001	2000
GRMZM2G055678	42	19	128	169		beta.i[28953]	0.002423	0.03189	0.0007788	-0.06155	0.003314	0.06194	5001	2000		pi.1[28953]	0.5392	0.2182	0.004054	0.02163	0.5818	0.8452	5001	2000
GRMZM2G075892	22	95	31	111		beta.i[4800]	0.001124	0.03139	0.0007596	-0.05533	0.0008778	0.06317	5001	2000		pi.1[4800]	0.5734	0.2317	0.005747	0.02165	0.6201	0.8945	5001	2000
GRMZM5G827690	3	4	203	196		beta.i[8834]	0.001206	0.03105	0.0007229	-0.05947	0.0007884	0.06337	5001	2000		pi.1[8834]	0.7084	0.2574	0.007178	0.02165	0.7782	0.9909	5001	2000
GRMZM5G895991	20	33	84	43		beta.i[9360]	0.001515	0.03173	0.0006921	-0.06035	0.0005344	0.06447	5001	2000		pi.1[9360]	0.5635	0.2338	0.004365	0.02166	0.608	0.892	5001	2000
GRMZM2G490567	445	140	66	52		beta.i[27317]	0.001812	0.03129	0.0007659	-0.05929	0.002155	0.06133	5001	2000		pi.1[27317]	0.433	0.1853	0.004933	0.02168	0.4523	0.7452	5001	2000
GRMZM2G080542	16	37	56	46		beta.i[29198]	0.001403	0.03157	0.0007863	-0.05952	0.001499	0.06224	5001	2000		pi.1[29198]	0.5654	0.2361	0.00481	0.02168	0.6068	0.8967	5001	2000
GRMZM2G421795	52	140	45	33		beta.i[41517]	0.0005489	0.03213	0.0007688	-0.06165	0.0003316	0.06527	5001	2000		pi.1[41517]	0.5101	0.2117	0.005991	0.02173	0.5419	0.8348	5001	2000
GRMZM5G860173	52	33	92	92		beta.i[23211]	0.0005135	0.03072	0.0008036	-0.05827	0.0006957	0.05892	5001	2000		pi.1[23211]	0.5203	0.2181	0.004808	0.02175	0.5533	0.8447	5001	2000
GRMZM2G136494	63	108	58	27		beta.i[1330]	0.00138	0.03176	0.0006678	-0.06148	0.001799	0.06211	5001	2000		pi.1[1330]	0.5035	0.2128	0.005646	0.02177	0.5385	0.8301	5001	2000
GRMZM2G072119	239	28	131	241		beta.i[20215]	0.001233	0.03053	0.0005849	-0.05762	2.781e-06	0.06104	5001	2000		pi.1[20215]	0.4542	0.1924	0.004279	0.02178	0.4783	0.7632	5001	2000
GRMZM2G083580	71	62	132	37		beta.i[32834]	0.002646	0.03232	0.000727	-0.06117	0.002486	0.06595	5001	2000		pi.1[32834]	0.5055	0.2051	0.004915	0.0218	0.5362	0.8185	5001	2000
GRMZM5G853347	26	182	52	22		beta.i[9026]	0.001459	0.03194	0.000753	-0.06101	0.001243	0.06443	5001	2000		pi.1[9026]	0.5432	0.2269	0.004099	0.02181	0.5786	0.878	5001	2000
GRMZM2G171884	41	39	89	132		beta.i[33669]	0.001275	0.03151	0.0006936	-0.05899	0.001502	0.0645	5001	2000		pi.1[33669]	0.549	0.2141	0.005722	0.02187	0.5911	0.8576	5001	2000
GRMZM2G143883	36	105	22	264		beta.i[6119]	0.001511	0.0322	0.0007687	-0.06303	0.002067	0.06265	5001	2000		pi.1[6119]	0.5429	0.2233	0.004656	0.0219	0.584	0.8563	5001	2000
GRMZM5G814985	25	26	80	86		beta.i[18554]	0.0009569	0.03041	0.0006835	-0.05788	0.0006751	0.05927	5001	2000		pi.1[18554]	0.5538	0.2326	0.005063	0.0219	0.5952	0.8802	5001	2000
GRMZM2G178807	19	41	106	50		beta.i[1692]	0.002454	0.03071	0.0006004	-0.05845	0.003046	0.06144	5001	2000		pi.1[1692]	0.57	0.2288	0.005164	0.022	0.609	0.8914	5001	2000
GRMZM2G134385	12	31	113	52		beta.i[16603]	0.001518	0.03153	0.0006652	-0.06145	0.001148	0.06335	5001	2000		pi.1[16603]	0.5972	0.2385	0.00524	0.02202	0.6503	0.9172	5001	2000
GRMZM2G032160	5	20	52	91		beta.i[32286]	0.001309	0.03168	0.0006147	-0.05884	0.001184	0.0627	5001	2000		pi.1[32286]	0.6502	0.2601	0.006847	0.02202	0.715	0.9673	5001	2000
ARF2	25	27	55	149		beta.i[6292]	0.0007013	0.03127	0.000646	-0.06186	0.0007864	0.06208	5001	2000		pi.1[6292]	0.5628	0.2238	0.005586	0.02208	0.6069	0.8761	5001	2000
GRMZM2G170982	18	51	52	108		beta.i[6618]	0.001508	0.03211	0.0006382	-0.06208	0.001795	0.06369	5001	2000		pi.1[6618]	0.5834	0.2329	0.005097	0.02208	0.6264	0.9013	5001	2000
GRMZM2G300135	9	22	44	116		beta.i[26317]	0.001042	0.0318	0.00076	-0.05976	0.001387	0.06394	5001	2000		pi.1[26317]	0.6249	0.2456	0.004558	0.02209	0.6772	0.9296	5001	2000
GRMZM5G882852	3	3	107	293		beta.i[14438]	0.0002515	0.03148	0.0007048	-0.05949	0.0003367	0.06319	5001	2000		pi.1[14438]	0.7042	0.2626	0.006381	0.02219	0.7785	0.9911	5001	2000
GRMZM2G119370	85	30	107	211		beta.i[1167]	0.002425	0.03131	0.000651	-0.05956	0.002397	0.06469	5001	2000		pi.1[1167]	0.5134	0.2088	0.004728	0.02222	0.5469	0.819	5001	2000
GRMZM2G176144	22	60	59	74		beta.i[6713]	0.0008278	0.03142	0.0006471	-0.06263	0.001027	0.06193	5001	2000		pi.1[6713]	0.5686	0.225	0.005781	0.02223	0.6084	0.8899	5001	2000
GRMZM2G331105	5	5	181	146		beta.i[41166]	-0.0003003	0.03186	0.0008622	-0.06175	-0.0005417	0.06209	5001	2000		pi.1[41166]	0.6593	0.2545	0.005866	0.02229	0.7235	0.9687	5001	2000
GRMZM2G153275	29	27	124	94		beta.i[12014]	0.0007686	0.03081	0.0008737	-0.05586	-0.0005154	0.06185	5001	2000		pi.1[12014]	0.5573	0.2186	0.004445	0.0223	0.5929	0.8772	5001	2000
GRMZM2G022310	43	47	48	100		beta.i[32185]	0.0006287	0.03121	0.0006563	-0.05816	0.0002605	0.06335	5001	2000		pi.1[32185]	0.5325	0.2197	0.0057	0.02234	0.569	0.8531	5001	2000
GRMZM5G878073	43	37	194	40		beta.i[9207]	0.001513	0.0316	0.0007204	-0.05919	0.001533	0.06517	5001	2000		pi.1[9207]	0.5209	0.2144	0.004151	0.02243	0.5541	0.8409	5001	2000
GRMZM2G006781	7	16	55	96		beta.i[3452]	0.00039	0.03146	0.0007364	-0.06194	0.001172	0.06327	5001	2000		pi.1[3452]	0.6277	0.2583	0.004896	0.02264	0.689	0.9472	5001	2000
GRMZM5G862016	63	130	35	32		beta.i[23221]	0.0009225	0.03109	0.0007439	-0.05855	0.0006897	0.06318	5001	2000		pi.1[23221]	0.4935	0.2165	0.005577	0.02264	0.5244	0.8251	5001	2000
GRMZM2G171187	8	24	48	111		beta.i[1616]	0.002321	0.03201	0.0005898	-0.05898	0.001648	0.06573	5001	2000		pi.1[1616]	0.6284	0.2426	0.005445	0.02266	0.6808	0.9429	5001	2000
GRMZM2G145655	315	40	240	91		beta.i[29899]	0.00298	0.0316	0.0008168	-0.05904	0.002593	0.06402	5001	2000		pi.1[29899]	0.4523	0.1884	0.004315	0.02267	0.472	0.761	5001	2000
GRMZM5G814117	68	103	33	56		beta.i[8725]	0.0008993	0.03157	0.0007856	-0.0601	0.0005876	0.06418	5001	2000		pi.1[8725]	0.4976	0.2118	0.005737	0.02272	0.5266	0.8288	5001	2000
GRMZM2G087245	12	52	37	143		beta.i[20416]	0.0006755	0.03177	0.0007469	-0.06189	0.001808	0.06331	5001	2000		pi.1[20416]	0.6005	0.2428	0.005319	0.02273	0.6544	0.9146	5001	2000
GRMZM2G024159	35	35	90	68		beta.i[3803]	0.0008148	0.03118	0.0006941	-0.05887	0.0001346	0.06044	5001	2000		pi.1[3803]	0.5324	0.2234	0.004682	0.02275	0.5712	0.8635	5001	2000
GRMZM2G385338	35	27	111	123		beta.i[22144]	0.0008423	0.03223	0.0006078	-0.06679	0.001196	0.0633	5001	2000		pi.1[22144]	0.5532	0.2136	0.004507	0.02277	0.5902	0.8659	5001	2000
GRMZM2G127150	11	26	107	65		beta.i[5815]	0.003219	0.03089	0.000835	-0.05818	0.002517	0.0624	5001	2000		pi.1[5815]	0.6124	0.2368	0.006856	0.0228	0.6538	0.9208	5001	2000
GRMZM2G142043	49	40	87	78		beta.i[21179]	0.0004945	0.03248	0.0007417	-0.06195	0.001333	0.064	5001	2000		pi.1[21179]	0.5284	0.2139	0.005175	0.0228	0.5612	0.842	5001	2000
GRMZM2G078860	171	37	157	126		beta.i[29175]	-0.0001881	0.03232	0.0007777	-0.0637	-0.0004159	0.06225	5001	2000		pi.1[29175]	0.4826	0.1907	0.003838	0.02282	0.5034	0.7902	5001	2000
GRMZM2G428933	60	37	82	103		beta.i[41532]	0.0003358	0.03202	0.0007487	-0.06077	0.0001175	0.06358	5001	2000		pi.1[41532]	0.521	0.2112	0.004659	0.02287	0.5572	0.8368	5001	2000
GRMZM2G035524	10	15	68	152		beta.i[39633]	0.001996	0.03152	0.0007479	-0.06126	0.001664	0.06255	5001	2000		pi.1[39633]	0.6134	0.2436	0.00614	0.0229	0.6652	0.9279	5001	2000
GRMZM2G001850	20	34	101	33		beta.i[3356]	0.002011	0.03214	0.000651	-0.06078	0.002179	0.06538	5001	2000		pi.1[3356]	0.5546	0.2311	0.005168	0.02295	0.5869	0.886	5001	2000
GRMZM2G157168	12	6	316	150		beta.i[1527]	0.001454	0.03157	0.000626	-0.05897	0.0006849	0.0637	5001	2000		pi.1[1527]	0.5885	0.2348	0.004625	0.02299	0.6279	0.9138	5001	2000
GRMZM2G160046	26	28	125	83		beta.i[25988]	0.001873	0.03213	0.000631	-0.06198	0.001923	0.06334	5001	2000		pi.1[25988]	0.5674	0.2242	0.005048	0.023	0.6142	0.8738	5001	2000
GRMZM2G326363	41	31	91	123		beta.i[41139]	0.001238	0.03207	0.0006925	-0.06282	0.001615	0.06396	5001	2000		pi.1[41139]	0.5382	0.219	0.005432	0.023	0.5769	0.8578	5001	2000
GRMZM2G020929	103	122	65	32		beta.i[28610]	0.002079	0.03085	0.0006122	-0.05687	0.002283	0.06286	5001	2000		pi.1[28610]	0.4891	0.2035	0.004521	0.02302	0.5127	0.8058	5001	2000
GRMZM5G838907	92	39	110	93		beta.i[14163]	0.001439	0.03134	0.0006489	-0.06017	0.001553	0.06089	5001	2000		pi.1[14163]	0.5012	0.2071	0.003918	0.02312	0.5295	0.8216	5001	2000
GRMZM2G028568	17	19	102	113		beta.i[15203]	0.0009427	0.03145	0.0006909	-0.05944	0.00143	0.06182	5001	2000		pi.1[15203]	0.5843	0.2313	0.005996	0.02315	0.631	0.9017	5001	2000
GRMZM5G809265	77	35	90	95		beta.i[8690]	0.0008428	0.03206	0.0006597	-0.06148	0.0008252	0.06277	5001	2000		pi.1[8690]	0.5041	0.2103	0.005722	0.02316	0.5309	0.8272	5001	2000
GRMZM2G040017	39	33	63	129		beta.i[10316]	-0.0003962	0.03148	0.0006911	-0.06255	-0.0001171	0.05916	5001	2000		pi.1[10316]	0.5375	0.2184	0.004871	0.02318	0.5697	0.8495	5001	2000
GRMZM2G106338	36	42	91	82		beta.i[25174]	0.0007713	0.03147	0.0007732	-0.05869	0.0003959	0.06348	5001	2000		pi.1[25174]	0.5519	0.2168	0.005041	0.02318	0.5929	0.8556	5001	2000
GRMZM2G161278	186	73	75	56		beta.i[12130]	0.00108	0.03117	0.0006662	-0.05932	0.0008993	0.06249	5001	2000		pi.1[12130]	0.4676	0.1977	0.00398	0.02321	0.4923	0.7879	5001	2000
GRMZM2G092120	50	23	69	100		beta.i[36511]	0.001493	0.03154	0.0006321	-0.06233	0.002427	0.06198	5001	2000		pi.1[36511]	0.515	0.2192	0.005593	0.02322	0.5446	0.8439	5001	2000
GRMZM2G310002	32	31	98	75		beta.i[21773]	0.000717	0.03113	0.0007311	-0.06192	0.001191	0.05961	5001	2000		pi.1[21773]	0.537	0.2247	0.005594	0.02335	0.5692	0.8623	5001	2000
GRMZM2G514766	75	137	39	51		beta.i[8315]	0.001771	0.03112	0.0007311	-0.05852	0.001667	0.06407	5001	2000		pi.1[8315]	0.5041	0.2112	0.004693	0.02341	0.5366	0.8238	5001	2000
GRMZM2G052336	67	37	71	140		beta.i[32497]	-0.0001711	0.03149	0.0007291	-0.06443	7.954e-05	0.0611	5001	2000		pi.1[32497]	0.5189	0.2114	0.004565	0.02345	0.5536	0.8285	5001	2000
GRMZM2G557322	109	183	43	62		beta.i[27481]	0.001975	0.0317	0.0006788	-0.06126	0.002403	0.06309	5001	2000		pi.1[27481]	0.4942	0.2014	0.00449	0.02348	0.5224	0.8079	5001	2000
GRMZM2G438817	23	31	94	48		beta.i[7843]	-0.0001795	0.03212	0.0007196	-0.06385	-0.0005835	0.06423	5001	2000		pi.1[7843]	0.5522	0.2304	0.006144	0.0235	0.5907	0.8793	5001	2000
AC184787.2_FG002	21	23	88	116		beta.i[19028]	0.0003578	0.03104	0.0005594	-0.0603	0.0006136	0.06042	5001	2000		pi.1[19028]	0.5715	0.222	0.005392	0.02356	0.6158	0.8793	5001	2000
GRMZM2G397002	14	17	146	78		beta.i[7524]	0.001473	0.03205	0.0008682	-0.06183	0.001494	0.06429	5001	2000		pi.1[7524]	0.5929	0.2341	0.005293	0.02357	0.6346	0.9089	5001	2000
GRMZM2G007914	157	39	127	113		beta.i[9824]	0.001731	0.0325	0.0009217	-0.06241	0.002554	0.06529	5001	2000		pi.1[9824]	0.4772	0.2003	0.003563	0.02358	0.5044	0.7922	5001	2000
GRMZM5G872861	21	12	451	68		beta.i[42271]	0.0004529	0.03221	0.0007088	-0.06061	-0.0001325	0.06792	5001	2000		pi.1[42271]	0.5578	0.2269	0.005323	0.02358	0.5927	0.8889	5001	2000
GRMZM2G121176	47	52	75	121		beta.i[25411]	0.0002106	0.03158	0.0007738	-0.06372	0.001145	0.06264	5001	2000		pi.1[25411]	0.5404	0.2116	0.005176	0.0236	0.5738	0.8461	5001	2000
GRMZM2G030169	27	14	93	181		beta.i[24143]	0.0007604	0.03211	0.0006951	-0.06545	0.0001117	0.06253	5001	2000		pi.1[24143]	0.5513	0.2277	0.004377	0.02361	0.5986	0.8755	5001	2000
GRMZM2G401062	35	30	70	117		beta.i[13084]	0.001039	0.03176	0.0007048	-0.06002	0.0003941	0.06519	5001	2000		pi.1[13084]	0.5398	0.222	0.006025	0.02366	0.5724	0.8661	5001	2000
GRMZM2G054807	32	46	45	102		beta.i[15565]	0.000449	0.03113	0.0005978	-0.06159	0.001126	0.06013	5001	2000		pi.1[15565]	0.5417	0.2231	0.005134	0.02368	0.5792	0.8775	5001	2000
GRMZM2G157132	36	34	75	115		beta.i[37275]	0.001849	0.03125	0.0007207	-0.05731	0.001131	0.06724	5001	2000		pi.1[37275]	0.5452	0.2274	0.00616	0.02373	0.5851	0.8679	5001	2000
GRMZM5G816356	18	41	47	85		beta.i[18562]	0.0002625	0.03173	0.0007069	-0.06101	-9.693e-05	0.06356	5001	2000		pi.1[18562]	0.5705	0.2322	0.005755	0.02375	0.6156	0.8944	5001	2000
GRMZM2G335377	29	80	57	41		beta.i[37713]	0.0005696	0.03158	0.0006988	-0.06614	0.001176	0.06194	5001	2000		pi.1[37713]	0.5452	0.2177	0.005783	0.02375	0.5764	0.8651	5001	2000
GRMZM2G006083	54	40	115	98		beta.i[264]	0.0009825	0.03138	0.0007214	-0.05957	6.751e-05	0.06365	5001	2000		pi.1[264]	0.535	0.2145	0.005541	0.02379	0.5718	0.8416	5001	2000
GRMZM2G009438	27	27	85	72		beta.i[19403]	0.001898	0.03203	0.0007259	-0.06119	0.002588	0.0662	5001	2000		pi.1[19403]	0.5474	0.226	0.004744	0.02383	0.5879	0.8746	5001	2000
GRMZM2G077181	20	35	49	125		beta.i[4824]	0.001327	0.03101	0.0008056	-0.06014	0.002313	0.06234	5001	2000		pi.1[4824]	0.5712	0.232	0.004806	0.02386	0.6178	0.8892	5001	2000
GRMZM2G019619	28	30	85	99		beta.i[35655]	0.0007733	0.03189	0.0006415	-0.06466	0.0004611	0.06308	5001	2000		pi.1[35655]	0.5512	0.2244	0.005105	0.02393	0.5899	0.8705	5001	2000
GRMZM2G319578	35	36	80	147		beta.i[6972]	8.291e-05	0.03125	0.0007421	-0.06101	0.000172	0.06206	5001	2000		pi.1[6972]	0.5541	0.2197	0.005077	0.02396	0.592	0.8656	5001	2000
GRMZM2G337532	39	17	117	139		beta.i[12689]	0.001004	0.0312	0.0008739	-0.06226	0.001945	0.06434	5001	2000		pi.1[12689]	0.5376	0.2171	0.005171	0.02399	0.574	0.8577	5001	2000
GRMZM2G161009	29	40	72	73		beta.i[37315]	0.001756	0.03073	0.000637	-0.056	0.001557	0.06311	5001	2000		pi.1[37315]	0.5517	0.2241	0.00536	0.02402	0.5896	0.8727	5001	2000
GRMZM2G111954	16	393	28	32		beta.i[11420]	0.0005933	0.03137	0.0006601	-0.05928	2.514e-05	0.06136	5001	2000		pi.1[11420]	0.5646	0.227	0.004771	0.02409	0.6013	0.8886	5001	2000
GRMZM2G576002	31	22	77	93		beta.i[18416]	0.002302	0.03182	0.0007969	-0.05686	0.002378	0.06406	5001	2000		pi.1[18416]	0.5442	0.2272	0.006097	0.02411	0.5837	0.8714	5001	2000
GRMZM2G570454	91	136	46	57		beta.i[27520]	0.0008788	0.03208	0.0007439	-0.05963	0.0003256	0.06523	5001	2000		pi.1[27520]	0.4981	0.2087	0.004344	0.02416	0.5227	0.8207	5001	2000
GRMZM2G032676	122	48	90	133		beta.i[28726]	0.001976	0.03169	0.0007357	-0.06029	0.002675	0.06338	5001	2000		pi.1[28726]	0.4888	0.2019	0.004435	0.02416	0.5123	0.7986	5001	2000
GRMZM2G466780	24	51	71	46		beta.i[18090]	0.000953	0.03152	0.0006409	-0.05635	0.0005431	0.06252	5001	2000		pi.1[18090]	0.5543	0.2233	0.00538	0.02417	0.588	0.883	5001	2000
GRMZM2G112535	26	48	88	59		beta.i[36753]	0.0001164	0.03138	0.0006411	-0.06336	0.001076	0.06128	5001	2000		pi.1[36753]	0.557	0.2239	0.005588	0.02421	0.595	0.8813	5001	2000
GRMZM2G090279	15	13	103	124		beta.i[11121]	0.001932	0.03176	0.0006363	-0.06096	0.002146	0.06481	5001	2000		pi.1[11121]	0.5847	0.2374	0.00541	0.02422	0.6338	0.9058	5001	2000
GRMZM2G149422	39	23	78	166		beta.i[21276]	0.000796	0.03153	0.0006537	-0.05584	-0.0004951	0.06792	5001	2000		pi.1[21276]	0.5365	0.218	0.005115	0.02424	0.5748	0.8567	5001	2000
GRMZM2G422606	102	192	40	46		beta.i[38095]	0.002153	0.03227	0.0007065	-0.06302	0.003154	0.06485	5001	2000		pi.1[38095]	0.49	0.2017	0.005058	0.02444	0.5164	0.8036	5001	2000
GRMZM2G164862	43	80	40	78		beta.i[33597]	0.0004908	0.03171	0.0006511	-0.06483	0.000541	0.06064	5001	2000		pi.1[33597]	0.5281	0.2189	0.005395	0.02445	0.5695	0.8469	5001	2000
GRMZM2G142834	20	18	142	78		beta.i[11844]	0.002027	0.03211	0.0006817	-0.05758	0.001965	0.06467	5001	2000		pi.1[11844]	0.5691	0.2281	0.005053	0.02447	0.6038	0.8941	5001	2000
GRMZM2G055309	65	26	115	190		beta.i[19997]	9.272e-05	0.03098	0.0005898	-0.05904	0.0001531	0.06367	5001	2000		pi.1[19997]	0.5253	0.2138	0.004558	0.02451	0.5672	0.8355	5001	2000
GRMZM2G346693	36	31	105	69		beta.i[26562]	0.001006	0.03114	0.0006726	-0.06232	0.001747	0.06305	5001	2000		pi.1[26562]	0.5363	0.2217	0.004992	0.02452	0.5694	0.8657	5001	2000
GRMZM2G310368	20	21	83	100		beta.i[17246]	0.0003312	0.03149	0.0006146	-0.06037	0.0006555	0.06466	5001	2000		pi.1[17246]	0.573	0.2282	0.005014	0.02456	0.6152	0.887	5001	2000
GRMZM5G893607	163	87	100	67		beta.i[14507]	0.001498	0.03181	0.0007648	-0.06205	0.00116	0.06402	5001	2000		pi.1[14507]	0.4799	0.2004	0.004247	0.02467	0.5098	0.7935	5001	2000
GRMZM5G811968	2	2	176	319		beta.i[8708]	0.001062	0.03113	0.0007563	-0.05979	0.0004671	0.0614	5001	2000		pi.1[8708]	0.7227	0.2663	0.007192	0.02469	0.8021	0.9938	5001	2000
GRMZM2G172710	71	99	72	32		beta.i[17081]	0.001782	0.03218	0.0007277	-0.05897	0.0008976	0.06521	5001	2000		pi.1[17081]	0.5061	0.2042	0.004937	0.02479	0.5343	0.815	5001	2000
GRMZM2G026490	115	29	126	123		beta.i[24077]	0.001223	0.03107	0.0005041	-0.05944	0.0008139	0.06075	5001	2000		pi.1[24077]	0.4864	0.2007	0.00459	0.0248	0.5082	0.8072	5001	2000
GRMZM2G470981	50	29	72	195		beta.i[18113]	0.0003118	0.03172	0.0007798	-0.06173	0.000526	0.06249	5001	2000		pi.1[18113]	0.5358	0.2115	0.004954	0.02484	0.5719	0.8408	5001	2000
GRMZM2G168228	9	34	62	101		beta.i[40895]	0.002467	0.03176	0.0006605	-0.0584	0.002128	0.06401	5001	2000		pi.1[40895]	0.6182	0.2416	0.005185	0.02487	0.6676	0.9316	5001	2000
GRMZM2G077305	60	35	114	102		beta.i[32764]	0.001355	0.0304	0.0007043	-0.05788	0.001453	0.05976	5001	2000		pi.1[32764]	0.5235	0.2094	0.004615	0.02489	0.5551	0.8366	5001	2000
GRMZM2G406651	10	28	61	52		beta.i[34172]	0.00121	0.03154	0.0006409	-0.06054	0.001646	0.06333	5001	2000		pi.1[34172]	0.6003	0.2375	0.005789	0.0249	0.6434	0.9258	5001	2000
GRMZM2G159587	14	41	47	85		beta.i[6430]	0.001053	0.03168	0.0007713	-0.06076	0.00137	0.06185	5001	2000		pi.1[6430]	0.5869	0.2366	0.005388	0.02505	0.6351	0.9042	5001	2000
GRMZM2G016705	30	56	54	95		beta.i[9965]	0.001395	0.03137	0.0007091	-0.05725	0.0007051	0.06505	5001	2000		pi.1[9965]	0.5612	0.2172	0.004897	0.02507	0.5993	0.8632	5001	2000
GRMZM5G820808	2	3	202	224		beta.i[38731]	0.0004588	0.03157	0.0007671	-0.0631	0.0006381	0.06367	5001	2000		pi.1[38731]	0.7296	0.255	0.006473	0.02511	0.8003	0.9946	5001	2000
GRMZM2G074850	17	22	101	111		beta.i[29141]	0.0002692	0.03137	0.0007465	-0.05864	-0.0005225	0.06289	5001	2000		pi.1[29141]	0.5849	0.231	0.004986	0.02513	0.6306	0.9035	5001	2000
GRMZM2G117060	3	6	95	143		beta.i[11499]	0.001036	0.03201	0.0007089	-0.06134	0.0007771	0.06285	5001	2000		pi.1[11499]	0.7019	0.2677	0.007784	0.02518	0.7815	0.9904	5001	2000
GRMZM2G104484	38	14	131	85		beta.i[25142]	0.00164	0.03159	0.000758	-0.06057	0.002582	0.06456	5001	2000		pi.1[25142]	0.5128	0.2202	0.00527	0.02518	0.5454	0.8551	5001	2000
GRMZM2G095104	32	45	82	95		beta.i[40193]	0.002334	0.031	0.0006574	-0.05707	0.002649	0.06595	5001	2000		pi.1[40193]	0.5504	0.219	0.004648	0.02518	0.5845	0.864	5001	2000
GRMZM2G178432	57	78	66	31		beta.i[30254]	0.002045	0.03084	0.0006783	-0.06183	0.003152	0.06203	5001	2000		pi.1[30254]	0.5091	0.2127	0.004737	0.02519	0.5386	0.8329	5001	2000
GRMZM2G339395	99	82	44	61		beta.i[30466]	0.001617	0.03229	0.0006277	-0.05972	0.0014	0.06551	5001	2000		pi.1[30466]	0.4806	0.2033	0.00542	0.02529	0.5008	0.8067	5001	2000
GRMZM2G325643	66	21	114	118		beta.i[1836]	0.001876	0.03166	0.0007526	-0.0594	0.002538	0.06106	5001	2000		pi.1[1836]	0.5048	0.2136	0.004609	0.0253	0.5366	0.8285	5001	2000
GRMZM2G098084	58	100	73	21		beta.i[5238]	0.002689	0.03146	0.0005568	-0.05869	0.002992	0.064	5001	2000		pi.1[5238]	0.5099	0.2119	0.004813	0.0253	0.541	0.8286	5001	2000
GRMZM2G170044	21	13	181	162		beta.i[33656]	0.001066	0.03137	0.0006516	-0.05989	0.0006472	0.06307	5001	2000		pi.1[33656]	0.5761	0.2275	0.005455	0.02531	0.6204	0.8917	5001	2000
GRMZM2G014009	9	68	45	38		beta.i[9927]	0.0003604	0.03071	0.000678	-0.06228	0.0001881	0.05922	5001	2000		pi.1[9927]	0.609	0.2405	0.005098	0.02532	0.6589	0.9283	5001	2000
GRMZM2G134476	24	18	113	125		beta.i[40591]	0.001572	0.03008	0.0006049	-0.05646	0.0009631	0.06085	5001	2000		pi.1[40591]	0.5609	0.2225	0.004509	0.02535	0.5981	0.8731	5001	2000
GRMZM2G413810	47	25	152	55		beta.i[34204]	0.001825	0.03185	0.0007796	-0.06143	0.001914	0.06441	5001	2000		pi.1[34204]	0.511	0.2184	0.005754	0.02537	0.5425	0.8448	5001	2000
GRMZM2G016926	28	92	41	38		beta.i[365]	0.001114	0.03108	0.0006161	-0.05845	0.001537	0.0626	5001	2000		pi.1[365]	0.5364	0.2272	0.004386	0.02539	0.578	0.8672	5001	2000
GRMZM2G084806	12	5	60	893		beta.i[29223]	0.0008505	0.0316	0.000794	-0.06118	0.0004392	0.06473	5001	2000		pi.1[29223]	0.6232	0.2333	0.00594	0.0254	0.6728	0.9229	5001	2000
GRMZM2G082580	2	3	72	341		beta.i[10995]	0.000765	0.03141	0.0007681	-0.06119	4.017e-06	0.06419	5001	2000		pi.1[10995]	0.7296	0.269	0.006848	0.02543	0.8153	0.9947	5001	2000
GRMZM2G074844	19	31	85	127		beta.i[36303]	0.001071	0.03161	0.0007491	-0.05759	0.0002811	0.06473	5001	2000		pi.1[36303]	0.5858	0.2256	0.004923	0.02546	0.6244	0.8919	5001	2000
GRMZM2G361398	81	45	78	110		beta.i[17547]	0.00174	0.03149	0.0006426	-0.06086	0.002233	0.06375	5001	2000		pi.1[17547]	0.5075	0.2104	0.005732	0.02551	0.5357	0.8226	5001	2000
GRMZM2G031087	31	10	235	246		beta.i[3935]	0.001665	0.03099	0.0006826	-0.05872	0.002109	0.06194	5001	2000		pi.1[3935]	0.5538	0.2235	0.005226	0.02552	0.5946	0.8694	5001	2000
GRMZM2G039325	46	30	69	127		beta.i[39676]	0.001819	0.03198	0.0006938	-0.06031	0.001014	0.06494	5001	2000		pi.1[39676]	0.5283	0.2202	0.005325	0.02552	0.5666	0.845	5001	2000
GRMZM2G166297	59	92	42	95		beta.i[37378]	0.001229	0.03198	0.0005384	-0.05773	0.001933	0.0653	5001	2000		pi.1[37378]	0.5146	0.209	0.004572	0.02555	0.5411	0.827	5001	2000
GRMZM5G820658	39	55	70	97		beta.i[2640]	0.0008126	0.03199	0.0006299	-0.06359	0.001531	0.06256	5001	2000		pi.1[2640]	0.5441	0.2158	0.004506	0.02567	0.5799	0.854	5001	2000
GRMZM2G098434	20	27	77	119		beta.i[16186]	6.618e-06	0.03141	0.0007371	-0.05834	-0.0003431	0.06342	5001	2000		pi.1[16186]	0.5838	0.2263	0.004833	0.02571	0.6269	0.8959	5001	2000
GRMZM2G048140	9	37	68	137		beta.i[4295]	0.001577	0.03154	0.0006923	-0.06414	0.002365	0.06161	5001	2000		pi.1[4295]	0.6391	0.2356	0.005581	0.02572	0.693	0.9354	5001	2000
SIP1-2	12	18	70	136		beta.i[36147]	0.001477	0.03169	0.0006092	-0.06415	0.002564	0.06483	5001	2000		pi.1[36147]	0.6048	0.2416	0.00559	0.02573	0.657	0.9108	5001	2000
GRMZM2G149619	27	72	54	86		beta.i[33482]	0.001107	0.03201	0.0006416	-0.06089	0.001441	0.06457	5001	2000		pi.1[33482]	0.5561	0.2257	0.005869	0.02581	0.5942	0.8757	5001	2000
AC194970.5_FG004	26	32	69	106		beta.i[9471]	0.001001	0.03209	0.0008058	-0.06219	0.0008728	0.06442	5001	2000		pi.1[9471]	0.56	0.2248	0.004721	0.02588	0.6015	0.8859	5001	2000
GRMZM2G079957	498	30	138	232		beta.i[4891]	0.0006648	0.03125	0.000764	-0.06289	0.0002517	0.06186	5001	2000		pi.1[4891]	0.4362	0.1843	0.003843	0.0259	0.4525	0.7455	5001	2000
GRMZM2G070348	29	25	112	54		beta.i[15798]	0.001512	0.03258	0.0006359	-0.06304	0.00137	0.06709	5001	2000		pi.1[15798]	0.5328	0.2265	0.005441	0.02594	0.5665	0.8638	5001	2000
GRMZM2G032694	22	29	53	177		beta.i[10208]	0.001355	0.03184	0.0008373	-0.06354	0.00196	0.06534	5001	2000		pi.1[10208]	0.5782	0.2229	0.00468	0.02596	0.6171	0.8924	5001	2000
GRMZM2G091044	4	22	49	68		beta.i[20469]	0.0007556	0.03134	0.000739	-0.0605	0.0006226	0.06309	5001	2000		pi.1[20469]	0.6753	0.2604	0.007031	0.02598	0.745	0.974	5001	2000
GRMZM5G815115	144	30	131	151		beta.i[27710]	0.001111	0.03128	0.0007296	-0.06332	0.001851	0.06093	5001	2000		pi.1[27710]	0.4784	0.2059	0.004908	0.02599	0.5036	0.8006	5001	2000
GRMZM5G817310	43	118	45	51		beta.i[38715]	9.84e-06	0.03199	0.0006674	-0.06278	-0.0002544	0.06266	5001	2000		pi.1[38715]	0.5243	0.217	0.004669	0.026	0.5598	0.8464	5001	2000
GRMZM2G088348	33	22	181	77		beta.i[24910]	0.001615	0.0319	0.0008292	-0.06157	0.001335	0.06473	5001	2000		pi.1[24910]	0.5427	0.2206	0.003432	0.02605	0.5829	0.8602	5001	2000
GRMZM2G115981	6	2	332	293		beta.i[5613]	0.0006128	0.03125	0.0007069	-0.05764	0.0002998	0.06138	5001	2000		pi.1[5613]	0.628	0.2535	0.005596	0.02607	0.6844	0.9502	5001	2000
GRMZM2G015409	136	29	135	107		beta.i[9945]	0.001087	0.03211	0.000666	-0.0594	0.001327	0.06418	5001	2000		pi.1[9945]	0.4809	0.1997	0.00516	0.02619	0.5106	0.785	5001	2000
GRMZM2G010745	8	16	85	89		beta.i[23849]	0.0008454	0.03119	0.0007624	-0.05858	8.324e-05	0.06332	5001	2000		pi.1[23849]	0.628	0.2438	0.005952	0.02621	0.6808	0.9453	5001	2000
GRMZM2G113771	126	34	102	114		beta.i[25300]	0.001513	0.03099	0.0006007	-0.05977	0.001891	0.06499	5001	2000		pi.1[25300]	0.4783	0.205	0.004845	0.02635	0.5095	0.7996	5001	2000
GRMZM2G119214	252	17	126	192		beta.i[11521]	0.001609	0.03214	0.0007663	-0.06185	0.0009624	0.064	5001	2000		pi.1[11521]	0.4317	0.196	0.004228	0.02638	0.4483	0.7606	5001	2000
GRMZM2G020653	30	31	66	101		beta.i[19573]	0.001484	0.03154	0.0007067	-0.05906	0.001929	0.06155	5001	2000		pi.1[19573]	0.5573	0.2239	0.005107	0.02643	0.5991	0.8696	5001	2000
GRMZM2G154422	24	15	107	133		beta.i[29981]	0.002609	0.03221	0.0008	-0.0613	0.003614	0.06792	5001	2000		pi.1[29981]	0.5606	0.2256	0.005134	0.02645	0.6018	0.8739	5001	2000
GRMZM2G057789	34	20	97	103		beta.i[24484]	0.001539	0.0314	0.000711	-0.06051	0.00159	0.06319	5001	2000		pi.1[24484]	0.5417	0.2275	0.005613	0.02646	0.5812	0.8724	5001	2000
GRMZM2G093458	3	2	280	265		beta.i[24988]	0.001209	0.03072	0.0008615	-0.05787	0.001555	0.06247	5001	2000		pi.1[24988]	0.6854	0.2613	0.006562	0.02646	0.7508	0.9877	5001	2000
GRMZM2G012566	65	101	44	68		beta.i[3575]	0.001074	0.03096	0.0007358	-0.05853	0.001625	0.06046	5001	2000		pi.1[3575]	0.5194	0.2068	0.004779	0.02649	0.5552	0.8244	5001	2000
GRMZM2G077678	35	73	44	34		beta.i[40025]	0.0002335	0.03164	0.0007271	-0.0642	0.0003558	0.0631	5001	2000		pi.1[40025]	0.5257	0.224	0.005544	0.02654	0.5602	0.8636	5001	2000
AC191724.2_FG003	64	55	53	192		beta.i[14606]	0.0005793	0.03145	0.0007289	-0.06217	0.0007511	0.06306	5001	2000		pi.1[14606]	0.5244	0.2114	0.004759	0.02655	0.5536	0.837	5001	2000
GRMZM2G136800	39	70	36	164		beta.i[29792]	0.002103	0.031	0.0005958	-0.05939	0.00233	0.06306	5001	2000		pi.1[29792]	0.5444	0.215	0.004402	0.02657	0.5777	0.8561	5001	2000
GRMZM2G171097	74	43	108	97		beta.i[33663]	0.001089	0.03113	0.0008142	-0.06301	0.001116	0.06399	5001	2000		pi.1[33663]	0.5209	0.2079	0.004832	0.0266	0.5527	0.8358	5001	2000
AC234154.1_FG007	29	28	95	138		beta.i[31953]	0.001138	0.03185	0.0006752	-0.06189	0.00129	0.0637	5001	2000		pi.1[31953]	0.5577	0.2234	0.005211	0.02661	0.5983	0.8745	5001	2000
GRMZM2G157879	63	20	144	140		beta.i[1533]	-5.626e-05	0.03215	0.0006744	-0.06223	-0.0001311	0.06306	5001	2000		pi.1[1533]	0.5219	0.2099	0.004418	0.02663	0.552	0.8349	5001	2000
GRMZM2G104511	19	14	87	271		beta.i[29443]	0.001355	0.03233	0.0007157	-0.06284	0.002112	0.06533	5001	2000		pi.1[29443]	0.5861	0.2294	0.005264	0.02665	0.6356	0.8957	5001	2000
GRMZM5G878080	26	122	60	49		beta.i[31665]	0.0004505	0.03136	0.0007256	-0.05831	-0.0001113	0.06317	5001	2000		pi.1[31665]	0.5598	0.224	0.005131	0.02665	0.6007	0.869	5001	2000
GRMZM2G474108	25	52	94	50		beta.i[31025]	0.001294	0.03194	0.0007079	-0.06195	0.001195	0.06212	5001	2000		pi.1[31025]	0.5623	0.223	0.004482	0.02671	0.599	0.8787	5001	2000
GRMZM2G364296	265	186	54	70		beta.i[34014]	0.00229	0.03071	0.0006768	-0.05793	0.002445	0.06322	5001	2000		pi.1[34014]	0.4726	0.1901	0.004472	0.02671	0.4936	0.7789	5001	2000
GRMZM2G180452	112	52	86	98		beta.i[6801]	0.0002393	0.03184	0.0007181	-0.06244	0.0009589	0.06213	5001	2000		pi.1[6801]	0.4946	0.2006	0.004321	0.02673	0.5156	0.8017	5001	2000
GRMZM2G138770	10	14	89	130		beta.i[11796]	8.834e-06	0.03163	0.0007947	-0.06193	-0.0004677	0.06144	5001	2000		pi.1[11796]	0.6242	0.2405	0.005939	0.02676	0.6853	0.9288	5001	2000
GRMZM2G118786	91	90	56	40		beta.i[25371]	0.001798	0.03175	0.0008558	-0.06223	0.002114	0.06287	5001	2000		pi.1[25371]	0.4818	0.2097	0.005993	0.02678	0.5094	0.8009	5001	2000
GRMZM2G047412	54	107	66	40		beta.i[35993]	0.0008763	0.0315	0.0007291	-0.06209	0.001178	0.06233	5001	2000		pi.1[35993]	0.5176	0.2178	0.004654	0.02686	0.5486	0.8414	5001	2000
PHYA1	3	10	105	113		beta.i[26312]	0.0009234	0.03129	0.0006554	-0.0619	0.0009157	0.06033	5001	2000		pi.1[26312]	0.7128	0.2516	0.00582	0.02694	0.7778	0.9861	5001	2000
GRMZM2G453376	3	4	183	159		beta.i[2270]	-6.505e-05	0.03156	0.0007238	-0.06202	-0.0005464	0.06246	5001	2000		pi.1[2270]	0.6933	0.2568	0.00657	0.02695	0.7607	0.9891	5001	2000
GRMZM2G067727	32	38	63	109		beta.i[24602]	0.002553	0.03144	0.0008147	-0.06159	0.002326	0.06502	5001	2000		pi.1[24602]	0.5531	0.222	0.00502	0.02697	0.5878	0.8768	5001	2000
GRMZM2G406099	14	29	52	112		beta.i[2104]	0.001953	0.03177	0.000814	-0.05927	0.001849	0.06293	5001	2000		pi.1[2104]	0.5935	0.2335	0.005826	0.02699	0.638	0.9068	5001	2000
GRMZM2G004572	3	9	63	186		beta.i[3415]	0.0005438	0.03199	0.0008709	-0.06155	0.001157	0.06428	5001	2000		pi.1[3415]	0.7062	0.265	0.00676	0.02703	0.7834	0.9878	5001	2000
GRMZM2G161326	107	184	24	100		beta.i[26010]	0.001104	0.03156	0.0007724	-0.06028	0.001434	0.06266	5001	2000		pi.1[26010]	0.4937	0.2059	0.004783	0.02705	0.5189	0.8106	5001	2000
GRMZM2G421604	14	29	73	126		beta.i[17851]	0.00158	0.03177	0.0006843	-0.05986	0.001571	0.0627	5001	2000		pi.1[17851]	0.5996	0.2329	0.005971	0.02713	0.6477	0.9108	5001	2000
GRMZM2G353541	45	116	29	64		beta.i[21984]	0.002188	0.03219	0.0005859	-0.06065	0.003001	0.06416	5001	2000		pi.1[21984]	0.5194	0.2196	0.005263	0.0272	0.5504	0.8484	5001	2000
GRMZM2G112456	15	30	62	76		beta.i[20771]	0.00091	0.03127	0.0006103	-0.05867	0.0008581	0.06222	5001	2000		pi.1[20771]	0.5802	0.2361	0.004938	0.02723	0.6252	0.8969	5001	2000
GRMZM2G041048	75	47	74	115		beta.i[24265]	0.001661	0.03153	0.0007015	-0.05707	0.001112	0.0625	5001	2000		pi.1[24265]	0.5123	0.2058	0.003759	0.02732	0.5415	0.83	5001	2000
GRMZM2G417223	40	20	147	129		beta.i[26949]	0.001259	0.03154	0.00071	-0.06183	0.001225	0.06242	5001	2000		pi.1[26949]	0.5436	0.2132	0.00468	0.02734	0.5785	0.8523	5001	2000
GRMZM5G822438	23	25	112	95		beta.i[2645]	0.002495	0.03257	0.0006065	-0.05576	0.00204	0.06989	5001	2000		pi.1[2645]	0.5638	0.2275	0.004768	0.0274	0.6035	0.8846	5001	2000
GRMZM2G133444	27	27	73	109		beta.i[21059]	0.00216	0.03162	0.0006949	-0.06281	0.003054	0.06402	5001	2000		pi.1[21059]	0.5474	0.2301	0.005541	0.02742	0.5914	0.8697	5001	2000
GRMZM2G071413	115	199	41	56		beta.i[4722]	0.001576	0.03145	0.0007602	-0.0579	0.001425	0.0632	5001	2000		pi.1[4722]	0.4889	0.204	0.003442	0.02743	0.5145	0.7999	5001	2000
GRMZM2G001401	6	13	93	109		beta.i[9718]	0.001062	0.03175	0.0006559	-0.06168	0.001435	0.06275	5001	2000		pi.1[9718]	0.6499	0.2522	0.004585	0.02745	0.7098	0.954	5001	2000
GRMZM2G426200	94	208	39	49		beta.i[7750]	0.001016	0.03151	0.0006642	-0.06267	0.001859	0.06317	5001	2000		pi.1[7750]	0.4987	0.2088	0.003789	0.02762	0.5274	0.8169	5001	2000
GRMZM2G031904	147	48	78	128		beta.i[10190]	-6.846e-05	0.03179	0.0007467	-0.06323	0.0002563	0.06318	5001	2000		pi.1[10190]	0.4753	0.1986	0.004613	0.02762	0.503	0.791	5001	2000
GRMZM2G031139	123	28	138	177		beta.i[3939]	0.0007241	0.0309	0.0007413	-0.06006	0.001474	0.05958	5001	2000		pi.1[3939]	0.4963	0.1986	0.004009	0.02767	0.5231	0.8038	5001	2000
GRMZM2G112596	57	43	70	88		beta.i[5521]	0.002377	0.03062	0.0007762	-0.05688	0.001198	0.06174	5001	2000		pi.1[5521]	0.5205	0.2132	0.004744	0.02767	0.5541	0.8397	5001	2000
GRMZM2G014981	224	85	84	57		beta.i[28563]	0.00154	0.03191	0.0008655	-0.05793	0.001579	0.06451	5001	2000		pi.1[28563]	0.4625	0.19	0.004295	0.02773	0.4882	0.7698	5001	2000
GRMZM2G411084	155	91	64	101		beta.i[7613]	0.00167	0.03164	0.0007899	-0.05951	0.001747	0.0651	5001	2000		pi.1[7613]	0.482	0.1968	0.003884	0.02774	0.5043	0.7908	5001	2000
GRMZM2G513208	146	42	143	63		beta.i[18259]	0.002335	0.03276	0.0007675	-0.06096	0.002701	0.06411	5001	2000		pi.1[18259]	0.4729	0.1976	0.003876	0.02774	0.4977	0.7812	5001	2000
GRMZM2G024437	19	20	81	149		beta.i[28658]	0.0009081	0.03057	0.0006637	-0.06113	0.001015	0.06174	5001	2000		pi.1[28658]	0.5799	0.2313	0.004851	0.02783	0.622	0.898	5001	2000
GRMZM2G064804	40	40	77	75		beta.i[4584]	0.0009113	0.0317	0.0006395	-0.05964	0.0006958	0.06532	5001	2000		pi.1[4584]	0.5409	0.2152	0.004445	0.02785	0.5702	0.8535	5001	2000
GRMZM5G880710	9	9	134	128		beta.i[9233]	0.0007972	0.03201	0.0006651	-0.06116	0.0004272	0.06342	5001	2000		pi.1[9233]	0.6214	0.245	0.00549	0.02786	0.6747	0.9351	5001	2000
GRMZM2G115388	46	46	44	99		beta.i[11480]	0.001478	0.03191	0.0008166	-0.06208	0.001514	0.06423	5001	2000		pi.1[11480]	0.5224	0.2205	0.004837	0.02788	0.5626	0.8475	5001	2000
GRMZM2G080959	61	39	88	68		beta.i[20341]	-0.0002972	0.03242	0.0007	-0.06398	-0.001174	0.06457	5001	2000		pi.1[20341]	0.5122	0.2097	0.004677	0.02789	0.541	0.8217	5001	2000
GRMZM2G055193	50	36	99	82		beta.i[4406]	0.001626	0.03193	0.0006675	-0.0625	0.0003329	0.06255	5001	2000		pi.1[4406]	0.5191	0.2191	0.004398	0.02797	0.5592	0.8403	5001	2000
GRMZM2G069618	18	14	80	138		beta.i[4680]	0.001443	0.03181	0.0006396	-0.0599	0.001751	0.0634	5001	2000		pi.1[4680]	0.5767	0.2277	0.004486	0.02799	0.6147	0.8898	5001	2000
GRMZM5G872934	219	38	94	189		beta.i[35029]	0.00174	0.03166	0.0006662	-0.06135	0.002825	0.06189	5001	2000		pi.1[35029]	0.4667	0.1951	0.004779	0.02801	0.4897	0.7817	5001	2000
GRMZM5G800064	64	34	85	103		beta.i[22942]	0.001614	0.03097	0.0006602	-0.05823	0.002659	0.06318	5001	2000		pi.1[22942]	0.5071	0.2167	0.004088	0.02809	0.5433	0.8349	5001	2000
GRMZM2G320827	11	41	56	48		beta.i[12573]	0.0009986	0.0322	0.0006716	-0.06118	0.0008679	0.06309	5001	2000		pi.1[12573]	0.5868	0.2427	0.005303	0.0281	0.6344	0.9146	5001	2000
GRMZM2G040634	29	34	73	55		beta.i[32372]	0.001406	0.03124	0.0006086	-0.0593	0.001964	0.06038	5001	2000		pi.1[32372]	0.5385	0.2249	0.005154	0.02816	0.5682	0.8651	5001	2000
GRMZM2G417125	19	36	58	138		beta.i[38077]	6.163e-05	0.03232	0.0006758	-0.06246	-0.0006778	0.06455	5001	2000		pi.1[38077]	0.581	0.2279	0.004642	0.02817	0.6271	0.887	5001	2000
GRMZM5G899621	170	172	48	42		beta.i[31755]	0.001847	0.0321	0.0006757	-0.05991	0.001955	0.06419	5001	2000		pi.1[31755]	0.474	0.1953	0.003631	0.02825	0.493	0.7874	5001	2000
GRMZM2G039792	28	22	89	117		beta.i[24247]	0.002325	0.03149	0.0007101	-0.05894	0.002829	0.06359	5001	2000		pi.1[24247]	0.5537	0.2242	0.004741	0.02827	0.59	0.8737	5001	2000
GRMZM2G070633	43	55	91	107		beta.i[24643]	0.001734	0.03095	0.0005802	-0.0572	0.002122	0.06108	5001	2000		pi.1[24643]	0.5473	0.2094	0.004148	0.02842	0.5843	0.8508	5001	2000
GRMZM2G444466	8	5	166	200		beta.i[41592]	0.0001888	0.03159	0.0007152	-0.0623	0.0008551	0.06347	5001	2000		pi.1[41592]	0.6248	0.2458	0.005313	0.02846	0.6783	0.9406	5001	2000
GRMZM2G445343	568	660	15	50		beta.i[7882]	0.002671	0.03157	0.0008986	-0.05961	0.003169	0.06304	5001	2000		pi.1[7882]	0.4151	0.183	0.004234	0.02847	0.4321	0.7234	5001	2000
GRMZM2G535811	34	52	97	51		beta.i[27425]	0.001081	0.03248	0.0008208	-0.06191	0.0008689	0.06657	5001	2000		pi.1[27425]	0.543	0.2227	0.00549	0.0285	0.5812	0.8575	5001	2000
GRMZM5G865961	127	103	57	71		beta.i[31611]	0.0009762	0.03202	0.0005931	-0.06271	0.0007598	0.06551	5001	2000		pi.1[31611]	0.4844	0.2012	0.004462	0.02851	0.5064	0.7907	5001	2000
GRMZM2G100497	43	45	78	100		beta.i[5284]	0.0007211	0.03154	0.0008205	-0.06183	0.001537	0.06198	5001	2000		pi.1[5284]	0.5328	0.2169	0.004093	0.02854	0.5679	0.8498	5001	2000
GRMZM2G128748	8	40	42	89		beta.i[36944]	-0.0003943	0.03153	0.0005622	-0.0639	-0.001095	0.06118	5001	2000		pi.1[36944]	0.6245	0.245	0.005622	0.02857	0.6799	0.943	5001	2000
GRMZM2G419739	28	20	111	86		beta.i[34241]	-0.0001294	0.0314	0.0008603	-0.05972	-6.858e-05	0.06253	5001	2000		pi.1[34241]	0.5466	0.226	0.005712	0.02859	0.5862	0.8782	5001	2000
GRMZM2G074087	89	89	38	53		beta.i[20251]	0.0002831	0.03222	0.0007003	-0.06245	0.0004823	0.06502	5001	2000		pi.1[20251]	0.4887	0.2084	0.00398	0.02874	0.5165	0.8166	5001	2000
AC194878.3_FG002	14	9	130	160		beta.i[39142]	0.0007674	0.03161	0.0005998	-0.0614	0.0009302	0.06199	5001	2000		pi.1[39142]	0.5931	0.2366	0.005052	0.02876	0.644	0.9099	5001	2000
GRMZM2G173868	35	26	83	114		beta.i[37492]	0.002089	0.03136	0.0006331	-0.05815	0.002186	0.06432	5001	2000		pi.1[37492]	0.5399	0.2228	0.005335	0.02877	0.5746	0.8668	5001	2000
GRMZM2G050705	13	54	51	77		beta.i[28899]	0.002393	0.03146	0.0006119	-0.05901	0.002684	0.06391	5001	2000		pi.1[28899]	0.5972	0.2352	0.005471	0.02878	0.6482	0.9144	5001	2000
GRMZM2G139621	3	7	95	184		beta.i[21149]	0.001916	0.03254	0.0007128	-0.06063	0.001783	0.06753	5001	2000		pi.1[21149]	0.7124	0.2604	0.00607	0.02881	0.7911	0.9891	5001	2000
GRMZM5G805105	17	28	58	119		beta.i[13971]	0.002974	0.03233	0.0007242	-0.06192	0.003867	0.06522	5001	2000		pi.1[13971]	0.5875	0.2289	0.003926	0.02882	0.6375	0.9	5001	2000
GRMZM2G044733	22	23	106	87		beta.i[19854]	0.0009013	0.03115	0.0006232	-0.05991	0.001016	0.06083	5001	2000		pi.1[19854]	0.576	0.2303	0.00418	0.02883	0.6181	0.8844	5001	2000
GRMZM2G030522	55	77	54	36		beta.i[10169]	0.0002641	0.03159	0.0007689	-0.06135	-8.248e-05	0.06152	5001	2000		pi.1[10169]	0.5091	0.2122	0.004191	0.02884	0.5347	0.8327	5001	2000
GRMZM2G564443	208	213	36	79		beta.i[18379]	-0.0005864	0.03152	0.0005941	-0.06202	-0.0006843	0.06008	5001	2000		pi.1[18379]	0.4674	0.1965	0.004684	0.02884	0.4906	0.7871	5001	2000
GRMZM2G176340	38	86	45	50		beta.i[21634]	0.0001896	0.0321	0.0008118	-0.0612	0.00104	0.06548	5001	2000		pi.1[21634]	0.5336	0.2188	0.004488	0.02884	0.5702	0.8566	5001	2000
GRMZM2G547542	47	32	87	48		beta.i[2476]	0.0008555	0.03081	0.0007634	-0.05913	4.343e-05	0.06022	5001	2000		pi.1[2476]	0.5166	0.2206	0.005065	0.02888	0.5503	0.8449	5001	2000
GRMZM2G405090	118	82	58	66		beta.i[26880]	0.0005587	0.03124	0.0008179	-0.06013	-2.114e-05	0.06286	5001	2000		pi.1[26880]	0.4883	0.1966	0.004267	0.02888	0.5125	0.8026	5001	2000
GRMZM5G825854	8	18	71	88		beta.i[8816]	0.001425	0.03071	0.0006643	-0.05673	0.001222	0.06273	5001	2000		pi.1[8816]	0.6267	0.2435	0.005212	0.0289	0.679	0.9437	5001	2000
GRMZM2G069295	33	60	33	63		beta.i[36243]	-2.96e-05	0.03169	0.0006186	-0.06248	-4.589e-05	0.05915	5001	2000		pi.1[36243]	0.5285	0.2245	0.005686	0.02893	0.561	0.8599	5001	2000
GRMZM2G156514	25	39	53	100		beta.i[6363]	0.001651	0.03241	0.0008946	-0.06172	0.001697	0.06569	5001	2000		pi.1[6363]	0.5698	0.2215	0.004532	0.02899	0.6146	0.885	5001	2000
GRMZM2G096367	88	36	117	47		beta.i[983]	0.002602	0.03159	0.0007737	-0.05802	0.002621	0.06374	5001	2000		pi.1[983]	0.492	0.2073	0.004456	0.029	0.516	0.812	5001	2000
GRMZM2G036131	40	12	165	177		beta.i[15319]	-0.0003626	0.032	0.0006625	-0.06198	0.000406	0.06301	5001	2000		pi.1[15319]	0.5336	0.2162	0.005097	0.02903	0.568	0.859	5001	2000
GRMZM2G021704	34	19	62	188		beta.i[15105]	0.001004	0.03242	0.0007913	-0.06146	0.000991	0.06546	5001	2000		pi.1[15105]	0.5401	0.2198	0.005279	0.02904	0.5798	0.86	5001	2000
GRMZM2G039592	49	86	44	70		beta.i[4091]	0.001647	0.03215	0.0005638	-0.06068	0.002311	0.06541	5001	2000		pi.1[4091]	0.525	0.2126	0.004373	0.02905	0.5578	0.842	5001	2000
GRMZM2G482919	139	66	69	64		beta.i[18180]	0.0008446	0.03164	0.0005906	-0.06428	0.0008785	0.06093	5001	2000		pi.1[18180]	0.4645	0.2018	0.003876	0.02905	0.4898	0.7963	5001	2000
GRMZM2G416322	9	39	47	111		beta.i[17830]	0.001826	0.03102	0.0007105	-0.05802	0.001226	0.06569	5001	2000		pi.1[17830]	0.6188	0.2407	0.004119	0.0291	0.6721	0.9297	5001	2000
GRMZM2G160473	53	42	84	78		beta.i[1556]	0.001305	0.03163	0.0006966	-0.05945	0.0006983	0.06308	5001	2000		pi.1[1556]	0.5189	0.2164	0.005861	0.02923	0.5575	0.8467	5001	2000
GRMZM5G888853	133	28	147	151		beta.i[35082]	0.001297	0.03112	0.0006742	-0.05913	0.001437	0.06166	5001	2000		pi.1[35082]	0.4869	0.203	0.004162	0.02923	0.5148	0.812	5001	2000
GRMZM2G074790	38	66	74	43		beta.i[29139]	0.001323	0.03206	0.0008292	-0.05847	0.0008582	0.06507	5001	2000		pi.1[29139]	0.5328	0.2246	0.005732	0.02924	0.5711	0.8647	5001	2000
GRMZM2G052178	56	45	143	51		beta.i[10537]	0.003101	0.03082	0.0008108	-0.05605	0.003847	0.06279	5001	2000		pi.1[10537]	0.5193	0.2092	0.004187	0.02946	0.5533	0.8357	5001	2000
GRMZM2G155837	6	37	33	68		beta.i[1516]	0.001249	0.03207	0.0006743	-0.05738	0.0004305	0.06517	5001	2000		pi.1[1516]	0.6263	0.2568	0.005328	0.02947	0.6849	0.9523	5001	2000
GRMZM2G024912	53	23	137	114		beta.i[35717]	0.001781	0.03192	0.0009103	-0.06065	0.00177	0.067	5001	2000		pi.1[35717]	0.5228	0.2158	0.005097	0.02947	0.5605	0.8369	5001	2000
GRMZM2G149335	82	95	39	44		beta.i[25854]	0.001105	0.03191	0.0006573	-0.05962	0.001019	0.06136	5001	2000		pi.1[25854]	0.4876	0.2089	0.005401	0.02949	0.5104	0.817	5001	2000
GRMZM2G001991	17	25	69	96		beta.i[35453]	0.001446	0.0316	0.0005255	-0.06076	0.00176	0.06246	5001	2000		pi.1[35453]	0.5829	0.2316	0.005318	0.02953	0.6268	0.9018	5001	2000
GRMZM2G003814	25	48	54	85		beta.i[19322]	0.0004814	0.03077	0.0007381	-0.06081	0.000619	0.06093	5001	2000		pi.1[19322]	0.562	0.2206	0.005375	0.02962	0.6014	0.88	5001	2000
GRMZM2G039011	16	30	59	108		beta.i[554]	0.0008004	0.03094	0.0006041	-0.05707	0.0007496	0.0635	5001	2000		pi.1[554]	0.5863	0.2356	0.005136	0.02968	0.6301	0.9131	5001	2000
GRMZM2G055458	11	22	92	141		beta.i[15577]	0.001934	0.03213	0.0006081	-0.06126	0.001964	0.06524	5001	2000		pi.1[15577]	0.6229	0.241	0.00654	0.02968	0.6738	0.928	5001	2000
GRMZM2G003937	3	5	106	150		beta.i[9777]	0.0007328	0.03202	0.0007691	-0.0638	0.0005324	0.06613	5001	2000		pi.1[9777]	0.6998	0.26	0.006823	0.02973	0.7831	0.9858	5001	2000
GRMZM2G091228	39	8	227	248		beta.i[36501]	0.001187	0.03048	0.0007064	-0.05776	0.001049	0.06416	5001	2000		pi.1[36501]	0.5322	0.2189	0.005127	0.02976	0.5676	0.8521	5001	2000
GRMZM2G377780	9	5	138	220		beta.i[7397]	0.001248	0.03162	0.0006955	-0.06017	0.002804	0.06263	5001	2000		pi.1[7397]	0.623	0.2365	0.004807	0.02979	0.6702	0.9335	5001	2000
GRMZM5G818088	8	11	74	224		beta.i[38719]	0.0003427	0.03251	0.0006672	-0.06515	0.0006842	0.06316	5001	2000		pi.1[38719]	0.6416	0.2531	0.005472	0.02979	0.7099	0.9457	5001	2000
epsp-s	57	35	76	125		beta.i[42297]	0.001263	0.03117	0.0006526	-0.05749	0.001065	0.06467	5001	2000		pi.1[42297]	0.5233	0.2121	0.004178	0.02984	0.5564	0.8431	5001	2000
GRMZM2G109405	7	18	96	88		beta.i[33081]	0.001199	0.03056	0.000666	-0.05839	0.001311	0.06081	5001	2000		pi.1[33081]	0.6382	0.2463	0.005948	0.02986	0.691	0.9438	5001	2000
GRMZM5G874908	79	40	91	88		beta.i[2826]	0.000789	0.03171	0.0007199	-0.06209	0.0004635	0.06381	5001	2000		pi.1[2826]	0.5015	0.2116	0.004443	0.02989	0.5321	0.8253	5001	2000
GRMZM2G407396	12	29	78	55		beta.i[7590]	0.00132	0.03113	0.0006283	-0.05894	0.001162	0.06394	5001	2000		pi.1[7590]	0.5987	0.2398	0.005486	0.0299	0.6507	0.9161	5001	2000
AC191551.3_FG003	119	41	102	112		beta.i[14602]	0.00211	0.03144	0.0007281	-0.05872	0.002077	0.06475	5001	2000		pi.1[14602]	0.4868	0.2022	0.005058	0.02995	0.5104	0.8057	5001	2000
GRMZM2G386971	31	33	54	115		beta.i[34099]	0.000623	0.03188	0.0006924	-0.05915	0.0002853	0.06446	5001	2000		pi.1[34099]	0.5494	0.2197	0.004626	0.02995	0.5871	0.8718	5001	2000
GRMZM2G077002	26	35	104	128		beta.i[10897]	0.001335	0.03123	0.0008013	-0.06003	0.001212	0.06542	5001	2000		pi.1[10897]	0.5804	0.2209	0.005405	0.02996	0.6226	0.8839	5001	2000
GRMZM2G060467	61	36	76	109		beta.i[36139]	0.001076	0.03163	0.0008309	-0.06086	0.001222	0.06164	5001	2000		pi.1[36139]	0.5143	0.2115	0.004705	0.02998	0.5487	0.8321	5001	2000
GRMZM2G157589	49	39	72	103		beta.i[37279]	0.0007122	0.03127	0.000707	-0.05743	0.0007211	0.06104	5001	2000		pi.1[37279]	0.5292	0.2151	0.004079	0.03001	0.5602	0.8482	5001	2000
GRMZM2G157505	62	23	173	79		beta.i[33533]	0.001831	0.03146	0.0006793	-0.06281	0.001757	0.06116	5001	2000		pi.1[33533]	0.5066	0.2097	0.004045	0.03002	0.5353	0.8325	5001	2000
GRMZM2G147862	87	44	88	101		beta.i[25832]	0.0006229	0.03047	0.0007023	-0.05793	0.0007638	0.06216	5001	2000		pi.1[25832]	0.5114	0.2019	0.005099	0.03007	0.5461	0.8098	5001	2000
GRMZM5G847302	14	9	163	152		beta.i[8980]	0.001679	0.03201	0.0007299	-0.05959	0.001243	0.06626	5001	2000		pi.1[8980]	0.5916	0.2329	0.005276	0.03008	0.6404	0.9099	5001	2000
GRMZM2G152290	7	12	92	160		beta.i[12005]	0.001952	0.03145	0.0006077	-0.05827	0.001825	0.06331	5001	2000		pi.1[12005]	0.6419	0.2478	0.005904	0.03008	0.7017	0.9505	5001	2000
GRMZM2G180889	17	48	49	111		beta.i[6805]	0.000941	0.03166	0.0005704	-0.06249	0.001252	0.06122	5001	2000		pi.1[6805]	0.5822	0.2314	0.005121	0.03011	0.6251	0.9023	5001	2000
GRMZM2G528502	194	263	39	65		beta.i[18297]	0.0009206	0.03213	0.0007145	-0.06021	0.001352	0.06612	5001	2000		pi.1[18297]	0.473	0.1912	0.003698	0.03016	0.4987	0.7867	5001	2000
GRMZM2G170842	20	20	87	187		beta.i[21556]	0.002093	0.03117	0.0006595	-0.05769	0.001171	0.06342	5001	2000		pi.1[21556]	0.5887	0.2259	0.004949	0.03017	0.6315	0.891	5001	2000
GRMZM5G808624	54	14	160	263		beta.i[42008]	0.001334	0.03204	0.0005507	-0.06277	0.002194	0.06399	5001	2000		pi.1[42008]	0.5278	0.2102	0.004603	0.03017	0.5636	0.8397	5001	2000
GRMZM5G805350	27	40	41	162		beta.i[41988]	0.002449	0.03119	0.0008045	-0.05991	0.002458	0.06328	5001	2000		pi.1[41988]	0.5641	0.2209	0.005511	0.03022	0.6053	0.8771	5001	2000
GRMZM2G007907	121	33	100	310		beta.i[23823]	0.001705	0.03168	0.0006643	-0.05906	0.001545	0.0644	5001	2000		pi.1[23823]	0.5011	0.1949	0.004669	0.03025	0.5275	0.7929	5001	2000
GRMZM2G350031	33	91	52	38		beta.i[7190]	0.00116	0.0315	0.0008026	-0.06053	-0.0001345	0.06576	5001	2000		pi.1[7190]	0.5379	0.2209	0.005379	0.03027	0.5735	0.8639	5001	2000
GRMZM2G109680	39	66	93	38		beta.i[20727]	0.001679	0.03266	0.0007373	-0.05988	0.001815	0.06673	5001	2000		pi.1[20727]	0.5301	0.2139	0.004459	0.03039	0.559	0.8506	5001	2000
GRMZM2G013708	93	88	68	36		beta.i[14991]	0.0008797	0.03144	0.0005226	-0.06137	0.0004274	0.06153	5001	2000		pi.1[14991]	0.4911	0.205	0.005289	0.03041	0.5201	0.815	5001	2000
GRMZM2G084767	16	47	91	48		beta.i[29222]	0.0009015	0.03208	0.0006767	-0.06172	0.0008344	0.06433	5001	2000		pi.1[29222]	0.5876	0.228	0.005179	0.03055	0.6339	0.8962	5001	2000
GRMZM2G409839	5	4	175	214		beta.i[7601]	0.0009772	0.03143	0.0007765	-0.06252	0.00119	0.06162	5001	2000		pi.1[7601]	0.6661	0.2485	0.006003	0.03057	0.7215	0.9711	5001	2000
GRMZM5G877729	48	22	97	185		beta.i[14402]	0.0009159	0.03073	0.0007504	-0.0579	0.0005519	0.06235	5001	2000		pi.1[14402]	0.5314	0.2115	0.004485	0.03064	0.5674	0.8378	5001	2000
GRMZM2G546452	3	2	169	272		beta.i[31189]	0.001515	0.03187	0.0009274	-0.06056	0.001482	0.06595	5001	2000		pi.1[31189]	0.702	0.2645	0.00651	0.03073	0.7768	0.9894	5001	2000
AC233910.1_FG001	13	52	76	52		beta.i[9671]	0.0001443	0.03177	0.0007417	-0.06151	-0.00055	0.0646	5001	2000		pi.1[9671]	0.5986	0.2323	0.006024	0.03078	0.6464	0.9075	5001	2000
GRMZM2G035405	24	24	68	135		beta.i[24198]	0.001775	0.03133	0.0008039	-0.06035	0.002106	0.06376	5001	2000		pi.1[24198]	0.5651	0.2266	0.005002	0.03078	0.6015	0.8866	5001	2000
GRMZM2G142456	2	2	168	281		beta.i[29862]	-0.0002026	0.03182	0.0007483	-0.06039	-0.0003462	0.06324	5001	2000		pi.1[29862]	0.7196	0.2626	0.006183	0.03079	0.8034	0.9934	5001	2000
GRMZM2G063775	13	10	115	137		beta.i[10700]	0.0002984	0.03095	0.0006985	-0.06142	0.000444	0.06115	5001	2000		pi.1[10700]	0.5946	0.2399	0.005565	0.0308	0.6432	0.9106	5001	2000
GRMZM2G090929	4	4	174	158		beta.i[16082]	-3.79e-05	0.03145	0.0007085	-0.0601	0.0003701	0.06155	5001	2000		pi.1[16082]	0.6745	0.2587	0.006487	0.03088	0.7431	0.9774	5001	2000
GRMZM2G402228	260	196	48	36		beta.i[22232]	0.00138	0.03153	0.0007479	-0.06029	0.00112	0.06646	5001	2000		pi.1[22232]	0.4617	0.1889	0.003626	0.03103	0.4844	0.7675	5001	2000
GRMZM2G180931	72	44	109	111		beta.i[26307]	0.0006738	0.03138	0.0006928	-0.06087	0.0004795	0.06126	5001	2000		pi.1[26307]	0.5145	0.2056	0.005442	0.0311	0.5442	0.8245	5001	2000
GRMZM2G007053	18	27	80	60		beta.i[14926]	0.0007846	0.03162	0.0007158	-0.06144	0.001039	0.06355	5001	2000		pi.1[14926]	0.572	0.2338	0.004533	0.03111	0.6123	0.8995	5001	2000
GRMZM2G083749	48	5	478	423		beta.i[15986]	0.0002365	0.03094	0.0007582	-0.06253	0.0003347	0.06099	5001	2000		pi.1[15986]	0.5226	0.2141	0.005103	0.03117	0.5574	0.8362	5001	2000
GRMZM2G158277	31	44	92	74		beta.i[25964]	0.0004245	0.03148	0.0007163	-0.0607	0.00118	0.06128	5001	2000		pi.1[25964]	0.5561	0.2178	0.005095	0.03119	0.5941	0.8692	5001	2000
GRMZM2G151649	279	69	117	55		beta.i[33496]	0.002256	0.03189	0.0007495	-0.06105	0.001775	0.06393	5001	2000		pi.1[33496]	0.4606	0.1907	0.004605	0.03121	0.4759	0.7652	5001	2000
GRMZM2G010775	34	43	63	73		beta.i[14957]	0.0008586	0.03157	0.0007372	-0.06233	0.002122	0.06342	5001	2000		pi.1[14957]	0.54	0.2189	0.004555	0.03123	0.5739	0.854	5001	2000
GRMZM2G078320	12	31	77	109		beta.i[15910]	0.0007058	0.03133	0.0007412	-0.05907	-0.0006144	0.06283	5001	2000		pi.1[15910]	0.6178	0.2288	0.005671	0.03125	0.662	0.9242	5001	2000
GRMZM2G120353	79	26	111	140		beta.i[40466]	0.001245	0.03122	0.0005883	-0.05882	0.0005465	0.06316	5001	2000		pi.1[40466]	0.5038	0.2077	0.004924	0.03125	0.5321	0.8198	5001	2000
GRMZM2G166977	47	25	114	161		beta.i[12219]	0.0007209	0.0327	0.0006715	-0.06459	0.0007935	0.06491	5001	2000		pi.1[12219]	0.5399	0.2116	0.004366	0.03126	0.5781	0.853	5001	2000
GRMZM2G701180	7	30	120	72		beta.i[31325]	0.001978	0.03265	0.000774	-0.06047	0.001584	0.06688	5001	2000		pi.1[31325]	0.6468	0.2384	0.005975	0.03126	0.6989	0.9459	5001	2000
GRMZM2G005721	99	130	29	87		beta.i[19353]	0.001654	0.03172	0.0006831	-0.05944	0.001667	0.06331	5001	2000		pi.1[19353]	0.4846	0.2041	0.003851	0.03132	0.5102	0.807	5001	2000
GRMZM2G128880	53	32	110	102		beta.i[25542]	0.001615	0.03131	0.0006815	-0.06029	0.001535	0.06147	5001	2000		pi.1[25542]	0.5256	0.2081	0.003891	0.03137	0.5609	0.8339	5001	2000
GRMZM5G836205	4	9	80	109		beta.i[38813]	0.0006393	0.03232	0.0007119	-0.06178	0.0008876	0.06427	5001	2000		pi.1[38813]	0.6774	0.2584	0.005389	0.03141	0.7402	0.9832	5001	2000
GRMZM2G129615	36	27	106	95		beta.i[21015]	0.001293	0.03162	0.0008074	-0.06021	0.001039	0.06537	5001	2000		pi.1[21015]	0.5352	0.2224	0.005144	0.03143	0.5728	0.8688	5001	2000
GRMZM2G068519	5	8	68	358		beta.i[32672]	-0.0002146	0.03178	0.0006333	-0.06115	-0.001302	0.06677	5001	2000		pi.1[32672]	0.6905	0.2458	0.005833	0.0315	0.7576	0.9694	5001	2000
GRMZM2G030080	26	78	43	107		beta.i[15216]	0.001752	0.03081	0.0005891	-0.05886	0.001976	0.06312	5001	2000		pi.1[15216]	0.5587	0.2239	0.004372	0.03152	0.6004	0.8738	5001	2000
GRMZM2G047298	8	8	55	540		beta.i[15454]	0.0009339	0.03119	0.0007433	-0.06233	0.0006663	0.0644	5001	2000		pi.1[15454]	0.649	0.2448	0.006308	0.03157	0.7043	0.9464	5001	2000
GRMZM2G098175	4	10	119	146		beta.i[11212]	0.001021	0.03198	0.0005846	-0.0623	0.001658	0.06387	5001	2000		pi.1[11212]	0.6922	0.2524	0.006397	0.03163	0.7502	0.9775	5001	2000
GRMZM2G040720	27	60	67	78		beta.i[19797]	0.00141	0.03157	0.0006568	-0.05929	0.001499	0.06403	5001	2000		pi.1[19797]	0.5621	0.2244	0.005356	0.03163	0.6057	0.8813	5001	2000
GRMZM5G815147	123	22	253	173		beta.i[27712]	0.001077	0.03146	0.0007587	-0.06224	0.00144	0.06008	5001	2000		pi.1[27712]	0.4974	0.2006	0.004307	0.03166	0.5281	0.8197	5001	2000
GRMZM2G093962	4	24	83	55		beta.i[5163]	0.0007061	0.03085	0.0006429	-0.0599	0.0004665	0.06077	5001	2000		pi.1[5163]	0.6736	0.2556	0.006328	0.03172	0.7351	0.9733	5001	2000
GRMZM2G029856	41	31	95	128		beta.i[39570]	0.001925	0.03194	0.0008779	-0.06312	0.001461	0.0646	5001	2000		pi.1[39570]	0.5369	0.2196	0.004506	0.03172	0.5757	0.8578	5001	2000
GRMZM2G126936	28	28	123	80		beta.i[40525]	0.000858	0.03229	0.0007532	-0.06259	0.001232	0.06117	5001	2000		pi.1[40525]	0.5562	0.2244	0.004782	0.03174	0.5962	0.8748	5001	2000
GRMZM5G865959	10	8	115	194		beta.i[31610]	0.0008801	0.03172	0.0005715	-0.06103	0.0001818	0.0646	5001	2000		pi.1[31610]	0.6139	0.2422	0.004695	0.03176	0.6669	0.9277	5001	2000
rps15	227	127	68	50		beta.i[17979]	0.001319	0.03129	0.0007362	-0.05991	0.001457	0.06369	5001	2000		pi.1[17979]	0.4615	0.1948	0.004693	0.03178	0.4869	0.7761	5001	2000
GRMZM2G028452	3	4	160	182		beta.i[35761]	-0.001825	0.0317	0.000791	-0.06485	-0.002568	0.06026	5001	2000		pi.1[35761]	0.6972	0.263	0.00705	0.03183	0.7716	0.9893	5001	2000
GRMZM2G056697	62	27	106	118		beta.i[681]	0.002522	0.0314	0.0007394	-0.05965	0.002144	0.06798	5001	2000		pi.1[681]	0.5073	0.2158	0.005106	0.03188	0.5442	0.8329	5001	2000
GRMZM2G015925	26	36	108	73		beta.i[3642]	0.0005764	0.03166	0.0008342	-0.06264	0.001567	0.06395	5001	2000		pi.1[3642]	0.5629	0.2212	0.005489	0.03192	0.6006	0.8722	5001	2000
GRMZM2G032047	54	19	241	97		beta.i[3962]	0.0004956	0.03132	0.0007756	-0.05975	0.001371	0.05943	5001	2000		pi.1[3962]	0.5203	0.212	0.004287	0.032	0.5533	0.8347	5001	2000
GRMZM5G896294	36	45	49	72		beta.i[9363]	0.001271	0.03134	0.0008148	-0.06139	0.001931	0.05883	5001	2000		pi.1[9363]	0.5422	0.2227	0.004471	0.032	0.5816	0.8616	5001	2000
EFTS	33	62	65	35		beta.i[16156]	0.001989	0.03183	0.0006386	-0.06252	0.001674	0.06205	5001	2000		pi.1[16156]	0.5344	0.2175	0.004952	0.032	0.5688	0.8633	5001	2000
GRMZM2G027272	3	11	79	108		beta.i[10132]	0.001481	0.03163	0.0007395	-0.05877	0.001248	0.06459	5001	2000		pi.1[10132]	0.7093	0.2583	0.006501	0.03207	0.7899	0.9874	5001	2000
AC192362.3_FG003	12	23	113	119		beta.i[2979]	0.0006496	0.03106	0.0006408	-0.05975	0.000105	0.06063	5001	2000		pi.1[2979]	0.6149	0.2315	0.005917	0.03215	0.6683	0.9165	5001	2000
GRMZM2G075150	38	59	52	86		beta.i[24711]	0.002259	0.03185	0.0007742	-0.05954	0.002045	0.06422	5001	2000		pi.1[24711]	0.5435	0.2207	0.005121	0.03222	0.5843	0.8589	5001	2000
GRMZM2G148962	72	20	149	192		beta.i[25852]	0.002886	0.0316	0.000625	-0.05825	0.002315	0.06425	5001	2000		pi.1[25852]	0.515	0.2124	0.004157	0.03222	0.5483	0.8292	5001	2000
GRMZM5G872118	71	54	119	43		beta.i[9160]	0.00162	0.03204	0.0008026	-0.05826	0.0008532	0.06544	5001	2000		pi.1[9160]	0.4992	0.2124	0.004986	0.03226	0.529	0.8208	5001	2000
GRMZM5G876007	2	2	85	513		beta.i[2828]	0.000451	0.03156	0.0007105	-0.0601	0.0003548	0.06487	5001	2000		pi.1[2828]	0.7263	0.2551	0.006763	0.03238	0.8017	0.9919	5001	2000
GRMZM5G853962	4	7	120	174		beta.i[18784]	0.001515	0.03227	0.0007042	-0.05962	0.0007288	0.06643	5001	2000		pi.1[18784]	0.6896	0.2557	0.005658	0.03241	0.7568	0.9789	5001	2000
GRMZM2G076387	34	38	87	117		beta.i[32751]	0.002546	0.03155	0.0007044	-0.05969	0.002828	0.06368	5001	2000		pi.1[32751]	0.5571	0.2181	0.004638	0.03242	0.5941	0.8631	5001	2000
GRMZM2G008490	19	32	82	167		beta.i[3482]	0.0006934	0.03204	0.0006571	-0.06047	0.001318	0.06189	5001	2000		pi.1[3482]	0.5916	0.2279	0.004804	0.03244	0.6295	0.8961	5001	2000
GRMZM2G090500	6	12	59	235		beta.i[5084]	0.002663	0.0323	0.0008462	-0.06017	0.003005	0.06742	5001	2000		pi.1[5084]	0.6546	0.249	0.006083	0.03247	0.7142	0.9571	5001	2000
GRMZM2G356034	104	36	78	176		beta.i[21999]	0.001811	0.03065	0.0007027	-0.06024	0.001177	0.06294	5001	2000		pi.1[21999]	0.4929	0.205	0.003995	0.03249	0.5214	0.8045	5001	2000
GRMZM2G095898	264	62	88	104		beta.i[20534]	0.001341	0.03193	0.0007448	-0.05735	0.000898	0.06626	5001	2000		pi.1[20534]	0.4532	0.1916	0.004122	0.0325	0.4811	0.7613	5001	2000
GRMZM2G104410	13	31	63	125		beta.i[11315]	0.001886	0.03112	0.0007668	-0.06011	0.001795	0.06234	5001	2000		pi.1[11315]	0.6074	0.2309	0.004654	0.03256	0.6586	0.9106	5001	2000
GRMZM2G017894	7	19	54	139		beta.i[32133]	0.0004374	0.0309	0.0006189	-0.05918	0.0006873	0.06133	5001	2000		pi.1[32133]	0.6407	0.2494	0.00567	0.03264	0.7029	0.9488	5001	2000
GRMZM2G179281	33	33	57	74		beta.i[6776]	0.001072	0.03228	0.0006348	-0.06027	0.0005267	0.06429	5001	2000		pi.1[6776]	0.5408	0.2183	0.004843	0.03267	0.573	0.8537	5001	2000
AC197705.4_FG006	14	7	205	290		beta.i[35233]	0.001534	0.03196	0.0007481	-0.05898	0.001501	0.06523	5001	2000		pi.1[35233]	0.6033	0.2285	0.005189	0.03267	0.6512	0.9093	5001	2000
GRMZM2G303118	4	8	125	120		beta.i[12465]	0.001153	0.03147	0.0006175	-0.05745	0.0006367	0.06435	5001	2000		pi.1[12465]	0.6788	0.2612	0.005662	0.0327	0.7475	0.9821	5001	2000
GRMZM2G012238	11	9	140	165		beta.i[23877]	-0.0007716	0.03153	0.0007034	-0.05904	-0.001051	0.06319	5001	2000		pi.1[23877]	0.614	0.2375	0.004142	0.0327	0.6691	0.9238	5001	2000
GRMZM2G462625	11	21	68	134		beta.i[30982]	0.001936	0.0316	0.0006856	-0.06045	0.002801	0.06201	5001	2000		pi.1[30982]	0.6211	0.2331	0.00565	0.03277	0.665	0.9209	5001	2000
GRMZM2G141864	52	35	76	69		beta.i[29851]	0.002847	0.03192	0.0007129	-0.05775	0.003462	0.06676	5001	2000		pi.1[29851]	0.5181	0.2185	0.004273	0.03282	0.5508	0.8384	5001	2000
GRMZM2G027311	16	6	159	199		beta.i[15188]	0.0004225	0.03154	0.0005528	-0.06203	0.0003242	0.06477	5001	2000		pi.1[15188]	0.5813	0.2342	0.004143	0.03284	0.6295	0.8966	5001	2000
GRMZM2G171031	39	46	60	97		beta.i[40917]	0.002445	0.03109	0.0006756	-0.0572	0.002148	0.06247	5001	2000		pi.1[40917]	0.5456	0.2162	0.004189	0.03291	0.5798	0.8631	5001	2000
GRMZM2G324991	21	18	97	150		beta.i[33856]	0.0006988	0.0317	0.0008123	-0.06264	0.001246	0.0611	5001	2000		pi.1[33856]	0.5792	0.2246	0.006072	0.03298	0.622	0.8939	5001	2000
GRMZM2G037627	21	36	65	88		beta.i[32344]	0.001599	0.0319	0.0006637	-0.05796	0.001358	0.06545	5001	2000		pi.1[32344]	0.5752	0.2168	0.004792	0.03299	0.6125	0.8915	5001	2000
GRMZM2G330690	11	10	114	114		beta.i[33880]	0.001827	0.03137	0.0007496	-0.05971	0.001974	0.06185	5001	2000		pi.1[33880]	0.5934	0.2431	0.006078	0.03307	0.6439	0.9218	5001	2000
GRMZM2G068277	14	36	55	108		beta.i[24612]	0.001303	0.03155	0.0007113	-0.06055	0.001713	0.06337	5001	2000		pi.1[24612]	0.6001	0.2337	0.005877	0.03308	0.647	0.9098	5001	2000
GRMZM2G092627	5	6	167	144		beta.i[20502]	0.001238	0.03154	0.0006919	-0.06272	0.001872	0.06158	5001	2000		pi.1[20502]	0.6646	0.2525	0.006653	0.03309	0.7238	0.9708	5001	2000
GRMZM2G310321	350	64	126	119		beta.i[41079]	0.002319	0.03171	0.0009391	-0.05742	0.001043	0.06344	5001	2000		pi.1[41079]	0.4553	0.1835	0.003789	0.0331	0.4726	0.76	5001	2000
GRMZM5G849086	115	179	48	64		beta.i[27907]	0.001428	0.03161	0.00083	-0.06016	0.001669	0.06154	5001	2000		pi.1[27907]	0.493	0.1982	0.004422	0.03317	0.5175	0.7948	5001	2000
GRMZM2G009653	63	111	57	26		beta.i[9858]	0.0003834	0.03185	0.0007232	-0.06158	-0.0003609	0.06502	5001	2000		pi.1[9858]	0.5011	0.2084	0.004223	0.03322	0.5241	0.8286	5001	2000
GRMZM2G134023	14	83	63	37		beta.i[21074]	0.0006173	0.03203	0.0007451	-0.06167	-0.0003239	0.06424	5001	2000		pi.1[21074]	0.5837	0.234	0.00504	0.03324	0.6254	0.9068	5001	2000
GRMZM2G160151	92	34	129	136		beta.i[16928]	0.002338	0.03184	0.0006609	-0.05981	0.002797	0.06382	5001	2000		pi.1[16928]	0.5027	0.202	0.004897	0.03326	0.5291	0.8219	5001	2000
GRMZM2G099086	57	70	50	105		beta.i[32959]	0.001261	0.03264	0.0008042	-0.06311	0.0008051	0.06738	5001	2000		pi.1[32959]	0.5247	0.2133	0.005152	0.03326	0.5508	0.8326	5001	2000
GRMZM2G078314	17	32	90	84		beta.i[15909]	0.0009933	0.03147	0.0007163	-0.06028	1.276e-05	0.06232	5001	2000		pi.1[15909]	0.589	0.2245	0.004642	0.0333	0.6267	0.8971	5001	2000
GRMZM2G156255	133	21	317	115		beta.i[30003]	0.0007417	0.03186	0.0006765	-0.06115	0.001141	0.06226	5001	2000		pi.1[30003]	0.487	0.1983	0.00439	0.03338	0.5124	0.8035	5001	2000
GRMZM2G402242	40	25	110	70		beta.i[26866]	0.00107	0.03174	0.0006845	-0.06124	0.0006161	0.06426	5001	2000		pi.1[26866]	0.5361	0.2175	0.005174	0.03344	0.57	0.8554	5001	2000
GRMZM2G329069	22	114	47	41		beta.i[17359]	0.001388	0.03211	0.0007241	-0.06106	0.001376	0.06715	5001	2000		pi.1[17359]	0.5628	0.2236	0.004669	0.03358	0.6043	0.879	5001	2000
ycf72-1	19	23	92	106		beta.i[1100]	0.002116	0.03143	0.0007713	-0.06124	0.003058	0.06292	5001	2000		pi.1[1100]	0.5884	0.2303	0.005486	0.03364	0.6433	0.896	5001	2000
AC212728.3_FG001	17	115	38	45		beta.i[23648]	0.001921	0.03159	0.0007059	-0.05884	0.001886	0.06307	5001	2000		pi.1[23648]	0.5792	0.2312	0.005009	0.03364	0.6199	0.893	5001	2000
GRMZM2G051842	14	28	65	167		beta.i[36049]	0.001068	0.03182	0.0008973	-0.05828	0.0003773	0.06449	5001	2000		pi.1[36049]	0.6068	0.2299	0.005723	0.03366	0.6482	0.9154	5001	2000
GRMZM2G093598	37	42	58	81		beta.i[40177]	0.002947	0.03142	0.0005915	-0.05863	0.002479	0.06242	5001	2000		pi.1[40177]	0.5359	0.2143	0.004756	0.03378	0.5656	0.8604	5001	2000
GRMZM2G100084	22	25	81	124		beta.i[5274]	0.000529	0.0308	0.0006544	-0.05929	-1.268e-05	0.06215	5001	2000		pi.1[5274]	0.5733	0.2271	0.005459	0.03381	0.6236	0.8857	5001	2000
GRMZM2G371606	38	12	171	215		beta.i[17614]	0.000184	0.03105	0.0006961	-0.06248	0.0004923	0.0598	5001	2000		pi.1[17614]	0.5413	0.2188	0.004874	0.03382	0.582	0.8581	5001	2000
GRMZM2G353885	30	32	91	94		beta.i[33964]	0.001345	0.03299	0.0008544	-0.06364	0.001485	0.06655	5001	2000		pi.1[33964]	0.5558	0.2219	0.004948	0.03388	0.5989	0.8773	5001	2000
GRMZM2G127756	70	45	90	143		beta.i[16517]	0.001549	0.03138	0.0007263	-0.06141	0.001243	0.0647	5001	2000		pi.1[16517]	0.5205	0.2073	0.003844	0.0339	0.552	0.8187	5001	2000
GRMZM2G474755	30	75	83	84		beta.i[38321]	0.0008735	0.03203	0.0007241	-0.06073	0.001313	0.06463	5001	2000		pi.1[38321]	0.5639	0.2196	0.005074	0.03393	0.6102	0.8674	5001	2000
GRMZM5G839429	79	98	51	57		beta.i[42125]	0.001493	0.03165	0.0006951	-0.06043	0.001324	0.06148	5001	2000		pi.1[42125]	0.5029	0.2099	0.005393	0.03396	0.5378	0.82	5001	2000
GRMZM2G367907	8	5	213	206		beta.i[30580]	0.0003385	0.0323	0.0008502	-0.06274	0.001374	0.06187	5001	2000		pi.1[30580]	0.631	0.2417	0.005428	0.03397	0.6904	0.9331	5001	2000
GRMZM2G474370	2	3	271	235		beta.i[34465]	0.0002037	0.03161	0.000661	-0.0614	0.0003159	0.06262	5001	2000		pi.1[34465]	0.7182	0.2607	0.005921	0.034	0.7977	0.9928	5001	2000
AC190816.3_FG002	82	127	66	44		beta.i[19083]	0.001266	0.03177	0.0006959	-0.06041	0.001564	0.06274	5001	2000		pi.1[19083]	0.5067	0.2049	0.003739	0.03408	0.5378	0.8218	5001	2000
GRMZM2G014979	42	69	91	31		beta.i[15018]	0.000553	0.03144	0.0006248	-0.06144	0.0006901	0.06338	5001	2000		pi.1[15018]	0.5262	0.2184	0.005512	0.03416	0.564	0.8471	5001	2000
GRMZM2G077015	12	3	244	572		beta.i[15887]	0.0003748	0.03281	0.0007334	-0.06419	0.0002357	0.06249	5001	2000		pi.1[15887]	0.6184	0.2343	0.004913	0.03417	0.6674	0.9239	5001	2000
GRMZM5G811567	77	63	122	50		beta.i[14002]	0.00309	0.03124	0.0007735	-0.056	0.002056	0.06538	5001	2000		pi.1[14002]	0.5086	0.2046	0.004885	0.03418	0.5352	0.8229	5001	2000
GRMZM2G008647	35	39	84	106		beta.i[23826]	0.0008795	0.03177	0.0007636	-0.06042	0.0008405	0.06038	5001	2000		pi.1[23826]	0.5508	0.2225	0.005202	0.03427	0.5877	0.8628	5001	2000
GRMZM2G380665	35	42	137	74		beta.i[7412]	0.001686	0.03167	0.000873	-0.06035	0.001324	0.06488	5001	2000		pi.1[7412]	0.5542	0.2149	0.00519	0.03431	0.593	0.8584	5001	2000
GRMZM2G173682	20	31	103	99		beta.i[1639]	0.0001242	0.03145	0.0007521	-0.05919	0.000197	0.06492	5001	2000		pi.1[1639]	0.5901	0.2201	0.005702	0.03432	0.6394	0.8919	5001	2000
GRMZM2G162598	123	32	112	176		beta.i[33585]	0.002564	0.03155	0.0006707	-0.05967	0.001796	0.06396	5001	2000		pi.1[33585]	0.4934	0.2031	0.004223	0.03433	0.523	0.8051	5001	2000
GRMZM2G099253	43	53	80	47		beta.i[32961]	0.000713	0.03221	0.0006594	-0.05923	9.344e-05	0.06348	5001	2000		pi.1[32961]	0.5339	0.2158	0.004041	0.03436	0.5709	0.855	5001	2000
AC199315.4_FG001	42	24	129	97		beta.i[35252]	0.0009172	0.03171	0.0006417	-0.06408	0.001319	0.06186	5001	2000		pi.1[35252]	0.5455	0.2145	0.004074	0.03438	0.5828	0.8587	5001	2000
GRMZM2G025387	19	29	51	128		beta.i[35727]	0.00144	0.03084	0.0007408	-0.05958	0.00141	0.06237	5001	2000		pi.1[35727]	0.5721	0.2337	0.00576	0.03442	0.6184	0.903	5001	2000
GRMZM2G119722	29	55	38	90		beta.i[36843]	0.00156	0.03167	0.0007638	-0.05595	0.0018	0.0632	5001	2000		pi.1[36843]	0.5461	0.2199	0.004644	0.03452	0.583	0.8636	5001	2000
GRMZM5G819794	7	18	56	119		beta.i[23039]	0.001006	0.03169	0.0007531	-0.06081	9.148e-05	0.06483	5001	2000		pi.1[23039]	0.6415	0.2407	0.005781	0.03454	0.6928	0.9476	5001	2000
GRMZM2G005710	153	88	71	33		beta.i[35514]	0.001046	0.03033	0.0005886	-0.06082	0.001128	0.06147	5001	2000		pi.1[35514]	0.4649	0.1993	0.004074	0.03455	0.4906	0.7854	5001	2000
GRMZM2G158972	47	22	121	116		beta.i[30047]	0.00167	0.03096	0.0007068	-0.0595	0.001019	0.06397	5001	2000		pi.1[30047]	0.5254	0.2166	0.004583	0.03458	0.5618	0.8474	5001	2000
GRMZM2G170653	6	5	159	171		beta.i[30173]	0.00163	0.03194	0.0006964	-0.06229	0.002446	0.06348	5001	2000		pi.1[30173]	0.6535	0.2488	0.005591	0.0346	0.7137	0.9558	5001	2000
GRMZM2G496011	56	71	64	117		beta.i[34525]	0.001615	0.03166	0.0008129	-0.06077	0.001702	0.06316	5001	2000		pi.1[34525]	0.531	0.2089	0.004219	0.03464	0.5669	0.8404	5001	2000
GRMZM5G868823	11	34	108	45		beta.i[18859]	0.001246	0.03043	0.000757	-0.05878	0.001435	0.05974	5001	2000		pi.1[18859]	0.6033	0.2349	0.005176	0.03466	0.6514	0.9268	5001	2000
GRMZM2G028108	22	31	80	91		beta.i[24102]	0.001163	0.03105	0.000581	-0.06038	0.001121	0.06218	5001	2000		pi.1[24102]	0.5685	0.2277	0.006004	0.03467	0.6041	0.883	5001	2000
GRMZM5G802212	231	252	61	28		beta.i[8642]	0.00156	0.03214	0.000783	-0.06173	0.001839	0.06433	5001	2000		pi.1[8642]	0.4644	0.1891	0.004035	0.03481	0.4916	0.7603	5001	2000
GRMZM2G457003	12	19	63	166		beta.i[13438]	0.0004201	0.03164	0.0006394	-0.05955	-0.0006459	0.06332	5001	2000		pi.1[13438]	0.6107	0.2323	0.004235	0.03483	0.6561	0.9187	5001	2000
GRMZM2G019260	33	25	95	111		beta.i[3709]	0.002071	0.03159	0.0007141	-0.05887	0.001319	0.06459	5001	2000		pi.1[3709]	0.5529	0.2218	0.004681	0.03485	0.5946	0.8724	5001	2000
GRMZM5G848712	351	126	67	40		beta.i[31535]	0.0002273	0.03211	0.0007762	-0.06035	-0.0007231	0.06471	5001	2000		pi.1[31535]	0.4416	0.1838	0.003665	0.03486	0.4589	0.7544	5001	2000
AC217811.3_FG003	23	13	104	171		beta.i[19252]	0.0008268	0.03077	0.0006488	-0.0592	0.0004728	0.06102	5001	2000		pi.1[19252]	0.5664	0.2296	0.004935	0.03496	0.6069	0.8872	5001	2000
GRMZM2G127299	33	39	115	108		beta.i[29673]	0.001155	0.0313	0.0007559	-0.0585	0.0005533	0.06375	5001	2000		pi.1[29673]	0.5554	0.2155	0.005318	0.03496	0.5977	0.8599	5001	2000
GRMZM2G358051	13	18	130	102		beta.i[12821]	0.002184	0.03332	0.0007658	-0.06396	0.00235	0.06739	5001	2000		pi.1[12821]	0.6005	0.2321	0.005345	0.03501	0.6468	0.922	5001	2000
GRMZM5G893392	296	33	86	257		beta.i[28175]	0.0005223	0.03186	0.0007653	-0.0612	0.000117	0.06394	5001	2000		pi.1[28175]	0.4515	0.1898	0.004648	0.03508	0.4727	0.7604	5001	2000
GRMZM2G039993	57	54	38	204		beta.i[39679]	0.0005038	0.03172	0.0007449	-0.06094	0.0004046	0.06128	5001	2000		pi.1[39679]	0.5239	0.2104	0.004685	0.03508	0.5452	0.8396	5001	2000
GRMZM2G060872	15	45	58	81		beta.i[10658]	0.001044	0.03118	0.0007035	-0.06076	0.001642	0.06233	5001	2000		pi.1[10658]	0.5969	0.2259	0.005069	0.03522	0.6427	0.9067	5001	2000
GRMZM2G124365	60	39	66	163		beta.i[36892]	0.002354	0.03173	0.0006558	-0.06001	0.002996	0.06537	5001	2000		pi.1[36892]	0.5202	0.2067	0.004229	0.03523	0.55	0.8308	5001	2000
GRMZM2G123838	62	110	51	62		beta.i[5752]	0.001347	0.03154	0.0005952	-0.05986	0.0009198	0.06643	5001	2000		pi.1[5752]	0.521	0.2093	0.004327	0.03525	0.5514	0.8283	5001	2000
GRMZM2G137495	9	28	49	81		beta.i[25678]	-0.0003612	0.03175	0.0006223	-0.05999	-0.001245	0.06074	5001	2000		pi.1[25678]	0.6069	0.2408	0.00361	0.03526	0.6511	0.9285	5001	2000
GRMZM2G065696	114	47	153	78		beta.i[39928]	0.001664	0.03157	0.0007628	-0.05977	0.002243	0.06251	5001	2000		pi.1[39928]	0.4955	0.2025	0.004348	0.03532	0.5187	0.816	5001	2000
GRMZM2G141299	4	49	61	68		beta.i[16687]	0.001929	0.03147	0.0006107	-0.05896	0.002119	0.0632	5001	2000		pi.1[16687]	0.6714	0.2607	0.006665	0.03542	0.7382	0.9757	5001	2000
GRMZM2G324863	71	36	121	90		beta.i[21858]	0.002766	0.03173	0.0007341	-0.05754	0.003169	0.06741	5001	2000		pi.1[21858]	0.5114	0.2061	0.004761	0.03545	0.5421	0.8245	5001	2000
GRMZM2G323828	2	4	154	168		beta.i[12598]	0.0006896	0.03109	0.0006532	-0.05863	0.0005372	0.06187	5001	2000		pi.1[12598]	0.7134	0.2617	0.006279	0.03559	0.7925	0.9924	5001	2000
GRMZM2G055370	24	42	122	73		beta.i[10587]	0.0007942	0.0318	0.0006402	-0.06071	0.001095	0.0624	5001	2000		pi.1[10587]	0.574	0.2245	0.00447	0.03566	0.6138	0.8876	5001	2000
GRMZM2G126290	38	35	77	118		beta.i[33231]	0.001804	0.0311	0.0007219	-0.05788	0.002401	0.06322	5001	2000		pi.1[33231]	0.535	0.2211	0.004772	0.03567	0.5722	0.8536	5001	2000
GRMZM2G392932	31	36	82	60		beta.i[17719]	0.001691	0.03044	0.000607	-0.05919	0.001979	0.06275	5001	2000		pi.1[17719]	0.556	0.218	0.005102	0.03572	0.5932	0.8762	5001	2000
GRMZM2G120329	37	60	91	48		beta.i[25398]	0.00191	0.0319	0.0008044	-0.06034	0.00213	0.06161	5001	2000		pi.1[25398]	0.5322	0.2129	0.004016	0.03579	0.5611	0.8566	5001	2000
GRMZM2G124421	27	47	90	89		beta.i[40501]	0.0014	0.03215	0.0008174	-0.06258	0.001852	0.06486	5001	2000		pi.1[40501]	0.5697	0.2216	0.004481	0.03581	0.6102	0.8775	5001	2000
rpl2-A	12	20	80	83		beta.i[2095]	0.001258	0.03234	0.0007453	-0.06309	0.0008917	0.06426	5001	2000		pi.1[2095]	0.5996	0.2398	0.004797	0.03589	0.6442	0.919	5001	2000
GRMZM2G082809	122	45	79	156		beta.i[10998]	0.001552	0.03201	0.0007202	-0.06072	0.001308	0.06302	5001	2000		pi.1[10998]	0.4878	0.1995	0.00507	0.03596	0.5154	0.7956	5001	2000
GRMZM2G479760	16	6	155	222		beta.i[27292]	0.001168	0.03089	0.0006788	-0.0585	0.001792	0.06302	5001	2000		pi.1[27292]	0.5694	0.2363	0.005918	0.03609	0.6119	0.9025	5001	2000
GRMZM2G028763	15	41	85	82		beta.i[24111]	0.001893	0.03138	0.0006623	-0.05782	0.002088	0.06292	5001	2000		pi.1[24111]	0.6002	0.2315	0.003833	0.03611	0.6481	0.909	5001	2000
GRMZM2G124243	38	25	127	123		beta.i[25461]	0.001205	0.03139	0.0006358	-0.05983	0.0007716	0.06399	5001	2000		pi.1[25461]	0.5434	0.2168	0.0053	0.03611	0.5832	0.8611	5001	2000
GRMZM2G090419	10	32	56	127		beta.i[24944]	-0.0005467	0.03105	0.0006286	-0.06263	-0.0004159	0.05938	5001	2000		pi.1[24944]	0.62	0.2432	0.005734	0.03612	0.6798	0.9301	5001	2000
GRMZM2G051288	28	49	47	124		beta.i[15513]	0.00228	0.03206	0.0007607	-0.06029	0.002734	0.06795	5001	2000		pi.1[15513]	0.5534	0.2229	0.005848	0.03617	0.5906	0.8703	5001	2000
tha9	155	68	72	111		beta.i[25534]	0.0003352	0.03073	0.0008716	-0.06119	0.0007935	0.06198	5001	2000		pi.1[25534]	0.4818	0.1976	0.00401	0.03617	0.5052	0.7968	5001	2000
GRMZM2G047486	56	44	70	100		beta.i[10455]	0.0007335	0.03175	0.0008303	-0.06123	0.0009564	0.06533	5001	2000		pi.1[10455]	0.5208	0.213	0.0045	0.03627	0.5538	0.8357	5001	2000
GRMZM2G139657	29	41	72	108		beta.i[29821]	0.001458	0.03147	0.0008484	-0.05953	0.002451	0.06412	5001	2000		pi.1[29821]	0.5532	0.2212	0.005592	0.03629	0.5914	0.8688	5001	2000
GRMZM2G304638	140	126	51	57		beta.i[6861]	0.001063	0.03246	0.0005415	-0.06412	0.00137	0.06672	5001	2000		pi.1[6861]	0.4816	0.1978	0.004873	0.03635	0.5082	0.7891	5001	2000
GRMZM2G004188	42	54	58	85		beta.i[9781]	0.002256	0.03143	0.0006824	-0.05943	0.002544	0.0678	5001	2000		pi.1[9781]	0.5348	0.2155	0.00621	0.03647	0.571	0.8553	5001	2000
GRMZM2G587327	41	41	102	56		beta.i[31283]	0.001319	0.03157	0.0008098	-0.06054	0.00136	0.06257	5001	2000		pi.1[31283]	0.5326	0.2136	0.00558	0.03647	0.5611	0.8562	5001	2000
GRMZM2G156916	38	55	114	70		beta.i[30019]	0.002117	0.03159	0.0006803	-0.05859	0.002171	0.0636	5001	2000		pi.1[30019]	0.5472	0.2161	0.004433	0.03656	0.5856	0.8557	5001	2000
GRMZM2G340456	25	28	99	135		beta.i[33917]	0.001189	0.0317	0.0008066	-0.0613	0.00116	0.06231	5001	2000		pi.1[33917]	0.5737	0.2245	0.004296	0.03663	0.6136	0.8868	5001	2000
GRMZM2G427097	5	13	91	86		beta.i[2172]	0.001956	0.03144	0.0007048	-0.06062	0.002238	0.06184	5001	2000		pi.1[2172]	0.6626	0.2538	0.005704	0.03665	0.7282	0.9654	5001	2000
GRMZM2G045507	58	46	94	105		beta.i[604]	0.001123	0.03106	0.0006782	-0.06134	0.001746	0.06002	5001	2000		pi.1[604]	0.5244	0.209	0.004688	0.03674	0.5587	0.8385	5001	2000
GRMZM2G033555	70	55	81	111		beta.i[39608]	0.002264	0.03178	0.0007585	-0.0626	0.002035	0.06322	5001	2000		pi.1[39608]	0.5123	0.2082	0.004669	0.03674	0.5376	0.8325	5001	2000
GRMZM2G442675	401	60	70	131		beta.i[17971]	0.001723	0.03133	0.0007463	-0.06007	0.001003	0.06374	5001	2000		pi.1[17971]	0.444	0.1852	0.004831	0.03676	0.4623	0.7475	5001	2000
GRMZM2G057743	17	29	84	77		beta.i[39848]	0.0007847	0.03083	0.0006456	-0.0604	3.853e-05	0.0625	5001	2000		pi.1[39848]	0.591	0.226	0.004891	0.03676	0.6388	0.8983	5001	2000
GRMZM2G138583	46	96	99	30		beta.i[25697]	0.0009512	0.03196	0.0006423	-0.06495	0.002158	0.05904	5001	2000		pi.1[25697]	0.5316	0.2109	0.004655	0.0368	0.5619	0.8452	5001	2000
AC198982.3_FG006	2	3	118	231		beta.i[35244]	0.0006532	0.03125	0.0006702	-0.06063	0.001252	0.06161	5001	2000		pi.1[35244]	0.715	0.2698	0.006758	0.03684	0.7983	0.9941	5001	2000
GRMZM2G063859	331	234	43	52		beta.i[24547]	0.002203	0.03218	0.0007263	-0.06052	0.001845	0.06507	5001	2000		pi.1[24547]	0.4494	0.1843	0.003686	0.03686	0.4687	0.748	5001	2000
GRMZM2G150264	27	24	64	130		beta.i[29953]	0.001916	0.03076	0.0007581	-0.05837	0.001856	0.06448	5001	2000		pi.1[29953]	0.5647	0.2233	0.005443	0.03691	0.6045	0.8781	5001	2000
GRMZM2G031660	4	17	49	134		beta.i[494]	0.0009262	0.03192	0.0006626	-0.06153	-0.0003734	0.06383	5001	2000		pi.1[494]	0.6802	0.2597	0.005487	0.03694	0.7501	0.9781	5001	2000
AC209206.3_FG011	9	7	104	178		beta.i[130]	0.0007051	0.0312	0.0007615	-0.06206	0.001665	0.05997	5001	2000		pi.1[130]	0.6178	0.2419	0.005516	0.037	0.6653	0.9348	5001	2000
GRMZM2G022041	23	95	75	26		beta.i[10048]	0.0008616	0.03219	0.0006072	-0.06265	0.000384	0.06496	5001	2000		pi.1[10048]	0.564	0.2203	0.005188	0.037	0.6068	0.8731	5001	2000
pBrp	58	45	86	103		beta.i[39474]	0.001521	0.03113	0.0007214	-0.05872	0.001889	0.06221	5001	2000		pi.1[39474]	0.524	0.2125	0.00484	0.03701	0.5527	0.831	5001	2000
GRMZM2G080320	21	103	59	48		beta.i[15933]	0.002239	0.03153	0.0005516	-0.06173	0.003145	0.06551	5001	2000		pi.1[15933]	0.5701	0.2261	0.005153	0.03703	0.6136	0.8904	5001	2000
GRMZM2G047748	12	27	96	105		beta.i[621]	-0.0003734	0.03224	0.0007705	-0.06371	-7.938e-05	0.06385	5001	2000		pi.1[621]	0.6165	0.2297	0.005444	0.03705	0.666	0.9242	5001	2000
GRMZM2G407146	103	48	125	81		beta.i[13124]	0.0001396	0.03271	0.0008396	-0.06299	0.0006236	0.06422	5001	2000		pi.1[13124]	0.4888	0.2045	0.004196	0.03707	0.5164	0.8035	5001	2000
GRMZM5G849796	4	3	189	209		beta.i[27915]	0.0003068	0.03143	0.0006298	-0.063	0.0005632	0.06159	5001	2000		pi.1[27915]	0.6754	0.2609	0.00581	0.0371	0.749	0.9772	5001	2000
GRMZM2G301246	24	31	102	84		beta.i[1746]	-2.001e-05	0.03176	0.0006181	-0.0627	-0.0008016	0.0652	5001	2000		pi.1[1746]	0.5696	0.2195	0.005494	0.03712	0.6069	0.8775	5001	2000
GRMZM2G120690	4	7	122	140		beta.i[16431]	0.00118	0.03164	0.0006416	-0.05931	0.001265	0.06242	5001	2000		pi.1[16431]	0.6893	0.2538	0.006415	0.03712	0.7592	0.9842	5001	2000
GRMZM2G160902	26	14	136	164		beta.i[16935]	0.0008218	0.03166	0.0006411	-0.06036	0.0004396	0.06258	5001	2000		pi.1[16935]	0.5651	0.2189	0.004837	0.03714	0.6011	0.8595	5001	2000
GRMZM5G881498	29	50	58	75		beta.i[23307]	0.0005526	0.0313	0.0007372	-0.06061	0.0009106	0.0615	5001	2000		pi.1[23307]	0.5526	0.2206	0.005787	0.03714	0.5957	0.8711	5001	2000
GRMZM2G083538	412	52	157	172		beta.i[4959]	0.002051	0.03192	0.0008673	-0.06007	0.00202	0.06778	5001	2000		pi.1[4959]	0.4607	0.1794	0.003745	0.03726	0.4816	0.7503	5001	2000
GRMZM2G429560	226	102	43	72		beta.i[17902]	0.001411	0.03146	0.0007303	-0.0603	0.00107	0.06582	5001	2000		pi.1[17902]	0.4537	0.1931	0.004982	0.03732	0.474	0.7666	5001	2000
GRMZM2G013790	15	19	81	147		beta.i[14993]	0.00121	0.03183	0.0007044	-0.06188	0.001267	0.06583	5001	2000		pi.1[14993]	0.6039	0.2294	0.005467	0.03738	0.6524	0.9087	5001	2000
GRMZM2G135165	17	41	81	108		beta.i[29771]	0.001976	0.03276	0.000733	-0.06054	0.001571	0.06675	5001	2000		pi.1[29771]	0.596	0.2262	0.004778	0.03738	0.6381	0.8968	5001	2000
GRMZM2G122811	51	81	98	50		beta.i[20900]	0.0008812	0.03084	0.0005887	-0.06159	0.001582	0.06004	5001	2000		pi.1[20900]	0.5236	0.2128	0.004194	0.0374	0.5561	0.8384	5001	2000
GRMZM2G476448	78	258	44	29		beta.i[22601]	0.001642	0.0318	0.0006787	-0.05714	0.001144	0.06559	5001	2000		pi.1[22601]	0.5045	0.2024	0.004059	0.0374	0.5327	0.8262	5001	2000
GRMZM2G333045	30	36	91	58		beta.i[37698]	0.0005695	0.03145	0.0006607	-0.06082	0.0005628	0.06231	5001	2000		pi.1[37698]	0.5512	0.2205	0.005069	0.0374	0.5931	0.8677	5001	2000
GRMZM2G169116	143	26	149	276		beta.i[37420]	0.0006112	0.03256	0.00062	-0.0649	0.0006084	0.06506	5001	2000		pi.1[37420]	0.4971	0.1966	0.004283	0.03755	0.5246	0.8001	5001	2000
GRMZM2G171748	10	7	142	296		beta.i[12287]	0.0002604	0.03115	0.0006657	-0.05979	0.0001787	0.06018	5001	2000		pi.1[12287]	0.6381	0.2356	0.005412	0.03757	0.6981	0.9333	5001	2000
GRMZM2G046474	17	104	31	129		beta.i[10437]	0.002154	0.03216	0.0006569	-0.06106	0.002732	0.06415	5001	2000		pi.1[10437]	0.593	0.2262	0.004623	0.03759	0.6331	0.9055	5001	2000
GRMZM5G857327	76	105	38	68		beta.i[34967]	0.0008009	0.03067	0.0008258	-0.05856	0.0006788	0.06367	5001	2000		pi.1[34967]	0.4951	0.2105	0.004601	0.03764	0.5169	0.8186	5001	2000
GRMZM2G072837	12	32	51	114		beta.i[15839]	0.0005019	0.03166	0.0008214	-0.0613	8.262e-05	0.06496	5001	2000		pi.1[15839]	0.605	0.2373	0.004477	0.03767	0.6564	0.9242	5001	2000
GRMZM2G121510	30	46	78	91		beta.i[36857]	0.000473	0.03063	0.0007192	-0.05821	0.0007559	0.06091	5001	2000		pi.1[36857]	0.5565	0.2206	0.005609	0.0377	0.5985	0.8671	5001	2000
GRMZM2G375420	68	258	25	35		beta.i[12937]	0.001178	0.03182	0.0005987	-0.05914	0.0008327	0.06351	5001	2000		pi.1[12937]	0.4944	0.2061	0.004617	0.03774	0.5192	0.8131	5001	2000
GRMZM2G108085	12	45	58	110		beta.i[25191]	-8.77e-05	0.03186	0.0007121	-0.06488	0.0002386	0.06108	5001	2000		pi.1[25191]	0.6121	0.2293	0.00415	0.03777	0.6562	0.9186	5001	2000
GRMZM2G021107	30	76	63	82		beta.i[10024]	0.0009735	0.03121	0.0006401	-0.06018	0.0005675	0.06599	5001	2000		pi.1[10024]	0.5589	0.2179	0.005861	0.03778	0.5963	0.8714	5001	2000
GRMZM2G471160	19	55	57	87		beta.i[13526]	0.001189	0.0311	0.0006643	-0.05722	0.001512	0.06143	5001	2000		pi.1[13526]	0.5829	0.2253	0.005154	0.03779	0.6248	0.8924	5001	2000
GRMZM5G887277	45	73	60	34		beta.i[35073]	0.001936	0.03141	0.0005692	-0.05988	0.002386	0.06558	5001	2000		pi.1[35073]	0.5218	0.2154	0.005198	0.0378	0.5479	0.8515	5001	2000
GRMZM2G169462	20	34	69	94		beta.i[21540]	0.001837	0.03191	0.0006437	-0.0616	0.002602	0.06254	5001	2000		pi.1[21540]	0.5745	0.2238	0.004997	0.03787	0.6099	0.894	5001	2000
GRMZM2G365961	11	27	49	151		beta.i[30571]	0.0001648	0.03106	0.0006768	-0.06039	-0.0009779	0.06115	5001	2000		pi.1[30571]	0.6095	0.2383	0.005299	0.03792	0.6568	0.9229	5001	2000
GRMZM2G003852	14	39	61	69		beta.i[9774]	0.0002705	0.03187	0.0007896	-0.06032	0.0005377	0.06148	5001	2000		pi.1[9774]	0.5916	0.2287	0.006446	0.03794	0.6292	0.9087	5001	2000
GRMZM2G018971	27	66	75	66		beta.i[28595]	0.001058	0.03186	0.0007014	-0.06207	0.001432	0.06345	5001	2000		pi.1[28595]	0.5582	0.2223	0.004649	0.03795	0.5921	0.8751	5001	2000
GRMZM5G830873	2	4	127	230		beta.i[34871]	0.0001264	0.03185	0.0007582	-0.06234	-6.012e-05	0.06507	5001	2000		pi.1[34871]	0.7357	0.255	0.005679	0.03795	0.8065	0.9946	5001	2000
GRMZM2G034471	127	317	154	7		beta.i[10226]	0.002389	0.03133	0.0008958	-0.05867	0.00182	0.06365	5001	2000		pi.1[10226]	0.4795	0.1907	0.0037	0.03799	0.5018	0.7755	5001	2000
GRMZM2G015588	33	75	47	64		beta.i[3635]	0.0002703	0.03252	0.0006943	-0.06363	0.000863	0.06212	5001	2000		pi.1[3635]	0.5395	0.2194	0.005502	0.038	0.5683	0.8572	5001	2000
GRMZM5G893976	40	35	68	61		beta.i[39070]	7.318e-05	0.0308	0.0005893	-0.0614	0.0004991	0.05935	5001	2000		pi.1[39070]	0.5268	0.2192	0.004674	0.03802	0.5613	0.8502	5001	2000
GRMZM5G876881	445	878	47	6		beta.i[42295]	0.002834	0.03215	0.0009013	-0.06109	0.003071	0.06512	5001	2000		pi.1[42295]	0.4321	0.1733	0.00388	0.03805	0.4484	0.7258	5001	2000
GRMZM2G059393	34	35	55	107		beta.i[15627]	0.0003572	0.03162	0.0007012	-0.06042	0.0004069	0.0625	5001	2000		pi.1[15627]	0.5445	0.2215	0.004636	0.03806	0.5777	0.8713	5001	2000
GRMZM2G105330	7	20	63	130		beta.i[11330]	0.000993	0.0314	0.0005933	-0.06088	0.0007687	0.06086	5001	2000		pi.1[11330]	0.6439	0.2487	0.005062	0.0381	0.7053	0.9508	5001	2000
GRMZM2G095511	25	42	80	110		beta.i[5187]	0.001377	0.03061	0.0005937	-0.05464	0.0003202	0.0623	5001	2000		pi.1[5187]	0.573	0.218	0.005333	0.03819	0.6124	0.8803	5001	2000
GRMZM2G030762	89	33	100	170		beta.i[35802]	0.0021	0.03203	0.0006828	-0.06054	0.001391	0.06534	5001	2000		pi.1[35802]	0.5067	0.2037	0.004463	0.03831	0.5372	0.8223	5001	2000
GRMZM2G022782	14	24	71	135		beta.i[35694]	-0.001163	0.03147	0.000784	-0.06061	-0.001095	0.06069	5001	2000		pi.1[35694]	0.6075	0.2268	0.005914	0.03834	0.6439	0.9088	5001	2000
GRMZM2G031536	5	9	79	219		beta.i[10186]	0.0005639	0.0309	0.0006859	-0.06005	4.085e-05	0.0626	5001	2000		pi.1[10186]	0.6765	0.252	0.00644	0.03836	0.7364	0.9693	5001	2000
GRMZM2G052630	260	57	188	116		beta.i[36054]	0.001622	0.03076	0.0007108	-0.06034	0.0014	0.06008	5001	2000		pi.1[36054]	0.4725	0.184	0.003724	0.03836	0.4907	0.7658	5001	2000
GRMZM2G172183	31	25	103	143		beta.i[6640]	-0.0003348	0.0321	0.0006924	-0.06253	-0.0001816	0.0632	5001	2000		pi.1[6640]	0.5643	0.2201	0.004848	0.03837	0.6108	0.8662	5001	2000
GRMZM2G340278	14	15	115	117		beta.i[33915]	0.0001928	0.03088	0.0008023	-0.06113	0.0009206	0.0618	5001	2000		pi.1[33915]	0.5901	0.2332	0.006836	0.03837	0.6388	0.9099	5001	2000
GRMZM2G089359	126	31	254	102		beta.i[40123]	0.002632	0.03207	0.0007621	-0.06056	0.002683	0.06514	5001	2000		pi.1[40123]	0.4854	0.1955	0.004475	0.03841	0.5142	0.789	5001	2000
GRMZM2G093987	31	38	88	85		beta.i[40181]	0.00209	0.03158	0.0006799	-0.06124	0.003228	0.06552	5001	2000		pi.1[40181]	0.5605	0.2167	0.005288	0.03843	0.5986	0.8718	5001	2000
GRMZM2G121117	82	45	124	120		beta.i[36855]	0.002461	0.03126	0.0006347	-0.05561	0.002147	0.06438	5001	2000		pi.1[36855]	0.5212	0.2077	0.00493	0.03845	0.5497	0.8418	5001	2000
GRMZM2G170699	60	41	110	63		beta.i[6614]	0.001182	0.03178	0.0007493	-0.06173	0.001672	0.06362	5001	2000		pi.1[6614]	0.5167	0.2067	0.00391	0.03855	0.5444	0.8349	5001	2000
AC211357.4_FG004	11	38	56	90		beta.i[23630]	0.0008526	0.03216	0.0006281	-0.0583	0.0005509	0.06485	5001	2000		pi.1[23630]	0.6018	0.2325	0.004422	0.03855	0.6453	0.92	5001	2000
GRMZM2G049909	6	3	385	271		beta.i[24378]	0.002064	0.03082	0.0007101	-0.05804	0.002316	0.06346	5001	2000		pi.1[24378]	0.6472	0.2454	0.007393	0.03855	0.6991	0.9613	5001	2000
GRMZM2G051374	46	45	103	81		beta.i[19942]	0.0002108	0.03161	0.0007812	-0.06377	0.000838	0.05951	5001	2000		pi.1[19942]	0.536	0.2106	0.004067	0.03863	0.5672	0.8568	5001	2000
GRMZM5G876664	38	62	67	114		beta.i[42292]	0.0002594	0.03103	0.0007007	-0.05791	0.0005309	0.06262	5001	2000		pi.1[42292]	0.5601	0.2128	0.004553	0.03865	0.5915	0.8773	5001	2000
GRMZM2G701055	3	21	36	140		beta.i[31315]	0.001001	0.03179	0.0006678	-0.06221	0.0009423	0.06245	5001	2000		pi.1[31315]	0.693	0.2636	0.00662	0.03866	0.7611	0.9822	5001	2000
GRMZM2G393752	61	42	102	162		beta.i[41383]	0.00183	0.03165	0.0007252	-0.06207	0.002179	0.06208	5001	2000		pi.1[41383]	0.5341	0.206	0.005217	0.03866	0.5689	0.8424	5001	2000
GRMZM2G516614	275	305	36	28		beta.i[31127]	0.0002463	0.03122	0.0007639	-0.05983	-0.0001964	0.06288	5001	2000		pi.1[31127]	0.4488	0.189	0.003822	0.03867	0.4568	0.7674	5001	2000
GRMZM2G140390	75	32	134	108		beta.i[6049]	0.001732	0.03119	0.0008088	-0.05698	0.0009408	0.06344	5001	2000		pi.1[6049]	0.5024	0.2075	0.00452	0.0387	0.5297	0.814	5001	2000
GRMZM2G057783	67	36	102	119		beta.i[28968]	0.001634	0.03227	0.0007566	-0.06497	0.001396	0.06482	5001	2000		pi.1[28968]	0.5252	0.2093	0.004596	0.0387	0.5567	0.8336	5001	2000
GRMZM2G118062	4	2	198	398		beta.i[5650]	0.0004423	0.03191	0.0007047	-0.06254	0.0007498	0.06189	5001	2000		pi.1[5650]	0.6878	0.2657	0.006803	0.03876	0.766	0.98	5001	2000
GRMZM2G078200	7	18	68	122		beta.i[4855]	-0.000261	0.03141	0.0007073	-0.06146	-0.0008436	0.06158	5001	2000		pi.1[4855]	0.6461	0.2463	0.005512	0.03878	0.7071	0.9469	5001	2000
GRMZM2G059865	42	58	53	118		beta.i[4510]	0.002836	0.03206	0.0006965	-0.05905	0.003532	0.06356	5001	2000		pi.1[4510]	0.5432	0.2192	0.005084	0.03881	0.5847	0.8514	5001	2000
GRMZM2G148810	238	57	144	119		beta.i[29931]	-1.913e-05	0.03228	0.0008004	-0.06201	-0.0006716	0.06331	5001	2000		pi.1[29931]	0.4706	0.1918	0.004282	0.03883	0.4948	0.7767	5001	2000
GRMZM2G093171	52	37	79	142		beta.i[5138]	0.001616	0.03097	0.0006573	-0.06031	0.002053	0.06304	5001	2000		pi.1[5138]	0.5328	0.2139	0.004335	0.03889	0.5675	0.8486	5001	2000
GRMZM2G055880	72	152	73	43		beta.i[4417]	0.001127	0.03163	0.0006122	-0.0592	0.001452	0.06416	5001	2000		pi.1[4417]	0.52	0.2019	0.005106	0.03891	0.552	0.8197	5001	2000
GRMZM2G098648	57	45	72	120		beta.i[32956]	0.001725	0.03186	0.0008064	-0.06332	0.001856	0.06286	5001	2000		pi.1[32956]	0.524	0.2076	0.004423	0.03891	0.5603	0.8327	5001	2000
GRMZM2G064584	28	22	94	124		beta.i[20112]	0.001073	0.03221	0.0006362	-0.06332	0.001125	0.06522	5001	2000		pi.1[20112]	0.5607	0.2184	0.004566	0.03892	0.6016	0.874	5001	2000
GRMZM2G045668	9	7	147	210		beta.i[4235]	0.0002775	0.03192	0.0006639	-0.06235	0.0005049	0.06406	5001	2000		pi.1[4235]	0.6319	0.2322	0.005237	0.03893	0.6814	0.9364	5001	2000
GRMZM2G410990	14	38	64	73		beta.i[7610]	0.0004894	0.03234	0.0006685	-0.06555	0.000684	0.06539	5001	2000		pi.1[7610]	0.5927	0.2349	0.005117	0.03894	0.6415	0.9095	5001	2000
AC197555.3_FG008	16	16	124	120		beta.i[14640]	0.001695	0.03179	0.0007649	-0.06207	0.0007722	0.06381	5001	2000		pi.1[14640]	0.595	0.2307	0.005856	0.03901	0.6381	0.9061	5001	2000
GRMZM2G308203	23	17	79	166		beta.i[26357]	0.00102	0.03142	0.0006614	-0.05871	0.0005251	0.06106	5001	2000		pi.1[26357]	0.5669	0.222	0.00533	0.03909	0.6038	0.8783	5001	2000
GRMZM2G012088	39	45	91	75		beta.i[9903]	0.0002852	0.03169	0.0006412	-0.06163	-0.00069	0.06202	5001	2000		pi.1[9903]	0.5401	0.2133	0.004844	0.03916	0.5809	0.8609	5001	2000
GRMZM2G129828	19	9	166	151		beta.i[40556]	0.001348	0.03174	0.0005854	-0.06072	0.001027	0.06289	5001	2000		pi.1[40556]	0.5744	0.227	0.005226	0.03918	0.6095	0.8941	5001	2000
AC194937.3_FG004	11	13	244	131		beta.i[23474]	0.001297	0.03189	0.0007363	-0.06181	0.0009268	0.06636	5001	2000		pi.1[23474]	0.6139	0.2372	0.005424	0.03921	0.664	0.9198	5001	2000
GRMZM2G155332	48	42	116	127		beta.i[29995]	0.000656	0.03201	0.0007922	-0.06189	0.001423	0.06137	5001	2000		pi.1[29995]	0.5426	0.2098	0.005602	0.03924	0.5774	0.8452	5001	2000
GRMZM5G848608	35	40	93	95		beta.i[14213]	0.002387	0.03163	0.0005647	-0.0589	0.002656	0.0636	5001	2000		pi.1[14213]	0.5498	0.2146	0.004272	0.03928	0.5878	0.8659	5001	2000
GRMZM2G046861	13	22	48	196		beta.i[613]	0.002225	0.03157	0.0008994	-0.05904	0.002087	0.06434	5001	2000		pi.1[613]	0.6099	0.2305	0.005329	0.0393	0.6566	0.9153	5001	2000
GRMZM5G842503	180	326	47	46		beta.i[38840]	0.0001962	0.03156	0.0007513	-0.06117	-0.0001748	0.06055	5001	2000		pi.1[38840]	0.4789	0.1889	0.004285	0.03935	0.4999	0.7941	5001	2000
GRMZM2G110881	129	33	175	151		beta.i[25240]	0.001634	0.03147	0.0007857	-0.05853	0.001253	0.06593	5001	2000		pi.1[25240]	0.4905	0.1948	0.004343	0.03937	0.5142	0.8028	5001	2000
GRMZM2G145330	47	49	58	327		beta.i[40684]	0.002365	0.03181	0.0006493	-0.06183	0.002014	0.06583	5001	2000		pi.1[40684]	0.5631	0.2088	0.003851	0.03937	0.5966	0.8499	5001	2000
GRMZM2G012021	32	32	75	125		beta.i[28529]	0.001405	0.03128	0.0006515	-0.06246	0.00213	0.06131	5001	2000		pi.1[28529]	0.55	0.218	0.004751	0.0394	0.5913	0.8667	5001	2000
GRMZM2G101053	27	60	60	52		beta.i[36631]	0.0008409	0.03175	0.0007565	-0.06088	0.001565	0.06407	5001	2000		pi.1[36631]	0.5496	0.2243	0.005221	0.03946	0.5932	0.8769	5001	2000
GRMZM2G069201	33	26	86	148		beta.i[15776]	-0.0001223	0.03121	0.0008035	-0.06308	-0.0001846	0.06021	5001	2000		pi.1[15776]	0.5469	0.2194	0.00488	0.03948	0.5819	0.8645	5001	2000
GRMZM5G844094	182	68	91	100		beta.i[31510]	0.002845	0.0321	0.0008722	-0.06062	0.002795	0.06394	5001	2000		pi.1[31510]	0.4739	0.1918	0.004639	0.03956	0.4971	0.7894	5001	2000
GRMZM2G088653	36	46	109	92		beta.i[16058]	0.001835	0.03168	0.0008492	-0.05945	0.00165	0.06359	5001	2000		pi.1[16058]	0.5571	0.2122	0.004558	0.0396	0.5924	0.8595	5001	2000
GRMZM5G889708	18	50	53	81		beta.i[9308]	0.0006644	0.03073	0.0007933	-0.05868	0.0008224	0.06178	5001	2000		pi.1[9308]	0.5726	0.2301	0.005156	0.03961	0.6196	0.8809	5001	2000
GRMZM2G003875	38	21	108	148		beta.i[35482]	0.0001147	0.03105	0.0007572	-0.05884	-0.0003621	0.06461	5001	2000		pi.1[35482]	0.5437	0.2223	0.004083	0.03964	0.5869	0.8563	5001	2000
GRMZM2G078806	3	9	113	152		beta.i[4867]	0.0005557	0.03109	0.0007467	-0.06158	0.000968	0.06282	5001	2000		pi.1[4867]	0.7124	0.2578	0.006937	0.03966	0.7856	0.9877	5001	2000
GRMZM2G030839	12	25	66	94		beta.i[39584]	0.002073	0.03122	0.0007005	-0.06045	0.001759	0.06351	5001	2000		pi.1[39584]	0.608	0.2324	0.005163	0.03969	0.6561	0.9141	5001	2000
HMT-1	32	45	100	82		beta.i[39293]	0.002452	0.03167	0.0007915	-0.05874	0.002313	0.06456	5001	2000		pi.1[39293]	0.5563	0.2169	0.004796	0.03973	0.595	0.8714	5001	2000
GRMZM2G516809	67	102	42	61		beta.i[8325]	0.0009323	0.03149	0.000579	-0.06089	0.001432	0.06119	5001	2000		pi.1[8325]	0.5087	0.2083	0.005013	0.03976	0.5324	0.8282	5001	2000
GRMZM5G883903	18	24	76	104		beta.i[42319]	-0.0002907	0.03185	0.0007234	-0.06322	-0.000149	0.06282	5001	2000		pi.1[42319]	0.5843	0.2249	0.004745	0.04	0.6261	0.8997	5001	2000
GRMZM2G318633	13	24	81	84		beta.i[26412]	0.0004063	0.03136	0.0007068	-0.06343	0.001252	0.06234	5001	2000		pi.1[26412]	0.5967	0.2307	0.005284	0.04002	0.6458	0.9093	5001	2000
GRMZM2G032711	39	40	118	47		beta.i[32295]	0.001236	0.03234	0.0007228	-0.06167	0.001346	0.06494	5001	2000		pi.1[32295]	0.5355	0.216	0.004802	0.04008	0.5698	0.8578	5001	2000
GRMZM2G303559	242	71	148	152		beta.i[26333]	0.001836	0.03218	0.000867	-0.06359	0.00253	0.06439	5001	2000		pi.1[26333]	0.4813	0.1884	0.004489	0.0401	0.5055	0.783	5001	2000
GRMZM2G444178	198	18	298	290		beta.i[7876]	0.001696	0.03218	0.0005219	-0.06174	0.001529	0.06565	5001	2000		pi.1[7876]	0.4733	0.1945	0.004517	0.04014	0.5025	0.7781	5001	2000
GRMZM2G107524	2	3	90	362		beta.i[25185]	0.0008751	0.03153	0.0005697	-0.05834	0.0005891	0.06312	5001	2000		pi.1[25185]	0.7348	0.2568	0.005703	0.04016	0.8176	0.9923	5001	2000
GRMZM2G084609	3	8	92	188		beta.i[24851]	0.0004044	0.03197	0.0006631	-0.06259	0.0004914	0.06373	5001	2000		pi.1[24851]	0.7187	0.2541	0.006304	0.04018	0.7983	0.9881	5001	2000
GRMZM5G832989	7	29	39	117		beta.i[27808]	0.0005516	0.03097	0.0005594	-0.05734	-0.0005565	0.06348	5001	2000		pi.1[27808]	0.6366	0.2458	0.006015	0.04021	0.6941	0.9491	5001	2000
GRMZM2G071771	26	17	97	182		beta.i[10817]	0.002052	0.03213	0.0006005	-0.06344	0.002502	0.06793	5001	2000		pi.1[10817]	0.563	0.2225	0.005047	0.04025	0.5965	0.8814	5001	2000
GRMZM2G474092	5	8	79	158		beta.i[22590]	0.001474	0.03062	0.00068	-0.05676	0.001081	0.06087	5001	2000		pi.1[22590]	0.6559	0.2576	0.006569	0.04025	0.7188	0.9707	5001	2000
GRMZM2G589187	236	70	84	175		beta.i[2555]	0.001803	0.03166	0.0006875	-0.05724	0.001441	0.06409	5001	2000		pi.1[2555]	0.476	0.1884	0.003388	0.04029	0.4941	0.7811	5001	2000
GRMZM2G038988	18	63	38	135		beta.i[4072]	5.266e-06	0.03235	0.0007128	-0.06335	0.0004849	0.06561	5001	2000		pi.1[4072]	0.5874	0.2237	0.005176	0.0403	0.6216	0.904	5001	2000
GRMZM2G129118	27	61	84	40		beta.i[25553]	0.001185	0.03153	0.0006909	-0.06109	0.001098	0.06463	5001	2000		pi.1[25553]	0.5481	0.222	0.005087	0.04041	0.5885	0.8648	5001	2000
GRMZM2G169064	121	86	65	66		beta.i[30155]	0.001752	0.03141	0.0007527	-0.05976	0.001691	0.06381	5001	2000		pi.1[30155]	0.4949	0.1943	0.004269	0.04042	0.5204	0.8015	5001	2000
GRMZM2G127853	74	17	154	214		beta.i[40532]	0.001491	0.03024	0.0005458	-0.05605	0.001271	0.06015	5001	2000		pi.1[40532]	0.5068	0.2084	0.00535	0.04043	0.5357	0.8282	5001	2000
GRMZM2G026742	21	47	46	82		beta.i[39531]	0.0009204	0.03152	0.0006221	-0.05972	0.0008484	0.06302	5001	2000		pi.1[39531]	0.5624	0.2267	0.004411	0.04047	0.5986	0.8843	5001	2000
GRMZM2G178346	214	57	68	95		beta.i[37527]	0.001195	0.03071	0.0005757	-0.05783	0.0007873	0.0618	5001	2000		pi.1[37527]	0.4571	0.1942	0.004264	0.04061	0.4804	0.7684	5001	2000
GRMZM2G331752	129	92	51	66		beta.i[7061]	0.001713	0.03224	0.000639	-0.06292	0.001783	0.06325	5001	2000		pi.1[7061]	0.4824	0.1998	0.004275	0.04064	0.5075	0.7908	5001	2000
GRMZM2G139407	14	31	96	93		beta.i[1360]	0.0008067	0.03137	0.0007534	-0.0598	-0.0002735	0.06215	5001	2000		pi.1[1360]	0.6036	0.2329	0.005333	0.04067	0.6485	0.9112	5001	2000
GRMZM2G178102	16	47	41	92		beta.i[17141]	-0.00026	0.03062	0.000626	-0.0616	-0.0001659	0.06206	5001	2000		pi.1[17141]	0.5854	0.2371	0.006	0.04069	0.6382	0.9025	5001	2000
GRMZM2G025366	115	11	404	378		beta.i[437]	0.002124	0.03184	0.0007417	-0.05755	0.001558	0.06624	5001	2000		pi.1[437]	0.5009	0.1989	0.00461	0.04075	0.5261	0.8079	5001	2000
GRMZM2G106653	9	8	170	204		beta.i[25175]	0.001567	0.03157	0.0008253	-0.05949	0.001206	0.06037	5001	2000		pi.1[25175]	0.6272	0.2424	0.005906	0.04082	0.6747	0.937	5001	2000
GRMZM2G347798	8	34	47	79		beta.i[41226]	0.001624	0.03146	0.0006599	-0.06054	0.001516	0.06348	5001	2000		pi.1[41226]	0.6181	0.248	0.00564	0.04082	0.669	0.9387	5001	2000
GRMZM2G121074	35	38	144	73		beta.i[11548]	0.0003475	0.03027	0.000722	-0.05502	0.0001789	0.06059	5001	2000		pi.1[11548]	0.5515	0.2141	0.004659	0.04084	0.591	0.8546	5001	2000
GRMZM2G079470	180	23	205	252		beta.i[4880]	0.001068	0.03185	0.0007463	-0.05998	0.001081	0.06491	5001	2000		pi.1[4880]	0.477	0.1964	0.004527	0.04087	0.4978	0.7974	5001	2000
AC226235.2_FG003	8	6	249	142		beta.i[14809]	0.001692	0.03086	0.0006146	-0.05874	0.001679	0.06593	5001	2000		pi.1[14809]	0.6251	0.2429	0.004541	0.0409	0.6762	0.937	5001	2000
GRMZM2G386817	27	51	84	59		beta.i[26779]	0.0007797	0.03108	0.0007212	-0.06164	-6.551e-05	0.05929	5001	2000		pi.1[26779]	0.5581	0.2187	0.005856	0.04091	0.5959	0.874	5001	2000
GRMZM2G180668	29	39	105	126		beta.i[37560]	0.003002	0.03247	0.0008313	-0.06156	0.003584	0.06616	5001	2000		pi.1[37560]	0.563	0.2146	0.004762	0.04104	0.5986	0.8715	5001	2000
GRMZM2G031609	25	23	117	127		beta.i[19694]	0.0005798	0.03156	0.0007942	-0.06181	0.00128	0.06001	5001	2000		pi.1[19694]	0.5731	0.2175	0.004326	0.04111	0.6145	0.8817	5001	2000
GRMZM2G589579	4	29	61	120		beta.i[38588]	0.001313	0.03211	0.0008088	-0.06328	0.0005743	0.06713	5001	2000		pi.1[38588]	0.6881	0.2495	0.005674	0.04112	0.7571	0.9727	5001	2000
GRMZM2G081915	102	24	135	121		beta.i[4926]	0.002322	0.0307	0.00069	-0.05716	0.002682	0.06403	5001	2000		pi.1[4926]	0.4889	0.2054	0.005186	0.0412	0.518	0.8055	5001	2000
PDIL5-3	44	41	78	130		beta.i[1663]	0.001381	0.03147	0.0007215	-0.06008	0.001933	0.06056	5001	2000		pi.1[1663]	0.5467	0.2099	0.005124	0.04124	0.5764	0.8496	5001	2000
GRMZM2G148194	81	40	101	226		beta.i[11929]	0.001395	0.03214	0.0006443	-0.05857	0.001503	0.06584	5001	2000		pi.1[11929]	0.5221	0.2001	0.005096	0.04126	0.5529	0.8296	5001	2000
GRMZM2G546834	44	19	110	208		beta.i[34640]	4.462e-05	0.03219	0.0006525	-0.06451	-0.0005238	0.06702	5001	2000		pi.1[34640]	0.5462	0.2182	0.005189	0.04128	0.5837	0.855	5001	2000
GRMZM5G869403	18	39	76	122		beta.i[31627]	0.000609	0.0318	0.0006726	-0.06106	0.0005611	0.06151	5001	2000		pi.1[31627]	0.5906	0.2265	0.004891	0.04132	0.6383	0.8912	5001	2000
GRMZM2G495064	61	140	44	32		beta.i[34523]	0.000607	0.03096	0.000636	-0.06305	0.000513	0.06092	5001	2000		pi.1[34523]	0.5065	0.2061	0.004332	0.04147	0.5276	0.8237	5001	2000
HSP26	41	57	119	37		beta.i[6226]	0.001214	0.03164	0.0005897	-0.06112	0.001279	0.06277	5001	2000		pi.1[6226]	0.5298	0.2122	0.004559	0.04148	0.562	0.8506	5001	2000
GRMZM2G366910	58	206	65	42		beta.i[26650]	0.001763	0.0314	0.0007393	-0.05985	0.002346	0.06163	5001	2000		pi.1[26650]	0.5241	0.2027	0.004263	0.04148	0.554	0.8373	5001	2000
GRMZM2G066169	72	43	128	115		beta.i[10738]	0.00249	0.03143	0.0006866	-0.05835	0.002547	0.06422	5001	2000		pi.1[10738]	0.5334	0.2027	0.004884	0.04154	0.5658	0.8343	5001	2000
GRMZM2G155943	11	32	54	59		beta.i[30000]	4.445e-05	0.03121	0.0007801	-0.05856	-0.0001118	0.06492	5001	2000		pi.1[30000]	0.5991	0.2339	0.006447	0.04157	0.6425	0.9205	5001	2000
GRMZM5G863420	163	57	110	72		beta.i[31599]	0.001884	0.03052	0.00073	-0.05689	0.001299	0.06051	5001	2000		pi.1[31599]	0.4819	0.1957	0.004861	0.04158	0.5058	0.7846	5001	2000
hypro4	43	56	82	86		beta.i[39898]	-0.0001086	0.03113	0.0007524	-0.06109	-0.0003604	0.0629	5001	2000		pi.1[39898]	0.5369	0.2157	0.005612	0.04158	0.5692	0.8569	5001	2000
GRMZM2G084325	67	420	25	23		beta.i[11027]	0.0004637	0.03241	0.0006642	-0.0637	0.00056	0.06327	5001	2000		pi.1[11027]	0.4921	0.2079	0.005068	0.04166	0.5213	0.8192	5001	2000
GRMZM2G380650	35	42	137	76		beta.i[7411]	0.00114	0.03188	0.0007311	-0.06197	0.0003306	0.06352	5001	2000		pi.1[7411]	0.5532	0.2122	0.003653	0.04167	0.5905	0.8534	5001	2000
GRMZM2G460861	18	50	50	78		beta.i[8031]	0.001335	0.03172	0.0008238	-0.06134	0.001373	0.06185	5001	2000		pi.1[8031]	0.5744	0.2315	0.005332	0.0417	0.6186	0.9002	5001	2000
GRMZM2G001033	19	40	57	83		beta.i[23737]	0.002289	0.03229	0.0008592	-0.06072	0.002058	0.0642	5001	2000		pi.1[23737]	0.5803	0.2269	0.005664	0.04174	0.6232	0.8859	5001	2000
GRMZM2G071917	3	5	101	301		beta.i[24660]	0.002	0.03153	0.0006569	-0.05802	0.002667	0.0639	5001	2000		pi.1[24660]	0.7176	0.2555	0.005883	0.04176	0.789	0.9907	5001	2000
GRMZM2G337094	7	64	63	41		beta.i[26511]	0.001616	0.03124	0.0006616	-0.05676	0.0009704	0.06495	5001	2000		pi.1[26511]	0.6337	0.2396	0.004369	0.04184	0.685	0.9438	5001	2000
GRMZM2G156581	78	46	83	104		beta.i[12065]	0.001388	0.03175	0.0006254	-0.06079	0.001357	0.06324	5001	2000		pi.1[12065]	0.5079	0.2044	0.005019	0.04187	0.535	0.8201	5001	2000
GRMZM2G058560	54	49	90	81		beta.i[39863]	0.0007025	0.03142	0.0006024	-0.05938	0.0006021	0.06169	5001	2000		pi.1[39863]	0.5295	0.2074	0.003569	0.04187	0.5601	0.8299	5001	2000
GRMZM2G066578	9	47	107	56		beta.i[24586]	0.002554	0.0325	0.0005558	-0.06267	0.002672	0.06762	5001	2000		pi.1[24586]	0.6274	0.2337	0.004741	0.0419	0.6793	0.9312	5001	2000
GRMZM2G057031	29	32	84	97		beta.i[20018]	0.001502	0.03126	0.000744	-0.05643	0.001379	0.06137	5001	2000		pi.1[20018]	0.5557	0.2207	0.004276	0.042	0.592	0.8677	5001	2000
GRMZM2G142528	208	143	39	72		beta.i[16707]	0.00237	0.0315	0.00079	-0.05988	0.002366	0.06735	5001	2000		pi.1[16707]	0.4674	0.1949	0.004685	0.04201	0.483	0.7763	5001	2000
GRMZM2G112285	3	4	160	250		beta.i[1127]	0.002053	0.03184	0.0007504	-0.05992	0.001468	0.06626	5001	2000		pi.1[1127]	0.7147	0.257	0.006447	0.04203	0.7904	0.99	5001	2000
GRMZM2G168281	47	70	56	94		beta.i[40896]	0.002085	0.03171	0.000672	-0.05785	0.002321	0.06522	5001	2000		pi.1[40896]	0.5287	0.2142	0.005097	0.04205	0.5591	0.8514	5001	2000
GRMZM5G831519	7	12	120	131		beta.i[38785]	0.0008799	0.0306	0.0007004	-0.05993	0.000838	0.06257	5001	2000		pi.1[38785]	0.6529	0.2391	0.005686	0.04209	0.7117	0.9434	5001	2000
GRMZM2G514569	178	170	43	63		beta.i[18263]	0.001359	0.03202	0.0007517	-0.05936	0.00203	0.06446	5001	2000		pi.1[18263]	0.4758	0.1875	0.00454	0.04218	0.4995	0.7711	5001	2000
GRMZM2G109547	289	49	107	134		beta.i[11397]	0.002706	0.03133	0.0007063	-0.05987	0.002811	0.0634	5001	2000		pi.1[11397]	0.4541	0.1904	0.00488	0.0422	0.4748	0.7609	5001	2000
GRMZM5G866619	125	165	46	63		beta.i[28019]	0.001807	0.03122	0.0006481	-0.06003	0.001671	0.06335	5001	2000		pi.1[28019]	0.4919	0.1952	0.004337	0.0422	0.5144	0.8047	5001	2000
GRMZM5G874397	55	31	131	122		beta.i[42280]	0.001435	0.03158	0.0006502	-0.05942	0.001911	0.06243	5001	2000		pi.1[42280]	0.526	0.2102	0.005013	0.04224	0.5566	0.8426	5001	2000
GRMZM2G013794	40	18	121	228		beta.i[32101]	0.0009241	0.03151	0.0006983	-0.05889	0.0003873	0.06068	5001	2000		pi.1[32101]	0.5491	0.2175	0.005065	0.04228	0.5837	0.8606	5001	2000
GRMZM2G001661	11	14	87	153		beta.i[3346]	0.001549	0.03197	0.0006501	-0.05895	0.0008586	0.06742	5001	2000		pi.1[3346]	0.6156	0.2332	0.005629	0.04231	0.6679	0.9254	5001	2000
GRMZM2G023438	56	43	73	90		beta.i[32192]	-0.0002435	0.03192	0.0006698	-0.06105	-0.0002831	0.06194	5001	2000		pi.1[32192]	0.5187	0.2123	0.005169	0.04232	0.5457	0.8421	5001	2000
GRMZM2G305569	5	16	67	167		beta.i[21745]	0.0009801	0.03096	0.0006574	-0.05946	0.001794	0.0633	5001	2000		pi.1[21745]	0.6765	0.2482	0.004688	0.04243	0.7397	0.9713	5001	2000
GRMZM2G076537	43	37	63	121		beta.i[4812]	0.001557	0.03162	0.0007111	-0.05795	0.001072	0.06604	5001	2000		pi.1[4812]	0.5361	0.2168	0.005348	0.04246	0.5752	0.8536	5001	2000
GRMZM2G349943	151	124	39	46		beta.i[37773]	0.002692	0.03174	0.0006241	-0.05863	0.002895	0.06528	5001	2000		pi.1[37773]	0.4715	0.1974	0.00363	0.04247	0.4942	0.7938	5001	2000
GRMZM5G887940	101	100	67	53		beta.i[9292]	0.0008374	0.03229	0.0005823	-0.0616	0.0006379	0.06304	5001	2000		pi.1[9292]	0.4973	0.1968	0.004446	0.0425	0.5211	0.802	5001	2000
AC205703.4_FG002	301	39	152	243		beta.i[23545]	0.0007328	0.03174	0.0007978	-0.0617	0.0003973	0.0614	5001	2000		pi.1[23545]	0.4684	0.1878	0.00449	0.04251	0.4943	0.7667	5001	2000
GRMZM2G146887	38	30	99	117		beta.i[16761]	0.001847	0.03251	0.0005765	-0.06135	0.002524	0.0663	5001	2000		pi.1[16761]	0.5464	0.2173	0.004757	0.04255	0.5833	0.8587	5001	2000
GRMZM2G002425	40	43	89	72		beta.i[31985]	0.001254	0.03188	0.0007891	-0.05918	0.001139	0.06572	5001	2000		pi.1[31985]	0.5377	0.2145	0.005263	0.04257	0.574	0.8556	5001	2000
GRMZM2G099454	19	19	87	102		beta.i[5259]	0.002396	0.03151	0.0007494	-0.05865	0.003336	0.06481	5001	2000		pi.1[5259]	0.5688	0.2327	0.005027	0.04261	0.6145	0.8959	5001	2000
GRMZM2G160541	22	17	46	418		beta.i[21423]	0.001501	0.03171	0.0009456	-0.05925	0.002537	0.06417	5001	2000		pi.1[21423]	0.5887	0.2239	0.00463	0.04275	0.6331	0.8888	5001	2000
GRMZM2G054225	209	38	255	145		beta.i[10577]	0.001275	0.03125	0.0007527	-0.05854	0.001183	0.06428	5001	2000		pi.1[10577]	0.4811	0.1909	0.004457	0.04283	0.5065	0.7849	5001	2000
GRMZM2G006042	50	61	133	47		beta.i[263]	0.0006854	0.03163	0.0006931	-0.05887	0.0008183	0.064	5001	2000		pi.1[263]	0.5327	0.213	0.005085	0.0429	0.5653	0.8425	5001	2000
GRMZM2G304915	13	15	103	178		beta.i[1757]	0.002328	0.03071	0.0007961	-0.05835	0.002413	0.06189	5001	2000		pi.1[1757]	0.6124	0.231	0.005209	0.04291	0.6615	0.9145	5001	2000
GRMZM2G556131	24	48	87	82		beta.i[13802]	0.0006763	0.03169	0.0007027	-0.06172	0.0007118	0.06246	5001	2000		pi.1[13802]	0.5709	0.2205	0.004538	0.04291	0.6079	0.8805	5001	2000
GRMZM2G546081	35	39	95	108		beta.i[8416]	0.0006108	0.0317	0.000706	-0.06075	-0.0004085	0.06343	5001	2000		pi.1[8416]	0.5555	0.2129	0.00507	0.04299	0.5914	0.8633	5001	2000
GRMZM2G134618	47	20	185	107		beta.i[16606]	0.001416	0.03137	0.0007231	-0.0597	0.001165	0.06082	5001	2000		pi.1[16606]	0.529	0.2122	0.005186	0.043	0.5571	0.8532	5001	2000
GRMZM2G438239	21	31	81	53		beta.i[34334]	0.001159	0.03227	0.0007379	-0.06041	0.000625	0.0634	5001	2000		pi.1[34334]	0.5616	0.2248	0.005125	0.043	0.6016	0.8859	5001	2000
GRMZM2G085939	46	33	107	118		beta.i[11052]	0.001567	0.03187	0.000677	-0.06056	0.0008887	0.06423	5001	2000		pi.1[11052]	0.5453	0.2111	0.004894	0.04301	0.5762	0.8485	5001	2000
GRMZM5G895359	6	24	56	100		beta.i[35112]	0.001278	0.03209	0.0006927	-0.06101	0.0002577	0.06454	5001	2000		pi.1[35112]	0.6585	0.2426	0.005059	0.04309	0.7127	0.9586	5001	2000
GRMZM2G072839	31	98	49	42		beta.i[10830]	0.001561	0.03057	0.000652	-0.05858	0.001665	0.06124	5001	2000		pi.1[10830]	0.539	0.219	0.004477	0.04319	0.5718	0.8748	5001	2000
GRMZM2G047321	34	35	119	69		beta.i[10450]	0.001324	0.03142	0.0008193	-0.06031	0.001374	0.06446	5001	2000		pi.1[10450]	0.5414	0.2172	0.005031	0.04321	0.5715	0.8652	5001	2000
GRMZM2G030259	30	34	59	110		beta.i[24145]	0.001985	0.03152	0.0007149	-0.06191	0.002649	0.06579	5001	2000		pi.1[24145]	0.5529	0.2138	0.004841	0.04323	0.5798	0.8681	5001	2000
GRMZM2G155437	75	73	115	38		beta.i[12045]	0.001168	0.03173	0.0006654	-0.06002	0.001225	0.06194	5001	2000		pi.1[12045]	0.5118	0.2027	0.004577	0.04325	0.5386	0.8227	5001	2000
GRMZM5G878615	71	21	162	124		beta.i[38994]	0.001663	0.03055	0.0005539	-0.05806	0.001453	0.06103	5001	2000		pi.1[38994]	0.5099	0.2078	0.004658	0.04329	0.5394	0.8212	5001	2000
GRMZM2G039173	6	5	319	155		beta.i[28790]	0.0006368	0.03137	0.0006702	-0.06074	0.001101	0.06136	5001	2000		pi.1[28790]	0.6402	0.2425	0.004529	0.04332	0.6903	0.9507	5001	2000
GRMZM2G046748	59	47	73	145		beta.i[24339]	0.0007215	0.0315	0.0007106	-0.06268	0.0008237	0.06216	5001	2000		pi.1[24339]	0.5276	0.2094	0.004345	0.04333	0.5515	0.8383	5001	2000
GRMZM2G085872	16	43	47	105		beta.i[4992]	0.001339	0.03133	0.0006874	-0.05856	0.0003506	0.06169	5001	2000		pi.1[4992]	0.5909	0.2328	0.004794	0.04334	0.6341	0.9015	5001	2000
GRMZM2G459874	31	22	88	186		beta.i[13462]	0.0003747	0.03131	0.0008237	-0.06369	0.001023	0.06211	5001	2000		pi.1[13462]	0.5578	0.2206	0.005961	0.04335	0.5983	0.8724	5001	2000
GRMZM2G065125	17	40	67	96		beta.i[24571]	1.183e-05	0.03161	0.0006554	-0.06249	0.001233	0.06094	5001	2000		pi.1[24571]	0.5929	0.2277	0.005322	0.04344	0.6401	0.9007	5001	2000
GRMZM2G091331	13	25	90	110		beta.i[945]	0.0005036	0.03176	0.0007695	-0.06151	0.0002	0.06357	5001	2000		pi.1[945]	0.62	0.2266	0.005321	0.04347	0.6653	0.9163	5001	2000
GRMZM2G147112	8	39	43	118		beta.i[40705]	0.0008813	0.03223	0.0007424	-0.06263	0.0005663	0.06317	5001	2000		pi.1[40705]	0.6315	0.2396	0.00579	0.04351	0.6805	0.9388	5001	2000
GRMZM2G370155	15	51	85	51		beta.i[41309]	0.001721	0.03116	0.0006023	-0.05826	0.001662	0.06265	5001	2000		pi.1[41309]	0.5897	0.2282	0.004402	0.04352	0.6309	0.9001	5001	2000
GRMZM2G008356	38	16	137	170		beta.i[32039]	0.0007359	0.03167	0.00073	-0.06165	0.0009813	0.06311	5001	2000		pi.1[32039]	0.5408	0.2229	0.00588	0.04364	0.5808	0.8627	5001	2000
GRMZM2G375116	7	37	48	109		beta.i[26698]	0.001511	0.03121	0.0006591	-0.06391	0.002324	0.06165	5001	2000		pi.1[26698]	0.6414	0.2411	0.005784	0.0437	0.6905	0.9491	5001	2000
GRMZM2G576529	200	261	55	40		beta.i[22877]	0.002034	0.03086	0.0006831	-0.05773	0.002039	0.06321	5001	2000		pi.1[22877]	0.4754	0.1859	0.004332	0.04372	0.4903	0.77	5001	2000
GRMZM2G029385	171	24	100	237		beta.i[3897]	0.0019	0.03196	0.0007198	-0.0605	0.002004	0.06426	5001	2000		pi.1[3897]	0.4669	0.1966	0.004237	0.04373	0.4866	0.7833	5001	2000
GRMZM2G119802	83	23	146	177		beta.i[1172]	0.001309	0.03151	0.0006228	-0.05979	0.002238	0.06162	5001	2000		pi.1[1172]	0.5095	0.2045	0.004573	0.04375	0.5367	0.8179	5001	2000
GRMZM2G011078	10	23	86	107		beta.i[3544]	0.0001971	0.0315	0.0006471	-0.06195	-0.0001486	0.06341	5001	2000		pi.1[3544]	0.622	0.2366	0.005897	0.04376	0.6754	0.9299	5001	2000
GRMZM2G572760	7	18	56	119		beta.i[22867]	0.0004521	0.03136	0.0006499	-0.06027	0.0008147	0.06044	5001	2000		pi.1[22867]	0.6446	0.2461	0.00583	0.04384	0.7042	0.9501	5001	2000
GRMZM2G105167	75	30	119	123		beta.i[40297]	0.002163	0.03195	0.0007574	-0.06062	0.002124	0.06637	5001	2000		pi.1[40297]	0.5135	0.2034	0.004282	0.0439	0.5444	0.8233	5001	2000
GRMZM2G140078	247	47	171	130		beta.i[11816]	0.001462	0.03178	0.0007572	-0.0616	0.002044	0.06318	5001	2000		pi.1[11816]	0.4746	0.1868	0.004079	0.04391	0.5019	0.7644	5001	2000
GRMZM5G853948	94	9	389	424		beta.i[23185]	0.002248	0.03169	0.0008309	-0.05793	0.002281	0.06546	5001	2000		pi.1[23185]	0.5042	0.2017	0.003808	0.04394	0.5268	0.8212	5001	2000
GRMZM2G005659	46	115	50	45		beta.i[9799]	0.001149	0.03127	0.0006475	-0.06142	0.001502	0.06046	5001	2000		pi.1[9799]	0.5334	0.208	0.004335	0.04397	0.5618	0.8433	5001	2000
GRMZM2G143460	267	65	108	142		beta.i[21197]	0.002168	0.03164	0.0007839	-0.0599	0.002193	0.06512	5001	2000		pi.1[21197]	0.4696	0.1887	0.003429	0.04399	0.4901	0.7698	5001	2000
GRMZM2G053117	7	20	57	99		beta.i[4376]	0.0006661	0.03156	0.0007524	-0.06117	0.0008894	0.06272	5001	2000		pi.1[4376]	0.6309	0.2476	0.005353	0.044	0.6856	0.9464	5001	2000
GRMZM2G051915	165	58	92	93		beta.i[28918]	0.001644	0.03186	0.0008432	-0.06165	0.001471	0.06362	5001	2000		pi.1[28918]	0.4843	0.1961	0.005278	0.04406	0.5137	0.794	5001	2000
GRMZM2G171435	37	25	88	123		beta.i[26170]	0.001448	0.03124	0.0005722	-0.05719	0.001034	0.0639	5001	2000		pi.1[26170]	0.5307	0.2233	0.004808	0.04413	0.5666	0.8578	5001	2000
GRMZM2G085123	39	70	66	107		beta.i[4983]	0.002171	0.0323	0.0006942	-0.06066	0.001716	0.07031	5001	2000		pi.1[4983]	0.5516	0.2098	0.004559	0.04414	0.58	0.8641	5001	2000
GRMZM2G081668	81	37	118	122		beta.i[32805]	0.0002962	0.03186	0.0006725	-0.05948	-0.0008078	0.06476	5001	2000		pi.1[32805]	0.5178	0.2001	0.004157	0.04414	0.5483	0.8316	5001	2000
GRMZM2G021470	51	93	62	51		beta.i[28616]	0.001891	0.03202	0.0007016	-0.06097	0.00153	0.06405	5001	2000		pi.1[28616]	0.528	0.2094	0.004796	0.04418	0.5618	0.8431	5001	2000
GRMZM2G385880	11	43	57	128		beta.i[26768]	0.0004323	0.03201	0.0008212	-0.06275	0.0005082	0.06525	5001	2000		pi.1[26768]	0.6253	0.2331	0.005315	0.04421	0.679	0.9256	5001	2000
GRMZM5G892373	3	3	167	275		beta.i[42367]	0.0004221	0.03149	0.0006632	-0.0609	0.000555	0.06261	5001	2000		pi.1[42367]	0.7152	0.256	0.00645	0.04426	0.7873	0.9886	5001	2000
GRMZM2G545336	64	39	96	94		beta.i[22795]	0.001402	0.03131	0.0006326	-0.05929	0.001134	0.06463	5001	2000		pi.1[22795]	0.5141	0.2071	0.005816	0.04427	0.5418	0.8314	5001	2000
GRMZM5G852016	2	2	182	300		beta.i[9017]	-0.0001537	0.032	0.0009561	-0.06206	-0.0007333	0.06344	5001	2000		pi.1[9017]	0.7128	0.2695	0.006357	0.04431	0.7916	0.9913	5001	2000
GRMZM2G102711	31	21	177	57		beta.i[25113]	0.001601	0.0313	0.0005934	-0.05758	0.000728	0.062	5001	2000		pi.1[25113]	0.5418	0.2191	0.005735	0.04432	0.5796	0.8621	5001	2000
GRMZM2G323473	35	68	63	116		beta.i[12594]	0.0008542	0.03193	0.0007366	-0.06135	0.001574	0.06311	5001	2000		pi.1[12594]	0.5554	0.2158	0.005148	0.04434	0.5907	0.8691	5001	2000
GRMZM2G025126	63	41	84	115		beta.i[15154]	0.001629	0.03185	0.0007408	-0.06057	0.00185	0.06232	5001	2000		pi.1[15154]	0.5234	0.2087	0.004271	0.04437	0.554	0.8375	5001	2000
GRMZM2G369309	20	18	126	103		beta.i[7345]	0.001878	0.03144	0.0005377	-0.06003	0.001621	0.06335	5001	2000		pi.1[7345]	0.5761	0.2279	0.005258	0.04438	0.6166	0.892	5001	2000
GRMZM2G355450	8	22	57	103		beta.i[7238]	0.0003982	0.03156	0.000613	-0.06306	0.000794	0.06232	5001	2000		pi.1[7238]	0.6256	0.2472	0.006178	0.04441	0.6778	0.939	5001	2000
GRMZM2G179215	181	62	65	104		beta.i[37532]	0.00187	0.03079	0.000739	-0.0573	0.002291	0.06301	5001	2000		pi.1[37532]	0.4775	0.1975	0.004776	0.04441	0.4962	0.7941	5001	2000
GRMZM2G323838	17	18	100	81		beta.i[7006]	0.0009916	0.03146	0.0007539	-0.06041	0.001196	0.06219	5001	2000		pi.1[7006]	0.5689	0.2325	0.004677	0.04449	0.6133	0.8862	5001	2000
GRMZM2G336583	42	39	106	102		beta.i[30455]	0.002728	0.03164	0.0006965	-0.056	0.002162	0.06623	5001	2000		pi.1[30455]	0.5414	0.2115	0.005455	0.04457	0.5775	0.8531	5001	2000
GRMZM2G033394	59	25	119	96		beta.i[35832]	0.001033	0.03125	0.0007393	-0.05992	0.001391	0.06347	5001	2000		pi.1[35832]	0.5138	0.2132	0.004351	0.04459	0.5474	0.8338	5001	2000
GRMZM2G073222	66	180	59	26		beta.i[4747]	0.001355	0.03155	0.0006686	-0.05989	0.001381	0.06493	5001	2000		pi.1[4747]	0.5114	0.2045	0.0046	0.04462	0.5356	0.8273	5001	2000
GRMZM2G172970	23	31	92	106		beta.i[30189]	0.0006487	0.03124	0.0007367	-0.06101	0.0004299	0.06019	5001	2000		pi.1[30189]	0.5785	0.2257	0.005266	0.04463	0.6194	0.882	5001	2000
GRMZM2G179120	32	7	288	306		beta.i[12420]	0.00109	0.0307	0.0006652	-0.05913	0.001031	0.06111	5001	2000		pi.1[12420]	0.5623	0.2118	0.005214	0.04464	0.6012	0.8587	5001	2000
GRMZM2G080054	63	110	61	64		beta.i[10947]	0.0009934	0.03153	0.0007758	-0.06132	0.001198	0.06147	5001	2000		pi.1[10947]	0.526	0.2059	0.005401	0.04473	0.5567	0.8363	5001	2000
GRMZM5G871336	46	52	42	128		beta.i[18873]	0.00135	0.03237	0.0007752	-0.06392	0.001924	0.06561	5001	2000		pi.1[18873]	0.5242	0.2122	0.004568	0.04477	0.5585	0.8508	5001	2000
GRMZM2G157379	9	22	80	74		beta.i[33531]	-0.0006225	0.03207	0.0006211	-0.06338	1.92e-05	0.06221	5001	2000		pi.1[33531]	0.6208	0.2432	0.005459	0.0448	0.6761	0.9307	5001	2000
GRMZM2G050166	56	54	89	106		beta.i[39766]	0.000793	0.03155	0.0007055	-0.06188	0.001129	0.06184	5001	2000		pi.1[39766]	0.53	0.207	0.004818	0.04483	0.5608	0.8397	5001	2000
GRMZM2G386802	11	24	102	93		beta.i[17694]	0.00181	0.03175	0.0007342	-0.05843	0.001738	0.06454	5001	2000		pi.1[17694]	0.6195	0.2336	0.005963	0.04484	0.6675	0.9249	5001	2000
GRMZM2G168760	87	42	91	103		beta.i[40901]	0.001604	0.03226	0.0007544	-0.06299	0.002428	0.06426	5001	2000		pi.1[40901]	0.5093	0.2043	0.005007	0.04486	0.5361	0.8187	5001	2000
GRMZM5G822237	6	5	156	254		beta.i[14063]	0.0001677	0.03122	0.0006541	-0.05742	1.348e-05	0.05985	5001	2000		pi.1[14063]	0.658	0.2469	0.005539	0.04489	0.7226	0.957	5001	2000
GRMZM2G588410	78	149	45	76		beta.i[13879]	0.0008294	0.03149	0.0006693	-0.06111	0.001489	0.06216	5001	2000		pi.1[13879]	0.5111	0.2017	0.005158	0.04493	0.5372	0.8242	5001	2000
GRMZM2G356545	14	57	62	63		beta.i[22002]	0.00122	0.0307	0.000723	-0.0579	0.001654	0.06249	5001	2000		pi.1[22002]	0.5891	0.2298	0.004933	0.04498	0.6332	0.9047	5001	2000
AC210596.3_FG001	69	25	125	148		beta.i[28349]	0.0006771	0.03163	0.0007635	-0.06073	0.0002121	0.06279	5001	2000		pi.1[28349]	0.5128	0.2062	0.004474	0.04498	0.5413	0.8247	5001	2000
GRMZM2G087291	46	30	93	136		beta.i[5024]	0.001997	0.03158	0.0007334	-0.05934	0.002098	0.06333	5001	2000		pi.1[5024]	0.5402	0.2156	0.004477	0.04503	0.5785	0.8468	5001	2000
GRMZM2G113928	9	10	84	124		beta.i[5558]	0.0005318	0.03214	0.0007347	-0.06165	0.0004029	0.06219	5001	2000		pi.1[5558]	0.6185	0.243	0.005484	0.04504	0.6711	0.9346	5001	2000
GRMZM2G158584	41	30	133	85		beta.i[30042]	0.001036	0.03152	0.0008046	-0.06261	0.0009031	0.06117	5001	2000		pi.1[30042]	0.5412	0.215	0.004858	0.04508	0.5767	0.8603	5001	2000
GRMZM2G026371	45	48	81	143		beta.i[15176]	0.001784	0.03148	0.0006846	-0.06271	0.001876	0.06267	5001	2000		pi.1[15176]	0.5428	0.2097	0.004864	0.04511	0.5731	0.8553	5001	2000
GRMZM2G108493	11	8	186	174		beta.i[5436]	0.00169	0.03156	0.0006475	-0.05884	0.001753	0.06328	5001	2000		pi.1[5436]	0.6112	0.237	0.004846	0.04513	0.659	0.9213	5001	2000
GRMZM5G890241	24	44	74	152		beta.i[9311]	0.0006187	0.03127	0.0007678	-0.0602	0.0004898	0.06351	5001	2000		pi.1[9311]	0.5725	0.2163	0.005045	0.04518	0.6056	0.8814	5001	2000
GRMZM2G115701	11	47	51	145		beta.i[25328]	0.0007786	0.03064	0.0006414	-0.05914	0.001146	0.05887	5001	2000		pi.1[25328]	0.6241	0.232	0.006205	0.0452	0.6695	0.9296	5001	2000
GRMZM5G852605	61	5	522	514		beta.i[14239]	0.001994	0.03217	0.0007295	-0.06246	0.00134	0.06512	5001	2000		pi.1[14239]	0.5172	0.2101	0.005355	0.04528	0.5533	0.8374	5001	2000
GRMZM2G361633	19	5	218	274		beta.i[30555]	0.0004861	0.03165	0.0007382	-0.06255	-4.184e-05	0.06502	5001	2000		pi.1[30555]	0.5672	0.2286	0.00455	0.0453	0.6069	0.8855	5001	2000
GRMZM5G828531	4	3	123	298		beta.i[2664]	0.00169	0.03142	0.0007911	-0.05764	0.001062	0.06583	5001	2000		pi.1[2664]	0.6871	0.254	0.004685	0.04531	0.7513	0.9832	5001	2000
GRMZM5G884437	34	17	264	148		beta.i[9271]	0.0008785	0.03149	0.0007357	-0.06042	0.001958	0.05929	5001	2000		pi.1[9271]	0.5622	0.2133	0.004817	0.04532	0.6004	0.8651	5001	2000
GRMZM2G089244	23	17	188	103		beta.i[20441]	0.0008639	0.03211	0.0007852	-0.06438	0.0008665	0.06363	5001	2000		pi.1[20441]	0.5641	0.22	0.005149	0.04534	0.5969	0.8799	5001	2000
GRMZM2G036564	3	6	113	196		beta.i[28763]	0.001026	0.03154	0.0007906	-0.05948	0.0005104	0.06383	5001	2000		pi.1[28763]	0.716	0.2519	0.004302	0.04535	0.7921	0.9875	5001	2000
GRMZM2G055917	18	26	60	114		beta.i[32545]	0.001775	0.03137	0.0006734	-0.05821	0.001947	0.06252	5001	2000		pi.1[32545]	0.5795	0.2286	0.005399	0.04536	0.6259	0.893	5001	2000
GRMZM2G079365	32	44	80	108		beta.i[20315]	0.0004329	0.03055	0.0007224	-0.05962	0.0006191	0.06074	5001	2000		pi.1[20315]	0.5588	0.2157	0.004668	0.04538	0.5957	0.8696	5001	2000
GRMZM2G068913	11	15	96	144		beta.i[15769]	0.0005369	0.03223	0.0006583	-0.06316	0.00109	0.06394	5001	2000		pi.1[15769]	0.6229	0.2365	0.005798	0.0454	0.6734	0.9277	5001	2000
GRMZM2G174958	97	159	56	75		beta.i[21621]	0.0004381	0.03177	0.0007427	-0.06477	0.001813	0.06223	5001	2000		pi.1[21621]	0.509	0.1989	0.003967	0.0454	0.5411	0.8227	5001	2000
GRMZM2G424155	38	45	91	108		beta.i[26992]	0.002425	0.03092	0.0006493	-0.05934	0.001566	0.06327	5001	2000		pi.1[26992]	0.5522	0.2121	0.004902	0.04547	0.5882	0.8546	5001	2000
GRMZM2G161641	302	26	294	218		beta.i[26025]	0.002615	0.03167	0.0007249	-0.05877	0.002239	0.06238	5001	2000		pi.1[26025]	0.4604	0.1845	0.004521	0.04548	0.4764	0.7698	5001	2000
GRMZM2G149480	22	15	124	135		beta.i[6218]	0.001949	0.03168	0.0006527	-0.06179	0.001243	0.06436	5001	2000		pi.1[6218]	0.571	0.2249	0.005179	0.04553	0.6124	0.8845	5001	2000
GRMZM2G173967	32	31	82	188		beta.i[33687]	0.001393	0.03146	0.0006831	-0.05928	0.001091	0.06357	5001	2000		pi.1[33687]	0.5622	0.2186	0.005131	0.04555	0.5947	0.8748	5001	2000
GRMZM2G015889	41	39	48	213		beta.i[9953]	0.001394	0.0327	0.0006988	-0.06183	0.00131	0.06558	5001	2000		pi.1[9953]	0.5426	0.2168	0.004789	0.04558	0.5826	0.8545	5001	2000
GRMZM2G396846	32	47	76	70		beta.i[2063]	0.001318	0.03173	0.0006905	-0.06099	0.0007528	0.06445	5001	2000		pi.1[2063]	0.5548	0.213	0.004672	0.04561	0.5846	0.8707	5001	2000
GRMZM2G412869	92	62	77	136		beta.i[26921]	0.000283	0.03204	0.0006673	-0.06304	0.001139	0.06057	5001	2000		pi.1[26921]	0.5187	0.2085	0.005107	0.04568	0.5502	0.8266	5001	2000
GRMZM2G342452	22	64	41	89		beta.i[7129]	0.002639	0.03141	0.000653	-0.05578	0.001455	0.06653	5001	2000		pi.1[7129]	0.5705	0.2258	0.004775	0.0457	0.6108	0.8867	5001	2000
GRMZM2G138814	23	42	62	121		beta.i[6030]	0.001804	0.03102	0.0007707	-0.05947	0.001648	0.06042	5001	2000		pi.1[6030]	0.5695	0.2234	0.005884	0.04573	0.612	0.8807	5001	2000
GRMZM2G368151	15	10	91	216		beta.i[17582]	0.001193	0.03171	0.0007887	-0.06015	0.001191	0.06532	5001	2000		pi.1[17582]	0.5912	0.2371	0.005437	0.04573	0.6422	0.9078	5001	2000
GRMZM2G431314	10	8	134	126		beta.i[22374]	0.0006809	0.0317	0.0007866	-0.06298	-0.0003532	0.0625	5001	2000		pi.1[22374]	0.6021	0.2405	0.003949	0.04574	0.6548	0.9183	5001	2000
GRMZM2G446234	41	13	213	222		beta.i[41597]	0.0009102	0.03195	0.0007042	-0.05968	-0.0004805	0.0638	5001	2000		pi.1[41597]	0.5411	0.2107	0.004435	0.04574	0.5717	0.849	5001	2000
GRMZM5G866627	20	36	108	77		beta.i[23245]	0.001594	0.03102	0.0006839	-0.06182	0.001715	0.06185	5001	2000		pi.1[23245]	0.5807	0.2234	0.00502	0.04575	0.6268	0.892	5001	2000
GRMZM5G853638	47	152	51	81		beta.i[34952]	0.0008299	0.03188	0.000691	-0.06262	0.001207	0.06372	5001	2000		pi.1[34952]	0.5386	0.2064	0.004466	0.04577	0.571	0.847	5001	2000
GRMZM2G036286	21	23	121	121		beta.i[24213]	-0.0005509	0.03129	0.0006938	-0.06248	-0.0005514	0.05878	5001	2000		pi.1[24213]	0.5838	0.2254	0.005614	0.04578	0.6284	0.896	5001	2000
GRMZM2G047763	7	20	52	120		beta.i[19896]	-5.656e-05	0.03098	0.0007373	-0.06136	0.0002124	0.06164	5001	2000		pi.1[19896]	0.6355	0.2461	0.006349	0.04589	0.684	0.9464	5001	2000
GRMZM2G044180	14	16	124	138		beta.i[39711]	0.000559	0.0313	0.0006955	-0.05912	0.00021	0.06113	5001	2000		pi.1[39711]	0.6123	0.2237	0.004333	0.04589	0.6618	0.9083	5001	2000
GRMZM2G473906	30	63	66	102		beta.i[8138]	0.002419	0.03254	0.0007002	-0.06179	0.002512	0.06494	5001	2000		pi.1[8138]	0.5561	0.221	0.004588	0.04595	0.5958	0.8731	5001	2000
GRMZM2G075712	95	40	144	131		beta.i[4798]	0.001611	0.03133	0.0007108	-0.06007	0.001865	0.06302	5001	2000		pi.1[4798]	0.5202	0.1996	0.004881	0.04599	0.5501	0.8233	5001	2000
GRMZM2G432525	6	9	104	125		beta.i[13276]	0.0004588	0.03212	0.0006463	-0.06136	-0.0006886	0.06434	5001	2000		pi.1[13276]	0.6439	0.2502	0.005842	0.04603	0.7023	0.9544	5001	2000
AC210013.4_FG009	93	46	98	104		beta.i[23602]	0.001169	0.03133	0.0006661	-0.05788	0.001759	0.06216	5001	2000		pi.1[23602]	0.503	0.2048	0.005014	0.04609	0.5305	0.8156	5001	2000
GRMZM2G173040	119	57	109	149		beta.i[1627]	0.001426	0.03182	0.0005435	-0.05974	0.00209	0.06226	5001	2000		pi.1[1627]	0.5083	0.1944	0.004762	0.0461	0.5376	0.8063	5001	2000
GRMZM2G074611	9	35	75	96		beta.i[40001]	0.0004495	0.03213	0.0008109	-0.06271	0.001296	0.06167	5001	2000		pi.1[40001]	0.6327	0.2358	0.005092	0.0461	0.6865	0.9372	5001	2000
GRMZM5G858839	4	23	31	221		beta.i[31582]	0.0001533	0.03124	0.0006873	-0.06158	0.0005798	0.06087	5001	2000		pi.1[31582]	0.68	0.2558	0.007168	0.04624	0.7499	0.9757	5001	2000
GRMZM2G107528	163	145	54	66		beta.i[25186]	0.001051	0.03084	0.0006358	-0.05715	0.001488	0.063	5001	2000		pi.1[25186]	0.482	0.1923	0.00548	0.04625	0.5107	0.7864	5001	2000
GRMZM2G100687	33	68	45	71		beta.i[36627]	0.001222	0.03188	0.000721	-0.06167	0.0007931	0.06436	5001	2000		pi.1[36627]	0.5425	0.2175	0.003743	0.04629	0.5753	0.8676	5001	2000
GRMZM2G417258	53	66	123	48		beta.i[41506]	0.002336	0.03133	0.0006873	-0.05664	0.001432	0.06405	5001	2000		pi.1[41506]	0.5283	0.2088	0.005032	0.04631	0.5584	0.847	5001	2000
GRMZM2G471805	2113	180	136	167		beta.i[22569]	0.0003848	0.03222	0.001242	-0.06194	0.0001764	0.06301	5001	2000		pi.1[22569]	0.419	0.1622	0.003786	0.04635	0.4344	0.6956	5001	2000
GRMZM2G408703	77	39	73	161		beta.i[41473]	0.001582	0.03183	0.0007216	-0.0596	0.001981	0.06424	5001	2000		pi.1[41473]	0.5122	0.2117	0.005211	0.04636	0.5439	0.8329	5001	2000
GRMZM2G085117	5	33	40	126		beta.i[24859]	0.00153	0.03085	0.0007571	-0.05892	0.001924	0.06199	5001	2000		pi.1[24859]	0.6676	0.2452	0.005626	0.04638	0.7285	0.9659	5001	2000
GRMZM2G153766	34	60	76	46		beta.i[37235]	0.0009357	0.03174	0.0006895	-0.06294	0.001783	0.06377	5001	2000		pi.1[37235]	0.5414	0.2174	0.00433	0.04638	0.5748	0.8579	5001	2000
GRMZM2G134545	245	43	108	145		beta.i[33310]	0.002241	0.03172	0.0006083	-0.05784	0.001676	0.06283	5001	2000		pi.1[33310]	0.4611	0.1868	0.003279	0.04641	0.4836	0.7649	5001	2000
GRMZM5G866758	50	27	163	145		beta.i[9126]	0.0009365	0.03127	0.0007347	-0.05995	0.0009927	0.0616	5001	2000		pi.1[9126]	0.5441	0.212	0.004975	0.04642	0.5797	0.8462	5001	2000
GRMZM2G455582	20	24	147	81		beta.i[30950]	0.002073	0.0319	0.0006946	-0.06163	0.003078	0.06662	5001	2000		pi.1[30950]	0.5759	0.2248	0.005191	0.04642	0.6148	0.8887	5001	2000
GRMZM2G402564	80	213	84	31		beta.i[7564]	0.0004355	0.03076	0.0006961	-0.05829	0.0005341	0.06262	5001	2000		pi.1[7564]	0.515	0.2001	0.004747	0.04644	0.5473	0.8143	5001	2000
GRMZM2G004898	68	97	93	40		beta.i[19338]	0.0008633	0.03173	0.0006456	-0.05964	0.001209	0.06012	5001	2000		pi.1[19338]	0.5146	0.207	0.00468	0.04654	0.5438	0.8271	5001	2000
GRMZM2G359368	40	69	51	81		beta.i[17534]	0.001317	0.03233	0.0007136	-0.0596	0.00133	0.06408	5001	2000		pi.1[17534]	0.5408	0.2152	0.004619	0.04655	0.5788	0.8527	5001	2000
GRMZM2G012681	44	147	55	50		beta.i[28534]	0.001537	0.0318	0.000741	-0.06272	0.002776	0.06301	5001	2000		pi.1[28534]	0.5345	0.2108	0.004729	0.04655	0.5668	0.8453	5001	2000
GRMZM2G167924	10	14	118	108		beta.i[33632]	0.0004079	0.03235	0.0007237	-0.0624	0.0006418	0.06366	5001	2000		pi.1[33632]	0.6177	0.2339	0.005657	0.04657	0.6656	0.9304	5001	2000
GRMZM2G368491	260	42	216	146		beta.i[17589]	0.001823	0.0321	0.0008369	-0.06265	0.002624	0.06297	5001	2000		pi.1[17589]	0.4724	0.1893	0.004339	0.04662	0.4982	0.7753	5001	2000
GRMZM2G020631	4	16	150	36		beta.i[3736]	0.0006885	0.03137	0.000574	-0.05912	0.001168	0.06255	5001	2000		pi.1[3736]	0.6494	0.2621	0.006031	0.04663	0.7081	0.973	5001	2000
GRMZM2G077320	15	34	75	110		beta.i[4830]	0.0006856	0.03167	0.0006295	-0.06	0.000743	0.06241	5001	2000		pi.1[4830]	0.5895	0.2322	0.005727	0.04663	0.6297	0.9065	5001	2000
GRMZM5G888697	135	152	46	66		beta.i[14474]	0.001738	0.03215	0.000827	-0.0612	0.00199	0.06337	5001	2000		pi.1[14474]	0.4874	0.1954	0.004513	0.04663	0.5096	0.799	5001	2000
GRMZM2G089854	51	29	123	126		beta.i[32887]	0.0006558	0.03045	0.0005932	-0.06074	-6.967e-05	0.06287	5001	2000		pi.1[32887]	0.5354	0.2102	0.004561	0.04667	0.57	0.8487	5001	2000
AC234160.1_FG001	3	3	206	240		beta.i[35417]	0.001828	0.03193	0.0009169	-0.06119	0.001983	0.06431	5001	2000		pi.1[35417]	0.7024	0.2535	0.00608	0.04667	0.7733	0.9873	5001	2000
GRMZM2G072814	58	128	63	44		beta.i[4741]	0.001009	0.031	0.0007414	-0.05571	0.001132	0.06424	5001	2000		pi.1[4741]	0.5196	0.2037	0.004826	0.04678	0.5511	0.8335	5001	2000
GRMZM2G014793	24	21	91	165		beta.i[23910]	0.00136	0.03106	0.0006091	-0.05802	0.001806	0.06222	5001	2000		pi.1[23910]	0.5729	0.2243	0.00499	0.04679	0.6122	0.8796	5001	2000
GRMZM2G018619	37	40	57	93		beta.i[39481]	0.001305	0.03269	0.0006472	-0.06279	0.0006696	0.06408	5001	2000		pi.1[39481]	0.5444	0.215	0.004852	0.04682	0.5864	0.8538	5001	2000
GRMZM2G099995	35	30	72	101		beta.i[25075]	0.001384	0.03078	0.0007508	-0.05598	0.001215	0.06226	5001	2000		pi.1[25075]	0.5423	0.2205	0.00543	0.04691	0.5745	0.8651	5001	2000
GRMZM2G333579	7	7	165	163		beta.i[30439]	0.0008248	0.03158	0.0007375	-0.05895	0.0007718	0.06244	5001	2000		pi.1[30439]	0.6501	0.2418	0.005944	0.04691	0.7099	0.9514	5001	2000
GRMZM2G005630	142	37	147	165		beta.i[3427]	0.0006482	0.03105	0.0007993	-0.06066	0.0009715	0.06179	5001	2000		pi.1[3427]	0.4913	0.1981	0.003949	0.04694	0.5177	0.792	5001	2000
GRMZM5G800586	3	11	36	309		beta.i[18489]	-0.0008105	0.0316	0.000754	-0.06057	-0.0007546	0.05907	5001	2000		pi.1[18489]	0.7081	0.2593	0.006355	0.04694	0.7869	0.9901	5001	2000
GRMZM2G148508	74	141	62	35		beta.i[1436]	0.001077	0.03079	0.0006352	-0.06254	0.001247	0.06105	5001	2000		pi.1[1436]	0.5015	0.2067	0.006069	0.04695	0.5303	0.8243	5001	2000
GRMZM2G151905	74	44	100	128		beta.i[11991]	0.00269	0.03193	0.0005701	-0.06186	0.002684	0.06425	5001	2000		pi.1[11991]	0.5241	0.1996	0.003892	0.04698	0.5532	0.8231	5001	2000
GRMZM2G001803	34	31	72	96		beta.i[3353]	0.001776	0.03098	0.0006192	-0.06014	0.001158	0.06226	5001	2000		pi.1[3353]	0.5445	0.2172	0.004335	0.04701	0.5858	0.8596	5001	2000
GRMZM5G879882	28	19	138	89		beta.i[18917]	0.001511	0.03175	0.0005997	-0.06012	0.001512	0.06648	5001	2000		pi.1[18917]	0.5575	0.2186	0.004026	0.04707	0.5978	0.8749	5001	2000
GRMZM2G131329	35	53	66	91		beta.i[21033]	0.001784	0.03101	0.0005889	-0.06013	0.002163	0.06142	5001	2000		pi.1[21033]	0.5497	0.2169	0.005477	0.04707	0.5898	0.862	5001	2000
GRMZM2G157812	73	20	155	176		beta.i[1532]	0.00171	0.03156	0.0006507	-0.06086	0.001999	0.06387	5001	2000		pi.1[1532]	0.5149	0.2072	0.004174	0.04713	0.5481	0.818	5001	2000
GRMZM2G139617	15	42	84	76		beta.i[16668]	0.0011	0.03164	0.000668	-0.06265	0.00101	0.06388	5001	2000		pi.1[16668]	0.5957	0.2251	0.004654	0.04713	0.6404	0.9056	5001	2000
GRMZM2G171383	21	26	73	79		beta.i[1618]	0.001043	0.03066	0.0007127	-0.05973	0.001031	0.0626	5001	2000		pi.1[1618]	0.5663	0.2261	0.005306	0.0472	0.6072	0.8909	5001	2000
GRMZM2G000481	25	28	134	77		beta.i[19273]	0.002685	0.03063	0.0006094	-0.05796	0.002921	0.05968	5001	2000		pi.1[19273]	0.5692	0.2186	0.004377	0.0472	0.6095	0.8789	5001	2000
GRMZM2G041344	103	38	138	99		beta.i[19807]	0.001896	0.0307	0.0008058	-0.05818	0.001192	0.06236	5001	2000		pi.1[19807]	0.4991	0.2022	0.005265	0.04722	0.5315	0.8108	5001	2000
GRMZM2G029974	42	67	71	100		beta.i[35789]	0.001087	0.03188	0.0007423	-0.06155	0.001792	0.06328	5001	2000		pi.1[35789]	0.5488	0.2168	0.004834	0.04724	0.5863	0.8629	5001	2000
GRMZM2G084164	77	33	113	142		beta.i[24846]	0.002627	0.03233	0.0005724	-0.06249	0.002583	0.0649	5001	2000		pi.1[24846]	0.5196	0.2026	0.004216	0.04728	0.5476	0.827	5001	2000
GRMZM2G094428	7	10	74	335		beta.i[16144]	-4.015e-06	0.03166	0.0007003	-0.06071	-0.0002695	0.06227	5001	2000		pi.1[16144]	0.6581	0.2465	0.005489	0.04745	0.7218	0.9541	5001	2000
GRMZM2G314955	17	31	71	126		beta.i[12543]	0.002645	0.03131	0.0006293	-0.06006	0.002795	0.06471	5001	2000		pi.1[12543]	0.5849	0.2261	0.004751	0.04751	0.6312	0.896	5001	2000
GRMZM2G434809	56	62	114	60		beta.i[34323]	0.001766	0.03251	0.0008045	-0.06079	0.001397	0.06906	5001	2000		pi.1[34323]	0.5273	0.2097	0.004561	0.04752	0.5572	0.8467	5001	2000
GRMZM2G308982	12	20	93	150		beta.i[33794]	0.001333	0.03175	0.0007857	-0.06137	0.002167	0.06256	5001	2000		pi.1[33794]	0.6188	0.2295	0.005457	0.04753	0.6744	0.917	5001	2000
GRMZM2G038003	20	82	51	103		beta.i[15346]	0.001821	0.03265	0.0007658	-0.06131	0.001736	0.06867	5001	2000		pi.1[15346]	0.5809	0.2222	0.004831	0.04759	0.625	0.8892	5001	2000
GRMZM2G082931	18	28	105	101		beta.i[11002]	0.002271	0.03216	0.0007255	-0.05892	0.001493	0.06571	5001	2000		pi.1[11002]	0.5882	0.225	0.006491	0.04764	0.6333	0.9022	5001	2000
GRMZM2G054715	36	49	72	141		beta.i[15564]	0.001552	0.03146	0.0007152	-0.06063	0.001502	0.06161	5001	2000		pi.1[15564]	0.5524	0.2131	0.004857	0.04764	0.5855	0.8661	5001	2000
AC210595.3_FG004	2	5	95	181		beta.i[39228]	0.0007696	0.03135	0.0005691	-0.05868	0.0007197	0.06317	5001	2000		pi.1[39228]	0.7166	0.2615	0.005572	0.04766	0.7923	0.9917	5001	2000
GRMZM2G125931	169	31	172	126		beta.i[1237]	0.001876	0.03151	0.0007386	-0.06099	0.002164	0.06228	5001	2000		pi.1[1237]	0.4829	0.1951	0.004016	0.04767	0.5057	0.7803	5001	2000
GRMZM2G134878	15	30	96	84		beta.i[29766]	0.0008171	0.03197	0.0006524	-0.06243	0.0008812	0.06518	5001	2000		pi.1[29766]	0.5936	0.232	0.004563	0.04769	0.6434	0.9069	5001	2000
GRMZM2G013349	67	38	136	129		beta.i[39432]	0.001774	0.03149	0.0007071	-0.06148	0.001436	0.06396	5001	2000		pi.1[39432]	0.528	0.2046	0.00419	0.04776	0.5569	0.8337	5001	2000
GRMZM2G165597	16	24	83	203		beta.i[12201]	0.0009904	0.03228	0.0007125	-0.06075	0.001353	0.06242	5001	2000		pi.1[12201]	0.6076	0.2228	0.005196	0.04782	0.6512	0.906	5001	2000
GRMZM2G164475	153	60	68	167		beta.i[16982]	0.002339	0.03223	0.0006947	-0.06129	0.002154	0.0637	5001	2000		pi.1[16982]	0.4813	0.1957	0.004577	0.04784	0.5075	0.793	5001	2000
GRMZM2G335720	41	40	83	155		beta.i[37715]	0.001145	0.03238	0.0007855	-0.06209	0.001264	0.06468	5001	2000		pi.1[37715]	0.5517	0.2127	0.004954	0.04786	0.5848	0.8596	5001	2000
GRMZM2G365774	283	77	62	181		beta.i[37839]	0.002006	0.03142	0.0008088	-0.06014	0.002311	0.06263	5001	2000		pi.1[37839]	0.4558	0.1868	0.00473	0.04788	0.4745	0.7712	5001	2000
GRMZM2G353095	94	39	92	118		beta.i[17497]	0.0006543	0.03131	0.0008284	-0.05897	0.0003344	0.06275	5001	2000		pi.1[17497]	0.5058	0.2008	0.004058	0.04791	0.5325	0.8139	5001	2000
GRMZM2G064171	38	32	73	93		beta.i[24554]	0.003331	0.03181	0.0007207	-0.05894	0.003454	0.06567	5001	2000		pi.1[24554]	0.5406	0.2131	0.004387	0.04791	0.5784	0.854	5001	2000
GRMZM2G168510	38	64	33	72		beta.i[17032]	0.002147	0.03206	0.0007038	-0.0596	0.002582	0.0661	5001	2000		pi.1[17032]	0.5271	0.2179	0.005514	0.04792	0.5639	0.8468	5001	2000
GRMZM2G051256	7	15	112	109		beta.i[15511]	0.001371	0.03152	0.000641	-0.05964	0.001804	0.06345	5001	2000		pi.1[15511]	0.6451	0.2393	0.006563	0.04793	0.7064	0.9472	5001	2000
GRMZM2G301934	10	31	60	97		beta.i[33763]	0.0005286	0.03133	0.0006899	-0.05954	-0.0007071	0.06497	5001	2000		pi.1[33763]	0.6257	0.2369	0.005982	0.04799	0.6816	0.9306	5001	2000
GRMZM2G167982	36	23	114	155		beta.i[12229]	0.0009842	0.032	0.0006425	-0.06285	0.00108	0.06351	5001	2000		pi.1[12229]	0.5526	0.2121	0.004051	0.048	0.5859	0.8599	5001	2000
GRMZM2G113967	143	94	59	162		beta.i[20787]	0.001127	0.03174	0.0006448	-0.06202	0.001428	0.06196	5001	2000		pi.1[20787]	0.493	0.1936	0.003919	0.04805	0.5157	0.7991	5001	2000
GRMZM2G034430	59	57	76	133		beta.i[15272]	0.001155	0.03165	0.0006326	-0.05855	0.0007954	0.06272	5001	2000		pi.1[15272]	0.5361	0.2074	0.004825	0.04807	0.5665	0.8389	5001	2000
GRMZM2G054152	12	30	68	154		beta.i[4393]	0.0008702	0.03137	0.000764	-0.0599	0.00124	0.0619	5001	2000		pi.1[4393]	0.6212	0.2321	0.005692	0.04811	0.679	0.9203	5001	2000
GRMZM2G114052	57	40	102	131		beta.i[20789]	0.0002484	0.03097	0.0007843	-0.06239	0.0001645	0.06135	5001	2000		pi.1[20789]	0.5414	0.2047	0.004794	0.04817	0.5738	0.8487	5001	2000
GRMZM2G035726	3	2	154	325		beta.i[15309]	0.0006778	0.03123	0.0006639	-0.0617	0.0006938	0.0622	5001	2000		pi.1[15309]	0.7008	0.2611	0.005333	0.04824	0.7742	0.9866	5001	2000
GRMZM5G871963	23	13	136	163		beta.i[18880]	0.002199	0.03124	0.0006838	-0.05818	0.002005	0.06558	5001	2000		pi.1[18880]	0.5639	0.2249	0.004688	0.04826	0.6018	0.8833	5001	2000
GRMZM2G128914	92	52	90	125		beta.i[1270]	0.0006784	0.03202	0.0008905	-0.0629	1.506e-05	0.06375	5001	2000		pi.1[1270]	0.512	0.2002	0.004441	0.04827	0.5374	0.8162	5001	2000
GRMZM2G178289	45	45	105	60		beta.i[41000]	0.0006171	0.03248	0.0006767	-0.06147	0.001262	0.06705	5001	2000		pi.1[41000]	0.5324	0.2104	0.004061	0.04827	0.562	0.8483	5001	2000
GRMZM2G118806	91	35	86	150		beta.i[36831]	0.001778	0.03143	0.0006363	-0.06276	0.001708	0.06328	5001	2000		pi.1[36831]	0.5043	0.2046	0.004321	0.04828	0.5285	0.8149	5001	2000
GRMZM2G062576	3	10	113	135		beta.i[15691]	0.0005541	0.03057	0.0006976	-0.06004	0.0004704	0.05925	5001	2000		pi.1[15691]	0.7213	0.2473	0.006195	0.04833	0.7915	0.9883	5001	2000
GRMZM2G382035	78	260	100	19		beta.i[37920]	0.002057	0.03075	0.0006754	-0.05803	0.002244	0.06144	5001	2000		pi.1[37920]	0.5171	0.2001	0.00451	0.0484	0.5443	0.824	5001	2000
GRMZM2G356074	222	40	164	219		beta.i[33978]	0.002535	0.03094	0.0006618	-0.05965	0.002514	0.06432	5001	2000		pi.1[33978]	0.485	0.1864	0.004288	0.04842	0.5091	0.7737	5001	2000
GRMZM5G834697	45	34	89	138		beta.i[42103]	0.0008782	0.03263	0.0007725	-0.06271	0.001341	0.06462	5001	2000		pi.1[42103]	0.5451	0.2149	0.0058	0.04847	0.5816	0.8502	5001	2000
GRMZM5G863796	67	143	65	36		beta.i[9105]	0.001376	0.03107	0.0007467	-0.06031	0.001773	0.06142	5001	2000		pi.1[9105]	0.515	0.202	0.005972	0.04851	0.5404	0.8283	5001	2000
GRMZM2G037350	8	5	311	249		beta.i[35896]	0.0005907	0.03138	0.0008615	-0.06045	0.0005338	0.06088	5001	2000		pi.1[35896]	0.6392	0.2365	0.005248	0.04852	0.6929	0.9364	5001	2000
GRMZM2G015502	35	42	111	84		beta.i[39451]	0.002495	0.03101	0.0006483	-0.05927	0.002795	0.06508	5001	2000		pi.1[39451]	0.5499	0.2148	0.004669	0.04852	0.5814	0.8639	5001	2000
GRMZM2G469920	187	36	199	162		beta.i[27250]	0.001202	0.03234	0.0006665	-0.06414	0.0009551	0.06583	5001	2000		pi.1[27250]	0.4871	0.1899	0.004152	0.04853	0.5117	0.7863	5001	2000
GRMZM2G147332	6	12	83	111		beta.i[6177]	0.0002841	0.03109	0.0007424	-0.06137	-0.0001758	0.06176	5001	2000		pi.1[6177]	0.6554	0.2443	0.006216	0.04855	0.71	0.955	5001	2000
GRMZM2G136311	41	35	113	115		beta.i[29784]	0.0008426	0.03149	0.0007624	-0.0619	0.001136	0.06234	5001	2000		pi.1[29784]	0.546	0.2126	0.005834	0.04857	0.5829	0.8632	5001	2000
GRMZM2G108384	60	50	94	107		beta.i[40328]	0.001226	0.03189	0.0007223	-0.06042	0.0009342	0.06429	5001	2000		pi.1[40328]	0.5275	0.2073	0.00439	0.04858	0.5593	0.8345	5001	2000
AC231747.1_FG001	17	18	108	156		beta.i[165]	0.002675	0.0318	0.0006894	-0.05763	0.00218	0.06502	5001	2000		pi.1[165]	0.5948	0.2255	0.00563	0.0486	0.639	0.9078	5001	2000
GRMZM2G306028	44	24	111	177		beta.i[30314]	0.0006309	0.03108	0.000693	-0.06152	0.001116	0.06108	5001	2000		pi.1[30314]	0.5427	0.2176	0.004748	0.04861	0.5819	0.8567	5001	2000
GRMZM2G008106	5	16	62	165		beta.i[19385]	0.0003196	0.03156	0.0006612	-0.06318	-0.0004382	0.06196	5001	2000		pi.1[19385]	0.6806	0.2423	0.005706	0.04869	0.7431	0.9692	5001	2000
GRMZM2G112942	9	4	431	315		beta.i[5529]	0.001291	0.03167	0.0008999	-0.0621	0.001196	0.06316	5001	2000		pi.1[5529]	0.6246	0.24	0.004852	0.0487	0.6716	0.9361	5001	2000
GRMZM2G039961	6	41	45	97		beta.i[10312]	0.001892	0.03236	0.0006434	-0.0624	0.002949	0.06646	5001	2000		pi.1[10312]	0.6587	0.244	0.006267	0.04871	0.7179	0.955	5001	2000
GRMZM2G173424	37	60	79	104		beta.i[17085]	0.0002016	0.03181	0.0006445	-0.05971	0.001106	0.06048	5001	2000		pi.1[17085]	0.5568	0.2094	0.004283	0.04872	0.5905	0.8618	5001	2000
ltk2	32	17	83	303		beta.i[41161]	0.002169	0.03041	0.000816	-0.05654	0.002572	0.0619	5001	2000		pi.1[41161]	0.5635	0.2145	0.004695	0.04876	0.5979	0.8637	5001	2000
GRMZM2G127031	22	26	143	160		beta.i[33238]	0.0008996	0.03159	0.000773	-0.05991	0.0003696	0.0654	5001	2000		pi.1[33238]	0.5896	0.2199	0.004888	0.04878	0.6308	0.8965	5001	2000
GRMZM2G157586	140	112	48	59		beta.i[12072]	0.0005467	0.03201	0.0008345	-0.06228	0.0003689	0.06501	5001	2000		pi.1[12072]	0.477	0.1942	0.00409	0.04881	0.4954	0.7855	5001	2000
GRMZM2G054393	56	56	79	112		beta.i[661]	0.001861	0.031	0.0007624	-0.05733	0.002365	0.06189	5001	2000		pi.1[661]	0.5367	0.2069	0.004526	0.04884	0.5676	0.8505	5001	2000
GRMZM2G030713	8	8	111	325		beta.i[10171]	-0.0007261	0.03208	0.0006565	-0.06454	4.237e-05	0.06187	5001	2000		pi.1[10171]	0.6545	0.2344	0.00421	0.04885	0.7087	0.9447	5001	2000
GRMZM2G095611	60	46	64	149		beta.i[36551]	0.001208	0.03238	0.0007373	-0.06134	0.001747	0.06448	5001	2000		pi.1[36551]	0.5234	0.2091	0.004933	0.04886	0.5487	0.8369	5001	2000
GRMZM2G102347	46	101	35	168		beta.i[5313]	0.00236	0.03203	0.0006854	-0.05989	0.002167	0.06234	5001	2000		pi.1[5313]	0.544	0.2102	0.005291	0.04891	0.5747	0.8499	5001	2000
GRMZM2G456768	253	25	227	322		beta.i[7997]	0.001263	0.03126	0.0007109	-0.05773	0.0005969	0.06523	5001	2000		pi.1[7997]	0.4725	0.188	0.004311	0.04895	0.4916	0.7735	5001	2000
GRMZM2G419938	523	99	125	61		beta.i[7697]	0.002714	0.03198	0.0009335	-0.06063	0.003047	0.06577	5001	2000		pi.1[7697]	0.4414	0.1765	0.003711	0.04897	0.4624	0.7356	5001	2000
GRMZM2G146778	5	5	204	203		beta.i[29911]	0.0004659	0.03202	0.0007306	-0.06144	1.005e-05	0.06414	5001	2000		pi.1[29911]	0.6717	0.2437	0.005368	0.04897	0.731	0.9688	5001	2000
GRMZM2G098420	56	55	70	106		beta.i[25053]	0.0008346	0.0318	0.0006023	-0.06093	0.0005195	0.06245	5001	2000		pi.1[25053]	0.5318	0.208	0.004648	0.04898	0.5651	0.838	5001	2000
GRMZM2G105391	40	22	112	135		beta.i[25149]	0.0004609	0.0312	0.0006265	-0.05798	0.000468	0.0635	5001	2000		pi.1[25149]	0.5394	0.2129	0.004582	0.04898	0.5666	0.8575	5001	2000
GRMZM2G060011	20	67	37	137		beta.i[10650]	0.001045	0.03226	0.0006451	-0.06038	0.0008072	0.06352	5001	2000		pi.1[10650]	0.5818	0.2231	0.005024	0.04901	0.6199	0.8923	5001	2000
GRMZM2G420733	11	21	82	315		beta.i[34244]	0.001716	0.03141	0.0006439	-0.05907	0.001481	0.06683	5001	2000		pi.1[34244]	0.6325	0.2319	0.004868	0.04902	0.6798	0.9283	5001	2000
GRMZM2G072388	22	56	59	91		beta.i[10823]	0.000806	0.03138	0.0007202	-0.05963	0.0005508	0.06346	5001	2000		pi.1[10823]	0.5699	0.2256	0.004822	0.04904	0.6108	0.8859	5001	2000
GRMZM2G033671	73	53	115	62		beta.i[15266]	0.0006556	0.03137	0.0008192	-0.06048	0.0003894	0.06189	5001	2000		pi.1[15266]	0.5171	0.2031	0.004131	0.04907	0.5427	0.8295	5001	2000
GRMZM2G133028	35	64	58	118		beta.i[16580]	0.001641	0.03114	0.0006748	-0.05681	0.0007642	0.06484	5001	2000		pi.1[16580]	0.556	0.2165	0.004254	0.04908	0.5934	0.8632	5001	2000
GRMZM2G701310	180	145	69	55		beta.i[27585]	0.0001649	0.03132	0.0006629	-0.06027	0.0003822	0.0599	5001	2000		pi.1[27585]	0.4823	0.1904	0.003968	0.04913	0.5041	0.7794	5001	2000
GRMZM2G426964	37	60	59	96		beta.i[41527]	0.0008315	0.03216	0.0006877	-0.06684	0.001745	0.06397	5001	2000		pi.1[41527]	0.5505	0.2129	0.005011	0.04921	0.5958	0.8518	5001	2000
GRMZM5G879509	25	9	167	207		beta.i[28087]	0.0005481	0.03174	0.0006172	-0.06394	0.0004399	0.06161	5001	2000		pi.1[28087]	0.5626	0.2212	0.004984	0.04923	0.6097	0.874	5001	2000
GRMZM2G109448	34	49	93	122		beta.i[33082]	0.002156	0.03198	0.000621	-0.06127	0.002583	0.06379	5001	2000		pi.1[33082]	0.5574	0.2123	0.004794	0.04925	0.5946	0.864	5001	2000
GRMZM2G176612	9	22	59	131		beta.i[6728]	0.001558	0.0328	0.000831	-0.05924	0.002315	0.06502	5001	2000		pi.1[6728]	0.6291	0.2381	0.00583	0.04926	0.6842	0.9338	5001	2000
GRMZM5G861268	6	14	107	109		beta.i[31592]	0.0008486	0.0303	0.0006552	-0.05639	0.001565	0.05865	5001	2000		pi.1[31592]	0.6523	0.2442	0.00565	0.04928	0.7099	0.9515	5001	2000
Z556K20.5	45	10	298	433		beta.i[11859]	0.001088	0.03226	0.0009822	-0.06179	0.000816	0.06494	5001	2000		pi.1[11859]	0.55	0.2096	0.004693	0.04931	0.5861	0.8523	5001	2000
GRMZM2G149175	44	70	57	120		beta.i[37177]	0.0005426	0.03098	0.0007599	-0.06167	0.0005353	0.06116	5001	2000		pi.1[37177]	0.5444	0.2121	0.004701	0.04933	0.5777	0.8489	5001	2000
GRMZM5G863229	52	27	92	85		beta.i[23226]	0.001119	0.03152	0.000706	-0.06035	0.001036	0.06199	5001	2000		pi.1[23226]	0.5244	0.2083	0.004657	0.04934	0.5517	0.8476	5001	2000
GRMZM2G077995	31	38	81	98		beta.i[40031]	0.001338	0.03099	0.0007542	-0.05855	0.002016	0.06023	5001	2000		pi.1[40031]	0.5546	0.2199	0.004761	0.04935	0.5899	0.8717	5001	2000
GRMZM2G137696	36	16	94	489		beta.i[21118]	0.001579	0.03204	0.000846	-0.06078	0.00231	0.06563	5001	2000		pi.1[21118]	0.5706	0.2145	0.005563	0.04939	0.6125	0.8675	5001	2000
GRMZM2G063917	2	8	57	223		beta.i[20101]	0.002154	0.03193	0.0009273	-0.06164	0.001822	0.06611	5001	2000		pi.1[20101]	0.7246	0.2674	0.00657	0.0494	0.8125	0.9922	5001	2000
GRMZM5G866722	32	7	288	304		beta.i[14315]	0.00253	0.03188	0.0008077	-0.0613	0.00269	0.06564	5001	2000		pi.1[14315]	0.546	0.2218	0.004764	0.04947	0.5835	0.8691	5001	2000
GRMZM2G149946	38	46	98	103		beta.i[6233]	0.0005771	0.03182	0.0007786	-0.06285	0.0007373	0.06267	5001	2000		pi.1[6233]	0.55	0.2173	0.004189	0.04952	0.5905	0.8591	5001	2000
GRMZM2G313944	26	22	107	159		beta.i[12532]	0.001368	0.03111	0.0006992	-0.05769	0.001775	0.06355	5001	2000		pi.1[12532]	0.5732	0.2156	0.00473	0.04959	0.6097	0.8809	5001	2000
GRMZM2G114093	35	16	178	152		beta.i[5564]	0.001224	0.0313	0.000873	-0.0614	0.001274	0.06271	5001	2000		pi.1[5564]	0.5473	0.2174	0.006427	0.0496	0.5886	0.8617	5001	2000
GRMZM2G028594	22	31	89	124		beta.i[39552]	0.002415	0.03101	0.0006652	-0.06009	0.003338	0.06296	5001	2000		pi.1[39552]	0.5782	0.2206	0.005114	0.0496	0.6137	0.891	5001	2000
GRMZM2G096546	7	12	66	216		beta.i[11187]	0.0005779	0.03161	0.0006253	-0.06042	0.001158	0.06494	5001	2000		pi.1[11187]	0.6553	0.2443	0.006346	0.04962	0.7161	0.9482	5001	2000
GRMZM2G043441	35	26	86	109		beta.i[4186]	0.001197	0.03164	0.0007357	-0.05976	0.001438	0.06406	5001	2000		pi.1[4186]	0.5497	0.2158	0.005163	0.04963	0.5834	0.8637	5001	2000
GRMZM2G022386	63	46	140	93		beta.i[15116]	0.001309	0.03177	0.0007847	-0.06216	0.001749	0.06438	5001	2000		pi.1[15116]	0.5312	0.2044	0.004439	0.04965	0.5626	0.8269	5001	2000
GRMZM2G038388	23	23	105	129		beta.i[32348]	0.001136	0.03184	0.0006884	-0.0608	0.0006118	0.06408	5001	2000		pi.1[32348]	0.577	0.2233	0.004744	0.04966	0.6194	0.8888	5001	2000
GRMZM2G092578	60	113	43	81		beta.i[5116]	0.00246	0.03121	0.0006824	-0.06048	0.00275	0.06366	5001	2000		pi.1[5116]	0.5252	0.2086	0.005141	0.04969	0.5547	0.8337	5001	2000
GRMZM2G302080	93	12	414	169		beta.i[37575]	0.002369	0.03188	0.0007563	-0.05857	0.002055	0.06348	5001	2000		pi.1[37575]	0.4909	0.2011	0.005333	0.04972	0.5207	0.8061	5001	2000
GRMZM2G122780	79	111	59	51		beta.i[33201]	0.001177	0.03145	0.0008812	-0.06109	0.001195	0.06197	5001	2000		pi.1[33201]	0.5051	0.205	0.00523	0.04978	0.5339	0.8211	5001	2000
GRMZM2G116087	23	30	66	192		beta.i[36801]	-0.0006293	0.03124	0.0006371	-0.05999	-0.000783	0.06046	5001	2000		pi.1[36801]	0.5768	0.2201	0.004071	0.04978	0.6193	0.8803	5001	2000
GRMZM2G016958	306	44	124	283		beta.i[32121]	0.001815	0.03182	0.0007465	-0.05973	0.00184	0.06445	5001	2000		pi.1[32121]	0.4686	0.184	0.004235	0.04979	0.4839	0.7629	5001	2000
GRMZM2G134260	64	24	98	102		beta.i[40583]	0.0006142	0.03207	0.0007218	-0.06473	0.0007405	0.06166	5001	2000		pi.1[40583]	0.5112	0.2066	0.004582	0.04983	0.5394	0.8352	5001	2000
GRMZM5G882427	4	13	86	249		beta.i[14434]	0.0004238	0.03225	0.0006532	-0.06249	0.001256	0.06302	5001	2000		pi.1[14434]	0.7055	0.242	0.006372	0.04985	0.7729	0.9783	5001	2000
GRMZM2G181445	387	561	29	41		beta.i[6817]	0.001073	0.03094	0.0007734	-0.06152	0.001113	0.06255	5001	2000		pi.1[6817]	0.4456	0.1824	0.003668	0.04986	0.4614	0.7528	5001	2000
GRMZM2G063961	64	21	130	174		beta.i[29036]	0.0003114	0.03182	0.0007233	-0.06251	0.0008401	0.06138	5001	2000		pi.1[29036]	0.5207	0.2049	0.004798	0.04995	0.5501	0.8337	5001	2000
GRMZM2G063511	57	61	89	163		beta.i[36174]	0.001379	0.03193	0.0007698	-0.0606	0.001094	0.06576	5001	2000		pi.1[36174]	0.5481	0.2028	0.004854	0.04996	0.5831	0.8484	5001	2000
GRMZM2G071871	15	11	118	133		beta.i[36267]	0.0006444	0.0327	0.000682	-0.06075	0.0007274	0.06631	5001	2000		pi.1[36267]	0.5821	0.2278	0.004841	0.05004	0.6243	0.9003	5001	2000
GRMZM2G015730	19	38	83	93		beta.i[39456]	0.0009017	0.03116	0.0007547	-0.06066	0.001147	0.0629	5001	2000		pi.1[39456]	0.5789	0.2228	0.005324	0.05006	0.6139	0.8929	5001	2000
GRMZM2G070615	6	16	35	268		beta.i[15802]	0.002102	0.0319	0.0006577	-0.05984	0.00148	0.06714	5001	2000		pi.1[15802]	0.6642	0.2458	0.006023	0.05007	0.7302	0.9629	5001	2000
GRMZM2G130800	9	13	43	300		beta.i[16551]	0.001829	0.03116	0.0006454	-0.06118	0.001821	0.06232	5001	2000		pi.1[16551]	0.6268	0.2402	0.005376	0.05007	0.6812	0.936	5001	2000
GRMZM2G170112	36	72	44	87		beta.i[33657]	0.000389	0.03177	0.0006787	-0.06032	-0.0005173	0.06286	5001	2000		pi.1[33657]	0.5456	0.2173	0.003831	0.05013	0.5874	0.8684	5001	2000
GRMZM2G000781	104	123	61	65		beta.i[19282]	0.002115	0.03117	0.0007547	-0.05848	0.003144	0.06243	5001	2000		pi.1[19282]	0.5108	0.1976	0.004243	0.05017	0.534	0.8056	5001	2000
GRMZM2G113944	156	103	79	60		beta.i[5559]	0.002254	0.03188	0.0007347	-0.06011	0.00307	0.06498	5001	2000		pi.1[5559]	0.4832	0.1925	0.004277	0.0502	0.5054	0.7936	5001	2000
GRMZM5G899600	86	166	44	76		beta.i[9385]	0.001927	0.03205	0.0006741	-0.06155	0.00191	0.06341	5001	2000		pi.1[9385]	0.508	0.2003	0.004808	0.0502	0.5406	0.8134	5001	2000
GRMZM2G164136	56	60	77	125		beta.i[40864]	0.001583	0.03114	0.0007634	-0.05884	0.00188	0.06286	5001	2000		pi.1[40864]	0.5368	0.2028	0.005366	0.05023	0.5697	0.8413	5001	2000
GRMZM2G330719	59	90	60	39		beta.i[37687]	0.002307	0.03175	0.0006464	-0.057	0.002029	0.0652	5001	2000		pi.1[37687]	0.5164	0.2116	0.004123	0.05025	0.5471	0.8434	5001	2000
GRMZM5G876389	15	8	151	173		beta.i[9194]	0.0009835	0.03126	0.0006293	-0.05981	1.325e-05	0.0636	5001	2000		pi.1[9194]	0.5828	0.2307	0.005579	0.05031	0.6286	0.9077	5001	2000
GRMZM2G099206	41	49	85	94		beta.i[16197]	0.0006096	0.03163	0.0006255	-0.05911	0.0004971	0.06411	5001	2000		pi.1[16197]	0.5434	0.21	0.004385	0.05037	0.5765	0.8537	5001	2000
GRMZM2G042712	30	34	68	117		beta.i[10369]	0.0009895	0.03186	0.0007582	-0.06145	0.0002149	0.06567	5001	2000		pi.1[10369]	0.5527	0.2204	0.006219	0.05038	0.5927	0.8709	5001	2000
GRMZM2G083179	40	46	55	90		beta.i[4951]	0.001664	0.03254	0.0006787	-0.06195	0.001123	0.06531	5001	2000		pi.1[4951]	0.5398	0.2198	0.005169	0.05051	0.5696	0.8649	5001	2000
EF517601.1_FG015	23	30	93	177		beta.i[14839]	0.001573	0.03205	0.000788	-0.06188	0.001377	0.06441	5001	2000		pi.1[14839]	0.5896	0.223	0.005	0.05051	0.6363	0.8924	5001	2000
GRMZM2G004435	29	35	73	113		beta.i[28464]	0.00147	0.03216	0.0007715	-0.06211	0.0008786	0.06636	5001	2000		pi.1[28464]	0.5645	0.2177	0.004438	0.05053	0.6013	0.8767	5001	2000
GRMZM2G347226	118	29	141	148		beta.i[1905]	0.001289	0.03074	0.0008024	-0.05861	0.00211	0.06035	5001	2000		pi.1[1905]	0.4963	0.1975	0.004667	0.05054	0.5231	0.8046	5001	2000
GRMZM2G071401	11	12	165	92		beta.i[32702]	0.00322	0.0316	0.0007509	-0.06039	0.002861	0.06738	5001	2000		pi.1[32702]	0.6073	0.2367	0.0049	0.05055	0.6565	0.9256	5001	2000
AC183315.4_FG006	24	10	194	211		beta.i[14560]	0.001312	0.03183	0.0006619	-0.06082	0.00165	0.06311	5001	2000		pi.1[14560]	0.5719	0.2131	0.005432	0.05057	0.6077	0.8731	5001	2000
GRMZM2G114772	19	34	57	105		beta.i[5577]	0.001755	0.0311	0.0006676	-0.05931	0.001704	0.06392	5001	2000		pi.1[5577]	0.5844	0.224	0.006009	0.05061	0.6282	0.8957	5001	2000
GRMZM2G107651	15	47	67	90		beta.i[40320]	0.0004598	0.03107	0.0005508	-0.06068	0.0009832	0.06378	5001	2000		pi.1[40320]	0.5963	0.2238	0.005059	0.05063	0.6315	0.9017	5001	2000
GRMZM2G323470	22	42	86	102		beta.i[21848]	0.002077	0.03169	0.0006902	-0.05905	0.001285	0.06232	5001	2000		pi.1[21848]	0.5795	0.2132	0.005147	0.05067	0.6176	0.8803	5001	2000
GRMZM2G070045	26	36	69	127		beta.i[24636]	-0.0001435	0.03166	0.0007014	-0.06319	0.0009266	0.0624	5001	2000		pi.1[24636]	0.5792	0.2148	0.004532	0.05071	0.6191	0.8823	5001	2000
GRMZM5G866914	28	55	77	97		beta.i[31619]	0.001544	0.03239	0.0007469	-0.06466	0.002484	0.06317	5001	2000		pi.1[31619]	0.5656	0.2182	0.004823	0.05078	0.6006	0.8666	5001	2000
GRMZM2G140970	26	37	82	106		beta.i[11827]	0.0005745	0.03151	0.0006	-0.05937	-0.0001184	0.06274	5001	2000		pi.1[11827]	0.5569	0.2281	0.004844	0.0508	0.6028	0.8803	5001	2000
GRMZM2G037335	44	53	59	100		beta.i[536]	0.0005099	0.03037	0.0006891	-0.06074	0.0004339	0.05951	5001	2000		pi.1[536]	0.5358	0.2109	0.004815	0.0509	0.571	0.8511	5001	2000
GRMZM5G818936	458	55	109	204		beta.i[8767]	0.001782	0.03161	0.0007674	-0.05779	0.001491	0.06497	5001	2000		pi.1[8767]	0.454	0.1794	0.004326	0.05096	0.4698	0.7478	5001	2000
GRMZM2G074824	49	109	51	79		beta.i[36301]	0.001385	0.03149	0.0006413	-0.06123	0.001421	0.06019	5001	2000		pi.1[36301]	0.5398	0.2046	0.004238	0.05096	0.5707	0.8442	5001	2000
GRMZM2G439971	23	55	49	147		beta.i[38173]	0.001135	0.03161	0.0007432	-0.06078	0.001337	0.06254	5001	2000		pi.1[38173]	0.5812	0.2199	0.004666	0.05097	0.6214	0.8887	5001	2000
GRMZM2G152864	181	190	36	68		beta.i[1485]	0.001941	0.0317	0.0007292	-0.06006	0.001691	0.06391	5001	2000		pi.1[1485]	0.4742	0.1913	0.00478	0.05098	0.4935	0.7903	5001	2000
GRMZM2G082199	11	106	66	58		beta.i[15961]	0.001539	0.03183	0.0007675	-0.0623	0.001241	0.06539	5001	2000		pi.1[15961]	0.6052	0.234	0.005906	0.05104	0.6499	0.9219	5001	2000
GRMZM2G103113	23	68	59	68		beta.i[40265]	0.001705	0.03153	0.0006989	-0.05834	0.0007637	0.06315	5001	2000		pi.1[40265]	0.571	0.2168	0.004652	0.05109	0.611	0.8811	5001	2000
GRMZM2G063909	77	38	85	124		beta.i[20100]	0.0008302	0.03086	0.0008593	-0.06014	0.0009338	0.06112	5001	2000		pi.1[20100]	0.5171	0.2037	0.004153	0.05111	0.5514	0.8201	5001	2000
GRMZM2G098212	31	27	121	133		beta.i[36603]	0.0001035	0.03174	0.000782	-0.06353	5.374e-05	0.06238	5001	2000		pi.1[36603]	0.56	0.2208	0.0044	0.05111	0.6015	0.8724	5001	2000
GRMZM2G065854	272	48	216	148		beta.i[15739]	0.001037	0.03099	0.0009172	-0.06091	0.001981	0.06075	5001	2000		pi.1[15739]	0.4793	0.1804	0.004112	0.05114	0.4985	0.7689	5001	2000
GRMZM2G034882	26	46	66	93		beta.i[520]	0.001098	0.03113	0.0007744	-0.06117	0.002376	0.06015	5001	2000		pi.1[520]	0.5652	0.2175	0.004358	0.05118	0.5986	0.8832	5001	2000
AC200101.4_FG002	24	15	160	110		beta.i[39170]	0.002368	0.03214	0.000643	-0.06147	0.002545	0.06419	5001	2000		pi.1[39170]	0.5669	0.2208	0.004254	0.05119	0.6055	0.8757	5001	2000
GRMZM2G178660	74	34	119	165		beta.i[37529]	0.002026	0.03178	0.0006578	-0.05903	0.002087	0.06612	5001	2000		pi.1[37529]	0.5201	0.2019	0.004692	0.05131	0.5453	0.8252	5001	2000
GRMZM2G171987	84	49	105	114		beta.i[26185]	0.001933	0.03197	0.0005674	-0.06107	0.002331	0.06298	5001	2000		pi.1[26185]	0.5135	0.2016	0.003878	0.0514	0.5367	0.8115	5001	2000
GRMZM2G321041	9	42	67	78		beta.i[6984]	0.0007929	0.03114	0.0005521	-0.06238	0.0005065	0.06217	5001	2000		pi.1[6984]	0.6278	0.2348	0.004736	0.05144	0.6783	0.9337	5001	2000
GRMZM2G117771	56	65	69	133		beta.i[11504]	0.001066	0.03112	0.0006614	-0.06166	0.0008144	0.0646	5001	2000		pi.1[11504]	0.5407	0.2066	0.004505	0.05145	0.574	0.8416	5001	2000
gpc4	74	16	132	421		beta.i[26233]	0.000155	0.0317	0.0006516	-0.06082	0.0001316	0.06513	5001	2000		pi.1[26233]	0.5216	0.2059	0.004398	0.05147	0.5502	0.8332	5001	2000
GRMZM2G118675	179	188	48	85		beta.i[5660]	0.002167	0.03152	0.0007483	-0.0602	0.002087	0.0649	5001	2000		pi.1[5660]	0.4832	0.1924	0.004867	0.0515	0.5095	0.7875	5001	2000
GRMZM2G127548	67	34	103	122		beta.i[20997]	0.002227	0.03147	0.0006514	-0.05637	0.002193	0.06431	5001	2000		pi.1[20997]	0.5214	0.2078	0.004562	0.05152	0.5543	0.8391	5001	2000
GRMZM5G856436	63	54	88	113		beta.i[9047]	0.001951	0.03216	0.0005958	-0.06455	0.002804	0.06347	5001	2000		pi.1[9047]	0.5294	0.2022	0.00594	0.05154	0.556	0.8446	5001	2000
GRMZM2G095778	76	56	75	135		beta.i[25010]	0.001587	0.03209	0.0006797	-0.06323	0.001201	0.06464	5001	2000		pi.1[25010]	0.5199	0.2021	0.004373	0.05155	0.5478	0.8284	5001	2000
GRMZM2G124377	41	40	100	101		beta.i[25466]	0.002185	0.0317	0.0007662	-0.05954	0.002361	0.0633	5001	2000		pi.1[25466]	0.5429	0.2138	0.005094	0.05159	0.574	0.8604	5001	2000
TUBB6	11	47	59	164		beta.i[15823]	0.002053	0.03121	0.0007678	-0.05825	0.002241	0.06181	5001	2000		pi.1[15823]	0.6334	0.2225	0.005644	0.0516	0.6884	0.9227	5001	2000
LPE1	27	35	97	95		beta.i[9062]	-0.0009068	0.03142	0.0007351	-0.06219	-0.0004109	0.05809	5001	2000		pi.1[9062]	0.5593	0.2173	0.004959	0.05166	0.5931	0.877	5001	2000
GRMZM2G374629	40	86	60	67		beta.i[22092]	0.001597	0.03104	0.0006775	-0.05871	0.0007505	0.06298	5001	2000		pi.1[22092]	0.5462	0.2086	0.004532	0.05169	0.5807	0.858	5001	2000
GRMZM5G806771	47	42	130	79		beta.i[22976]	0.0009617	0.03137	0.0007419	-0.06036	0.001014	0.06198	5001	2000		pi.1[22976]	0.5403	0.2084	0.00515	0.05172	0.5761	0.8587	5001	2000
GRMZM2G069298	2	3	41	1140		beta.i[24624]	0.0002013	0.03056	0.0007614	-0.06121	0.000842	0.06092	5001	2000		pi.1[24624]	0.7422	0.2611	0.005937	0.05172	0.8274	0.9959	5001	2000
GRMZM2G473138	5	7	113	182		beta.i[2344]	0.0004312	0.03197	0.0006298	-0.06134	0.0004125	0.06217	5001	2000		pi.1[2344]	0.6794	0.2423	0.00565	0.05177	0.7423	0.9699	5001	2000
GRMZM2G174136	30	14	191	171		beta.i[6673]	0.001801	0.03103	0.0008004	-0.05663	0.002123	0.06275	5001	2000		pi.1[6673]	0.5559	0.2151	0.004761	0.05185	0.5917	0.8684	5001	2000
GRMZM2G173309	52	46	96	88		beta.i[12313]	0.001493	0.03195	0.0006608	-0.06158	0.0009072	0.06537	5001	2000		pi.1[12313]	0.5398	0.2055	0.004055	0.05188	0.5706	0.8432	5001	2000
GRMZM2G171986	62	67	64	125		beta.i[40932]	0.001609	0.03148	0.0006797	-0.06121	0.001746	0.06116	5001	2000		pi.1[40932]	0.526	0.2046	0.003986	0.0519	0.5554	0.8431	5001	2000
GRMZM5G812926	2	14	82	204		beta.i[8714]	0.0005596	0.03164	0.0006073	-0.06289	0.0002901	0.06308	5001	2000		pi.1[8714]	0.7273	0.2495	0.006112	0.05191	0.7995	0.9906	5001	2000
GRMZM2G404043	66	33	89	189		beta.i[38018]	0.000929	0.03154	0.0005745	-0.06085	0.001205	0.06292	5001	2000		pi.1[38018]	0.5231	0.2053	0.004557	0.05194	0.5548	0.8264	5001	2000
GRMZM2G142740	10	9	159	189		beta.i[33411]	0.0009097	0.03173	0.0007023	-0.0603	0.00127	0.06338	5001	2000		pi.1[33411]	0.6267	0.2303	0.005492	0.05195	0.6705	0.9273	5001	2000
GRMZM2G160527	66	113	68	60		beta.i[12121]	0.002125	0.03216	0.0008147	-0.06197	0.002837	0.06599	5001	2000		pi.1[12121]	0.5178	0.2031	0.00471	0.052	0.5499	0.8335	5001	2000
GRMZM2G174671	57	36	119	182		beta.i[1646]	0.001381	0.03138	0.0007445	-0.05819	0.0006641	0.06558	5001	2000		pi.1[1646]	0.534	0.2088	0.005247	0.05201	0.5688	0.8448	5001	2000
GRMZM2G412604	13	37	84	75		beta.i[26919]	0.0006878	0.03106	0.0006298	-0.06168	0.0007293	0.06175	5001	2000		pi.1[26919]	0.608	0.2281	0.004829	0.05211	0.6577	0.907	5001	2000
GRMZM2G060906	29	45	86	92		beta.i[10659]	0.0003904	0.03153	0.0007037	-0.06058	-0.0002785	0.0631	5001	2000		pi.1[10659]	0.5663	0.2189	0.004663	0.05212	0.6013	0.8804	5001	2000
GRMZM5G841690	163	44	104	166		beta.i[8941]	0.0008202	0.03161	0.0006374	-0.06069	0.001744	0.06102	5001	2000		pi.1[8941]	0.4854	0.1973	0.003597	0.05219	0.5163	0.7908	5001	2000
GRMZM2G151113	28	105	55	61		beta.i[25872]	0.00263	0.03167	0.0007695	-0.05713	0.002965	0.06643	5001	2000		pi.1[25872]	0.5588	0.2179	0.005661	0.05219	0.5968	0.8695	5001	2000
GRMZM2G041312	82	51	124	134		beta.i[10347]	0.002212	0.0327	0.000736	-0.06116	0.001555	0.06757	5001	2000		pi.1[10347]	0.5227	0.1995	0.003669	0.0522	0.5477	0.8276	5001	2000
GRMZM2G061990	51	17	163	161		beta.i[15674]	0.002015	0.03152	0.0007389	-0.0621	0.002108	0.06431	5001	2000		pi.1[15674]	0.5294	0.2094	0.004422	0.05231	0.5659	0.837	5001	2000
GRMZM2G588100	11	6	141	316		beta.i[41935]	0.0005142	0.03158	0.0007676	-0.06126	0.00107	0.06043	5001	2000		pi.1[41935]	0.623	0.231	0.006331	0.05231	0.6758	0.9256	5001	2000
GRMZM2G134248	230	47	84	89		beta.i[21076]	0.001955	0.03183	0.0007342	-0.05851	0.002037	0.06441	5001	2000		pi.1[21076]	0.4632	0.1882	0.004129	0.05235	0.4827	0.7743	5001	2000
GRMZM2G138097	15	33	93	76		beta.i[16649]	0.001402	0.03122	0.0007164	-0.05764	0.002325	0.06188	5001	2000		pi.1[16649]	0.5904	0.2284	0.005225	0.05237	0.6285	0.9054	5001	2000
GRMZM2G081642	40	52	68	112		beta.i[24806]	-0.0003772	0.03119	0.000674	-0.06001	-0.0005408	0.06367	5001	2000		pi.1[24806]	0.5476	0.2114	0.004808	0.0524	0.5791	0.8532	5001	2000
GRMZM2G077150	40	51	75	108		beta.i[10898]	0.002708	0.03135	0.0007235	-0.05775	0.003408	0.0634	5001	2000		pi.1[10898]	0.5514	0.2111	0.005417	0.05246	0.5856	0.8552	5001	2000
GRMZM2G401147	33	78	70	108		beta.i[7557]	0.00118	0.03155	0.0006492	-0.06058	0.0003906	0.06247	5001	2000		pi.1[7557]	0.5644	0.2121	0.004309	0.05247	0.6014	0.8687	5001	2000
GRMZM2G101693	12	19	79	132		beta.i[40250]	0.001114	0.03251	0.0008384	-0.06298	0.002371	0.06426	5001	2000		pi.1[40250]	0.6004	0.2371	0.005886	0.05252	0.6446	0.9189	5001	2000
GRMZM2G007734	6	12	124	131		beta.i[19378]	-0.0004575	0.03182	0.0007355	-0.06167	-0.001226	0.06161	5001	2000		pi.1[19378]	0.6626	0.2434	0.006079	0.05257	0.7226	0.9586	5001	2000
GRMZM2G029632	44	43	75	129		beta.i[10160]	0.001468	0.03192	0.0006605	-0.06133	0.002162	0.06312	5001	2000		pi.1[10160]	0.5447	0.2085	0.005193	0.05258	0.5759	0.8541	5001	2000
GRMZM2G456603	57	45	123	116		beta.i[7994]	0.001287	0.03086	0.0008139	-0.06052	0.002046	0.06311	5001	2000		pi.1[7994]	0.5318	0.2106	0.00474	0.05259	0.5645	0.8422	5001	2000
GRMZM2G021194	23	16	137	194		beta.i[15096]	0.0009857	0.03092	0.0007362	-0.05804	0.0003741	0.06021	5001	2000		pi.1[15096]	0.5833	0.2182	0.004681	0.05264	0.6171	0.8864	5001	2000
GRMZM2G172932	18	61	36	137		beta.i[37479]	0.0003908	0.03154	0.0006425	-0.06061	0.000351	0.06165	5001	2000		pi.1[37479]	0.5801	0.2231	0.004163	0.05265	0.6208	0.9022	5001	2000
GRMZM2G093072	210	69	330	62		beta.i[36526]	0.000857	0.03133	0.0008352	-0.05795	0.0007348	0.06298	5001	2000		pi.1[36526]	0.4826	0.1865	0.004541	0.05282	0.5063	0.777	5001	2000
GRMZM2G172330	36	28	81	166		beta.i[12295]	0.001399	0.03221	0.0006468	-0.06045	0.001121	0.06582	5001	2000		pi.1[12295]	0.5542	0.215	0.005934	0.05291	0.5857	0.8613	5001	2000
GRMZM2G034684	47	61	36	245		beta.i[15280]	0.0008957	0.03153	0.0007585	-0.06081	0.0006158	0.06505	5001	2000		pi.1[15280]	0.5468	0.2103	0.003745	0.05291	0.58	0.859	5001	2000
GRMZM2G050512	16	43	111	112		beta.i[4341]	0.0008471	0.03177	0.0007338	-0.06078	0.0002786	0.06154	5001	2000		pi.1[4341]	0.602	0.222	0.00547	0.05295	0.6478	0.9045	5001	2000
ids1	79	26	166	273		beta.i[9096]	0.001079	0.03193	0.0007246	-0.05727	0.0008524	0.06779	5001	2000		pi.1[9096]	0.5297	0.2016	0.004325	0.05295	0.5581	0.826	5001	2000
GRMZM2G118074	38	31	83	113		beta.i[33175]	-0.0007368	0.03125	0.0006786	-0.06397	0.0001633	0.05972	5001	2000		pi.1[33175]	0.5437	0.2108	0.00431	0.05299	0.5752	0.8534	5001	2000
GRMZM2G095811	124	22	289	197		beta.i[25011]	-0.0003964	0.03208	0.0008758	-0.0627	-0.0008334	0.06167	5001	2000		pi.1[25011]	0.5065	0.1926	0.004379	0.05301	0.532	0.8107	5001	2000
GRMZM2G067419	9	7	288	98		beta.i[39944]	0.001403	0.03156	0.0007333	-0.05849	0.0007754	0.06509	5001	2000		pi.1[39944]	0.6089	0.2371	0.006312	0.05304	0.6524	0.9294	5001	2000
AC233885.1_FG001	14	47	58	83		beta.i[23710]	0.001709	0.03114	0.0006471	-0.05886	0.001264	0.05998	5001	2000		pi.1[23710]	0.5976	0.2281	0.005137	0.05308	0.6465	0.9116	5001	2000
GRMZM2G034495	10	46	58	91		beta.i[35856]	0.0009785	0.03205	0.0006732	-0.05996	0.001302	0.0659	5001	2000		pi.1[35856]	0.6217	0.2287	0.005077	0.05308	0.6685	0.9279	5001	2000
GRMZM2G018059	4	8	102	109		beta.i[9979]	0.002284	0.03102	0.0005748	-0.05776	0.002203	0.06178	5001	2000		pi.1[9979]	0.6751	0.2562	0.007393	0.05312	0.7479	0.9742	5001	2000
GRMZM2G134529	38	23	141	126		beta.i[16605]	0.0002791	0.03148	0.0007039	-0.06118	0.000288	0.06087	5001	2000		pi.1[16605]	0.5519	0.2109	0.005503	0.05317	0.5839	0.8619	5001	2000
GRMZM2G436707	248	428	20	144		beta.i[27076]	0.001971	0.0318	0.000888	-0.05974	0.002028	0.06588	5001	2000		pi.1[27076]	0.4661	0.1862	0.004125	0.05319	0.4845	0.7647	5001	2000
GRMZM2G150541	49	42	87	121		beta.i[11969]	0.001476	0.03142	0.0006846	-0.05879	0.0008788	0.06323	5001	2000		pi.1[11969]	0.5338	0.209	0.004469	0.05323	0.5665	0.8496	5001	2000
GRMZM2G444743	280	18	520	328		beta.i[27100]	0.0006093	0.03177	0.0007723	-0.06362	0.001209	0.06238	5001	2000		pi.1[27100]	0.469	0.183	0.003602	0.05323	0.4876	0.7709	5001	2000
GRMZM2G007249	64	6	894	488		beta.i[32031]	0.0007434	0.03076	0.0007959	-0.06097	0.0004277	0.06082	5001	2000		pi.1[32031]	0.5322	0.2015	0.004404	0.05334	0.5634	0.8349	5001	2000
GRMZM2G079034	37	9	243	274		beta.i[36357]	0.001776	0.03231	0.0007272	-0.05933	0.002341	0.06543	5001	2000		pi.1[36357]	0.5448	0.212	0.004712	0.05334	0.5787	0.8585	5001	2000
GRMZM2G145482	45	35	64	121		beta.i[25794]	0.001406	0.03062	0.0006527	-0.05526	0.00118	0.06361	5001	2000		pi.1[25794]	0.5384	0.2122	0.004996	0.05337	0.5711	0.8515	5001	2000
GRMZM2G444797	49	63	96	118		beta.i[13365]	0.0005125	0.03128	0.0007726	-0.06107	0.0009084	0.06282	5001	2000		pi.1[13365]	0.5423	0.207	0.005428	0.05338	0.5675	0.8442	5001	2000
GRMZM2G127911	106	70	149	76		beta.i[40536]	0.001391	0.03079	0.0006081	-0.05599	0.0007675	0.06268	5001	2000		pi.1[40536]	0.5023	0.196	0.005205	0.05338	0.5269	0.8025	5001	2000
GRMZM2G031523	13	31	168	105		beta.i[3947]	0.002079	0.03146	0.0006482	-0.0594	0.002396	0.06565	5001	2000		pi.1[3947]	0.6245	0.2192	0.004818	0.05339	0.664	0.9134	5001	2000
GRMZM2G005209	51	46	107	86		beta.i[39354]	0.001861	0.03201	0.0005808	-0.05969	0.00232	0.06423	5001	2000		pi.1[39354]	0.5339	0.2056	0.005121	0.05339	0.5627	0.8392	5001	2000
MOCS3-1	27	52	101	112		beta.i[40827]	0.00159	0.03198	0.0006339	-0.06179	0.001924	0.06315	5001	2000		pi.1[40827]	0.5717	0.2181	0.005051	0.05339	0.6132	0.8756	5001	2000
GRMZM2G090241	40	41	94	85		beta.i[20458]	0.0001536	0.03172	0.0006862	-0.06299	0.001477	0.06179	5001	2000		pi.1[20458]	0.5466	0.2181	0.005124	0.05342	0.5769	0.8664	5001	2000
GRMZM2G561040	32	44	55	105		beta.i[41884]	0.001161	0.03231	0.000682	-0.06384	0.001696	0.0655	5001	2000		pi.1[41884]	0.5527	0.2164	0.004716	0.05342	0.5931	0.8591	5001	2000
GRMZM2G176216	318	222	73	37		beta.i[12362]	0.002499	0.0314	0.0007359	-0.06023	0.00259	0.06359	5001	2000		pi.1[12362]	0.4621	0.1862	0.004032	0.05346	0.4811	0.7601	5001	2000
AC198353.5_FG001	3	13	56	261		beta.i[9501]	-0.0001444	0.03139	0.000595	-0.06222	-0.0007517	0.0613	5001	2000		pi.1[9501]	0.7229	0.2496	0.006643	0.05347	0.7956	0.9914	5001	2000
ZCN24	9	8	247	130		beta.i[34344]	0.0003746	0.03118	0.0007444	-0.05923	-6.302e-05	0.06127	5001	2000		pi.1[34344]	0.6314	0.2272	0.005335	0.05347	0.6741	0.9334	5001	2000
GRMZM5G831835	130	125	61	89		beta.i[23091]	0.00182	0.03112	0.0006794	-0.06153	0.0023	0.06147	5001	2000		pi.1[23091]	0.4946	0.1924	0.004458	0.05352	0.5164	0.794	5001	2000
GRMZM2G011253	50	36	102	85		beta.i[19433]	0.002195	0.03174	0.0006062	-0.0586	0.001709	0.06526	5001	2000		pi.1[19433]	0.5375	0.2062	0.004678	0.05359	0.5689	0.8496	5001	2000
GRMZM2G119745	29	55	69	106		beta.i[11527]	0.001552	0.03121	0.000733	-0.0617	0.002155	0.06123	5001	2000		pi.1[11527]	0.5626	0.2186	0.004351	0.05362	0.5977	0.8824	5001	2000
GRMZM2G095931	24	32	87	104		beta.i[5193]	0.001877	0.03197	0.0007035	-0.0618	0.001652	0.06667	5001	2000		pi.1[5193]	0.5688	0.2178	0.004873	0.05366	0.6031	0.8836	5001	2000
GRMZM2G328224	14	113	44	74		beta.i[7029]	0.001156	0.032	0.0006932	-0.06395	0.001766	0.06288	5001	2000		pi.1[7029]	0.6098	0.2217	0.004903	0.0537	0.6547	0.9072	5001	2000
GRMZM5G838754	40	40	89	122		beta.i[2699]	0.0006565	0.0318	0.0006354	-0.05972	0.000172	0.06419	5001	2000		pi.1[2699]	0.5517	0.209	0.005143	0.05376	0.5854	0.8573	5001	2000
GRMZM2G032376	26	39	69	99		beta.i[32291]	0.0009416	0.03193	0.0007283	-0.06134	0.001007	0.06511	5001	2000		pi.1[32291]	0.5644	0.2178	0.004608	0.05376	0.6039	0.8769	5001	2000
GRMZM2G129554	30	45	115	59		beta.i[25558]	0.002042	0.03144	0.0006818	-0.05763	0.001768	0.06559	5001	2000		pi.1[25558]	0.5517	0.2153	0.005454	0.05379	0.5872	0.8598	5001	2000
GRMZM2G144042	30	66	85	55		beta.i[25765]	0.002091	0.03233	0.0007448	-0.06141	0.001074	0.06528	5001	2000		pi.1[25765]	0.5637	0.2194	0.005198	0.05385	0.5984	0.8729	5001	2000
GRMZM2G085474	161	87	88	89		beta.i[4990]	0.001596	0.03205	0.00077	-0.0607	0.001034	0.06328	5001	2000		pi.1[4990]	0.4924	0.1914	0.004369	0.05389	0.5213	0.7914	5001	2000
GRMZM5G801722	40	46	96	66		beta.i[22951]	0.001573	0.03158	0.0007411	-0.059	0.001174	0.06288	5001	2000		pi.1[22951]	0.5366	0.2168	0.004117	0.0539	0.5707	0.8564	5001	2000
GRMZM5G854888	12	8	177	174		beta.i[14249]	0.001097	0.03139	0.0006443	-0.05944	0.002008	0.05988	5001	2000		pi.1[14249]	0.6056	0.2328	0.006057	0.05393	0.6507	0.9249	5001	2000
GRMZM2G038950	168	92	67	99		beta.i[552]	0.0007341	0.03147	0.0007458	-0.06249	0.0006086	0.06063	5001	2000		pi.1[552]	0.4886	0.1882	0.004817	0.05395	0.5082	0.788	5001	2000
GRMZM2G053083	163	122	70	101		beta.i[32507]	0.00142	0.03125	0.0006283	-0.05937	0.001503	0.06338	5001	2000		pi.1[32507]	0.4947	0.1902	0.004013	0.05397	0.5204	0.7895	5001	2000
GRMZM2G380361	12	8	217	231		beta.i[12966]	0.00168	0.03056	0.0007728	-0.06182	0.002111	0.0629	5001	2000		pi.1[12966]	0.6176	0.2296	0.005227	0.054	0.6653	0.9203	5001	2000
GRMZM2G095039	30	45	88	135		beta.i[16150]	0.00149	0.03181	0.0006351	-0.06062	0.002033	0.06297	5001	2000		pi.1[16150]	0.5686	0.2167	0.004091	0.05401	0.6048	0.8746	5001	2000
GRMZM2G124047	28	52	92	74		beta.i[36888]	0.001733	0.0322	0.0007255	-0.06162	0.001162	0.06285	5001	2000		pi.1[36888]	0.5684	0.2171	0.00545	0.05406	0.6142	0.8753	5001	2000
GRMZM2G133050	31	52	79	84		beta.i[40576]	0.002465	0.03171	0.0006996	-0.06256	0.002133	0.0651	5001	2000		pi.1[40576]	0.5597	0.211	0.004397	0.05406	0.5953	0.8675	5001	2000
GRMZM2G044023	40	47	93	66		beta.i[32409]	0.001549	0.03185	0.0007255	-0.06192	0.0022	0.06426	5001	2000		pi.1[32409]	0.5409	0.2126	0.004508	0.05407	0.5802	0.8575	5001	2000
GRMZM2G590027	103	96	112	50		beta.i[38590]	0.001514	0.03189	0.0006969	-0.06115	0.001947	0.06049	5001	2000		pi.1[38590]	0.4954	0.2005	0.004146	0.05407	0.5253	0.7999	5001	2000
GRMZM2G129268	116	46	165	138		beta.i[11648]	0.001273	0.03118	0.0007313	-0.0594	0.00144	0.06391	5001	2000		pi.1[11648]	0.5078	0.1927	0.003911	0.05409	0.5369	0.8043	5001	2000
GRMZM5G823193	7	4	253	233		beta.i[27759]	0.001595	0.03183	0.0008744	-0.05808	0.001435	0.06413	5001	2000		pi.1[27759]	0.6434	0.2376	0.005199	0.05412	0.6939	0.945	5001	2000
GRMZM2G060265	41	13	221	227		beta.i[4518]	0.001174	0.03182	0.0008416	-0.06009	0.002147	0.06484	5001	2000		pi.1[4518]	0.5504	0.2072	0.004256	0.05413	0.5795	0.8499	5001	2000
GRMZM2G305901	54	62	85	130		beta.i[37587]	0.001491	0.03141	0.0007217	-0.06097	0.0007387	0.06267	5001	2000		pi.1[37587]	0.5443	0.2064	0.00495	0.05415	0.5765	0.8413	5001	2000
GRMZM2G027603	44	50	67	112		beta.i[32239]	0.001712	0.03193	0.0007093	-0.06147	0.001839	0.06676	5001	2000		pi.1[32239]	0.5369	0.2177	0.003899	0.05421	0.5757	0.85	5001	2000
GRMZM2G125784	22	82	64	43		beta.i[25489]	0.001004	0.03139	0.0006932	-0.05903	0.001847	0.06147	5001	2000		pi.1[25489]	0.566	0.2194	0.005396	0.05434	0.6041	0.8831	5001	2000
GRMZM2G147656	25	48	84	69		beta.i[11919]	0.002118	0.03151	0.0007727	-0.0586	0.002575	0.06271	5001	2000		pi.1[11919]	0.5681	0.2153	0.00439	0.05435	0.5987	0.879	5001	2000
GRMZM2G039895	75	50	88	143		beta.i[28794]	0.001787	0.03117	0.00069	-0.0585	0.002473	0.06315	5001	2000		pi.1[28794]	0.5222	0.2025	0.004916	0.05442	0.5499	0.8282	5001	2000
GRMZM2G024615	36	122	51	89		beta.i[32198]	0.001437	0.03113	0.000641	-0.05759	0.001276	0.06374	5001	2000		pi.1[32198]	0.5492	0.2148	0.004953	0.05443	0.583	0.8556	5001	2000
AC234161.1_FG010	39	18	248	237		beta.i[39311]	0.0004247	0.0316	0.0008231	-0.0597	0.0005958	0.06161	5001	2000		pi.1[39311]	0.5612	0.2067	0.004352	0.05448	0.5934	0.8647	5001	2000
GRMZM2G148333	121	84	78	40		beta.i[11934]	0.002547	0.03034	0.0005437	-0.05527	0.002883	0.06472	5001	2000		pi.1[11934]	0.4817	0.1967	0.00371	0.0545	0.5026	0.7902	5001	2000
GRMZM2G071924	45	54	71	89		beta.i[800]	0.000836	0.03172	0.0006431	-0.06248	0.001612	0.06223	5001	2000		pi.1[800]	0.5436	0.2095	0.005268	0.05454	0.5711	0.8494	5001	2000
GRMZM2G158860	66	41	93	135		beta.i[21406]	0.001779	0.03101	0.0007196	-0.05847	0.002259	0.06433	5001	2000		pi.1[21406]	0.5291	0.2049	0.004541	0.05454	0.5555	0.8452	5001	2000
GRMZM2G151717	13	26	63	85		beta.i[16813]	0.00138	0.03165	0.000676	-0.06179	0.00116	0.0652	5001	2000		pi.1[16813]	0.5966	0.2282	0.005711	0.05455	0.6379	0.9106	5001	2000
GRMZM2G058900	109	23	124	228		beta.i[28971]	0.002521	0.03166	0.0006367	-0.05957	0.002781	0.06681	5001	2000		pi.1[28971]	0.4978	0.199	0.004932	0.05455	0.5216	0.805	5001	2000
GRMZM2G084576	43	59	52	92		beta.i[892]	0.001881	0.03157	0.0006737	-0.05998	0.002155	0.06344	5001	2000		pi.1[892]	0.5415	0.2135	0.004928	0.05458	0.5788	0.8447	5001	2000
GRMZM5G834521	306	218	57	81		beta.i[23105]	0.002706	0.03208	0.0007266	-0.05948	0.001406	0.06661	5001	2000		pi.1[23105]	0.4654	0.1816	0.003243	0.05474	0.4853	0.761	5001	2000
GRMZM2G015314	42	10	375	218		beta.i[28567]	0.0002462	0.03159	0.0008095	-0.06008	-0.0003197	0.06401	5001	2000		pi.1[28567]	0.5409	0.2133	0.005385	0.05474	0.5772	0.8476	5001	2000
GRMZM5G845601	2	24	35	416		beta.i[2719]	0.0003547	0.03132	0.0007124	-0.06088	-0.0002692	0.06411	5001	2000		pi.1[2719]	0.7341	0.2518	0.007318	0.05477	0.8154	0.9923	5001	2000
GRMZM2G160994	44	45	147	105		beta.i[12126]	-0.0006129	0.03099	0.000765	-0.06125	0.0001489	0.06119	5001	2000		pi.1[12126]	0.5587	0.2048	0.004719	0.05479	0.5887	0.856	5001	2000
GRMZM2G147623	32	45	99	76		beta.i[11917]	0.002148	0.03156	0.0006023	-0.05781	0.001394	0.06302	5001	2000		pi.1[11917]	0.5534	0.2144	0.004515	0.05482	0.5885	0.8665	5001	2000
GRMZM2G133749	26	33	132	84		beta.i[5934]	0.001361	0.03142	0.0008132	-0.0619	0.001511	0.06096	5001	2000		pi.1[5934]	0.5776	0.2189	0.004388	0.05484	0.6219	0.8858	5001	2000
GRMZM2G051541	28	11	161	260		beta.i[19945]	0.001092	0.03159	0.0006694	-0.06059	0.0008645	0.06172	5001	2000		pi.1[19945]	0.5714	0.215	0.005334	0.05484	0.6085	0.8768	5001	2000
GRMZM5G855361	16	15	120	250		beta.i[23193]	0.0008441	0.03199	0.0006433	-0.06276	0.0006193	0.06477	5001	2000		pi.1[23193]	0.6052	0.2209	0.004585	0.05488	0.6489	0.8995	5001	2000
GRMZM2G002138	46	41	115	104		beta.i[3367]	0.0002893	0.03228	0.0008125	-0.06281	0.0007909	0.06147	5001	2000		pi.1[3367]	0.5403	0.212	0.005235	0.05497	0.5727	0.8516	5001	2000
GRMZM2G026311	45	35	79	112		beta.i[10118]	0.001732	0.03173	0.0006778	-0.06301	0.002126	0.06243	5001	2000		pi.1[10118]	0.5379	0.215	0.00601	0.05497	0.5714	0.856	5001	2000
GRMZM2G517538	153	129	46	77		beta.i[27385]	0.003197	0.031	0.0006694	-0.05869	0.003066	0.06542	5001	2000		pi.1[27385]	0.4798	0.1957	0.00444	0.05498	0.5032	0.7908	5001	2000
GRMZM2G453424	40	58	73	119		beta.i[22475]	0.0007524	0.03092	0.0006646	-0.05858	0.0009621	0.06055	5001	2000		pi.1[22475]	0.5446	0.2096	0.004369	0.055	0.5745	0.8547	5001	2000
GRMZM2G002304	44	85	68	41		beta.i[35461]	0.001772	0.03152	0.0006237	-0.06374	0.00122	0.06232	5001	2000		pi.1[35461]	0.5317	0.2117	0.004034	0.05501	0.5687	0.8471	5001	2000
GRMZM2G174888	37	40	96	103		beta.i[30211]	0.001949	0.03132	0.000745	-0.05961	0.001387	0.06412	5001	2000		pi.1[30211]	0.5532	0.2106	0.004046	0.05506	0.5862	0.8653	5001	2000
GRMZM2G054250	17	29	88	95		beta.i[658]	0.002299	0.03161	0.0007574	-0.0596	0.001631	0.06332	5001	2000		pi.1[658]	0.5802	0.2294	0.005147	0.05509	0.6207	0.9008	5001	2000
GRMZM2G073750	22	30	92	118		beta.i[15851]	0.001161	0.03129	0.0007633	-0.0594	0.0009228	0.06309	5001	2000		pi.1[15851]	0.5827	0.2198	0.004629	0.05509	0.6255	0.8863	5001	2000
GRMZM2G158609	13	5	298	392		beta.i[16903]	0.001352	0.03128	0.0007446	-0.06033	0.001375	0.06379	5001	2000		pi.1[16903]	0.6141	0.2265	0.004997	0.05509	0.6648	0.9118	5001	2000
GRMZM2G144662	34	28	135	126		beta.i[11865]	0.0005881	0.03193	0.0008629	-0.06333	0.001591	0.0609	5001	2000		pi.1[11865]	0.5598	0.2092	0.004291	0.05516	0.5908	0.863	5001	2000
GRMZM2G137569	65	25	124	127		beta.i[29808]	0.001192	0.03137	0.0006147	-0.05949	0.001965	0.06429	5001	2000		pi.1[29808]	0.5226	0.2073	0.00488	0.05521	0.554	0.8427	5001	2000
GRMZM2G338702	85	133	70	86		beta.i[7101]	0.0007995	0.03177	0.0007397	-0.06235	0.001555	0.06547	5001	2000		pi.1[7101]	0.5155	0.1962	0.00524	0.05523	0.5438	0.8136	5001	2000
GRMZM2G055216	10	45	101	95		beta.i[32537]	0.0007736	0.03122	0.0007206	-0.0623	0.0008043	0.06371	5001	2000		pi.1[32537]	0.6308	0.2271	0.005767	0.05526	0.6771	0.9302	5001	2000
GRMZM2G145063	79	54	118	189		beta.i[33437]	0.0025	0.03113	0.0007077	-0.05947	0.002697	0.06404	5001	2000		pi.1[33437]	0.5324	0.2006	0.003638	0.05531	0.5579	0.8319	5001	2000
GRMZM2G425392	183	167	35	73		beta.i[17872]	0.0005529	0.03144	0.0007274	-0.05989	9.006e-05	0.06349	5001	2000		pi.1[17872]	0.4762	0.1911	0.004168	0.05535	0.4972	0.7856	5001	2000
GRMZM2G024992	6	6	107	201		beta.i[15151]	0.0007603	0.03104	0.0007842	-0.05925	-9.33e-05	0.05987	5001	2000		pi.1[15151]	0.6514	0.2491	0.00498	0.05538	0.7116	0.9549	5001	2000
ACO31	44	11	350	219		beta.i[809]	0.002518	0.03204	0.0007787	-0.05934	0.001937	0.06369	5001	2000		pi.1[809]	0.541	0.2123	0.004525	0.05539	0.5757	0.853	5001	2000
GRMZM2G109348	6	20	49	180		beta.i[25206]	0.000839	0.0316	0.000733	-0.05871	-8.341e-05	0.06191	5001	2000		pi.1[25206]	0.6606	0.2443	0.006287	0.05545	0.7251	0.957	5001	2000
srp30	265	71	101	69		beta.i[17371]	0.0005298	0.0318	0.0007541	-0.06211	3.332e-05	0.06531	5001	2000		pi.1[17371]	0.456	0.1884	0.003926	0.05547	0.4747	0.756	5001	2000
GRMZM2G172132	93	31	103	173		beta.i[26189]	1.93e-05	0.03188	0.0007041	-0.06052	-0.0004314	0.06396	5001	2000		pi.1[26189]	0.508	0.1988	0.00344	0.05548	0.5321	0.8122	5001	2000
GRMZM2G042818	48	53	50	115		beta.i[15391]	0.001475	0.03168	0.0006838	-0.06273	0.002085	0.06163	5001	2000		pi.1[15391]	0.5343	0.2113	0.004934	0.05553	0.5673	0.849	5001	2000
GRMZM5G827505	31	49	104	94		beta.i[38765]	0.00215	0.03173	0.0007214	-0.05994	0.001871	0.06381	5001	2000		pi.1[38765]	0.5607	0.2149	0.005566	0.05553	0.5988	0.8628	5001	2000
GRMZM2G160554	16	77	49	55		beta.i[6446]	0.0002048	0.03113	0.0006926	-0.06235	0.0008985	0.05994	5001	2000		pi.1[6446]	0.5868	0.2258	0.004685	0.05555	0.6268	0.9002	5001	2000
GRMZM2G424147	163	83	95	62		beta.i[34261]	0.001396	0.03047	0.0006017	-0.05786	0.001072	0.06213	5001	2000		pi.1[34261]	0.4854	0.193	0.004745	0.05561	0.5098	0.801	5001	2000
GRMZM2G432317	2	3	120	404		beta.i[7796]	0.0005621	0.03157	0.0007473	-0.0617	-0.0002109	0.06244	5001	2000		pi.1[7796]	0.7377	0.26	0.006979	0.05571	0.8209	0.9941	5001	2000
GRMZM2G471479	16	56	83	58		beta.i[22564]	0.002821	0.03113	0.0006572	-0.05786	0.003109	0.06283	5001	2000		pi.1[22564]	0.5954	0.2253	0.004545	0.05576	0.6398	0.9042	5001	2000
GRMZM2G028613	108	314	54	14		beta.i[463]	0.0009492	0.03167	0.0006864	-0.06061	0.001046	0.06356	5001	2000		pi.1[463]	0.4846	0.1989	0.003618	0.05577	0.5102	0.7949	5001	2000
GRMZM2G056038	97	32	132	159		beta.i[28956]	0.001311	0.03219	0.0008419	-0.05805	0.001137	0.06579	5001	2000		pi.1[28956]	0.5081	0.196	0.00418	0.05578	0.5327	0.8122	5001	2000
GRMZM2G148594	117	32	137	188		beta.i[1440]	0.0007208	0.03105	0.0006395	-0.06093	0.0007619	0.06067	5001	2000		pi.1[1440]	0.505	0.1913	0.003473	0.05584	0.5286	0.8084	5001	2000
GRMZM2G104708	31	39	64	68		beta.i[16251]	0.000457	0.03253	0.0007441	-0.06376	0.0009038	0.06457	5001	2000		pi.1[16251]	0.5421	0.2203	0.004577	0.05587	0.5794	0.8717	5001	2000
GRMZM2G012964	17	39	116	78		beta.i[28539]	1.552e-06	0.03269	0.0007563	-0.06539	-0.0005764	0.06493	5001	2000		pi.1[28539]	0.5986	0.2224	0.005157	0.05588	0.6457	0.9073	5001	2000
GRMZM2G305321	2	5	115	122		beta.i[1760]	0.0002968	0.03218	0.0007142	-0.06303	0.0003327	0.06329	5001	2000		pi.1[1760]	0.7038	0.2663	0.006532	0.05591	0.7839	0.991	5001	2000
GRMZM2G045716	7	20	77	84		beta.i[10425]	-0.0004999	0.03131	0.0007809	-0.05961	-0.0003405	0.06084	5001	2000		pi.1[10425]	0.6441	0.2429	0.006138	0.05594	0.6975	0.9484	5001	2000
GRMZM2G103119	5	4	219	234		beta.i[40266]	0.0004416	0.03189	0.0007196	-0.06147	0.0003511	0.06231	5001	2000		pi.1[40266]	0.6731	0.2505	0.006484	0.05596	0.7352	0.9725	5001	2000
GRMZM2G303964	33	91	38	131		beta.i[26338]	0.001088	0.03148	0.0008947	-0.06188	0.001705	0.06111	5001	2000		pi.1[26338]	0.5638	0.2147	0.005578	0.05597	0.6044	0.8635	5001	2000
GRMZM2G048883	34	40	88	187		beta.i[4308]	0.0009613	0.03159	0.0009096	-0.06192	0.0008632	0.06121	5001	2000		pi.1[4308]	0.5705	0.2137	0.003709	0.05603	0.6065	0.8777	5001	2000
GRMZM2G398736	28	48	95	97		beta.i[41408]	0.0005608	0.03154	0.0008842	-0.05866	-0.0001383	0.06294	5001	2000		pi.1[41408]	0.5694	0.212	0.005247	0.05606	0.6054	0.8739	5001	2000
GRMZM5G863696	228	21	318	245		beta.i[34990]	0.001118	0.03159	0.0009082	-0.05887	0.0007898	0.06532	5001	2000		pi.1[34990]	0.4703	0.1867	0.00463	0.05607	0.4914	0.7722	5001	2000
GRMZM2G357804	5	3	317	350		beta.i[7255]	0.0006917	0.03197	0.0007695	-0.06134	0.001206	0.06261	5001	2000		pi.1[7255]	0.6756	0.2434	0.005279	0.0561	0.742	0.9703	5001	2000
GRMZM2G153823	14	67	61	51		beta.i[6307]	0.001115	0.03179	0.0006733	-0.05955	0.0003463	0.06499	5001	2000		pi.1[6307]	0.5999	0.2267	0.004081	0.05613	0.6436	0.911	5001	2000
GRMZM2G053239	23	26	102	182		beta.i[10560]	-0.0003679	0.03196	0.000724	-0.06449	5.825e-05	0.06222	5001	2000		pi.1[10560]	0.5881	0.2213	0.005412	0.05613	0.6327	0.8891	5001	2000
ZLP1	18	34	71	140		beta.i[19931]	0.0009095	0.0318	0.0007735	-0.06262	0.000837	0.05993	5001	2000		pi.1[19931]	0.5884	0.2275	0.004503	0.05613	0.639	0.8978	5001	2000
GRMZM2G017603	23	19	130	155		beta.i[35635]	0.001627	0.03303	0.0005546	-0.06487	0.0007507	0.06811	5001	2000		pi.1[35635]	0.5867	0.2199	0.004265	0.05614	0.6238	0.8919	5001	2000
GRMZM2G112586	204	167	87	28		beta.i[11432]	0.002301	0.03149	0.0007448	-0.05853	0.002974	0.06698	5001	2000		pi.1[11432]	0.4714	0.1884	0.004752	0.05621	0.4921	0.7818	5001	2000
GRMZM5G808737	31	24	79	164		beta.i[34783]	0.0002461	0.03169	0.0006742	-0.06226	0.0001784	0.06264	5001	2000		pi.1[34783]	0.5585	0.2178	0.005589	0.05621	0.5969	0.873	5001	2000
GRMZM2G053042	82	44	85	122		beta.i[4374]	0.001005	0.03231	0.0007239	-0.05998	0.0003981	0.06239	5001	2000		pi.1[4374]	0.5044	0.204	0.004729	0.05625	0.5361	0.8153	5001	2000
GRMZM2G093908	12	19	98	96		beta.i[36531]	-0.0004867	0.03164	0.0007912	-0.06178	-0.0008427	0.06301	5001	2000		pi.1[36531]	0.6077	0.2306	0.005618	0.05625	0.6535	0.9222	5001	2000
GRMZM2G147714	72	41	96	103		beta.i[37166]	0.001519	0.03218	0.0007199	-0.0633	0.001614	0.06625	5001	2000		pi.1[37166]	0.5098	0.2063	0.004916	0.05626	0.5357	0.8301	5001	2000
GRMZM2G057247	181	49	114	164		beta.i[32565]	0.001117	0.0313	0.0006134	-0.05829	0.001226	0.06389	5001	2000		pi.1[32565]	0.4838	0.1904	0.003666	0.05627	0.5062	0.7797	5001	2000
GRMZM2G477314	29	41	66	83		beta.i[8170]	0.001684	0.0325	0.0007329	-0.0599	0.001	0.06612	5001	2000		pi.1[8170]	0.5525	0.2227	0.005268	0.05628	0.591	0.8759	5001	2000
GRMZM2G071076	38	43	84	150		beta.i[10800]	0.001987	0.03168	0.0008473	-0.05909	0.001489	0.06519	5001	2000		pi.1[10800]	0.5594	0.2109	0.003846	0.0563	0.5955	0.8641	5001	2000
GRMZM2G022014	48	73	53	113		beta.i[32184]	0.002422	0.03118	0.0007526	-0.05944	0.003024	0.06437	5001	2000		pi.1[32184]	0.5345	0.2095	0.005368	0.0563	0.5677	0.845	5001	2000
GRMZM2G001718	212	187	65	49		beta.i[3351]	0.001869	0.0318	0.000719	-0.05939	0.001512	0.06453	5001	2000		pi.1[3351]	0.4819	0.1892	0.004638	0.05636	0.5069	0.7827	5001	2000
GRMZM2G376432	43	49	76	103		beta.i[12943]	0.001731	0.03157	0.0006669	-0.06029	0.002193	0.06201	5001	2000		pi.1[12943]	0.5415	0.2143	0.005	0.05636	0.5765	0.8546	5001	2000
GRMZM2G125889	82	42	148	94		beta.i[36909]	0.001739	0.03177	0.0005353	-0.06022	0.002618	0.06512	5001	2000		pi.1[36909]	0.522	0.1992	0.004107	0.05636	0.5478	0.8256	5001	2000
GRMZM2G381576	471	122	85	123		beta.i[26743]	0.0004983	0.03172	0.0008046	-0.06078	3.304e-05	0.06308	5001	2000		pi.1[26743]	0.4582	0.1747	0.003328	0.05645	0.4812	0.7409	5001	2000
GRMZM2G428179	556	77	148	128		beta.i[38112]	0.002079	0.03099	0.0007053	-0.05656	0.002339	0.0641	5001	2000		pi.1[38112]	0.4413	0.1819	0.003803	0.05648	0.4598	0.7424	5001	2000
GRMZM2G479163	37	56	87	113		beta.i[34479]	0.00233	0.0316	0.0006418	-0.05824	0.001968	0.06583	5001	2000		pi.1[34479]	0.5602	0.2096	0.005064	0.05655	0.5961	0.8633	5001	2000
GRMZM2G094558	36	56	82	92		beta.i[36541]	0.0008901	0.03148	0.0006963	-0.06277	0.001584	0.06163	5001	2000		pi.1[36541]	0.5586	0.2121	0.00471	0.05655	0.5952	0.8614	5001	2000
GRMZM2G174830	13	27	61	160		beta.i[1650]	0.0008442	0.03134	0.0006919	-0.05969	0.001605	0.06425	5001	2000		pi.1[1650]	0.6148	0.2311	0.004906	0.05658	0.6662	0.9166	5001	2000
GRMZM2G176903	119	55	155	144		beta.i[17121]	0.0009855	0.03108	0.0007186	-0.05883	0.0001259	0.06164	5001	2000		pi.1[17121]	0.5091	0.1931	0.004145	0.05661	0.5362	0.8048	5001	2000
GRMZM2G407287	31	62	173	45		beta.i[7588]	-0.0001787	0.03207	0.0006767	-0.06054	-0.000331	0.06369	5001	2000		pi.1[7588]	0.5615	0.2136	0.005885	0.05666	0.5951	0.8674	5001	2000
pr5	19	97	46	138		beta.i[7566]	0.0002063	0.0315	0.0007057	-0.06237	0.0009456	0.06157	5001	2000		pi.1[7566]	0.5983	0.217	0.005005	0.05667	0.6371	0.895	5001	2000
GRMZM2G143666	181	69	99	176		beta.i[33423]	0.001763	0.03189	0.0006327	-0.05962	0.001288	0.06487	5001	2000		pi.1[33423]	0.4973	0.1881	0.004597	0.05677	0.5204	0.7881	5001	2000
GRMZM5G820848	72	49	98	240		beta.i[14055]	0.001337	0.03209	0.0006979	-0.06027	0.001388	0.06258	5001	2000		pi.1[14055]	0.5349	0.2055	0.004766	0.0568	0.5723	0.8267	5001	2000
GRMZM2G124509	59	62	67	120		beta.i[29642]	0.00205	0.03119	0.0005614	-0.05978	0.001118	0.06318	5001	2000		pi.1[29642]	0.5329	0.2017	0.004879	0.0568	0.5663	0.8314	5001	2000
GRMZM2G165422	10	27	60	145		beta.i[6534]	0.002509	0.0324	0.0006632	-0.05917	0.002299	0.06687	5001	2000		pi.1[6534]	0.6218	0.2363	0.006074	0.05687	0.6771	0.926	5001	2000
GRMZM2G090156	54	62	112	110		beta.i[20457]	0.001393	0.03115	0.0007306	-0.06054	0.00191	0.06353	5001	2000		pi.1[20457]	0.546	0.2081	0.004795	0.05691	0.5808	0.8406	5001	2000
GRMZM2G049416	28	62	116	63		beta.i[36013]	0.0008098	0.03153	0.0007599	-0.06166	-0.0001008	0.06212	5001	2000		pi.1[36013]	0.565	0.2153	0.006336	0.05693	0.6014	0.8767	5001	2000
GRMZM2G139614	77	19	176	148		beta.i[25711]	0.0004608	0.03134	0.0007465	-0.06053	0.001894	0.06027	5001	2000		pi.1[25711]	0.5041	0.2048	0.004523	0.05695	0.5373	0.8228	5001	2000
GRMZM2G071319	42	47	98	106		beta.i[36264]	0.001652	0.03173	0.0006739	-0.06222	0.001694	0.06264	5001	2000		pi.1[36264]	0.5467	0.2123	0.006027	0.05704	0.5799	0.8585	5001	2000
AC197699.3_FG003	47	48	90	127		beta.i[39157]	0.001102	0.03218	0.0007319	-0.06081	0.001184	0.06321	5001	2000		pi.1[39157]	0.5495	0.2074	0.004585	0.05707	0.5836	0.8572	5001	2000
GRMZM2G341222	145	94	87	176		beta.i[21929]	0.0005168	0.03139	0.0006155	-0.05859	0.0001678	0.06547	5001	2000		pi.1[21929]	0.5049	0.1909	0.004347	0.05711	0.5291	0.8026	5001	2000
GRMZM2G388585	86	24	99	426		beta.i[13008]	0.00254	0.03215	0.0007298	-0.05938	0.001759	0.06555	5001	2000		pi.1[13008]	0.5279	0.197	0.004384	0.05721	0.5579	0.8305	5001	2000
GRMZM2G442055	41	36	201	69		beta.i[13334]	0.00136	0.03197	0.0005951	-0.06027	0.000152	0.06776	5001	2000		pi.1[13334]	0.5423	0.2106	0.005555	0.05721	0.5726	0.8498	5001	2000
GRMZM2G377609	26	28	75	201		beta.i[17642]	0.0005851	0.0314	0.0007177	-0.06126	0.0003965	0.06092	5001	2000		pi.1[17642]	0.5729	0.2141	0.005076	0.05726	0.6133	0.8774	5001	2000
AC155434.2_FG001	3	6	86	197		beta.i[31759]	0.001656	0.03205	0.0007315	-0.0579	0.001768	0.06715	5001	2000		pi.1[31759]	0.7158	0.2528	0.006936	0.05732	0.7885	0.9885	5001	2000
GRMZM2G177511	93	35	133	132		beta.i[12388]	0.002249	0.03262	0.0007439	-0.05899	0.002184	0.06885	5001	2000		pi.1[12388]	0.5162	0.1996	0.00406	0.05736	0.5366	0.8323	5001	2000
AC215260.3_FG001	14	13	100	402		beta.i[14781]	0.002312	0.03171	0.000829	-0.05913	0.001718	0.06596	5001	2000		pi.1[14781]	0.623	0.2221	0.004983	0.05738	0.6738	0.912	5001	2000
GRMZM2G136366	103	39	119	248		beta.i[5979]	0.001427	0.03218	0.0007071	-0.06136	0.00135	0.06328	5001	2000		pi.1[5979]	0.515	0.1972	0.004509	0.05741	0.5396	0.8199	5001	2000
GRMZM2G459831	236	69	62	83		beta.i[8024]	0.0003649	0.03121	0.0007163	-0.05854	5.856e-05	0.06255	5001	2000		pi.1[8024]	0.4589	0.1886	0.003304	0.05743	0.4768	0.7641	5001	2000
GRMZM2G459824	328	116	62	91		beta.i[8023]	0.001661	0.03138	0.0006486	-0.06191	0.00255	0.06285	5001	2000		pi.1[8023]	0.4563	0.184	0.005269	0.05746	0.4795	0.7559	5001	2000
GRMZM2G059110	113	17	208	184		beta.i[706]	0.00179	0.03168	0.0006846	-0.06173	0.001663	0.0663	5001	2000		pi.1[706]	0.4918	0.1963	0.004702	0.05748	0.5097	0.8061	5001	2000
GRMZM2G331085	9	9	128	131		beta.i[30425]	0.0008297	0.03269	0.0006603	-0.06154	0.001304	0.06933	5001	2000		pi.1[30425]	0.6238	0.2338	0.005095	0.05748	0.6748	0.9305	5001	2000
GRMZM2G168119	111	59	94	55		beta.i[30141]	0.001293	0.03189	0.00061	-0.06318	0.002207	0.0629	5001	2000		pi.1[30141]	0.4919	0.1985	0.003304	0.05749	0.5125	0.8166	5001	2000
GRMZM2G528602	127	55	122	132		beta.i[8358]	0.0002481	0.03088	0.0008791	-0.05982	0.0001947	0.06019	5001	2000		pi.1[8358]	0.5016	0.1901	0.00375	0.05753	0.5217	0.8023	5001	2000
GRMZM2G123996	47	8	447	297		beta.i[20925]	0.0002191	0.03141	0.0006426	-0.0617	0.0003695	0.05962	5001	2000		pi.1[20925]	0.5413	0.2094	0.005053	0.05753	0.5765	0.8509	5001	2000
GRMZM2G167364	19	33	97	98		beta.i[30129]	0.0009764	0.03153	0.0006918	-0.06029	0.0016	0.06304	5001	2000		pi.1[30129]	0.5777	0.2235	0.004866	0.05766	0.6168	0.8931	5001	2000
GRMZM2G124563	18	19	118	145		beta.i[25472]	0.001236	0.03183	0.0006176	-0.06277	0.002027	0.06152	5001	2000		pi.1[25472]	0.5882	0.2223	0.004966	0.05767	0.6263	0.8994	5001	2000
GRMZM2G154641	18	13	101	333		beta.i[16846]	0.001446	0.03173	0.0006828	-0.06072	0.001431	0.06203	5001	2000		pi.1[16846]	0.6031	0.2154	0.004784	0.05774	0.6432	0.8929	5001	2000
GRMZM5G838727	23	12	173	207		beta.i[38823]	0.0002273	0.03199	0.0006179	-0.06066	0.0006872	0.06513	5001	2000		pi.1[38823]	0.5732	0.2239	0.004489	0.05774	0.6165	0.8897	5001	2000
GRMZM2G144581	72	28	181	178		beta.i[25781]	0.002295	0.03168	0.0006723	-0.05993	0.002421	0.06477	5001	2000		pi.1[25781]	0.5296	0.1977	0.004129	0.0578	0.5584	0.8315	5001	2000
GRMZM5G879278	24	46	54	131		beta.i[14411]	0.001655	0.03184	0.0007315	-0.06166	0.001851	0.06431	5001	2000		pi.1[14411]	0.5678	0.2184	0.005387	0.05781	0.6064	0.8744	5001	2000
GRMZM2G169929	5	4	279	426		beta.i[17051]	0.0001098	0.03121	0.0008967	-0.06372	0.0004441	0.05845	5001	2000		pi.1[17051]	0.6846	0.2382	0.00607	0.05783	0.7419	0.968	5001	2000
GRMZM2G044512	51	63	89	193		beta.i[28841]	0.00148	0.03116	0.0007112	-0.05927	0.00118	0.06302	5001	2000		pi.1[28841]	0.5513	0.2032	0.00488	0.05783	0.5861	0.8464	5001	2000
GRMZM2G030433	27	57	67	150		beta.i[3915]	0.001261	0.03132	0.0006116	-0.0596	0.001602	0.06436	5001	2000		pi.1[3915]	0.5829	0.2095	0.00502	0.05792	0.6217	0.8813	5001	2000
GRMZM2G070259	59	93	65	45		beta.i[4696]	0.002523	0.03197	0.0006525	-0.05935	0.00165	0.06554	5001	2000		pi.1[4696]	0.5168	0.2105	0.005068	0.05795	0.5471	0.8393	5001	2000
GRMZM2G031986	20	24	107	99		beta.i[15237]	0.0002831	0.03083	0.0007222	-0.06104	0.0004568	0.059	5001	2000		pi.1[15237]	0.5833	0.2266	0.005187	0.05796	0.6263	0.8915	5001	2000
GRMZM2G082131	32	52	109	30		beta.i[32816]	0.001389	0.0318	0.000782	-0.06146	0.001735	0.06422	5001	2000		pi.1[32816]	0.5427	0.2213	0.005001	0.058	0.5731	0.8705	5001	2000
GRMZM2G156748	3	2	63	810		beta.i[25933]	0.000866	0.03195	0.00093	-0.06257	0.0006325	0.06365	5001	2000		pi.1[25933]	0.7107	0.2628	0.006257	0.05802	0.7901	0.9907	5001	2000
GRMZM5G846152	62	150	43	48		beta.i[18739]	0.001002	0.03211	0.0008396	-0.06111	0.0008847	0.06891	5001	2000		pi.1[18739]	0.5168	0.2045	0.004094	0.05811	0.5476	0.8332	5001	2000
GRMZM2G315127	90	66	89	148		beta.i[26395]	0.002254	0.0319	0.0006134	-0.05907	0.002074	0.0658	5001	2000		pi.1[26395]	0.5254	0.2002	0.004355	0.05811	0.5502	0.8217	5001	2000
GRMZM2G053485	56	59	110	64		beta.i[24416]	0.0008653	0.03106	0.000744	-0.06111	0.0001841	0.06145	5001	2000		pi.1[24416]	0.5288	0.2091	0.00387	0.05813	0.5543	0.8394	5001	2000
H4C13	359	82	131	151		beta.i[15036]	0.001717	0.03149	0.000744	-0.05899	0.002386	0.06208	5001	2000		pi.1[15036]	0.4721	0.1808	0.003577	0.05822	0.5006	0.7561	5001	2000
GRMZM2G038165	28	28	86	147		beta.i[4054]	0.002293	0.03218	0.0007155	-0.05973	0.002129	0.06657	5001	2000		pi.1[4054]	0.5627	0.2145	0.004803	0.05824	0.5934	0.87	5001	2000
OPR7	338	45	216	268		beta.i[6196]	0.001078	0.03201	0.0007113	-0.0631	0.001996	0.06384	5001	2000		pi.1[6196]	0.4764	0.1837	0.003386	0.05825	0.5019	0.7675	5001	2000
GRMZM2G175563	7	6	193	249		beta.i[40970]	0.001594	0.03192	0.000801	-0.05883	0.001158	0.06494	5001	2000		pi.1[40970]	0.6447	0.2399	0.006511	0.05828	0.7014	0.9518	5001	2000
GRMZM2G024231	62	50	130	155		beta.i[3804]	0.001487	0.03152	0.0007296	-0.05841	0.00118	0.06298	5001	2000		pi.1[3804]	0.544	0.2039	0.004769	0.0583	0.5709	0.8401	5001	2000
GRMZM2G305994	164	146	58	88		beta.i[1764]	0.001053	0.03179	0.0008009	-0.06106	0.001776	0.06233	5001	2000		pi.1[1764]	0.4858	0.1959	0.004186	0.05831	0.5057	0.7915	5001	2000
GRMZM2G052926	23	40	62	129		beta.i[36059]	0.0009256	0.03171	0.0008228	-0.05953	0.0009087	0.06776	5001	2000		pi.1[36059]	0.5812	0.2229	0.005404	0.05834	0.6197	0.8864	5001	2000
GRMZM2G000116	40	58	88	79		beta.i[28419]	0.001661	0.03209	0.0006465	-0.06364	0.001965	0.0646	5001	2000		pi.1[28419]	0.5492	0.211	0.005312	0.05835	0.5837	0.8539	5001	2000
GRMZM2G159221	52	44	109	178		beta.i[33552]	0.002308	0.03162	0.000732	-0.05876	0.001997	0.06544	5001	2000		pi.1[33552]	0.553	0.2094	0.005491	0.05837	0.5871	0.8542	5001	2000
GRMZM2G110932	34	48	72	171		beta.i[1120]	0.0009932	0.03159	0.0006528	-0.0604	0.0004334	0.06302	5001	2000		pi.1[1120]	0.574	0.2133	0.004933	0.0584	0.615	0.8701	5001	2000
GRMZM2G106445	758	84	383	95		beta.i[11347]	0.00299	0.03234	0.0008997	-0.06062	0.003218	0.06668	5001	2000		pi.1[11347]	0.4456	0.1723	0.003888	0.05845	0.4614	0.7303	5001	2000
GRMZM2G100246	127	59	95	93		beta.i[25079]	0.001062	0.03177	0.0008119	-0.06057	0.002045	0.06357	5001	2000		pi.1[25079]	0.4894	0.1912	0.004466	0.05845	0.5163	0.7849	5001	2000
GRMZM2G034342	41	52	75	92		beta.i[35851]	0.001415	0.03113	0.0007864	-0.05967	0.0007841	0.06129	5001	2000		pi.1[35851]	0.5445	0.2092	0.004961	0.05861	0.5746	0.8565	5001	2000
GRMZM2G113775	26	41	68	115		beta.i[5550]	0.00133	0.03212	0.0006676	-0.06371	0.00104	0.06699	5001	2000		pi.1[5550]	0.5713	0.2193	0.005143	0.05869	0.6051	0.8843	5001	2000
GRMZM2G081719	26	46	69	112		beta.i[15956]	0.0009999	0.03154	0.0007427	-0.06001	0.001791	0.06106	5001	2000		pi.1[15956]	0.5746	0.2165	0.004955	0.05875	0.6115	0.8809	5001	2000
GRMZM2G468479	76	120	58	54		beta.i[18102]	0.0007419	0.03297	0.0007441	-0.06414	0.0005569	0.06788	5001	2000		pi.1[18102]	0.5164	0.2063	0.004383	0.05876	0.5431	0.8308	5001	2000
GRMZM2G704005	25	15	159	127		beta.i[8613]	0.002738	0.03132	0.0007049	-0.05914	0.002659	0.06481	5001	2000		pi.1[8613]	0.5591	0.2216	0.005701	0.05886	0.6	0.8821	5001	2000
GRMZM2G094723	54	34	92	130		beta.i[20519]	0.001271	0.03259	0.0007089	-0.06051	0.0006423	0.06637	5001	2000		pi.1[20519]	0.5293	0.2048	0.003971	0.05886	0.5594	0.8383	5001	2000
GRMZM2G302323	5	15	81	106		beta.i[21723]	-1.449e-05	0.03159	0.0007472	-0.06079	-0.0002773	0.06092	5001	2000		pi.1[21723]	0.6748	0.2412	0.005193	0.05892	0.7324	0.971	5001	2000
GRMZM2G480106	7	63	87	24		beta.i[41740]	0.001181	0.03198	0.00074	-0.06102	0.001353	0.06571	5001	2000		pi.1[41740]	0.6237	0.2397	0.005222	0.05892	0.6741	0.9431	5001	2000
GRMZM2G106690	33	190	54	30		beta.i[36689]	0.001001	0.03225	0.0006769	-0.06165	0.001227	0.06582	5001	2000		pi.1[36689]	0.541	0.2124	0.005088	0.05894	0.5664	0.862	5001	2000
GRMZM2G006763	26	21	132	151		beta.i[14924]	0.001557	0.03242	0.0007804	-0.0602	0.001718	0.06382	5001	2000		pi.1[14924]	0.5694	0.2198	0.004707	0.05897	0.6108	0.8718	5001	2000
GRMZM2G307906	67	54	141	83		beta.i[41067]	0.000963	0.03204	0.0007893	-0.06233	9.523e-05	0.06553	5001	2000		pi.1[41067]	0.5323	0.2001	0.0045	0.05897	0.5653	0.8257	5001	2000
GRMZM2G014419	63	42	78	118		beta.i[3617]	0.001012	0.03177	0.0006095	-0.06094	0.0002846	0.06225	5001	2000		pi.1[3617]	0.5261	0.2039	0.004916	0.05901	0.5579	0.8354	5001	2000
GRMZM2G398854	5	10	235	85		beta.i[30714]	0.0007745	0.03122	0.0006964	-0.06349	0.001712	0.06177	5001	2000		pi.1[30714]	0.6616	0.2517	0.006101	0.05904	0.7173	0.962	5001	2000
GRMZM2G040682	43	59	91	153		beta.i[566]	0.0009294	0.031	0.0008598	-0.06106	0.001152	0.06058	5001	2000		pi.1[566]	0.556	0.208	0.004109	0.05905	0.5873	0.8558	5001	2000
GRMZM2G087961	8	3	475	403		beta.i[16054]	0.001085	0.03184	0.0006659	-0.06121	0.001093	0.06266	5001	2000		pi.1[16054]	0.6367	0.2297	0.004314	0.05909	0.6786	0.9393	5001	2000
GRMZM2G503185	678	271	50	64		beta.i[38396]	0.0005934	0.03104	0.0008838	-0.05807	0.0003982	0.06094	5001	2000		pi.1[38396]	0.436	0.1743	0.003661	0.0591	0.4522	0.7301	5001	2000
GRMZM2G174917	19	62	55	176		beta.i[12334]	0.001776	0.03212	0.0007337	-0.06172	0.001307	0.06737	5001	2000		pi.1[12334]	0.6025	0.2191	0.005651	0.05915	0.6443	0.9007	5001	2000
DWF1	19	37	95	66		beta.i[24468]	0.001507	0.0317	0.0007064	-0.06094	0.001541	0.06465	5001	2000		pi.1[24468]	0.5802	0.2243	0.005036	0.05916	0.6181	0.8906	5001	2000
GRMZM2G553607	16	31	68	189		beta.i[13799]	0.002787	0.03165	0.0008534	-0.0602	0.002975	0.06559	5001	2000		pi.1[13799]	0.6094	0.2212	0.005686	0.05919	0.6498	0.9016	5001	2000
GRMZM2G050089	41	38	118	109		beta.i[15495]	0.001983	0.03134	0.0008188	-0.06187	0.002832	0.06313	5001	2000		pi.1[15495]	0.5477	0.2091	0.00472	0.05919	0.5775	0.8593	5001	2000
GRMZM2G099754	188	30	182	293		beta.i[20582]	0.0009798	0.03224	0.0007795	-0.06229	0.0008913	0.0662	5001	2000		pi.1[20582]	0.4979	0.1861	0.003731	0.05921	0.5205	0.7889	5001	2000
GRMZM2G139952	23	78	87	51		beta.i[37088]	0.001095	0.03238	0.0007427	-0.06244	0.00161	0.0654	5001	2000		pi.1[37088]	0.5816	0.2179	0.005607	0.05922	0.6243	0.8813	5001	2000
GRMZM2G000718	21	39	80	77		beta.i[31971]	0.001666	0.03197	0.0007114	-0.0621	0.002164	0.06349	5001	2000		pi.1[31971]	0.5775	0.2169	0.004785	0.0593	0.6209	0.8887	5001	2000
GRMZM2G320135	32	41	138	74		beta.i[1813]	-0.000419	0.03165	0.000636	-0.06086	-0.0009309	0.06653	5001	2000		pi.1[1813]	0.5622	0.2102	0.003921	0.05933	0.5988	0.8676	5001	2000
GRMZM2G461139	39	49	77	88		beta.i[18063]	0.001701	0.03191	0.000824	-0.06294	0.002025	0.06703	5001	2000		pi.1[18063]	0.5423	0.2095	0.004695	0.05933	0.5727	0.8555	5001	2000
GRMZM2G155387	39	144	61	56		beta.i[1506]	0.001425	0.03165	0.0007467	-0.06143	0.00191	0.06256	5001	2000		pi.1[1506]	0.5473	0.2087	0.00526	0.05934	0.5785	0.8663	5001	2000
GRMZM2G103805	21	17	144	138		beta.i[40278]	0.003167	0.03209	0.0006727	-0.05974	0.003178	0.06628	5001	2000		pi.1[40278]	0.5849	0.2172	0.005277	0.05934	0.6218	0.8848	5001	2000
GRMZM2G045431	17	103	80	43		beta.i[32424]	0.001782	0.03251	0.000738	-0.06139	0.00285	0.06419	5001	2000		pi.1[32424]	0.59	0.2222	0.00565	0.05937	0.6259	0.9032	5001	2000
GRMZM2G000790	353	79	145	125		beta.i[197]	0.002622	0.03236	0.0006968	-0.0614	0.00215	0.06421	5001	2000		pi.1[197]	0.4661	0.1781	0.004181	0.05944	0.4876	0.7585	5001	2000
GRMZM2G096363	15	60	48	61		beta.i[29351]	0.001372	0.0316	0.0006795	-0.05953	0.001801	0.06487	5001	2000		pi.1[29351]	0.5885	0.2206	0.004388	0.05944	0.6258	0.9017	5001	2000
GRMZM2G462690	14	45	72	117		beta.i[13481]	-0.0001876	0.03144	0.0006417	-0.06191	5.889e-05	0.06068	5001	2000		pi.1[13481]	0.612	0.2225	0.00578	0.05946	0.6501	0.9183	5001	2000
GRMZM2G170646	7	8	163	179		beta.i[30172]	0.001584	0.03164	0.0007219	-0.06014	0.003178	0.06234	5001	2000		pi.1[30172]	0.649	0.2402	0.005075	0.05946	0.7044	0.9481	5001	2000
GRMZM2G347280	53	30	98	209		beta.i[7169]	0.00231	0.03147	0.0006817	-0.05932	0.002616	0.06457	5001	2000		pi.1[7169]	0.5392	0.2069	0.004923	0.05949	0.5736	0.8522	5001	2000
AC206840.3_FG002	50	53	99	112		beta.i[3137]	0.0005292	0.03172	0.0008053	-0.06255	0.000224	0.06244	5001	2000		pi.1[3137]	0.543	0.2049	0.004415	0.0595	0.5733	0.8451	5001	2000
GRMZM2G050693	56	34	105	107		beta.i[36034]	0.001932	0.03183	0.0006259	-0.05939	0.001529	0.06331	5001	2000		pi.1[36034]	0.5292	0.2098	0.003579	0.0595	0.562	0.8438	5001	2000
GRMZM2G040876	24	43	80	82		beta.i[569]	0.001492	0.03212	0.0006547	-0.05782	0.001503	0.06615	5001	2000		pi.1[569]	0.5692	0.2158	0.005657	0.05964	0.6025	0.8841	5001	2000
GRMZM2G026180	153	48	84	174		beta.i[24072]	0.002445	0.03185	0.0008262	-0.06154	0.00254	0.06235	5001	2000		pi.1[24072]	0.4929	0.1872	0.004126	0.05965	0.5171	0.7813	5001	2000
GRMZM2G138943	17	50	85	72		beta.i[33369]	0.001285	0.03238	0.0006765	-0.06355	0.002066	0.06335	5001	2000		pi.1[33369]	0.5879	0.2251	0.005481	0.05974	0.627	0.8975	5001	2000
GRMZM2G148461	4	14	118	96		beta.i[29929]	0.001639	0.0311	0.0005129	-0.06079	0.001764	0.06256	5001	2000		pi.1[29929]	0.6829	0.2496	0.004113	0.05976	0.7495	0.9806	5001	2000
GRMZM2G103315	33	60	76	95		beta.i[20629]	0.0002472	0.0315	0.0006142	-0.06344	-0.0002651	0.0631	5001	2000		pi.1[20629]	0.5567	0.2112	0.004944	0.0598	0.5954	0.8667	5001	2000
GRMZM2G124573	47	98	62	65		beta.i[25473]	0.001265	0.0315	0.0008676	-0.06101	0.0008795	0.06252	5001	2000		pi.1[25473]	0.5399	0.2063	0.004304	0.05985	0.5737	0.8418	5001	2000
GRMZM2G391626	14	24	77	109		beta.i[26809]	0.00137	0.03145	0.0006734	-0.05918	0.001823	0.06491	5001	2000		pi.1[26809]	0.6044	0.2278	0.005275	0.05985	0.65	0.9082	5001	2000
GRMZM2G703918	9	15	88	139		beta.i[8608]	0.0018	0.03275	0.0007217	-0.0614	0.001568	0.06743	5001	2000		pi.1[8608]	0.6237	0.242	0.005845	0.05987	0.6729	0.9377	5001	2000
GRMZM2G396231	11	29	119	52		beta.i[17732]	0.0004328	0.03258	0.0007804	-0.06047	-0.0008745	0.06604	5001	2000		pi.1[17732]	0.6066	0.2343	0.005418	0.05989	0.6511	0.9207	5001	2000
GRMZM5G886952	17	33	50	235		beta.i[9288]	0.001285	0.03238	0.0007347	-0.06223	0.0005601	0.06518	5001	2000		pi.1[9288]	0.5977	0.2243	0.004968	0.05992	0.6423	0.8992	5001	2000
GRMZM2G305822	2	12	73	167		beta.i[41060]	0.0004884	0.03179	0.0006498	-0.06183	0.0007138	0.06433	5001	2000		pi.1[41060]	0.7275	0.2557	0.005539	0.05995	0.8096	0.9918	5001	2000
GRMZM2G031607	81	121	48	67		beta.i[35810]	0.002999	0.03214	0.0006991	-0.05985	0.004049	0.06474	5001	2000		pi.1[35810]	0.5086	0.2021	0.005279	0.05998	0.5345	0.8276	5001	2000
GRMZM5G833593	31	58	62	70		beta.i[18664]	0.001595	0.03205	0.0007115	-0.05838	0.0008864	0.06561	5001	2000		pi.1[18664]	0.5494	0.2125	0.004508	0.06001	0.5763	0.8551	5001	2000
GRMZM2G013801	65	32	138	116		beta.i[28550]	0.001129	0.0315	0.0007315	-0.06131	0.00147	0.06092	5001	2000		pi.1[28550]	0.5205	0.2035	0.004758	0.06001	0.5453	0.826	5001	2000
GRMZM2G089193	38	43	99	116		beta.i[32877]	0.001049	0.03211	0.0006722	-0.0612	0.0005555	0.06409	5001	2000		pi.1[32877]	0.5516	0.2146	0.004113	0.06003	0.5862	0.8675	5001	2000
GRMZM2G048117	72	69	105	166		beta.i[36002]	0.001225	0.03204	0.0007229	-0.0624	0.00117	0.06259	5001	2000		pi.1[36002]	0.5401	0.1974	0.003133	0.06003	0.5694	0.8383	5001	2000
GRMZM2G328578	23	34	127	94		beta.i[41149]	-7.011e-05	0.03166	0.0006597	-0.06298	0.0002067	0.06249	5001	2000		pi.1[41149]	0.5804	0.2182	0.005738	0.06003	0.6182	0.8897	5001	2000
GRMZM5G866345	154	51	268	47		beta.i[2792]	0.0002193	0.03125	0.0007897	-0.05988	0.0005987	0.06447	5001	2000		pi.1[2792]	0.48	0.1871	0.004082	0.06009	0.5003	0.7831	5001	2000
GRMZM2G074466	21	98	58	77		beta.i[15859]	0.002422	0.03071	0.0006889	-0.05823	0.002182	0.06441	5001	2000		pi.1[15859]	0.5791	0.2185	0.00527	0.0601	0.621	0.884	5001	2000
GRMZM2G165993	42	97	92	45		beta.i[6547]	0.0005629	0.03123	0.0006956	-0.05925	0.000399	0.06353	5001	2000		pi.1[6547]	0.5457	0.2079	0.004503	0.06013	0.5785	0.8559	5001	2000
GRMZM2G367638	596	42	236	251		beta.i[41296]	0.001562	0.03208	0.0008116	-0.06095	0.0004514	0.06495	5001	2000		pi.1[41296]	0.4463	0.1742	0.004454	0.06016	0.4679	0.7322	5001	2000
GRMZM2G002678	37	33	108	70		beta.i[14866]	0.0003279	0.03127	0.0007176	-0.06045	0.0003489	0.0631	5001	2000		pi.1[14866]	0.5445	0.214	0.004682	0.06019	0.5776	0.8541	5001	2000
AC217358.3_FG005	76	15	141	416		beta.i[3265]	0.00203	0.0316	0.0007434	-0.06086	0.001194	0.06393	5001	2000		pi.1[3265]	0.5271	0.1989	0.0043	0.06022	0.5573	0.8238	5001	2000
GRMZM2G142660	22	43	65	92		beta.i[6095]	0.001079	0.03154	0.0007703	-0.06143	0.001287	0.0635	5001	2000		pi.1[6095]	0.5766	0.2204	0.004393	0.06028	0.6154	0.8904	5001	2000
GRMZM2G058032	81	18	123	828		beta.i[4466]	0.00172	0.03101	0.0008097	-0.05882	0.001152	0.0637	5001	2000		pi.1[4466]	0.5278	0.2023	0.004539	0.06032	0.5609	0.8264	5001	2000
GRMZM2G405368	17	20	73	94		beta.i[41449]	0.001442	0.03201	0.0007808	-0.05901	0.0004337	0.06284	5001	2000		pi.1[41449]	0.5771	0.2322	0.004842	0.06041	0.6214	0.904	5001	2000
GRMZM2G132886	488	76	83	245		beta.i[16577]	0.001482	0.03187	0.0006799	-0.06048	0.001299	0.06202	5001	2000		pi.1[16577]	0.4533	0.1795	0.00472	0.06044	0.4656	0.7481	5001	2000
GRMZM2G086132	77	65	73	145		beta.i[29244]	0.00253	0.03184	0.000572	-0.06149	0.00253	0.0634	5001	2000		pi.1[29244]	0.5284	0.1991	0.004997	0.06047	0.5551	0.837	5001	2000
GRMZM2G053711	97	58	103	142		beta.i[19965]	0.002109	0.0314	0.0008833	-0.05999	0.002531	0.06007	5001	2000		pi.1[19965]	0.5106	0.2007	0.004136	0.06049	0.5444	0.8137	5001	2000
GRMZM2G181453	30	56	116	63		beta.i[1735]	0.001608	0.03228	0.0006772	-0.0621	0.0007264	0.065	5001	2000		pi.1[1735]	0.5682	0.2118	0.003942	0.0605	0.604	0.8769	5001	2000
GRMZM2G083068	53	43	104	119		beta.i[36407]	0.002245	0.03135	0.0007124	-0.05662	0.001162	0.06447	5001	2000		pi.1[36407]	0.5381	0.2086	0.004565	0.06052	0.5686	0.8432	5001	2000
GRMZM2G154463	11	14	132	141		beta.i[37244]	0.00135	0.03177	0.0006887	-0.06105	0.0009614	0.06228	5001	2000		pi.1[37244]	0.6198	0.2297	0.005614	0.06052	0.6731	0.9238	5001	2000
GRMZM2G432774	3	2	227	345		beta.i[34307]	9.087e-05	0.03178	0.0007539	-0.06097	0.001413	0.06011	5001	2000		pi.1[34307]	0.7069	0.2579	0.006686	0.06053	0.7817	0.9884	5001	2000
GRMZM2G374044	26	74	70	69		beta.i[17628]	0.001596	0.03089	0.0006747	-0.05969	0.001512	0.06293	5001	2000		pi.1[17628]	0.5654	0.2149	0.00529	0.06055	0.5986	0.8741	5001	2000
GRMZM2G132403	9	20	97	113		beta.i[21046]	0.001203	0.03231	0.0007714	-0.06273	0.00198	0.06289	5001	2000		pi.1[21046]	0.6263	0.2377	0.00403	0.06055	0.677	0.9313	5001	2000
GRMZM2G146028	31	75	75	130		beta.i[21225]	0.001422	0.03181	0.0005648	-0.05919	0.001622	0.06414	5001	2000		pi.1[21225]	0.572	0.205	0.004549	0.06055	0.6122	0.8632	5001	2000
GRMZM2G311164	72	70	51	109		beta.i[12521]	0.001779	0.03171	0.0006171	-0.06043	0.001605	0.06428	5001	2000		pi.1[12521]	0.5148	0.2068	0.004845	0.06061	0.5419	0.8345	5001	2000
GRMZM2G005419	50	50	108	134		beta.i[14905]	0.0006112	0.03139	0.0006745	-0.0629	0.002394	0.06181	5001	2000		pi.1[14905]	0.5478	0.2059	0.005111	0.06063	0.5794	0.8553	5001	2000
GRMZM2G025480	91	69	79	153		beta.i[39527]	0.001585	0.03148	0.000712	-0.06013	0.001222	0.06123	5001	2000		pi.1[39527]	0.523	0.1986	0.005198	0.06066	0.5537	0.8283	5001	2000
GRMZM2G351382	39	54	96	114		beta.i[21976]	0.001887	0.03114	0.000806	-0.05982	0.001317	0.06388	5001	2000		pi.1[21976]	0.56	0.2052	0.00541	0.06068	0.5948	0.8561	5001	2000
GRMZM2G019991	48	32	97	173		beta.i[3727]	0.0001334	0.03112	0.000683	-0.06036	0.0006506	0.06071	5001	2000		pi.1[3727]	0.5489	0.2059	0.004641	0.0607	0.5792	0.8551	5001	2000
GRMZM2G040481	11	31	117	59		beta.i[24257]	-0.0009113	0.03112	0.0006292	-0.06182	-0.0004417	0.05932	5001	2000		pi.1[24257]	0.6097	0.2319	0.005547	0.06071	0.6621	0.9274	5001	2000
GRMZM2G107867	60	36	113	170		beta.i[5418]	0.0006187	0.03165	0.0007188	-0.0611	-0.000347	0.06601	5001	2000		pi.1[5418]	0.5412	0.2046	0.004877	0.06072	0.5781	0.8442	5001	2000
GRMZM2G158279	27	23	105	211		beta.i[12088]	0.0002193	0.03126	0.0007774	-0.06018	0.0001684	0.06192	5001	2000		pi.1[12088]	0.5788	0.216	0.006437	0.06081	0.6155	0.8815	5001	2000
GRMZM2G165179	18	81	45	133		beta.i[21485]	0.001795	0.03168	0.0006606	-0.06171	0.001054	0.06393	5001	2000		pi.1[21485]	0.5881	0.2235	0.004927	0.06095	0.6305	0.892	5001	2000
GRMZM2G008095	23	41	78	77		beta.i[9828]	-0.0002798	0.03065	0.000605	-0.0589	-0.0006815	0.06129	5001	2000		pi.1[9828]	0.5711	0.2154	0.004685	0.06096	0.6076	0.8775	5001	2000
GRMZM2G075826	492	570	28	73		beta.i[32744]	0.000969	0.0313	0.0008823	-0.06048	0.0009843	0.06218	5001	2000		pi.1[32744]	0.4531	0.1801	0.003804	0.06097	0.4803	0.7451	5001	2000
GRMZM5G844096	60	45	114	141		beta.i[23148]	2.998e-05	0.0316	0.0006548	-0.06336	-1.434e-06	0.06062	5001	2000		pi.1[23148]	0.5364	0.2044	0.004903	0.06098	0.5654	0.8429	5001	2000
GRMZM2G479746	121	39	152	157		beta.i[31051]	0.002525	0.03092	0.0007336	-0.05723	0.002006	0.06507	5001	2000		pi.1[31051]	0.5047	0.1959	0.004469	0.06098	0.5326	0.8044	5001	2000
GRMZM2G318183	2	3	113	386		beta.i[30367]	0.001448	0.03215	0.0007715	-0.06046	0.001646	0.06838	5001	2000		pi.1[30367]	0.736	0.2525	0.007254	0.06119	0.8101	0.992	5001	2000
GRMZM2G309660	22	35	109	136		beta.i[17239]	0.0006525	0.03196	0.0005598	-0.06228	0.0007215	0.06412	5001	2000		pi.1[17239]	0.5925	0.2163	0.004399	0.06122	0.6276	0.8933	5001	2000
GRMZM2G003076	50	61	65	119		beta.i[3381]	0.002216	0.03238	0.0008943	-0.06205	0.003056	0.0661	5001	2000		pi.1[3381]	0.5375	0.2097	0.004356	0.06139	0.5678	0.8462	5001	2000
GRMZM2G061184	14	42	75	83		beta.i[10661]	0.001206	0.03165	0.000735	-0.0608	0.001563	0.06147	5001	2000		pi.1[10661]	0.6067	0.2239	0.005726	0.06143	0.6478	0.9071	5001	2000
GRMZM2G092648	44	64	108	91		beta.i[11146]	0.001163	0.03191	0.0007012	-0.06274	0.001598	0.06256	5001	2000		pi.1[11146]	0.545	0.2061	0.004856	0.06144	0.5766	0.8507	5001	2000
GRMZM2G076279	43	39	65	87		beta.i[10881]	0.0003526	0.03185	0.0008053	-0.06199	0.0001276	0.06165	5001	2000		pi.1[10881]	0.5275	0.216	0.004337	0.06145	0.5629	0.8538	5001	2000
GRMZM2G156476	36	57	61	82		beta.i[25928]	0.001015	0.0308	0.0007498	-0.05878	0.001145	0.06064	5001	2000		pi.1[25928]	0.5502	0.2123	0.005071	0.06146	0.5872	0.8579	5001	2000
GRMZM2G151407	12	34	70	187		beta.i[33494]	0.0001703	0.03089	0.0007715	-0.06014	0.0005596	0.06179	5001	2000		pi.1[33494]	0.6194	0.2273	0.005487	0.06149	0.6674	0.9194	5001	2000
GRMZM5G835747	54	41	132	101		beta.i[23111]	0.001737	0.03173	0.000729	-0.05979	0.001975	0.06251	5001	2000		pi.1[23111]	0.5431	0.2038	0.004673	0.0615	0.5815	0.8439	5001	2000
GRMZM2G108892	174	71	126	158		beta.i[1102]	0.00205	0.03192	0.0006778	-0.06015	0.002115	0.06582	5001	2000		pi.1[1102]	0.5022	0.1892	0.004489	0.06157	0.528	0.7826	5001	2000
GRMZM2G163843	55	43	140	79		beta.i[37352]	0.001437	0.03147	0.0007961	-0.05962	0.002449	0.06046	5001	2000		pi.1[37352]	0.5309	0.2005	0.004251	0.06164	0.5577	0.8372	5001	2000
GRMZM2G314924	70	26	241	160		beta.i[17276]	0.001206	0.03228	0.0008013	-0.06166	0.001208	0.06489	5001	2000		pi.1[17276]	0.5301	0.2008	0.004104	0.06167	0.5603	0.8348	5001	2000
GRMZM2G001048	42	40	148	65		beta.i[19287]	0.002183	0.0315	0.0006745	-0.05921	0.002964	0.06373	5001	2000		pi.1[19287]	0.5445	0.2086	0.004597	0.06167	0.5734	0.854	5001	2000
GRMZM2G478140	7	15	49	325		beta.i[27285]	0.0006874	0.03076	0.0007751	-0.05889	0.0006132	0.06095	5001	2000		pi.1[27285]	0.658	0.2401	0.005272	0.06168	0.7118	0.9513	5001	2000
AC182482.3_FG003	142	12	455	516		beta.i[14555]	0.003528	0.0315	0.0007983	-0.05891	0.00372	0.06382	5001	2000		pi.1[14555]	0.5019	0.1926	0.004523	0.06173	0.526	0.8037	5001	2000
GRMZM2G155949	93	56	78	120		beta.i[1517]	0.0008966	0.03087	0.0008035	-0.0582	0.0005851	0.06427	5001	2000		pi.1[1517]	0.5154	0.2001	0.004547	0.06176	0.5437	0.8191	5001	2000
GRMZM2G096051	51	47	110	71		beta.i[29349]	0.001215	0.03192	0.0007862	-0.06349	0.0009033	0.06289	5001	2000		pi.1[29349]	0.5345	0.2096	0.005419	0.06179	0.5666	0.8466	5001	2000
GRMZM5G860137	80	57	123	119		beta.i[38907]	0.001858	0.03099	0.0006587	-0.0578	0.001248	0.0641	5001	2000		pi.1[38907]	0.5263	0.2007	0.004469	0.06179	0.5521	0.8367	5001	2000
GRMZM2G576580	27	60	167	38		beta.i[22878]	0.001799	0.03207	0.0007323	-0.0617	0.002325	0.06596	5001	2000		pi.1[22878]	0.567	0.2127	0.005315	0.06182	0.6011	0.8744	5001	2000
GRMZM2G076303	31	19	139	163		beta.i[40015]	0.001719	0.03151	0.0007508	-0.0585	0.001533	0.06255	5001	2000		pi.1[40015]	0.5589	0.2175	0.004433	0.06189	0.5985	0.8643	5001	2000
GRMZM2G349665	25	5	546	431		beta.i[30513]	0.001977	0.03183	0.0007289	-0.05994	0.002009	0.06464	5001	2000		pi.1[30513]	0.5841	0.2137	0.004306	0.06193	0.6289	0.8805	5001	2000
GRMZM2G166145	27	39	90	115		beta.i[21504]	0.001765	0.03246	0.0007522	-0.06127	0.001207	0.06503	5001	2000		pi.1[21504]	0.579	0.2154	0.004329	0.06194	0.6131	0.8819	5001	2000
GRMZM2G392076	3	4	189	181		beta.i[7480]	0.0009072	0.03114	0.0007383	-0.05885	0.0003651	0.06264	5001	2000		pi.1[7480]	0.7047	0.2604	0.006565	0.06195	0.7795	0.9879	5001	2000
GRMZM2G052985	57	54	134	154		beta.i[10557]	-0.0001991	0.03113	0.0005345	-0.06058	-0.0003936	0.06414	5001	2000		pi.1[10557]	0.5561	0.198	0.004157	0.06196	0.5894	0.846	5001	2000
GRMZM2G075942	58	46	84	123		beta.i[20281]	0.001278	0.03123	0.0006816	-0.06269	0.002116	0.06262	5001	2000		pi.1[20281]	0.5279	0.2024	0.004728	0.06196	0.5565	0.8337	5001	2000
GRMZM2G011777	29	47	71	96		beta.i[23867]	0.0002313	0.03186	0.0007386	-0.06467	0.001788	0.0605	5001	2000		pi.1[23867]	0.5625	0.2153	0.004946	0.06197	0.6015	0.872	5001	2000
GRMZM2G024335	39	20	146	291		beta.i[3807]	0.0003573	0.03202	0.0008055	-0.05959	0.0003784	0.06392	5001	2000		pi.1[3807]	0.5685	0.2073	0.004408	0.06198	0.6033	0.8599	5001	2000
GRMZM2G012340	99	85	72	199		beta.i[19446]	0.001737	0.03118	0.0006972	-0.05846	0.001299	0.06235	5001	2000		pi.1[19446]	0.5212	0.196	0.005213	0.062	0.548	0.8094	5001	2000
GRMZM5G881380	243	86	119	124		beta.i[9237]	0.002044	0.03104	0.0006105	-0.05928	0.001894	0.06311	5001	2000		pi.1[9237]	0.4818	0.1822	0.004367	0.06202	0.5017	0.7771	5001	2000
GRMZM2G019863	74	48	114	139		beta.i[10002]	0.001553	0.03176	0.0007288	-0.06211	0.002657	0.0621	5001	2000		pi.1[10002]	0.5279	0.1994	0.004163	0.06208	0.5587	0.8282	5001	2000
AC155624.2_FG006	48	29	117	183		beta.i[2908]	0.001302	0.03091	0.00072	-0.05782	0.0007582	0.06464	5001	2000		pi.1[2908]	0.5421	0.2091	0.004576	0.06211	0.5739	0.85	5001	2000
AC233893.1_FG006	3	14	44	235		beta.i[39295]	0.0007844	0.03228	0.0007273	-0.06247	0.0008468	0.06567	5001	2000		pi.1[39295]	0.7111	0.2574	0.006359	0.06214	0.7905	0.989	5001	2000
GRMZM2G459755	85	25	115	169		beta.i[27172]	0.001292	0.0318	0.0006553	-0.06054	0.0005918	0.06356	5001	2000		pi.1[27172]	0.505	0.2011	0.005296	0.06215	0.526	0.8213	5001	2000
AC203535.4_FG002	88	33	171	204		beta.i[14676]	0.0008828	0.03113	0.0007449	-0.05974	0.0008449	0.06204	5001	2000		pi.1[14676]	0.5211	0.1959	0.003965	0.06223	0.5476	0.8226	5001	2000
GRMZM2G010783	29	337	43	27		beta.i[9881]	0.002366	0.03108	0.0007364	-0.05517	0.001456	0.06536	5001	2000		pi.1[9881]	0.5519	0.2096	0.004188	0.06224	0.5808	0.8665	5001	2000
GRMZM2G119357	16	12	121	198		beta.i[5673]	0.001406	0.03194	0.0006439	-0.06012	0.001917	0.06342	5001	2000		pi.1[5673]	0.5954	0.2242	0.005636	0.06226	0.6367	0.8994	5001	2000
AC183822.3_FG003	10	73	54	76		beta.i[14568]	0.001371	0.03148	0.0007954	-0.06272	0.002158	0.06292	5001	2000		pi.1[14568]	0.631	0.2207	0.005011	0.06233	0.6776	0.9297	5001	2000
GRMZM2G073792	23	16	178	148		beta.i[20244]	0.001054	0.03188	0.0007453	-0.06115	0.0009556	0.06278	5001	2000		pi.1[20244]	0.5797	0.2165	0.006854	0.06241	0.6154	0.8901	5001	2000
Q9009	16	69	83	85		beta.i[34038]	0.001082	0.03184	0.000614	-0.06385	0.002139	0.0605	5001	2000		pi.1[34038]	0.5942	0.2219	0.005702	0.06243	0.639	0.9033	5001	2000
GRMZM2G128648	69	46	107	97		beta.i[1265]	0.002741	0.03086	0.0006913	-0.05467	0.002833	0.06331	5001	2000		pi.1[1265]	0.5234	0.2016	0.004355	0.0625	0.5562	0.827	5001	2000
GRMZM5G897985	3	3	124	434		beta.i[42391]	0.0009724	0.03261	0.0006895	-0.06231	0.0008661	0.0653	5001	2000		pi.1[42391]	0.7134	0.2519	0.005617	0.06254	0.7873	0.9906	5001	2000
GRMZM5G876543	24	48	84	106		beta.i[2830]	0.001251	0.03177	0.0006371	-0.06149	0.001478	0.06296	5001	2000		pi.1[2830]	0.5832	0.2162	0.004988	0.06259	0.6219	0.8808	5001	2000
GRMZM2G443701	3	4	212	210		beta.i[34355]	-0.001361	0.03175	0.0006816	-0.06345	-0.00129	0.061	5001	2000		pi.1[34355]	0.7087	0.2503	0.006407	0.06259	0.7738	0.988	5001	2000
GRMZM2G311182	319	58	221	117		beta.i[6908]	0.0008375	0.0314	0.0007388	-0.06071	0.0003654	0.06452	5001	2000		pi.1[6908]	0.4718	0.1768	0.003628	0.06268	0.4895	0.7592	5001	2000
GRMZM2G086371	47	56	84	145		beta.i[11055]	0.001109	0.03143	0.0006176	-0.06043	0.001425	0.0612	5001	2000		pi.1[11055]	0.5482	0.2099	0.005069	0.06268	0.5827	0.849	5001	2000
GRMZM2G014137	5	14	88	91		beta.i[3612]	0.0007848	0.03162	0.0008429	-0.06131	0.001218	0.06428	5001	2000		pi.1[3612]	0.6663	0.243	0.006165	0.06271	0.7179	0.9695	5001	2000
GRMZM5G823827	18	28	176	77		beta.i[2652]	0.000131	0.03112	0.0006435	-0.06279	0.0001948	0.06059	5001	2000		pi.1[2652]	0.5915	0.2158	0.00493	0.06274	0.6296	0.8946	5001	2000
GRMZM5G876973	14	12	136	142		beta.i[9197]	0.001612	0.03145	0.0007849	-0.05959	0.002037	0.06197	5001	2000		pi.1[9197]	0.6007	0.2289	0.005009	0.06275	0.6465	0.9074	5001	2000
GRMZM2G125308	25	20	125	165		beta.i[20948]	0.001278	0.03115	0.0005891	-0.0597	0.001566	0.06199	5001	2000		pi.1[20948]	0.5732	0.2181	0.00421	0.06279	0.6044	0.8829	5001	2000
GRMZM2G434541	4	3	334	245		beta.i[17929]	0.001265	0.03241	0.0006241	-0.06221	0.00147	0.06381	5001	2000		pi.1[17929]	0.6893	0.2444	0.006068	0.0628	0.7466	0.9806	5001	2000
GRMZM2G008611	9	57	44	50		beta.i[297]	-0.0003044	0.03149	0.0006536	-0.06236	-5.806e-05	0.05992	5001	2000		pi.1[297]	0.6103	0.2353	0.004827	0.06281	0.6524	0.9302	5001	2000
GRMZM2G115817	78	54	105	153		beta.i[11489]	0.001471	0.03089	0.0006481	-0.06177	0.002203	0.06257	5001	2000		pi.1[11489]	0.5295	0.2006	0.005041	0.06281	0.5604	0.8288	5001	2000
GRMZM2G074805	69	61	170	63		beta.i[24699]	0.0005643	0.0313	0.0007531	-0.06245	0.0007999	0.06277	5001	2000		pi.1[24699]	0.5259	0.201	0.003818	0.06282	0.5529	0.8279	5001	2000
GRMZM2G465453	2	8	78	140		beta.i[18083]	0.001526	0.03143	0.0005953	-0.06105	0.0009041	0.06511	5001	2000		pi.1[18083]	0.7342	0.2537	0.006285	0.06283	0.8088	0.994	5001	2000
GRMZM2G433117	69	40	137	155		beta.i[41547]	0.001278	0.03199	0.0007851	-0.06057	0.0003428	0.06537	5001	2000		pi.1[41547]	0.5303	0.2027	0.00553	0.06289	0.5619	0.8425	5001	2000
GRMZM2G347488	28	48	85	66		beta.i[12752]	0.002463	0.03179	0.0005843	-0.05886	0.002426	0.06301	5001	2000		pi.1[12752]	0.5654	0.2141	0.003691	0.0629	0.6013	0.8769	5001	2000
GRMZM2G323504	31	63	63	116		beta.i[12595]	0.0006964	0.03188	0.0008444	-0.062	0.0006982	0.06516	5001	2000		pi.1[12595]	0.5693	0.2132	0.004926	0.06297	0.6087	0.8707	5001	2000
GRMZM2G701193	27	41	118	156		beta.i[31326]	0.0008578	0.03064	0.0007373	-0.05828	0.0005304	0.06015	5001	2000		pi.1[31326]	0.5857	0.2089	0.004733	0.06298	0.6171	0.8802	5001	2000
GRMZM2G172829	123	67	92	147		beta.i[37476]	0.002118	0.0326	0.0007622	-0.0605	0.001518	0.06742	5001	2000		pi.1[37476]	0.5072	0.1955	0.003729	0.06298	0.5321	0.81	5001	2000
GRMZM2G017685	51	193	50	29		beta.i[39468]	0.000524	0.03184	0.0007068	-0.06115	0.0002223	0.06124	5001	2000		pi.1[39468]	0.5237	0.2044	0.003786	0.06303	0.55	0.8314	5001	2000
GRMZM2G130043	57	28	108	255		beta.i[21022]	0.002	0.03124	0.0006527	-0.05778	0.001684	0.06397	5001	2000		pi.1[21022]	0.5467	0.2061	0.004889	0.06304	0.5806	0.842	5001	2000
GRMZM2G172671	381	413	41	39		beta.i[40944]	0.001299	0.03068	0.0006822	-0.05733	0.002124	0.06128	5001	2000		pi.1[40944]	0.4527	0.18	0.004509	0.06306	0.4699	0.7504	5001	2000
GRMZM2G044581	85	26	123	112		beta.i[15409]	0.001567	0.03172	0.0007785	-0.05893	0.001473	0.06345	5001	2000		pi.1[15409]	0.5006	0.2023	0.004781	0.0631	0.5246	0.8181	5001	2000
GRMZM2G117482	115	59	135	111		beta.i[29568]	0.002347	0.03122	0.0006724	-0.05837	0.001653	0.06583	5001	2000		pi.1[29568]	0.5078	0.1945	0.004257	0.06312	0.5294	0.8124	5001	2000
GRMZM2G163476	95	113	31	264		beta.i[16972]	0.001687	0.03243	0.0007869	-0.06318	0.002405	0.06403	5001	2000		pi.1[16972]	0.5171	0.2019	0.004791	0.06317	0.5496	0.827	5001	2000
GRMZM2G302604	47	26	163	126		beta.i[33768]	0.001454	0.03105	0.0006983	-0.06049	0.001348	0.06158	5001	2000		pi.1[33768]	0.5331	0.2087	0.005093	0.06326	0.5614	0.8416	5001	2000
GRMZM2G140299	34	127	38	92		beta.i[11820]	0.002168	0.03259	0.000841	-0.06053	0.00224	0.06692	5001	2000		pi.1[11820]	0.5536	0.2087	0.00469	0.06336	0.5802	0.8668	5001	2000
GRMZM2G423292	29	91	80	67		beta.i[22341]	0.001643	0.03184	0.0007562	-0.06173	0.00191	0.06327	5001	2000		pi.1[22341]	0.5675	0.2103	0.004591	0.06336	0.598	0.8778	5001	2000
GRMZM5G884325	47	90	78	51		beta.i[9268]	0.001151	0.03261	0.0007507	-0.06511	0.00132	0.06322	5001	2000		pi.1[9268]	0.5317	0.2117	0.004094	0.0634	0.5667	0.8461	5001	2000
GRMZM2G177617	56	60	98	110		beta.i[37523]	0.001428	0.03109	0.0006732	-0.05721	1.401e-05	0.06507	5001	2000		pi.1[37523]	0.5423	0.199	0.005238	0.0634	0.5733	0.8384	5001	2000
GRMZM2G102189	29	59	77	106		beta.i[25104]	0.001349	0.03192	0.0006687	-0.0632	0.001519	0.06305	5001	2000		pi.1[25104]	0.5646	0.2125	0.005098	0.06344	0.6031	0.878	5001	2000
GRMZM5G844708	9	11	195	87		beta.i[42151]	0.001416	0.03177	0.00064	-0.05966	0.001097	0.06291	5001	2000		pi.1[42151]	0.6245	0.2305	0.004847	0.06347	0.6705	0.9372	5001	2000
GRMZM2G017525	33	32	62	206		beta.i[15052]	0.000596	0.03127	0.0006771	-0.05899	0.0002492	0.0643	5001	2000		pi.1[15052]	0.5617	0.212	0.003841	0.06353	0.5963	0.8693	5001	2000
GRMZM2G348325	3	2	236	347		beta.i[30500]	0.002187	0.03112	0.0006886	-0.0599	0.003085	0.06371	5001	2000		pi.1[30500]	0.7066	0.2597	0.00616	0.06355	0.7804	0.9869	5001	2000
GRMZM2G040158	42	58	63	87		beta.i[4103]	0.002481	0.03043	0.0006541	-0.05958	0.003196	0.06076	5001	2000		pi.1[4103]	0.5435	0.2198	0.004585	0.06356	0.5793	0.8685	5001	2000
GRMZM2G422171	178	208	57	49		beta.i[13231]	0.0008957	0.03189	0.0007538	-0.05995	0.001609	0.06367	5001	2000		pi.1[13231]	0.4872	0.188	0.004347	0.06356	0.5092	0.7924	5001	2000
GRMZM2G058095	7	33	46	186		beta.i[10636]	0.0009682	0.03128	0.0007038	-0.06267	0.0009424	0.06132	5001	2000		pi.1[10636]	0.6554	0.2381	0.005983	0.06359	0.7121	0.9508	5001	2000
GRMZM2G094083	62	64	127	60		beta.i[20513]	0.0005083	0.03083	0.0006483	-0.06143	0.001938	0.05908	5001	2000		pi.1[20513]	0.5278	0.2044	0.004361	0.06364	0.5602	0.8343	5001	2000
GRMZM2G002427	20	68	84	86		beta.i[35467]	0.0009912	0.0315	0.0006832	-0.06078	0.001691	0.06227	5001	2000		pi.1[35467]	0.5904	0.2191	0.004658	0.06364	0.6338	0.8935	5001	2000
GRMZM2G140047	27	35	158	105		beta.i[21163]	0.001473	0.03156	0.0007179	-0.05971	0.002696	0.06349	5001	2000		pi.1[21163]	0.5821	0.2106	0.004313	0.06366	0.6236	0.8748	5001	2000
GRMZM2G005339	90	265	54	42		beta.i[39355]	0.0009482	0.03106	0.0008051	-0.06122	0.001298	0.0609	5001	2000		pi.1[39355]	0.5115	0.1942	0.003835	0.06371	0.5332	0.8176	5001	2000
GRMZM2G156983	84	48	67	121		beta.i[25936]	0.0009102	0.03236	0.0007934	-0.06287	0.00185	0.06522	5001	2000		pi.1[25936]	0.5131	0.1978	0.004208	0.06373	0.5386	0.82	5001	2000
GRMZM2G039186	44	51	79	98		beta.i[4079]	0.001352	0.0317	0.0006681	-0.06125	0.001283	0.06289	5001	2000		pi.1[4079]	0.5365	0.2096	0.004675	0.06375	0.5681	0.8529	5001	2000
GRMZM2G155285	27	47	82	100		beta.i[16850]	0.002498	0.03197	0.0006401	-0.05945	0.003603	0.06606	5001	2000		pi.1[16850]	0.5686	0.2098	0.003896	0.06383	0.6003	0.8689	5001	2000
GRMZM2G000686	182	73	154	167		beta.i[3327]	0.0007878	0.03204	0.0006498	-0.06071	0.001714	0.06428	5001	2000		pi.1[3327]	0.5006	0.1792	0.004	0.06391	0.5232	0.7897	5001	2000
GRMZM5G898867	6	25	54	182		beta.i[39088]	0.000282	0.0322	0.000755	-0.06437	-7.499e-05	0.06179	5001	2000		pi.1[39088]	0.6701	0.2409	0.005522	0.06392	0.725	0.9626	5001	2000
GRMZM5G883585	61	147	42	79		beta.i[14441]	0.001219	0.03093	0.0007298	-0.05616	0.001044	0.06317	5001	2000		pi.1[14441]	0.5203	0.202	0.004788	0.06394	0.5461	0.8313	5001	2000
GRMZM2G056695	43	98	50	78		beta.i[10615]	0.001398	0.03122	0.0007511	-0.05927	0.001717	0.06203	5001	2000		pi.1[10615]	0.5396	0.2081	0.004716	0.06395	0.5749	0.8443	5001	2000
GRMZM2G127426	88	67	111	135		beta.i[29679]	0.0008837	0.03103	0.0007107	-0.06177	0.001046	0.06112	5001	2000		pi.1[29679]	0.5242	0.1974	0.004021	0.06397	0.5507	0.8214	5001	2000
GRMZM2G142820	108	58	104	135		beta.i[1384]	0.0005028	0.03133	0.0007656	-0.06348	0.00149	0.05945	5001	2000		pi.1[1384]	0.5102	0.1947	0.003591	0.06402	0.5369	0.8158	5001	2000
GRMZM2G428987	365	35	244	161		beta.i[17896]	0.001149	0.03087	0.0007575	-0.06138	0.00225	0.06013	5001	2000		pi.1[17896]	0.4592	0.1791	0.003566	0.06407	0.4758	0.7472	5001	2000
GRMZM2G019266	2	10	81	187		beta.i[15072]	0.0006516	0.03207	0.0005783	-0.06273	0.001685	0.06421	5001	2000		pi.1[15072]	0.7346	0.2572	0.005422	0.06417	0.8148	0.993	5001	2000
GRMZM5G861064	80	63	116	146		beta.i[27980]	0.001384	0.03205	0.0007528	-0.05934	0.001606	0.06342	5001	2000		pi.1[27980]	0.5304	0.1968	0.00459	0.06427	0.5578	0.8293	5001	2000
GRMZM2G061884	44	154	56	35		beta.i[32612]	0.001706	0.03168	0.0007547	-0.0603	0.001869	0.06277	5001	2000		pi.1[32612]	0.5451	0.2059	0.004616	0.06434	0.5765	0.8532	5001	2000
GRMZM2G304132	62	156	65	83		beta.i[6859]	0.001271	0.03143	0.0007342	-0.06251	0.001903	0.06249	5001	2000		pi.1[6859]	0.5378	0.2033	0.00502	0.06435	0.568	0.8362	5001	2000
GRMZM2G139815	17	34	93	111		beta.i[33379]	0.0009021	0.03254	0.0006369	-0.0625	0.0009057	0.06394	5001	2000		pi.1[33379]	0.5956	0.2229	0.005407	0.0644	0.6327	0.9029	5001	2000
GRMZM5G875572	200	174	80	31		beta.i[9187]	0.002893	0.03151	0.0007052	-0.06308	0.003456	0.06338	5001	2000		pi.1[9187]	0.4757	0.1896	0.005151	0.06441	0.4962	0.7776	5001	2000
GRMZM2G430548	92	183	73	52		beta.i[34288]	0.002109	0.03201	0.0007659	-0.06068	0.002134	0.06292	5001	2000		pi.1[34288]	0.5146	0.1948	0.004481	0.06441	0.5402	0.8108	5001	2000
GRMZM2G166620	23	61	55	125		beta.i[17008]	0.0006646	0.03121	0.0007983	-0.0613	0.001093	0.06342	5001	2000		pi.1[17008]	0.5836	0.215	0.004978	0.06444	0.6207	0.8845	5001	2000
RGD2	60	55	102	66		beta.i[9332]	0.00208	0.03177	0.0007472	-0.06192	0.002639	0.06232	5001	2000		pi.1[9332]	0.5315	0.201	0.00465	0.06445	0.5607	0.8318	5001	2000
GRMZM2G043238	3	9	94	158		beta.i[35938]	0.002016	0.03228	0.0007266	-0.06165	0.001337	0.06715	5001	2000		pi.1[35938]	0.7025	0.2487	0.00585	0.06447	0.7676	0.9861	5001	2000
GRMZM2G005848	33	45	83	169		beta.i[256]	-0.0009249	0.03134	0.0006367	-0.06193	-0.001355	0.06183	5001	2000		pi.1[256]	0.5711	0.2069	0.00507	0.06448	0.6043	0.8697	5001	2000
GRMZM2G153999	19	39	85	82		beta.i[21325]	0.0005371	0.03145	0.0007105	-0.06263	0.00104	0.05965	5001	2000		pi.1[21325]	0.5775	0.2241	0.005912	0.06449	0.6166	0.8914	5001	2000
orc3	30	34	118	127		beta.i[7416]	0.0007875	0.03164	0.0007783	-0.06092	3.849e-05	0.06272	5001	2000		pi.1[7416]	0.58	0.2102	0.00479	0.06452	0.6142	0.8858	5001	2000
GRMZM5G853392	21	66	70	65		beta.i[27933]	0.001404	0.03194	0.0005862	-0.0611	0.001577	0.06542	5001	2000		pi.1[27933]	0.5838	0.2174	0.004832	0.06457	0.6222	0.8972	5001	2000
GRMZM2G432480	15	32	128	108		beta.i[27056]	0.0004585	0.0309	0.0006074	-0.06124	0.0005045	0.0603	5001	2000		pi.1[27056]	0.6035	0.2232	0.005168	0.06461	0.6523	0.9063	5001	2000
GRMZM2G146761	64	55	140	140		beta.i[11904]	0.001711	0.03247	0.0007167	-0.06171	0.002202	0.06384	5001	2000		pi.1[11904]	0.5392	0.1998	0.005162	0.06465	0.5701	0.8363	5001	2000
GRMZM2G143512	20	5	316	543		beta.i[11858]	0.00142	0.03122	0.0009466	-0.05894	0.0007447	0.06258	5001	2000		pi.1[11858]	0.5968	0.2192	0.005468	0.06467	0.6439	0.8906	5001	2000
GRMZM2G057067	56	38	127	89		beta.i[15597]	0.002201	0.03182	0.0005859	-0.05958	0.002801	0.06207	5001	2000		pi.1[15597]	0.5371	0.2018	0.004309	0.06468	0.5627	0.8375	5001	2000
GRMZM2G122362	18	49	75	80		beta.i[16449]	0.001155	0.03254	0.0005315	-0.0645	0.001391	0.06396	5001	2000		pi.1[16449]	0.5748	0.2259	0.004953	0.06469	0.6113	0.8992	5001	2000
GRMZM2G065593	57	43	74	153		beta.i[36202]	0.001467	0.03178	0.0007836	-0.06004	0.001803	0.06494	5001	2000		pi.1[36202]	0.535	0.2072	0.004874	0.06469	0.5663	0.838	5001	2000
GRMZM2G337706	343	13	353	667		beta.i[1878]	0.002281	0.03168	0.000833	-0.05954	0.003033	0.06106	5001	2000		pi.1[1878]	0.4599	0.181	0.004365	0.0647	0.4808	0.7578	5001	2000
GRMZM2G350818	22	32	94	169		beta.i[30517]	0.0008431	0.03126	0.0007446	-0.06153	0.0009396	0.06071	5001	2000		pi.1[30517]	0.5942	0.2143	0.005436	0.06473	0.6359	0.8847	5001	2000
GRMZM2G047299	741	78	132	243		beta.i[4274]	0.001602	0.03108	0.001018	-0.06071	0.002051	0.06195	5001	2000		pi.1[4274]	0.4426	0.1707	0.003574	0.06475	0.4613	0.7257	5001	2000
GRMZM2G138566	32	42	98	91		beta.i[21129]	0.001955	0.0318	0.0006727	-0.0587	0.002245	0.06629	5001	2000		pi.1[21129]	0.5677	0.2121	0.005285	0.06476	0.6036	0.8799	5001	2000
GRMZM2G351160	43	41	117	125		beta.i[7195]	0.0006632	0.03265	0.0006273	-0.06293	-0.0002944	0.06593	5001	2000		pi.1[7195]	0.5587	0.2031	0.004986	0.06478	0.5889	0.8477	5001	2000
GRMZM2G162119	10	10	166	166		beta.i[16947]	0.0001504	0.03248	0.0007531	-0.06184	0.0002665	0.06373	5001	2000		pi.1[16947]	0.6226	0.2315	0.005747	0.06478	0.672	0.9338	5001	2000
GRMZM2G069596	63	28	108	247		beta.i[24627]	0.001439	0.03141	0.0007701	-0.06165	0.00104	0.06253	5001	2000		pi.1[24627]	0.5375	0.2042	0.004287	0.06482	0.5708	0.848	5001	2000
GRMZM2G456217	3	6	131	147		beta.i[7988]	0.000878	0.03162	0.0005296	-0.05901	0.003003	0.05945	5001	2000		pi.1[7988]	0.7114	0.2528	0.00546	0.06483	0.7844	0.9874	5001	2000
GRMZM5G892467	17	19	101	144		beta.i[31717]	0.002044	0.03154	0.0006444	-0.05837	0.001214	0.06383	5001	2000		pi.1[31717]	0.5955	0.2222	0.004169	0.06502	0.6435	0.8984	5001	2000
GRMZM2G075384	167	28	145	336		beta.i[10864]	0.00109	0.03124	0.00054	-0.06025	0.0009147	0.06277	5001	2000		pi.1[10864]	0.495	0.1908	0.004512	0.06505	0.5214	0.7969	5001	2000
GRMZM2G110412	3	10	71	200		beta.i[11406]	-0.001041	0.03192	0.0007167	-0.06183	-0.00123	0.06154	5001	2000		pi.1[11406]	0.7185	0.252	0.006899	0.06509	0.7949	0.9883	5001	2000
GRMZM5G892250	3	5	208	245		beta.i[42366]	0.0002228	0.03046	0.0007003	-0.05964	9.833e-05	0.06007	5001	2000		pi.1[42366]	0.714	0.2533	0.00693	0.0651	0.7871	0.9892	5001	2000
GRMZM2G083427	40	65	80	108		beta.i[40085]	0.001022	0.03196	0.000702	-0.06091	0.0008181	0.06362	5001	2000		pi.1[40085]	0.5528	0.2106	0.004679	0.06512	0.5894	0.8635	5001	2000
GRMZM2G179800	88	64	94	141		beta.i[21669]	0.0002943	0.03167	0.0006818	-0.0601	-0.0004523	0.0655	5001	2000		pi.1[21669]	0.5204	0.1986	0.004112	0.06515	0.5529	0.8266	5001	2000
GRMZM2G338465	21	20	77	182		beta.i[17409]	0.0014	0.03216	0.0006561	-0.06368	0.002495	0.06367	5001	2000		pi.1[17409]	0.5892	0.2204	0.004183	0.06516	0.6306	0.8861	5001	2000
GRMZM2G115182	33	56	122	55		beta.i[5593]	0.001678	0.03227	0.0007202	-0.06424	0.002363	0.06422	5001	2000		pi.1[5593]	0.556	0.2082	0.004578	0.0652	0.5887	0.8616	5001	2000
GRMZM5G873015	106	100	101	46		beta.i[14359]	0.0007588	0.03135	0.0007726	-0.0614	0.0001095	0.06478	5001	2000		pi.1[14359]	0.5045	0.1944	0.00448	0.0653	0.5312	0.8083	5001	2000
GRMZM2G093838	15	45	118	57		beta.i[32922]	-0.0003014	0.03064	0.0006058	-0.06081	0.0005039	0.05929	5001	2000		pi.1[32922]	0.6007	0.2199	0.005081	0.06536	0.6359	0.9121	5001	2000
GRMZM2G041060	153	176	55	53		beta.i[19800]	0.0004705	0.03107	0.0006314	-0.06016	0.0001116	0.06275	5001	2000		pi.1[19800]	0.4876	0.1889	0.004329	0.06539	0.5113	0.7832	5001	2000
GRMZM2G179810	16	48	70	106		beta.i[21670]	0.002372	0.03136	0.0008959	-0.0589	0.002459	0.06364	5001	2000		pi.1[21670]	0.5951	0.2236	0.004448	0.06544	0.6385	0.8977	5001	2000
GRMZM2G329159	32	56	60	76		beta.i[7036]	0.001672	0.03119	0.0006124	-0.05651	0.001266	0.0663	5001	2000		pi.1[7036]	0.5511	0.2166	0.005896	0.06553	0.5807	0.8661	5001	2000
GRMZM2G018712	75	40	97	115		beta.i[32140]	0.0008707	0.03068	0.0005825	-0.05773	0.001419	0.06006	5001	2000		pi.1[32140]	0.5151	0.2057	0.004054	0.06553	0.5471	0.8286	5001	2000
GRMZM2G021549	30	56	77	89		beta.i[28618]	0.00151	0.03201	0.0007733	-0.06293	0.001544	0.06173	5001	2000		pi.1[28618]	0.5631	0.2154	0.004227	0.06556	0.602	0.8622	5001	2000
GRMZM2G173721	152	69	96	130		beta.i[12321]	0.0007575	0.032	0.0005927	-0.06266	0.000425	0.06099	5001	2000		pi.1[12321]	0.4969	0.1929	0.004281	0.0656	0.5237	0.7871	5001	2000
9C20.6b	32	75	105	74		beta.i[41440]	0.0008133	0.03143	0.000768	-0.06039	0.001147	0.06123	5001	2000		pi.1[41440]	0.5598	0.2099	0.004712	0.06563	0.5991	0.8599	5001	2000
GRMZM2G053803	29	39	91	140		beta.i[4389]	0.001333	0.03071	0.0006674	-0.0569	0.0009169	0.06229	5001	2000		pi.1[4389]	0.5751	0.2153	0.004831	0.0657	0.6158	0.8766	5001	2000
GRMZM2G047028	41	23	127	210		beta.i[15446]	0.001139	0.03109	0.0006619	-0.0614	0.0008397	0.05937	5001	2000		pi.1[15446]	0.5615	0.205	0.004432	0.06573	0.592	0.8611	5001	2000
AC234185.1_FG004	6	13	107	153		beta.i[35420]	0.001143	0.03188	0.0007711	-0.06209	0.001281	0.06265	5001	2000		pi.1[35420]	0.6678	0.2386	0.005164	0.06573	0.7246	0.959	5001	2000
GRMZM2G466044	13	64	61	59		beta.i[27220]	0.0005272	0.03128	0.000773	-0.06048	8.338e-05	0.06363	5001	2000		pi.1[27220]	0.6085	0.2283	0.005006	0.06576	0.6546	0.9132	5001	2000
GRMZM2G073377	251	185	47	82		beta.i[32726]	0.0006791	0.03176	0.0007265	-0.06045	-0.0001988	0.06467	5001	2000		pi.1[32726]	0.465	0.1888	0.003457	0.06576	0.4855	0.7661	5001	2000
GRMZM2G379773	39	44	89	97		beta.i[7406]	0.001492	0.03153	0.0006157	-0.05878	0.0007466	0.06594	5001	2000		pi.1[7406]	0.5508	0.2086	0.005023	0.06579	0.5852	0.8611	5001	2000
GRMZM5G827549	40	3	550	1205		beta.i[31437]	0.0009419	0.03212	0.0009543	-0.06177	0.001908	0.06355	5001	2000		pi.1[31437]	0.5491	0.2035	0.004931	0.06585	0.5768	0.852	5001	2000
GRMZM2G147885	17	38	93	170		beta.i[11924]	0.001454	0.03254	0.0007247	-0.06207	0.001032	0.06448	5001	2000		pi.1[11924]	0.6059	0.2186	0.005315	0.06591	0.6526	0.9035	5001	2000
GRMZM2G302913	3	2	190	362		beta.i[17197]	0.0004727	0.03148	0.0008507	-0.05904	-6.64e-05	0.06049	5001	2000		pi.1[17197]	0.6975	0.2574	0.007501	0.06594	0.7668	0.9886	5001	2000
GRMZM5G890163	61	60	97	107		beta.i[18972]	0.001675	0.03206	0.0007534	-0.06026	0.001151	0.06521	5001	2000		pi.1[18972]	0.5352	0.2038	0.004192	0.06605	0.567	0.841	5001	2000
GRMZM2G388539	46	46	66	156		beta.i[13007]	0.001026	0.03078	0.0006182	-0.05893	0.000633	0.06148	5001	2000		pi.1[13007]	0.5428	0.2105	0.003619	0.06606	0.5766	0.8498	5001	2000
GRMZM2G030873	23	29	82	83		beta.i[24151]	0.001683	0.03138	0.0007898	-0.05769	0.001402	0.0642	5001	2000		pi.1[24151]	0.566	0.2189	0.004791	0.06607	0.6076	0.882	5001	2000
GRMZM2G072612	55	46	83	190		beta.i[20222]	0.000842	0.03192	0.0008923	-0.06143	0.001144	0.06282	5001	2000		pi.1[20222]	0.5411	0.2009	0.004083	0.06608	0.5695	0.8415	5001	2000
GRMZM2G069316	118	37	220	119		beta.i[24625]	0.0018	0.03159	0.0007819	-0.06019	0.002424	0.06458	5001	2000		pi.1[24625]	0.5015	0.192	0.004217	0.06609	0.5252	0.8019	5001	2000
GRMZM2G177982	21	371	31	30		beta.i[40989]	0.001882	0.03136	0.0008234	-0.05956	0.002067	0.0656	5001	2000		pi.1[40989]	0.5593	0.2217	0.004636	0.06609	0.5947	0.8835	5001	2000
GRMZM2G363715	52	58	115	129		beta.i[12859]	0.001122	0.03116	0.0007465	-0.06066	0.0004214	0.06198	5001	2000		pi.1[12859]	0.5457	0.2043	0.004168	0.06613	0.5747	0.8478	5001	2000
GRMZM2G416019	40	41	112	189		beta.i[7664]	0.0002252	0.03184	0.0007071	-0.06325	0.0005317	0.06563	5001	2000		pi.1[7664]	0.5677	0.2058	0.003651	0.06615	0.6029	0.8643	5001	2000
GRMZM2G024882	28	37	119	101		beta.i[24052]	0.001567	0.03238	0.0007244	-0.0628	0.0008223	0.06574	5001	2000		pi.1[24052]	0.5758	0.2085	0.0041	0.06617	0.6156	0.8724	5001	2000
GRMZM2G086093	73	54	119	151		beta.i[4998]	8.634e-05	0.03119	0.0007436	-0.05913	-0.0001134	0.06195	5001	2000		pi.1[4998]	0.5356	0.1983	0.004327	0.06619	0.5681	0.8298	5001	2000
GRMZM5G821668	209	71	104	121		beta.i[27747]	0.0008352	0.03112	0.0006881	-0.06311	0.0009516	0.05894	5001	2000		pi.1[27747]	0.4769	0.1902	0.003903	0.06619	0.4985	0.7769	5001	2000
GRMZM2G168393	58	32	118	143		beta.i[37408]	0.001272	0.03205	0.0006926	-0.06261	0.0009562	0.06488	5001	2000		pi.1[37408]	0.5301	0.2042	0.00504	0.06625	0.5559	0.8392	5001	2000
GRMZM2G347645	84	59	124	119		beta.i[26567]	0.0009497	0.03156	0.0007031	-0.05993	0.001149	0.06583	5001	2000		pi.1[26567]	0.5222	0.2026	0.003405	0.06627	0.5541	0.8297	5001	2000
GRMZM2G139880	102	57	120	207		beta.i[21157]	0.003088	0.0318	0.0007601	-0.05734	0.0033	0.06573	5001	2000		pi.1[21157]	0.5206	0.1931	0.004243	0.0663	0.5462	0.8089	5001	2000
SE1B	27	44	82	153		beta.i[22103]	0.0003356	0.0308	0.0006837	-0.06095	0.0006173	0.06157	5001	2000		pi.1[22103]	0.5807	0.2113	0.004714	0.06634	0.6196	0.8793	5001	2000
GRMZM2G040737	31	72	59	110		beta.i[4120]	0.002449	0.03154	0.0005666	-0.06083	0.003497	0.06309	5001	2000		pi.1[4120]	0.5627	0.2128	0.004693	0.06635	0.5997	0.8714	5001	2000
GRMZM2G082387	101	148	51	97		beta.i[15965]	0.001322	0.03068	0.0006812	-0.05909	0.001802	0.0603	5001	2000		pi.1[15965]	0.508	0.1935	0.004539	0.06638	0.5316	0.809	5001	2000
GRMZM5G816891	73	51	99	145		beta.i[18568]	0.001888	0.03151	0.0006991	-0.06252	0.001884	0.06371	5001	2000		pi.1[18568]	0.5364	0.1971	0.004607	0.06642	0.5687	0.8189	5001	2000
GRMZM2G165192	19	22	144	97		beta.i[16990]	0.001976	0.03156	0.0008182	-0.0582	0.002392	0.06581	5001	2000		pi.1[16990]	0.5901	0.2208	0.004628	0.06645	0.6292	0.8972	5001	2000
GRMZM2G032022	92	48	124	146		beta.i[10195]	0.001137	0.03222	0.0006627	-0.05975	0.0003736	0.06588	5001	2000		pi.1[10195]	0.5221	0.195	0.00342	0.0665	0.5522	0.8238	5001	2000
GRMZM2G117108	53	47	113	177		beta.i[25352]	0.0004482	0.03221	0.0008557	-0.05895	0.0002145	0.06509	5001	2000		pi.1[25352]	0.5523	0.2032	0.004917	0.06652	0.5833	0.8512	5001	2000
GRMZM2G104013	164	64	134	136		beta.i[11310]	0.001621	0.03169	0.000585	-0.06088	0.001733	0.06519	5001	2000		pi.1[11310]	0.493	0.1918	0.004875	0.06658	0.5175	0.7882	5001	2000
GRMZM2G135763	18	38	100	128		beta.i[33326]	0.0003373	0.0315	0.0007856	-0.06305	0.001101	0.06073	5001	2000		pi.1[33326]	0.5981	0.2207	0.005446	0.06658	0.6394	0.8986	5001	2000
GRMZM2G041534	31	108	73	80		beta.i[10354]	0.0006023	0.03087	0.0007098	-0.06186	0.0001532	0.0604	5001	2000		pi.1[10354]	0.5754	0.2041	0.005098	0.06669	0.6083	0.8766	5001	2000
GRMZM2G052078	42	25	102	248		beta.i[10535]	0.001591	0.03128	0.0007314	-0.05827	0.002017	0.06504	5001	2000		pi.1[10535]	0.5642	0.2062	0.004981	0.06674	0.5959	0.862	5001	2000
GRMZM2G352912	324	80	108	128		beta.i[17494]	-0.0005153	0.03169	0.0007646	-0.06272	-0.0001584	0.05966	5001	2000		pi.1[17494]	0.4659	0.1829	0.004346	0.06677	0.4827	0.7716	5001	2000
GRMZM2G070422	82	86	75	201		beta.i[20182]	0.000964	0.03098	0.0005346	-0.05782	3.01e-05	0.06225	5001	2000		pi.1[20182]	0.5323	0.1943	0.004751	0.06677	0.5622	0.8252	5001	2000
GRMZM2G016660	54	40	129	178		beta.i[32119]	0.001365	0.03168	0.0006796	-0.06013	0.001335	0.06385	5001	2000		pi.1[32119]	0.5499	0.1988	0.004514	0.0668	0.5828	0.8465	5001	2000
GRMZM2G170382	34	47	101	80		beta.i[6607]	0.0009357	0.03113	0.0007106	-0.06064	0.0004694	0.0608	5001	2000		pi.1[6607]	0.5567	0.2086	0.004455	0.06685	0.589	0.8676	5001	2000
GRMZM2G118479	25	33	117	167		beta.i[25367]	0.00167	0.03114	0.0005497	-0.05829	0.002435	0.06478	5001	2000		pi.1[25367]	0.5919	0.2168	0.005109	0.06687	0.6335	0.8865	5001	2000
GRMZM2G091726	3	23	49	117		beta.i[20487]	0.001686	0.03188	0.0007964	-0.05869	0.001543	0.06472	5001	2000		pi.1[20487]	0.6937	0.2528	0.006778	0.06689	0.7606	0.9873	5001	2000
GRMZM2G054938	29	19	157	202		beta.i[28942]	0.00151	0.03212	0.0006715	-0.06074	0.002003	0.06427	5001	2000		pi.1[28942]	0.5751	0.2102	0.004981	0.06696	0.6164	0.8791	5001	2000
GRMZM2G435589	39	98	70	66		beta.i[17933]	0.001636	0.03168	0.0006712	-0.05888	0.001364	0.06634	5001	2000		pi.1[17933]	0.5593	0.2042	0.004573	0.06707	0.5924	0.8611	5001	2000
GRMZM2G033644	127	37	161	257		beta.i[15265]	0.00104	0.03211	0.0006092	-0.06159	0.001438	0.06655	5001	2000		pi.1[15265]	0.5133	0.191	0.003605	0.06708	0.539	0.8153	5001	2000
Umi8	6	10	81	257		beta.i[17365]	0.00092	0.03165	0.0007301	-0.06026	0.001038	0.06498	5001	2000		pi.1[17365]	0.6684	0.2441	0.005136	0.0671	0.7295	0.9568	5001	2000
GRMZM2G139647	29	12	287	179		beta.i[21151]	0.0003232	0.03233	0.0007533	-0.06392	0.0007217	0.06352	5001	2000		pi.1[21151]	0.564	0.215	0.004765	0.06712	0.6006	0.8684	5001	2000
GRMZM2G361166	8	52	70	96		beta.i[41274]	0.00101	0.03094	0.0006725	-0.05914	0.0005095	0.06003	5001	2000		pi.1[41274]	0.638	0.2332	0.004622	0.06714	0.6896	0.9431	5001	2000
GRMZM2G071832	17	38	121	74		beta.i[10818]	0.001371	0.03121	0.0006057	-0.06189	0.001373	0.06269	5001	2000		pi.1[10818]	0.6004	0.2234	0.005133	0.06729	0.6424	0.9008	5001	2000
GRMZM2G068151	36	65	87	101		beta.i[15764]	0.001223	0.03158	0.000685	-0.05884	0.001449	0.06461	5001	2000		pi.1[15764]	0.5546	0.2092	0.004002	0.06731	0.5824	0.8674	5001	2000
GRMZM2G042548	13	33	109	88		beta.i[15390]	-5.94e-05	0.03173	0.0007072	-0.06168	-0.0001726	0.06126	5001	2000		pi.1[15390]	0.6111	0.2259	0.005809	0.06735	0.656	0.9102	5001	2000
GRMZM2G110626	54	63	127	88		beta.i[25235]	-0.000113	0.03163	0.000894	-0.06139	-0.0003363	0.06266	5001	2000		pi.1[25235]	0.54	0.2035	0.004922	0.06742	0.5691	0.8407	5001	2000
GRMZM5G849545	183	248	67	90		beta.i[23168]	0.0009478	0.0317	0.0008166	-0.06051	0.001172	0.0636	5001	2000		pi.1[23168]	0.4999	0.1855	0.003779	0.06744	0.5274	0.7957	5001	2000
GRMZM2G010357	76	54	141	126		beta.i[28516]	0.002018	0.03197	0.0007663	-0.0607	0.001444	0.06388	5001	2000		pi.1[28516]	0.5209	0.2034	0.004144	0.06749	0.5481	0.8311	5001	2000
GRMZM2G176647	29	53	60	113		beta.i[12377]	0.0006042	0.03102	0.0007167	-0.06191	0.0008939	0.06058	5001	2000		pi.1[12377]	0.5756	0.2135	0.005312	0.06753	0.6152	0.8753	5001	2000
GRMZM2G002368	30	42	84	88		beta.i[3371]	0.001232	0.03184	0.0007199	-0.06035	0.001327	0.06302	5001	2000		pi.1[3371]	0.5612	0.2128	0.005312	0.06761	0.6032	0.8634	5001	2000
GRMZM2G065281	16	21	109	116		beta.i[4597]	3.048e-05	0.03054	0.0006323	-0.05861	-4.617e-05	0.06023	5001	2000		pi.1[4597]	0.5923	0.2256	0.005802	0.06761	0.6356	0.8997	5001	2000
GRMZM5G813055	173	44	115	259		beta.i[2621]	0.001584	0.03186	0.0006324	-0.0607	0.001	0.06543	5001	2000		pi.1[2621]	0.4908	0.186	0.004874	0.06768	0.5177	0.781	5001	2000
phyC2	7	11	100	167		beta.i[25561]	-0.0001213	0.03096	0.0006641	-0.06065	6.505e-05	0.0609	5001	2000		pi.1[25561]	0.6559	0.2383	0.005328	0.06771	0.7111	0.9497	5001	2000
GRMZM5G879280	17	50	65	81		beta.i[18914]	0.002364	0.0319	0.0006339	-0.05939	0.002189	0.06453	5001	2000		pi.1[18914]	0.5915	0.2243	0.004687	0.06772	0.6359	0.8975	5001	2000
GRMZM2G101105	34	61	83	90		beta.i[5297]	0.001985	0.03198	0.000673	-0.06101	0.002385	0.06467	5001	2000		pi.1[5297]	0.5571	0.2115	0.0049	0.0678	0.5934	0.8668	5001	2000
GRMZM2G162127	47	23	109	240		beta.i[30082]	0.001212	0.03127	0.0006068	-0.05882	0.001663	0.06398	5001	2000		pi.1[30082]	0.5448	0.2085	0.005868	0.0679	0.578	0.8455	5001	2000
GRMZM2G340307	61	66	153	81		beta.i[12700]	0.0005366	0.03201	0.0006292	-0.06176	0.000269	0.06356	5001	2000		pi.1[12700]	0.5412	0.1978	0.00408	0.06791	0.5723	0.8411	5001	2000
GRMZM2G076885	171	130	71	93		beta.i[24740]	0.001292	0.03121	0.0006546	-0.05792	0.001423	0.06359	5001	2000		pi.1[24740]	0.4905	0.1887	0.004328	0.06791	0.5145	0.7929	5001	2000
GRMZM2G526699	49	104	49	78		beta.i[27406]	0.002139	0.03207	0.0006337	-0.06263	0.002233	0.06425	5001	2000		pi.1[27406]	0.5455	0.2034	0.004597	0.06794	0.58	0.8419	5001	2000
GRMZM2G052544	15	3	400	473		beta.i[24404]	0.0007179	0.03218	0.0008795	-0.06239	0.001549	0.06402	5001	2000		pi.1[24404]	0.5948	0.2318	0.004921	0.06804	0.6396	0.9023	5001	2000
GRMZM2G157384	64	55	69	248		beta.i[21383]	0.0007955	0.0315	0.0007422	-0.05952	0.0008991	0.05985	5001	2000		pi.1[21383]	0.54	0.2025	0.004705	0.06805	0.5678	0.8402	5001	2000
GRMZM2G116004	60	101	71	138		beta.i[11491]	0.001788	0.03095	0.0007973	-0.05766	0.001926	0.06506	5001	2000		pi.1[11491]	0.5387	0.1984	0.00443	0.06806	0.5652	0.8393	5001	2000
GRMZM2G047546	47	26	170	166		beta.i[39737]	0.001839	0.03167	0.0006517	-0.05989	0.001773	0.06545	5001	2000		pi.1[39737]	0.5517	0.2028	0.003898	0.06807	0.5866	0.8514	5001	2000
GRMZM2G140070	5	28	59	110		beta.i[25727]	-6.285e-05	0.03238	0.0007712	-0.06112	-0.000423	0.0639	5001	2000		pi.1[25727]	0.6782	0.2446	0.006175	0.0681	0.7418	0.9662	5001	2000
AC194878.3_FG001	8	5	166	200		beta.i[39141]	0.001672	0.03162	0.000642	-0.05957	0.002079	0.06464	5001	2000		pi.1[39141]	0.6253	0.2389	0.00441	0.0681	0.6709	0.9421	5001	2000
GRMZM2G164062	2	8	59	278		beta.i[6509]	0.001052	0.03185	0.0007052	-0.06013	0.001623	0.06238	5001	2000		pi.1[6509]	0.7338	0.2529	0.006264	0.06821	0.8072	0.9933	5001	2000
GRMZM2G100333	136	53	174	192		beta.i[11243]	0.0007674	0.03165	0.0006775	-0.06203	0.00101	0.06171	5001	2000		pi.1[11243]	0.5142	0.1886	0.004657	0.06821	0.5412	0.796	5001	2000
GRMZM2G070356	35	34	149	95		beta.i[15799]	0.001522	0.03064	0.0006207	-0.05756	0.001105	0.06375	5001	2000		pi.1[15799]	0.5628	0.2109	0.005535	0.06822	0.5947	0.8683	5001	2000
GRMZM2G162290	5	10	112	191		beta.i[16953]	0.0008548	0.03174	0.0006235	-0.06157	0.0006396	0.06293	5001	2000		pi.1[16953]	0.6857	0.2436	0.005865	0.06825	0.749	0.9704	5001	2000
GRMZM5G871727	47	38	196	112		beta.i[23268]	0.001417	0.03163	0.0006355	-0.05981	0.002176	0.06164	5001	2000		pi.1[23268]	0.5554	0.2034	0.004681	0.06826	0.5912	0.8503	5001	2000
AC199782.5_FG001	188	31	254	322		beta.i[9511]	0.001637	0.03216	0.0007789	-0.06313	0.001369	0.06902	5001	2000		pi.1[9511]	0.4993	0.1837	0.004315	0.06827	0.518	0.7957	5001	2000
GRMZM2G141379	51	67	85	104		beta.i[6068]	0.001477	0.03155	0.000684	-0.0583	0.0006726	0.0629	5001	2000		pi.1[6068]	0.5458	0.2041	0.003955	0.06828	0.5782	0.8483	5001	2000
GRMZM2G045236	18	32	102	81		beta.i[28845]	0.001359	0.03146	0.0007618	-0.06281	0.001452	0.06107	5001	2000		pi.1[28845]	0.5946	0.2206	0.004907	0.06829	0.6393	0.8984	5001	2000
GRMZM2G180254	29	23	114	135		beta.i[1719]	0.001067	0.03213	0.0007352	-0.06564	0.001521	0.06417	5001	2000		pi.1[1719]	0.5566	0.2163	0.004295	0.0683	0.5951	0.8729	5001	2000
GRMZM2G111225	65	71	106	133		beta.i[20740]	0.002341	0.03218	0.0007774	-0.05992	0.002869	0.06635	5001	2000		pi.1[20740]	0.5443	0.197	0.004634	0.06833	0.5741	0.8421	5001	2000
GRMZM5G807602	14	18	92	219		beta.i[18528]	0.0003334	0.03195	0.0006834	-0.06304	-1.248e-05	0.06045	5001	2000		pi.1[18528]	0.6173	0.2264	0.004765	0.06835	0.6615	0.9161	5001	2000
GRMZM2G317900	91	20	244	281		beta.i[26409]	0.001868	0.03116	0.0006403	-0.05924	0.001586	0.06325	5001	2000		pi.1[26409]	0.5166	0.1974	0.0052	0.0684	0.5421	0.8214	5001	2000
GRMZM2G021912	206	54	101	138		beta.i[19593]	0.0005961	0.03138	0.0007545	-0.06198	0.001373	0.06251	5001	2000		pi.1[19593]	0.4787	0.1927	0.004175	0.06845	0.5041	0.7859	5001	2000
GRMZM2G033432	196	203	47	74		beta.i[35833]	0.002163	0.0316	0.0007479	-0.06213	0.001884	0.06448	5001	2000		pi.1[35833]	0.4818	0.1855	0.003135	0.06845	0.5064	0.7796	5001	2000
GRMZM2G154087	78	60	109	129		beta.i[6316]	0.001683	0.03167	0.0007431	-0.06275	0.001825	0.06197	5001	2000		pi.1[6316]	0.5284	0.2041	0.004891	0.06846	0.5641	0.836	5001	2000
GRMZM5G801307	4	2	524	354		beta.i[18494]	0.001053	0.03163	0.0008702	-0.06159	0.001087	0.06399	5001	2000		pi.1[18494]	0.6865	0.242	0.005527	0.06846	0.7432	0.9797	5001	2000
GRMZM2G124553	3	3	215	227		beta.i[36894]	0.0008217	0.03159	0.0006757	-0.06102	0.001088	0.06375	5001	2000		pi.1[36894]	0.7074	0.2482	0.005743	0.06848	0.7752	0.9877	5001	2000
GRMZM2G429442	5	10	121	168		beta.i[41536]	0.001049	0.03173	0.0006649	-0.05912	0.0009035	0.06314	5001	2000		pi.1[41536]	0.6781	0.2379	0.00539	0.06848	0.7306	0.9673	5001	2000
GRMZM5G853854	21	79	91	43		beta.i[14244]	-9.119e-05	0.03171	0.0008416	-0.06435	2.021e-05	0.06057	5001	2000		pi.1[14244]	0.5818	0.2149	0.004902	0.06851	0.6202	0.8885	5001	2000
GRMZM2G102404	38	44	80	113		beta.i[36644]	0.001975	0.03193	0.000689	-0.05903	0.001711	0.06435	5001	2000		pi.1[36644]	0.5615	0.2092	0.004288	0.06852	0.5966	0.8625	5001	2000
AC193645.3_FG008	104	117	52	112		beta.i[29]	0.0003175	0.03146	0.0006517	-0.05894	0.0002568	0.06123	5001	2000		pi.1[29]	0.5188	0.1928	0.004291	0.06854	0.5484	0.8182	5001	2000
GRMZM2G442685	27	44	138	70		beta.i[17972]	0.002131	0.03284	0.000779	-0.06435	0.003107	0.06638	5001	2000		pi.1[17972]	0.5793	0.2116	0.003992	0.06858	0.6198	0.8695	5001	2000
GRMZM2G082484	272	35	322	418		beta.i[4938]	0.003322	0.03285	0.0008291	-0.06275	0.002723	0.06828	5001	2000		pi.1[4938]	0.4905	0.1813	0.003988	0.06861	0.5165	0.7723	5001	2000
GRMZM2G021834	76	51	111	118		beta.i[10044]	0.001292	0.03238	0.0007164	-0.06142	0.0006778	0.0676	5001	2000		pi.1[10044]	0.5246	0.2019	0.004942	0.06863	0.5565	0.8351	5001	2000
GRMZM2G034157	150	72	114	82		beta.i[35846]	0.001394	0.03197	0.0007704	-0.05947	0.001937	0.06601	5001	2000		pi.1[35846]	0.4964	0.1925	0.004199	0.06872	0.5216	0.8012	5001	2000
GRMZM2G155370	1202	71	201	513		beta.i[21349]	0.002089	0.03148	0.0009283	-0.06182	0.002685	0.06314	5001	2000		pi.1[21349]	0.4462	0.1657	0.004454	0.06873	0.4622	0.7176	5001	2000
GRMZM2G079915	82	55	149	123		beta.i[4889]	0.001915	0.03245	0.0008078	-0.05951	0.001692	0.06735	5001	2000		pi.1[4889]	0.5266	0.1962	0.00352	0.06874	0.5541	0.8316	5001	2000
GRMZM2G175071	100	39	121	158		beta.i[37501]	0.0007169	0.03132	0.0007456	-0.06034	0.0005237	0.06117	5001	2000		pi.1[37501]	0.5087	0.1984	0.004071	0.06874	0.5374	0.8192	5001	2000
GRMZM2G375504	36	30	129	144		beta.i[37890]	0.001727	0.0312	0.0008822	-0.05825	0.001609	0.06664	5001	2000		pi.1[37890]	0.5626	0.2094	0.005282	0.06874	0.5977	0.8595	5001	2000
GRMZM2G166718	66	53	123	84		beta.i[12217]	0.0008564	0.03148	0.0007131	-0.06055	0.0006446	0.06277	5001	2000		pi.1[12217]	0.5239	0.2013	0.004499	0.0688	0.5547	0.8289	5001	2000
GRMZM2G069687	35	16	170	261		beta.i[36244]	0.0003337	0.03114	0.0008087	-0.06057	-0.0004817	0.06141	5001	2000		pi.1[36244]	0.5712	0.2149	0.004557	0.06884	0.6085	0.8781	5001	2000
GRMZM2G146847	42	56	80	162		beta.i[11905]	0.001399	0.03151	0.0007284	-0.06083	0.001041	0.06618	5001	2000		pi.1[11905]	0.5596	0.2085	0.00435	0.06889	0.5912	0.8581	5001	2000
GRMZM2G058197	15	33	82	133		beta.i[32578]	-2.537e-06	0.03169	0.0007187	-0.06237	-0.000698	0.06	5001	2000		pi.1[32578]	0.6078	0.2214	0.005265	0.06897	0.6505	0.9092	5001	2000
GRMZM2G138496	29	56	123	119		beta.i[16659]	0.002301	0.03171	0.0006674	-0.05782	0.002047	0.06355	5001	2000		pi.1[16659]	0.5821	0.2079	0.004691	0.06902	0.6157	0.8734	5001	2000
GRMZM2G448656	14	55	75	118		beta.i[41604]	0.0009096	0.03162	0.0006066	-0.05996	7.707e-05	0.06207	5001	2000		pi.1[41604]	0.6133	0.2238	0.005434	0.06904	0.6622	0.9097	5001	2000
GRMZM2G124880	40	36	82	111		beta.i[16479]	-0.0005138	0.03297	0.0009329	-0.06519	0.0007779	0.06452	5001	2000		pi.1[16479]	0.5517	0.2081	0.0047	0.06909	0.5831	0.8563	5001	2000
GRMZM2G102580	226	197	91	140		beta.i[16225]	0.001533	0.03128	0.000643	-0.05927	0.001962	0.06022	5001	2000		pi.1[16225]	0.4997	0.1826	0.004128	0.06912	0.523	0.7828	5001	2000
GRMZM2G374085	1231	126	136	55		beta.i[37883]	0.002119	0.0311	0.0008121	-0.0582	0.002242	0.06421	5001	2000		pi.1[37883]	0.4113	0.1628	0.003225	0.06919	0.4228	0.6948	5001	2000
GRMZM5G868816	31	173	76	23		beta.i[2801]	0.000649	0.03153	0.0007432	-0.05889	-7.301e-05	0.06295	5001	2000		pi.1[2801]	0.5522	0.2095	0.004705	0.06922	0.5845	0.8577	5001	2000
GRMZM5G883732	48	20	263	161		beta.i[14442]	0.002384	0.03161	0.0007401	-0.06066	0.001447	0.06583	5001	2000		pi.1[14442]	0.5418	0.1999	0.003717	0.06922	0.5722	0.8432	5001	2000
GRMZM2G120587	12	24	133	130		beta.i[5701]	0.001488	0.03217	0.0006683	-0.05974	0.0006767	0.06726	5001	2000		pi.1[5701]	0.6258	0.2239	0.004603	0.06927	0.6742	0.927	5001	2000
GRMZM5G871980	29	47	106	127		beta.i[28051]	0.0005045	0.03272	0.000575	-0.065	0.0008833	0.06186	5001	2000		pi.1[28051]	0.5744	0.2101	0.003926	0.06932	0.6156	0.8787	5001	2000
[truncated: 10,323 more rows]
