# Supplementary material for: Time Series Expression Analyses Using RNA-seq: A Statistical Approach
Source: Biomed Res Int. 2013 Mar 24;2013:203681. doi: 10.1155/2013/203681 (PMC3622290; doi:10.1155/2013/203681)
Supplement: Supplementary file 1 — Supplementary Table 1: Temporally differentially expressed gene sets detected by statistical evolutionary trajectory index (SETI) where the Benjamini-Hochberg FDR is controlled at < 0.05 in maize data Supplementary Table 2: Temporally differentially expressed gene sets detected by statistical evolutionary trajectory index (SETI) where the Benjamini-Hochberg FDR is controlled at < 0.05 in zebrafish data Supplementary Table 3: Temporally differentially expressed gene sets detected by Poisson AR(1) model in maize data Supplementary Table 4: Temporally differentially expressed gene sets detected by Poisson AR(1) model in zebrafish data [file 203681.f1.zip › SUPPLEMENTARY-DATA-JBB/SUPPLE-TABLE-4.xlsx]

## Sheet: Sheet1
transcriptID	2-4 cell	1000 cell	dome	shield	bud	28 hpf	48 hpf	5 dpf		node	mean	sd	MC error	0.025	median	0.975	start	sample		node	mean	sd	MC error	0.025	median	0.975	start	sample			node	mean	sd	MC error	0.025	median	0.975	start	sample
Zv9_00058229	1	1	1	42.7049	22.7482	14.7366	1	1		pi.1[8105]	0.5924	0.2704	0.00487	8.497e-05	0.6247	0.9814	3001	5000		beta.i[8105]	0.0001365	0.03117	0.0004475	-0.06037	0.0004972	0.06071	3001	5000
Zv9_00024990	1.10077	1.00807	1.58144	3.87681	6.78511	7.21799	6.46225	28.8154		pi.1[3458]	0.6888	0.276	0.006686	0.0001911	0.7633	0.9926	3001	5000		beta.i[3458]	0.0001761	0.03185	0.000417	-0.06304	-1.187e-05	0.06246	3001	5000
Zv9_00025518 Zv9_00025519	63.3717	22.6348	9.10745	2.71074	3.48334	4.05277	5.02788	8.17237		pi.1[3525]	0.4045	0.1892	0.002334	0.0003102	0.4234	0.7201	3001	5000		beta.i[3525]	0.003507	0.03084	0.0004887	-0.05803	0.003724	0.06343	3001	5000
Zv9_00047776 Zv9_00047777 Zv9_00047775 Zv9_00047774	26.646	16.3683	16.57	7.81761	2.49844	2.54397	2.84337	4.98089		pi.1[6661]	0.4589	0.2061	0.003466	0.0003797	0.4809	0.7936	3001	5000		beta.i[6661]	0.002668	0.03152	0.0004327	-0.05877	0.002606	0.06415	3001	5000
Zv9_00050972 Zv9_00050976 Zv9_00050974 Zv9_00050973	145.188	18.9806	18.6089	8.71393	2.64541	2.78898	3.01513	3.05277		pi.1[7113]	0.3725	0.1729	0.002959	0.000511	0.3852	0.6732	3001	5000		beta.i[7113]	0.002565	0.03138	0.0004524	-0.06022	0.002614	0.06353	3001	5000
Zv9_00049787 Zv9_00049788	1.75318	2.51863	12.0975	16.186	6.66188	3.62987	3.53475	3.21526		pi.1[6937]	0.6625	0.2654	0.006042	0.0005218	0.7183	0.9871	3001	5000		beta.i[6937]	0.001242	0.03179	0.0004581	-0.06232	0.0008769	0.06226	3001	5000
Zv9_00006117	1.02745	1.06836	1.13868	1.6613	7.84318	12.6327	12.4277	9.17871		pi.1[858]	0.6829	0.2679	0.0057	0.000563	0.7474	0.9905	3001	5000		beta.i[858]	-0.0001008	0.0316	0.0004905	-0.06177	8.081e-05	0.06253	3001	5000
Zv9_00037529	34.6422	16.8501	16.5625	8.74424	3.41165	1.90849	1.94195	1.79138		pi.1[5213]	0.4351	0.1994	0.003189	0.0007429	0.4524	0.7655	3001	5000		beta.i[5213]	0.001152	0.03116	0.000445	-0.06162	0.001905	0.06171	3001	5000
Zv9_00044566 Zv9_00044569 Zv9_00044567	1.07258	1.06287	1.12332	3.00845	4.55316	12.9857	12.6525	11.1595		pi.1[6193]	0.6823	0.2702	0.005935	0.0009729	0.7516	0.9903	3001	5000		beta.i[6193]	0.0004194	0.03115	0.0004245	-0.05905	8.509e-05	0.06205	3001	5000
Zv9_00037007	2.53225	3.14717	2.43546	1.52767	4.5297	12.1288	10.7312	12.6568		pi.1[5137]	0.6724	0.27	0.005927	0.001318	0.7444	0.9849	3001	5000		beta.i[5137]	0.0013	0.03203	0.0005302	-0.05969	0.001442	0.06376	3001	5000
Zv9_00043846 Zv9_00043840 Zv9_00043845 Zv9_00043843 Zv9_00043841 Zv9_00043842 Zv9_00043844	34.1862	36.8629	14.2218	12.8318	1	1	1	1		pi.1[6060]	0.4371	0.1977	0.003016	0.001596	0.4583	0.7612	3001	5000		beta.i[6060]	0.002355	0.03165	0.0004604	-0.05896	0.001987	0.06398	3001	5000
Zv9_00041444	13.8729	17.578	8.15749	5.22973	5.78848	3.36653	3.29924	3.0992		pi.1[5744]	0.5018	0.2214	0.003798	0.001796	0.5329	0.8455	3001	5000		beta.i[5744]	0.002796	0.03208	0.0004365	-0.05965	0.002329	0.06571	3001	5000
Zv9_00053736 Zv9_00053735	1.10738	1.06513	1.03675	1.02156	4.76162	18.3582	12.7689	8.76726		pi.1[7482]	0.6584	0.2722	0.006578	0.00187	0.719	0.9879	3001	5000		beta.i[7482]	-6.51e-05	0.0319	0.0004777	-0.06346	0.0004005	0.06281	3001	5000
Zv9_00043821 Zv9_00043819 Zv9_00043820	11.6707	34.3514	10.7651	4.56345	1.59182	3.18984	4.64448	7.13156		pi.1[6059]	0.5112	0.2264	0.003573	0.001918	0.5424	0.8523	3001	5000		beta.i[6059]	0.002229	0.03139	0.0004903	-0.06008	0.002754	0.06194	3001	5000
Zv9_00043302 Zv9_00043304 Zv9_00043303	51.5621	20.5998	14.4464	4.59829	3.53559	4.00433	4.08093	2.99313		pi.1[5983]	0.4214	0.1944	0.002976	0.002013	0.4424	0.7396	3001	5000		beta.i[5983]	0.002668	0.03186	0.0004468	-0.06002	0.002466	0.06624	3001	5000
Zv9_00010651 Zv9_00010650	85.4516	16.4433	5.26916	5.41025	4.34459	6.53174	6.6189	8.05438		pi.1[1534]	0.3929	0.1812	0.002716	0.002159	0.4097	0.697	3001	5000		beta.i[1534]	0.002213	0.03153	0.0005294	-0.06085	0.002318	0.06365	3001	5000
Zv9_00057342 Zv9_00057343 Zv9_00057344	32.5394	25.3797	15.8392	5.80199	1.49952	3.74414	3.8091	4.56603		pi.1[7951]	0.4464	0.1963	0.003314	0.002198	0.4632	0.7644	3001	5000		beta.i[7951]	0.002034	0.03191	0.000508	-0.06165	0.002422	0.06526	3001	5000
Zv9_00007451	1.0426	1.0496	1.03828	1.26916	3.54754	12.9165	15.9475	12.0949		pi.1[1048]	0.6818	0.2694	0.006017	0.002484	0.7502	0.9911	3001	5000		beta.i[1048]	0.000426	0.03206	0.0005314	-0.06319	0.0003923	0.06188	3001	5000
Zv9_00017202 Zv9_00017198 Zv9_00017200 Zv9_00017203 Zv9_00017204 Zv9_00017199	1.21669	1.07001	2.6748	1.73622	4.86156	10.2337	13.7584	14.3147		pi.1[2387]	0.6886	0.2691	0.006148	0.002539	0.7588	0.9915	3001	5000		beta.i[2387]	0.0003911	0.03107	0.0004862	-0.06185	0.0002837	0.06105	3001	5000
Zv9_00045296	1.17138	1.0196	1.75973	23.5094	2.93838	7.5474	11.2391	16.6301		pi.1[6312]	0.6539	0.2721	0.006676	0.002541	0.7152	0.9873	3001	5000		beta.i[6312]	-0.0002588	0.03188	0.000485	-0.06326	1.153e-05	0.06159	3001	5000
Zv9_00047517	2.47522	1.46655	36.9078	16.1519	5.00559	3.38541	4.03079	3.25426		pi.1[6630]	0.6279	0.269	0.005392	0.002622	0.6796	0.9824	3001	5000		beta.i[6630]	0.0005697	0.03134	0.0004258	-0.06272	0.0007191	0.06125	3001	5000
Zv9_00032059	1.14596	1.08299	1.76494	4.36575	3.6216	17.6308	11.3565	7.12677		pi.1[4458]	0.6692	0.2745	0.00631	0.002709	0.7355	0.9905	3001	5000		beta.i[4458]	0.0008863	0.03177	0.0004943	-0.06052	0.0004434	0.06236	3001	5000
Zv9_00015492 Zv9_00015491	1.08166	1.19573	3.69526	1.06706	1.5181	11.7371	19.4267	22.0294		pi.1[2139]	0.6732	0.2682	0.00532	0.003419	0.7388	0.989	3001	5000		beta.i[2139]	0.0007679	0.03141	0.0004475	-0.06113	0.0007423	0.06211	3001	5000
Zv9_00012962	81.3954	33.8412	19.3679	6.13656	1.16011	1.07454	1.07856	1.46723		pi.1[1822]	0.3871	0.1834	0.0026	0.003568	0.399	0.6993	3001	5000		beta.i[1822]	0.002793	0.03174	0.00052	-0.06021	0.002922	0.0642	3001	5000
Zv9_00030929 Zv9_00030928	100.45	15.0528	12.7043	6.75513	3.17337	5.35605	5.38571	7.32124		pi.1[4278]	0.393	0.1804	0.002896	0.003643	0.4081	0.6971	3001	5000		beta.i[4278]	0.003265	0.03204	0.00053	-0.05936	0.003138	0.06558	3001	5000
Zv9_00051432	1.10438	1.5245	1.77218	2.1212	1.39849	5.55797	15.9289	33.4052		pi.1[7173]	0.695	0.2717	0.005839	0.004043	0.7703	0.9931	3001	5000		beta.i[7173]	-0.0001693	0.03156	0.0005726	-0.06214	0.0001896	0.06209	3001	5000
Zv9_00035334 Zv9_00035335 Zv9_00035332 Zv9_00035333	34.038	11.2697	7.63403	5.95918	6.94181	6.00992	4.37229	3.47717		pi.1[4905]	0.4447	0.1992	0.003322	0.004129	0.4686	0.7674	3001	5000		beta.i[4905]	0.003048	0.03162	0.000423	-0.0588	0.002625	0.06689	3001	5000
Zv9_00011101 Zv9_00011099 Zv9_00011100	25.2685	7.99365	9.256	5.05135	3.95825	7.67187	8.01697	12.6325		pi.1[1595]	0.4843	0.2106	0.003072	0.004146	0.5126	0.8149	3001	5000		beta.i[1595]	0.002229	0.03176	0.0005236	-0.05909	0.001756	0.06386	3001	5000
Zv9_00027457	1	1	1	1	1.43496	41.4036	13.2587	23.7879		pi.1[3790]	0.6549	0.2712	0.006245	0.004167	0.7149	0.9875	3001	5000		beta.i[3790]	0.0002541	0.03131	0.0004515	-0.06173	0.0005663	0.06227	3001	5000
Zv9_00044961	175.608	22.3697	8.4691	6.58143	10.069	4.06584	5.0985	2.67989		pi.1[6255]	0.3723	0.1694	0.002598	0.004219	0.3838	0.6665	3001	5000		beta.i[6255]	0.002618	0.0317	0.000518	-0.06013	0.002918	0.06422	3001	5000
Zv9_00015955 Zv9_00015954 Zv9_00015953	41.5574	17.0408	7.81551	5.04109	5.4369	4.56848	4.40551	6.20445		pi.1[2207]	0.4385	0.1995	0.002741	0.004415	0.46	0.762	3001	5000		beta.i[2207]	0.002649	0.03211	0.0004536	-0.06026	0.00259	0.06471	3001	5000
Zv9_00010512	1.41447	1.3367	1.89553	2.33581	2.027	8.81916	12.6525	31.0743		pi.1[1513]	0.6978	0.2719	0.005684	0.004416	0.775	0.9906	3001	5000		beta.i[1513]	0.0006123	0.03197	0.0004543	-0.06193	0.0004616	0.06305	3001	5000
Zv9_00047988 Zv9_00047986 Zv9_00047987	12.4967	37.6809	23.2612	5.02727	1.02921	1.12746	1.95872	2.96716		pi.1[6693]	0.5077	0.2186	0.003729	0.004709	0.5356	0.8485	3001	5000		beta.i[6693]	0.001809	0.03138	0.0004186	-0.05853	0.00148	0.06569	3001	5000
Zv9_00040572	20.5365	9.36746	16.4913	17.2937	8.07044	1.16939	1.03872	1.0101		pi.1[5626]	0.4681	0.2084	0.003391	0.004746	0.4889	0.8028	3001	5000		beta.i[5626]	0.001909	0.03158	0.0005338	-0.05976	0.001978	0.06516	3001	5000
Zv9_00052597 Zv9_00052599 Zv9_00052598	1.57686	1.665	1.87611	1.55827	1.10217	6.44233	14.6739	40.7793		pi.1[7328]	0.6898	0.2762	0.005882	0.004765	0.7704	0.9926	3001	5000		beta.i[7328]	0.0007155	0.03186	0.0004967	-0.06139	0.0003382	0.06379	3001	5000
Zv9_00027204 Zv9_00027206 Zv9_00027203 Zv9_00027205	1.47712	1.9271	2.25425	11.704	8.05951	2.77264	5.73838	23.8612		pi.1[3767]	0.6814	0.2691	0.005963	0.004968	0.7494	0.9895	3001	5000		beta.i[3767]	0.0003975	0.03153	0.000465	-0.06154	0.0003027	0.06146	3001	5000
Zv9_00024320 Zv9_00024319 Zv9_00024321 Zv9_00024318	1.11536	1.29055	1.21739	1.60875	1.72253	11.6795	17.8171	17.0519		pi.1[3377]	0.6793	0.2719	0.005792	0.004999	0.7492	0.993	3001	5000		beta.i[3377]	0.001001	0.03159	0.0004933	-0.06084	0.0009681	0.0635	3001	5000
Zv9_00014344 Zv9_00014346 Zv9_00014345	1.02742	1.03772	1.24121	1.32365	1.76817	22.1877	17.5021	10.7893		pi.1[1991]	0.6616	0.2729	0.005858	0.005137	0.7217	0.9923	3001	5000		beta.i[1991]	4.844e-05	0.03149	0.0004951	-0.06343	-0.0004759	0.0614	3001	5000
Zv9_00006967	5.32124	3.64838	3.70066	2.82801	4.50626	5.36004	7.56268	36.0339		pi.1[977]	0.6191	0.2511	0.005065	0.005249	0.6727	0.9505	3001	5000		beta.i[977]	0.001972	0.03157	0.0005263	-0.05951	0.001784	0.0658	3001	5000
Zv9_00041021 Zv9_00041022 Zv9_00041024	13.1137	2.37931	386.401	34.0513	1.26431	1.203	1.06879	1.02851		pi.1[5687]	0.4444	0.2061	0.003036	0.005422	0.4593	0.7972	3001	5000		beta.i[5687]	0.002493	0.03142	0.0005741	-0.0589	0.002372	0.0639	3001	5000
Zv9_00006138 Zv9_00006139 Zv9_00006137	29.4354	16.201	11.1284	7.22238	2.14259	3.87275	4.44482	10.013		pi.1[861]	0.4581	0.2038	0.003257	0.005626	0.4829	0.7839	3001	5000		beta.i[861]	0.001942	0.03176	0.0005052	-0.05953	0.002187	0.06424	3001	5000
Zv9_00040362	1.01744	1.03076	1.04027	1.56197	2.24371	1.03655	11.5395	263.693		pi.1[5600]	0.7138	0.2705	0.005903	0.005629	0.793	0.9933	3001	5000		beta.i[5600]	-0.0001445	0.03148	0.0006292	-0.06138	0.0002858	0.06083	3001	5000
Zv9_00053636 Zv9_00053635 Zv9_00053634 Zv9_00053637	1	1	1	1	1.13384	11.0798	15.4558	26.7796		pi.1[7468]	0.671	0.2746	0.007354	0.005896	0.7361	0.9912	3001	5000		beta.i[7468]	0.0003503	0.03145	0.0004194	-0.06119	0.0001822	0.06422	3001	5000
Zv9_00011190 Zv9_00011191	46.959	23.7934	6.53461	1.68504	4.24598	7.245	7.33201	11.9933		pi.1[1601]	0.435	0.1913	0.003267	0.006121	0.4563	0.7524	3001	5000		beta.i[1601]	0.002821	0.03204	0.0005142	-0.06017	0.002963	0.06514	3001	5000
Zv9_00035179 Zv9_00035180	2.89767	2.43335	3.01093	4.00272	1.47184	13.481	17.7648	10.698		pi.1[4885]	0.6487	0.2663	0.004898	0.006464	0.7099	0.9824	3001	5000		beta.i[4885]	0.001511	0.03152	0.0003877	-0.06172	0.001803	0.06295	3001	5000
Zv9_00037627 Zv9_00037626 Zv9_00037628	4.01188	1.75145	1.68703	15.2393	14.126	5.23395	5.46828	10.5683		pi.1[5234]	0.626	0.258	0.005477	0.006564	0.6776	0.9702	3001	5000		beta.i[5234]	0.001327	0.03175	0.0005141	-0.05924	0.0005996	0.06445	3001	5000
Zv9_00052220 Zv9_00052216 Zv9_00052218 Zv9_00052217 Zv9_00052219	1.56049	1.49925	2.12798	1.8423	1.31659	14.0199	29.5775	11.1967		pi.1[7276]	0.6625	0.271	0.006948	0.006668	0.7273	0.9905	3001	5000		beta.i[7276]	0.001514	0.03147	0.000505	-0.06081	0.002209	0.06197	3001	5000
Zv9_00040744 Zv9_00040742 Zv9_00040746 Zv9_00040743 Zv9_00040745	1.25804	1.58482	1.38353	1.28084	1.85526	26.9859	21.1739	8.5236		pi.1[5650]	0.6629	0.2729	0.005892	0.006881	0.7263	0.9914	3001	5000		beta.i[5650]	0.0008942	0.03131	0.0003939	-0.05966	0.0006523	0.06257	3001	5000
Zv9_00036143	94.8274	30.8783	10.5989	4.94186	3.92459	3.92568	3.28321	2.75576		pi.1[5013]	0.3939	0.1821	0.003039	0.007032	0.4092	0.7016	3001	5000		beta.i[5013]	0.002395	0.03193	0.0005691	-0.05977	0.002096	0.06473	3001	5000
Zv9_00020986 Zv9_00020987 Zv9_00020984 Zv9_00020985	8.55732	11.7113	19.1208	9.59096	1.80248	4.37469	3.98313	2.40883		pi.1[2926]	0.5386	0.2307	0.003988	0.007203	0.5735	0.8836	3001	5000		beta.i[2926]	0.001016	0.03199	0.0004753	-0.0619	0.0005234	0.06366	3001	5000
Zv9_00034244	8.19428	9.48511	15.7237	24.921	3.66325	1.19514	1.32086	2.92399		pi.1[4770]	0.5333	0.2329	0.004249	0.007342	0.566	0.8883	3001	5000		beta.i[4770]	0.00257	0.03164	0.0004739	-0.06184	0.003097	0.06282	3001	5000
Zv9_00021394 Zv9_00021393	10.9816	20.7787	13.2878	3.60263	1.6498	3.10912	4.62081	6.9976		pi.1[2981]	0.5173	0.2219	0.003562	0.007482	0.5463	0.8564	3001	5000		beta.i[2981]	0.00223	0.03155	0.0003675	-0.06005	0.002375	0.06229	3001	5000
Zv9_00057218 Zv9_00057217 Zv9_00057219	28.8482	14.1357	15.2988	16.6102	2.97652	1.71366	1.14017	1.13184		pi.1[7921]	0.4494	0.201	0.002883	0.007523	0.4712	0.7782	3001	5000		beta.i[7921]	0.003568	0.03116	0.0005097	-0.05776	0.003082	0.0656	3001	5000
Zv9_00056133	51.0689	16.5353	23.3444	9.63548	1.20917	2.89365	2.80917	6.81269		pi.1[7778]	0.4181	0.1885	0.002982	0.007574	0.4362	0.7352	3001	5000		beta.i[7778]	0.001941	0.03144	0.0004896	-0.06009	0.002202	0.06357	3001	5000
Zv9_00022679 Zv9_00022681 Zv9_00022680	49.4442	22.1599	13.6622	6.07773	1.50203	5.09252	7.55978	2.86276		pi.1[3146]	0.4261	0.1908	0.003133	0.007585	0.4445	0.7438	3001	5000		beta.i[3146]	0.002706	0.03101	0.0004968	-0.05961	0.002804	0.06258	3001	5000
Zv9_00013236 Zv9_00013239 Zv9_00013238 Zv9_00013240	36.3329	31.4373	19.7987	3.69104	2.54324	3.82745	2.53835	1.55082		pi.1[1851]	0.4416	0.1932	0.003065	0.007652	0.4591	0.7548	3001	5000		beta.i[1851]	0.002047	0.03164	0.0004996	-0.05955	0.00171	0.06503	3001	5000
Zv9_00032601 Zv9_00032598 Zv9_00032595 Zv9_00032594 Zv9_00032599 Zv9_00032600 Zv9_00032597 Zv9_00032596 Zv9_00032602	1.14281	1.06736	1.12053	1.96821	15.4682	9.7797	12.0265	6.69823		pi.1[4518]	0.6596	0.2696	0.005662	0.007902	0.7221	0.9888	3001	5000		beta.i[4518]	0.0003664	0.03212	0.0004608	-0.063	-6.786e-05	0.06403	3001	5000
Zv9_00003222 Zv9_00003226 Zv9_00003225 Zv9_00003224 Zv9_00003223	39.1378	37.1379	12.5372	6.90867	1	1	1	1		pi.1[465]	0.4319	0.1898	0.003095	0.008031	0.4505	0.7416	3001	5000		beta.i[465]	0.001965	0.03135	0.0005268	-0.05774	0.002072	0.06508	3001	5000
Zv9_00047684 Zv9_00047683 Zv9_00047682	1.15103	1.17981	1.26796	2.59957	1.4787	8.42832	12.539	58.1065		pi.1[6651]	0.7032	0.2726	0.006245	0.008315	0.7852	0.9917	3001	5000		beta.i[6651]	0.000594	0.032	0.0004329	-0.06268	0.0003298	0.0621	3001	5000
Zv9_00027805 Zv9_00027804 Zv9_00027806	44.3483	15.5456	6.14748	4.36776	5.33897	7.28055	5.08638	7.94638		pi.1[3838]	0.4364	0.1942	0.003214	0.008371	0.457	0.7558	3001	5000		beta.i[3838]	0.003984	0.03136	0.0005025	-0.05898	0.003644	0.06525	3001	5000
Zv9_00047637 Zv9_00047636	1.12704	1	1.1729	1.04279	1.82675	1	65.2029	62.4872		pi.1[6644]	0.6739	0.2724	0.00577	0.008511	0.7388	0.9898	3001	5000		beta.i[6644]	-7.071e-05	0.03104	0.0005214	-0.06085	0.0002646	0.06072	3001	5000
Zv9_00030249 Zv9_00030250	1.44258	1.23068	1.17002	1.00835	1.08282	4.28766	16.5875	53.2545		pi.1[4180]	0.6971	0.268	0.005775	0.008784	0.7699	0.9936	3001	5000		beta.i[4180]	0.001659	0.0323	0.0005361	-0.06127	0.00176	0.06531	3001	5000
Zv9_00027690 Zv9_00027688 Zv9_00027691 Zv9_00027689	43.366	17.7235	5.17296	2.85843	3.47514	10.0407	7.1336	12.9764		pi.1[3821]	0.4409	0.1955	0.003096	0.009225	0.463	0.7608	3001	5000		beta.i[3821]	0.003022	0.03174	0.0004909	-0.0616	0.003132	0.06707	3001	5000
Zv9_00052727	1	1	1.12444	1.36285	1.49234	6.73716	14.2608	42.4968		pi.1[7348]	0.6933	0.2709	0.005975	0.009235	0.77	0.9906	3001	5000		beta.i[7348]	0.0006358	0.03166	0.0005089	-0.06121	0.0008447	0.06322	3001	5000
Zv9_00031138	1	1	1	1	1.6892	12.3069	13.1603	32.3603		pi.1[4301]	0.6865	0.2703	0.005866	0.009298	0.7599	0.9922	3001	5000		beta.i[4301]	6.495e-05	0.03107	0.0005046	-0.06057	0.0004027	0.06163	3001	5000
Zv9_00018618 Zv9_00018611 Zv9_00018612 Zv9_00018615 Zv9_00018608 Zv9_00018613 Zv9_00018620 Zv9_00018619 Zv9_00018614 Zv9_00018624 Zv9_00018621 Zv9_00018617 Zv9_00018616 Zv9_00018623 Zv9_00018609	2.66329	1	1	4.38544	3.47573	9.1941	11.1153	25.0364		pi.1[2589]	0.6737	0.2684	0.005622	0.009316	0.7426	0.9867	3001	5000		beta.i[2589]	0.00135	0.03197	0.0004611	-0.06229	0.001398	0.06435	3001	5000
Zv9_00058407	13.0619	16.0743	14.5847	4.6233	5.70323	3.77281	3.08397	2.50153		pi.1[8125]	0.514	0.2222	0.004134	0.009478	0.5454	0.8512	3001	5000		beta.i[8125]	0.003141	0.03146	0.000425	-0.05816	0.003282	0.06382	3001	5000
Zv9_00020563 Zv9_00020560 Zv9_00020559 Zv9_00020561	1.87737	2.64752	2.12855	1.59376	8.85417	10.917	11.6186	6.75239		pi.1[2871]	0.6557	0.2736	0.005516	0.009664	0.7158	0.9878	3001	5000		beta.i[2871]	0.0008999	0.03192	0.0005063	-0.06355	0.0007605	0.0646	3001	5000
Zv9_00046612 Zv9_00046613	1.08775	1.24726	1.67335	1.93067	1.97637	18.6451	16.0137	14.1022		pi.1[6494]	0.6737	0.2703	0.006541	0.009801	0.7417	0.9909	3001	5000		beta.i[6494]	0.0008442	0.03177	0.0005391	-0.06158	0.001076	0.0625	3001	5000
Zv9_00023517 Zv9_00023516 Zv9_00023515	1.05301	1.17969	1.14189	1.29193	8.48459	15.9872	12.3266	7.84776		pi.1[3265]	0.6678	0.2685	0.0054	0.009872	0.7292	0.9908	3001	5000		beta.i[3265]	0.001242	0.03151	0.0004235	-0.06079	0.001306	0.0626	3001	5000
Zv9_00034624 Zv9_00034625 Zv9_00034626 Zv9_00034623	1.28126	1.76055	2.92036	1.46993	11.9457	13.1749	10.8288	7.45391		pi.1[4813]	0.6819	0.2725	0.006397	0.009879	0.7549	0.9909	3001	5000		beta.i[4813]	0.0009857	0.0317	0.0004961	-0.06101	0.0003614	0.06261	3001	5000
Zv9_00045458	1	1.00982	1.00868	1	2.88702	17.0301	18.1161	13.1978		pi.1[6342]	0.6794	0.2602	0.005705	0.00988	0.7382	0.9882	3001	5000		beta.i[6342]	0.0005596	0.03122	0.0005038	-0.06017	0.0005303	0.06222	3001	5000
Zv9_00000653	1	1.07454	1.1036	1.01427	1.47747	18.9438	16.5475	19.3601		pi.1[101]	0.6753	0.2667	0.006414	0.01013	0.7384	0.9892	3001	5000		beta.i[101]	0.0003737	0.03193	0.0004181	-0.06236	0.0006801	0.06223	3001	5000
Zv9_00044673	1.08247	1.233	1.27336	1.51326	3.22349	7.62581	15.6625	25.8341		pi.1[6209]	0.6968	0.2685	0.005821	0.01016	0.7722	0.9931	3001	5000		beta.i[6209]	0.0003896	0.03148	0.0004622	-0.06168	0.0006982	0.06163	3001	5000
Zv9_00027446 Zv9_00027444 Zv9_00027445	1.58937	1.93177	1.8406	2.00134	8.89868	10.7202	10.3152	9.4734		pi.1[3789]	0.6825	0.2677	0.005079	0.01029	0.7448	0.9896	3001	5000		beta.i[3789]	0.001339	0.03138	0.0004788	-0.06007	0.001832	0.06263	3001	5000
Zv9_00016943 Zv9_00016942	5.06129	6.33685	1.88631	2.29531	9.12342	6.97771	7.31362	17.7829		pi.1[2352]	0.609	0.2515	0.005022	0.01044	0.6594	0.9468	3001	5000		beta.i[2352]	0.0009546	0.03136	0.0004001	-0.06064	0.0009544	0.06189	3001	5000
Zv9_00053554 Zv9_00053555	1	1	1.02838	1.78708	27.5165	31.699	6.16818	2.54517		pi.1[7456]	0.6305	0.266	0.005176	0.01051	0.6813	0.9845	3001	5000		beta.i[7456]	-0.0001061	0.03178	0.0004687	-0.06297	-0.000351	0.06113	3001	5000
Zv9_00023872 Zv9_00023891	8.21583	7.85065	26.2656	1	7.42437	7.48003	8.1728	9.62797		pi.1[3317]	0.5323	0.2325	0.003827	0.01053	0.565	0.8822	3001	5000		beta.i[3317]	0.002045	0.03123	0.0004256	-0.06059	0.002052	0.0628	3001	5000
Zv9_00029151	1.05027	1.0364	1.04006	1.25112	1.73341	8.9437	23.8639	18.8694		pi.1[4020]	0.6816	0.2716	0.006545	0.01062	0.7509	0.9906	3001	5000		beta.i[4020]	0.0008785	0.03146	0.0004718	-0.0613	0.0007188	0.06224	3001	5000
Zv9_00058673	29.516	23.5231	23.2196	20.79	1	1	1	1		pi.1[8163]	0.4536	0.1971	0.002854	0.01069	0.4764	0.7691	3001	5000		beta.i[8163]	0.002254	0.03134	0.0004724	-0.06039	0.002558	0.06353	3001	5000
Zv9_00010282	1.5062	1.16828	13.8511	31.7475	8.58175	3.20485	2.5804	1.80307		pi.1[1495]	0.6435	0.2668	0.005832	0.01118	0.6966	0.9857	3001	5000		beta.i[1495]	0.0003321	0.03059	0.0004945	-0.05939	0.0005578	0.05985	3001	5000
Zv9_00002642	1	1	1.34875	1.46933	1.71629	13.8944	15.4042	23.4918		pi.1[375]	0.6907	0.269	0.00668	0.0112	0.759	0.9927	3001	5000		beta.i[375]	0.00119	0.03106	0.0004751	-0.05954	0.001071	0.06137	3001	5000
Zv9_00007858 Zv9_00007859	1	1.00301	1.66973	18.2154	20.2523	6.78797	4.15616	3.654		pi.1[1101]	0.6467	0.2695	0.005684	0.01128	0.7023	0.9879	3001	5000		beta.i[1101]	-0.0005673	0.03175	0.0005019	-0.06367	-0.0003396	0.06169	3001	5000
Zv9_00025508 Zv9_00025507 Zv9_00025506 Zv9_00025509	9.79205	31.0599	10.4999	4.45331	3.3471	3.35267	3.65357	4.30057		pi.1[3521]	0.5363	0.2245	0.003998	0.01134	0.5652	0.874	3001	5000		beta.i[3521]	0.002132	0.03162	0.0004768	-0.05926	0.001473	0.06497	3001	5000
Zv9_00018353	25.5552	17.1164	6.00265	3.97745	7.13589	5.33098	4.97114	4.5504		pi.1[2555]	0.4626	0.2036	0.00368	0.01143	0.4862	0.792	3001	5000		beta.i[2555]	0.001838	0.03194	0.000537	-0.06119	0.002177	0.06437	3001	5000
Zv9_00053994	1	1.00496	1.0703	1.02143	1.19505	8.69514	20.9522	23.8023		pi.1[7519]	0.6741	0.2697	0.006581	0.01163	0.7424	0.9901	3001	5000		beta.i[7519]	0.0003549	0.0319	0.0005151	-0.06272	0.0002182	0.06399	3001	5000
Zv9_00039499 Zv9_00039498	1	21.903	1	10.761	9.98173	10.8921	9.58589	10.5936		pi.1[5488]	0.6476	0.2656	0.005216	0.01185	0.706	0.9868	3001	5000		beta.i[5488]	0.001237	0.03223	0.0005021	-0.0618	0.0006843	0.06456	3001	5000
Zv9_00014509 Zv9_00014508	128.684	27.3759	20.5918	16.5355	1.49614	1.25138	1.53321	2.05364		pi.1[2012]	0.3775	0.173	0.002859	0.012	0.3929	0.6793	3001	5000		beta.i[2012]	0.002584	0.032	0.0005588	-0.05881	0.002228	0.0662	3001	5000
Zv9_00019077	1	1	1	1	2.819	28.3276	16.533	8.40214		pi.1[2651]	0.6499	0.2703	0.00566	0.01201	0.7068	0.986	3001	5000		beta.i[2651]	0.0001828	0.03162	0.0004714	-0.06052	0.0005306	0.0618	3001	5000
Zv9_00028705	1	1.00281	1.09894	1.01184	1.03452	5.69545	17.8538	41.7916		pi.1[3967]	0.6968	0.2672	0.005169	0.01217	0.7721	0.9926	3001	5000		beta.i[3967]	0.0008476	0.03182	0.0005163	-0.05961	0.0004043	0.06484	3001	5000
Zv9_00009267	1.01972	1.04508	1.50218	16.4029	16.1265	6.97774	4.75731	5.1698		pi.1[1330]	0.6547	0.2651	0.004988	0.01238	0.7114	0.9886	3001	5000		beta.i[1330]	0.0003757	0.03098	0.0004438	-0.06	0.0002143	0.0612	3001	5000
Zv9_00035128 Zv9_00035127	1.02231	1.02172	1.02181	1.02304	1.17845	5.22113	13.954	51.2891		pi.1[4877]	0.6916	0.2724	0.006773	0.01256	0.7692	0.9926	3001	5000		beta.i[4877]	-0.0006488	0.03093	0.0004829	-0.05977	-0.0009522	0.05963	3001	5000
Zv9_00041472	76.6255	16.6425	5.45947	4.02901	8.42162	6.42663	5.05731	11.729		pi.1[5748]	0.4102	0.1863	0.002888	0.0127	0.4242	0.7213	3001	5000		beta.i[5748]	0.003017	0.03152	0.0006019	-0.0588	0.002183	0.06539	3001	5000
Zv9_00055395 Zv9_00055396	15.5508	8.71389	11.7792	9.20364	2.48368	26.3867	8.86083	1.19888		pi.1[7687]	0.4921	0.2119	0.003466	0.01317	0.5154	0.826	3001	5000		beta.i[7687]	0.002402	0.03142	0.0004483	-0.05883	0.002301	0.06305	3001	5000
Zv9_00039884 Zv9_00039883	1.08876	1.01973	1.2549	11.1508	26.4719	6.87653	5.35576	3.65338		pi.1[5532]	0.6519	0.2674	0.005659	0.01338	0.7079	0.9881	3001	5000		beta.i[5532]	0.001284	0.03154	0.0004159	-0.05894	0.000714	0.06441	3001	5000
Zv9_00045355 Zv9_00045354	3.48852	2.55277	2.749	2.00227	3.68483	11.5907	11.5141	13.2715		pi.1[6321]	0.6563	0.2609	0.005838	0.01344	0.7164	0.98	3001	5000		beta.i[6321]	0.0007491	0.03118	0.0004255	-0.05959	0.0004093	0.06187	3001	5000
Zv9_00054448 Zv9_00054447 Zv9_00054449	2.62393	1.15642	1.3549	2.34482	44.9006	10.5323	7.83213	7.23624		pi.1[7563]	0.6372	0.2643	0.006083	0.01349	0.6933	0.9804	3001	5000		beta.i[7563]	0.001285	0.03117	0.0005125	-0.05911	0.001491	0.06194	3001	5000
Zv9_00021603 Zv9_00021601 Zv9_00021602	53.2807	8.71006	6.33749	9.45187	7.43089	5.87095	5.73441	9.59921		pi.1[3010]	0.4258	0.1878	0.003092	0.01364	0.4454	0.7345	3001	5000		beta.i[3010]	0.003024	0.03152	0.0005408	-0.05815	0.002997	0.06314	3001	5000
Zv9_00028814	13.8501	8.09736	16.4293	11.2796	3.82951	3.79926	3.17904	3.09901		pi.1[3983]	0.5065	0.2159	0.00354	0.01379	0.5352	0.8358	3001	5000		beta.i[3983]	0.002057	0.03118	0.0004174	-0.06036	0.001987	0.06322	3001	5000
Zv9_00001998 Zv9_00002002 Zv9_00002000 Zv9_00001997 Zv9_00001999 Zv9_00002001 Zv9_00001996	1.03424	1.01642	1.05526	1.76988	7.62873	7.86071	12.7737	11.3133		pi.1[280]	0.6801	0.2731	0.005831	0.01383	0.7533	0.9902	3001	5000		beta.i[280]	0.000636	0.03182	0.0005031	-0.06108	0.0004864	0.06289	3001	5000
Zv9_00028339	1.01033	1.15856	1.15891	1.07113	3.91732	22.3195	20.7983	6.75987		pi.1[3916]	0.6663	0.2699	0.005821	0.01394	0.7319	0.9922	3001	5000		beta.i[3916]	0.0008688	0.03116	0.0005114	-0.06188	0.001016	0.06195	3001	5000
Zv9_00015450 Zv9_00015448 Zv9_00015447 Zv9_00015449	1	1.00764	1.08118	1.96805	9.48071	14.1331	10.6107	7.84854		pi.1[2131]	0.6713	0.2705	0.005518	0.01444	0.7396	0.9908	3001	5000		beta.i[2131]	0.001215	0.03173	0.0004746	-0.05971	0.001454	0.06489	3001	5000
Zv9_00025781 Zv9_00025779 Zv9_00025780 Zv9_00025777 Zv9_00025778	22.5012	17.6378	17.945	15.3281	3.35448	1	1	1		pi.1[3560]	0.4733	0.2015	0.004008	0.01446	0.497	0.7952	3001	5000		beta.i[3560]	0.001479	0.03153	0.000466	-0.05923	0.001246	0.06382	3001	5000
Zv9_00050320 Zv9_00050322 Zv9_00050325 Zv9_00050323 Zv9_00050321 Zv9_00050324 Zv9_00050319 Zv9_00050326	26.3971	16.1134	26.2856	26.8198	1	1	1	1		pi.1[7020]	0.4574	0.1983	0.00252	0.01478	0.4769	0.7804	3001	5000		beta.i[7020]	0.001004	0.03166	0.0004673	-0.06087	0.001494	0.06295	3001	5000
Zv9_00057514	57.2629	13.9369	8.87949	21.6221	8.8839	2.03896	1.71263	2.10561		pi.1[7987]	0.4149	0.1857	0.002955	0.01479	0.4315	0.7295	3001	5000		beta.i[7987]	0.003327	0.03134	0.0006101	-0.05637	0.003277	0.06419	3001	5000
Zv9_00052680 Zv9_00052681 Zv9_00052679	1	1	1	1	6.96144	18.1253	13.2295	10.3159		pi.1[7342]	0.6722	0.2651	0.006658	0.01484	0.7342	0.9927	3001	5000		beta.i[7342]	0.001335	0.03225	0.0004678	-0.0611	0.001479	0.06437	3001	5000
Zv9_00020015 Zv9_00020014	1.83581	4.22961	2.70809	2.35745	2.67572	9.27151	11.6023	12.4094		pi.1[2772]	0.6747	0.2693	0.006487	0.01491	0.74	0.9899	3001	5000		beta.i[2772]	0.001834	0.03151	0.00049	-0.05938	0.001224	0.06371	3001	5000
Zv9_00003129 Zv9_00003130	1.53499	2.70726	2.31729	1.30242	1.30237	12.0449	16.0646	23.4652		pi.1[449]	0.6982	0.264	0.006159	0.01507	0.7717	0.9896	3001	5000		beta.i[449]	0.001	0.03169	0.0005564	-0.05952	0.000908	0.06415	3001	5000
Zv9_00017049 Zv9_00017048	25.8751	7.56402	4.76691	4.68327	4.76112	10.4668	9.7452	13.5035		pi.1[2371]	0.4805	0.2069	0.002916	0.01514	0.5084	0.7995	3001	5000		beta.i[2371]	0.002366	0.03082	0.0004174	-0.05815	0.00231	0.06324	3001	5000
Zv9_00001048 Zv9_00001047	1	1	1	1.01845	13.5208	18.8845	16.5608	4.51981		pi.1[155]	0.6629	0.2662	0.004887	0.01528	0.7199	0.9896	3001	5000		beta.i[155]	0.001133	0.03164	0.0004625	-0.06075	0.0008419	0.06352	3001	5000
Zv9_00015005 Zv9_00015006	1.27346	1.16095	1.56661	1.94372	2.45	5.6242	13.2463	36.8449		pi.1[2081]	0.7115	0.2723	0.00684	0.01549	0.7956	0.9937	3001	5000		beta.i[2081]	0.0002584	0.03137	0.0004819	-0.06126	0.000406	0.06231	3001	5000
Zv9_00023473 Zv9_00023471 Zv9_00023472	22.3143	15.0839	10.8748	2.9199	5.65332	5.45079	4.97649	8.00414		pi.1[3256]	0.4844	0.2076	0.003278	0.01567	0.51	0.8072	3001	5000		beta.i[3256]	0.00204	0.03172	0.000404	-0.06054	0.002078	0.06518	3001	5000
Zv9_00036747 Zv9_00036748 Zv9_00036746	2.81709	3.70961	4.38167	2.07254	4.42817	23.6562	11.5082	3.38591		pi.1[5100]	0.6337	0.2605	0.004683	0.01571	0.6804	0.9799	3001	5000		beta.i[5100]	0.001134	0.03165	0.0004707	-0.0624	0.001448	0.06263	3001	5000
Zv9_00039398 Zv9_00039399 Zv9_00039397	32.4462	77.6649	23.2586	1	1	1	1	1		pi.1[5473]	0.4293	0.1959	0.002876	0.01597	0.4454	0.7628	3001	5000		beta.i[5473]	0.002168	0.03157	0.0004372	-0.05894	0.002194	0.06314	3001	5000
Zv9_00005155 Zv9_00005153 Zv9_00005154	33.2731	22.7071	16.0119	8.13425	3.06197	2.77538	2.06424	2.40174		pi.1[741]	0.4507	0.196	0.00323	0.01609	0.4739	0.7706	3001	5000		beta.i[741]	0.003189	0.03148	0.0004404	-0.05845	0.003084	0.06463	3001	5000
Zv9_00003029	89.644	38.4135	15.1276	5.51124	2.69869	1.68211	1.36814	1.75684		pi.1[432]	0.3986	0.1773	0.002944	0.01618	0.4177	0.6943	3001	5000		beta.i[432]	0.001467	0.03173	0.0004803	-0.06071	0.001774	0.06448	3001	5000
Zv9_00003470	1.30126	1.66964	1.99125	2.04997	3.40573	5.60345	8.52107	68.0836		pi.1[500]	0.7214	0.2663	0.006516	0.01626	0.7977	0.9925	3001	5000		beta.i[500]	0.0004234	0.03135	0.0004674	-0.06056	0.0001508	0.06266	3001	5000
Zv9_00029878	4.8523	11.7596	12.5491	12.7086	15.0524	1	3.37599	1		pi.1[4133]	0.5774	0.2441	0.004084	0.01645	0.6134	0.9392	3001	5000		beta.i[4133]	0.001849	0.03199	0.0005612	-0.06063	0.001984	0.06405	3001	5000
Zv9_00053501	20.1873	10.8565	13.3235	8.58545	3.27685	3.27483	3.71708	6.50611		pi.1[7447]	0.4823	0.2091	0.003223	0.01649	0.5063	0.8036	3001	5000		beta.i[7447]	0.00221	0.03134	0.0004912	-0.05813	0.002061	0.06354	3001	5000
Zv9_00039911 Zv9_00039916 Zv9_00039915 Zv9_00039912 Zv9_00039914 Zv9_00039917 Zv9_00039913 Zv9_00039918 Zv9_00039910	102.683	1	122.221	80.3873	21.6696	1	17.5984	3.80112		pi.1[5535]	0.3682	0.1679	0.003146	0.01651	0.3799	0.6681	3001	5000		beta.i[5535]	0.004621	0.03117	0.0006471	-0.05705	0.004681	0.06546	3001	5000
Zv9_00029167 Zv9_00029166 Zv9_00029165	1	8.5618	13.631	11.1367	7.36443	3.6738	2.63263	2.00295		pi.1[4024]	0.6761	0.263	0.006183	0.01663	0.7372	0.9906	3001	5000		beta.i[4024]	0.0007	0.03188	0.0004749	-0.06081	0.0003594	0.06519	3001	5000
Zv9_00022595 Zv9_00022593 Zv9_00022594	32.7242	17.0404	21.8435	11.0877	1.93739	2.70125	2.73832	3.99304		pi.1[3129]	0.4568	0.1966	0.003198	0.01667	0.4778	0.7749	3001	5000		beta.i[3129]	0.003252	0.03216	0.0004273	-0.0599	0.003437	0.06589	3001	5000
Zv9_00049726	1.36702	1.67226	10.534	12.3168	7.2743	4.82703	4.60826	3.66364		pi.1[6930]	0.6678	0.271	0.005179	0.01675	0.7327	0.9891	3001	5000		beta.i[6930]	0.0007606	0.03173	0.0004268	-0.06166	0.000814	0.06196	3001	5000
Zv9_00053648 Zv9_00053649 Zv9_00053647	1	1	1.25389	1.27042	8.1415	14.2018	12.143	8.95835		pi.1[7469]	0.6759	0.2662	0.005797	0.01677	0.7375	0.9917	3001	5000		beta.i[7469]	0.0006946	0.0314	0.0004393	-0.06039	0.0009941	0.06178	3001	5000
Zv9_00004456	1.20115	1.17329	1.10306	1.13027	1.34847	7.72269	19.5119	30.4691		pi.1[640]	0.6819	0.271	0.006395	0.01685	0.757	0.9916	3001	5000		beta.i[640]	0.0004058	0.03181	0.0005123	-0.06185	0.0009262	0.06134	3001	5000
Zv9_00026767	1.46831	1.12975	1.19497	1.12324	1.51475	46.3663	98.7158	2.59995		pi.1[3691]	0.6011	0.2615	0.004241	0.01705	0.6298	0.9841	3001	5000		beta.i[3691]	0.001077	0.03183	0.0005274	-0.06132	0.00148	0.06214	3001	5000
Zv9_00040034	4.4442	1	1	1	1	44.6921	15.5129	56.7818		pi.1[5549]	0.6245	0.2461	0.004434	0.01714	0.6692	0.961	3001	5000		beta.i[5549]	0.001598	0.03201	0.0005443	-0.06172	0.001737	0.06398	3001	5000
Zv9_00049264	1.10109	1.00538	1.21592	22.6734	38.1697	6.38526	3.49502	2.50271		pi.1[6879]	0.6336	0.2662	0.005478	0.01718	0.6792	0.9872	3001	5000		beta.i[6879]	0.0004684	0.03181	0.0004797	-0.06192	0.0002625	0.06318	3001	5000
Zv9_00003463 Zv9_00003464	1.27608	1.15783	1.2987	1.90646	2.81675	11.4436	14.3086	16.8469		pi.1[499]	0.6889	0.2677	0.005908	0.01735	0.7623	0.991	3001	5000		beta.i[499]	0.00131	0.03183	0.0004807	-0.06116	0.001132	0.06179	3001	5000
Zv9_00058704	1	1	1	1	3.03015	17.366	17.3885	9.43946		pi.1[8171]	0.6517	0.2664	0.005324	0.01745	0.7089	0.9849	3001	5000		beta.i[8171]	0.0007247	0.03171	0.0004907	-0.06152	0.0005387	0.06355	3001	5000
Zv9_00016195 Zv9_00016193 Zv9_00016194	1.72655	1.34593	5.62227	6.54575	5.1179	6.10842	6.31719	20.5366		pi.1[2247]	0.7015	0.2632	0.005997	0.0176	0.772	0.9929	3001	5000		beta.i[2247]	0.0008637	0.03138	0.0004438	-0.05966	0.0007919	0.06202	3001	5000
Zv9_00035916 Zv9_00035914 Zv9_00035917 Zv9_00035918 Zv9_00035915	1.23945	3.42294	5.78771	19.6853	38.8165	2.13636	1.58685	4.7624		pi.1[4984]	0.6451	0.2683	0.005064	0.0176	0.6932	0.9883	3001	5000		beta.i[4984]	0.001641	0.03125	0.0003897	-0.05854	0.001888	0.06309	3001	5000
Zv9_00048519	1.05716	1.00513	2.87661	6.40916	12.3772	8.68762	8.04868	5.42928		pi.1[6780]	0.6821	0.2634	0.005748	0.01766	0.7508	0.9911	3001	5000		beta.i[6780]	0.0007151	0.03132	0.000509	-0.06029	0.001134	0.06197	3001	5000
Zv9_00006309	2.46576	2.85334	4.68451	10.2631	12.5384	5.04761	3.41021	3.38341		pi.1[884]	0.6543	0.2652	0.005511	0.01771	0.7083	0.9857	3001	5000		beta.i[884]	-0.0001523	0.03137	0.0004644	-0.06261	0.0001921	0.06104	3001	5000
Zv9_00050957 Zv9_00050959 Zv9_00050956 Zv9_00050958	5.78461	4.10974	1.70751	10.6861	22.5097	4.6082	4.8235	15.7751		pi.1[7111]	0.5922	0.2445	0.00473	0.0178	0.6344	0.9324	3001	5000		beta.i[7111]	0.001924	0.0317	0.0004162	-0.06042	0.00255	0.06272	3001	5000
Zv9_00007538	1.06771	1.04149	1.40359	9.99183	6.75059	10.1314	8.80979	7.49953		pi.1[1057]	0.6744	0.2703	0.005848	0.01815	0.7443	0.9888	3001	5000		beta.i[1057]	0.0009717	0.03111	0.0004665	-0.06061	0.001378	0.06146	3001	5000
Zv9_00034987 Zv9_00034988 Zv9_00034986	4.66773	16.2113	7.73099	6.95104	7.78549	4.23589	3.20163	2.26512		pi.1[4862]	0.6018	0.2495	0.004142	0.01823	0.6482	0.9424	3001	5000		beta.i[4862]	0.001858	0.03119	0.0005491	-0.05899	0.001975	0.06486	3001	5000
Zv9_00051693	1.29477	1.0034	6.56878	25.5649	81.7222	1.58916	1.3526	1.15687		pi.1[7207]	0.5991	0.2615	0.004732	0.01825	0.6347	0.9798	3001	5000		beta.i[7207]	0.001014	0.03144	0.0004733	-0.05958	0.0004075	0.06414	3001	5000
Zv9_00023617 Zv9_00023616 Zv9_00023619 Zv9_00023618	1	1	1	1	1	35.3656	21.3933	14.3122		pi.1[3280]	0.645	0.2661	0.00509	0.01851	0.699	0.9863	3001	5000		beta.i[3280]	0.0008924	0.03141	0.000473	-0.05924	0.0006678	0.06349	3001	5000
Zv9_00034969	1	1	1	1.01763	1.17635	9.98373	31.3559	17.5174		pi.1[4861]	0.6691	0.2697	0.006982	0.0187	0.7304	0.9895	3001	5000		beta.i[4861]	0.0004689	0.03152	0.0004488	-0.06133	0.0008742	0.06253	3001	5000
Zv9_00015521	1	1	10.3507	30.7481	19.7944	2.64858	1	1		pi.1[2145]	0.6308	0.2634	0.005534	0.01872	0.6709	0.9843	3001	5000		beta.i[2145]	0.0004491	0.0319	0.000445	-0.06271	0.0001261	0.06284	3001	5000
Zv9_00057995 Zv9_00057996	2.86121	2.68287	2.8367	1.97311	3.81132	46.2926	44.481	1.2227		pi.1[8068]	0.5995	0.2602	0.005348	0.01872	0.6351	0.9715	3001	5000		beta.i[8068]	0.001584	0.03099	0.0004903	-0.05982	0.001932	0.06129	3001	5000
Zv9_00018861 Zv9_00018859 Zv9_00018858	248.792	56.8412	13.8639	7.34164	1.60437	1.80092	1.76014	1.57243		pi.1[2618]	0.3597	0.157	0.002259	0.01914	0.3706	0.6355	3001	5000		beta.i[2618]	0.002469	0.03192	0.0005189	-0.06236	0.002989	0.06533	3001	5000
Zv9_00008850	1.39715	1.02967	15.1465	28.8155	9.57249	3.35418	2.86616	1.37612		pi.1[1244]	0.6501	0.2683	0.005146	0.01924	0.7073	0.9893	3001	5000		beta.i[1244]	0.0004798	0.03141	0.0005431	-0.05981	0.0002667	0.06253	3001	5000
Zv9_00054017	1	1	1	1.01727	1.19459	26.1855	19.7465	16.0615		pi.1[7524]	0.6587	0.2671	0.005641	0.01927	0.7154	0.9862	3001	5000		beta.i[7524]	0.0005145	0.03135	0.0005339	-0.06002	0.0001859	0.06342	3001	5000
Zv9_00021837	21.6145	14.6091	19.8785	17.0888	4.7718	1.09591	1	1		pi.1[3036]	0.4776	0.2034	0.002982	0.01942	0.5037	0.7986	3001	5000		beta.i[3036]	0.001161	0.03099	0.0004873	-0.06046	0.001024	0.06282	3001	5000
Zv9_00040037	17.349	5.47487	6.58206	16.1634	2.51899	5.64195	7.58208	37.3009		pi.1[5551]	0.5138	0.2134	0.003142	0.01959	0.5433	0.8382	3001	5000		beta.i[5551]	0.002672	0.03087	0.0004125	-0.05809	0.003095	0.06136	3001	5000
Zv9_00027850	3.95976	1.50964	1.1094	1.14136	1.68093	34.3738	96.1385	3.67448		pi.1[3846]	0.5674	0.2479	0.004544	0.01967	0.5962	0.9489	3001	5000		beta.i[3846]	0.002036	0.03138	0.0005564	-0.05895	0.002417	0.06565	3001	5000
Zv9_00015755	28.7066	9.86939	11.1015	6.67408	6.36336	5.88786	5.45772	5.23399		pi.1[2175]	0.4698	0.2003	0.003491	0.01976	0.4909	0.7883	3001	5000		beta.i[2175]	0.0026	0.03191	0.0005093	-0.05945	0.002385	0.06469	3001	5000
Zv9_00019517	16.1071	27.6419	17.6951	2.82313	2.69875	4.15459	4.32295	5.15106		pi.1[2712]	0.502	0.2143	0.003801	0.02	0.5326	0.8338	3001	5000		beta.i[2712]	0.002294	0.03197	0.000486	-0.06213	0.002612	0.06478	3001	5000
Zv9_00033665	6.46858	38.4037	8.33508	4.03261	1.95655	3.41974	5.03917	8.97016		pi.1[4686]	0.5616	0.2352	0.003524	0.02	0.5985	0.9103	3001	5000		beta.i[4686]	0.001085	0.03112	0.0004787	-0.05743	0.0005708	0.06521	3001	5000
Zv9_00034236	22.8241	12.7746	5.30604	4.89203	7.04122	6.15693	7.10786	5.4192		pi.1[4768]	0.482	0.203	0.003085	0.02002	0.5065	0.8031	3001	5000		beta.i[4768]	0.00204	0.03183	0.0004896	-0.05997	0.002313	0.06357	3001	5000
Zv9_00001407	1.04888	1.0314	1.01506	1.24684	2.10164	18.5123	18.9337	15.2334		pi.1[192]	0.6818	0.2601	0.007055	0.02004	0.7463	0.9902	3001	5000		beta.i[192]	0.0005672	0.03182	0.00046	-0.06064	0.0007721	0.06297	3001	5000
Zv9_00032966 Zv9_00032968 Zv9_00032967	73.9399	23.368	4.35768	3.13781	5.4385	6.89558	6.81442	7.23212		pi.1[4569]	0.4065	0.1781	0.003125	0.02011	0.4177	0.7125	3001	5000		beta.i[4569]	0.002532	0.0317	0.0004477	-0.05937	0.002349	0.06596	3001	5000
Zv9_00026495 Zv9_00026496	9.12186	22.0389	14.1855	6.08886	3.65362	3.80571	2.63168	3.81659		pi.1[3658]	0.5492	0.2252	0.003378	0.0202	0.5877	0.8787	3001	5000		beta.i[3658]	0.001994	0.03142	0.0005214	-0.05902	0.001891	0.06332	3001	5000
Zv9_00033693 Zv9_00033694 Zv9_00033692	21.4739	21.7688	10.3837	5.88738	3.02576	4.61092	4.3815	6.35561		pi.1[4689]	0.4937	0.2028	0.003094	0.0203	0.519	0.8123	3001	5000		beta.i[4689]	0.002585	0.03192	0.0004397	-0.05865	0.002278	0.06605	3001	5000
Zv9_00014373	1.60581	1.83013	1.23279	1.65027	4.1874	10.1477	9.98111	30.1156		pi.1[1998]	0.7125	0.2614	0.005998	0.02035	0.7901	0.9916	3001	5000		beta.i[1998]	0.001372	0.03174	0.0005179	-0.06118	0.001089	0.06401	3001	5000
Zv9_00008983	1.47362	1.00852	17.008	34.8106	8.54394	2.89317	2.28849	1.34226		pi.1[1284]	0.6441	0.2649	0.004821	0.02046	0.69	0.9883	3001	5000		beta.i[1284]	0.0009667	0.03177	0.0005125	-0.06099	0.001359	0.06217	3001	5000
Zv9_00044412 Zv9_00044413	16.5551	21.5561	5.71824	5.17595	2.80974	5.72062	6.96572	10.5272		pi.1[6164]	0.518	0.2065	0.004089	0.02059	0.5491	0.834	3001	5000		beta.i[6164]	0.002177	0.03171	0.0004993	-0.06086	0.002118	0.06358	3001	5000
Zv9_00004742 Zv9_00004741 Zv9_00004743	11.6701	17.5566	21.9464	12.063	2.66534	1	1	1		pi.1[688]	0.52	0.2169	0.004059	0.02062	0.5499	0.8524	3001	5000		beta.i[688]	0.00126	0.03133	0.0004212	-0.06158	0.0005746	0.06229	3001	5000
Zv9_00044483 Zv9_00044484	3.98188	11.4979	16.2739	7.84539	2.08051	2.82647	3.62785	6.3059		pi.1[6177]	0.6194	0.2488	0.004881	0.02067	0.6635	0.9593	3001	5000		beta.i[6177]	0.0005939	0.03174	0.0004553	-0.06095	0.0006658	0.0626	3001	5000
Zv9_00017554	9.69454	1.71216	1.43128	3.11812	10.0526	14.0766	12.8319	15.1936		pi.1[2437]	0.5451	0.2274	0.003894	0.02072	0.5794	0.8834	3001	5000		beta.i[2437]	0.0025	0.03119	0.0004539	-0.05854	0.002672	0.06385	3001	5000
Zv9_00022025 Zv9_00022028 Zv9_00022029 Zv9_00022026 Zv9_00022027	24.4298	11.8904	8.35172	7.18738	3.02028	6.5688	5.86788	11.2455		pi.1[3055]	0.4799	0.2034	0.00324	0.02094	0.5016	0.7998	3001	5000		beta.i[3055]	0.002934	0.0318	0.0004222	-0.05875	0.002788	0.0666	3001	5000
Zv9_00029534	1	1	1	1	1	698.016	88.1663	1.05218		pi.1[4085]	0.5054	0.2398	0.004135	0.02094	0.5136	0.93	3001	5000		beta.i[4085]	0.001505	0.03186	0.0005956	-0.06081	0.00175	0.06352	3001	5000
Zv9_00017503 Zv9_00017505 Zv9_00017504	3.74564	18.2647	7.87524	4.36263	3.30424	5.84504	5.01621	5.73961		pi.1[2431]	0.6189	0.251	0.004494	0.02096	0.6673	0.9608	3001	5000		beta.i[2431]	0.001392	0.03207	0.000432	-0.06174	0.0013	0.06468	3001	5000
Zv9_00050822	4.70671	11.7562	17.3635	8.17126	5.76311	2.83771	2.46138	2.82046		pi.1[7092]	0.6061	0.246	0.00468	0.02144	0.6503	0.947	3001	5000		beta.i[7092]	0.001089	0.03175	0.0004186	-0.06159	0.001409	0.06267	3001	5000
Zv9_00013286 Zv9_00013285	66.0185	15.0768	5.08916	3.87859	9.38242	7.90865	8.0509	7.45868		pi.1[1862]	0.4242	0.184	0.003172	0.02147	0.4403	0.7271	3001	5000		beta.i[1862]	0.002685	0.03167	0.0005296	-0.05774	0.001964	0.06554	3001	5000
Zv9_00046009	4.80585	3.42212	7.37731	17.3438	7.46104	2.84527	2.71117	42.7955		pi.1[6416]	0.6298	0.2501	0.00454	0.02167	0.6834	0.9579	3001	5000		beta.i[6416]	0.001889	0.0318	0.0005437	-0.0608	0.001923	0.0637	3001	5000
Zv9_00057553	26.8298	11.3058	12.0924	10.5231	2.79922	3.51518	6.24916	7.08791		pi.1[7997]	0.4688	0.2014	0.003879	0.02167	0.4924	0.7902	3001	5000		beta.i[7997]	0.001471	0.03167	0.0004492	-0.06036	0.001249	0.0638	3001	5000
Zv9_00042517	133.175	27.8044	9.12396	2.66049	15.8761	6.74676	4.68197	4.19698		pi.1[5882]	0.3925	0.1702	0.002597	0.02171	0.406	0.6786	3001	5000		beta.i[5882]	0.002721	0.03183	0.0004606	-0.06065	0.002683	0.06341	3001	5000
Zv9_00016574 Zv9_00016572 Zv9_00016571 Zv9_00016569 Zv9_00016568 Zv9_00016573 Zv9_00016570 Zv9_00016567	1.10445	1.41685	1.19767	1.47519	13.1038	11.0567	11.5941	8.74188		pi.1[2298]	0.6762	0.2722	0.006133	0.02182	0.7454	0.993	3001	5000		beta.i[2298]	0.0004103	0.03196	0.0004471	-0.06352	0.0003946	0.06436	3001	5000
Zv9_00017828	1.08791	1.18409	1.2734	1.25165	1.24781	8.77276	15.5335	42.6066		pi.1[2469]	0.7041	0.2643	0.00736	0.02183	0.7797	0.9928	3001	5000		beta.i[2469]	0.0005408	0.03156	0.0004893	-0.06179	0.0007247	0.06268	3001	5000
Zv9_00051274	24.995	7.47239	7.95864	9.17964	5.88809	6.67804	8.06964	5.30351		pi.1[7150]	0.483	0.2049	0.003353	0.02189	0.5056	0.8055	3001	5000		beta.i[7150]	0.002733	0.03162	0.0004951	-0.05997	0.002872	0.06602	3001	5000
Zv9_00031643	1	1	9.89068	112.026	12.3321	1	1	1		pi.1[4393]	0.5976	0.2591	0.004951	0.02201	0.6313	0.9779	3001	5000		beta.i[4393]	0.0007461	0.03149	0.0004645	-0.06044	0.0005516	0.06354	3001	5000
Zv9_00018991	12.4437	6.02672	12.4176	29.4507	4.28231	4.06628	1.86011	12.1103		pi.1[2640]	0.5169	0.219	0.003894	0.02203	0.5478	0.8482	3001	5000		beta.i[2640]	0.003657	0.03161	0.0004392	-0.05833	0.003241	0.06559	3001	5000
Zv9_00032956 Zv9_00032961 Zv9_00032958 Zv9_00032957 Zv9_00032962	57.2138	57.6064	8.0356	2.39367	1.39311	4.71552	4.17474	9.96392		pi.1[4567]	0.4216	0.1827	0.002831	0.02204	0.4372	0.7334	3001	5000		beta.i[4567]	0.004016	0.03095	0.0005063	-0.05752	0.004213	0.06483	3001	5000
Zv9_00051316	69.1947	21.4296	4.89617	2.87148	7.23764	9.54279	8.00267	6.53078		pi.1[7159]	0.4192	0.1819	0.002691	0.02211	0.4357	0.7284	3001	5000		beta.i[7159]	0.002959	0.03197	0.0005214	-0.06008	0.003443	0.06524	3001	5000
Zv9_00016286	1	1	1	3.9986	13.7526	8.3067	6.70509	21.96		pi.1[2263]	0.6998	0.2617	0.006759	0.02228	0.7716	0.9916	3001	5000		beta.i[2263]	2.659e-05	0.03207	0.000477	-0.0638	0.000534	0.06208	3001	5000
Zv9_00024819 Zv9_00024818	5.90288	1.83443	1.4675	1.46849	2.43688	15.7075	19.6474	18.6919		pi.1[3431]	0.598	0.2488	0.004861	0.02269	0.6449	0.9362	3001	5000		beta.i[3431]	0.002262	0.03212	0.0004555	-0.06062	0.002304	0.06531	3001	5000
Zv9_00045314	31.8943	12.5278	17.9473	11.8765	1.48618	1.8963	4.26788	18.1478		pi.1[6315]	0.4583	0.1963	0.002542	0.02283	0.4784	0.7768	3001	5000		beta.i[6315]	0.002366	0.03094	0.0005167	-0.05774	0.002189	0.06315	3001	5000
Zv9_00038501	39.2951	16.5321	13.919	7.47013	2.7907	3.25255	4.35899	4.68919		pi.1[5347]	0.442	0.1921	0.002794	0.02297	0.4635	0.7612	3001	5000		beta.i[5347]	0.001831	0.03171	0.0004402	-0.06062	0.001166	0.06525	3001	5000
Zv9_00058042	19.7828	12.0188	20.5262	6.58532	3.34799	4.61083	3.52635	5.70296		pi.1[8074]	0.4931	0.2066	0.003522	0.02304	0.5216	0.8102	3001	5000		beta.i[8074]	0.001464	0.03182	0.0005319	-0.06067	0.001391	0.06359	3001	5000
Zv9_00018348	5.0398	13.5382	19.4243	16.55	2.60547	1.42194	1.36515	21.4784		pi.1[2552]	0.5972	0.2441	0.004375	0.02316	0.6368	0.9366	3001	5000		beta.i[2552]	0.002286	0.03171	0.0004508	-0.05919	0.002169	0.06293	3001	5000
Zv9_00006011	1	6.31645	1	1	27.0564	6.25894	14.8261	38.8793		pi.1[844]	0.677	0.2626	0.005779	0.02322	0.7351	0.9896	3001	5000		beta.i[844]	0.001845	0.0317	0.000483	-0.05935	0.001991	0.06382	3001	5000
Zv9_00044387	121.89	27.1554	17.9254	5.05513	1.42683	3.07503	4.37325	5.27122		pi.1[6157]	0.3853	0.1703	0.002269	0.02329	0.3949	0.6811	3001	5000		beta.i[6157]	0.002483	0.03206	0.0005428	-0.05915	0.002516	0.06492	3001	5000
Zv9_00044760 Zv9_00044761 Zv9_00044758 Zv9_00044759	3.76018	3.7319	1.78897	1.07361	3.73844	15.7976	14.6594	16.0668		pi.1[6224]	0.6422	0.2534	0.005878	0.02362	0.6934	0.9751	3001	5000		beta.i[6224]	0.001252	0.03187	0.0004883	-0.06124	0.001037	0.06455	3001	5000
Zv9_00052579	29.2249	11.4235	6.9057	3.62057	6.66007	7.38692	6.48829	9.72788		pi.1[7326]	0.4745	0.1992	0.003113	0.02368	0.5011	0.791	3001	5000		beta.i[7326]	0.002304	0.03159	0.000497	-0.05874	0.002047	0.06357	3001	5000
Zv9_00016590 Zv9_00016591	25.1194	12.3144	11.4148	7.82163	1.99555	5.18713	6.52484	12.3905		pi.1[2300]	0.4826	0.2008	0.003217	0.02369	0.5064	0.802	3001	5000		beta.i[2300]	0.002728	0.03144	0.0004751	-0.05873	0.002441	0.06593	3001	5000
Zv9_00012423 Zv9_00012420 Zv9_00012424 Zv9_00012422 Zv9_00012421	109.08	34.705	14.8711	3.31134	1.54298	4.8957	3.90934	5.81701		pi.1[1761]	0.3933	0.1724	0.00233	0.02387	0.4031	0.6939	3001	5000		beta.i[1761]	0.002678	0.03109	0.0004516	-0.05926	0.002778	0.06428	3001	5000
Zv9_00037555 Zv9_00037554 Zv9_00037556	83.8303	6.34126	3.42049	6.844	13.3338	16.7803	12.2379	3.20427		pi.1[5221]	0.3984	0.1726	0.002411	0.0239	0.4107	0.6963	3001	5000		beta.i[5221]	0.00248	0.03177	0.0004809	-0.06085	0.002927	0.06472	3001	5000
Zv9_00016669 Zv9_00016670	1.20022	1.15991	2.88288	3.60844	14.4959	8.28685	7.20496	7.1441		pi.1[2312]	0.6821	0.2672	0.006177	0.02414	0.75	0.9918	3001	5000		beta.i[2312]	0.0003291	0.03125	0.0004853	-0.06134	0.0006346	0.06032	3001	5000
Zv9_00045242 Zv9_00045243	23.0238	10.6161	10.6737	7.11911	8.93441	5.4836	4.35714	3.96251		pi.1[6302]	0.4867	0.2023	0.003174	0.02428	0.5132	0.8019	3001	5000		beta.i[6302]	0.002582	0.03113	0.0004825	-0.05708	0.002622	0.06329	3001	5000
Zv9_00015355 Zv9_00015356 Zv9_00015354	1.17202	1.08083	1.13027	1.4305	2.13493	16.8682	15.4236	22.8935		pi.1[2121]	0.695	0.2649	0.006297	0.0244	0.7658	0.9907	3001	5000		beta.i[2121]	0.0008381	0.03191	0.000468	-0.06203	0.001043	0.06209	3001	5000
Zv9_00005246	10.7637	14.1619	17.9817	9.67007	1.64359	3.33705	2.86124	8.65552		pi.1[756]	0.533	0.2234	0.003888	0.02483	0.5627	0.8691	3001	5000		beta.i[756]	0.001925	0.03177	0.0004952	-0.05991	0.002195	0.0643	3001	5000
Zv9_00048032 Zv9_00048031	1	1	1	1.42876	6.99195	10.8966	9.54563	20.0759		pi.1[6699]	0.6831	0.2677	0.005471	0.02515	0.7506	0.9907	3001	5000		beta.i[6699]	0.0003044	0.0312	0.0004104	-0.06031	-0.0005924	0.06304	3001	5000
Zv9_00031169 Zv9_00031168	1.04279	1.12256	1.23006	1.5551	2.96	9.83599	14.9918	18.8577		pi.1[4306]	0.7004	0.2615	0.005587	0.02519	0.7672	0.9928	3001	5000		beta.i[4306]	0.0008553	0.03188	0.0004612	-0.06074	0.0005222	0.06395	3001	5000
Zv9_00004826 Zv9_00004825 Zv9_00004830 Zv9_00004824 Zv9_00004827	25.5483	17.1409	3.71189	2.6676	6.19451	6.02686	11.6014	11.3907		pi.1[701]	0.4783	0.2011	0.003301	0.02527	0.5022	0.7963	3001	5000		beta.i[701]	0.002182	0.03223	0.0004633	-0.05986	0.002118	0.06593	3001	5000
Zv9_00014767 Zv9_00014766	217.94	48.0781	18.2995	6.81337	1.21471	1	1	1		pi.1[2036]	0.3625	0.1602	0.002352	0.02542	0.3774	0.6375	3001	5000		beta.i[2036]	0.002031	0.03178	0.0005275	-0.0598	0.002296	0.06615	3001	5000
Zv9_00042924	155.527	44.1684	18.4626	10.095	1.20084	1.07047	1.09253	1.11469		pi.1[5934]	0.381	0.1675	0.002366	0.02542	0.3933	0.665	3001	5000		beta.i[5934]	0.003364	0.03161	0.0005459	-0.05825	0.003713	0.06523	3001	5000
Zv9_00043951 Zv9_00043954 Zv9_00043948 Zv9_00043952 Zv9_00043953 Zv9_00043950 Zv9_00043949	30.3443	12.81	6.80925	9.40933	2.15126	6.93566	8.02619	13.3808		pi.1[6078]	0.4745	0.1966	0.003099	0.02543	0.5008	0.7807	3001	5000		beta.i[6078]	0.003348	0.03203	0.0004439	-0.06011	0.003751	0.06527	3001	5000
Zv9_00015407 Zv9_00015405	1.41102	1.25158	1.3406	1.93979	1.82968	7.95939	26.5978	22.8966		pi.1[2127]	0.6935	0.2643	0.005789	0.02546	0.763	0.9919	3001	5000		beta.i[2127]	0.0007936	0.03192	0.0004724	-0.06083	0.0005953	0.06409	3001	5000
Zv9_00022673 Zv9_00022675 Zv9_00022674	56.6927	28.73	16.5887	6.36977	1.21349	4.72644	6.1945	3.8693		pi.1[3144]	0.4288	0.1826	0.00271	0.02551	0.4442	0.7352	3001	5000		beta.i[3144]	0.002273	0.03209	0.0005319	-0.06077	0.002087	0.06439	3001	5000
Zv9_00000620	1	1	1.05863	1.19433	1.15	12.9076	23.5484	17.9992		pi.1[99]	0.6789	0.2616	0.006159	0.02557	0.7413	0.9891	3001	5000		beta.i[99]	0.000549	0.03111	0.0004695	-0.05904	0.0005827	0.06121	3001	5000
Zv9_00056437	1	1	1	1.07257	13.2848	14.5328	11.016	9.61046		pi.1[7817]	0.6638	0.2666	0.006298	0.02557	0.7268	0.9896	3001	5000		beta.i[7817]	6.559e-05	0.03163	0.0004519	-0.06285	0.0005008	0.06282	3001	5000
Zv9_00046575 Zv9_00046573	5.53798	13.8268	17.6029	10.6827	2.66379	1.5138	1.52282	2.13748		pi.1[6488]	0.5792	0.2389	0.00434	0.02601	0.6183	0.9255	3001	5000		beta.i[6488]	0.001699	0.03158	0.0005673	-0.06121	0.001568	0.06448	3001	5000
Zv9_00057863 Zv9_00057865 Zv9_00057864 Zv9_00057866	22.4317	8.33641	14.9064	20.1635	1.22905	3.90559	5.26068	22.2816		pi.1[8054]	0.4796	0.2047	0.003817	0.02624	0.5025	0.8	3001	5000		beta.i[8054]	0.002413	0.03193	0.0004596	-0.06088	0.002356	0.06395	3001	5000
Zv9_00032745 Zv9_00032744 Zv9_00032746	50.2251	18.7836	49.445	15.0153	1.7649	1	1	5.71939		pi.1[4539]	0.4383	0.1839	0.002736	0.02638	0.4593	0.7395	3001	5000		beta.i[4539]	0.002429	0.03168	0.000531	-0.05915	0.002279	0.06508	3001	5000
Zv9_00013089 Zv9_00013086 Zv9_00013090 Zv9_00013087 Zv9_00013088	30.2035	17.3359	15.6575	7.74408	2.98133	4.44106	3.35214	5.00003		pi.1[1835]	0.4686	0.1942	0.003036	0.02643	0.4902	0.7844	3001	5000		beta.i[1835]	0.002851	0.03215	0.0004857	-0.06087	0.00322	0.06667	3001	5000
Zv9_00013476	58.1269	29.8203	10.933	5.23073	5.27553	2.95461	3.14472	2.78473		pi.1[1884]	0.424	0.184	0.002958	0.02647	0.4407	0.7327	3001	5000		beta.i[1884]	0.002421	0.03171	0.0004228	-0.0589	0.002554	0.06465	3001	5000
Zv9_00002333 Zv9_00002332 Zv9_00002331 Zv9_00002329	20.8791	9.32081	9.80997	8.14545	13.9833	10.9126	1	1		pi.1[337]	0.4765	0.2069	0.00325	0.02664	0.4979	0.8099	3001	5000		beta.i[337]	0.002457	0.03151	0.0005192	-0.05914	0.00201	0.06408	3001	5000
Zv9_00002481 Zv9_00002478 Zv9_00002480 Zv9_00002477 Zv9_00002479	1.49372	1.40649	3.73421	5.16457	10.998	12.2795	6.7655	2.89605		pi.1[364]	0.6807	0.2647	0.006006	0.02687	0.7454	0.9904	3001	5000		beta.i[364]	0.0002099	0.03189	0.0004384	-0.06207	0.0001987	0.06441	3001	5000
Zv9_00055883	29.0262	14.98	12.9892	6.46489	4.90956	3.83238	3.73295	3.2299		pi.1[7743]	0.4622	0.1973	0.003346	0.02701	0.4808	0.7792	3001	5000		beta.i[7743]	0.003146	0.032	0.0004768	-0.06116	0.003954	0.06464	3001	5000
Zv9_00049376 Zv9_00049377 Zv9_00049372 Zv9_00049375 Zv9_00049374 Zv9_00049378 Zv9_00049373	11.5271	8.332	11.3531	17.3429	8.30815	1.4034	1.13016	1.03308		pi.1[6893]	0.5113	0.2189	0.003774	0.02718	0.5427	0.8556	3001	5000		beta.i[6893]	0.002015	0.03138	0.000423	-0.05879	0.002196	0.06169	3001	5000
Zv9_00028929	1.0413	1.04729	1.0342	1.25276	7.50155	15.0988	13.9792	9.25291		pi.1[3996]	0.672	0.2611	0.006118	0.02733	0.729	0.9886	3001	5000		beta.i[3996]	0.001043	0.03192	0.0004738	-0.06312	0.001375	0.06264	3001	5000
Zv9_00026041 Zv9_00026039 Zv9_00026042 Zv9_00026040	95.4043	30.9581	18.378	4.89537	1.69456	3.55253	4.29821	4.89915		pi.1[3598]	0.4054	0.1723	0.002587	0.02764	0.4186	0.7034	3001	5000		beta.i[3598]	0.004536	0.03167	0.0005078	-0.05698	0.004167	0.06609	3001	5000
Zv9_00005429 Zv9_00005428 Zv9_00005430	6.1841	7.46154	14.7583	14.7785	2.62647	1.85708	3.51707	7.63837		pi.1[781]	0.5762	0.2393	0.00395	0.02774	0.6144	0.9208	3001	5000		beta.i[781]	0.0009975	0.03134	0.0004257	-0.05986	0.0009887	0.0633	3001	5000
Zv9_00001978 Zv9_00001979 Zv9_00001980 Zv9_00001975 Zv9_00001976 Zv9_00001973 Zv9_00001972 Zv9_00001974 Zv9_00001977	98.7795	45.1406	20.2135	7.90624	1.24865	1	1	1		pi.1[274]	0.401	0.1745	0.00235	0.02778	0.4123	0.7023	3001	5000		beta.i[274]	0.002954	0.03125	0.0004749	-0.05863	0.002896	0.06431	3001	5000
Zv9_00037065	1.04296	1	1.51958	1.13379	1.1088	6.16332	54.0429	18.3901		pi.1[5150]	0.6699	0.2671	0.00551	0.02779	0.7349	0.9909	3001	5000		beta.i[5150]	-0.0001572	0.0311	0.0005009	-0.06008	-0.0004674	0.06125	3001	5000
Zv9_00058070 Zv9_00058069	40.2399	12.7056	7.74427	3.88922	9.8603	6.87809	7.00294	11.8284		pi.1[8078]	0.4648	0.1914	0.002705	0.02779	0.4907	0.7695	3001	5000		beta.i[8078]	0.00311	0.03164	0.0004522	-0.05864	0.002572	0.06523	3001	5000
Zv9_00029652	1.32461	1	1.93813	2.99804	1.39876	8.59527	10.3046	54.9273		pi.1[4104]	0.6974	0.2659	0.005515	0.02797	0.7681	0.9924	3001	5000		beta.i[4104]	0.0005257	0.03192	0.000431	-0.06191	0.0002559	0.06386	3001	5000
Zv9_00026768	1	1	1.09456	3.52725	9.11031	17.5211	19.6398	3.49145		pi.1[3692]	0.6703	0.2605	0.005932	0.02804	0.7281	0.9906	3001	5000		beta.i[3692]	0.0004446	0.03191	0.0004302	-0.06143	0.0004762	0.06249	3001	5000
Zv9_00018913 Zv9_00018912	1	1	1.16112	1.22977	2.72127	18.745	16.3668	8.36392		pi.1[2629]	0.6645	0.2658	0.005931	0.02805	0.7245	0.9878	3001	5000		beta.i[2629]	0.0002287	0.03217	0.0005382	-0.06121	0.0009724	0.06363	3001	5000
Zv9_00050109	4.56592	1	6.44736	7.65894	21.1697	5.75541	4.84571	10.6827		pi.1[6983]	0.6204	0.2475	0.004563	0.02834	0.6668	0.9601	3001	5000		beta.i[6983]	0.001082	0.03135	0.0004998	-0.05949	0.001335	0.06229	3001	5000
Zv9_00013099	1.1014	1.0366	1.14441	1.2618	1.33558	19.1702	23.1687	15.6755		pi.1[1837]	0.6694	0.2606	0.005807	0.0284	0.7273	0.9879	3001	5000		beta.i[1837]	0.0006037	0.03174	0.0004941	-0.06204	0.0007716	0.06245	3001	5000
Zv9_00025553 Zv9_00025546 Zv9_00025548 Zv9_00025560 Zv9_00025552 Zv9_00025547 Zv9_00025551 Zv9_00025549	1.88651	2.39188	6.93484	14.0755	8.77657	4.4982	4.48689	2.8513		pi.1[3529]	0.6694	0.2619	0.006493	0.02868	0.7256	0.9885	3001	5000		beta.i[3529]	0.0004812	0.03182	0.0005345	-0.06068	-0.0001895	0.06368	3001	5000
Zv9_00044014 Zv9_00044015 Zv9_00044012 Zv9_00044013	2.42947	1.53936	2.1622	2.68006	1.03654	11.9035	27.4683	19.965		pi.1[6090]	0.6838	0.2608	0.00578	0.02924	0.748	0.9878	3001	5000		beta.i[6090]	0.0009366	0.03132	0.0004761	-0.06107	0.001192	0.06166	3001	5000
Zv9_00058294	1.46429	1.81744	5.40655	8.31624	17.522	6.95652	5.05903	2.36299		pi.1[8109]	0.6729	0.2623	0.00441	0.02924	0.7334	0.9884	3001	5000		beta.i[8109]	0.0009199	0.03177	0.0004493	-0.06163	0.00108	0.06336	3001	5000
Zv9_00057827 Zv9_00057826	26.567	27.1734	20.1318	7.7353	3.89631	1.85864	2.00672	3.82184		pi.1[8043]	0.4821	0.1937	0.002838	0.02925	0.5039	0.798	3001	5000		beta.i[8043]	0.002091	0.0317	0.0004324	-0.06128	0.002439	0.06439	3001	5000
Zv9_00001789 Zv9_00001791 Zv9_00001788 Zv9_00001790	22.7573	13.5235	20.5473	12.5439	13.4886	1	1	1		pi.1[250]	0.4786	0.2002	0.002958	0.02959	0.4997	0.8009	3001	5000		beta.i[250]	0.001987	0.03223	0.0005183	-0.06107	0.00171	0.06674	3001	5000
Zv9_00003330 Zv9_00003329	1.4717	1.55057	1.65887	1.38225	2.14552	14.2582	16.9336	16.1205		pi.1[481]	0.6869	0.2609	0.005503	0.02967	0.7542	0.9897	3001	5000		beta.i[481]	0.0003512	0.03134	0.0004653	-0.06079	-0.0002164	0.06163	3001	5000
Zv9_00037472 Zv9_00037471	36.2835	35.6759	12.4114	4.45601	1.51331	2.38312	4.23989	9.03424		pi.1[5204]	0.4538	0.1935	0.002658	0.0299	0.4705	0.7719	3001	5000		beta.i[5204]	0.002976	0.03151	0.0004926	-0.0583	0.001974	0.06704	3001	5000
Zv9_00026684 Zv9_00026683 Zv9_00026686 Zv9_00026685 Zv9_00026682	370.166	108.214	7.18782	3.33188	2.17657	2.16918	2.25993	2.75366		pi.1[3681]	0.3484	0.1504	0.002299	0.03003	0.3575	0.6141	3001	5000		beta.i[3681]	0.002579	0.03144	0.0006236	-0.05851	0.002419	0.06437	3001	5000
Zv9_00030973 Zv9_00030972	29.8059	17.7884	20.3644	6.77254	3.8227	3.2149	4.4624	2.66261		pi.1[4283]	0.4695	0.1956	0.003171	0.03003	0.489	0.7785	3001	5000		beta.i[4283]	0.002008	0.03186	0.0004909	-0.05755	0.00184	0.06527	3001	5000
Zv9_00034693	1.01149	1.02211	1.08401	1.03909	6.17326	9.55272	14.6161	17.555		pi.1[4819]	0.6937	0.2616	0.0059	0.03008	0.7615	0.9914	3001	5000		beta.i[4819]	0.000309	0.03109	0.0004213	-0.06154	0.000628	0.06084	3001	5000
Zv9_00012436 Zv9_00012435	7.01575	12.7501	16.7498	6.41813	4.27337	3.14559	2.62925	3.93619		pi.1[1762]	0.5727	0.2298	0.004593	0.03019	0.6062	0.9035	3001	5000		beta.i[1762]	0.001847	0.03198	0.000469	-0.06074	0.001294	0.06452	3001	5000
Zv9_00044537 Zv9_00044539 Zv9_00044540 Zv9_00044538	577.726	47.9577	22.0645	9.39403	2.12662	1.3881	1.25244	1.33314		pi.1[6187]	0.3406	0.1442	0.002473	0.03042	0.3505	0.5952	3001	5000		beta.i[6187]	0.003834	0.03172	0.0008209	-0.05803	0.003381	0.06605	3001	5000
Zv9_00001981	1.1151	1.09332	1.56618	8.99225	10.776	7.32458	4.91533	16.1366		pi.1[275]	0.6871	0.2686	0.005339	0.03049	0.7612	0.9876	3001	5000		beta.i[275]	0.0008032	0.03159	0.0004252	-0.06241	0.0007015	0.0629	3001	5000
Zv9_00042078 Zv9_00042075 Zv9_00042076 Zv9_00042074 Zv9_00042077	36.7372	4.04823	3.63464	4.46786	6.97811	10.539	12.8246	19.2123		pi.1[5829]	0.4569	0.1931	0.003014	0.03064	0.4776	0.7712	3001	5000		beta.i[5829]	0.002687	0.03196	0.0005174	-0.0599	0.002689	0.06536	3001	5000
Zv9_00057626 Zv9_00057624	1.31368	1.55788	5.00763	12.5758	11.1639	4.48844	4.76649	4.01976		pi.1[8010]	0.6808	0.2711	0.006982	0.03101	0.7486	0.9933	3001	5000		beta.i[8010]	0.000619	0.03156	0.0004747	-0.06342	0.0008794	0.06323	3001	5000
Zv9_00056491	2.92367	6.82693	2.54005	2.04453	2.16546	9.39754	10.7029	22.1999		pi.1[7821]	0.6649	0.2598	0.004798	0.03109	0.7233	0.985	3001	5000		beta.i[7821]	0.001299	0.03221	0.0004903	-0.06218	0.0009171	0.06525	3001	5000
Zv9_00021395	10.1181	22.1253	4.61825	3.23519	4.14921	6.87562	9.51932	7.37077		pi.1[2982]	0.5439	0.2212	0.003541	0.03149	0.5752	0.8768	3001	5000		beta.i[2982]	0.002556	0.03153	0.0004481	-0.05785	0.002323	0.06621	3001	5000
Zv9_00024245 Zv9_00024243 Zv9_00024244	3.07285	1.19219	4.11917	10.2505	17.3794	5.01871	5.15894	5.87877		pi.1[3367]	0.6572	0.2576	0.005784	0.0315	0.7181	0.9825	3001	5000		beta.i[3367]	0.0008444	0.0314	0.0004531	-0.06064	0.001135	0.06329	3001	5000
Zv9_00044446 Zv9_00044448 Zv9_00044445 Zv9_00044444 Zv9_00044447	13.0374	6.21002	3.43818	1.75362	2.61592	11.8626	18.5067	17.4971		pi.1[6171]	0.526	0.2197	0.00302	0.0322	0.5575	0.861	3001	5000		beta.i[6171]	0.002069	0.03159	0.0004725	-0.06157	0.002195	0.06399	3001	5000
Zv9_00046954 Zv9_00046955	1	1	1	2.57372	12.0722	13.1538	13.5067	5.74935		pi.1[6547]	0.6773	0.265	0.006347	0.03231	0.7397	0.9899	3001	5000		beta.i[6547]	0.0002914	0.03191	0.0005934	-0.0624	7.114e-05	0.06327	3001	5000
Zv9_00000008 Zv9_00000006 Zv9_00000003 Zv9_00000004 Zv9_00000009 Zv9_00000007 Zv9_00000005	1	1	1	1	1.08808	10.2642	17.4245	33.8835		pi.1[1]	0.6929	0.2634	0.006264	0.03244	0.7606	0.9902	3001	5000		beta.i[1]	-0.0004665	0.0312	0.000413	-0.061	-0.0002742	0.05999	3001	5000
Zv9_00014965 Zv9_00014963 Zv9_00014964	1.88751	3.77739	11.195	15.6188	7.3235	3.27858	2.88551	5.0472		pi.1[2078]	0.6801	0.258	0.005236	0.03249	0.74	0.9889	3001	5000		beta.i[2078]	0.002165	0.0318	0.0004153	-0.06043	0.00246	0.06486	3001	5000
Zv9_00038054 Zv9_00038053 Zv9_00038055 Zv9_00038052 Zv9_00038051	61.2598	50.1635	70.1784	1	1	1	1	1		pi.1[5296]	0.4033	0.1773	0.002436	0.03293	0.4187	0.7097	3001	5000		beta.i[5296]	0.002357	0.03157	0.0005093	-0.06049	0.002734	0.06377	3001	5000
Zv9_00033660 Zv9_00033659	1.3263	1	13.2793	54.8227	3.48796	4.93122	4.29256	5.67211		pi.1[4684]	0.6473	0.2584	0.004413	0.0331	0.696	0.9852	3001	5000		beta.i[4684]	0.0004191	0.03196	0.0004376	-0.06323	0.000672	0.06224	3001	5000
Zv9_00029833 Zv9_00029834	94.2541	8.52598	9.76748	7.49769	11.3369	8.22767	7.87576	3.68865		pi.1[4125]	0.4054	0.1739	0.002516	0.0332	0.42	0.705	3001	5000		beta.i[4125]	0.003392	0.03154	0.0005709	-0.05887	0.003542	0.06529	3001	5000
Zv9_00036601	53.4911	22.8688	9.02843	4.73086	5.565	6.16402	6.86857	5.94327		pi.1[5077]	0.4441	0.1843	0.002906	0.03334	0.4612	0.7475	3001	5000		beta.i[5077]	0.003058	0.03175	0.0004777	-0.05905	0.003013	0.06558	3001	5000
Zv9_00010264 Zv9_00010263 Zv9_00010265	1.57372	1.18683	17.1123	25.6428	9.31463	3.54137	2.96743	1.74369		pi.1[1491]	0.6527	0.2624	0.004719	0.03365	0.7063	0.9855	3001	5000		beta.i[1491]	0.0008819	0.03165	0.000453	-0.06033	0.0009352	0.06284	3001	5000
Zv9_00029056	136.54	25.7251	18.0596	8.48769	1.43073	2.57821	6.78174	8.03648		pi.1[4009]	0.3892	0.1654	0.002569	0.03369	0.4007	0.6756	3001	5000		beta.i[4009]	0.003489	0.03147	0.0005138	-0.05824	0.003728	0.06546	3001	5000
Zv9_00046934	3.00837	4.61645	4.12858	2.30675	3.59679	7.54396	9.08018	14.5213		pi.1[6542]	0.6648	0.2585	0.005497	0.03399	0.7215	0.9867	3001	5000		beta.i[6542]	0.001302	0.03176	0.0004512	-0.06129	0.001276	0.06388	3001	5000
Zv9_00016314 Zv9_00016313	1	1	1	3.34956	3.97881	8.87133	8.22743	47.7322		pi.1[2268]	0.7052	0.2642	0.006051	0.03434	0.7797	0.9911	3001	5000		beta.i[2268]	0.0008954	0.03137	0.0004485	-0.06101	0.001331	0.06219	3001	5000
Zv9_00031642 Zv9_00031641	1.47952	2.14089	1.44781	1.31623	13.3142	14.418	12.164	8.53121		pi.1[4392]	0.6794	0.2635	0.006142	0.03442	0.7421	0.9877	3001	5000		beta.i[4392]	0.001294	0.03149	0.0004458	-0.06087	0.001864	0.06221	3001	5000
Zv9_00057483	46.0124	14.3143	7.99449	9.60269	9.78517	4.84951	4.53379	3.17208		pi.1[7977]	0.4427	0.1873	0.002884	0.03448	0.4628	0.7539	3001	5000		beta.i[7977]	0.00281	0.03188	0.0005338	-0.06019	0.003156	0.06535	3001	5000
Zv9_00034608	1	1	1	1	1.08111	5.85768	9.37031	148.241		pi.1[4810]	0.7238	0.2628	0.006267	0.0346	0.8041	0.9945	3001	5000		beta.i[4810]	-0.0002442	0.03138	0.000541	-0.06136	-0.0002543	0.06137	3001	5000
Zv9_00004094 Zv9_00004092 Zv9_00004093	105.314	20.0761	9.98132	5.77029	3.40978	7.90303	6.5745	5.88137		pi.1[579]	0.4026	0.1718	0.002531	0.03466	0.4161	0.6919	3001	5000		beta.i[579]	0.003	0.03223	0.0004909	-0.06077	0.00315	0.0653	3001	5000
Zv9_00058676	7.16652	5.4581	2.89695	1	1	7.2551	10.948	164.836		pi.1[8164]	0.6084	0.2352	0.004528	0.03467	0.661	0.9229	3001	5000		beta.i[8164]	0.00169	0.03134	0.0005239	-0.05806	0.001706	0.06416	3001	5000
Zv9_00026764	1	1	1.02066	1.67514	6.07662	26.609	26.7686	3.33994		pi.1[3689]	0.6551	0.2593	0.005938	0.0347	0.7027	0.9874	3001	5000		beta.i[3689]	0.001086	0.03153	0.0004408	-0.06051	0.001425	0.06237	3001	5000
Zv9_00030123	11.3171	5.93613	6.74987	5.66251	2.46847	6.86118	7.70711	34.6175		pi.1[4165]	0.5535	0.2219	0.004485	0.03479	0.5926	0.878	3001	5000		beta.i[4165]	0.001905	0.03166	0.0004635	-0.06118	0.002116	0.06297	3001	5000
Zv9_00056810	1.05951	1.17737	1.15466	1.79085	8.84807	8.52047	10.4363	16.1242		pi.1[7866]	0.6851	0.2653	0.005439	0.03483	0.7549	0.9899	3001	5000		beta.i[7866]	-0.0004539	0.03147	0.000457	-0.06297	-0.0002697	0.06092	3001	5000
Zv9_00011954	1.18813	1.00749	7.38322	13.2771	12.6825	6.22263	4.01715	2.16347		pi.1[1713]	0.6741	0.2641	0.004679	0.03487	0.7394	0.9896	3001	5000		beta.i[1713]	0.000526	0.03188	0.0005208	-0.06211	0.0003576	0.0618	3001	5000
Zv9_00018657	1	1.02954	1.02885	1.06914	5.01831	15.9456	16.8902	9.66674		pi.1[2596]	0.6752	0.2617	0.005746	0.0351	0.7436	0.987	3001	5000		beta.i[2596]	0.0004303	0.03135	0.0005187	-0.06007	0.0005469	0.06069	3001	5000
Zv9_00052848 Zv9_00052850 Zv9_00052853 Zv9_00052847 Zv9_00052851 Zv9_00052852 Zv9_00052849	23.9258	10.7139	20.9297	7.98586	2.33228	3.75906	5.66077	7.01898		pi.1[7362]	0.4851	0.2015	0.00275	0.0351	0.5098	0.8034	3001	5000		beta.i[7362]	0.002069	0.0318	0.0005056	-0.06071	0.002515	0.06494	3001	5000
Zv9_00053195 Zv9_00053191 Zv9_00053197 Zv9_00053194 Zv9_00053198 Zv9_00053190 Zv9_00053196 Zv9_00053193 Zv9_00053200 Zv9_00053192 Zv9_00053199	17.9835	17.0123	9.79691	1	1	60.8387	74.7923	1		pi.1[7403]	0.4503	0.1964	0.003416	0.03531	0.4655	0.7869	3001	5000		beta.i[7403]	0.00232	0.03224	0.0006593	-0.06268	0.002119	0.06499	3001	5000
Zv9_00037321 Zv9_00037320	85.1931	22.0062	7.13933	4.86882	5.62849	6.36723	6.13019	5.1512		pi.1[5180]	0.409	0.1776	0.002459	0.03543	0.4255	0.709	3001	5000		beta.i[5180]	0.003368	0.03174	0.0004458	-0.0608	0.003511	0.0644	3001	5000
Zv9_00041709 Zv9_00041710	12.008	27.9594	20.4943	5.23788	1.65129	2.93662	3.13034	3.95702		pi.1[5783]	0.5223	0.2149	0.003368	0.03568	0.5525	0.8493	3001	5000		beta.i[5783]	0.00302	0.03091	0.00043	-0.05718	0.003099	0.06511	3001	5000
Zv9_00010998 Zv9_00010997	1.56594	1.8024	1.41669	1.41975	1.74646	24.2085	18.668	11.6962		pi.1[1579]	0.6728	0.2631	0.005296	0.03601	0.7345	0.9887	3001	5000		beta.i[1579]	0.001165	0.0312	0.0005358	-0.05921	0.0008648	0.0649	3001	5000
Zv9_00037054 Zv9_00037055	8.48054	28.4251	23.3171	6.76965	1.37358	1.50553	1.60945	1.57754		pi.1[5147]	0.5393	0.2222	0.0037	0.03647	0.5659	0.8777	3001	5000		beta.i[5147]	0.0009661	0.03245	0.00048	-0.0636	0.001705	0.06361	3001	5000
Zv9_00000060	1.02994	1.01656	1.24122	2.29834	2.33436	13.7555	10.4475	27.5165		pi.1[13]	0.6927	0.2636	0.00605	0.03679	0.7637	0.9901	3001	5000		beta.i[13]	-2.282e-05	0.0321	0.0005495	-0.06414	0.0003269	0.06376	3001	5000
Zv9_00004299 Zv9_00004300 Zv9_00004297 Zv9_00004301 Zv9_00004302 Zv9_00004298	2.47616	3.66991	6.94776	5.33465	26.0274	28.3315	1	1		pi.1[611]	0.6317	0.2607	0.004527	0.03679	0.6802	0.9834	3001	5000		beta.i[611]	0.0005574	0.03157	0.0004711	-0.06193	0.0008725	0.06289	3001	5000
Zv9_00025829 Zv9_00025830	1.23262	1.39889	2.07216	2.0135	4.48072	10.7669	10.4207	17.5605		pi.1[3567]	0.6944	0.2662	0.006206	0.03698	0.7637	0.9919	3001	5000		beta.i[3567]	0.001098	0.03133	0.0004427	-0.06098	0.001045	0.06405	3001	5000
Zv9_00037081 Zv9_00037082 Zv9_00037080	1.34741	2.04571	3.13211	3.93352	4.79267	12.3102	10.2366	10.6245		pi.1[5153]	0.6971	0.2595	0.006421	0.0372	0.766	0.9908	3001	5000		beta.i[5153]	0.001473	0.03145	0.0004832	-0.05998	0.002293	0.06206	3001	5000
Zv9_00015399 Zv9_00015401 Zv9_00015400	123.843	27.4961	10.2602	3.39881	7.86174	6.56106	5.0734	3.3796		pi.1[2126]	0.4002	0.1669	0.002577	0.03722	0.4127	0.6843	3001	5000		beta.i[2126]	0.002396	0.03111	0.0005603	-0.05968	0.002814	0.06448	3001	5000
Zv9_00010429 Zv9_00010432 Zv9_00010431 Zv9_00010430	23.4176	15.5603	10.089	21.9309	8.90524	1.21976	1	1		pi.1[1506]	0.4767	0.1975	0.002789	0.03751	0.4985	0.7933	3001	5000		beta.i[1506]	0.002445	0.03127	0.000498	-0.05837	0.002921	0.06465	3001	5000
Zv9_00056789 Zv9_00056790	38.3545	9.60916	2.64778	9.97563	10.6077	10.4936	11.6505	5.00738		pi.1[7862]	0.4579	0.1901	0.003282	0.0376	0.4781	0.7702	3001	5000		beta.i[7862]	0.002824	0.03175	0.0004627	-0.05869	0.002641	0.0657	3001	5000
Zv9_00004326 Zv9_00004325 Zv9_00004327	1.01794	1.03238	1.04833	1.43797	20.9424	16.049	13.2494	4.20025		pi.1[616]	0.6594	0.2573	0.005458	0.03766	0.7085	0.9851	3001	5000		beta.i[616]	0.0004688	0.03138	0.0004043	-0.06101	-8.843e-06	0.0623	3001	5000
Zv9_00007237 Zv9_00007240 Zv9_00007239 Zv9_00007238 Zv9_00007236 Zv9_00007235	1	1	1.01675	1.33246	3.50033	12.4385	14.6407	18.8444		pi.1[1017]	0.6828	0.2676	0.006096	0.03789	0.7511	0.9927	3001	5000		beta.i[1017]	0.0005649	0.03131	0.0004365	-0.06115	0.0005821	0.06111	3001	5000
Zv9_00026208 Zv9_00026209	46.8172	19.8121	9.26648	7.32727	4.62842	7.04368	5.4538	2.95277		pi.1[3622]	0.4439	0.185	0.002699	0.03804	0.4605	0.746	3001	5000		beta.i[3622]	0.002987	0.03204	0.0004422	-0.05875	0.002444	0.06483	3001	5000
Zv9_00057932	1.58617	1.11326	16.8936	22.4169	9.57999	3.56906	2.75619	1.4351		pi.1[8060]	0.6572	0.2627	0.005839	0.03824	0.7114	0.9891	3001	5000		beta.i[8060]	0.001562	0.03168	0.0004309	-0.06075	0.001413	0.06452	3001	5000
Zv9_00050364	1.59598	2.20682	3.77086	2.63436	1.34702	13.1937	16.039	17.6859		pi.1[7025]	0.6994	0.2605	0.006297	0.03857	0.7683	0.9895	3001	5000		beta.i[7025]	0.000817	0.03193	0.0004432	-0.06324	0.001416	0.06278	3001	5000
Zv9_00051356 Zv9_00051353 Zv9_00051352 Zv9_00051355 Zv9_00051354	48.8795	24.594	16.7707	11.0451	3.95313	2.71774	1.41846	1.18139		pi.1[7164]	0.4397	0.1812	0.003007	0.03865	0.4572	0.7417	3001	5000		beta.i[7164]	0.002352	0.03136	0.0005035	-0.05978	0.002966	0.06301	3001	5000
Zv9_00048050	1.22357	1.05793	5.36867	14.4919	9.26396	6.73561	4.24957	4.29143		pi.1[6705]	0.6719	0.2627	0.005442	0.03872	0.7361	0.9901	3001	5000		beta.i[6705]	0.0007522	0.03186	0.0004722	-0.06193	0.0006193	0.06331	3001	5000
Zv9_00022658	7.65936	6.25447	6.85033	5.83253	25.1655	5.91413	3.23355	3.37626		pi.1[3139]	0.5667	0.227	0.003842	0.03878	0.6042	0.8992	3001	5000		beta.i[3139]	0.001197	0.03127	0.0004852	-0.05962	0.001012	0.06138	3001	5000
Zv9_00057973	1	4.88015	10.0893	150.136	1	1	10.7772	55.5782		pi.1[8063]	0.6208	0.2581	0.004748	0.03885	0.6607	0.9819	3001	5000		beta.i[8063]	0.001467	0.03161	0.0004879	-0.05977	0.00141	0.06493	3001	5000
Zv9_00046616	1.23571	1.15211	3.40931	10.8919	14.8102	5.45222	5.55554	7.5236		pi.1[6495]	0.6766	0.2661	0.006877	0.03891	0.7435	0.9906	3001	5000		beta.i[6495]	0.0004851	0.03157	0.0004699	-0.06102	0.0006134	0.06144	3001	5000
Zv9_00032730	20.3346	20.6587	5.59626	5.80392	18.6499	4.60306	2.7859	1.93268		pi.1[4536]	0.4834	0.2008	0.00318	0.03894	0.507	0.8069	3001	5000		beta.i[4536]	0.002389	0.03192	0.0004805	-0.05842	0.002623	0.06472	3001	5000
Zv9_00000702 Zv9_00000703	1.03299	1.04591	1.07414	5.55552	17.3231	6.51403	9.23773	7.64798		pi.1[106]	0.6678	0.2665	0.006382	0.03897	0.7307	0.9894	3001	5000		beta.i[106]	0.0006101	0.03192	0.0004428	-0.06215	0.000402	0.06376	3001	5000
Zv9_00004495	21.5775	18.6172	12.2329	4.25985	5.81725	5.4354	4.32016	4.94266		pi.1[649]	0.4982	0.2023	0.003353	0.03934	0.5245	0.8137	3001	5000		beta.i[649]	0.002758	0.03128	0.0004257	-0.05567	0.002163	0.06591	3001	5000
Zv9_00003658	1	1	1	1.01488	1.04317	7.07539	15.911	60.9101		pi.1[524]	0.7143	0.2601	0.006909	0.03941	0.7892	0.9919	3001	5000		beta.i[524]	0.000691	0.03139	0.0004947	-0.06083	0.001074	0.06086	3001	5000
Zv9_00052422	73.1768	26.3467	8.06193	5.7301	9.44098	5.35823	3.78147	2.67601		pi.1[7302]	0.421	0.1744	0.00302	0.03944	0.4331	0.7155	3001	5000		beta.i[7302]	0.001801	0.03194	0.0004701	-0.0587	0.001539	0.06483	3001	5000
Zv9_00057116 Zv9_00057117 Zv9_00057115	75.1651	1	28.7451	36.3944	49.2801	36.2327	1	1		pi.1[7908]	0.4078	0.1676	0.002721	0.03956	0.4214	0.6962	3001	5000		beta.i[7908]	0.002946	0.03169	0.0005171	-0.05866	0.002971	0.06624	3001	5000
Zv9_00025064	1.22317	1	10.5443	1	16.0467	12.8249	14.7142	11.0679		pi.1[3463]	0.6569	0.2632	0.004777	0.0397	0.7157	0.9871	3001	5000		beta.i[3463]	0.00081	0.03161	0.000451	-0.06157	0.000735	0.06196	3001	5000
Zv9_00003980 Zv9_00003981	65.7023	28.255	18.675	5.1545	2.67939	4.59963	2.40835	2.88495		pi.1[563]	0.4253	0.1766	0.00246	0.03973	0.4414	0.7265	3001	5000		beta.i[563]	0.002498	0.03163	0.0004988	-0.06047	0.003044	0.06445	3001	5000
Zv9_00054189	34.7667	15.1182	7.11736	3.88399	6.72818	7.88788	7.19002	7.35189		pi.1[7536]	0.4674	0.1898	0.002814	0.03974	0.4864	0.7737	3001	5000		beta.i[7536]	0.002657	0.03165	0.0004423	-0.05928	0.002545	0.06539	3001	5000
Zv9_00057358 Zv9_00057359 Zv9_00057357 Zv9_00057360	34.6037	17.0665	5.56595	10.2797	10.8066	5.25083	4.12554	2.79258		pi.1[7953]	0.4627	0.1934	0.002978	0.04016	0.4882	0.7702	3001	5000		beta.i[7953]	0.002851	0.03182	0.0004341	-0.06017	0.002945	0.06492	3001	5000
Zv9_00018262	30.9011	10.3369	16.2479	22.0369	12.4484	1.81471	1.23348	1.01211		pi.1[2537]	0.4663	0.1902	0.002986	0.04036	0.4869	0.7787	3001	5000		beta.i[2537]	0.002282	0.03138	0.0004748	-0.05902	0.002301	0.06482	3001	5000
Zv9_00000608	2.67325	4.87988	3.55014	2.20414	1.60726	19.6826	21.3749	8.3798		pi.1[95]	0.6622	0.2555	0.005459	0.04038	0.7181	0.9831	3001	5000		beta.i[95]	0.001216	0.03166	0.0004803	-0.05915	0.001104	0.06317	3001	5000
Zv9_00032972 Zv9_00032971 Zv9_00032973	3.80217	1.42322	87.9984	11.6532	35.8883	3.66239	1.90768	1.16787		pi.1[4570]	0.5822	0.2436	0.004766	0.04046	0.6111	0.9564	3001	5000		beta.i[4570]	0.001548	0.03191	0.0005117	-0.0603	0.001746	0.06497	3001	5000
Zv9_00051633 Zv9_00051635 Zv9_00051634	39.9963	24.8618	14.7844	6.66665	2.94473	3.9883	4.39879	4.17874		pi.1[7198]	0.4627	0.1864	0.002867	0.04066	0.4831	0.769	3001	5000		beta.i[7198]	0.001911	0.03171	0.0004482	-0.05938	0.001624	0.06633	3001	5000
Zv9_00024048 Zv9_00024047 Zv9_00024046	43.9401	24.3301	1	1	22.1129	22.0183	13.5944	8.78804		pi.1[3336]	0.4444	0.1801	0.003066	0.04068	0.463	0.743	3001	5000		beta.i[3336]	0.002896	0.03125	0.0005361	-0.05808	0.003254	0.06523	3001	5000
Zv9_00058313	1	1	12.1696	98.7756	11.0031	1	1	1		pi.1[8113]	0.6038	0.259	0.005202	0.04074	0.6328	0.9809	3001	5000		beta.i[8113]	0.0003688	0.03151	0.0005056	-0.06145	-9.92e-06	0.06145	3001	5000
Zv9_00006460	32.6137	9.84506	4.58313	6.12638	5.13289	9.65972	9.33775	13.4623		pi.1[903]	0.475	0.1917	0.003154	0.04075	0.4959	0.7818	3001	5000		beta.i[903]	0.0033	0.03235	0.0004329	-0.05862	0.003213	0.06729	3001	5000
Zv9_00049793 Zv9_00049791 Zv9_00049794 Zv9_00049798 Zv9_00049792	2.50718	1.77434	3.04332	3.29492	4.45541	6.6932	15.9247	15.8149		pi.1[6938]	0.6859	0.2628	0.006637	0.04088	0.7528	0.9901	3001	5000		beta.i[6938]	0.0008153	0.03165	0.0004832	-0.06026	0.0006356	0.06339	3001	5000
Zv9_00031426 Zv9_00031429 Zv9_00031428 Zv9_00031427	38.3639	9.19055	8.95632	5.64698	6.5993	8.05238	7.80122	9.29303		pi.1[4359]	0.4688	0.1917	0.002986	0.0409	0.4925	0.7734	3001	5000		beta.i[4359]	0.00285	0.03155	0.0004712	-0.05817	0.002935	0.06357	3001	5000
Zv9_00004042 Zv9_00004041	2.10231	2.16478	2.78852	2.03745	1.53981	32.1688	21.8124	8.62205		pi.1[572]	0.6597	0.2569	0.005422	0.04097	0.7095	0.9866	3001	5000		beta.i[572]	0.0005278	0.03147	0.0005022	-0.06073	0.000614	0.06284	3001	5000
Zv9_00016324	30.5758	12.3729	13.1503	11.4829	3.3198	4.33729	6.30895	7.37202		pi.1[2273]	0.477	0.1923	0.003366	0.04106	0.4971	0.7831	3001	5000		beta.i[2273]	0.002447	0.03103	0.0004872	-0.05662	0.002147	0.06572	3001	5000
Zv9_00016979	12.8784	10.4674	11.3625	24.9695	8.81511	1.31143	1	1		pi.1[2357]	0.5144	0.2146	0.003211	0.04117	0.5409	0.852	3001	5000		beta.i[2357]	0.001262	0.03192	0.000442	-0.06116	0.001291	0.06229	3001	5000
Zv9_00019822 Zv9_00019823 Zv9_00019824 Zv9_00019821 Zv9_00019826 Zv9_00019820 Zv9_00019825	67.2335	30.5093	15.5782	10.0213	7.14138	2.51638	1.52301	1.37938		pi.1[2745]	0.4349	0.1742	0.002473	0.0414	0.4494	0.7219	3001	5000		beta.i[2745]	0.002756	0.03145	0.0004976	-0.05892	0.002731	0.06523	3001	5000
Zv9_00048722	5.28836	1.01305	139.771	68.6178	5.01992	1.05176	1.02898	1		pi.1[6803]	0.5476	0.2305	0.004223	0.04152	0.5734	0.9142	3001	5000		beta.i[6803]	0.001572	0.03187	0.0004947	-0.06233	0.00195	0.06433	3001	5000
Zv9_00038627	48.7456	27.4708	9.76424	4.60652	5.26608	4.52908	4.33029	4.54345		pi.1[5364]	0.4427	0.1855	0.003159	0.04153	0.4626	0.752	3001	5000		beta.i[5364]	0.002071	0.03189	0.0004874	-0.06059	0.002	0.06291	3001	5000
Zv9_00052382	1.05426	1.02979	1.0835	1.30754	3.54654	21.9998	23.7731	5.66071		pi.1[7296]	0.6573	0.2668	0.005513	0.04155	0.7123	0.9888	3001	5000		beta.i[7296]	0.0005806	0.03188	0.0004364	-0.0618	0.0004966	0.06242	3001	5000
Zv9_00022907	1.0623	1.00878	3.14943	18.6869	26.4251	4.46996	3.12054	3.2293		pi.1[3182]	0.6559	0.2647	0.006143	0.04156	0.7119	0.9893	3001	5000		beta.i[3182]	-2.533e-05	0.03154	0.0004546	-0.06171	-9.154e-05	0.06095	3001	5000
Zv9_00002685 Zv9_00002687 Zv9_00002686 Zv9_00002690 Zv9_00002688 Zv9_00002689	71.1538	27.7268	12.8241	7.46811	1	1	27.3647	13.7555		pi.1[384]	0.4205	0.1741	0.003068	0.04173	0.4319	0.7159	3001	5000		beta.i[384]	0.004209	0.0312	0.0005064	-0.05832	0.004226	0.06506	3001	5000
Zv9_00026932 Zv9_00026931	10.1612	6.34035	3.23216	4.9242	3.02562	7.19481	7.27717	95.236		pi.1[3721]	0.5829	0.2187	0.004645	0.04204	0.622	0.8872	3001	5000		beta.i[3721]	0.001521	0.0321	0.0005046	-0.06128	0.001019	0.06437	3001	5000
Zv9_00039726 Zv9_00039727 Zv9_00039728	48.0822	12.4388	3.63032	1.89068	8.93244	16.3132	15.5782	8.02805		pi.1[5515]	0.4423	0.1785	0.002777	0.04216	0.4602	0.7415	3001	5000		beta.i[5515]	0.00335	0.03158	0.0005126	-0.05823	0.00343	0.06578	3001	5000
Zv9_00036614 Zv9_00036613	1.05475	1	1.7004	1.79603	6.96704	15.3208	12.597	9.76093		pi.1[5079]	0.6793	0.2647	0.005454	0.04224	0.7443	0.9918	3001	5000		beta.i[5079]	0.0007973	0.03169	0.0004709	-0.06031	0.0003525	0.06399	3001	5000
Zv9_00051195 Zv9_00051197 Zv9_00051196 Zv9_00051198 Zv9_00051194	1.03139	1	1	1.00587	1.12066	11.057	17.7258	36.0032		pi.1[7144]	0.6982	0.2579	0.005923	0.04232	0.7675	0.9902	3001	5000		beta.i[7144]	0.0001712	0.03171	0.0004467	-0.06134	1.958e-05	0.06398	3001	5000
Zv9_00049547	10.401	44.9896	13.5657	5.52245	2.03028	2.29799	2.89791	3.49499		pi.1[6917]	0.5291	0.2152	0.003378	0.04259	0.5605	0.871	3001	5000		beta.i[6917]	0.00113	0.03107	0.0004323	-0.05958	0.001467	0.06288	3001	5000
Zv9_00036226 Zv9_00036227	8.4473	17.3322	14.6152	30.4128	3.00504	1.14501	1.1541	2.98759		pi.1[5028]	0.5442	0.2168	0.003641	0.0426	0.5707	0.881	3001	5000		beta.i[5028]	0.00132	0.03109	0.0005166	-0.06109	0.00162	0.06004	3001	5000
Zv9_00052075	416.907	58.0608	15.7102	12.0344	1.60174	1.46877	1.47124	1.31706		pi.1[7252]	0.3494	0.1487	0.002347	0.0427	0.3568	0.6136	3001	5000		beta.i[7252]	0.002251	0.03145	0.0006682	-0.05886	0.002468	0.06511	3001	5000
Zv9_00008834	1.24868	1.0391	6.64469	12.2307	14.1794	5.37265	5.66727	2.23086		pi.1[1237]	0.659	0.2634	0.00507	0.04272	0.7155	0.9891	3001	5000		beta.i[1237]	0.0003974	0.03111	0.0005029	-0.06025	0.0005084	0.06096	3001	5000
Zv9_00027857	38.6797	18.108	10.8338	3.78909	3.1913	6.42571	6.1981	7.21221		pi.1[3848]	0.4535	0.1876	0.00291	0.04296	0.4707	0.7624	3001	5000		beta.i[3848]	0.002747	0.03176	0.0004543	-0.05905	0.002524	0.06553	3001	5000
Zv9_00053825	1.62448	1.61642	2.47094	5.09998	12.1804	9.28586	8.62617	5.80787		pi.1[7495]	0.6999	0.2579	0.006361	0.04296	0.7671	0.9922	3001	5000		beta.i[7495]	0.0008927	0.03162	0.0004285	-0.05904	0.0005685	0.06327	3001	5000
Zv9_00005743 Zv9_00005744 Zv9_00005742	1.83127	1.21003	1.09892	1.07763	22.506	13.1591	9.73238	9.05174		pi.1[822]	0.6686	0.2619	0.005211	0.04304	0.722	0.9896	3001	5000		beta.i[822]	0.0004123	0.03185	0.0004622	-0.06137	0.0007099	0.06241	3001	5000
Zv9_00033555	1.96422	2.03349	2.32318	4.50031	12.4903	10.0472	7.1211	6.08439		pi.1[4670]	0.6882	0.2613	0.00512	0.04327	0.7561	0.9899	3001	5000		beta.i[4670]	0.00189	0.03189	0.0004365	-0.06172	0.001603	0.06511	3001	5000
Zv9_00041842 Zv9_00041841 Zv9_00041837 Zv9_00041836 Zv9_00041835 Zv9_00041840 Zv9_00041843 Zv9_00041839 Zv9_00041838	7.72109	8.99036	13.2307	7.19127	9.80137	17.7126	1	1		pi.1[5806]	0.5542	0.2239	0.003765	0.04335	0.5815	0.8936	3001	5000		beta.i[5806]	0.00108	0.03176	0.0004397	-0.06014	0.0004875	0.06462	3001	5000
Zv9_00025049 Zv9_00025048 Zv9_00025046 Zv9_00025047 Zv9_00025045	1.71116	1.02029	1	1	1.16505	17.58	26.7454	17.0015		pi.1[3461]	0.6781	0.2602	0.00593	0.04351	0.7411	0.9901	3001	5000		beta.i[3461]	0.0003268	0.03216	0.0004215	-0.06224	-9.08e-05	0.06395	3001	5000
Zv9_00014747 Zv9_00014750 Zv9_00014746 Zv9_00014748 Zv9_00014745	11.1698	31.3696	16.583	3.07274	4.37277	3.75088	3.33291	3.83511		pi.1[2035]	0.5377	0.2129	0.003734	0.0436	0.5683	0.8586	3001	5000		beta.i[2035]	0.001846	0.03148	0.0004252	-0.05968	0.001988	0.06315	3001	5000
Zv9_00027358 Zv9_00027349 Zv9_00027353 Zv9_00027361 Zv9_00027357 Zv9_00027354 Zv9_00027351 Zv9_00027350 Zv9_00027356 Zv9_00027352 Zv9_00027355 Zv9_00027359	1	1	1	7.15006	20.0055	17.0208	17.8801	1		pi.1[3782]	0.651	0.2543	0.00535	0.04362	0.6984	0.9878	3001	5000		beta.i[3782]	0.0004885	0.03174	0.0004654	-0.06315	0.0004089	0.062	3001	5000
Zv9_00007619 Zv9_00007618	1.0264	1.01487	1.01355	1.06567	1.05484	6.27746	15.1311	59.7671		pi.1[1065]	0.708	0.2563	0.006046	0.04369	0.7784	0.9912	3001	5000		beta.i[1065]	0.0008773	0.03189	0.0004767	-0.06199	0.0005607	0.0638	3001	5000
Zv9_00024076 Zv9_00024075 Zv9_00024077 Zv9_00024074	1	1	1	14.4797	14.0418	6.38667	7.25979	9.64761		pi.1[3339]	0.6792	0.2597	0.006059	0.04373	0.7399	0.9889	3001	5000		beta.i[3339]	0.0001572	0.03156	0.0005232	-0.06148	0.0001311	0.06247	3001	5000
Zv9_00033856 Zv9_00033857 Zv9_00033854 Zv9_00033860 Zv9_00033859 Zv9_00033858 Zv9_00033855 Zv9_00033852 Zv9_00033853	2.20441	1.64363	1.85944	1.59767	3.51942	16.2352	14.9968	10.5213		pi.1[4716]	0.6689	0.262	0.005635	0.04376	0.732	0.9881	3001	5000		beta.i[4716]	0.001138	0.03205	0.000417	-0.06308	0.00107	0.06367	3001	5000
Zv9_00033287 Zv9_00033286	3.87676	1.64335	13.0295	31.4564	9.86787	2.86787	4.02407	3.47577		pi.1[4623]	0.6277	0.2457	0.004819	0.0438	0.6718	0.9657	3001	5000		beta.i[4623]	0.001455	0.03106	0.0004269	-0.05951	0.001158	0.06281	3001	5000
Zv9_00048744	139.999	47.902	5.50444	2.46741	6.74031	8.77469	10.4466	5.48483		pi.1[6807]	0.4047	0.1628	0.002596	0.04382	0.4202	0.6811	3001	5000		beta.i[6807]	0.002498	0.03144	0.0005591	-0.06079	0.003363	0.06298	3001	5000
Zv9_00007006	31.781	11.747	8.11102	7.77847	10.8931	7.25894	4.23427	3.70669		pi.1[981]	0.4724	0.1919	0.003126	0.04412	0.4924	0.7813	3001	5000		beta.i[981]	0.002409	0.03136	0.0005215	-0.05867	0.002588	0.06254	3001	5000
Zv9_00004178 Zv9_00004177 Zv9_00004176	54.1764	35.3684	9.44885	3.45416	6.13336	6.17417	5.38231	2.92863		pi.1[594]	0.4401	0.1801	0.002781	0.0448	0.4553	0.7473	3001	5000		beta.i[594]	0.002733	0.03155	0.0005579	-0.05977	0.003431	0.06338	3001	5000
Zv9_00034386	2.19435	1.88903	7.6621	21.2846	8.87483	4.27248	4.66226	2.28723		pi.1[4787]	0.6681	0.2593	0.005548	0.04485	0.7217	0.9879	3001	5000		beta.i[4787]	0.001559	0.0314	0.0004356	-0.06104	0.001289	0.06294	3001	5000
Zv9_00053234 Zv9_00053233	30.9106	18.7299	14.9589	4.67166	1.44653	3.77849	7.72964	11.0142		pi.1[7412]	0.466	0.1935	0.002986	0.0451	0.4857	0.7826	3001	5000		beta.i[7412]	0.002527	0.03151	0.000481	-0.05748	0.002472	0.06495	3001	5000
Zv9_00030411 Zv9_00030409 Zv9_00030410 Zv9_00030413 Zv9_00030408	12.2246	23.8958	9.60293	2.98063	4.29565	5.95505	5.27888	4.04811		pi.1[4209]	0.5281	0.2169	0.003592	0.04516	0.5591	0.8598	3001	5000		beta.i[4209]	0.001557	0.03189	0.0004538	-0.06073	0.001205	0.06426	3001	5000
Zv9_00007038 Zv9_00007037 Zv9_00007039	2.9191	2.54473	2.448	4.24487	4.16303	9.91433	12.7661	10.914		pi.1[987]	0.6777	0.2571	0.005716	0.04524	0.7412	0.9848	3001	5000		beta.i[987]	0.001301	0.03185	0.0004928	-0.05956	0.001224	0.06408	3001	5000
Zv9_00037448 Zv9_00037449	1	1	2.13944	2.92395	1.62456	13.3402	17.4857	23.6011		pi.1[5199]	0.6929	0.2592	0.005714	0.04524	0.7572	0.9932	3001	5000		beta.i[5199]	2.52e-06	0.03158	0.0005373	-0.05994	-2.582e-05	0.06243	3001	5000
Zv9_00050195	1.03676	1.05519	1.00229	1.02625	1.23873	21.0146	27.8268	16.3997		pi.1[7001]	0.6743	0.2627	0.006036	0.04525	0.7399	0.9903	3001	5000		beta.i[7001]	0.0008532	0.03077	0.0004096	-0.05923	0.001056	0.06194	3001	5000
Zv9_00010065	1	1.48409	6.74622	15.2076	6.33519	7.48115	4.60386	9.04249		pi.1[1448]	0.6944	0.259	0.005828	0.0454	0.7584	0.9913	3001	5000		beta.i[1448]	0.001539	0.03133	0.0005011	-0.06041	0.001198	0.06366	3001	5000
Zv9_00020117	1.45224	1.26208	17.2988	27.6351	10.4987	3.31704	2.82433	1.66048		pi.1[2792]	0.6599	0.2601	0.006378	0.04555	0.7117	0.9859	3001	5000		beta.i[2792]	0.001179	0.03203	0.000499	-0.06293	0.001171	0.06499	3001	5000
Zv9_00037925	2.38014	1.0029	45.0124	28.2161	10.0813	2.44528	1.93008	1.91856		pi.1[5279]	0.6339	0.257	0.005995	0.0456	0.6774	0.9839	3001	5000		beta.i[5279]	0.0005514	0.03176	0.0004933	-0.06198	0.0005687	0.06434	3001	5000
Zv9_00043611 Zv9_00043613 Zv9_00043612 Zv9_00043610	1	1	1.00336	1.03541	2.56844	7.63927	15.1694	34.4413		pi.1[6029]	0.7109	0.2593	0.006178	0.04562	0.7827	0.9916	3001	5000		beta.i[6029]	0.0004946	0.03237	0.0005143	-0.06266	0.0005724	0.06262	3001	5000
Zv9_00021418 Zv9_00021417	1.37935	2.43264	6.7319	18.0829	10.9952	4.45384	3.51689	2.8463		pi.1[2985]	0.6896	0.2593	0.005826	0.04565	0.7531	0.9925	3001	5000		beta.i[2985]	0.0001101	0.03173	0.0004705	-0.06026	0.0002961	0.06207	3001	5000
Zv9_00003744	1	1	1.16381	1.33885	1.31122	9.08286	8.84603	182.981		pi.1[531]	0.7194	0.2586	0.00583	0.04594	0.7956	0.9928	3001	5000		beta.i[531]	0.0005322	0.03191	0.0005933	-0.06349	0.000673	0.06221	3001	5000
Zv9_00055084 Zv9_00055083	48.0911	14.8754	7.94313	4.37232	4.87343	8.78146	7.30979	9.84144		pi.1[7645]	0.4528	0.1836	0.002702	0.04599	0.4724	0.7575	3001	5000		beta.i[7645]	0.001999	0.03174	0.0005374	-0.06003	0.002376	0.06471	3001	5000
Zv9_00044658 Zv9_00044659 Zv9_00044660	7.32526	12.9745	13.5849	15.6894	6.43901	1.45657	1.24112	1.10495		pi.1[6206]	0.5677	0.2247	0.003315	0.04608	0.6006	0.8957	3001	5000		beta.i[6206]	0.001579	0.03221	0.0004615	-0.06153	0.00193	0.06551	3001	5000
Zv9_00052846	1	1	1	1	1.20412	36.9917	28.5295	11.1019		pi.1[7361]	0.6651	0.2589	0.005775	0.04608	0.7191	0.9881	3001	5000		beta.i[7361]	0.0003535	0.03199	0.0004603	-0.0628	0.001006	0.06512	3001	5000
Zv9_00004091	39.7029	32.6537	11.4221	4.17436	5.1704	6.93049	4.87114	2.98138		pi.1[578]	0.4628	0.1863	0.003352	0.04626	0.4822	0.7667	3001	5000		beta.i[578]	0.002466	0.03157	0.000436	-0.05751	0.002539	0.06547	3001	5000
Zv9_00051663	1.14887	1.08571	1.15099	1.23108	1.92283	26.8051	22.5821	11.979		pi.1[7203]	0.6872	0.2558	0.005315	0.04634	0.7449	0.992	3001	5000		beta.i[7203]	0.0006007	0.03148	0.0004531	-0.06082	0.0005001	0.06111	3001	5000
Zv9_00041570	1	1.00279	1	2.15073	11.7225	12.338	14.7542	8.56187		pi.1[5761]	0.6823	0.2565	0.005248	0.04686	0.7421	0.9902	3001	5000		beta.i[5761]	-0.0005516	0.03125	0.0004747	-0.06146	-0.0008441	0.06179	3001	5000
Zv9_00040416 Zv9_00040417	1.82731	1.4029	19.3896	29.0298	12.1128	1.31007	3.87859	4.92356		pi.1[5606]	0.6619	0.261	0.006137	0.04688	0.7195	0.9872	3001	5000		beta.i[5606]	0.0002073	0.03093	0.0005185	-0.06265	0.00117	0.06015	3001	5000
Zv9_00029715	11.6574	14.3645	22.0431	10.8716	1.09657	2.91396	5.39797	6.292		pi.1[4109]	0.5317	0.2131	0.003506	0.04712	0.5567	0.8577	3001	5000		beta.i[4109]	0.001575	0.03101	0.0004425	-0.05963	0.001588	0.06221	3001	5000
Zv9_00034963	112.182	9.50034	4.89516	5.27407	12.0668	14.9606	13.6016	8.25063		pi.1[4860]	0.4168	0.1654	0.002486	0.04741	0.4311	0.6945	3001	5000		beta.i[4860]	0.003198	0.0312	0.0005076	-0.0579	0.003263	0.06532	3001	5000
Zv9_00029927	2.23016	2.01327	1.25417	1.15095	1.54486	8.3298	14.5418	43.919		pi.1[4142]	0.6978	0.2614	0.005085	0.04767	0.7685	0.9899	3001	5000		beta.i[4142]	7.39e-05	0.03153	0.0005099	-0.06106	0.0003816	0.06144	3001	5000
Zv9_00045505	2.3881	2.32154	2.19549	1.9151	1.69522	16.2224	18.4457	20.4557		pi.1[6346]	0.6919	0.254	0.006561	0.04774	0.7535	0.9903	3001	5000		beta.i[6346]	0.0002	0.0313	0.0004513	-0.06119	0.000364	0.06128	3001	5000
Zv9_00006418 Zv9_00006416 Zv9_00006414 Zv9_00006417 Zv9_00006413 Zv9_00006415 Zv9_00006412	4.91778	5.20001	11.3202	11.5715	4.01046	2.21552	2.70876	68.1822		pi.1[897]	0.6377	0.2403	0.004814	0.04807	0.6902	0.9578	3001	5000		beta.i[897]	0.001974	0.03156	0.0004731	-0.05892	0.002163	0.06322	3001	5000
Zv9_00030073 Zv9_00030072 Zv9_00030074	156.861	31.6912	22.6681	9.00757	1.47419	2.84793	7.10666	6.31079		pi.1[4157]	0.4029	0.1588	0.002516	0.0482	0.4164	0.6759	3001	5000		beta.i[4157]	0.0034	0.03145	0.0005751	-0.05793	0.003519	0.06451	3001	5000
Zv9_00003919	7.08301	7.84298	11.5465	21.5622	2.22054	3.32156	3.51502	21.1608		pi.1[556]	0.5884	0.2267	0.004005	0.04827	0.6247	0.9107	3001	5000		beta.i[556]	0.001501	0.03176	0.0004266	-0.05956	0.001487	0.06358	3001	5000
Zv9_00036118 Zv9_00036117	24.576	15.115	11.1693	7.66814	6.68131	4.62773	4.55739	3.90566		pi.1[5012]	0.4977	0.1941	0.003179	0.04828	0.524	0.8059	3001	5000		beta.i[5012]	0.002017	0.03224	0.0004653	-0.06085	0.001712	0.06612	3001	5000
Zv9_00016508 Zv9_00016511 Zv9_00016507 Zv9_00016510 Zv9_00016509 Zv9_00016512	18.777	13.7294	21.8059	13.8002	2.77109	3.02409	3.35072	5.66277		pi.1[2293]	0.5076	0.2011	0.00363	0.04853	0.5333	0.8224	3001	5000		beta.i[2293]	0.002702	0.03226	0.0004268	-0.06075	0.002821	0.0654	3001	5000
Zv9_00020552	10.5044	4.76613	4.92527	3.65624	1.84818	12.4118	20.2206	20.2326		pi.1[2868]	0.5656	0.2209	0.004235	0.04865	0.6009	0.8799	3001	5000		beta.i[2868]	0.002399	0.03132	0.0005225	-0.05879	0.002721	0.0654	3001	5000
Zv9_00051480 Zv9_00051481	1	1	1.03286	1.01171	5.10059	9.81892	12.2919	25.3984		pi.1[7180]	0.7038	0.2624	0.007426	0.04873	0.7753	0.9925	3001	5000		beta.i[7180]	0.0005961	0.03124	0.0004692	-0.05939	0.0008149	0.05908	3001	5000
Zv9_00050067 Zv9_00050064 Zv9_00050065 Zv9_00050066	4.38624	23.6989	27.1117	8.94598	1.79494	1.469	1.21354	1.23699		pi.1[6978]	0.598	0.2376	0.003599	0.04876	0.6335	0.9427	3001	5000		beta.i[6978]	0.0009627	0.03155	0.0004628	-0.06289	0.0005589	0.06266	3001	5000
Zv9_00023755	62.2875	31.2857	20.7	4.19076	1.25835	5.68536	7.94799	3.6561		pi.1[3302]	0.4275	0.1766	0.002461	0.04885	0.4425	0.7222	3001	5000		beta.i[3302]	0.00264	0.03116	0.0005564	-0.0573	0.002268	0.06552	3001	5000
Zv9_00008873	1.45793	1.83814	15.2164	16.3866	11.8279	3.82124	3.29305	1.6521		pi.1[1253]	0.6761	0.2528	0.005682	0.04892	0.7319	0.9862	3001	5000		beta.i[1253]	0.0002258	0.03156	0.0004719	-0.06156	0.0002405	0.06228	3001	5000
Zv9_00033737 Zv9_00033738	2.15111	4.53903	7.19305	7.69026	16.3989	15.064	1	1		pi.1[4696]	0.6548	0.2535	0.005299	0.04899	0.7043	0.9843	3001	5000		beta.i[4696]	0.0005185	0.03159	0.0004555	-0.06091	0.0006282	0.06344	3001	5000
Zv9_00046985	25.6624	10.5262	12.8846	17.532	8.68237	2.44763	1.73763	1.93065		pi.1[6551]	0.4687	0.194	0.002606	0.04902	0.4903	0.7916	3001	5000		beta.i[6551]	0.002625	0.03128	0.0005318	-0.05901	0.002467	0.06355	3001	5000
Zv9_00030255	1.24206	1.09276	1.04652	1.01674	1.32883	15.7063	22.3236	24.6155		pi.1[4181]	0.6917	0.2561	0.005729	0.04909	0.7554	0.9903	3001	5000		beta.i[4181]	0.0006144	0.03195	0.0004172	-0.06109	0.0005272	0.0634	3001	5000
Zv9_00033062 Zv9_00033063 Zv9_00033061	145.736	24.1655	10.253	11.3876	1	9.95682	9.4673	11.1743		pi.1[4584]	0.395	0.1659	0.00286	0.04912	0.4072	0.6803	3001	5000		beta.i[4584]	0.002917	0.03133	0.0005219	-0.05953	0.003027	0.06339	3001	5000
Zv9_00014262 Zv9_00014263	19.5346	17.4108	11.7053	8.1975	2.72918	4.93119	5.23444	4.9982		pi.1[1978]	0.5033	0.2008	0.002887	0.04921	0.5304	0.8114	3001	5000		beta.i[1978]	0.002327	0.03141	0.0005483	-0.05873	0.001887	0.06471	3001	5000
Zv9_00036582 Zv9_00036588 Zv9_00036590 Zv9_00036583 Zv9_00036587 Zv9_00036589 Zv9_00036584	21.3918	1	1	1	58.9485	27.2781	21.5154	13.0767		pi.1[5074]	0.4689	0.1966	0.003442	0.04936	0.4847	0.796	3001	5000		beta.i[5074]	0.00167	0.03133	0.0004636	-0.06067	0.00186	0.0625	3001	5000
Zv9_00001873 Zv9_00001875 Zv9_00001874	2.79502	2.24364	2.38957	1.98444	4.90354	9.6087	10.4263	14.5884		pi.1[260]	0.6665	0.2638	0.005809	0.04948	0.7299	0.9876	3001	5000		beta.i[260]	0.001843	0.03199	0.0004329	-0.06033	0.001823	0.0639	3001	5000
Zv9_00009584 Zv9_00009583	15.4738	23.027	26.1773	13.0727	2.43651	1	1	1		pi.1[1373]	0.515	0.203	0.00402	0.04964	0.5422	0.8308	3001	5000		beta.i[1373]	0.001396	0.03149	0.0004449	-0.06097	0.001593	0.06285	3001	5000
Zv9_00049125	179.923	88.9628	14.2323	6.25789	1.30847	1.06905	1.05026	1.1616		pi.1[6861]	0.3903	0.1585	0.002041	0.04973	0.3996	0.6652	3001	5000		beta.i[6861]	0.002327	0.03193	0.0005312	-0.05958	0.002432	0.06613	3001	5000
Zv9_00037926	5.06667	19.2665	7.77075	4.90319	3.48413	5.22507	5.66548	8.34024		pi.1[5280]	0.6174	0.2319	0.004235	0.04992	0.6599	0.9421	3001	5000		beta.i[5280]	0.001022	0.03178	0.0005326	-0.05897	0.0008438	0.06421	3001	5000
Zv9_00044948 Zv9_00044946 Zv9_00044947 Zv9_00044945	37.8976	11.8504	14.2601	7.00093	5.99814	4.97904	5.00663	7.91755		pi.1[6251]	0.4622	0.1881	0.002722	0.05011	0.4828	0.7676	3001	5000		beta.i[6251]	0.002587	0.03161	0.0004967	-0.0591	0.00271	0.06506	3001	5000
Zv9_00046684 Zv9_00046685	58.9831	28.477	8.87951	7.15751	5.08495	4.72147	7.62517	4.05264		pi.1[6511]	0.4458	0.1803	0.002941	0.05027	0.465	0.7432	3001	5000		beta.i[6511]	0.003239	0.03177	0.0004726	-0.05783	0.002734	0.06601	3001	5000
Zv9_00057322 Zv9_00057323	7.52213	17.5808	20.0217	11.4243	2.17582	1.77487	2.13189	5.83602		pi.1[7944]	0.5656	0.2235	0.003404	0.05031	0.5989	0.898	3001	5000		beta.i[7944]	0.001641	0.03174	0.0004618	-0.06069	0.002174	0.06425	3001	5000
Zv9_00044900 Zv9_00044899 Zv9_00044901	32.7594	12.6609	5.93833	2.42462	10.9724	8.33292	9.2628	12.1851		pi.1[6243]	0.4765	0.1893	0.00275	0.05061	0.4953	0.7812	3001	5000		beta.i[6243]	0.003025	0.03173	0.0005073	-0.0596	0.004012	0.06521	3001	5000
Zv9_00031706 Zv9_00031702 Zv9_00031703 Zv9_00031705 Zv9_00031704	1.56598	2.40502	2.09809	8.62049	15.3316	9.15108	6.39213	4.56922		pi.1[4406]	0.685	0.2592	0.004587	0.05069	0.7465	0.9911	3001	5000		beta.i[4406]	0.0009764	0.03185	0.0004251	-0.06274	0.001698	0.06205	3001	5000
Zv9_00031379 Zv9_00031378	2.50493	3.6879	3.54355	4.24808	1.69326	6.57931	7.00078	97.0201		pi.1[4346]	0.7008	0.2571	0.006839	0.05092	0.7648	0.9894	3001	5000		beta.i[4346]	0.00132	0.03129	0.0004565	-0.06038	0.0008943	0.06371	3001	5000
Zv9_00022315 Zv9_00022312 Zv9_00022313 Zv9_00022314	2.6795	3.62331	2.93415	1.69398	7.03084	13.2287	12.1617	7.91431		pi.1[3094]	0.6792	0.2543	0.004947	0.05106	0.7378	0.9879	3001	5000		beta.i[3094]	0.00149	0.03153	0.0004576	-0.06026	0.001715	0.06208	3001	5000
Zv9_00037032 Zv9_00037030 Zv9_00037031 Zv9_00037033	12.3787	26.4495	19.3279	14.1064	1	5.11318	4.13217	4.06845		pi.1[5141]	0.5309	0.2057	0.002933	0.05123	0.5568	0.8552	3001	5000		beta.i[5141]	0.002803	0.03197	0.0005672	-0.0594	0.003494	0.06471	3001	5000
Zv9_00045004 Zv9_00045006 Zv9_00045005	10.5703	5.51432	5.08482	3.8298	1.75837	14.7643	20.8736	14.9023		pi.1[6267]	0.5589	0.2141	0.003503	0.05129	0.5936	0.8777	3001	5000		beta.i[6267]	0.002136	0.0315	0.000497	-0.05896	0.002276	0.0649	3001	5000
Zv9_00015484 Zv9_00015483	1.13339	1.68957	2.32595	1.33411	1.16679	9.3889	21.6882	26.7649		pi.1[2138]	0.6939	0.2626	0.005445	0.0513	0.7594	0.9918	3001	5000		beta.i[2138]	3.976e-05	0.03153	0.0004857	-0.06101	8.811e-05	0.06194	3001	5000
Zv9_00046666	8.87813	13.7032	17.0585	13.613	5.63607	1.73023	1.30974	1.12123		pi.1[6509]	0.5582	0.2191	0.004078	0.05142	0.5924	0.8845	3001	5000		beta.i[6509]	0.001736	0.03134	0.0004428	-0.05961	0.001896	0.06306	3001	5000
Zv9_00001985	1	1	6.57271	51.7015	18.0039	4.44812	1	1		pi.1[277]	0.6464	0.2569	0.004958	0.05149	0.6918	0.9863	3001	5000		beta.i[277]	0.000317	0.03198	0.0004329	-0.06174	0.0008039	0.06309	3001	5000
Zv9_00025400	288.951	79.5082	20.9686	4.47311	1.18304	1.01623	1	1		pi.1[3506]	0.3696	0.1504	0.00218	0.05149	0.3782	0.6355	3001	5000		beta.i[3506]	0.001641	0.03199	0.0006562	-0.0602	0.001751	0.0641	3001	5000
Zv9_00024778	1.43305	1.15108	1.22575	1.68668	20.8436	15.1401	11.0829	6.3225		pi.1[3423]	0.6778	0.259	0.006951	0.05156	0.7338	0.9903	3001	5000		beta.i[3423]	0.0005992	0.03213	0.00048	-0.06222	0.0001801	0.06475	3001	5000
Zv9_00018030	1	1	1	1.01229	1.37481	18.9242	24.9712	17.1585		pi.1[2500]	0.6781	0.2577	0.005291	0.05157	0.735	0.9884	3001	5000		beta.i[2500]	0.0007332	0.03197	0.0004948	-0.06183	0.001022	0.06277	3001	5000
Zv9_00024478 Zv9_00024475 Zv9_00024477 Zv9_00024476	3.25999	1.22302	72.765	65.4454	3.51184	1.7309	1.41792	1.018		pi.1[3393]	0.5864	0.2433	0.004633	0.05164	0.6126	0.9618	3001	5000		beta.i[3393]	0.0006904	0.03228	0.0005176	-0.0629	0.0006248	0.06324	3001	5000
Zv9_00037092	19.2784	16.5521	9.86183	7.021	6.34933	4.58819	4.27351	3.60943		pi.1[5155]	0.5065	0.202	0.002829	0.05172	0.5333	0.8238	3001	5000		beta.i[5155]	0.002455	0.0321	0.0004679	-0.06067	0.002699	0.06465	3001	5000
Zv9_00056816	1	1	1	1	1.01044	1.73093	6.18324	1573.28		pi.1[7868]	0.7429	0.2588	0.005771	0.05177	0.8229	0.9945	3001	5000		beta.i[7868]	0.001459	0.03146	0.0008215	-0.06001	0.001676	0.06317	3001	5000
Zv9_00018728 Zv9_00018729	27.8082	29.6131	10.9265	3.02167	4.87506	5.63535	4.92821	4.76524		pi.1[2605]	0.4829	0.1939	0.003065	0.0518	0.5032	0.7956	3001	5000		beta.i[2605]	0.002298	0.03132	0.0003907	-0.05922	0.001782	0.06366	3001	5000
Zv9_00051369 Zv9_00051374	4.34081	2.44921	2.16698	3.13572	8.0797	9.23529	11.12	15.686		pi.1[7165]	0.6483	0.2446	0.004522	0.05185	0.6962	0.967	3001	5000		beta.i[7165]	0.001681	0.03158	0.0004793	-0.0606	0.001778	0.06263	3001	5000
Zv9_00018524 Zv9_00018523	1.18943	1.07239	1.2122	1.01373	1.17445	23.0052	20.8383	19.0838		pi.1[2580]	0.6725	0.2579	0.005031	0.05214	0.7279	0.9901	3001	5000		beta.i[2580]	0.001294	0.03143	0.0004643	-0.0602	0.0009498	0.06213	3001	5000
Zv9_00046315 Zv9_00046314 Zv9_00046313	1.16463	1.07079	1.2167	3.12243	21.2077	11.3889	8.48535	8.33688		pi.1[6457]	0.6803	0.2581	0.005429	0.05217	0.7412	0.9916	3001	5000		beta.i[6457]	0.0004265	0.03114	0.000402	-0.06111	0.0008818	0.06047	3001	5000
Zv9_00054829	1.5127	1.37611	1.71386	3.82579	5.5669	9.6526	10.2774	13.5478		pi.1[7612]	0.6985	0.261	0.005581	0.05239	0.7663	0.9921	3001	5000		beta.i[7612]	0.0007323	0.03184	0.0004294	-0.06226	0.0003454	0.06249	3001	5000
Zv9_00044117	1.20001	1.14969	1.08981	1.08315	21.0698	18.9387	12.6719	7.1826		pi.1[6110]	0.6768	0.2524	0.005647	0.05246	0.7347	0.9906	3001	5000		beta.i[6110]	0.0007923	0.03107	0.0004565	-0.06074	0.00127	0.06217	3001	5000
Zv9_00005738	1	1	1	1	12.2453	16.1337	16.1368	5.97205		pi.1[820]	0.6658	0.2623	0.005386	0.05247	0.7234	0.991	3001	5000		beta.i[820]	-0.0001826	0.03126	0.0005146	-0.06146	0.0003636	0.06015	3001	5000
Zv9_00005014	16.0591	11.4143	21.3076	19.1221	1.27259	1.68387	3.44283	31.6843		pi.1[723]	0.5177	0.2041	0.003947	0.05255	0.5393	0.8403	3001	5000		beta.i[723]	0.002815	0.03205	0.000495	-0.05949	0.002946	0.06537	3001	5000
Zv9_00058403 Zv9_00058402	37.3891	20.278	20.0003	10.0139	5.64026	2.56323	2.36209	3.31665		pi.1[8122]	0.4743	0.1851	0.002395	0.0526	0.4937	0.7755	3001	5000		beta.i[8122]	0.002451	0.03152	0.0004815	-0.05881	0.002186	0.06557	3001	5000
Zv9_00003805	21.999	15.2751	20.7714	8.97393	4.77165	3.29786	2.37609	2.44551		pi.1[540]	0.4942	0.1974	0.003555	0.05261	0.514	0.8086	3001	5000		beta.i[540]	0.002294	0.03154	0.0004448	-0.05912	0.002395	0.06286	3001	5000
Zv9_00040276 Zv9_00040277	35.4132	18.0766	21.1663	5.88252	5.91413	4.34758	3.43335	2.35154		pi.1[5588]	0.4643	0.1862	0.002629	0.05275	0.4851	0.7656	3001	5000		beta.i[5588]	0.003251	0.03183	0.0005231	-0.05779	0.002939	0.06688	3001	5000
Zv9_00012173 Zv9_00012172 Zv9_00012170 Zv9_00012171	34.677	13.186	13.8358	8.69006	4.90503	5.77077	4.90938	5.21635		pi.1[1730]	0.4761	0.1871	0.003081	0.05279	0.4983	0.7742	3001	5000		beta.i[1730]	0.001877	0.03135	0.0004701	-0.05906	0.001981	0.06382	3001	5000
Zv9_00032416	33.3518	12.6562	4.79461	4.84672	6.21557	10.7678	9.16282	15.7932		pi.1[4500]	0.486	0.1888	0.00275	0.0528	0.5102	0.7848	3001	5000		beta.i[4500]	0.002633	0.03144	0.0004806	-0.05851	0.002228	0.06456	3001	5000
Zv9_00010225 Zv9_00010223 Zv9_00010224 Zv9_00010222	75.525	28.8403	6.69258	3.95024	8.61452	7.02645	5.38307	5.62697		pi.1[1478]	0.4281	0.1745	0.002764	0.05302	0.4434	0.7269	3001	5000		beta.i[1478]	0.002488	0.03149	0.0005207	-0.0591	0.00203	0.06465	3001	5000
Zv9_00013579	8.27814	16.1629	27.5562	7.61333	4.15781	2.86615	2.84576	2.24905		pi.1[1896]	0.5693	0.2179	0.00399	0.05311	0.6036	0.8879	3001	5000		beta.i[1896]	0.001816	0.03183	0.0004974	-0.06092	0.001903	0.0638	3001	5000
Zv9_00019671 Zv9_00019672 Zv9_00019670	3.70708	2.82446	1	2.69764	10.7068	16.937	10.5087	9.854		pi.1[2732]	0.6598	0.2439	0.005426	0.05326	0.7107	0.9761	3001	5000		beta.i[2732]	0.0009655	0.03131	0.0004836	-0.06169	0.0009735	0.06246	3001	5000
Zv9_00041139	24.1868	6.89725	8.85061	8.87478	2.30656	5.42579	8.6455	34.998		pi.1[5705]	0.4993	0.1957	0.003086	0.05339	0.5212	0.8103	3001	5000		beta.i[5705]	0.00245	0.0316	0.0004034	-0.06005	0.002192	0.06463	3001	5000
Zv9_00013706 Zv9_00013705	1.41876	1.7354	1.8871	5.58732	14.6859	7.32417	7.8845	10.6312		pi.1[1912]	0.6967	0.2563	0.006759	0.05344	0.7626	0.9908	3001	5000		beta.i[1912]	0.0003834	0.03117	0.0004616	-0.06059	0.0004441	0.06223	3001	5000
Zv9_00001830 Zv9_00001827 Zv9_00001829 Zv9_00001828	1.10873	1.11	1.16905	1.1373	1.28492	28.6031	20.1035	17.3871		pi.1[255]	0.6771	0.2595	0.005794	0.05349	0.7341	0.9899	3001	5000		beta.i[255]	4.563e-05	0.03155	0.0004931	-0.06312	-0.0004425	0.06105	3001	5000
Zv9_00001070	1.35311	1.04304	13.5346	19.051	14.7795	5.02523	2.70946	2.60768		pi.1[160]	0.6787	0.2587	0.006499	0.05355	0.736	0.9906	3001	5000		beta.i[160]	0.0009024	0.03138	0.0004382	-0.06023	0.000677	0.06283	3001	5000
Zv9_00053613	1	1	1	1	1.18456	13.1808	25.9376	20.3099		pi.1[7463]	0.6888	0.2588	0.005619	0.05381	0.7509	0.9906	3001	5000		beta.i[7463]	0.000306	0.03245	0.0004931	-0.06309	-1.788e-05	0.06466	3001	5000
Zv9_00045702	24.2284	22.2828	10.2121	4.86698	2.87705	5.17162	7.38493	10.3641		pi.1[6375]	0.5008	0.1934	0.003395	0.05441	0.5229	0.81	3001	5000		beta.i[6375]	0.002528	0.03238	0.0005125	-0.06166	0.002561	0.06558	3001	5000
Zv9_00053551	3.05085	2.69161	2.53186	3.40268	1.585	20.7634	12.7792	27.5939		pi.1[7455]	0.6783	0.2518	0.005251	0.05467	0.7425	0.9858	3001	5000		beta.i[7455]	0.001983	0.03155	0.0004013	-0.05877	0.002273	0.06416	3001	5000
Zv9_00051561 Zv9_00051563 Zv9_00051565 Zv9_00051562 Zv9_00051564	39.7653	13.6273	7.92879	4.80416	6.51092	7.41129	7.0952	7.68457		pi.1[7191]	0.4627	0.1865	0.003057	0.05492	0.4829	0.7689	3001	5000		beta.i[7191]	0.00269	0.03145	0.0004599	-0.05927	0.002726	0.06618	3001	5000
Zv9_00028516 Zv9_00028514 Zv9_00028515	86.3882	39.9477	30.0867	7.41552	1.44078	1.15868	1.07481	1.31953		pi.1[3941]	0.4166	0.1676	0.002573	0.05541	0.4288	0.7079	3001	5000		beta.i[3941]	0.003375	0.03157	0.0005466	-0.05782	0.002914	0.06562	3001	5000
Zv9_00007172	3.15948	5.52978	5.67031	2.80396	2.46415	7.49818	13.256	16.7711		pi.1[1009]	0.6787	0.2522	0.005772	0.0555	0.7401	0.9806	3001	5000		beta.i[1009]	0.001557	0.0308	0.0004739	-0.05975	0.001254	0.06317	3001	5000
Zv9_00051154	65.3711	6.32285	6.2151	7.62804	14.2547	11.01	9.67563	6.92557		pi.1[7137]	0.4369	0.1758	0.002474	0.05555	0.4555	0.732	3001	5000		beta.i[7137]	0.002869	0.03178	0.0005814	-0.0589	0.00247	0.06617	3001	5000
Zv9_00034323	1	1.01828	1	1.03311	1.47153	6.00884	17.8605	46.636		pi.1[4780]	0.7117	0.2541	0.00522	0.05557	0.7841	0.9927	3001	5000		beta.i[4780]	0.001284	0.0313	0.0004992	-0.05978	0.00137	0.06158	3001	5000
Zv9_00008926	1.35368	1	9.65953	19.3905	8.72667	5.41352	5.66483	3.37272		pi.1[1267]	0.6781	0.2545	0.00617	0.05622	0.7313	0.9889	3001	5000		beta.i[1267]	0.001521	0.03088	0.0004977	-0.0581	0.001445	0.06163	3001	5000
Zv9_00030792	1	1	1.44575	7.25711	8.99858	8.41757	8.23625	10.9042		pi.1[4259]	0.6883	0.2577	0.004739	0.05622	0.7519	0.9907	3001	5000		beta.i[4259]	0.0008867	0.03209	0.0004276	-0.06143	0.001079	0.06317	3001	5000
Zv9_00052815 Zv9_00052819 Zv9_00052816 Zv9_00052821 Zv9_00052818 Zv9_00052820 Zv9_00052814 Zv9_00052817	8.72372	19.8775	17.6176	8.45699	2.08454	2.69406	2.36558	15.6169		pi.1[7358]	0.5653	0.2207	0.003789	0.05661	0.5974	0.8885	3001	5000		beta.i[7358]	0.001422	0.03158	0.0005305	-0.06027	0.001014	0.06389	3001	5000
Zv9_00037625 Zv9_00037624	129.277	20.684	9.19695	5.05944	7.98448	8.57157	10.6328	3.493		pi.1[5233]	0.4107	0.1618	0.002598	0.05669	0.4258	0.6835	3001	5000		beta.i[5233]	0.003311	0.03219	0.0005425	-0.05993	0.003191	0.06525	3001	5000
Zv9_00057211	49.2921	30.372	9.88992	4.78277	2.02941	3.67921	6.49798	9.17953		pi.1[7919]	0.4486	0.181	0.002581	0.05684	0.4641	0.7538	3001	5000		beta.i[7919]	0.002572	0.03091	0.0004792	-0.05808	0.002268	0.06453	3001	5000
Zv9_00035462 Zv9_00035459 Zv9_00035463 Zv9_00035461 Zv9_00035464 Zv9_00035466 Zv9_00035460 Zv9_00035465	1	1	11.7862	50.7609	29.1587	1	1	1		pi.1[4922]	0.6272	0.2543	0.005021	0.05697	0.6649	0.9843	3001	5000		beta.i[4922]	5.65e-05	0.03175	0.0004606	-0.0627	0.0004626	0.06176	3001	5000
Zv9_00040601 Zv9_00040602 Zv9_00040600 Zv9_00040604 Zv9_00040603 Zv9_00040606	22.4756	23.3714	11.3751	4.76886	1.95366	4.26463	5.02311	9.89117		pi.1[5629]	0.4942	0.1969	0.003208	0.05702	0.5157	0.8039	3001	5000		beta.i[5629]	0.002682	0.03138	0.0004764	-0.05781	0.002987	0.06338	3001	5000
Zv9_00037696	1.40963	1.45526	1.92736	4.20127	8.24757	9.95821	9.71166	6.96586		pi.1[5247]	0.6851	0.2627	0.006491	0.05706	0.7484	0.991	3001	5000		beta.i[5247]	0.0007799	0.03173	0.0004962	-0.06049	0.001012	0.06327	3001	5000
Zv9_00015335	24.2891	13.4656	3.4841	3.29651	2.57014	8.54678	14.5015	39.9375		pi.1[2119]	0.5138	0.1978	0.00355	0.0573	0.5403	0.8155	3001	5000		beta.i[2119]	0.002517	0.03237	0.0005861	-0.06051	0.002921	0.06585	3001	5000
Zv9_00018288	1	1	1.00152	4.0704	56.0306	21.1853	4.74322	1.05099		pi.1[2541]	0.6298	0.2584	0.004975	0.05739	0.6732	0.9851	3001	5000		beta.i[2541]	0.0007537	0.03162	0.0004687	-0.06234	0.001431	0.06294	3001	5000
Zv9_00021182 Zv9_00021178 Zv9_00021180 Zv9_00021179 Zv9_00021183 Zv9_00021181	32.7673	15.9253	14.1756	7.38316	4.60557	4.63128	5.35433	3.33144		pi.1[2944]	0.4695	0.1886	0.002871	0.0577	0.4893	0.7786	3001	5000		beta.i[2944]	0.002738	0.03138	0.000496	-0.05794	0.002455	0.06488	3001	5000
Zv9_00011521	1.09788	1.05041	1.34973	16.1032	9.47753	9.85514	7.77779	7.86489		pi.1[1658]	0.6784	0.2567	0.005708	0.05772	0.7371	0.9878	3001	5000		beta.i[1658]	0.001522	0.03185	0.0005558	-0.06201	0.002224	0.06159	3001	5000
Zv9_00028086 Zv9_00028085 Zv9_00028087	34.7091	13.4282	20.5298	9.46638	2.29722	6.7597	6.9513	5.69703		pi.1[3870]	0.4724	0.1868	0.002967	0.05795	0.4911	0.7748	3001	5000		beta.i[3870]	0.003223	0.03141	0.0005001	-0.05952	0.003301	0.06516	3001	5000
Zv9_00054626 Zv9_00054625 Zv9_00054624	28.4689	40.8573	28.6228	5.8283	1.40289	1.48031	1.64759	4.82935		pi.1[7584]	0.4746	0.1906	0.003336	0.05801	0.493	0.7844	3001	5000		beta.i[7584]	0.002263	0.03174	0.0004833	-0.06037	0.002531	0.06549	3001	5000
Zv9_00053657 Zv9_00053656 Zv9_00053660 Zv9_00053662 Zv9_00053658 Zv9_00053655 Zv9_00053654 Zv9_00053659	8.4129	20.9087	19.5131	10.8343	4.62146	1.39172	1.45193	8.2627		pi.1[7473]	0.5647	0.2209	0.004047	0.05814	0.5998	0.8871	3001	5000		beta.i[7473]	0.002544	0.03141	0.0004578	-0.05851	0.002374	0.06291	3001	5000
Zv9_00043734 Zv9_00043736 Zv9_00043735	17.0221	13.4078	12.7019	6.94826	1.38858	3.06872	5.5418	22.4466		pi.1[6042]	0.5123	0.2037	0.003724	0.05832	0.538	0.8301	3001	5000		beta.i[6042]	0.002456	0.03153	0.0004338	-0.06038	0.002746	0.06454	3001	5000
Zv9_00053073 Zv9_00053072	49.0559	32.3355	7.32611	3.39567	2.1508	6.13028	9.98913	19.0922		pi.1[7388]	0.4644	0.1797	0.002833	0.05856	0.4836	0.7598	3001	5000		beta.i[7388]	0.002395	0.03162	0.0004404	-0.06046	0.002475	0.06366	3001	5000
Zv9_00012437	11.6367	25.5826	21.2852	11.5135	1.63668	1.24893	1.25041	1.59523		pi.1[1763]	0.5224	0.2083	0.003441	0.05878	0.5492	0.8507	3001	5000		beta.i[1763]	0.001662	0.03143	0.0005069	-0.06043	0.001537	0.06331	3001	5000
Zv9_00055203	1	1	1	1.03946	1.14388	15.4863	22.8535	23.9324		pi.1[7659]	0.6946	0.2543	0.006727	0.059	0.7548	0.9912	3001	5000		beta.i[7659]	0.0009386	0.03131	0.00039	-0.05943	0.0002845	0.0639	3001	5000
Zv9_00000846 Zv9_00000845 Zv9_00000847 Zv9_00000844	1	1	21.4004	5.48227	9.24669	8.05619	8.96651	7.97418		pi.1[124]	0.6759	0.2559	0.006014	0.05918	0.7296	0.9894	3001	5000		beta.i[124]	0.000753	0.03173	0.0004075	-0.06089	0.0005905	0.06329	3001	5000
Zv9_00029218	1.54581	1.23305	18.1433	30.4996	9.91636	3.38802	2.25434	1.45223		pi.1[4033]	0.6598	0.2552	0.005116	0.05923	0.713	0.9884	3001	5000		beta.i[4033]	0.0005976	0.03159	0.0005498	-0.05957	0.0001048	0.06265	3001	5000
Zv9_00038090 Zv9_00038091	1.00122	1.00441	1.00845	1.02462	3.62871	16.1375	17.3881	13.4553		pi.1[5301]	0.6886	0.254	0.00551	0.05933	0.7487	0.9907	3001	5000		beta.i[5301]	0.001007	0.03157	0.0005174	-0.06047	0.001002	0.06185	3001	5000
Zv9_00031493 Zv9_00031490 Zv9_00031491 Zv9_00031494 Zv9_00031492	2.96237	3.88638	3.40461	2.6329	4.76775	11.7195	13.9471	7.58524		pi.1[4373]	0.6736	0.2518	0.00577	0.05938	0.7347	0.9844	3001	5000		beta.i[4373]	0.001987	0.03179	0.0005212	-0.06082	0.001953	0.06393	3001	5000
Zv9_00050852	23.767	14.5884	19.0104	12.3615	3.80039	5.00692	3.90814	2.02347		pi.1[7100]	0.4947	0.1964	0.002968	0.05942	0.5178	0.809	3001	5000		beta.i[7100]	0.003235	0.03153	0.0005082	-0.05656	0.003092	0.0655	3001	5000
Zv9_00044097	1	1	1	1	1	4.53395	18.5426	82.0726		pi.1[6107]	0.7232	0.2518	0.005688	0.05945	0.7978	0.9935	3001	5000		beta.i[6107]	-3.435e-05	0.03157	0.0004984	-0.06108	-0.0007799	0.0637	3001	5000
Zv9_00022861	1.65785	1.60591	1.30848	1.11289	7.83098	19.0426	16.7899	7.5672		pi.1[3176]	0.6867	0.2564	0.006456	0.05959	0.7479	0.9919	3001	5000		beta.i[3176]	0.001225	0.03124	0.0004537	-0.06054	0.001545	0.06167	3001	5000
Zv9_00055777 Zv9_00055778	1.0694	1.10913	1.63408	1.95132	4.00637	27.5226	21.9879	5.09476		pi.1[7737]	0.6749	0.2577	0.00546	0.05959	0.7294	0.9914	3001	5000		beta.i[7737]	-0.000715	0.03166	0.000447	-0.06377	-0.0001264	0.06134	3001	5000
Zv9_00014689	3.04928	5.33771	7.23176	5.00813	1.34461	7.04472	8.66091	22.3958		pi.1[2027]	0.6719	0.253	0.004768	0.05977	0.7306	0.9848	3001	5000		beta.i[2027]	0.0006705	0.03125	0.0005266	-0.05923	0.0005527	0.06297	3001	5000
Zv9_00019456	39.5391	23.2342	18.2802	5.73269	6.11019	3.86031	3.87763	2.94367		pi.1[2705]	0.4691	0.1824	0.002978	0.05996	0.4922	0.7646	3001	5000		beta.i[2705]	0.0028	0.03117	0.0004828	-0.05842	0.002297	0.0649	3001	5000
Zv9_00055330 Zv9_00055329	29.1854	16.3178	12.7387	8.60717	6.10623	4.48295	4.27463	6.46485		pi.1[7674]	0.4957	0.188	0.003554	0.06018	0.5163	0.7934	3001	5000		beta.i[7674]	0.00173	0.03115	0.0004251	-0.06006	0.001339	0.06479	3001	5000
Zv9_00001774 Zv9_00001775	29.4586	16.4689	10.4288	6.62381	1.58832	4.9447	9.2605	15.8428		pi.1[249]	0.4872	0.1915	0.002901	0.06028	0.5088	0.7926	3001	5000		beta.i[249]	0.002762	0.03129	0.0005117	-0.05757	0.002662	0.06527	3001	5000
Zv9_00035077	1	1	1	1.29505	1.72214	15.0217	17.1684	24.4684		pi.1[4871]	0.6974	0.2584	0.006058	0.06028	0.7629	0.9899	3001	5000		beta.i[4871]	0.0006049	0.03155	0.0004658	-0.06125	0.0003386	0.06426	3001	5000
Zv9_00000742 Zv9_00000741 Zv9_00000739 Zv9_00000740	1.35679	2.40699	1.8131	1.28086	7.23433	14.3083	13.4342	12.5687		pi.1[111]	0.6879	0.2517	0.005115	0.06031	0.7467	0.9881	3001	5000		beta.i[111]	0.0005523	0.03147	0.0004201	-0.06069	0.0007806	0.06131	3001	5000
Zv9_00040961	1.84221	1	28.1914	34.6033	16.9509	1.19454	1.08939	1.04245		pi.1[5679]	0.635	0.2521	0.004374	0.0605	0.6742	0.9805	3001	5000		beta.i[5679]	0.001198	0.03194	0.0005005	-0.06081	0.001207	0.06228	3001	5000
Zv9_00052611 Zv9_00052612 Zv9_00052613	1.60132	1.37756	1.94252	10.9015	14.9176	9.30479	7.12713	4.47059		pi.1[7331]	0.6885	0.251	0.005514	0.06052	0.7488	0.9871	3001	5000		beta.i[7331]	0.0001757	0.03136	0.0004863	-0.06199	-0.0001517	0.06172	3001	5000
Zv9_00015293 Zv9_00015294	37.0734	24.7405	6.80843	5.73174	6.19795	4.65309	5.77325	6.54658		pi.1[2116]	0.4698	0.1867	0.002668	0.06067	0.489	0.7752	3001	5000		beta.i[2116]	0.002882	0.03191	0.0005228	-0.05871	0.002599	0.06623	3001	5000
Zv9_00015280 Zv9_00015281	104.849	23.3896	7.02982	7.56298	9.00662	6.87148	5.68615	5.01949		pi.1[2112]	0.4181	0.1649	0.002714	0.06075	0.4305	0.7015	3001	5000		beta.i[2112]	0.002816	0.03175	0.0005148	-0.05706	0.002341	0.06514	3001	5000
Zv9_00041240 Zv9_00041238 Zv9_00041239	1.00624	1	1.16843	5.09877	24.0786	12.9629	5.881	5.3424		pi.1[5720]	0.6836	0.2559	0.006538	0.0609	0.7397	0.9932	3001	5000		beta.i[5720]	0.0002869	0.03236	0.0004878	-0.06288	0.0004868	0.06386	3001	5000
Zv9_00049152	293.635	61.0016	14.6003	7.40667	1.50844	5.02942	4.27494	11.0585		pi.1[6863]	0.3842	0.1522	0.002174	0.06095	0.3948	0.6471	3001	5000		beta.i[6863]	0.003953	0.03154	0.000643	-0.05684	0.00419	0.06525	3001	5000
Zv9_00057560	8.13374	5.93435	6.1082	5.22509	1.91795	7.40287	8.88925	30.7858		pi.1[8000]	0.5892	0.2209	0.004397	0.06106	0.6253	0.9054	3001	5000		beta.i[8000]	0.001851	0.0318	0.0005174	-0.05914	0.001331	0.06523	3001	5000
Zv9_00013626 Zv9_00013627	1	1	1	1.08602	2.1642	23.7289	19.307	15.1827		pi.1[1900]	0.6839	0.2559	0.006045	0.0611	0.7455	0.99	3001	5000		beta.i[1900]	-0.0002883	0.03184	0.0004863	-0.06289	0.0002511	0.06067	3001	5000
Zv9_00009879	585.23	93.8232	20.0154	7.89906	1.51365	1.12124	1.10082	1.24154		pi.1[1425]	0.3546	0.1401	0.002167	0.06115	0.3625	0.6081	3001	5000		beta.i[1425]	0.002096	0.0314	0.0007024	-0.05999	0.001941	0.06374	3001	5000
Zv9_00003097 Zv9_00003094 Zv9_00003093 Zv9_00003095 Zv9_00003096 Zv9_00003092	1.04144	1.02138	1.03649	1.04412	5.47661	16.8503	14.4561	11.7544		pi.1[443]	0.6959	0.2575	0.005509	0.0615	0.7606	0.9913	3001	5000		beta.i[443]	0.0006462	0.03164	0.0004768	-0.0615	0.001287	0.06216	3001	5000
Zv9_00041436	1.03357	1.01614	1.0155	1.02749	1.17459	16.0754	20.8869	24.6932		pi.1[5742]	0.6893	0.2547	0.005148	0.06186	0.7504	0.9904	3001	5000		beta.i[5742]	0.0005622	0.0314	0.0004818	-0.06039	0.0005045	0.06261	3001	5000
Zv9_00004508 Zv9_00004510 Zv9_00004509	72.2661	35.4873	26.5896	17.1613	1	1	1	1		pi.1[652]	0.4277	0.172	0.002881	0.06188	0.4411	0.7216	3001	5000		beta.i[652]	0.002697	0.03129	0.0005364	-0.059	0.002577	0.06392	3001	5000
Zv9_00010639	1	1	1	1	1.07716	12.2574	25.5409	31.7551		pi.1[1532]	0.708	0.2512	0.005951	0.06205	0.7725	0.9922	3001	5000		beta.i[1532]	0.0001175	0.03171	0.0003951	-0.06338	0.000115	0.06186	3001	5000
Zv9_00032515 Zv9_00032514	1.56465	2.31211	1.76083	1.33418	21.0717	10.6173	15.1347	8.11444		pi.1[4511]	0.6797	0.2559	0.006474	0.06239	0.7345	0.9927	3001	5000		beta.i[4511]	0.000127	0.03138	0.0004339	-0.06054	-7.457e-05	0.06113	3001	5000
Zv9_00009114	1.30928	1.60877	7.44302	16.1127	6.31766	5.85083	7.16701	6.89317		pi.1[1312]	0.7076	0.2507	0.006147	0.06245	0.7724	0.9937	3001	5000		beta.i[1312]	0.0008166	0.03196	0.0004446	-0.0613	0.0003522	0.06439	3001	5000
Zv9_00036295 Zv9_00036298 Zv9_00036296 Zv9_00036294 Zv9_00036297 Zv9_00036299	30.612	20.1242	17.2074	15.7383	6.86418	2.31787	1.9773	1.75425		pi.1[5035]	0.4834	0.1898	0.002719	0.06307	0.5054	0.7883	3001	5000		beta.i[5035]	0.002736	0.03181	0.0004198	-0.05949	0.002232	0.0641	3001	5000
Zv9_00047867	1.12334	1.1756	2.15127	1.81025	10.0447	15.6809	18.314	4.71091		pi.1[6676]	0.6816	0.2579	0.005124	0.06337	0.7395	0.9921	3001	5000		beta.i[6676]	-2.379e-06	0.03193	0.0004576	-0.06351	0.0001432	0.06261	3001	5000
Zv9_00052521 Zv9_00052520 Zv9_00052518 Zv9_00052519	22.0107	15.1524	16.4138	17.9532	16.0367	1	1	1		pi.1[7317]	0.4913	0.1958	0.003364	0.06346	0.5143	0.8051	3001	5000		beta.i[7317]	0.002072	0.03127	0.000428	-0.05898	0.001598	0.06395	3001	5000
Zv9_00057062 Zv9_00057061	1.07464	1.00406	3.17348	4.88776	7.14639	6.62531	10.2943	16.1149		pi.1[7899]	0.7159	0.2527	0.005883	0.0638	0.7821	0.9943	3001	5000		beta.i[7899]	0.000151	0.03113	0.0004587	-0.06188	0.0002754	0.0612	3001	5000
Zv9_00028372 Zv9_00028373	1.09292	1.07917	1.21427	1.70475	3.3018	3.56017	7.50478	252.033		pi.1[3924]	0.7317	0.2532	0.005611	0.06396	0.8123	0.9925	3001	5000		beta.i[3924]	0.0002782	0.03147	0.0006176	-0.06081	0.0004578	0.0605	3001	5000
Zv9_00006461	53.2576	9.93187	3.25499	2.51489	7.86644	14.3478	13.3396	15.7368		pi.1[904]	0.4512	0.1759	0.002817	0.06397	0.4707	0.7436	3001	5000		beta.i[904]	0.003227	0.03139	0.000485	-0.05884	0.003054	0.06507	3001	5000
Zv9_00050795 Zv9_00050793 Zv9_00050791 Zv9_00050790 Zv9_00050792 Zv9_00050794	49.9168	29.3085	6.16075	4.10122	7.51229	7.78284	6.76839	8.46144		pi.1[7085]	0.4598	0.1785	0.002659	0.06423	0.4773	0.7602	3001	5000		beta.i[7085]	0.003314	0.03147	0.0004431	-0.05812	0.002714	0.06384	3001	5000
Zv9_00043432	1.49754	1	16.6577	25.5723	62.5021	1.63063	1.16926	1.07588		pi.1[6008]	0.6373	0.2521	0.005091	0.06425	0.6788	0.9849	3001	5000		beta.i[6008]	0.0003165	0.032	0.0004954	-0.06124	0.0004595	0.06438	3001	5000
Zv9_00003512 Zv9_00003511	1.20986	1.45054	1.4241	1.45054	1.24701	11.9484	13.9506	44.8291		pi.1[504]	0.7066	0.2514	0.004689	0.06429	0.7735	0.9923	3001	5000		beta.i[504]	0.0002115	0.03149	0.0004985	-0.06248	1.368e-05	0.06103	3001	5000
Zv9_00057021 Zv9_00057020	45.7001	11.6924	3.86437	2.63774	2.25298	6.88631	14.9943	76.9606		pi.1[7892]	0.4716	0.1824	0.003337	0.06431	0.4909	0.7658	3001	5000		beta.i[7892]	0.002883	0.03166	0.0005197	-0.05767	0.003064	0.06613	3001	5000
Zv9_00040711 Zv9_00040707 Zv9_00040708 Zv9_00040703 Zv9_00040712 Zv9_00040706 Zv9_00040713 Zv9_00040704 Zv9_00040710 Zv9_00040709 Zv9_00040705	5.99682	2.85299	5.08096	5.89923	2.50781	8.56742	14.0774	18.8611		pi.1[5647]	0.6195	0.232	0.004211	0.06436	0.6634	0.9369	3001	5000		beta.i[5647]	0.001231	0.03181	0.000439	-0.06224	0.001931	0.06348	3001	5000
Zv9_00031762	66.4064	40.2433	9.91849	5.60142	8.85121	3.92517	3.43058	2.73019		pi.1[4416]	0.4388	0.172	0.002638	0.06473	0.4583	0.7263	3001	5000		beta.i[4416]	0.002093	0.03162	0.0004047	-0.05773	0.0019	0.06622	3001	5000
Zv9_00000213 Zv9_00000214 Zv9_00000215	2.46351	2.45613	6.78351	3.10861	3.15262	10.3891	16.9223	8.21715		pi.1[34]	0.6801	0.2492	0.005399	0.06486	0.7364	0.9878	3001	5000		beta.i[34]	0.0009402	0.03152	0.0005446	-0.06159	0.001114	0.06327	3001	5000
Zv9_00000349 Zv9_00000350	1.00418	1.00565	1.07489	1.70243	26.445	13.2428	11.2765	9.41107		pi.1[59]	0.6823	0.2507	0.005619	0.065	0.7378	0.9886	3001	5000		beta.i[59]	0.001456	0.03171	0.000477	-0.06099	0.0009243	0.0646	3001	5000
Zv9_00008961	1	1	15.4761	66.5468	36.8015	1	1	1		pi.1[1277]	0.6399	0.2469	0.004603	0.065	0.6783	0.9838	3001	5000		beta.i[1277]	0.0007804	0.03175	0.0004893	-0.06055	0.001001	0.06239	3001	5000
Zv9_00041685 Zv9_00041683 Zv9_00041684 Zv9_00041682	1	37.5781	38.8351	4.9536	1	16.5046	11.8698	1		pi.1[5778]	0.6045	0.2499	0.004361	0.0651	0.635	0.9758	3001	5000		beta.i[5778]	0.001269	0.03196	0.0004652	-0.06008	0.001154	0.0646	3001	5000
Zv9_00011590 Zv9_00011589	12.1768	34.5646	28.0144	9.26651	1.19358	1	1	1		pi.1[1666]	0.5263	0.205	0.003342	0.06546	0.5496	0.8528	3001	5000		beta.i[1666]	0.001327	0.03097	0.0004973	-0.05988	0.001198	0.06251	3001	5000
Zv9_00028281	60.6769	45.5595	27.0761	7.33076	1.26983	1.02441	1.03929	1.075		pi.1[3907]	0.4381	0.175	0.003059	0.06577	0.4546	0.7357	3001	5000		beta.i[3907]	0.001992	0.03172	0.000524	-0.05881	0.001419	0.06415	3001	5000
Zv9_00010668	28.2522	5.63755	6.29906	5.83372	21.5513	12.3776	8.91392	3.49429		pi.1[1536]	0.4854	0.1862	0.002957	0.06583	0.5034	0.7873	3001	5000		beta.i[1536]	0.001798	0.03235	0.0004593	-0.06342	0.002348	0.06531	3001	5000
Zv9_00049361 Zv9_00049362 Zv9_00049363 Zv9_00049360	45.6314	30.8258	5.32579	5.64263	5.02479	10.3758	8.99532	4.26504		pi.1[6891]	0.4603	0.1803	0.003173	0.06591	0.4751	0.7606	3001	5000		beta.i[6891]	0.002325	0.03148	0.0005256	-0.05793	0.001764	0.06441	3001	5000
Zv9_00020633	27.8331	20.3792	16.5961	5.27967	10.1549	3.85327	3.03221	3.62633		pi.1[2882]	0.488	0.1905	0.002889	0.06593	0.5087	0.7893	3001	5000		beta.i[2882]	0.002338	0.03156	0.0004686	-0.05926	0.001873	0.06366	3001	5000
Zv9_00026952 Zv9_00026956 Zv9_00026957 Zv9_00026954 Zv9_00026953 Zv9_00026955	1.71202	2.44201	4.09371	5.03845	1.6758	6.3512	14.1716	39.6281		pi.1[3727]	0.7288	0.2452	0.005514	0.06605	0.7979	0.9908	3001	5000		beta.i[3727]	0.0006571	0.03186	0.0004964	-0.06112	0.0008607	0.06334	3001	5000
Zv9_00011807	2.29726	2.1693	1.81633	3.21658	10.6841	13.1629	10.1485	7.2546		pi.1[1691]	0.6903	0.251	0.006243	0.06609	0.7526	0.9886	3001	5000		beta.i[1691]	0.00123	0.03134	0.0004764	-0.06016	0.001566	0.06125	3001	5000
Zv9_00042841	1	1	1.27316	1.23863	1.23068	13.0292	23.2578	23.8725		pi.1[5922]	0.6916	0.2547	0.006156	0.06674	0.749	0.9919	3001	5000		beta.i[5922]	0.0008965	0.03142	0.0004551	-0.06093	0.0006743	0.06425	3001	5000
Zv9_00013080 Zv9_00013078 Zv9_00013079 Zv9_00013077	3.22409	2.07016	2.75844	2.37271	4.51603	9.03287	16.2233	14.0042		pi.1[1833]	0.6822	0.2477	0.005398	0.06678	0.7441	0.9851	3001	5000		beta.i[1833]	0.001337	0.03181	0.0004164	-0.05994	0.001198	0.06401	3001	5000
Zv9_00039548	75.1729	38.4905	5.48457	3.98205	9.56487	6.72382	6.61907	8.89666		pi.1[5493]	0.447	0.1661	0.002292	0.06679	0.4659	0.7251	3001	5000		beta.i[5493]	0.003673	0.03131	0.0004298	-0.05708	0.003654	0.06604	3001	5000
Zv9_00005057	1.27168	1.00965	7.72885	55.0713	49.2085	1.22124	1.05298	1.085		pi.1[727]	0.6385	0.2506	0.005022	0.06686	0.6755	0.9842	3001	5000		beta.i[727]	0.001153	0.03192	0.0005194	-0.06103	0.0006741	0.06437	3001	5000
Zv9_00026828 Zv9_00026829 Zv9_00026830	6.12997	2.90425	2.59235	20.5533	15.6043	7.3603	6.21805	4.81434		pi.1[3701]	0.6028	0.2276	0.003785	0.06687	0.6417	0.9324	3001	5000		beta.i[3701]	0.002168	0.03119	0.0004601	-0.05755	0.002187	0.0635	3001	5000
Zv9_00004607 Zv9_00004591	337.389	126.31	33.6058	1	1	1	1	1		pi.1[665]	0.3689	0.1423	0.001857	0.06699	0.3778	0.623	3001	5000		beta.i[665]	0.002508	0.03151	0.0005744	-0.05947	0.002256	0.06369	3001	5000
Zv9_00021373 Zv9_00021375 Zv9_00021374	42.0819	20.8355	5.36448	3.95314	8.3548	8.06246	7.97739	10.5686		pi.1[2979]	0.4715	0.1796	0.002812	0.06711	0.4922	0.76	3001	5000		beta.i[2979]	0.003078	0.03155	0.0004303	-0.05658	0.003111	0.0649	3001	5000
Zv9_00058707	1	1	1.07277	3.01418	4.61108	7.15833	12.873	29.9688		pi.1[8172]	0.7148	0.2532	0.006012	0.06734	0.787	0.9913	3001	5000		beta.i[8172]	5.88e-05	0.03112	0.000484	-0.06039	-0.0004002	0.06137	3001	5000
Zv9_00046776 Zv9_00046777 Zv9_00046775	1	6.47351	5.82777	2.71376	4.07931	1	23.7121	58.6756		pi.1[6526]	0.7119	0.2569	0.006056	0.06738	0.7847	0.9921	3001	5000		beta.i[6526]	0.0004538	0.03157	0.000528	-0.06062	0.000445	0.06274	3001	5000
Zv9_00053865 Zv9_00053866 Zv9_00053867	3.11906	7.45579	8.50033	6.53836	5.98399	1	15.4678	17.2873		pi.1[7502]	0.6602	0.244	0.004678	0.06747	0.7123	0.979	3001	5000		beta.i[7502]	0.001999	0.03144	0.0004401	-0.05928	0.00227	0.06338	3001	5000
Zv9_00020565	1	1	1	1.02967	1.96642	7.77192	16.1959	35.6522		pi.1[2873]	0.7053	0.2553	0.006112	0.06765	0.7734	0.9934	3001	5000		beta.i[2873]	0.0009065	0.03152	0.0004815	-0.06131	0.001336	0.06367	3001	5000
Zv9_00028090	1	1	1.0323	1.38268	1.15917	17.105	24.4452	15.5187		pi.1[3872]	0.6771	0.2587	0.006268	0.06774	0.7313	0.9884	3001	5000		beta.i[3872]	0.0001507	0.03198	0.0005169	-0.06374	0.0003894	0.06226	3001	5000
Zv9_00019409	1.61044	1.01316	11.3471	41.3648	10.3751	4.56595	3.48475	2.39327		pi.1[2697]	0.6695	0.2497	0.005152	0.0678	0.7201	0.9852	3001	5000		beta.i[2697]	0.0006387	0.03174	0.0005094	-0.06119	0.0007626	0.06291	3001	5000
Zv9_00001632 Zv9_00001633	16.1731	23.7366	10.0797	5.88811	4.22628	5.17614	4.7961	4.01981		pi.1[225]	0.5204	0.2007	0.003229	0.06785	0.5428	0.8319	3001	5000		beta.i[225]	0.002303	0.03133	0.0004468	-0.05801	0.00214	0.06395	3001	5000
Zv9_00014891	1.049	1	2.56405	4.13196	1	28.9341	23.2423	14.475		pi.1[2062]	0.6747	0.2569	0.005726	0.06794	0.7345	0.9906	3001	5000		beta.i[2062]	0.0007765	0.03174	0.0004263	-0.06192	0.0004071	0.06274	3001	5000
Zv9_00011255	79.3124	21.5934	14.2167	7.35606	1.71545	9.70407	8.4169	8.00507		pi.1[1615]	0.4374	0.168	0.002502	0.06801	0.4499	0.7179	3001	5000		beta.i[1615]	0.003508	0.03186	0.0004933	-0.05726	0.002757	0.06668	3001	5000
Zv9_00006077 Zv9_00006079 Zv9_00006078	36.0679	44.1291	5.6163	1.85504	1.23582	8.97738	9.97539	25.4461		pi.1[853]	0.4751	0.1834	0.002768	0.06821	0.4942	0.7704	3001	5000		beta.i[853]	0.002489	0.03109	0.0004752	-0.05998	0.002569	0.06372	3001	5000
Zv9_00041246	41.796	14.7779	9.06241	5.57669	12.9179	7.59128	6.14505	6.26924		pi.1[5722]	0.4764	0.1814	0.002744	0.06842	0.4937	0.7729	3001	5000		beta.i[5722]	0.0031	0.03133	0.0005097	-0.05837	0.003482	0.0633	3001	5000
Zv9_00033059	1	1	1.0025	1.00439	2.62672	13.1185	15.5153	24.3189		pi.1[4583]	0.7	0.2566	0.005495	0.06843	0.7658	0.9931	3001	5000		beta.i[4583]	0.0005264	0.03146	0.0004912	-0.06237	0.001061	0.06225	3001	5000
Zv9_00012765 Zv9_00012764	122.555	53.8812	7.23778	2.35887	1.64355	8.56487	9.8888	8.75995		pi.1[1803]	0.4074	0.1634	0.002453	0.06855	0.42	0.6881	3001	5000		beta.i[1803]	0.00407	0.03113	0.0005905	-0.05684	0.003934	0.06624	3001	5000
Zv9_00019143 Zv9_00019142	86.9888	30.3132	21.9406	14.6394	2.4195	2.97949	2.85952	2.85143		pi.1[2657]	0.4315	0.1667	0.002603	0.06859	0.4441	0.7101	3001	5000		beta.i[2657]	0.002762	0.03155	0.0005888	-0.05804	0.002367	0.06445	3001	5000
Zv9_00009523 Zv9_00009522 Zv9_00009521	1.07706	1.11675	1.67591	1	41.1613	10.1598	12.5257	12.8626		pi.1[1365]	0.6562	0.2568	0.005731	0.0688	0.706	0.9874	3001	5000		beta.i[1365]	0.001429	0.03189	0.0005339	-0.06138	0.00144	0.06471	3001	5000
Zv9_00009240	2.50302	1.73883	2.23604	2.65018	5.90686	12.0399	12.8014	13.1877		pi.1[1324]	0.6939	0.2554	0.005794	0.06897	0.7576	0.9863	3001	5000		beta.i[1324]	0.00129	0.03166	0.0005088	-0.06094	0.001567	0.06438	3001	5000
Zv9_00039927	1.29273	1.03405	4.11463	28.974	8.35072	8.3754	7.62129	2.39709		pi.1[5536]	0.6695	0.2538	0.0049	0.06898	0.7184	0.9894	3001	5000		beta.i[5536]	0.0004403	0.03221	0.0004782	-0.06302	0.0003743	0.06412	3001	5000
Zv9_00049851 Zv9_00049852 Zv9_00049849	33.9964	39.1291	12.074	6.08729	2.38263	3.91388	5.01535	9.13426		pi.1[6947]	0.4825	0.184	0.002967	0.06945	0.5011	0.7801	3001	5000		beta.i[6947]	0.002935	0.03148	0.0004999	-0.05906	0.002959	0.0644	3001	5000
Zv9_00008828 Zv9_00008827	2.14514	1.00106	37.1046	49.6519	19.8452	1.1947	1.11146	1.04603		pi.1[1234]	0.6472	0.2456	0.004569	0.06973	0.6914	0.9836	3001	5000		beta.i[1234]	0.0006588	0.03204	0.0005715	-0.0617	0.0004126	0.06418	3001	5000
Zv9_00007670 Zv9_00007669 Zv9_00007671	2.13655	1.60257	1.62428	2.03841	4.28368	11.7797	14.7223	14.4374		pi.1[1075]	0.7036	0.2493	0.00636	0.06987	0.773	0.9898	3001	5000		beta.i[1075]	0.000626	0.03152	0.0004656	-0.06063	0.0005329	0.06134	3001	5000
Zv9_00046002 Zv9_00046001 Zv9_00046003	25.1409	16.4714	24.0657	14.9531	3.58431	2.86321	2.94238	2.92687		pi.1[6415]	0.5002	0.1909	0.003128	0.06995	0.5219	0.8104	3001	5000		beta.i[6415]	0.002368	0.03118	0.0004151	-0.05728	0.00211	0.0658	3001	5000
Zv9_00037566	1.12321	1.3758	1.24983	1.51224	19.0383	17.3926	11.2459	5.79247		pi.1[5223]	0.6863	0.254	0.005938	0.07003	0.7482	0.9899	3001	5000		beta.i[5223]	-0.0001022	0.03154	0.0004635	-0.06295	-0.0001888	0.06112	3001	5000
Zv9_00003999	5.0979	22.8042	28.186	13.702	1.71935	1.1807	1.10158	1.44385		pi.1[566]	0.5908	0.2284	0.003889	0.0701	0.6202	0.928	3001	5000		beta.i[566]	0.001862	0.03204	0.0004326	-0.0622	0.001965	0.06541	3001	5000
Zv9_00039234	11.0506	22.2385	24.2293	96.6399	1	1	3.11728	1		pi.1[5450]	0.5153	0.2022	0.003729	0.07014	0.5363	0.8391	3001	5000		beta.i[5450]	0.002694	0.0319	0.0005104	-0.05972	0.002133	0.06554	3001	5000
Zv9_00021325 Zv9_00021324	3.3731	3.03857	2.17881	3.27535	6.72056	11.9045	11.5065	13.2018		pi.1[2972]	0.6839	0.2413	0.005285	0.07031	0.736	0.9798	3001	5000		beta.i[2972]	0.00121	0.0315	0.0004411	-0.06106	0.00143	0.06346	3001	5000
Zv9_00018441 Zv9_00018439 Zv9_00018440	2.5806	2.99896	3.61198	2.25947	3.28629	17.6612	17.2932	12.4011		pi.1[2570]	0.6995	0.2466	0.006151	0.07045	0.762	0.9903	3001	5000		beta.i[2570]	0.00118	0.03171	0.0004487	-0.05994	0.001452	0.06288	3001	5000
Zv9_00046942 Zv9_00046941 Zv9_00046940	6.14416	13.0401	7.13885	7.74882	3.20492	3.85338	4.15124	30.9654		pi.1[6544]	0.6149	0.2305	0.004113	0.0707	0.6591	0.9332	3001	5000		beta.i[6544]	0.001567	0.03145	0.000474	-0.05882	0.001567	0.06385	3001	5000
Zv9_00028129	85.8006	16.2936	5.30329	31.0204	6.96733	4.58397	5.86808	16.4816		pi.1[3877]	0.4351	0.1667	0.002266	0.07073	0.4505	0.719	3001	5000		beta.i[3877]	0.003556	0.03225	0.0005207	-0.0596	0.00391	0.06529	3001	5000
Zv9_00031081 Zv9_00031078 Zv9_00031076 Zv9_00031079 Zv9_00031080 Zv9_00031077 Zv9_00031075	70.603	22.6226	10.9328	5.22241	8.73707	5.09079	4.6684	4.81338		pi.1[4292]	0.4354	0.1711	0.002576	0.07084	0.4511	0.7243	3001	5000		beta.i[4292]	0.002981	0.03166	0.0004959	-0.05868	0.002558	0.06511	3001	5000
Zv9_00035714 Zv9_00035718 Zv9_00035711 Zv9_00035717 Zv9_00035715 Zv9_00035716 Zv9_00035719 Zv9_00035720 Zv9_00035712 Zv9_00035713	1.17519	1.35149	2.32886	4.80472	15.4495	10.487	6.98609	5.27476		pi.1[4955]	0.6905	0.2573	0.005683	0.07087	0.7486	0.9918	3001	5000		beta.i[4955]	-1.938e-05	0.03182	0.0004754	-0.06353	1.101e-05	0.0609	3001	5000
Zv9_00055925 Zv9_00055926 Zv9_00055927	23.2756	29.1652	9.66329	3.55098	4.7678	5.51765	4.97293	14.7558		pi.1[7751]	0.5121	0.1919	0.003057	0.07109	0.5386	0.8083	3001	5000		beta.i[7751]	0.002623	0.03143	0.0004072	-0.06009	0.002531	0.06365	3001	5000
Zv9_00036679 Zv9_00036678	7.24717	1.37504	1.35085	4.231	12.3602	19.2338	17.4193	8.1984		pi.1[5089]	0.5917	0.2237	0.003767	0.07116	0.6259	0.9114	3001	5000		beta.i[5089]	0.001525	0.03108	0.0005042	-0.05914	0.001575	0.06197	3001	5000
Zv9_00037675 Zv9_00037674	55.2385	12.6259	20.9693	37.1307	7.00317	1.51273	1.17851	1		pi.1[5242]	0.4477	0.1712	0.002385	0.07116	0.4623	0.7389	3001	5000		beta.i[5242]	0.00201	0.03168	0.0004358	-0.0595	0.00207	0.06597	3001	5000
Zv9_00013192 Zv9_00013193 Zv9_00013191 Zv9_00013194	1.26496	1.07466	1.09999	1.12566	1.21006	6.51163	48.3838	25.1263		pi.1[1846]	0.6871	0.2542	0.006454	0.07125	0.75	0.9894	3001	5000		beta.i[1846]	-0.0002764	0.03207	0.0003968	-0.0632	-0.0003156	0.06399	3001	5000
Zv9_00050029 Zv9_00050030	224.369	20.034	8.72018	11.994	16.8904	8.51888	6.66194	2.03281		pi.1[6971]	0.3968	0.151	0.002389	0.07145	0.4116	0.657	3001	5000		beta.i[6971]	0.003146	0.03238	0.0005533	-0.0606	0.003367	0.06866	3001	5000
Zv9_00030772	1	1	1.03448	1.34715	9.19044	8.9484	12.8583	17.6597		pi.1[4252]	0.6961	0.2579	0.005069	0.07154	0.7671	0.9902	3001	5000		beta.i[4252]	0.0004155	0.03153	0.0004716	-0.06213	0.0001675	0.06213	3001	5000
Zv9_00034831 Zv9_00034830	2.1731	1	1.78607	6.42705	6.29783	9.93797	12.5687	7.67974		pi.1[4839]	0.6817	0.2515	0.005476	0.07157	0.7394	0.9867	3001	5000		beta.i[4839]	0.001255	0.03165	0.0005227	-0.06215	0.001066	0.06281	3001	5000
Zv9_00047216	13.4285	14.9381	16.6309	15.887	21.0447	1	1	1		pi.1[6584]	0.5311	0.2	0.00338	0.0717	0.5559	0.8427	3001	5000		beta.i[6584]	0.002009	0.03134	0.0004704	-0.05905	0.002267	0.06278	3001	5000
Zv9_00005085	8.66432	17.5303	16.4522	8.31813	3.15259	5.38936	4.27668	1.92264		pi.1[732]	0.5622	0.2156	0.003822	0.07179	0.5923	0.8867	3001	5000		beta.i[732]	0.002275	0.03128	0.0004974	-0.05911	0.002992	0.06281	3001	5000
Zv9_00042575	24.1365	23.5636	12.2243	4.385	4.71506	6.26292	5.6198	3.59918		pi.1[5890]	0.4945	0.1912	0.003228	0.0718	0.5141	0.8012	3001	5000		beta.i[5890]	0.002878	0.03127	0.0005684	-0.05839	0.002288	0.06352	3001	5000
Zv9_00048012 Zv9_00048009 Zv9_00048011 Zv9_00048008 Zv9_00048010	1.69563	2.17484	3.12723	2.83312	1.41012	16.4339	14.8475	20.5455		pi.1[6695]	0.699	0.2526	0.005353	0.07187	0.7607	0.9908	3001	5000		beta.i[6695]	0.001177	0.03125	0.0004777	-0.06191	0.0009288	0.06202	3001	5000
Zv9_00011717 Zv9_00011719 Zv9_00011718	176.824	8.36062	5.60625	12.3922	12.437	13.6529	12.3092	11.0527		pi.1[1681]	0.4052	0.1551	0.002168	0.07206	0.4158	0.6752	3001	5000		beta.i[1681]	0.003269	0.03182	0.0005287	-0.06018	0.003447	0.06617	3001	5000
Zv9_00053652 Zv9_00053653	1.03423	1.00331	1.06872	1.27524	24.1144	14.4738	11.3871	11.2179		pi.1[7472]	0.6764	0.2503	0.005686	0.07206	0.7294	0.989	3001	5000		beta.i[7472]	0.00124	0.03156	0.0004378	-0.06012	0.001561	0.06384	3001	5000
Zv9_00052747	6.18995	10.3003	16.9308	14.7425	2.65964	4.14086	3.60725	3.62521		pi.1[7349]	0.5958	0.2259	0.004317	0.0723	0.6299	0.921	3001	5000		beta.i[7349]	0.001585	0.03136	0.0005137	-0.05991	0.001287	0.06418	3001	5000
Zv9_00045857	1.0576	1.26947	1.54489	1.2008	1.20427	8.64158	18.0837	53.4351		pi.1[6397]	0.7226	0.2485	0.005778	0.07233	0.7944	0.9923	3001	5000		beta.i[6397]	0.0007961	0.03173	0.0004613	-0.06008	0.0008185	0.06429	3001	5000
Zv9_00001931 Zv9_00001934 Zv9_00001930 Zv9_00001933 Zv9_00001932	63.6699	6.10388	10.1335	39.1488	10.4082	5.49532	4.9156	9.18518		pi.1[267]	0.4471	0.1724	0.002122	0.07246	0.462	0.7406	3001	5000		beta.i[267]	0.001899	0.03158	0.000457	-0.06105	0.002047	0.06328	3001	5000
Zv9_00003514 Zv9_00003516 Zv9_00003515 Zv9_00003513	38.9647	15.8389	15.2559	7.98911	6.25769	4.00115	3.67447	10.0584		pi.1[505]	0.4796	0.1824	0.002502	0.07248	0.4989	0.7785	3001	5000		beta.i[505]	0.003226	0.03187	0.0004619	-0.05969	0.003369	0.06468	3001	5000
Zv9_00045068	1.42689	1.45392	2.45286	22.8775	19.5546	6.46342	5.063	4.78385		pi.1[6276]	0.6919	0.2493	0.005288	0.0725	0.7513	0.9901	3001	5000		beta.i[6276]	0.001266	0.03181	0.0005075	-0.061	0.001112	0.06417	3001	5000
Zv9_00036553 Zv9_00036554 Zv9_00036556 Zv9_00036555	1.3458	1.36768	1.59015	1.05649	1.32107	23.9399	21.1267	16.1447		pi.1[5071]	0.6821	0.2514	0.005484	0.07254	0.7388	0.9889	3001	5000		beta.i[5071]	0.0006209	0.03147	0.000375	-0.06053	0.0003693	0.06138	3001	5000
Zv9_00021145 Zv9_00021144 Zv9_00021146 Zv9_00021143	19.7158	19.2524	11.9901	6.9654	3.21435	4.10215	7.64825	4.86312		pi.1[2939]	0.5084	0.1986	0.004118	0.07266	0.5331	0.8192	3001	5000		beta.i[2939]	0.003384	0.03144	0.0005487	-0.05921	0.003358	0.06504	3001	5000
Zv9_00039769 Zv9_00039770	5.39205	2.02889	1.68373	2.93235	5.55485	10.652	13.4739	29.1642		pi.1[5522]	0.6442	0.2341	0.004798	0.07267	0.6922	0.958	3001	5000		beta.i[5522]	0.001775	0.03086	0.0004386	-0.05901	0.001967	0.06232	3001	5000
Zv9_00009786 Zv9_00009785 Zv9_00009784	3.39458	5.48468	7.78365	6.41873	1.38628	8.28222	9.2686	17.9682		pi.1[1408]	0.6702	0.2478	0.005623	0.07289	0.7275	0.981	3001	5000		beta.i[1408]	0.001304	0.03211	0.0004378	-0.06202	0.001421	0.06429	3001	5000
Zv9_00026043	150.815	47.1736	26.2305	8.46374	2.12534	2.67245	2.58233	7.15239		pi.1[3599]	0.4171	0.1579	0.002238	0.0729	0.4317	0.6891	3001	5000		beta.i[3599]	0.004037	0.03178	0.0005349	-0.05792	0.003751	0.06565	3001	5000
Zv9_00022332	1.12349	1.12143	1.0868	1.08762	1.27289	15.8595	40.6012	11.7343		pi.1[3097]	0.6793	0.2569	0.005239	0.07292	0.7366	0.9887	3001	5000		beta.i[3097]	-7.809e-05	0.03135	0.0004309	-0.06187	0.0005312	0.06057	3001	5000
Zv9_00020710 Zv9_00020711	1.36737	1.03857	1.09844	2.10343	12.5671	13.8663	10.4673	8.70799		pi.1[2889]	0.6971	0.2513	0.005614	0.07296	0.7565	0.9897	3001	5000		beta.i[2889]	0.000223	0.03117	0.0004686	-0.06071	1.296e-05	0.0606	3001	5000
Zv9_00049814 Zv9_00049811 Zv9_00049812 Zv9_00049813	1.12728	1	3.72848	9.49058	5.85023	11.359	6.53433	15.5534		pi.1[6942]	0.7091	0.2484	0.005846	0.07304	0.7757	0.9926	3001	5000		beta.i[6942]	0.000897	0.03133	0.0004273	-0.06055	0.001189	0.06155	3001	5000
Zv9_00001618	2.28311	2.44855	1.79472	3.20475	5.31937	8.37572	9.06087	23.3227		pi.1[223]	0.7062	0.2523	0.006435	0.07318	0.7745	0.9905	3001	5000		beta.i[223]	0.0007279	0.03145	0.0004543	-0.06061	0.0002429	0.06377	3001	5000
Zv9_00030071	30.4098	24.6224	6.15277	2.80486	5.15117	8.5171	8.47279	15.0157		pi.1[4156]	0.4987	0.1861	0.003068	0.07329	0.5248	0.7934	3001	5000		beta.i[4156]	0.003201	0.03183	0.0005229	-0.05871	0.002675	0.06459	3001	5000
Zv9_00057683 Zv9_00057682 Zv9_00057681 Zv9_00057680	1	23.3785	41.2691	40.1683	1	1	1	1		pi.1[8018]	0.6339	0.2455	0.004885	0.07342	0.6709	0.9799	3001	5000		beta.i[8018]	0.0002346	0.03134	0.0005956	-0.06041	0.0003087	0.06109	3001	5000
Zv9_00017337	1	1.00455	1.02547	1.64799	8.81952	16.6093	16.8515	8.43378		pi.1[2406]	0.6916	0.2497	0.005536	0.07344	0.7495	0.9898	3001	5000		beta.i[2406]	0.0006523	0.03227	0.0005701	-0.06227	0.00075	0.06339	3001	5000
Zv9_00053371 Zv9_00053374 Zv9_00053372 Zv9_00053375 Zv9_00053373	1	8.66329	14.613	26.3017	8.99222	1	1	1		pi.1[7432]	0.663	0.2557	0.004809	0.07364	0.7166	0.9902	3001	5000		beta.i[7432]	0.0007667	0.03135	0.0004571	-0.05831	0.0004323	0.06166	3001	5000
Zv9_00022030 Zv9_00022032 Zv9_00022031	1.27992	1	6.89746	14.4625	6.66342	9.38245	7.03397	5.35068		pi.1[3056]	0.6952	0.2546	0.005893	0.07372	0.7612	0.9923	3001	5000		beta.i[3056]	0.0009169	0.03172	0.0004643	-0.06255	0.001055	0.06158	3001	5000
Zv9_00026898	1.12112	1	3.30442	6.411	6.64957	7.97643	7.56274	16.7202		pi.1[3716]	0.7073	0.2553	0.00545	0.07378	0.7759	0.9922	3001	5000		beta.i[3716]	0.0005984	0.03164	0.00041	-0.06151	0.0006392	0.06178	3001	5000
Zv9_00025511 Zv9_00025512	1	3.67495	2.05994	6.62564	82.2053	5.67327	2.50311	47.6044		pi.1[3523]	0.6736	0.248	0.004589	0.07383	0.7243	0.9871	3001	5000		beta.i[3523]	0.001491	0.03163	0.0006039	-0.06116	0.001759	0.06495	3001	5000
Zv9_00022859 Zv9_00022855 Zv9_00022857 Zv9_00022858 Zv9_00022856 Zv9_00022854	1	1	1.01576	1.0038	5.45567	16.5866	17.3672	10.9077		pi.1[3174]	0.6877	0.2512	0.005659	0.07385	0.7464	0.9875	3001	5000		beta.i[3174]	0.001196	0.03184	0.0004389	-0.06207	0.00145	0.06236	3001	5000
Zv9_00057329 Zv9_00057328	41.696	8.32814	11.1481	11.9662	2.85815	7.5114	7.49772	28.093		pi.1[7947]	0.4699	0.1834	0.003003	0.07387	0.4915	0.7715	3001	5000		beta.i[7947]	0.003145	0.03167	0.0005004	-0.05919	0.00365	0.06798	3001	5000
Zv9_00023332 Zv9_00023333 Zv9_00023331 Zv9_00023330 Zv9_00023329	34.4463	24.4077	6.43645	9.54101	11.2674	5.41456	3.45103	6.75816		pi.1[3240]	0.489	0.1823	0.002783	0.0739	0.5092	0.7817	3001	5000		beta.i[3240]	0.002017	0.03179	0.0004539	-0.06008	0.001736	0.06492	3001	5000
Zv9_00044586 Zv9_00044587	36.1892	22.384	12.6298	4.55811	2.90396	6.57698	8.46344	5.71243		pi.1[6197]	0.4746	0.1846	0.002628	0.07417	0.4931	0.7748	3001	5000		beta.i[6197]	0.002333	0.03124	0.000398	-0.05833	0.0025	0.06301	3001	5000
Zv9_00037494 Zv9_00037493 Zv9_00037491 Zv9_00037492	9.27929	22.3297	11.8048	7.8141	3.69166	2.69802	2.98394	3.91156		pi.1[5205]	0.5564	0.2163	0.003314	0.07428	0.5871	0.8827	3001	5000		beta.i[5205]	0.00261	0.03156	0.0004197	-0.05828	0.002596	0.06546	3001	5000
Zv9_00020441 Zv9_00020442 Zv9_00020443	9.1391	6.3241	3.03792	2.52074	4.42403	9.11754	11.6822	34.1782		pi.1[2850]	0.5935	0.2165	0.004562	0.07433	0.6305	0.9011	3001	5000		beta.i[2850]	0.00194	0.03187	0.0004678	-0.0601	0.002018	0.06486	3001	5000
Zv9_00007904 Zv9_00007912 Zv9_00007913 Zv9_00007905	1.3745	1.61217	2.17181	3.0939	5.77706	9.7987	11.8915	11.6352		pi.1[1109]	0.7095	0.2498	0.005894	0.07443	0.775	0.9925	3001	5000		beta.i[1109]	0.0001371	0.03186	0.0004668	-0.06304	-0.0001311	0.06213	3001	5000
Zv9_00058004	6.82804	1.00389	197.811	93.9962	4.85476	2.45821	3.04651	1.02239		pi.1[8071]	0.5452	0.2126	0.003537	0.07472	0.5689	0.8836	3001	5000		beta.i[8071]	0.001432	0.03135	0.00052	-0.05785	0.000533	0.06323	3001	5000
Zv9_00057999	4.08141	2.59888	12.2428	29.6799	13.4859	2.56326	2.3727	2.40098		pi.1[8069]	0.6358	0.2384	0.004368	0.07473	0.6711	0.9714	3001	5000		beta.i[8069]	0.001716	0.03121	0.000373	-0.05809	0.001516	0.06471	3001	5000
Zv9_00011945 Zv9_00011944	1.49436	2.59828	2.49914	7.52261	17.9669	5.68486	6.21447	10.3332		pi.1[1710]	0.7041	0.2482	0.00562	0.07488	0.7687	0.9898	3001	5000		beta.i[1710]	0.0007508	0.03203	0.0005108	-0.06219	0.0009564	0.06408	3001	5000
Zv9_00025364	679.366	105.278	27.8921	7.00175	1.69434	1.0171	1.05158	1.01129		pi.1[3502]	0.365	0.1359	0.002237	0.07493	0.3744	0.6009	3001	5000		beta.i[3502]	0.003156	0.03159	0.0008446	-0.05831	0.003451	0.06527	3001	5000
Zv9_00028300	171.017	22.4578	7.01514	4.55991	15.6203	9.95111	9.45969	5.44469		pi.1[3909]	0.4067	0.1574	0.002248	0.07494	0.4194	0.682	3001	5000		beta.i[3909]	0.002884	0.0316	0.0005291	-0.06003	0.003705	0.06435	3001	5000
Zv9_00030515	1	1	1	1	1.33391	14.6376	12.228	104.339		pi.1[4220]	0.7357	0.2433	0.005704	0.07514	0.8084	0.9928	3001	5000		beta.i[4220]	0.0003421	0.03158	0.0004888	-0.0617	0.001251	0.06231	3001	5000
Zv9_00048441	2.92043	1.46767	2.17276	7.75237	18.7078	11.6807	9.48579	3.65306		pi.1[6764]	0.6824	0.2452	0.004753	0.07519	0.7392	0.9869	3001	5000		beta.i[6764]	0.001981	0.0315	0.000496	-0.06032	0.001942	0.06392	3001	5000
Zv9_00044138	88.1474	31.934	18.6985	6.53778	4.95682	6.37451	4.57473	1.99053		pi.1[6115]	0.4352	0.1651	0.002666	0.07522	0.4492	0.7179	3001	5000		beta.i[6115]	0.003843	0.03202	0.0005285	-0.05808	0.003755	0.06641	3001	5000
Zv9_00010033	21.5068	17.4505	10.2094	5.90704	5.38024	6.73452	6.09206	3.5507		pi.1[1442]	0.5113	0.1935	0.002723	0.07548	0.5335	0.8152	3001	5000		beta.i[1442]	0.002497	0.03132	0.000388	-0.05708	0.002331	0.06516	3001	5000
Zv9_00051145	1.53577	1.4996	1.03031	1.38817	8.08538	18.3881	16.3226	7.05766		pi.1[7135]	0.6895	0.2496	0.005228	0.0755	0.7489	0.9921	3001	5000		beta.i[7135]	0.0003641	0.0308	0.0004929	-0.06032	0.0008183	0.06075	3001	5000
Zv9_00011382 Zv9_00011383	70.0127	27.9316	14.031	6.69872	6.76752	5.18776	4.18778	2.18526		pi.1[1640]	0.4395	0.1713	0.002599	0.07574	0.4565	0.7267	3001	5000		beta.i[1640]	0.003188	0.03157	0.0004378	-0.05924	0.003621	0.06664	3001	5000
Zv9_00034190	1.01362	1.00643	1.10894	1.43908	26.6444	8.84163	11.2229	16.9282		pi.1[4758]	0.6831	0.2568	0.006233	0.07575	0.7433	0.9899	3001	5000		beta.i[4758]	0.0003392	0.03121	0.0004029	-0.06177	0.0003259	0.0606	3001	5000
Zv9_00017610 Zv9_00017611	567.251	134.568	20.2264	4.01897	1.31483	1.05184	1.04741	1.00602		pi.1[2447]	0.3626	0.1381	0.002106	0.07586	0.3707	0.6094	3001	5000		beta.i[2447]	0.002894	0.03191	0.000635	-0.06018	0.002568	0.06597	3001	5000
Zv9_00050557 Zv9_00050558 Zv9_00050559 Zv9_00050560 Zv9_00050556	1.62483	1.4404	3.54398	3.68439	6.46482	10.2696	15.76	9.70576		pi.1[7056]	0.71	0.2483	0.005661	0.07596	0.773	0.9898	3001	5000		beta.i[7056]	0.001514	0.03122	0.0003702	-0.05947	0.001321	0.06147	3001	5000
Zv9_00055088	1.15486	1.04657	7.0562	10.3367	26.3822	6.3154	7.03248	3.82365		pi.1[7646]	0.6894	0.2458	0.005018	0.07596	0.7451	0.9888	3001	5000		beta.i[7646]	0.0003349	0.03174	0.0004407	-0.06255	0.0003459	0.06209	3001	5000
Zv9_00016965 Zv9_00016963 Zv9_00016964 Zv9_00016967	26.0492	15.9788	20.8071	10.8705	2.41449	2.79569	6.12809	6.91549		pi.1[2354]	0.4992	0.1926	0.003234	0.07608	0.5222	0.8043	3001	5000		beta.i[2354]	0.003157	0.03122	0.0004782	-0.05845	0.003051	0.06316	3001	5000
Zv9_00028044 Zv9_00028043 Zv9_00028045	42.3302	14.6346	11.7759	7.78338	4.03923	7.0537	6.51063	10.0741		pi.1[3864]	0.4752	0.1795	0.002884	0.07619	0.4949	0.7714	3001	5000		beta.i[3864]	0.002329	0.03147	0.0004159	-0.05932	0.002028	0.06285	3001	5000
Zv9_00055540 Zv9_00055539	24.3426	19.9833	7.379	7.55877	9.34909	4.9004	4.93546	4.36379		pi.1[7701]	0.4962	0.1887	0.003127	0.07655	0.5157	0.7994	3001	5000		beta.i[7701]	0.002646	0.03148	0.0005138	-0.05829	0.002858	0.06396	3001	5000
Zv9_00005224 Zv9_00005228 Zv9_00005226 Zv9_00005221 Zv9_00005225 Zv9_00005222 Zv9_00005227 Zv9_00005220 Zv9_00005223	1	1	310.132	390.535	1	1	1	1		pi.1[754]	0.5407	0.2252	0.003866	0.07677	0.5506	0.9438	3001	5000		beta.i[754]	-0.0002867	0.03239	0.0007104	-0.06177	0.0001152	0.06364	3001	5000
Zv9_00028692	1	1	1	1.01479	26.7896	20.9921	11.6571	6.90622		pi.1[3963]	0.6745	0.2529	0.005347	0.07683	0.7279	0.9887	3001	5000		beta.i[3963]	0.0005212	0.03183	0.0004791	-0.06389	0.0002807	0.06226	3001	5000
Zv9_00033717 Zv9_00033716	21.9742	27.3789	7.85566	3.67365	2.45638	6.90397	6.35073	18.9588		pi.1[4693]	0.5094	0.1933	0.003067	0.07688	0.5289	0.8191	3001	5000		beta.i[4693]	0.002413	0.03155	0.0004904	-0.05896	0.0022	0.06521	3001	5000
Zv9_00002428 Zv9_00002427	55.2718	23.225	27.021	27.2439	3.20048	1.07294	1	1		pi.1[352]	0.4503	0.1727	0.002354	0.0769	0.4629	0.7448	3001	5000		beta.i[352]	0.003277	0.03179	0.0005611	-0.05851	0.003246	0.06686	3001	5000
Zv9_00035835 Zv9_00035833 Zv9_00035830 Zv9_00035832 Zv9_00035834 Zv9_00035831	16.5098	21.4382	17.0458	10.5086	15.2176	1	1	1		pi.1[4972]	0.5132	0.1963	0.002595	0.07698	0.5348	0.8242	3001	5000		beta.i[4972]	0.001974	0.03086	0.0004769	-0.05934	0.002525	0.06232	3001	5000
Zv9_00049070 Zv9_00049071	240.365	25.7725	4.10439	6.21464	6.56534	16.9625	17.5111	10.2037		pi.1[6855]	0.4032	0.1484	0.002206	0.0772	0.414	0.6577	3001	5000		beta.i[6855]	0.003694	0.0318	0.0005333	-0.05936	0.003668	0.0647	3001	5000
Zv9_00040631 Zv9_00040629 Zv9_00040630	10.693	29.5171	6.55675	3.07264	4.7373	4.19832	6.05529	8.1358		pi.1[5633]	0.5434	0.2116	0.002992	0.0775	0.5712	0.8731	3001	5000		beta.i[5633]	0.001837	0.03174	0.0003879	-0.05975	0.002207	0.06512	3001	5000
Zv9_00040980	3.12549	1.07041	63.8675	112.234	5.09692	1.07362	1.0432	1		pi.1[5681]	0.6099	0.2415	0.004525	0.07754	0.6401	0.969	3001	5000		beta.i[5681]	0.001216	0.03139	0.0005383	-0.05983	0.0002827	0.06257	3001	5000
Zv9_00023513 Zv9_00023514	53.6489	43.1813	15.2847	3.98589	4.45273	3.96008	3.50418	5.79178		pi.1[3264]	0.4588	0.1727	0.002259	0.07769	0.4726	0.748	3001	5000		beta.i[3264]	0.002966	0.03133	0.0005326	-0.06043	0.002979	0.06386	3001	5000
Zv9_00008132	6.75916	1.05217	203.569	57.2611	12.8889	1.08574	1	1		pi.1[1141]	0.5438	0.2115	0.003467	0.07798	0.5644	0.8897	3001	5000		beta.i[1141]	0.001943	0.03192	0.000512	-0.06038	0.002009	0.06467	3001	5000
Zv9_00057595 Zv9_00057596	1	1	1	1	1.44444	33.3902	23.1562	17.8058		pi.1[8004]	0.6935	0.2496	0.006701	0.07824	0.7476	0.9905	3001	5000		beta.i[8004]	-0.0002102	0.032	0.0004953	-0.061	-0.0005582	0.06315	3001	5000
Zv9_00057767	1.45801	1.76183	10.1101	15.962	8.32452	5.51375	4.64704	3.2056		pi.1[8032]	0.6903	0.253	0.00603	0.07829	0.7501	0.9918	3001	5000		beta.i[8032]	0.0003947	0.03124	0.0005244	-0.06097	0.0003367	0.06145	3001	5000
Zv9_00017599 Zv9_00017601 Zv9_00017598 Zv9_00017600	1	1	1	1.04276	5.09632	21.8972	13.9495	14.7442		pi.1[2444]	0.6963	0.2481	0.005514	0.07835	0.7544	0.9883	3001	5000		beta.i[2444]	0.0004374	0.03123	0.0004698	-0.06144	0.001249	0.05916	3001	5000
Zv9_00000244	1.03489	1.14119	1.16389	1.18312	3.56918	19.9015	16.5481	15.0522		pi.1[41]	0.6963	0.2511	0.005866	0.07841	0.7526	0.991	3001	5000		beta.i[41]	-0.0001757	0.03184	0.0004936	-0.06183	9.736e-05	0.06229	3001	5000
Zv9_00007918	89.4704	15.5094	4.52749	5.97162	8.97646	11.5998	9.49546	10.2079		pi.1[1110]	0.4373	0.1657	0.002302	0.07844	0.4516	0.7199	3001	5000		beta.i[1110]	0.003035	0.03162	0.000563	-0.06007	0.003386	0.06234	3001	5000
Zv9_00033390 Zv9_00033391	1.9618	1.45158	1.68807	2.2791	1.92788	7.69863	17.1919	32.5963		pi.1[4643]	0.6997	0.2527	0.006746	0.07845	0.7657	0.9894	3001	5000		beta.i[4643]	0.0007941	0.03172	0.0005392	-0.06139	0.000776	0.06277	3001	5000
Zv9_00044950 Zv9_00044951 Zv9_00044949	49.1434	26.3263	24.076	8.30654	8.98017	2.90414	2.32193	1.65227		pi.1[6252]	0.4684	0.1745	0.003159	0.0785	0.487	0.7524	3001	5000		beta.i[6252]	0.002498	0.03194	0.0005868	-0.06173	0.001888	0.06546	3001	5000
Zv9_00049984 Zv9_00049985	26.2879	15.7653	21.724	13.6018	4.02476	4.67699	3.30529	2.16573		pi.1[6962]	0.496	0.1878	0.003042	0.07853	0.5154	0.7987	3001	5000		beta.i[6962]	0.001058	0.03155	0.0004707	-0.05957	0.0009858	0.06203	3001	5000
Zv9_00016227 Zv9_00016231 Zv9_00016229 Zv9_00016228 Zv9_00016230	1.98702	2.71977	1.68221	2.24801	4.30313	12.4811	16.872	10.0426		pi.1[2253]	0.6953	0.2512	0.00508	0.07854	0.761	0.9885	3001	5000		beta.i[2253]	0.001072	0.03155	0.0004841	-0.05948	0.000768	0.06354	3001	5000
Zv9_00008930	1	1	18.0738	98.7947	16.723	1	1	1		pi.1[1268]	0.6366	0.245	0.004763	0.07856	0.6696	0.986	3001	5000		beta.i[1268]	0.001291	0.03132	0.0005005	-0.05972	0.00101	0.0654	3001	5000
Zv9_00036615	1	1	1	2.71068	4.54938	12.1213	10.5424	27.9372		pi.1[5080]	0.713	0.2503	0.005253	0.07929	0.7781	0.9937	3001	5000		beta.i[5080]	-0.0002174	0.03131	0.0004696	-0.06027	-0.001068	0.06125	3001	5000
Zv9_00050083 Zv9_00050084	13.4434	19.4301	39.8599	26.874	1.24862	1.05358	1.27693	2.55538		pi.1[6980]	0.5283	0.1994	0.003454	0.07958	0.5498	0.8466	3001	5000		beta.i[6980]	0.001389	0.03093	0.000437	-0.05952	0.00102	0.06241	3001	5000
Zv9_00010046	1.93655	3.01962	15.4389	25.6011	6.68242	3.23828	3.28476	2.10606		pi.1[1445]	0.6705	0.2498	0.005393	0.07988	0.7214	0.9866	3001	5000		beta.i[1445]	0.0009119	0.03163	0.0005393	-0.06119	0.0006377	0.06269	3001	5000
Zv9_00001142	1.20089	1.07004	4.59705	7.18929	6.61631	5.62957	8.39174	20.0047		pi.1[168]	0.7161	0.2503	0.006163	0.0799	0.7805	0.9937	3001	5000		beta.i[168]	-0.0001552	0.03159	0.0005602	-0.06131	-0.001366	0.06259	3001	5000
Zv9_00028675 Zv9_00028681 Zv9_00028680 Zv9_00028679 Zv9_00028676	1.00777	1.07318	1.02428	1.18795	89.7639	18.1591	13.3974	5.16939		pi.1[3959]	0.6466	0.2469	0.005089	0.0799	0.689	0.9848	3001	5000		beta.i[3959]	0.001513	0.03156	0.0004726	-0.0597	0.001438	0.06295	3001	5000
Zv9_00015668	49.1236	7.12596	6.04742	11.076	17.8869	11.1789	8.62281	4.64858		pi.1[2165]	0.4653	0.1731	0.002874	0.07995	0.4865	0.7543	3001	5000		beta.i[2165]	0.002924	0.03175	0.0005372	-0.059	0.003089	0.06462	3001	5000
Zv9_00016371	3.78622	3.35301	14.6339	29.8163	8.69095	2.86088	3.16655	1.35657		pi.1[2279]	0.6412	0.2367	0.004701	0.07996	0.6795	0.9709	3001	5000		beta.i[2279]	0.000915	0.03145	0.0004652	-0.06147	0.001482	0.06136	3001	5000
Zv9_00042398 Zv9_00042400 Zv9_00042396 Zv9_00042399 Zv9_00042397	1.08437	1.1406	1.27015	1.81543	11.4944	18.2041	13.7915	4.30563		pi.1[5873]	0.6807	0.2542	0.005567	0.08036	0.7395	0.9897	3001	5000		beta.i[5873]	0.0006863	0.0324	0.0004737	-0.06253	0.000162	0.06364	3001	5000
Zv9_00046630 Zv9_00046631	65.8903	20.0517	8.67452	6.01212	7.55709	8.89858	9.06895	4.14549		pi.1[6499]	0.4542	0.1715	0.002465	0.08064	0.469	0.745	3001	5000		beta.i[6499]	0.004209	0.03197	0.0004541	-0.05839	0.004386	0.06716	3001	5000
Zv9_00014538	42.4718	8.2387	9.04536	5.27459	6.22321	9.53853	11.8126	22.9804		pi.1[2016]	0.4852	0.1806	0.00269	0.08068	0.5067	0.7789	3001	5000		beta.i[2016]	0.002838	0.03171	0.0004643	-0.06015	0.002363	0.06567	3001	5000
Zv9_00033120 Zv9_00033121 Zv9_00033122 Zv9_00033119 Zv9_00033124	8.85866	8.56402	14.4012	4.53186	4.6585	3.71128	4.96516	28.8675		pi.1[4596]	0.5788	0.2139	0.003996	0.08076	0.6158	0.8929	3001	5000		beta.i[4596]	0.002589	0.0319	0.0004676	-0.05825	0.001928	0.06601	3001	5000
Zv9_00038923	1.28685	1.12543	1.18216	1.44896	6.74566	14.7571	15.9893	8.66707		pi.1[5411]	0.6922	0.2549	0.005826	0.08077	0.7565	0.9921	3001	5000		beta.i[5411]	0.0006873	0.03166	0.0004194	-0.06087	0.0005695	0.06284	3001	5000
Zv9_00037327 Zv9_00037326	1.68709	1.62861	11.1864	16.7951	1	11.4156	16.0625	18.506		pi.1[5181]	0.6929	0.2452	0.005466	0.08081	0.7502	0.9879	3001	5000		beta.i[5181]	0.001303	0.03168	0.0005446	-0.06072	0.001893	0.06353	3001	5000
Zv9_00003306 Zv9_00003305	31.0956	22.7485	17.7055	5.15872	4.31182	4.31338	5.03222	6.26465		pi.1[477]	0.4913	0.1846	0.00262	0.08108	0.5111	0.7874	3001	5000		beta.i[477]	0.002905	0.03183	0.0004435	-0.05955	0.00287	0.06459	3001	5000
Zv9_00031406	1.08371	1.03479	2.67004	14.16	13.2187	5.72622	5.9703	6.20022		pi.1[4354]	0.6875	0.2544	0.005362	0.08112	0.7461	0.9906	3001	5000		beta.i[4354]	-9.884e-05	0.03165	0.0004809	-0.06228	0.0001372	0.06374	3001	5000
Zv9_00030209	53.772	12.9289	5.31092	4.55912	6.75078	15.537	15.1516	11.9129		pi.1[4176]	0.4734	0.1739	0.002529	0.08131	0.4881	0.7624	3001	5000		beta.i[4176]	0.004135	0.03198	0.0005257	-0.05751	0.003632	0.06855	3001	5000
Zv9_00039330	2.48135	1.55458	2.4785	3.42822	2.44827	20.0068	11.6191	19.1543		pi.1[5463]	0.6977	0.2486	0.00525	0.0814	0.755	0.9911	3001	5000		beta.i[5463]	0.0008275	0.03202	0.0005044	-0.06133	0.0001337	0.06399	3001	5000
Zv9_00021847	2.04084	1.88076	2.38487	2.07592	1.25203	10.8106	16.385	34.5586		pi.1[3039]	0.7085	0.2489	0.005846	0.08143	0.771	0.9916	3001	5000		beta.i[3039]	0.0007744	0.03208	0.000505	-0.06296	0.0009153	0.0626	3001	5000
Zv9_00005475	8.13632	28.4253	17.4879	7.82703	3.59221	2.99725	2.44565	3.54682		pi.1[786]	0.5788	0.215	0.003486	0.08159	0.6115	0.896	3001	5000		beta.i[786]	0.001302	0.03104	0.0005158	-0.05922	0.00107	0.06174	3001	5000
Zv9_00054840 Zv9_00054841 Zv9_00054839	1.33347	1.46757	1.38813	1.06487	6.97374	10.57	20.8528	15.7851		pi.1[7613]	0.7019	0.2475	0.005512	0.08179	0.7672	0.989	3001	5000		beta.i[7613]	0.0007412	0.03201	0.0005284	-0.06176	0.0009741	0.06339	3001	5000
Zv9_00032198 Zv9_00032197	16.3047	28.2831	5.93781	6.12331	4.78633	6.36528	7.15192	9.02612		pi.1[4478]	0.5325	0.199	0.003589	0.08208	0.5555	0.8411	3001	5000		beta.i[4478]	0.003186	0.03091	0.0003991	-0.05843	0.003402	0.06363	3001	5000
Zv9_00056242 Zv9_00056240 Zv9_00056243 Zv9_00056245 Zv9_00056241 Zv9_00056239 Zv9_00056244	10.091	1	37.6269	27.8347	26.4342	19.629	1	1		pi.1[7798]	0.5453	0.2046	0.003507	0.08217	0.5693	0.8702	3001	5000		beta.i[7798]	0.001821	0.03157	0.0004969	-0.06103	0.001878	0.06488	3001	5000
Zv9_00013146 Zv9_00013147 Zv9_00013145	1.00828	1.02749	1.01978	1.2473	33.702	12.8393	10.316	14.1818		pi.1[1841]	0.6846	0.2485	0.005527	0.08224	0.7433	0.9902	3001	5000		beta.i[1841]	0.0002439	0.0317	0.0005052	-0.06117	0.0009227	0.06264	3001	5000
Zv9_00032908	25.9109	36.6667	9.88942	5.06885	5.63923	4.31499	3.72837	5.53947		pi.1[4557]	0.4951	0.1894	0.002444	0.0823	0.5155	0.7992	3001	5000		beta.i[4557]	0.002744	0.03151	0.0004634	-0.06014	0.00276	0.06555	3001	5000
Zv9_00010012	1.28238	1.02556	6.95112	4.05747	5.93755	11.1708	13.4459	8.6102		pi.1[1439]	0.6981	0.2534	0.005636	0.08233	0.764	0.9893	3001	5000		beta.i[1439]	0.0006199	0.03179	0.0004911	-0.06195	0.0004429	0.06437	3001	5000
Zv9_00020109 Zv9_00020108	19.5883	31.1048	27.2426	17.5228	1.55895	1.72584	1.26092	1.38538		pi.1[2789]	0.5091	0.1897	0.002873	0.08235	0.5292	0.8153	3001	5000		beta.i[2789]	0.001349	0.03172	0.0005314	-0.06191	0.001437	0.06157	3001	5000
Zv9_00023559	21.3304	17.2604	20.4934	17.8413	5.87799	1.11828	1.09733	1.07244		pi.1[3271]	0.5013	0.1933	0.003194	0.08238	0.5247	0.8109	3001	5000		beta.i[3271]	0.0006822	0.03219	0.0004335	-0.06323	0.0007091	0.06387	3001	5000
Zv9_00014063	14.766	34.9056	18.5468	102.743	1	1	1	1		pi.1[1954]	0.4989	0.1937	0.002552	0.0825	0.5168	0.8248	3001	5000		beta.i[1954]	0.002672	0.03167	0.0005507	-0.0595	0.002534	0.06397	3001	5000
Zv9_00021653 Zv9_00021652 Zv9_00021654	1	3.65614	5.07418	1	15.2857	11.2717	12.7625	14.9866		pi.1[3013]	0.6997	0.2515	0.005662	0.08253	0.7628	0.9923	3001	5000		beta.i[3013]	0.0006813	0.03157	0.0004125	-0.06212	0.0006384	0.06223	3001	5000
Zv9_00029075	51.1958	18.8636	10.5636	5.40274	7.62677	5.04927	6.42205	11.6044		pi.1[4012]	0.467	0.1739	0.002806	0.08263	0.4847	0.755	3001	5000		beta.i[4012]	0.003862	0.03132	0.0005556	-0.05822	0.003763	0.06481	3001	5000
Zv9_00019782 Zv9_00019781 Zv9_00019780	2.9259	1.2064	1.10814	1.11885	2.4676	16.1114	26.3628	19.6833		pi.1[2741]	0.6823	0.2423	0.005711	0.08282	0.7362	0.9863	3001	5000		beta.i[2741]	0.001129	0.03163	0.0004755	-0.06127	0.001301	0.06318	3001	5000
Zv9_00050175	1.36546	1.14688	8.40616	37.1624	13.4855	4.24531	3.24896	3.55095		pi.1[6994]	0.6827	0.247	0.005756	0.08317	0.7344	0.9898	3001	5000		beta.i[6994]	6.898e-05	0.03136	0.0004038	-0.06257	0.0003661	0.06063	3001	5000
Zv9_00057842 Zv9_00057841	38.9981	12.1497	4.0994	5.14977	17.6458	9.84716	9.14677	11.0699		pi.1[8047]	0.4824	0.1815	0.002357	0.08321	0.5029	0.7761	3001	5000		beta.i[8047]	0.001519	0.03198	0.0005457	-0.06072	0.001726	0.06554	3001	5000
Zv9_00004399	22.2188	26.8247	11.4971	5.20308	6.91432	5.93234	4.53145	4.87877		pi.1[631]	0.516	0.1935	0.002758	0.08327	0.5426	0.8217	3001	5000		beta.i[631]	0.002458	0.03161	0.0004367	-0.06061	0.002739	0.06392	3001	5000
Zv9_00005135 Zv9_00005136 Zv9_00005137 Zv9_00005134	126.535	38.446	12.9055	7.85766	5.24852	4.20446	4.62566	4.42635		pi.1[738]	0.4221	0.1594	0.002393	0.08336	0.4351	0.6971	3001	5000		beta.i[738]	0.003648	0.03179	0.0005619	-0.05914	0.003804	0.06468	3001	5000
Zv9_00034731 Zv9_00034733 Zv9_00034732 Zv9_00034729 Zv9_00034730	36.045	1	96.1055	102.038	118.658	1	1	1		pi.1[4825]	0.4579	0.1725	0.002655	0.08363	0.47	0.7548	3001	5000		beta.i[4825]	0.001468	0.03124	0.000555	-0.05896	0.001391	0.06295	3001	5000
Zv9_00025702 Zv9_00025699 Zv9_00025696 Zv9_00025701 Zv9_00025700 Zv9_00025697 Zv9_00025698	1.94551	3.98878	3.47799	2.7605	1.82675	10.3684	19.5278	18.5347		pi.1[3552]	0.7075	0.2464	0.005421	0.08373	0.7752	0.9903	3001	5000		beta.i[3552]	0.001077	0.03163	0.0005162	-0.05991	0.0003801	0.06552	3001	5000
Zv9_00033573	1	1	1	1.06696	4.07828	18.2535	17.1898	13.9229		pi.1[4674]	0.6981	0.2471	0.005957	0.0838	0.755	0.9904	3001	5000		beta.i[4674]	0.0001812	0.03185	0.0004693	-0.06073	0.0001255	0.06228	3001	5000
Zv9_00035710 Zv9_00035709	1.33056	1.21643	1.13294	2.62538	6.53336	11.9315	11.0814	19.104		pi.1[4954]	0.717	0.2466	0.005407	0.08381	0.7821	0.9921	3001	5000		beta.i[4954]	0.0004366	0.03173	0.0004535	-0.06196	0.000713	0.06357	3001	5000
Zv9_00025711	32.621	16.7799	19.7016	17.1438	5.36642	3.92861	2.39368	1.64439		pi.1[3555]	0.4842	0.1817	0.003183	0.08394	0.5062	0.782	3001	5000		beta.i[3555]	0.001719	0.03191	0.0005503	-0.05937	0.00173	0.06638	3001	5000
Zv9_00029425 Zv9_00029423 Zv9_00029424 Zv9_00029426	5.4714	3.22444	13.1896	34.0925	11.1368	2.28116	2.39574	2.53763		pi.1[4068]	0.605	0.2294	0.004065	0.08422	0.6376	0.9366	3001	5000		beta.i[4068]	0.0008577	0.03161	0.0004621	-0.06029	0.000372	0.06459	3001	5000
Zv9_00043382	1	1	1.17938	1.0504	1.24657	23.5463	45.7755	9.12058		pi.1[6000]	0.6606	0.2486	0.004971	0.08422	0.7018	0.9874	3001	5000		beta.i[6000]	0.0005237	0.03127	0.0004835	-0.06147	0.0006866	0.0611	3001	5000
Zv9_00000967 Zv9_00000964 Zv9_00000969 Zv9_00000968 Zv9_00000965	26.7189	16.6634	15.549	11.8819	5.9301	4.71813	2.79526	5.0572		pi.1[140]	0.5051	0.1879	0.003277	0.08454	0.5296	0.8048	3001	5000		beta.i[140]	0.001769	0.0314	0.0005513	-0.06045	0.002314	0.06297	3001	5000
Zv9_00031923 Zv9_00031922	21.4866	23.138	7.59854	3.49844	3.42368	12.168	9.68933	7.54315		pi.1[4438]	0.5166	0.1906	0.003072	0.08462	0.5397	0.8162	3001	5000		beta.i[4438]	0.00253	0.03196	0.000516	-0.06065	0.002645	0.06447	3001	5000
Zv9_00043496	35.8292	23.7874	20.8474	12.8368	1.70085	3.82459	4.30551	7.51652		pi.1[6014]	0.4893	0.183	0.002598	0.08481	0.511	0.7857	3001	5000		beta.i[6014]	0.003405	0.03143	0.0004957	-0.05847	0.003421	0.06352	3001	5000
Zv9_00042222 Zv9_00042223	37.9057	15.4685	12.2795	6.88012	3.72616	5.86224	6.49745	13.9776		pi.1[5854]	0.4883	0.1793	0.002482	0.08486	0.5084	0.7775	3001	5000		beta.i[5854]	0.002304	0.03099	0.0005067	-0.05811	0.002087	0.06396	3001	5000
Zv9_00035178 Zv9_00035177	11.6664	14.9661	17.2879	59.0794	3.30525	1.80788	1.11936	1		pi.1[4884]	0.5426	0.199	0.003228	0.08502	0.5681	0.8549	3001	5000		beta.i[4884]	0.0009744	0.03137	0.0005261	-0.05778	0.0006024	0.06214	3001	5000
Zv9_00017613	47.2821	20.852	12.8671	6.00789	5.30278	6.80087	6.13768	4.02711		pi.1[2449]	0.4682	0.1748	0.002248	0.08503	0.4839	0.7595	3001	5000		beta.i[2449]	0.002995	0.03176	0.0004941	-0.05943	0.002982	0.06421	3001	5000
Zv9_00050940	25.5515	22.7563	9.55802	9.18295	2.88291	5.12414	5.06256	13.6625		pi.1[7109]	0.5025	0.1902	0.003354	0.08513	0.5263	0.8055	3001	5000		beta.i[7109]	0.002419	0.03149	0.0004027	-0.05628	0.002294	0.06334	3001	5000
Zv9_00048414 Zv9_00048415 Zv9_00048413	1.19539	1.08907	4.25755	40.6872	91.5906	2.1139	1.20119	2.39684		pi.1[6759]	0.6344	0.2491	0.005164	0.08541	0.6692	0.9866	3001	5000		beta.i[6759]	0.0006591	0.03157	0.0004448	-0.06273	0.0006985	0.06296	3001	5000
Zv9_00005078 Zv9_00005076 Zv9_00005075 Zv9_00005079 Zv9_00005074 Zv9_00005077	1.98927	1.84802	6.87118	20.7367	14.3213	3.01587	2.82916	10.5474		pi.1[728]	0.6858	0.2467	0.005274	0.08543	0.742	0.9879	3001	5000		beta.i[728]	0.0002213	0.0315	0.0004956	-0.0608	2.172e-05	0.06129	3001	5000
Zv9_00010365 Zv9_00010363 Zv9_00010364	1	1	1.13892	1.87808	8.19558	15.6492	19.581	6.84932		pi.1[1503]	0.6833	0.2464	0.005038	0.08558	0.7394	0.9875	3001	5000		beta.i[1503]	0.0003273	0.03158	0.0004167	-0.06298	0.0004657	0.06168	3001	5000
Zv9_00038195 Zv9_00038194	60.4757	29.7036	8.04671	4.45809	4.89836	7.38058	7.74659	8.20743		pi.1[5314]	0.4596	0.173	0.002571	0.08558	0.4784	0.7458	3001	5000		beta.i[5314]	0.002781	0.03126	0.0004256	-0.05842	0.002518	0.06351	3001	5000
Zv9_00013911	75.3847	22.768	12.508	13.4853	5.10152	4.97921	4.48984	9.94018		pi.1[1932]	0.4548	0.1673	0.002736	0.08567	0.4704	0.7377	3001	5000		beta.i[1932]	0.00317	0.03138	0.0004635	-0.05865	0.003372	0.06431	3001	5000
Zv9_00025725	21.7539	25.0474	10.3764	7.8997	8.63552	5.54747	4.82962	2.70712		pi.1[3556]	0.5188	0.1862	0.00318	0.08572	0.5408	0.8144	3001	5000		beta.i[3556]	0.002954	0.03161	0.0005226	-0.05857	0.002925	0.06563	3001	5000
Zv9_00011406 Zv9_00011408 Zv9_00011404 Zv9_00011403 Zv9_00011405 Zv9_00011407	1.04033	1.02606	2.69496	16.4494	112.703	5.37427	3.23864	1.74096		pi.1[1642]	0.6423	0.2439	0.005281	0.08582	0.6811	0.9819	3001	5000		beta.i[1642]	0.0003315	0.03163	0.0005021	-0.06034	5.482e-05	0.062	3001	5000
Zv9_00054354	65.2889	25.0215	7.3912	7.07506	6.66571	6.14073	6.63008	5.33193		pi.1[7550]	0.4511	0.1679	0.002919	0.0859	0.4658	0.7321	3001	5000		beta.i[7550]	0.002048	0.03158	0.0004404	-0.06036	0.002457	0.06277	3001	5000
Zv9_00001626 Zv9_00001624 Zv9_00001625 Zv9_00001629 Zv9_00001627 Zv9_00001628 Zv9_00001623	1.12088	1.10962	1.48716	3.02517	4.3319	18.1543	16.8368	10.047		pi.1[224]	0.7083	0.247	0.005489	0.08595	0.772	0.9904	3001	5000		beta.i[224]	0.001177	0.03117	0.0005149	-0.05969	0.001325	0.06222	3001	5000
Zv9_00028438	8.82222	3.93631	10.9553	19.7507	8.80922	5.39771	4.54002	3.06133		pi.1[3931]	0.5708	0.2146	0.003485	0.08603	0.6026	0.8909	3001	5000		beta.i[3931]	0.001337	0.03127	0.0005233	-0.06003	0.0011	0.06296	3001	5000
Zv9_00054623	46.5979	24.229	23.451	19.2741	6.43754	1.15948	1.01906	1		pi.1[7583]	0.467	0.1744	0.002703	0.08616	0.484	0.7599	3001	5000		beta.i[7583]	0.002849	0.03125	0.0004742	-0.05794	0.002643	0.06643	3001	5000
Zv9_00011473 Zv9_00011471 Zv9_00011470	2.44242	1.4249	1.41393	1.62168	19.6039	21.5505	9.02529	7.47928		pi.1[1650]	0.6759	0.2491	0.005529	0.08634	0.7324	0.9861	3001	5000		beta.i[1650]	0.002229	0.03185	0.0005667	-0.06056	0.002947	0.06396	3001	5000
Zv9_00004550 Zv9_00004549 Zv9_00004553 Zv9_00004551 Zv9_00004552 Zv9_00004548	46.4512	32.3838	9.14438	8.44693	6.52876	6.86154	6.00083	3.02412		pi.1[659]	0.4799	0.1733	0.002527	0.08639	0.4992	0.7675	3001	5000		beta.i[659]	0.002507	0.03122	0.0004869	-0.05744	0.002292	0.06378	3001	5000
Zv9_00032125	1	1.00383	1	1.06541	3.81415	28.3374	20.7767	11.5292		pi.1[4470]	0.6988	0.2406	0.005584	0.08646	0.7465	0.9901	3001	5000		beta.i[4470]	0.0002571	0.0317	0.0004426	-0.06178	-0.0002655	0.06328	3001	5000
Zv9_00029076	50.2656	17.0418	12.0092	10.1919	6.51718	4.57131	5.71617	7.56209		pi.1[4013]	0.4752	0.1735	0.002764	0.08649	0.4984	0.7543	3001	5000		beta.i[4013]	0.002306	0.03192	0.0005137	-0.05955	0.002383	0.0641	3001	5000
Zv9_00014721	52.683	19.0148	8.49915	8.18738	5.4593	7.67033	6.79156	6.90051		pi.1[2031]	0.4671	0.172	0.002345	0.08671	0.4842	0.7511	3001	5000		beta.i[2031]	0.003062	0.0313	0.000494	-0.05961	0.002485	0.06505	3001	5000
Zv9_00028764 Zv9_00028765	1.33361	1.07386	12.5435	39.4775	14.3935	3.55216	2.38072	2.49438		pi.1[3978]	0.6703	0.2455	0.005117	0.08684	0.7166	0.9868	3001	5000		beta.i[3978]	0.0008347	0.03127	0.0004649	-0.05924	0.000779	0.06419	3001	5000
Zv9_00040903	84.4934	29.6141	12.8823	6.25092	2.32826	7.90267	9.04975	7.98358		pi.1[5671]	0.4472	0.1614	0.002425	0.08688	0.4614	0.7232	3001	5000		beta.i[5671]	0.003654	0.03165	0.0004613	-0.05738	0.002851	0.06563	3001	5000
Zv9_00013544	7.42719	1.0403	203.822	48.9188	13.9307	1.91996	1.21888	1.08126		pi.1[1890]	0.543	0.2088	0.003976	0.0872	0.5612	0.8846	3001	5000		beta.i[1890]	0.001641	0.03176	0.000543	-0.05967	0.001532	0.06423	3001	5000
Zv9_00014932	22.8823	19.8093	9.52318	2.86867	1.93543	7.5722	10.036	29.6507		pi.1[2070]	0.5256	0.1874	0.002785	0.08726	0.552	0.8155	3001	5000		beta.i[2070]	0.00321	0.03116	0.0004078	-0.05948	0.003648	0.06418	3001	5000
Zv9_00044969 Zv9_00044970	1.00232	1	1	1	1	18.9438	21.4486	31.9436		pi.1[6259]	0.7035	0.2478	0.004927	0.08737	0.7677	0.9904	3001	5000		beta.i[6259]	0.0008893	0.03164	0.0004582	-0.0612	0.0005036	0.06189	3001	5000
Zv9_00041307 Zv9_00041308	1.87199	1.91825	1.93207	2.32563	16.587	8.31676	5.54734	40.6423		pi.1[5728]	0.7102	0.2525	0.006187	0.08753	0.7771	0.9911	3001	5000		beta.i[5728]	0.0008041	0.03131	0.0004809	-0.06026	0.0004501	0.06143	3001	5000
Zv9_00028744 Zv9_00028741 Zv9_00028743 Zv9_00028747 Zv9_00028742 Zv9_00028746 Zv9_00028745	1	1.81614	1.23907	5.24028	36.6139	6.78398	8.53683	11.2601		pi.1[3973]	0.6939	0.247	0.005649	0.08768	0.7464	0.9916	3001	5000		beta.i[3973]	-0.0003211	0.03126	0.0004584	-0.06081	0.0001239	0.0606	3001	5000
Zv9_00010092	2.12559	1.00237	28.6349	35.6845	22.9594	1.75194	1.2858	1.13348		pi.1[1453]	0.6492	0.2423	0.004751	0.08771	0.69	0.9804	3001	5000		beta.i[1453]	0.0002461	0.03228	0.0005634	-0.06394	0.000211	0.06067	3001	5000
Zv9_00052915 Zv9_00052914	1.00818	1.0533	1.12713	1.06072	1.42445	21.9568	24.5025	16.9548		pi.1[7368]	0.6852	0.2486	0.005591	0.08783	0.7428	0.9884	3001	5000		beta.i[7368]	0.0003249	0.03167	0.0004417	-0.06002	0.0007	0.06254	3001	5000
Zv9_00050252 Zv9_00050249 Zv9_00050251 Zv9_00050250	2.1396	2.50243	1.09991	1.18937	4.94035	15.3705	18.7812	13.0418		pi.1[7012]	0.6943	0.248	0.005342	0.08787	0.7524	0.9911	3001	5000		beta.i[7012]	0.000573	0.03139	0.0004142	-0.06112	0.0006321	0.06381	3001	5000
Zv9_00048876 Zv9_00048881 Zv9_00048878 Zv9_00048880 Zv9_00048877	1.39957	3.17137	3.08371	1.83249	2.47393	10.2896	10.0994	45.7041		pi.1[6829]	0.73	0.2461	0.00601	0.08812	0.7977	0.9938	3001	5000		beta.i[6829]	0.001099	0.03158	0.0004775	-0.05927	0.001207	0.06416	3001	5000
Zv9_00052840	30.065	17.6728	5.81619	5.46161	11.4838	6.78907	7.7392	13.6588		pi.1[7360]	0.5078	0.1882	0.002824	0.08832	0.5339	0.8064	3001	5000		beta.i[7360]	0.002602	0.03121	0.000451	-0.05852	0.002294	0.06359	3001	5000
Zv9_00047504	29.1743	71.8008	25.5471	6.55531	1.33942	1.26465	1.15727	1.18035		pi.1[6627]	0.4923	0.1803	0.002444	0.08844	0.5139	0.7922	3001	5000		beta.i[6627]	0.002799	0.03181	0.0004534	-0.06036	0.003172	0.06574	3001	5000
Zv9_00001569 Zv9_00001570 Zv9_00001567 Zv9_00001568	1.66925	1.3356	1.25084	1.78557	11.7292	11.6115	13.8617	10.1915		pi.1[213]	0.689	0.2503	0.004862	0.08846	0.7486	0.9886	3001	5000		beta.i[213]	0.001167	0.03181	0.0004878	-0.06139	0.001838	0.06395	3001	5000
Zv9_00009242 Zv9_00009244 Zv9_00009241 Zv9_00009243	2.2775	1.4628	8.82884	17.2691	11.0321	5.16158	4.14629	3.11927		pi.1[1325]	0.6796	0.2465	0.00566	0.08853	0.7338	0.9879	3001	5000		beta.i[1325]	0.001531	0.03183	0.0005224	-0.05955	0.001142	0.06348	3001	5000
Zv9_00008130 Zv9_00008131	43.9244	39.9678	14.5795	7.01903	4.35672	3.02137	4.61514	3.71147		pi.1[1140]	0.4764	0.1758	0.003008	0.08854	0.4939	0.7631	3001	5000		beta.i[1140]	0.002592	0.03119	0.0004449	-0.05809	0.002382	0.06279	3001	5000
Zv9_00004577 Zv9_00004575 Zv9_00004579 Zv9_00004578	1.1307	1.16746	1.09617	2.16013	10.6883	10.7298	12.043	12.0065		pi.1[663]	0.7038	0.246	0.005977	0.08861	0.7614	0.9912	3001	5000		beta.i[663]	0.001094	0.03148	0.0005089	-0.06078	0.0009932	0.06247	3001	5000
Zv9_00041534 Zv9_00041536 Zv9_00041535	54.7932	17.3371	11.0877	5.28515	5.34756	8.63716	9.44513	8.82794		pi.1[5756]	0.4707	0.1728	0.002669	0.08872	0.487	0.7602	3001	5000		beta.i[5756]	0.002516	0.03206	0.000518	-0.05976	0.002691	0.06583	3001	5000
Zv9_00046239	14.3974	15.3128	16.2403	24.6091	6.76678	2.06526	1.60801	1.20586		pi.1[6445]	0.5361	0.1967	0.00335	0.08873	0.5624	0.8395	3001	5000		beta.i[6445]	0.001891	0.0319	0.0004894	-0.06032	0.002408	0.06484	3001	5000
Zv9_00048402 Zv9_00048404 Zv9_00048403	1.2919	1.25576	1.80032	2.29202	2.69789	6.8006	7.57957	114.62		pi.1[6758]	0.7337	0.252	0.006414	0.08878	0.8071	0.9932	3001	5000		beta.i[6758]	0.001087	0.0318	0.00051	-0.06127	0.001037	0.06123	3001	5000
Zv9_00014870	2.16767	1.95727	2.12972	3.50434	16.0184	9.03938	7.05485	14.0343		pi.1[2058]	0.7041	0.2454	0.005578	0.08892	0.7678	0.9897	3001	5000		beta.i[2058]	0.0004312	0.0314	0.0004775	-0.06012	0.0001327	0.06255	3001	5000
Zv9_00015621 Zv9_00015622	1.06813	1.02201	1.04479	1.01424	1.26679	29.539	22.2666	23.4555		pi.1[2160]	0.696	0.2447	0.00553	0.08917	0.7552	0.9888	3001	5000		beta.i[2160]	0.001072	0.032	0.0004841	-0.06117	0.0001584	0.06265	3001	5000
Zv9_00028758 Zv9_00028756 Zv9_00028757	1	1	1	1.0163	1.87944	40.5714	20.6516	16.43		pi.1[3976]	0.6867	0.2468	0.00535	0.08921	0.7457	0.9877	3001	5000		beta.i[3976]	0.0007123	0.03105	0.0004185	-0.06082	0.0007141	0.062	3001	5000
Zv9_00022957 Zv9_00022956 Zv9_00022958	20.7341	16.8999	21.4752	5.00261	2.66151	5.46706	6.12719	9.95298		pi.1[3191]	0.5209	0.1913	0.003029	0.08933	0.5469	0.812	3001	5000		beta.i[3191]	0.001718	0.03196	0.0004505	-0.06158	0.001454	0.06518	3001	5000
Zv9_00018892	22.2292	17.79	11.2583	7.49768	7.8276	4.50211	5.05535	3.91123		pi.1[2623]	0.5123	0.1906	0.003156	0.08939	0.5333	0.8192	3001	5000		beta.i[2623]	0.001661	0.03213	0.0004621	-0.06112	0.001311	0.06496	3001	5000
Zv9_00003668 Zv9_00003663 Zv9_00003662 Zv9_00003672 Zv9_00003660 Zv9_00003670 Zv9_00003665 Zv9_00003661 Zv9_00003666 Zv9_00003673 Zv9_00003667 Zv9_00003671 Zv9_00003669 Zv9_00003664	45.4785	27.771	34.7199	11.8347	8.61469	1	1	1		pi.1[525]	0.472	0.1744	0.002235	0.08961	0.4898	0.7602	3001	5000		beta.i[525]	0.002642	0.03175	0.000505	-0.05768	0.001978	0.06535	3001	5000
Zv9_00008095 Zv9_00008094 Zv9_00008093	25.2095	19.1573	10.7384	14.3551	6.73856	3.40086	3.88572	3.47067		pi.1[1133]	0.5046	0.1861	0.002988	0.08964	0.5254	0.7991	3001	5000		beta.i[1133]	0.002277	0.0318	0.0004806	-0.05942	0.001915	0.06337	3001	5000
Zv9_00004958 Zv9_00004957 Zv9_00004956	2.31838	1.84489	3.07675	2.52194	1.57991	22.446	16.5263	21.3526		pi.1[716]	0.7017	0.2448	0.00559	0.08976	0.7626	0.9885	3001	5000		beta.i[716]	0.001387	0.03098	0.0004178	-0.06056	0.001832	0.0617	3001	5000
Zv9_00044876 Zv9_00044874 Zv9_00044873 Zv9_00044875	1.0814	1.05389	1.21044	1.28161	1.4402	17.5644	27.5016	18.813		pi.1[6239]	0.7056	0.2456	0.005273	0.08977	0.767	0.9933	3001	5000		beta.i[6239]	0.0001567	0.03097	0.0005401	-0.06005	0.0002999	0.06059	3001	5000
Zv9_00023831 Zv9_00023834 Zv9_00023832 Zv9_00023833	1.0989	1.14807	1.37567	2.10314	2.3954	12.495	21.7462	18.6608		pi.1[3310]	0.7128	0.2468	0.005539	0.0899	0.7784	0.9927	3001	5000		beta.i[3310]	0.0002718	0.03129	0.0004852	-0.0622	0.0007841	0.0596	3001	5000
Zv9_00045292 Zv9_00045291	118.173	28.4953	8.51785	15.5854	4.83153	6.55401	5.16116	7.78313		pi.1[6310]	0.4276	0.1594	0.002427	0.09005	0.4411	0.6988	3001	5000		beta.i[6310]	0.003212	0.03171	0.0005505	-0.05866	0.003156	0.06559	3001	5000
Zv9_00005330 Zv9_00005329 Zv9_00005332 Zv9_00005331	16.649	5.85921	7.56951	6.78701	4.97872	5.4977	7.84156	44.1677		pi.1[773]	0.5457	0.2003	0.00342	0.09018	0.5737	0.851	3001	5000		beta.i[773]	0.002285	0.03141	0.0005442	-0.06225	0.002203	0.06263	3001	5000
Zv9_00052650 Zv9_00052652 Zv9_00052651	2.05854	1.04671	44.2968	103.277	7.2113	1.441	1.18011	1.51		pi.1[7338]	0.6328	0.2421	0.004715	0.09028	0.6684	0.9791	3001	5000		beta.i[7338]	0.0006537	0.03094	0.0004356	-0.05877	0.0004667	0.06177	3001	5000
Zv9_00045381	1	1	1.00864	1.00764	2.92356	9.03276	18.0004	29.3706		pi.1[6327]	0.7066	0.2505	0.005526	0.09063	0.7693	0.9918	3001	5000		beta.i[6327]	0.0005853	0.03151	0.0005613	-0.06159	0.0001462	0.06327	3001	5000
Zv9_00017073 Zv9_00017067 Zv9_00017072 Zv9_00017064 Zv9_00017074 Zv9_00017071 Zv9_00017065 Zv9_00017063 Zv9_00017069 Zv9_00017070 Zv9_00017066 Zv9_00017068	1	1	1	1	1	26.6308	24.3264	24.8875		pi.1[2373]	0.6988	0.2499	0.00667	0.09073	0.759	0.992	3001	5000		beta.i[2373]	-1.031e-05	0.03166	0.0005435	-0.06249	-0.0001927	0.06216	3001	5000
Zv9_00005338 Zv9_00005336 Zv9_00005339 Zv9_00005337	3.05076	4.45833	11.4522	18.8882	6.34758	4.40792	3.02899	3.10163		pi.1[774]	0.6695	0.2419	0.00465	0.0908	0.7231	0.9781	3001	5000		beta.i[774]	0.0008889	0.03207	0.0005848	-0.06195	0.001128	0.06221	3001	5000
Zv9_00031693	1.04156	1.02164	1.19642	23.3236	74.7148	4.63868	2.95696	8.35495		pi.1[4402]	0.6571	0.246	0.004725	0.09096	0.6962	0.9861	3001	5000		beta.i[4402]	0.0003103	0.03132	0.0005527	-0.06082	0.0002929	0.06122	3001	5000
Zv9_00026613 Zv9_00026615 Zv9_00026614	35.1632	27.9236	25.2407	13.2295	2.21766	4.9899	4.25194	2.52656		pi.1[3673]	0.4886	0.1812	0.002835	0.09099	0.5072	0.7808	3001	5000		beta.i[3673]	0.002292	0.03142	0.0004546	-0.05911	0.002054	0.06407	3001	5000
Zv9_00042622 Zv9_00042620	184.587	133.446	8.92406	3.96114	3.34223	5.65532	4.87344	2.61405		pi.1[5892]	0.4084	0.149	0.002514	0.09107	0.4186	0.671	3001	5000		beta.i[5892]	0.003206	0.0319	0.0006227	-0.05868	0.003433	0.06445	3001	5000
Zv9_00021832	14.7794	13.894	30.8105	30.6013	3.36771	1.12054	1.13811	1		pi.1[3034]	0.5305	0.1978	0.003541	0.0911	0.5513	0.8435	3001	5000		beta.i[3034]	0.001203	0.03141	0.0004755	-0.06155	0.00101	0.06317	3001	5000
Zv9_00014466 Zv9_00014468 Zv9_00014467	49.4107	9.12557	4.70003	4.65685	7.93045	16.0452	14.1284	12.2141		pi.1[2009]	0.4694	0.1747	0.002736	0.09114	0.4866	0.7552	3001	5000		beta.i[2009]	0.003514	0.03174	0.000392	-0.05901	0.003719	0.06409	3001	5000
Zv9_00041189 Zv9_00041188	2.17455	1.87945	2.75907	2.85722	8.35594	11.2944	12.1651	9.92588		pi.1[5711]	0.698	0.2497	0.005786	0.09114	0.7625	0.9923	3001	5000		beta.i[5711]	0.0004624	0.03099	0.000436	-0.06025	0.0003168	0.06091	3001	5000
Zv9_00054995	41.3437	25.6626	15.9138	5.07526	5.17198	5.13279	7.48054	6.25663		pi.1[7634]	0.4888	0.1738	0.002497	0.09133	0.5084	0.7719	3001	5000		beta.i[7634]	0.002446	0.03184	0.000511	-0.05923	0.002574	0.06361	3001	5000
Zv9_00014566 Zv9_00014565	6.01571	18.2801	13.4204	8.63593	3.01246	4.61023	4.43527	3.96452		pi.1[2020]	0.604	0.2199	0.004044	0.09141	0.6362	0.9204	3001	5000		beta.i[2020]	0.002585	0.03135	0.0004731	-0.05897	0.002659	0.06443	3001	5000
Zv9_00042370 Zv9_00042369	1.15976	1.14156	1.24936	1.25545	2.98933	17.615	18.0179	14.3369		pi.1[5871]	0.7017	0.2482	0.005862	0.0915	0.7608	0.9924	3001	5000		beta.i[5871]	0.001206	0.0319	0.000444	-0.06301	0.001601	0.06226	3001	5000
Zv9_00042570	1	1	1	1.03008	1.07731	4.11703	15.6516	93.3279		pi.1[5889]	0.7214	0.2524	0.005833	0.09169	0.79	0.9947	3001	5000		beta.i[5889]	-0.0004186	0.03162	0.0004486	-0.06298	-0.0001196	0.06261	3001	5000
Zv9_00030997 Zv9_00030994 Zv9_00030998 Zv9_00030993 Zv9_00030995	33.7969	15.3688	22.9461	9.28178	5.04865	4.57973	3.8323	5.37827		pi.1[4287]	0.4849	0.1824	0.002846	0.09172	0.5021	0.7812	3001	5000		beta.i[4287]	0.003032	0.03174	0.000478	-0.06095	0.002883	0.06567	3001	5000
Zv9_00008488	62.6221	37.7536	9.49695	2.71712	4.28172	7.14934	7.73579	7.7374		pi.1[1184]	0.4581	0.1694	0.002766	0.09176	0.4707	0.7428	3001	5000		beta.i[1184]	0.002996	0.03211	0.0005086	-0.05914	0.003145	0.06617	3001	5000
Zv9_00035199 Zv9_00035198 Zv9_00035196 Zv9_00035194 Zv9_00035195 Zv9_00035200 Zv9_00035197	2.96349	2.42496	42.1874	39.0168	3.66432	2.54075	2.25237	2.68975		pi.1[4888]	0.6402	0.237	0.004359	0.09176	0.6777	0.9735	3001	5000		beta.i[4888]	0.0009293	0.03167	0.0004958	-0.06061	0.0004793	0.06478	3001	5000
Zv9_00053907	1	1	1.12215	1.59128	1.28434	13.4492	29.4235	22.7645		pi.1[7507]	0.7013	0.2465	0.005425	0.09176	0.7599	0.9914	3001	5000		beta.i[7507]	0.0009287	0.03186	0.000469	-0.06138	0.001295	0.06376	3001	5000
Zv9_00036721 Zv9_00036722	46.2018	11.6979	4.66915	4.61253	18.3331	9.65484	9.0711	16.5296		pi.1[5095]	0.4768	0.1803	0.00286	0.09202	0.4988	0.7719	3001	5000		beta.i[5095]	0.002682	0.03146	0.0005186	-0.0594	0.003046	0.06321	3001	5000
Zv9_00003414	9.39087	6.78866	18.4142	20.5258	5.93261	3.32714	2.12809	4.22566		pi.1[493]	0.562	0.2103	0.003543	0.09208	0.5901	0.8851	3001	5000		beta.i[493]	0.001853	0.03121	0.000499	-0.06057	0.001646	0.06213	3001	5000
Zv9_00018780	1.06517	1	2.72526	4.22622	6.29869	7.10359	9.29573	15.7246		pi.1[2613]	0.7081	0.2504	0.005402	0.09213	0.7762	0.9927	3001	5000		beta.i[2613]	0.0006471	0.03155	0.0004602	-0.06189	0.0002639	0.06349	3001	5000
Zv9_00007893	43.7806	7.50277	8.98308	5.08005	9.74915	13.7429	11.332	5.69813		pi.1[1107]	0.469	0.1809	0.002754	0.09215	0.4871	0.7638	3001	5000		beta.i[1107]	0.002419	0.03171	0.0005473	-0.06042	0.002789	0.06381	3001	5000
Zv9_00049858 Zv9_00049859 Zv9_00049862	26.2716	12.604	24.0617	12.6948	3.84356	2.97708	4.30622	11.6349		pi.1[6948]	0.5102	0.1856	0.003165	0.09226	0.5335	0.8057	3001	5000		beta.i[6948]	0.002926	0.03145	0.0004658	-0.06101	0.003299	0.06388	3001	5000
Zv9_00054737 Zv9_00054734 Zv9_00054735 Zv9_00054733 Zv9_00054736	2.61922	1.34054	46.9453	26.613	4.51987	1	7.88506	14.6304		pi.1[7597]	0.654	0.2445	0.005073	0.09244	0.6978	0.9826	3001	5000		beta.i[7597]	0.001188	0.03115	0.0004509	-0.06007	0.001142	0.06188	3001	5000
Zv9_00046282 Zv9_00046281	16.3	7.51353	4.03647	2.25262	10.7024	11.6844	11.1866	31.7877		pi.1[6451]	0.552	0.1985	0.003316	0.09252	0.5817	0.8461	3001	5000		beta.i[6451]	0.002351	0.03124	0.0005462	-0.05857	0.002336	0.06388	3001	5000
Zv9_00025728 Zv9_00025726 Zv9_00025727 Zv9_00025729 Zv9_00025730	71.5204	26.6022	9.7416	5.78348	2.56685	10.0731	10.2373	11.1199		pi.1[3557]	0.4546	0.1659	0.002408	0.09264	0.468	0.7345	3001	5000		beta.i[3557]	0.003288	0.03141	0.0005977	-0.05858	0.003551	0.06417	3001	5000
Zv9_00021265 Zv9_00021264	1.94772	1.41921	1.85264	2.71078	10.6562	26.6655	14.5118	3.76173		pi.1[2963]	0.6911	0.2453	0.005307	0.0927	0.7509	0.9874	3001	5000		beta.i[2963]	0.0008807	0.03143	0.0004413	-0.0605	0.0007097	0.06162	3001	5000
Zv9_00032083 Zv9_00032078 Zv9_00032080 Zv9_00032081 Zv9_00032077 Zv9_00032075 Zv9_00032076 Zv9_00032082 Zv9_00032079	2.17779	1.6456	1.74786	3.10479	9.55338	12.3122	12.0277	9.81411		pi.1[4463]	0.7064	0.2458	0.005312	0.09289	0.77	0.9901	3001	5000		beta.i[4463]	0.0009299	0.03162	0.0004747	-0.06069	0.001708	0.06113	3001	5000
Zv9_00013959 Zv9_00013958	1	1	2.7643	26.2868	23.083	6.82536	4.37982	2.6967		pi.1[1941]	0.6804	0.2406	0.005351	0.0931	0.7323	0.9886	3001	5000		beta.i[1941]	-0.0002065	0.03182	0.0004776	-0.06115	-0.0004666	0.06291	3001	5000
Zv9_00010571 Zv9_00010572	20.5054	20.0947	19.1548	12.1239	2.94514	3.5773	3.34811	3.73183		pi.1[1525]	0.5154	0.189	0.002871	0.09329	0.5367	0.816	3001	5000		beta.i[1525]	0.002684	0.03213	0.0004957	-0.06054	0.00313	0.0633	3001	5000
Zv9_00034877 Zv9_00034879 Zv9_00034878 Zv9_00034876	37.9394	16.9865	14.5755	11.1336	2.2231	5.16533	10.7934	16.791		pi.1[4842]	0.5021	0.1792	0.002821	0.09336	0.5253	0.7841	3001	5000		beta.i[4842]	0.003669	0.0316	0.0004965	-0.05799	0.004123	0.06623	3001	5000
Zv9_00029603	79.2987	31.6534	6.18005	2.18778	8.34141	11.8713	13.737	13.1075		pi.1[4097]	0.4559	0.165	0.002909	0.09368	0.4707	0.7365	3001	5000		beta.i[4097]	0.003254	0.0314	0.0004612	-0.05862	0.003037	0.06576	3001	5000
Zv9_00034749	1.00029	1	1.00429	1.01385	9.92078	11.6546	10.4907	38.7039		pi.1[4829]	0.7221	0.2403	0.006101	0.09386	0.7812	0.9921	3001	5000		beta.i[4829]	0.001196	0.03137	0.0004903	-0.06096	0.0007566	0.06346	3001	5000
Zv9_00038241 Zv9_00038243 Zv9_00038244 Zv9_00038240 Zv9_00038242 Zv9_00038245 Zv9_00038248 Zv9_00038247 Zv9_00038246	5.0804	6.40209	2.19572	1.33662	6.86617	18.5979	10.5748	14.8772		pi.1[5320]	0.623	0.2303	0.004513	0.09391	0.6648	0.9479	3001	5000		beta.i[5320]	0.002126	0.0316	0.0004413	-0.0586	0.001734	0.06486	3001	5000
Zv9_00025984 Zv9_00025983	1.0442	1.10331	1.08399	1.22613	4.07726	19.1487	15.9537	16.6339		pi.1[3593]	0.7005	0.2462	0.006255	0.09393	0.7579	0.9899	3001	5000		beta.i[3593]	0.0004891	0.03151	0.0004623	-0.0614	0.0003206	0.06138	3001	5000
Zv9_00036665 Zv9_00036663 Zv9_00036664 Zv9_00036666	1.07049	1	1	1.02307	1.32398	10.2753	19.7476	52.0716		pi.1[5087]	0.7251	0.2428	0.005146	0.09403	0.7898	0.9926	3001	5000		beta.i[5087]	0.0001852	0.03151	0.0004704	-0.05911	0.0005718	0.06146	3001	5000
Zv9_00056324	520.321	99.8529	10.8225	10.8368	5.7579	3.81844	3.48614	1.62212		pi.1[7805]	0.3776	0.1375	0.002055	0.09429	0.3847	0.6206	3001	5000		beta.i[7805]	0.003428	0.0319	0.0006501	-0.05923	0.003073	0.06512	3001	5000
Zv9_00006721	10.3117	10.6253	16.8326	23.2762	8.4493	1.94324	1.38494	1.13774		pi.1[938]	0.5606	0.203	0.003187	0.09435	0.5886	0.8708	3001	5000		beta.i[938]	0.002096	0.0314	0.0004221	-0.05855	0.001679	0.06331	3001	5000
Zv9_00029191 Zv9_00029192	33.6309	8.88567	8.23227	11.0134	11.6383	8.60874	7.74473	9.09029		pi.1[4027]	0.5037	0.1787	0.003011	0.09457	0.5244	0.7914	3001	5000		beta.i[4027]	0.003906	0.03165	0.0005618	-0.05924	0.003825	0.06661	3001	5000
Zv9_00042879 Zv9_00042880	1	1	1	1	19.8096	51.0469	60.1567	1		pi.1[5928]	0.6352	0.2445	0.00491	0.09466	0.6663	0.9844	3001	5000		beta.i[5928]	0.0001723	0.03129	0.0005576	-0.06167	0.0001063	0.06124	3001	5000
Zv9_00020378 Zv9_00020376 Zv9_00020377	2.33188	1	42.2993	32.509	11.0716	4.01922	2.00613	1.44328		pi.1[2840]	0.6652	0.239	0.004736	0.09497	0.7091	0.9854	3001	5000		beta.i[2840]	0.001266	0.03204	0.0004848	-0.06134	0.0013	0.0637	3001	5000
Zv9_00048873	1	1.0048	1.00384	1.40577	5.06326	20.4221	36.5868	5.08648		pi.1[6828]	0.6786	0.245	0.004942	0.09499	0.7273	0.9896	3001	5000		beta.i[6828]	0.0001441	0.03171	0.00048	-0.06239	0.0004334	0.06077	3001	5000
Zv9_00030524	2.58673	1.03664	48.1367	41.4407	24.0101	2.05252	1.20443	1.12328		pi.1[4223]	0.6497	0.236	0.004935	0.09502	0.6836	0.9828	3001	5000		beta.i[4223]	0.002118	0.0313	0.000483	-0.05923	0.001835	0.06204	3001	5000
Zv9_00037389 Zv9_00037390	12.2934	15.9774	24.8141	6.45099	12.1287	2.614	2.23153	1.72565		pi.1[5189]	0.5434	0.2027	0.002987	0.0951	0.5678	0.8583	3001	5000		beta.i[5189]	0.001613	0.0317	0.0004447	-0.06184	0.002127	0.06186	3001	5000
Zv9_00057654	1.50274	2.34563	8.84971	22.0989	11.3893	4.41824	3.59961	2.42197		pi.1[8013]	0.6944	0.2447	0.00579	0.09517	0.7569	0.9886	3001	5000		beta.i[8013]	0.0008901	0.03167	0.0004601	-0.06018	0.0009248	0.06275	3001	5000
Zv9_00016597 Zv9_00016594 Zv9_00016598 Zv9_00016595 Zv9_00016593	9.86642	6.35273	4.95985	6.82729	7.1665	5.08652	9.69573	25.2528		pi.1[2301]	0.5878	0.2105	0.003862	0.0953	0.6248	0.8884	3001	5000		beta.i[2301]	0.001589	0.03169	0.0003806	-0.06035	0.001595	0.06307	3001	5000
Zv9_00056853 Zv9_00056854 Zv9_00056855 Zv9_00056856	1.05609	1.03578	2.4351	1.69281	47.6602	9.25498	14.1535	11.2708		pi.1[7872]	0.6794	0.2475	0.004897	0.09537	0.7267	0.9889	3001	5000		beta.i[7872]	0.001066	0.03099	0.000477	-0.05986	0.0009675	0.06178	3001	5000
Zv9_00032886 Zv9_00032887 Zv9_00032885	26.1643	17.7499	9.84771	15.795	8.53477	5.54581	4.12301	3.33775		pi.1[4556]	0.5126	0.1854	0.003218	0.0954	0.5344	0.7983	3001	5000		beta.i[4556]	0.001749	0.03161	0.0004807	-0.06069	0.00135	0.06488	3001	5000
Zv9_00025132 Zv9_00025131	44.0816	16.3746	26.6196	23.6351	2.9267	3.66358	3.29042	3.82093		pi.1[3472]	0.4758	0.1732	0.002567	0.09542	0.4937	0.7602	3001	5000		beta.i[3472]	0.001674	0.03109	0.0004888	-0.05887	0.00123	0.06275	3001	5000
Zv9_00034161	21.1103	16.4048	46.1651	45.6517	1.45779	1.5655	1.36806	5.5739		pi.1[4754]	0.508	0.1833	0.003192	0.09557	0.5314	0.8038	3001	5000		beta.i[4754]	0.002468	0.03086	0.0004969	-0.05755	0.002345	0.06175	3001	5000
Zv9_00051904	1	1	1	1	1.54338	58.1745	82.7933	3.98972		pi.1[7228]	0.6371	0.2435	0.003831	0.09578	0.673	0.9801	3001	5000		beta.i[7228]	0.0003931	0.03142	0.0004951	-0.061	0.0009783	0.06173	3001	5000
Zv9_00030755 Zv9_00030754 Zv9_00030753	45.3876	17.1469	10.1609	3.93848	13.9881	10.0093	8.08423	4.95405		pi.1[4250]	0.4779	0.171	0.00267	0.09579	0.4985	0.7622	3001	5000		beta.i[4250]	0.00339	0.03172	0.000499	-0.05899	0.003846	0.064	3001	5000
Zv9_00040210	78.9874	35.4377	10.8871	8.14238	11.79	4.84472	3.05784	3.33123		pi.1[5576]	0.4515	0.1622	0.002373	0.09584	0.4637	0.7288	3001	5000		beta.i[5576]	0.003274	0.03195	0.0005272	-0.0599	0.003192	0.06672	3001	5000
Zv9_00041717	86.0664	30.4783	19.0451	6.3029	2.53611	6.06524	4.56119	13.6802		pi.1[5785]	0.4464	0.1658	0.002196	0.09592	0.4572	0.7276	3001	5000		beta.i[5785]	0.003586	0.0316	0.0005042	-0.05905	0.003684	0.06623	3001	5000
Zv9_00014387 Zv9_00014385 Zv9_00014390 Zv9_00014389 Zv9_00014386 Zv9_00014388	35.0543	8.81239	5.42829	6.55433	14.4223	9.14224	9.79652	14.2354		pi.1[2000]	0.499	0.1801	0.002845	0.09593	0.5195	0.7903	3001	5000		beta.i[2000]	0.00251	0.03197	0.0004895	-0.06198	0.002406	0.06636	3001	5000
Zv9_00002765	1	1	1	100.8	54.3849	4.74483	2.29342	2.88302		pi.1[393]	0.6252	0.2459	0.004738	0.09595	0.6556	0.9842	3001	5000		beta.i[393]	0.001084	0.0313	0.000466	-0.06069	0.001698	0.0619	3001	5000
Zv9_00041691 Zv9_00041695 Zv9_00041693 Zv9_00041694 Zv9_00041692	42.8846	10.2254	8.58193	13.2002	18.1559	9.09971	6.87392	3.21987		pi.1[5780]	0.4882	0.1733	0.002949	0.09606	0.5078	0.7694	3001	5000		beta.i[5780]	0.002925	0.03198	0.0003967	-0.06071	0.003176	0.06573	3001	5000
Zv9_00002474	1.22183	1.17063	2.4258	4.19485	14.1469	10.2916	11.7953	5.82046		pi.1[363]	0.7038	0.2478	0.006593	0.09617	0.7633	0.9901	3001	5000		beta.i[363]	0.0005199	0.03219	0.0004246	-0.0634	7.706e-05	0.06347	3001	5000
Zv9_00028678	1	1.00612	1.00001	1.00963	6.09695	15.2415	19.1268	12.0722		pi.1[3961]	0.6954	0.2461	0.00465	0.09628	0.7553	0.9903	3001	5000		beta.i[3961]	-0.0002585	0.03173	0.0005523	-0.06237	-0.0003193	0.06035	3001	5000
Zv9_00055348 Zv9_00055349	3.2971	2.43766	2.7428	3.68067	3.34885	11.7738	12.063	37.8454		pi.1[7680]	0.7151	0.2391	0.004849	0.09679	0.7779	0.9877	3001	5000		beta.i[7680]	0.001038	0.0315	0.0004801	-0.06086	0.001184	0.06283	3001	5000
Zv9_00002440 Zv9_00002438 Zv9_00002441 Zv9_00002439	1.0393	1.03824	1.03582	1.01846	1.37526	22.7136	19.3391	25.8946		pi.1[357]	0.6952	0.2499	0.0049	0.09689	0.7576	0.9918	3001	5000		beta.i[357]	0.0008998	0.03209	0.0004828	-0.06076	0.001118	0.06553	3001	5000
Zv9_00041094	1.17543	1.39664	1.25212	2.25056	2.2417	19.3647	20.1117	17.4096		pi.1[5697]	0.7098	0.2481	0.006509	0.09691	0.7742	0.9925	3001	5000		beta.i[5697]	0.0002141	0.03198	0.0005382	-0.06408	0.0009222	0.06353	3001	5000
Zv9_00001084 Zv9_00001085	34.8655	28.5678	32.6151	15.2059	3.19757	1.77931	1	1		pi.1[161]	0.4869	0.1745	0.002545	0.09707	0.5055	0.776	3001	5000		beta.i[161]	0.001871	0.03192	0.0005292	-0.0604	0.001687	0.0653	3001	5000
Zv9_00040160 Zv9_00040161	3.07841	4.81897	8.00486	10.2542	2.47963	6.75261	6.69279	22.2358		pi.1[5570]	0.6939	0.2361	0.005709	0.09717	0.7491	0.9843	3001	5000		beta.i[5570]	0.0009515	0.03199	0.0005152	-0.06215	0.0009831	0.06556	3001	5000
Zv9_00014820 Zv9_00014818 Zv9_00014819	91.2996	38.0694	9.66257	3.99433	5.92363	5.66315	6.98624	33.5336		pi.1[2047]	0.4576	0.1642	0.002736	0.09723	0.4729	0.7309	3001	5000		beta.i[2047]	0.003017	0.03198	0.0005345	-0.05851	0.003036	0.06608	3001	5000
Zv9_00046609	1	1	1.01962	1.48545	11.5695	24.3864	14.5513	5.12282		pi.1[6493]	0.6785	0.2485	0.004995	0.0974	0.7298	0.9904	3001	5000		beta.i[6493]	0.0002152	0.03176	0.0004702	-0.0629	-7.65e-05	0.06259	3001	5000
Zv9_00032659	56.1125	10.4363	7.36243	10.1833	9.27731	8.09699	10.6822	15.1552		pi.1[4526]	0.4763	0.1679	0.003	0.0975	0.494	0.7511	3001	5000		beta.i[4526]	0.003893	0.03133	0.0005081	-0.05567	0.003565	0.06425	3001	5000
Zv9_00021812 Zv9_00021811	3.07214	2.29003	2.82943	2.48419	3.36213	11.2695	12.9758	22.2024		pi.1[3030]	0.6951	0.2448	0.00532	0.09756	0.7581	0.987	3001	5000		beta.i[3030]	0.001216	0.03119	0.0004901	-0.05982	0.001793	0.06384	3001	5000
Zv9_00044186	1.00211	1.00102	1.06015	1.00569	1.06238	9.78777	21.2402	47.3864		pi.1[6127]	0.7223	0.2466	0.006208	0.09768	0.7848	0.9923	3001	5000		beta.i[6127]	-0.0006102	0.03184	0.0005586	-0.06236	-0.000684	0.06291	3001	5000
Zv9_00039319 Zv9_00039321 Zv9_00039317 Zv9_00039320 Zv9_00039323 Zv9_00039318	94.5952	31.8033	1	12.3266	14.2779	15.1006	13.237	18.5654		pi.1[5461]	0.4457	0.163	0.002679	0.09777	0.4577	0.7264	3001	5000		beta.i[5461]	0.003809	0.03147	0.0005529	-0.05731	0.004082	0.06614	3001	5000
Zv9_00013261 Zv9_00013262	55.1056	39.0043	12.0537	7.88744	6.58863	5.69247	5.10579	2.10071		pi.1[1857]	0.4738	0.1683	0.002349	0.09778	0.4918	0.752	3001	5000		beta.i[1857]	0.002092	0.03109	0.0004734	-0.05848	0.001781	0.06327	3001	5000
Zv9_00020798 Zv9_00020797	31.1606	21.5715	9.63725	11.2301	4.05311	5.2721	6.48113	6.62936		pi.1[2899]	0.5002	0.1761	0.00262	0.09787	0.5205	0.7838	3001	5000		beta.i[2899]	0.003122	0.03186	0.0004333	-0.05846	0.003351	0.06563	3001	5000
Zv9_00005790 Zv9_00005791 Zv9_00005788 Zv9_00005793 Zv9_00005789 Zv9_00005792	6.50088	6.16615	7.47223	17.8207	2.20732	2.75905	5.7712	77.0715		pi.1[826]	0.628	0.2183	0.003416	0.09796	0.6745	0.9234	3001	5000		beta.i[826]	0.001974	0.03118	0.0005145	-0.05742	0.001768	0.06413	3001	5000
Zv9_00025570	732.798	55.3339	43.7388	28.3636	4.03712	1.34982	1.05655	1.06823		pi.1[3531]	0.3781	0.1309	0.001567	0.09807	0.3868	0.6138	3001	5000		beta.i[3531]	0.00484	0.03081	0.0007296	-0.0557	0.005008	0.06519	3001	5000
Zv9_00014281 Zv9_00014282	8.57082	26.194	11.1348	4.49437	2.12964	5.59	6.68132	12.5528		pi.1[1980]	0.5899	0.2076	0.003726	0.09843	0.622	0.8928	3001	5000		beta.i[1980]	0.002361	0.03144	0.0004238	-0.06015	0.002434	0.06304	3001	5000
Zv9_00030267 Zv9_00030268 Zv9_00030266	3.6211	5.72218	5.97061	3.26332	18.9504	8.95835	7.25668	4.45872		pi.1[4184]	0.6524	0.2403	0.005027	0.09882	0.6991	0.9724	3001	5000		beta.i[4184]	0.0008807	0.0317	0.0004444	-0.06088	0.0006399	0.06346	3001	5000
Zv9_00013324 Zv9_00013322 Zv9_00013325 Zv9_00013323	13.5385	5.10796	2.55894	4.43123	6.36758	11.0773	22.6906	13.4014		pi.1[1867]	0.5549	0.2009	0.003051	0.09895	0.5838	0.8626	3001	5000		beta.i[1867]	0.002506	0.03182	0.000453	-0.06088	0.002046	0.06457	3001	5000
Zv9_00045555 Zv9_00045558 Zv9_00045556 Zv9_00045554	1.80948	2.41723	5.10096	11.653	7.50335	3.79933	3.44744	53.4838		pi.1[6355]	0.7238	0.2477	0.006647	0.09902	0.7899	0.9934	3001	5000		beta.i[6355]	0.002216	0.03179	0.0004712	-0.05971	0.001601	0.06537	3001	5000
Zv9_00043893 Zv9_00043892 Zv9_00043891	27.8978	17.223	24.0685	20.8653	6.43515	1.58138	1.51626	2.71952		pi.1[6072]	0.503	0.1767	0.002831	0.09905	0.5228	0.7931	3001	5000		beta.i[6072]	0.003106	0.03178	0.0004738	-0.06062	0.00307	0.06471	3001	5000
Zv9_00044992 Zv9_00044994 Zv9_00044993 Zv9_00044991 Zv9_00044990	1.33751	1.24266	1.47341	3.01755	13.8314	8.20906	11.7037	8.98987		pi.1[6266]	0.7002	0.25	0.005652	0.09907	0.7627	0.9894	3001	5000		beta.i[6266]	0.0008577	0.03153	0.000574	-0.05993	0.0007684	0.06412	3001	5000
Zv9_00048504 Zv9_00048505 Zv9_00048503	32.005	14.0122	11.799	8.91063	9.627	6.01746	6.68819	5.05567		pi.1[6777]	0.5022	0.1797	0.003392	0.0991	0.5209	0.7911	3001	5000		beta.i[6777]	0.00215	0.03246	0.0005087	-0.06094	0.00123	0.06644	3001	5000
Zv9_00006397 Zv9_00006394 Zv9_00006392 Zv9_00006393 Zv9_00006391 Zv9_00006396	46.9304	1	14.3546	14.5835	23.8794	15.834	13.8049	12.6231		pi.1[895]	0.4726	0.1727	0.002702	0.09913	0.488	0.7593	3001	5000		beta.i[895]	0.003483	0.03171	0.0005423	-0.05875	0.003565	0.06536	3001	5000
Zv9_00024588 Zv9_00024595 Zv9_00024593 Zv9_00024596 Zv9_00024592 Zv9_00024591 Zv9_00024594 Zv9_00024587 Zv9_00024589 Zv9_00024590	1.08186	1.1313	2.70401	9.832	10.9448	6.25015	7.23296	16.4695		pi.1[3409]	0.7147	0.2409	0.005498	0.09925	0.7763	0.9924	3001	5000		beta.i[3409]	0.000681	0.0315	0.000452	-0.06036	0.000828	0.06228	3001	5000
Zv9_00008856	10.5212	1.03085	320.49	108.802	5.19983	1.68543	1.212	1		pi.1[1245]	0.5147	0.1903	0.00278	0.09934	0.531	0.8348	3001	5000		beta.i[1245]	0.001736	0.03184	0.0007157	-0.05987	0.001563	0.06461	3001	5000
Zv9_00001332 Zv9_00001331	1	1	1.06892	1.02672	2.7786	49.5908	21.213	7.19003		pi.1[182]	0.6627	0.2482	0.005247	0.09941	0.7098	0.9876	3001	5000		beta.i[182]	0.001355	0.03149	0.0004571	-0.05928	0.001379	0.06397	3001	5000
Zv9_00005380	1.18642	1.24066	1.9001	4.7165	4.05764	11.2599	12.4021	26.777		pi.1[776]	0.7311	0.2401	0.005594	0.09946	0.8005	0.9922	3001	5000		beta.i[776]	0.0009456	0.03141	0.0004579	-0.06231	0.001219	0.06264	3001	5000
Zv9_00026751 Zv9_00026749 Zv9_00026750 Zv9_00026748	4.8535	17.0205	19.8294	17.9345	1.18976	3.5576	3.35012	5.07188		pi.1[3685]	0.6119	0.225	0.004193	0.0995	0.6459	0.94	3001	5000		beta.i[3685]	0.00209	0.0322	0.0004768	-0.06143	0.002226	0.06375	3001	5000
Zv9_00057844	1.16529	1	7.47561	62.9555	70.2562	1.34207	1.0464	1		pi.1[8048]	0.6441	0.2408	0.004856	0.09952	0.6745	0.9832	3001	5000		beta.i[8048]	-0.0002475	0.03095	0.0005054	-0.06019	-0.0002576	0.06172	3001	5000
Zv9_00006127	1	1	1.08224	1.67369	6.71453	8.89946	22.5174	16.2313		pi.1[859]	0.7099	0.2462	0.005506	0.09957	0.7718	0.993	3001	5000		beta.i[859]	2.179e-05	0.0315	0.0004203	-0.06183	-0.0001618	0.06092	3001	5000
Zv9_00046170 Zv9_00046171	42.3539	24.3566	9.38197	4.50755	4.6783	10.4695	9.42226	9.82098		pi.1[6434]	0.4863	0.174	0.002979	0.0996	0.5031	0.7754	3001	5000		beta.i[6434]	0.002612	0.03144	0.0004716	-0.05873	0.00228	0.06501	3001	5000
Zv9_00054635 Zv9_00054630 Zv9_00054631 Zv9_00054634 Zv9_00054632 Zv9_00054637 Zv9_00054636	4.82147	20.5103	12.4353	3.99872	3.48329	5.92181	5.13798	9.89044		pi.1[7585]	0.6351	0.2223	0.004775	0.09982	0.6702	0.9465	3001	5000		beta.i[7585]	0.001853	0.03195	0.0004984	-0.0597	0.001547	0.06634	3001	5000
Zv9_00013597	63.9467	25.2905	14.6134	4.77968	7.46863	6.3381	6.33656	5.33996		pi.1[1898]	0.4599	0.1667	0.002273	0.09994	0.4733	0.7449	3001	5000		beta.i[1898]	0.002701	0.03214	0.0005506	-0.05813	0.002676	0.0673	3001	5000
Zv9_00022878 Zv9_00022879	1.04643	1.17298	1.34073	1.2515	24.4882	14.3176	15.4259	9.41012		pi.1[3179]	0.6965	0.2448	0.005724	0.09994	0.7558	0.9905	3001	5000		beta.i[3179]	0.0002664	0.03165	0.0004652	-0.06129	0.0003667	0.06131	3001	5000
Zv9_00010527	1.34533	1.14901	1.30591	1.28335	2.07548	10.8192	11.9808	69.2051		pi.1[1519]	0.7291	0.2455	0.005381	0.1	0.7977	0.9938	3001	5000		beta.i[1519]	0.0001472	0.03145	0.0004532	-0.06133	4.678e-05	0.06181	3001	5000
Zv9_00018804	1.03996	1.07872	1.13021	1.63179	45.7474	10.3416	10.7687	16.7857		pi.1[2615]	0.6861	0.2448	0.005569	0.1002	0.7384	0.9898	3001	5000		beta.i[2615]	-0.0001522	0.03195	0.0005483	-0.06372	-0.0002346	0.06422	3001	5000
Zv9_00050180	29.8332	11.6387	10.4696	11.0882	10.2875	5.79963	6.22648	6.29118		pi.1[6996]	0.5087	0.1811	0.002499	0.1002	0.5294	0.8007	3001	5000		beta.i[6996]	0.002122	0.03154	0.0004355	-0.06158	0.002656	0.06215	3001	5000
Zv9_00013369 Zv9_00013373 Zv9_00013372 Zv9_00013370 Zv9_00013374 Zv9_00013371	31.6761	18.5396	12.5897	5.24823	7.77513	6.4223	6.54813	7.41819		pi.1[1875]	0.5024	0.1791	0.002943	0.1004	0.5254	0.7956	3001	5000		beta.i[1875]	0.002741	0.03158	0.0004527	-0.05899	0.002808	0.06536	3001	5000
Zv9_00009250 Zv9_00009251 Zv9_00009255 Zv9_00009254	25.3558	19.3081	9.29293	7.11942	6.87964	6.43525	5.2755	6.12289		pi.1[1326]	0.5114	0.183	0.003205	0.1005	0.5301	0.8024	3001	5000		beta.i[1326]	0.002605	0.0316	0.0005198	-0.05918	0.002866	0.06485	3001	5000
Zv9_00047648 Zv9_00047649	1	1.01028	1.02056	1.04358	1.13258	13.1835	43.1329	20.4606		pi.1[6647]	0.697	0.2449	0.004863	0.1005	0.7502	0.9899	3001	5000		beta.i[6647]	0.0002797	0.03168	0.0004892	-0.06184	0.0005744	0.06214	3001	5000
Zv9_00030779 Zv9_00030781 Zv9_00030782 Zv9_00030780	36.9776	20.119	9.48897	7.74229	5.4816	6.21609	8.37874	7.90783		pi.1[4254]	0.4951	0.1765	0.0027	0.1008	0.5122	0.7835	3001	5000		beta.i[4254]	0.003126	0.03111	0.0004939	-0.0579	0.003071	0.0645	3001	5000
Zv9_00036093	2.35991	1	45.6134	35.6038	27.7315	1.41339	1.40884	1.37313		pi.1[5008]	0.6422	0.2401	0.004621	0.1008	0.6769	0.9821	3001	5000		beta.i[5008]	0.00101	0.03191	0.0004824	-0.06123	-0.0001081	0.06349	3001	5000
Zv9_00005258 Zv9_00005263 Zv9_00005261 Zv9_00005262 Zv9_00005257 Zv9_00005260 Zv9_00005259	1.14251	1.24524	3.74242	10.7785	11.3154	8.51475	5.57194	20.9932		pi.1[760]	0.7248	0.24	0.005441	0.1011	0.7913	0.992	3001	5000		beta.i[760]	0.0006212	0.03216	0.0005263	-0.06274	0.0009973	0.06335	3001	5000
Zv9_00019453 Zv9_00019454 Zv9_00019452 Zv9_00019451	1.83209	1.84757	1.75506	1	2.08659	29.9543	20.0046	19.5447		pi.1[2704]	0.7001	0.2449	0.00599	0.1012	0.7595	0.9907	3001	5000		beta.i[2704]	0.0003347	0.03178	0.0005251	-0.06168	-2.921e-05	0.06276	3001	5000
Zv9_00027692 Zv9_00027694 Zv9_00027693	1.0963	1.01217	4.94365	30.8926	18.8076	4.80107	5.375	3.97483		pi.1[3822]	0.6928	0.2427	0.005087	0.1012	0.7454	0.9913	3001	5000		beta.i[3822]	0.0003302	0.03197	0.000468	-0.06348	-0.0003991	0.06419	3001	5000
Zv9_00042312 Zv9_00042313 Zv9_00042311 Zv9_00042310	2.08218	2.27172	1.58645	1.45902	4.53954	12.4896	15.6566	17.4106		pi.1[5864]	0.7089	0.247	0.005655	0.1012	0.7747	0.9905	3001	5000		beta.i[5864]	0.0006299	0.03172	0.0004543	-0.06234	0.0004528	0.06396	3001	5000
Zv9_00027245 Zv9_00027246	20.1641	16.9968	18.386	11.4779	6.20023	4.44325	3.39393	3.92386		pi.1[3777]	0.5327	0.1867	0.003074	0.1013	0.556	0.8299	3001	5000		beta.i[3777]	0.002261	0.03142	0.0005106	-0.06004	0.002351	0.062	3001	5000
Zv9_00035783 Zv9_00035786 Zv9_00035785 Zv9_00035784	36.2216	26.8918	11.3816	5.15367	2.7011	8.18047	8.00363	11.6516		pi.1[4966]	0.4986	0.1786	0.002822	0.1013	0.5191	0.7808	3001	5000		beta.i[4966]	0.002965	0.03146	0.0005483	-0.05677	0.002323	0.06582	3001	5000
Zv9_00005741 Zv9_00005740 Zv9_00005739	1	1	1	1	5.16226	20.5843	19.8626	9.84668		pi.1[821]	0.6981	0.2399	0.004844	0.1015	0.7523	0.9912	3001	5000		beta.i[821]	0.0005046	0.03243	0.0005523	-0.06395	-0.0001607	0.06653	3001	5000
Zv9_00017312	5.98445	22.9271	12.5095	7.46219	5.51361	3.15564	3.47028	4.29933		pi.1[2403]	0.6045	0.2166	0.003855	0.1015	0.6368	0.919	3001	5000		beta.i[2403]	0.001765	0.03182	0.0005347	-0.05917	0.001252	0.06483	3001	5000
Zv9_00017619 Zv9_00017618	1	1	1	1.0054	2.06151	5.83539	12.7358	81.4943		pi.1[2450]	0.7306	0.2456	0.005682	0.1015	0.8012	0.9921	3001	5000		beta.i[2450]	0.0003446	0.03175	0.0004305	-0.06025	0.000392	0.0641	3001	5000
Zv9_00025868 Zv9_00025869 Zv9_00025866 Zv9_00025867	8.94136	4.18648	5.32404	1	10.0259	13.8396	26.5608	19.2277		pi.1[3576]	0.5932	0.2105	0.003946	0.1015	0.6226	0.899	3001	5000		beta.i[3576]	0.002443	0.03134	0.0004566	-0.05944	0.002495	0.06384	3001	5000
Zv9_00012097 Zv9_00012098	18.882	20.222	14.2958	8.0427	6.08362	4.65985	3.99174	3.85155		pi.1[1719]	0.5295	0.1893	0.002895	0.1016	0.5535	0.8169	3001	5000		beta.i[1719]	0.002193	0.03159	0.0005681	-0.05877	0.001916	0.06471	3001	5000
Zv9_00026134 Zv9_00026142 Zv9_00026132 Zv9_00026133 Zv9_00026139 Zv9_00026129 Zv9_00026147 Zv9_00026143 Zv9_00026138 Zv9_00026144 Zv9_00026145 Zv9_00026135 Zv9_00026140 Zv9_00026146 Zv9_00026141 Zv9_00026137 Zv9_00026148 Zv9_00026136 Zv9_00026149 Zv9_00026130 Zv9_00026131	1	2.57431	3.18388	1	65.1424	15.2658	12.3481	9.79228		pi.1[3612]	0.6757	0.2396	0.005364	0.1016	0.7225	0.9878	3001	5000		beta.i[3612]	0.001623	0.03135	0.0005394	-0.05976	0.001574	0.06373	3001	5000
Zv9_00041210 Zv9_00041211	5.04972	4.59977	6.14059	1.66997	5.59373	6.90884	8.89703	87.5014		pi.1[5715]	0.6692	0.2252	0.004661	0.1016	0.7185	0.9589	3001	5000		beta.i[5715]	0.001875	0.03186	0.0005229	-0.06033	0.001701	0.06369	3001	5000
Zv9_00018355	137.35	51.6659	48.6258	17.8612	1.41575	1.097	1.08362	1.0638		pi.1[2556]	0.4313	0.1519	0.00224	0.1019	0.4413	0.6978	3001	5000		beta.i[2556]	0.003099	0.03198	0.0005099	-0.05869	0.003369	0.06581	3001	5000
Zv9_00043023	2.43045	2.96936	6.60664	12.5978	14.3009	4.47676	4.14033	3.63402		pi.1[5947]	0.6824	0.2448	0.005306	0.102	0.7349	0.9866	3001	5000		beta.i[5947]	0.0007181	0.03107	0.0004267	-0.06024	0.0002385	0.06189	3001	5000
Zv9_00044319 Zv9_00044318	1.0123	1.00593	1.01616	1.02869	1.29923	7.61921	17.5377	64.513		pi.1[6147]	0.7349	0.2446	0.00585	0.102	0.8051	0.9946	3001	5000		beta.i[6147]	0.0009936	0.03155	0.0005207	-0.06031	0.0009395	0.06212	3001	5000
Zv9_00044655 Zv9_00044656	24.6634	22.9878	16.7308	10.1354	3.85535	5.18129	4.16299	5.19248		pi.1[6204]	0.5204	0.1803	0.002933	0.102	0.5384	0.8132	3001	5000		beta.i[6204]	0.002258	0.03198	0.0004906	-0.05926	0.001757	0.06528	3001	5000
Zv9_00054121	29.8496	10.2606	17.5944	22.6809	2.55698	7.51159	6.59618	5.60708		pi.1[7529]	0.4958	0.1786	0.002683	0.102	0.51	0.7898	3001	5000		beta.i[7529]	0.002205	0.03151	0.0004763	-0.0579	0.001651	0.06521	3001	5000
Zv9_00026192	1	1	1	1.05657	1.07043	3.18695	10.9612	220.116		pi.1[3619]	0.7429	0.2491	0.005578	0.1029	0.8232	0.9945	3001	5000		beta.i[3619]	0.0009895	0.03158	0.0005172	-0.06031	0.0007503	0.06404	3001	5000
Zv9_00018327 Zv9_00018328	1.65792	1.27059	3.85157	5.05883	3.09822	9.05205	11.9836	25.5044		pi.1[2545]	0.7241	0.2412	0.005581	0.1031	0.7926	0.9903	3001	5000		beta.i[2545]	0.001133	0.03164	0.0004872	-0.06173	0.001438	0.06233	3001	5000
Zv9_00033127 Zv9_00033128 Zv9_00033129	1.35235	1.10174	3.32553	7.40754	4.89197	8.46962	12.6665	14.0006		pi.1[4598]	0.7194	0.2429	0.004979	0.1033	0.7864	0.9908	3001	5000		beta.i[4598]	0.001113	0.03137	0.0005115	-0.05974	0.00109	0.06197	3001	5000
Zv9_00036750 Zv9_00036749	35.2736	39.0054	9.15899	7.63713	8.81974	5.4208	4.31334	2.43224		pi.1[5101]	0.4968	0.1745	0.002647	0.1033	0.5171	0.7761	3001	5000		beta.i[5101]	0.002014	0.03223	0.0005103	-0.06137	0.002618	0.06538	3001	5000
Zv9_00010050 Zv9_00010049	4.7722	17.1106	22.3668	11.8457	4.34559	2.49814	2.14263	2.42988		pi.1[1446]	0.632	0.2224	0.004346	0.1034	0.668	0.9482	3001	5000		beta.i[1446]	0.001947	0.0317	0.000494	-0.06018	0.001865	0.06309	3001	5000
Zv9_00014554 Zv9_00014557 Zv9_00014562 Zv9_00014560 Zv9_00014559 Zv9_00014553 Zv9_00014558 Zv9_00014561 Zv9_00014555 Zv9_00014563 Zv9_00014556	19.9601	17.2332	22.3303	7.33365	4.47178	8.67438	7.27648	1		pi.1[2019]	0.5194	0.1866	0.002903	0.1034	0.5447	0.8091	3001	5000		beta.i[2019]	0.00177	0.03152	0.0004647	-0.0593	0.001363	0.06365	3001	5000
Zv9_00008885	1	1.07557	57.005	36.8132	10.7693	3.84309	1	1		pi.1[1259]	0.6508	0.2418	0.004425	0.1037	0.6873	0.9828	3001	5000		beta.i[1259]	0.0007973	0.03171	0.0004535	-0.06287	0.0009767	0.06191	3001	5000
Zv9_00051143	15.3672	8.86698	20.8377	26.6024	11.1109	1.45189	1.64324	1.2748		pi.1[7133]	0.5237	0.19	0.003012	0.1038	0.544	0.8294	3001	5000		beta.i[7133]	0.001052	0.03156	0.0005332	-0.05978	0.001035	0.06255	3001	5000
Zv9_00033074	1	1	1	1	1	3.58789	23.5197	55.3066		pi.1[4585]	0.7144	0.2478	0.005427	0.1041	0.7766	0.9931	3001	5000		beta.i[4585]	0.0003603	0.03165	0.0004654	-0.06211	0.0004222	0.06283	3001	5000
Zv9_00052353	6.13417	11.0925	17.8817	18.0126	1.65579	1.84267	3.82479	26.3711		pi.1[7294]	0.6125	0.221	0.004106	0.1042	0.6508	0.9253	3001	5000		beta.i[7294]	0.003627	0.03209	0.0004986	-0.05994	0.00392	0.0662	3001	5000
Zv9_00011875 Zv9_00011876	1.36913	2.0848	2.63891	1.8809	16.0971	15.8076	9.55038	8.6567		pi.1[1700]	0.7097	0.2442	0.005216	0.1044	0.7698	0.9913	3001	5000		beta.i[1700]	0.001214	0.03175	0.0004071	-0.06186	0.001767	0.06346	3001	5000
Zv9_00027177	1	1	1.18464	19.2285	132.815	5.85521	1.77701	103.76		pi.1[3765]	0.6792	0.2406	0.005125	0.1046	0.7295	0.9882	3001	5000		beta.i[3765]	0.001068	0.03192	0.0004739	-0.06285	0.001273	0.06525	3001	5000
Zv9_00038870 Zv9_00038871	560.512	135.304	22.8773	12.8288	2.5303	1.57017	1.35342	1.12283		pi.1[5400]	0.3878	0.134	0.001882	0.1046	0.3941	0.625	3001	5000		beta.i[5400]	0.003634	0.03158	0.0007199	-0.05819	0.003941	0.06423	3001	5000
Zv9_00055667 Zv9_00055664 Zv9_00055666 Zv9_00055665	45.6075	26.4264	11.0236	7.45268	7.38346	8.0918	5.86151	3.07449		pi.1[7723]	0.4789	0.1701	0.002377	0.1046	0.4938	0.759	3001	5000		beta.i[7723]	0.002419	0.03134	0.0005635	-0.05914	0.002296	0.06254	3001	5000
Zv9_00050719 Zv9_00050718 Zv9_00050715 Zv9_00050710 Zv9_00050720 Zv9_00050711 Zv9_00050714 Zv9_00050721 Zv9_00050712 Zv9_00050713 Zv9_00050717 Zv9_00050726 Zv9_00050716	49.7962	50.7118	10.4207	1	10.508	7.32137	9.97259	17.2015		pi.1[7075]	0.4797	0.166	0.002103	0.1049	0.4954	0.757	3001	5000		beta.i[7075]	0.002187	0.03148	0.0005046	-0.0593	0.002194	0.06472	3001	5000
Zv9_00022666 Zv9_00022665	25.9209	15.5572	22.3705	16.0962	3.95077	5.09095	4.17112	3.16165		pi.1[3142]	0.5174	0.1836	0.002795	0.105	0.5412	0.804	3001	5000		beta.i[3142]	0.003143	0.03172	0.0004461	-0.0595	0.003419	0.06447	3001	5000
Zv9_00055413	1	1	1.00951	1.08126	10.5125	18.7303	16.2788	10.9821		pi.1[7693]	0.6936	0.2402	0.005515	0.105	0.7478	0.9887	3001	5000		beta.i[7693]	0.0002739	0.03192	0.0004709	-0.06231	0.0002541	0.06298	3001	5000
Zv9_00008977	1.7785	3.2231	16.3775	25.775	5.72085	3.66078	4.67476	1.80753		pi.1[1281]	0.6884	0.245	0.004741	0.1051	0.739	0.9904	3001	5000		beta.i[1281]	0.0005175	0.03083	0.000458	-0.0593	0.0008958	0.05988	3001	5000
Zv9_00030916	3.8299	13.3979	27.4856	20.6379	3.1184	1.44648	1.26617	1.3718		pi.1[4277]	0.6325	0.2279	0.003875	0.1052	0.6715	0.9599	3001	5000		beta.i[4277]	0.0008751	0.03158	0.0004676	-0.06318	0.001224	0.06182	3001	5000
Zv9_00001809 Zv9_00001810 Zv9_00001808 Zv9_00001811	1.67882	1.50251	5.01403	35.0216	8.38437	5.73546	5.82972	5.87007		pi.1[252]	0.6968	0.2417	0.005291	0.1054	0.7538	0.9897	3001	5000		beta.i[252]	0.0005839	0.03172	0.0004976	-0.06088	0.0006262	0.06331	3001	5000
Zv9_00030700 Zv9_00030701	36.1969	11.9585	11.6239	8.82856	10.4786	6.91056	6.55703	9.93686		pi.1[4243]	0.5012	0.1767	0.003118	0.1054	0.5231	0.7878	3001	5000		beta.i[4243]	0.002604	0.03166	0.000527	-0.05959	0.002937	0.06482	3001	5000
Zv9_00053761	1.00648	1	1.1719	1.09829	1.19949	27.1573	52.0051	18.424		pi.1[7485]	0.7034	0.2421	0.005754	0.1057	0.7648	0.988	3001	5000		beta.i[7485]	-0.0001434	0.0319	0.0005245	-0.05968	-0.000156	0.0634	3001	5000
Zv9_00044518 Zv9_00044519	40.8579	39.3333	13.4337	12.6219	3.60246	4.79498	3.24487	2.14611		pi.1[6184]	0.4786	0.1733	0.002732	0.1058	0.4956	0.7623	3001	5000		beta.i[6184]	0.003042	0.03148	0.0004484	-0.05921	0.003417	0.06388	3001	5000
Zv9_00054326 Zv9_00054327 Zv9_00054325	18.3181	19.5039	14.7252	9.09872	6.25927	3.77561	3.625	3.26256		pi.1[7545]	0.529	0.1896	0.002703	0.1058	0.5496	0.8311	3001	5000		beta.i[7545]	0.002329	0.03181	0.0005102	-0.05934	0.002429	0.06578	3001	5000
Zv9_00020181	15.5912	20.8361	32.2623	30.5123	1.6031	1.42505	1.41839	1.87525		pi.1[2808]	0.5235	0.1923	0.002835	0.1061	0.5449	0.8372	3001	5000		beta.i[2808]	0.003069	0.03172	0.0005997	-0.05985	0.002737	0.06613	3001	5000
Zv9_00038095 Zv9_00038094	1.00491	1.00475	1.00756	1	2.7422	10.383	21.2944	34.1181		pi.1[5303]	0.7232	0.2412	0.005568	0.1063	0.7867	0.9928	3001	5000		beta.i[5303]	-0.0001951	0.03206	0.0005271	-0.0634	-0.0002855	0.06285	3001	5000
Zv9_00016129	85.2809	23.8177	13.7246	6.70803	8.96378	7.46627	7.62358	7.11481		pi.1[2233]	0.4605	0.1611	0.002451	0.1065	0.4743	0.7315	3001	5000		beta.i[2233]	0.003105	0.03144	0.0004728	-0.05913	0.003162	0.06287	3001	5000
Zv9_00001863	5.15203	6.25976	4.96302	4.38707	2.13485	5.39392	10.4052	41.3956		pi.1[258]	0.6559	0.2262	0.004511	0.1066	0.7004	0.9552	3001	5000		beta.i[258]	0.001532	0.03146	0.0004453	-0.05957	0.001508	0.06466	3001	5000
Zv9_00017709 Zv9_00017705 Zv9_00017708 Zv9_00017714 Zv9_00017706 Zv9_00017711 Zv9_00017707	51.2182	24.1998	9.66761	5.56078	3.12868	7.9024	8.23274	27.889		pi.1[2457]	0.4872	0.1673	0.002475	0.1066	0.509	0.762	3001	5000		beta.i[2457]	0.00266	0.0318	0.0004844	-0.05989	0.00226	0.06395	3001	5000
Zv9_00045922 Zv9_00045921 Zv9_00045920	3.07721	2.77342	1.618	1.58585	2.19739	9.83274	13.2136	48.4479		pi.1[6406]	0.7076	0.2405	0.004768	0.1066	0.7678	0.9849	3001	5000		beta.i[6406]	0.00162	0.03141	0.0005097	-0.05997	0.001706	0.06056	3001	5000
Zv9_00038778 Zv9_00038775 Zv9_00038773 Zv9_00038777 Zv9_00038774 Zv9_00038772 Zv9_00038776 Zv9_00038779	80.4177	52.6395	14.989	5.12054	3.76381	9.2412	9.32595	3.87749		pi.1[5389]	0.462	0.1577	0.002073	0.1067	0.4766	0.7243	3001	5000		beta.i[5389]	0.004128	0.03144	0.0005488	-0.05604	0.003748	0.06627	3001	5000
Zv9_00042976	27.7992	11.5055	6.69056	12.0663	2.5711	4.93336	7.86446	95.9573		pi.1[5941]	0.5219	0.1814	0.002709	0.1067	0.5425	0.8062	3001	5000		beta.i[5941]	0.002467	0.03122	0.0005236	-0.05822	0.00199	0.06424	3001	5000
Zv9_00022305 Zv9_00022306	1.42279	1.24708	11.27	58.0587	132.809	1	1	1		pi.1[3092]	0.6383	0.2369	0.004241	0.1068	0.6695	0.9821	3001	5000		beta.i[3092]	0.0009011	0.03213	0.0004596	-0.06188	0.0002792	0.06492	3001	5000
Zv9_00015629 Zv9_00015630 Zv9_00015631	55.2987	26.7474	7.81485	6.23822	7.49279	6.33725	6.90372	12.0576		pi.1[2162]	0.4782	0.1695	0.002747	0.1069	0.4941	0.7534	3001	5000		beta.i[2162]	0.003484	0.03171	0.0004418	-0.05949	0.003384	0.0659	3001	5000
Zv9_00034070	51.3126	35.0543	44.1141	19.2579	1.80724	1.03765	1	1		pi.1[4744]	0.4707	0.1676	0.002651	0.1075	0.4843	0.7564	3001	5000		beta.i[4744]	0.002093	0.03122	0.0006026	-0.06008	0.002468	0.06157	3001	5000
Zv9_00027150 Zv9_00027151	4.53585	29.4593	10.8644	6.74649	4.60345	4.09114	3.39193	3.73389		pi.1[3761]	0.6269	0.2249	0.003756	0.1076	0.6622	0.9498	3001	5000		beta.i[3761]	0.002063	0.03167	0.0004574	-0.06038	0.002245	0.06424	3001	5000
Zv9_00039195 Zv9_00039194	56.6449	51.5763	10.4632	6.2439	4.7888	6.11979	4.86259	6.96403		pi.1[5447]	0.4769	0.1653	0.002754	0.1076	0.496	0.7515	3001	5000		beta.i[5447]	0.002801	0.0319	0.0005086	-0.06014	0.003235	0.06496	3001	5000
Zv9_00058040	40.7735	18.4832	17.2393	8.43175	4.13824	6.08644	6.18768	6.8413		pi.1[8073]	0.4941	0.1741	0.002639	0.1076	0.513	0.7774	3001	5000		beta.i[8073]	0.003552	0.03089	0.0004274	-0.05712	0.004006	0.06219	3001	5000
Zv9_00001469 Zv9_00001467 Zv9_00001468	328.598	137.789	17.5123	6.0086	4.21648	6.15851	4.3653	2.8067		pi.1[202]	0.4153	0.1395	0.002232	0.1077	0.4241	0.6582	3001	5000		beta.i[202]	0.003494	0.03161	0.0006096	-0.05831	0.003159	0.06572	3001	5000
Zv9_00028031 Zv9_00028033 Zv9_00028032	30.3985	19.5738	8.28975	10.9553	9.63077	5.40502	6.30719	4.59091		pi.1[3862]	0.502	0.1794	0.002776	0.1077	0.5212	0.786	3001	5000		beta.i[3862]	0.002928	0.03174	0.0005705	-0.06047	0.003565	0.06542	3001	5000
Zv9_00055678 Zv9_00055680 Zv9_00055679	16.9184	26.9556	40.8633	17.3575	1.52232	2.21852	2.41062	1.78362		pi.1[7725]	0.5306	0.1846	0.002988	0.1078	0.5498	0.8196	3001	5000		beta.i[7725]	0.002105	0.03176	0.00043	-0.06002	0.001883	0.0636	3001	5000
Zv9_00054402	27.9443	18.0548	8.07948	6.30506	1.70985	7.91503	17.2306	23.8901		pi.1[7552]	0.5234	0.181	0.003211	0.1083	0.5469	0.8069	3001	5000		beta.i[7552]	0.002867	0.03117	0.000466	-0.05966	0.003076	0.0644	3001	5000
Zv9_00029698 Zv9_00029692 Zv9_00029691 Zv9_00029696 Zv9_00029689 Zv9_00029695 Zv9_00029697 Zv9_00029693 Zv9_00029690	52.4043	42.2309	25.9958	7.31991	2.24666	4.19269	5.62314	8.06596		pi.1[4108]	0.4856	0.1676	0.002307	0.1086	0.5038	0.7589	3001	5000		beta.i[4108]	0.003088	0.03183	0.0004565	-0.06018	0.003499	0.06551	3001	5000
Zv9_00017325 Zv9_00017326	1.00445	1.00635	1.00738	1.06918	5.25454	12.5024	14.6102	23.5815		pi.1[2404]	0.7153	0.2439	0.005403	0.1087	0.7794	0.9919	3001	5000		beta.i[2404]	0.0008117	0.03125	0.0004279	-0.06151	0.0002537	0.0628	3001	5000
Zv9_00045571 Zv9_00045570 Zv9_00045572	48.0007	16.6967	9.26982	6.58599	11.9244	10.2019	8.81501	5.02497		pi.1[6357]	0.4839	0.1681	0.002782	0.1089	0.5012	0.7604	3001	5000		beta.i[6357]	0.002126	0.03168	0.0005003	-0.06118	0.002506	0.06521	3001	5000
Zv9_00033440	1.54524	1.25663	1.34747	1.76118	26.0861	19.213	12.1431	9.28297		pi.1[4650]	0.6997	0.2425	0.006124	0.1093	0.7555	0.9929	3001	5000		beta.i[4650]	0.0009247	0.03218	0.0004584	-0.0627	0.0009482	0.0636	3001	5000
Zv9_00040457 Zv9_00040453 Zv9_00040458 Zv9_00040455 Zv9_00040454 Zv9_00040459 Zv9_00040456	1.67569	1.49989	1.38308	1.19801	1.70473	14.481	22.8534	27.8596		pi.1[5612]	0.7141	0.2408	0.005173	0.1093	0.7776	0.9918	3001	5000		beta.i[5612]	0.0009301	0.03167	0.0004496	-0.06026	0.001063	0.06454	3001	5000
Zv9_00045995	27.2657	19.5972	29.5086	26.8871	3.35641	1.27307	1.10217	1.13281		pi.1[6414]	0.4956	0.1789	0.002579	0.1093	0.5144	0.7864	3001	5000		beta.i[6414]	0.001358	0.03145	0.0005014	-0.0592	0.000987	0.064	3001	5000
Zv9_00008952	3.50759	1	24.0707	146.672	16.9232	1	1	1		pi.1[1275]	0.6188	0.2232	0.003806	0.1095	0.6444	0.9617	3001	5000		beta.i[1275]	0.001552	0.03152	0.0005579	-0.06009	0.002038	0.06249	3001	5000
Zv9_00011575 Zv9_00011576	42.8871	20.1374	8.67197	4.02571	8.38432	8.03022	8.92451	9.51072		pi.1[1665]	0.4847	0.1741	0.0029	0.1095	0.5009	0.7722	3001	5000		beta.i[1665]	0.002292	0.03164	0.0004742	-0.05952	0.002425	0.06405	3001	5000
Zv9_00052428 Zv9_00052425 Zv9_00052427 Zv9_00052426	1.10846	1.03241	1.16321	1.74674	21.3909	13.1422	11.6425	13.7356		pi.1[7305]	0.7	0.2421	0.005424	0.1097	0.7556	0.9899	3001	5000		beta.i[7305]	0.0009581	0.03196	0.000482	-0.06053	0.0005176	0.06535	3001	5000
Zv9_00011024 Zv9_00011023	9.65803	4.95547	3.96142	3.11567	2.42871	20.5471	19.0199	18.0172		pi.1[1583]	0.5823	0.2097	0.00303	0.1098	0.6162	0.8904	3001	5000		beta.i[1583]	0.002133	0.03132	0.0005204	-0.05838	0.001452	0.06299	3001	5000
Zv9_00005190 Zv9_00005189 Zv9_00005188	1	1	1	2.32913	2.10542	5.62735	18.1461	52.0621		pi.1[746]	0.7245	0.2463	0.006287	0.1099	0.7952	0.9926	3001	5000		beta.i[746]	0.001461	0.03229	0.000502	-0.06139	0.001305	0.06585	3001	5000
Zv9_00011899 Zv9_00011900 Zv9_00011898	11.3108	19.753	19.5312	5.28555	5.08438	4.57849	4.09248	7.06943		pi.1[1705]	0.5715	0.198	0.003566	0.1099	0.5983	0.8735	3001	5000		beta.i[1705]	0.002328	0.03179	0.0004284	-0.05983	0.002125	0.06454	3001	5000
Zv9_00033647	1.11427	1.15692	1.20203	1.06887	4.61186	15.2784	14.3797	21.0349		pi.1[4683]	0.7218	0.2425	0.004948	0.1099	0.7857	0.9926	3001	5000		beta.i[4683]	0.0004428	0.03147	0.0005087	-0.06088	0.0007602	0.06095	3001	5000
Zv9_00034387 Zv9_00034390 Zv9_00034389 Zv9_00034388	1.20453	1.32483	6.47867	12.8483	14.3926	6.06046	5.48596	4.70825		pi.1[4788]	0.7081	0.2425	0.004494	0.1099	0.7677	0.9933	3001	5000		beta.i[4788]	0.0006071	0.03192	0.0004537	-0.06366	0.0001145	0.06295	3001	5000
Zv9_00008296 Zv9_00008298 Zv9_00008297	26.6839	19.3803	12.4535	5.84971	8.07686	6.93462	5.118	4.15789		pi.1[1162]	0.5091	0.1816	0.002841	0.11	0.5289	0.8031	3001	5000		beta.i[1162]	0.00318	0.03127	0.0004723	-0.05717	0.003101	0.06524	3001	5000
Zv9_00000525 Zv9_00000527 Zv9_00000526	1.31076	1.06219	2.4314	4.12356	1.59125	17.6109	33.8428	12.4373		pi.1[85]	0.7064	0.242	0.005696	0.1102	0.7662	0.9919	3001	5000		beta.i[85]	0.0007335	0.03116	0.000464	-0.0612	0.0007357	0.05996	3001	5000
Zv9_00008971	1.92927	1.30223	23.5892	30.6491	11.8905	3.68088	2.67857	1.58855		pi.1[1280]	0.6802	0.2403	0.005221	0.1104	0.7308	0.9882	3001	5000		beta.i[1280]	0.0009094	0.03226	0.0005221	-0.06319	0.000813	0.06479	3001	5000
Zv9_00039589 Zv9_00039588 Zv9_00039587	2.49517	2.19837	1.57912	4.52032	39.4324	21.2442	7.07979	1.65706		pi.1[5497]	0.6665	0.2399	0.004861	0.1106	0.7078	0.9874	3001	5000		beta.i[5497]	0.001777	0.03212	0.0005374	-0.06173	0.001811	0.06621	3001	5000
Zv9_00003560	6.74172	4.85462	9.3569	20.3495	11.0683	4.87533	4.1918	3.96826		pi.1[513]	0.6101	0.2116	0.003799	0.1108	0.6423	0.922	3001	5000		beta.i[513]	0.002757	0.03107	0.000395	-0.05784	0.002812	0.06272	3001	5000
Zv9_00007394 Zv9_00007390 Zv9_00007393 Zv9_00007391 Zv9_00007395 Zv9_00007392	1.03991	1.13038	1.21261	1.09639	1.16359	9.31791	19.3798	52.476		pi.1[1038]	0.7145	0.2411	0.005435	0.1108	0.7761	0.9904	3001	5000		beta.i[1038]	0.000354	0.03134	0.0004796	-0.06071	-4.649e-05	0.06284	3001	5000
Zv9_00018018	73.4619	24.5582	23.4519	8.7759	2.33533	6.03427	6.60557	10.2944		pi.1[2496]	0.4621	0.1649	0.002184	0.1109	0.4783	0.7379	3001	5000		beta.i[2496]	0.003733	0.03205	0.0005532	-0.05826	0.003259	0.06727	3001	5000
Zv9_00019261 Zv9_00019260 Zv9_00019259 Zv9_00019258	1.31299	1.07491	1.04747	1.67536	2.70827	12.8062	19.4664	20.3311		pi.1[2678]	0.7162	0.2443	0.005479	0.1109	0.7783	0.9931	3001	5000		beta.i[2678]	-0.000404	0.03154	0.0004606	-0.06371	-0.0002649	0.06179	3001	5000
Zv9_00039275 Zv9_00039276 Zv9_00039277 Zv9_00039278	25.2151	15.4179	25.925	22.4211	1.7678	2.96923	4.61949	11.2551		pi.1[5455]	0.5137	0.1829	0.002765	0.1109	0.5315	0.8069	3001	5000		beta.i[5455]	0.002461	0.03157	0.0004495	-0.05798	0.002341	0.06596	3001	5000
Zv9_00007214 Zv9_00007217 Zv9_00007209 Zv9_00007216 Zv9_00007211 Zv9_00007208 Zv9_00007210 Zv9_00007212 Zv9_00007220 Zv9_00007218 Zv9_00007213 Zv9_00007215 Zv9_00007219	34.6548	21.059	8.84048	5.01841	3.11985	7.53384	12.9939	16.955		pi.1[1012]	0.5064	0.1788	0.002631	0.111	0.5273	0.7994	3001	5000		beta.i[1012]	0.002883	0.03185	0.0004998	-0.05934	0.00297	0.06474	3001	5000
Zv9_00022094 Zv9_00022093	159.697	42.4309	12.0022	8.17187	9.36232	9.05512	9.16244	2.43108		pi.1[3064]	0.4331	0.1484	0.002044	0.1112	0.4429	0.6876	3001	5000		beta.i[3064]	0.003897	0.03196	0.0005312	-0.05923	0.003515	0.06703	3001	5000
Zv9_00040828	1.5219	2.09779	1	1	1.46015	18.4709	24.4755	24.8575		pi.1[5660]	0.7082	0.2461	0.005449	0.1115	0.7671	0.9915	3001	5000		beta.i[5660]	0.001157	0.03162	0.0004542	-0.06003	0.001377	0.06273	3001	5000
Zv9_00008341 Zv9_00008339 Zv9_00008340	1.57133	1.42523	2.00621	2.26925	2.70379	17.3743	20.8163	20.8058		pi.1[1168]	0.7281	0.2376	0.005657	0.1119	0.7917	0.9926	3001	5000		beta.i[1168]	0.0005481	0.03187	0.0005307	-0.06251	0.0007299	0.06342	3001	5000
Zv9_00048882	1.02755	1.0089	1.95561	7.70616	17.6293	19.1418	8.43506	2.43299		pi.1[6830]	0.6877	0.238	0.004931	0.1119	0.7346	0.9867	3001	5000		beta.i[6830]	0.0001442	0.03205	0.0005087	-0.06224	0.0001071	0.06269	3001	5000
Zv9_00003806	24.9108	16.6814	20.7094	12.7519	6.01387	4.00396	2.91855	4.04417		pi.1[541]	0.5149	0.1844	0.002918	0.1121	0.5394	0.8053	3001	5000		beta.i[541]	0.001871	0.03167	0.0004905	-0.06043	0.001678	0.06416	3001	5000
Zv9_00050057 Zv9_00050055 Zv9_00050058 Zv9_00050056	110.552	7.16231	5.29424	12.3487	16.9351	13.1702	15.0454	19.644		pi.1[6976]	0.4487	0.1562	0.002249	0.1121	0.4641	0.7161	3001	5000		beta.i[6976]	0.003026	0.03189	0.0005507	-0.05908	0.002901	0.06612	3001	5000
Zv9_00022112 Zv9_00022114 Zv9_00022111 Zv9_00022113	29.8537	27.0351	42.4001	15.5392	2.59402	1.32662	1.18116	1.17073		pi.1[3068]	0.4978	0.1753	0.002669	0.1122	0.5175	0.7871	3001	5000		beta.i[3068]	0.001167	0.03099	0.0004848	-0.05988	0.001294	0.06199	3001	5000
Zv9_00040085	1	1	2.5772	5.23932	8.42591	8.29747	10.3999	13.4414		pi.1[5559]	0.714	0.2426	0.005194	0.1122	0.772	0.9925	3001	5000		beta.i[5559]	0.0009463	0.03155	0.0005122	-0.06257	0.000674	0.06448	3001	5000
Zv9_00012261 Zv9_00012260 Zv9_00012263 Zv9_00012259	38.2334	24.5135	10.9166	3.16937	7.34229	8.504	7.969	11.7751		pi.1[1743]	0.498	0.173	0.002868	0.1126	0.5174	0.7724	3001	5000		beta.i[1743]	0.002899	0.03124	0.0004831	-0.05742	0.003595	0.06379	3001	5000
Zv9_00004033 Zv9_00004032 Zv9_00004035 Zv9_00004034	1	54.1745	50.131	25.3087	1	1	1	1		pi.1[570]	0.6388	0.234	0.004846	0.1129	0.6669	0.9812	3001	5000		beta.i[570]	0.0004492	0.03193	0.0005658	-0.06241	0.0007483	0.06268	3001	5000
Zv9_00016225 Zv9_00016224	1.03134	1.01401	1.40974	3.3448	16.8261	9.89756	9.61344	14.8988		pi.1[2252]	0.7166	0.2441	0.005935	0.1129	0.7801	0.9914	3001	5000		beta.i[2252]	0.000329	0.03185	0.0004836	-0.06197	2.082e-05	0.06188	3001	5000
Zv9_00053457 Zv9_00053459 Zv9_00053461 Zv9_00053462 Zv9_00053460 Zv9_00053456 Zv9_00053458	20.9871	1	72.5917	95.7687	1	31.4236	26.9786	20.9106		pi.1[7440]	0.5144	0.1772	0.003101	0.1129	0.5323	0.8035	3001	5000		beta.i[7440]	0.001241	0.03138	0.000511	-0.06015	0.0009804	0.06311	3001	5000
Zv9_00048619 Zv9_00048621 Zv9_00048620	22.8404	12.5818	16.6776	20.4071	6.34659	4.13825	3.54444	4.2959		pi.1[6794]	0.5208	0.1849	0.003261	0.1136	0.5419	0.8209	3001	5000		beta.i[6794]	0.002184	0.03147	0.0003972	-0.06061	0.002097	0.06506	3001	5000
Zv9_00012405 Zv9_00012406	1.98889	1.73192	1.83694	4.09569	12.2597	9.51946	9.67108	10.0813		pi.1[1759]	0.7087	0.2433	0.005554	0.1138	0.7725	0.9905	3001	5000		beta.i[1759]	0.00127	0.03152	0.0004872	-0.06083	0.002452	0.06193	3001	5000
Zv9_00007612 Zv9_00007613	7.55328	24.5521	8.608	8.40364	8.20503	4.50801	3.9414	2.7922		pi.1[1063]	0.5927	0.2055	0.003722	0.1142	0.6252	0.9025	3001	5000		beta.i[1063]	0.0009267	0.03128	0.0004585	-0.06007	0.001181	0.06337	3001	5000
Zv9_00011840	1.00266	1.00128	1.01026	1.01799	1.76534	27.5803	26.1208	15.083		pi.1[1695]	0.6992	0.2411	0.004955	0.1144	0.7553	0.9886	3001	5000		beta.i[1695]	0.0001307	0.03139	0.0004729	-0.06127	3.564e-07	0.06208	3001	5000
Zv9_00001011 Zv9_00001012 Zv9_00001007 Zv9_00001014 Zv9_00001013 Zv9_00001008 Zv9_00001009 Zv9_00001010 Zv9_00001006	2.05723	2.12125	4.69705	3.85148	7.16491	38.9706	30.7379	1		pi.1[149]	0.6702	0.2388	0.004923	0.1145	0.7165	0.9828	3001	5000		beta.i[149]	0.0009264	0.03156	0.0004904	-0.06021	0.0007002	0.06283	3001	5000
Zv9_00004074 Zv9_00004073	30.0776	23.4831	9.21444	5.69749	6.54594	9.24965	9.08928	6.01313		pi.1[576]	0.5131	0.1744	0.002707	0.1145	0.5343	0.7879	3001	5000		beta.i[576]	0.002686	0.03113	0.0005236	-0.05806	0.002948	0.06292	3001	5000
Zv9_00038177 Zv9_00038176 Zv9_00038179 Zv9_00038180 Zv9_00038178	15.8435	17.7396	19.1781	11.2892	7.13717	3.53169	3.29648	3.35681		pi.1[5312]	0.5526	0.1891	0.00371	0.1145	0.5795	0.8446	3001	5000		beta.i[5312]	0.00161	0.03085	0.00045	-0.05787	0.001576	0.06351	3001	5000
Zv9_00046031 Zv9_00046030	2.87253	2.9375	55.2045	115.919	2.28829	1.35176	1.13823	1.01753		pi.1[6420]	0.6138	0.2324	0.004134	0.1145	0.6454	0.9682	3001	5000		beta.i[6420]	0.001685	0.03174	0.0005053	-0.05971	0.00147	0.06415	3001	5000
Zv9_00029271	304.067	50.0184	34.5253	262.754	1	1	1	1		pi.1[4040]	0.3937	0.1356	0.002079	0.1146	0.4007	0.6368	3001	5000		beta.i[4040]	0.004078	0.03226	0.0006294	-0.05811	0.004456	0.06675	3001	5000
Zv9_00055240 Zv9_00055236 Zv9_00055241 Zv9_00055238 Zv9_00055242 Zv9_00055243 Zv9_00055237 Zv9_00055239 Zv9_00055235	3.4907	8.30773	4.94885	3.41621	1.85683	8.81163	12.6372	22.6692		pi.1[7664]	0.6899	0.2298	0.004624	0.1146	0.7403	0.9825	3001	5000		beta.i[7664]	0.001792	0.03141	0.0005326	-0.06044	0.002096	0.06078	3001	5000
Zv9_00044088 Zv9_00044089 Zv9_00044090	1.15537	1	10.4604	18.5864	7.0808	5.77868	4.63651	12.5986		pi.1[6105]	0.7036	0.242	0.004848	0.1147	0.7658	0.9874	3001	5000		beta.i[6105]	0.000859	0.03196	0.000535	-0.0618	0.0007499	0.06364	3001	5000
Zv9_00001941 Zv9_00001943	22.6272	20.0981	29.9437	18.6598	4.87907	3.18166	2.80695	3.20768		pi.1[269]	0.5326	0.1807	0.002948	0.1149	0.5541	0.8158	3001	5000		beta.i[269]	0.001575	0.0314	0.0005438	-0.06084	0.002159	0.06042	3001	5000
Zv9_00011457 Zv9_00011459 Zv9_00011458	15.7456	21.1349	18.951	5.79435	1.59702	5.19555	5.59533	18.3576		pi.1[1648]	0.5477	0.1929	0.002921	0.115	0.575	0.8424	3001	5000		beta.i[1648]	0.002596	0.03131	0.0004631	-0.05979	0.002911	0.06381	3001	5000
Zv9_00038924	71.9673	8.1466	8.18714	17.4549	18.9521	11.7711	9.65449	3.76843		pi.1[5412]	0.4659	0.1598	0.002452	0.1153	0.4773	0.7331	3001	5000		beta.i[5412]	0.003516	0.03165	0.0005549	-0.05856	0.003577	0.06718	3001	5000
Zv9_00048542	35.9229	15.0457	16.4238	14.5581	6.49649	4.77399	4.32715	3.74086		pi.1[6784]	0.4903	0.1739	0.002571	0.1153	0.5099	0.7783	3001	5000		beta.i[6784]	0.00238	0.03142	0.0004318	-0.05857	0.002279	0.06399	3001	5000
Zv9_00051209 Zv9_00051208 Zv9_00051210	2.66013	3.35268	1.87563	1.81887	8.19173	14.6149	15.5591	10.9468		pi.1[7147]	0.7047	0.2368	0.004774	0.1153	0.7633	0.9883	3001	5000		beta.i[7147]	0.001072	0.03159	0.000506	-0.06025	0.0007402	0.06323	3001	5000
Zv9_00007530 Zv9_00007531 Zv9_00007529 Zv9_00007532	1.46992	2.83787	1.14102	3.00869	4.25094	17.0948	16.652	19.2428		pi.1[1055]	0.7286	0.2414	0.005456	0.1154	0.7939	0.9932	3001	5000		beta.i[1055]	0.001571	0.03112	0.0004525	-0.05939	0.001244	0.06396	3001	5000
Zv9_00055403 Zv9_00055402 Zv9_00055404	40.1877	29.5835	6.88971	3.66235	10.7879	8.32822	8.55967	8.01321		pi.1[7689]	0.493	0.1749	0.002796	0.1154	0.5077	0.7819	3001	5000		beta.i[7689]	0.003042	0.03158	0.0004921	-0.05998	0.002985	0.06548	3001	5000
Zv9_00056123	95.9656	25.576	19.4181	28.1542	11.494	3.0762	2.34614	1.97606		pi.1[7775]	0.4578	0.156	0.00228	0.1154	0.471	0.7241	3001	5000		beta.i[7775]	0.00366	0.03233	0.0005337	-0.05947	0.003766	0.06716	3001	5000
Zv9_00053628	2.19921	1.00188	39.7765	24.0392	13.9646	3.19967	2.79308	3.84906		pi.1[7465]	0.6705	0.2403	0.005329	0.1156	0.7135	0.9853	3001	5000		beta.i[7465]	0.001747	0.03177	0.0004588	-0.05971	0.001196	0.06453	3001	5000
Zv9_00018339	4.6211	2.11202	3.13807	6.35662	16.3313	7.32156	8.08606	16.6246		pi.1[2547]	0.6611	0.2251	0.004479	0.1157	0.7042	0.9614	3001	5000		beta.i[2547]	0.002084	0.03139	0.0004958	-0.05872	0.00202	0.0642	3001	5000
Zv9_00006632	31.5844	12.8187	15.5965	18.0748	5.4835	5.17008	5.75887	8.46437		pi.1[928]	0.5127	0.1747	0.002899	0.1159	0.5289	0.7919	3001	5000		beta.i[928]	0.001902	0.03136	0.0005692	-0.0587	0.002061	0.06206	3001	5000
Zv9_00020217 Zv9_00020216	1.28958	1.37589	6.8531	17.1224	10.3786	6.77235	5.09469	5.16156		pi.1[2816]	0.7107	0.2428	0.005684	0.1159	0.7707	0.991	3001	5000		beta.i[2816]	0.001427	0.0315	0.0005296	-0.06078	0.001494	0.06369	3001	5000
Zv9_00000681 Zv9_00000678 Zv9_00000675 Zv9_00000679 Zv9_00000680 Zv9_00000683 Zv9_00000684 Zv9_00000676 Zv9_00000682 Zv9_00000685 Zv9_00000677	10.5651	32.9819	28.8244	21.6105	1	1	1	1		pi.1[102]	0.5459	0.1981	0.003074	0.1161	0.5656	0.8634	3001	5000		beta.i[102]	0.001511	0.03186	0.0004776	-0.06098	0.00117	0.06368	3001	5000
Zv9_00040087 Zv9_00040088 Zv9_00040091 Zv9_00040090 Zv9_00040086 Zv9_00040089	66.5569	31.7906	26.2769	13.3469	8.05019	3.68178	3.72005	3.02349		pi.1[5560]	0.4823	0.1607	0.00245	0.1162	0.4972	0.7487	3001	5000		beta.i[5560]	0.002601	0.03203	0.0004618	-0.0608	0.003126	0.06285	3001	5000
Zv9_00008038 Zv9_00008033 Zv9_00008039 Zv9_00008035 Zv9_00008037 Zv9_00008034	18.3965	33.0873	14.799	16.3104	2.18417	3.2028	4.50101	6.46799		pi.1[1126]	0.5317	0.188	0.002649	0.1164	0.5555	0.8326	3001	5000		beta.i[1126]	0.002444	0.03114	0.0004346	-0.059	0.002107	0.06412	3001	5000
Zv9_00010014 Zv9_00010015 Zv9_00010016	92.7183	26.986	7.56118	3.25044	10.1294	15.0631	16.4935	6.81317		pi.1[1440]	0.4588	0.1531	0.002529	0.1164	0.4732	0.7184	3001	5000		beta.i[1440]	0.004143	0.03174	0.0005155	-0.05703	0.004517	0.06611	3001	5000
Zv9_00011643	689.405	154.992	38.9944	7.21226	1.39382	1.03272	1	1		pi.1[1675]	0.3873	0.1281	0.001916	0.1164	0.3938	0.6178	3001	5000		beta.i[1675]	0.00293	0.03161	0.0006773	-0.05786	0.002749	0.06556	3001	5000
Zv9_00002411 Zv9_00002410	40.7667	13.0496	4.15702	7.98091	8.23086	14.63	17.8107	5.22401		pi.1[349]	0.4881	0.172	0.002633	0.1166	0.5029	0.7697	3001	5000		beta.i[349]	0.003171	0.0316	0.0004974	-0.05808	0.003301	0.06471	3001	5000
Zv9_00003987	1.04069	1.07563	1.38726	1.60911	1.69572	16.3971	20.8981	29.2368		pi.1[564]	0.729	0.2366	0.006561	0.1166	0.7902	0.9915	3001	5000		beta.i[564]	-0.0001043	0.03172	0.0004807	-0.06142	-0.0001542	0.06233	3001	5000
Zv9_00015823 Zv9_00015815 Zv9_00015817 Zv9_00015814 Zv9_00015825 Zv9_00015822 Zv9_00015820 Zv9_00015816 Zv9_00015812 Zv9_00015824 Zv9_00015821 Zv9_00015819 Zv9_00015813 Zv9_00015818	25.1002	24.7658	4.58119	2.45897	3.43497	9.39629	16.6485	24.2595		pi.1[2183]	0.5293	0.1822	0.002956	0.1166	0.5557	0.8133	3001	5000		beta.i[2183]	0.002675	0.0316	0.0004504	-0.05902	0.002189	0.06666	3001	5000
Zv9_00050121 Zv9_00050122	1.83568	2.49831	1.68645	4.46278	8.78554	9.02551	9.75071	26.4806		pi.1[6985]	0.7345	0.2283	0.005592	0.1166	0.7934	0.9895	3001	5000		beta.i[6985]	0.001116	0.03146	0.0005124	-0.06232	0.001203	0.06129	3001	5000
Zv9_00012316 Zv9_00012317	55.4424	24.0056	13.3324	8.18131	10.0879	7.66352	6.09863	3.00393		pi.1[1748]	0.4781	0.1659	0.002581	0.1168	0.4922	0.7544	3001	5000		beta.i[1748]	0.003377	0.03145	0.0005162	-0.05836	0.002667	0.0669	3001	5000
Zv9_00027520 Zv9_00027524 Zv9_00027521 Zv9_00027522 Zv9_00027523	240.787	100.421	1	1	1	68.4039	58.9634	20.4267		pi.1[3799]	0.4092	0.1402	0.002065	0.1168	0.4185	0.6609	3001	5000		beta.i[3799]	0.003201	0.03234	0.0006335	-0.05934	0.003104	0.06714	3001	5000
Zv9_00036944	70.1751	22.9801	13.028	14.897	12.7228	5.70504	4.08689	2.74402		pi.1[5130]	0.4705	0.161	0.002904	0.1168	0.4864	0.74	3001	5000		beta.i[5130]	0.002113	0.03107	0.0004397	-0.0575	0.002073	0.06319	3001	5000
Zv9_00045211	27.4565	21.2217	15.6387	10.2252	6.42742	5.09281	4.78719	3.80273		pi.1[6299]	0.5183	0.177	0.002676	0.1169	0.5396	0.7988	3001	5000		beta.i[6299]	0.002528	0.03152	0.0004388	-0.0593	0.002865	0.06422	3001	5000
Zv9_00045772	1.56544	1.00237	23.9239	30.1442	85.8278	1.9051	1.26477	1.19897		pi.1[6384]	0.6535	0.2372	0.004593	0.1169	0.6873	0.9847	3001	5000		beta.i[6384]	0.0007465	0.03164	0.0004102	-0.06103	0.0004058	0.06336	3001	5000
Zv9_00029407 Zv9_00029409 Zv9_00029406 Zv9_00029403 Zv9_00029404 Zv9_00029408 Zv9_00029405	1.42045	3.38295	2.24921	1.42589	15.7129	12.8303	12.2344	14.7509		pi.1[4065]	0.7063	0.2421	0.005438	0.1171	0.7676	0.9878	3001	5000		beta.i[4065]	0.0003944	0.03205	0.0003991	-0.06239	0.0004526	0.06412	3001	5000
Zv9_00008160	1.12361	1.13535	1.56548	57.1426	187.86	4.45327	1.13749	1.09394		pi.1[1144]	0.6326	0.2356	0.003976	0.1174	0.6606	0.9785	3001	5000		beta.i[1144]	6.363e-05	0.03195	0.0005181	-0.06245	-0.0004043	0.06198	3001	5000
Zv9_00008575	33.0991	18.3534	24.428	16.9671	1.69415	11.8291	12.5066	2.56402		pi.1[1197]	0.4948	0.175	0.002641	0.1174	0.5118	0.7827	3001	5000		beta.i[1197]	0.002559	0.03171	0.0006129	-0.05813	0.00304	0.06417	3001	5000
Zv9_00031359	12.6148	110.706	26.4554	6.45347	1.46258	2.02139	1.54742	1.09757		pi.1[4340]	0.5445	0.1882	0.003111	0.1174	0.5676	0.8462	3001	5000		beta.i[4340]	0.002005	0.03161	0.0004495	-0.06008	0.001643	0.06568	3001	5000
Zv9_00031385 Zv9_00031384	45.6278	18.3212	18.9673	7.88297	6.13612	6.55569	5.94855	6.71369		pi.1[4349]	0.4866	0.1705	0.002281	0.1175	0.5033	0.7679	3001	5000		beta.i[4349]	0.003034	0.03132	0.0004755	-0.05854	0.003242	0.06283	3001	5000
Zv9_00048624 Zv9_00048623 Zv9_00048622	111.979	46.2353	38.808	11.9847	4.14938	2.71123	2.11256	3.33803		pi.1[6795]	0.4515	0.1543	0.002352	0.1175	0.4648	0.7195	3001	5000		beta.i[6795]	0.001984	0.03172	0.0006021	-0.05949	0.002076	0.06486	3001	5000
Zv9_00054828 Zv9_00054827	34.8967	17.0385	20.074	6.39555	3.31261	7.87606	8.42934	8.54497		pi.1[7611]	0.5041	0.1739	0.002564	0.1177	0.5211	0.7855	3001	5000		beta.i[7611]	0.001883	0.03163	0.0004891	-0.06074	0.00259	0.06462	3001	5000
Zv9_00009510 Zv9_00009512 Zv9_00009518 Zv9_00009517 Zv9_00009513 Zv9_00009511 Zv9_00009515 Zv9_00009516 Zv9_00009514	34.3142	21.4797	18.649	11.9607	5.55171	5.66443	4.82603	5.92395		pi.1[1363]	0.5081	0.1738	0.00298	0.1179	0.528	0.7847	3001	5000		beta.i[1363]	0.002154	0.0323	0.0005597	-0.06052	0.001544	0.06678	3001	5000
Zv9_00028821	40.7907	19.675	23.3125	10.3932	9.72787	2.96401	2.18579	21.6278		pi.1[3986]	0.4944	0.1714	0.002419	0.1179	0.5101	0.7758	3001	5000		beta.i[3986]	0.002611	0.0317	0.000432	-0.0592	0.003066	0.0639	3001	5000
Zv9_00041747	1.67666	1.23127	1.21225	7.15828	26.1347	7.47296	7.72678	14.2076		pi.1[5790]	0.7134	0.2408	0.004841	0.1179	0.7734	0.9894	3001	5000		beta.i[5790]	0.0008358	0.0314	0.0004799	-0.06124	0.001062	0.06238	3001	5000
Zv9_00022161	33.0937	16.0276	7.11664	6.01482	8.9858	10.1663	10.0109	10.1924		pi.1[3073]	0.5114	0.1756	0.002658	0.118	0.5327	0.7928	3001	5000		beta.i[3073]	0.002989	0.03145	0.0003975	-0.05857	0.003203	0.06503	3001	5000
Zv9_00015508 Zv9_00015510 Zv9_00015509	44.345	20.6968	12.0358	4.39268	7.22885	9.70694	10.5268	11.538		pi.1[2142]	0.5008	0.1708	0.002903	0.1182	0.5226	0.7734	3001	5000		beta.i[2142]	0.002004	0.03197	0.0005036	-0.06115	0.002192	0.06465	3001	5000
Zv9_00007161	1.06811	1.02066	3.33156	24.3325	16.9064	11.4238	3.77933	3.89567		pi.1[1007]	0.6889	0.2405	0.004531	0.1184	0.7372	0.9885	3001	5000		beta.i[1007]	0.0004982	0.0319	0.0004194	-0.06193	0.0004554	0.06325	3001	5000
Zv9_00017878 Zv9_00017879 Zv9_00017880	19.2858	10.5896	22.5919	28.5334	4.97176	5.4969	3.01136	1.82966		pi.1[2483]	0.5332	0.1828	0.003485	0.1184	0.5541	0.8259	3001	5000		beta.i[2483]	0.002187	0.03166	0.0004546	-0.05865	0.002016	0.06448	3001	5000
Zv9_00036668 Zv9_00036667 Zv9_00036670 Zv9_00036671 Zv9_00036669	41.7781	38.0582	21.165	8.41384	6.02959	3.4936	3.55891	2.89089		pi.1[5088]	0.4938	0.1694	0.002757	0.1186	0.5096	0.7741	3001	5000		beta.i[5088]	0.002936	0.0318	0.000567	-0.05787	0.002824	0.06635	3001	5000
Zv9_00010731 Zv9_00010724 Zv9_00010726 Zv9_00010732 Zv9_00010729 Zv9_00010728 Zv9_00010733 Zv9_00010721 Zv9_00010737 Zv9_00010730 Zv9_00010722 Zv9_00010723 Zv9_00010727 Zv9_00010736 Zv9_00010725 Zv9_00010735 Zv9_00010734	1.91936	1	1.6302	1.31895	3.65325	15.7371	21.497	17.6559		pi.1[1545]	0.7149	0.2354	0.005179	0.1188	0.7751	0.9924	3001	5000		beta.i[1545]	0.0002497	0.0317	0.0004895	-0.06034	-0.0001183	0.06179	3001	5000
Zv9_00034545	30.268	20.9963	20.8098	9.0201	1.58147	8.75077	11.2756	8.79887		pi.1[4805]	0.5144	0.1752	0.002872	0.1188	0.5336	0.8023	3001	5000		beta.i[4805]	0.003611	0.03125	0.0004247	-0.05757	0.003985	0.06411	3001	5000
Zv9_00016845 Zv9_00016846	19.1019	50.7757	17.1765	4.56184	5.35314	3.39098	3.65473	7.43038		pi.1[2340]	0.538	0.1835	0.003155	0.1191	0.558	0.8323	3001	5000		beta.i[2340]	0.001852	0.03178	0.0004946	-0.06092	0.001563	0.0637	3001	5000
Zv9_00021239 Zv9_00021238	1	1	1.75211	15.581	16.0944	11.5696	9.1899	3.86838		pi.1[2957]	0.7016	0.239	0.00462	0.1191	0.7541	0.9903	3001	5000		beta.i[2957]	0.0001128	0.03184	0.0004163	-0.06233	9.651e-05	0.06257	3001	5000
Zv9_00033862	1	1.04058	1.0093	1.05022	1.22875	11.7922	26.2342	31.4224		pi.1[4717]	0.7132	0.2397	0.004914	0.1192	0.7733	0.9906	3001	5000		beta.i[4717]	0.0002796	0.03168	0.0005173	-0.06126	0.0002011	0.06329	3001	5000
Zv9_00046028 Zv9_00046026 Zv9_00046027	10.1618	24.0575	11.9942	4.39771	4.02005	6.67883	6.18026	7.26746		pi.1[6418]	0.5786	0.1988	0.003469	0.1192	0.606	0.8806	3001	5000		beta.i[6418]	0.0009126	0.03169	0.0005275	-0.0623	0.0004788	0.06493	3001	5000
Zv9_00011839	1.30147	1.34166	2.68916	1.60276	3.45725	24.6103	28.3064	7.60655		pi.1[1694]	0.696	0.2411	0.004574	0.1195	0.7528	0.9904	3001	5000		beta.i[1694]	0.000687	0.03165	0.0005287	-0.05937	0.0001775	0.06438	3001	5000
Zv9_00050447 Zv9_00050446	1	1	1	1	2.38966	14.1821	27.3729	18.2234		pi.1[7036]	0.7065	0.2374	0.005845	0.1195	0.7637	0.9907	3001	5000		beta.i[7036]	0.0005826	0.03215	0.0005231	-0.06018	-0.0001525	0.066	3001	5000
Zv9_00055574	40.0985	8.96497	20.2959	18.5779	4.41873	10.3768	7.47426	5.02127		pi.1[7704]	0.4861	0.1719	0.002987	0.1195	0.5011	0.7735	3001	5000		beta.i[7704]	0.002617	0.03108	0.0004573	-0.05804	0.00264	0.06285	3001	5000
Zv9_00005167	20.9928	16.6955	18.4537	16.1477	6.83383	2.96177	3.48256	4.08556		pi.1[743]	0.5281	0.1844	0.00355	0.1197	0.5456	0.8234	3001	5000		beta.i[743]	0.003075	0.03174	0.0004876	-0.05774	0.002931	0.0647	3001	5000
Zv9_00032909	36.3758	54.6631	8.73148	4.85934	9.66061	7.02599	5.84805	4.76908		pi.1[4558]	0.5071	0.1707	0.002854	0.1198	0.5261	0.7851	3001	5000		beta.i[4558]	0.003494	0.03156	0.000512	-0.0588	0.003787	0.06565	3001	5000
Zv9_00017527 Zv9_00017524 Zv9_00017525 Zv9_00017528	75.4075	24.9386	9.80439	9.23538	32.4001	5.87599	5.7716	9.00368		pi.1[2433]	0.4765	0.1593	0.002395	0.12	0.4921	0.7408	3001	5000		beta.i[2433]	0.002482	0.03091	0.0004506	-0.05777	0.001783	0.06311	3001	5000
Zv9_00022267 Zv9_00022268	1.85296	1.44553	1.59456	1.28268	4.09174	41.3623	26.6484	7.69122		pi.1[3088]	0.6931	0.2351	0.004955	0.12	0.7438	0.9879	3001	5000		beta.i[3088]	0.001358	0.0315	0.0005135	-0.06092	0.001787	0.0637	3001	5000
Zv9_00033143 Zv9_00033142 Zv9_00033144	1.36264	1.48296	1.29127	1.37552	4.46919	14.3999	17.1646	22.4973		pi.1[4600]	0.7222	0.2352	0.005914	0.12	0.7841	0.9902	3001	5000		beta.i[4600]	0.0007773	0.03168	0.0004159	-0.06071	0.0007059	0.06259	3001	5000
Zv9_00000358	1.78505	2.52487	4.85927	31.7239	7.55031	9.32798	6.71262	2.94317		pi.1[62]	0.689	0.2436	0.005042	0.1201	0.7429	0.989	3001	5000		beta.i[62]	0.001129	0.0321	0.0004848	-0.06233	0.001371	0.06292	3001	5000
Zv9_00002659	1	1	1	1	1.55738	25.2091	24.8843	17.9055		pi.1[380]	0.7003	0.237	0.005055	0.1202	0.755	0.9883	3001	5000		beta.i[380]	0.0006522	0.03183	0.0004424	-0.06035	0.0006641	0.06307	3001	5000
Zv9_00006659 Zv9_00006658	52.8861	46.1646	18.6124	9.16516	4.35762	2.92931	2.67698	6.75718		pi.1[929]	0.4822	0.1671	0.00271	0.1202	0.4938	0.7612	3001	5000		beta.i[929]	0.002361	0.03142	0.0005165	-0.06065	0.002536	0.06443	3001	5000
Zv9_00027107 Zv9_00027108 Zv9_00027109	50.539	23.322	11.6831	7.63153	10.1436	7.31146	6.06356	4.42806		pi.1[3751]	0.4857	0.167	0.002533	0.1202	0.5017	0.7581	3001	5000		beta.i[3751]	0.002757	0.03182	0.0004241	-0.05858	0.00256	0.06654	3001	5000
Zv9_00036382	2.61561	2.67951	2.38257	3.67372	5.8177	7.81674	17.1706	14.9436		pi.1[5046]	0.7111	0.2324	0.004707	0.1206	0.7684	0.9876	3001	5000		beta.i[5046]	0.001348	0.03188	0.0005116	-0.0616	0.0007375	0.06503	3001	5000
Zv9_00054404 Zv9_00054405	101.197	22.5115	14.9696	21.7842	2.94696	8.52636	8.13984	12.3171		pi.1[7554]	0.4586	0.1537	0.002652	0.1207	0.4724	0.7193	3001	5000		beta.i[7554]	0.003965	0.03201	0.0005255	-0.05878	0.003985	0.06708	3001	5000
Zv9_00055092 Zv9_00055095 Zv9_00055093 Zv9_00055094 Zv9_00055096	29.1224	21.3757	29.1309	16.6753	3.78819	3.25158	3.03441	3.54893		pi.1[7647]	0.5154	0.1727	0.002716	0.1209	0.5349	0.7923	3001	5000		beta.i[7647]	0.002494	0.0313	0.0005028	-0.05829	0.002645	0.0645	3001	5000
Zv9_00056605 Zv9_00056604	7.11178	18.1855	30.4956	10.3837	1.74625	3.56441	3.94278	3.62414		pi.1[7836]	0.6003	0.2094	0.003418	0.1209	0.6319	0.9104	3001	5000		beta.i[7836]	0.0001448	0.03121	0.0005274	-0.06	0.0001369	0.06154	3001	5000
Zv9_00019678	1	1	1.08229	1.55726	4.9249	17.2438	17.9027	15.1319		pi.1[2734]	0.7206	0.235	0.005117	0.1212	0.7799	0.9903	3001	5000		beta.i[2734]	6.449e-06	0.03177	0.0005051	-0.06419	-0.0005735	0.0624	3001	5000
Zv9_00031400 Zv9_00031403 Zv9_00031402 Zv9_00031401	1	1	1	1	1	52.3953	34.5316	18.6093		pi.1[4353]	0.6806	0.2395	0.004771	0.1213	0.7277	0.9883	3001	5000		beta.i[4353]	0.0005146	0.03181	0.0004616	-0.06147	0.0005418	0.06338	3001	5000
Zv9_00047154 Zv9_00047153	2.50265	1.9916	2.9953	2.465	11.8895	16.5285	10.5039	7.43422		pi.1[6577]	0.7002	0.2378	0.005189	0.1213	0.754	0.9891	3001	5000		beta.i[6577]	0.001811	0.0316	0.0004717	-0.05898	0.001441	0.06491	3001	5000
Zv9_00052129 Zv9_00052130	96.8641	36.5338	9.83167	4.11258	9.18618	9.7085	11.2952	6.37709		pi.1[7258]	0.4576	0.1563	0.002351	0.1214	0.4756	0.724	3001	5000		beta.i[7258]	0.003015	0.03114	0.0005646	-0.05868	0.003077	0.06351	3001	5000
Zv9_00057270 Zv9_00057271	81.0378	37.2126	6.62981	6.65276	18.4182	8.42428	6.12084	3.50189		pi.1[7934]	0.4589	0.1566	0.002125	0.1214	0.4717	0.7263	3001	5000		beta.i[7934]	0.002789	0.03137	0.0005369	-0.05758	0.002758	0.06368	3001	5000
Zv9_00021829	11.7664	23.5922	17.7667	24.0884	7.54735	1.28835	1.17718	1.15856		pi.1[3032]	0.5623	0.1893	0.002912	0.1216	0.5856	0.8586	3001	5000		beta.i[3032]	0.001238	0.03218	0.0005269	-0.06199	0.001396	0.06703	3001	5000
Zv9_00026308	15.1267	33.8353	31.0615	10.9675	4.01915	1.0527	1	1		pi.1[3637]	0.5427	0.1875	0.003011	0.1217	0.5659	0.8393	3001	5000		beta.i[3637]	0.00157	0.03126	0.000511	-0.05875	0.00158	0.06275	3001	5000
Zv9_00034442 Zv9_00034441 Zv9_00034443 Zv9_00034440	30.5079	7.93962	6.83308	7.8902	6.6287	11.0196	12.2546	25.381		pi.1[4789]	0.5228	0.1733	0.002613	0.1217	0.5428	0.7971	3001	5000		beta.i[4789]	0.003078	0.0315	0.0005408	-0.05827	0.002211	0.06444	3001	5000
Zv9_00004744 Zv9_00004745	7.74833	24.5519	30.5066	9.99648	9.61402	1	1	1		pi.1[689]	0.5804	0.2028	0.003236	0.1219	0.6055	0.8927	3001	5000		beta.i[689]	0.003008	0.03174	0.0004403	-0.05931	0.002939	0.06418	3001	5000
Zv9_00030521	73.0311	28.9589	17.1926	8.99628	5.8601	9.43888	7.10638	8.97595		pi.1[4222]	0.4818	0.1621	0.002252	0.122	0.4947	0.7551	3001	5000		beta.i[4222]	0.003199	0.03192	0.0004811	-0.05942	0.0031	0.06729	3001	5000
Zv9_00025588	1.36739	1.63112	1.33845	7.29814	28.9841	8.73734	6.9983	8.43116		pi.1[3533]	0.7016	0.2384	0.00539	0.1221	0.7562	0.9905	3001	5000		beta.i[3533]	0.0006704	0.03161	0.0004759	-0.05892	0.0002854	0.06368	3001	5000
Zv9_00000431 Zv9_00000433 Zv9_00000432	36.4374	27.6036	17.7834	6.94233	4.45094	5.2958	5.08409	6.7016		pi.1[71]	0.5008	0.1723	0.002664	0.1222	0.5178	0.7776	3001	5000		beta.i[71]	0.002895	0.03127	0.0004334	-0.05961	0.003433	0.06376	3001	5000
Zv9_00011348 Zv9_00011344 Zv9_00011347 Zv9_00011346 Zv9_00011345	1.7953	1.08632	1.22302	1	8.27063	20.4597	18.6178	13.4682		pi.1[1631]	0.7162	0.2364	0.005129	0.1223	0.7726	0.9886	3001	5000		beta.i[1631]	0.0005431	0.03107	0.0004364	-0.06129	0.000363	0.06068	3001	5000
Zv9_00051418 Zv9_00051417	43.4328	16.8451	7.25759	4.74952	10.8979	15.141	10.2367	8.27753		pi.1[7172]	0.4938	0.1714	0.002879	0.1225	0.5121	0.772	3001	5000		beta.i[7172]	0.00258	0.03215	0.0004665	-0.0618	0.002818	0.06525	3001	5000
Zv9_00016123 Zv9_00016121 Zv9_00016122 Zv9_00016118 Zv9_00016119 Zv9_00016120	2.77709	1.9831	11.7986	24.1863	10.2289	4.14105	5.78675	3.45175		pi.1[2229]	0.6852	0.2347	0.005144	0.1226	0.732	0.9839	3001	5000		beta.i[2229]	0.000993	0.03194	0.0005003	-0.06066	0.001096	0.06266	3001	5000
Zv9_00023552 Zv9_00023545 Zv9_00023547 Zv9_00023551 Zv9_00023548 Zv9_00023544 Zv9_00023546 Zv9_00023549 Zv9_00023550	59.7372	51.7572	1	1	1	56.2919	47.2575	46.6058		pi.1[3269]	0.4727	0.1584	0.002158	0.123	0.4858	0.7457	3001	5000		beta.i[3269]	0.003873	0.03162	0.0005071	-0.05934	0.003937	0.06484	3001	5000
Zv9_00048153	1.21639	1.24291	5.50908	39.2668	14.547	4.74868	4.22527	5.76106		pi.1[6725]	0.7042	0.2348	0.005357	0.1231	0.7539	0.9913	3001	5000		beta.i[6725]	-0.0002615	0.03138	0.0004964	-0.06166	-5.452e-05	0.06116	3001	5000
Zv9_00020452 Zv9_00020453	1	1	1	11.2427	70.82	8.58625	1.81666	150.266		pi.1[2853]	0.6937	0.2359	0.005325	0.1232	0.7446	0.9886	3001	5000		beta.i[2853]	0.001364	0.03115	0.0005391	-0.06096	0.001299	0.06177	3001	5000
Zv9_00033080 Zv9_00033082 Zv9_00033083 Zv9_00033081	14.9495	9.15919	26.0278	24.6259	51.9136	1	1	1		pi.1[4586]	0.5345	0.186	0.002969	0.1232	0.5532	0.8364	3001	5000		beta.i[4586]	0.002407	0.03199	0.0005118	-0.06039	0.002148	0.06338	3001	5000
Zv9_00027062 Zv9_00027061 Zv9_00027059	9.25162	8.40608	5.17669	13.0615	26.2056	8.1404	5.13553	3.02408		pi.1[3741]	0.5926	0.2008	0.00371	0.1233	0.6288	0.8912	3001	5000		beta.i[3741]	0.001975	0.03161	0.0004117	-0.05951	0.001861	0.06476	3001	5000
Zv9_00017383	175.081	46.6834	38.3463	26.0724	4.57447	1.04938	1.24003	3.6456		pi.1[2411]	0.4331	0.1448	0.002309	0.1234	0.4456	0.6817	3001	5000		beta.i[2411]	0.003902	0.03147	0.0005392	-0.05634	0.003637	0.06629	3001	5000
Zv9_00014274 Zv9_00014273 Zv9_00014272	30.1706	15.3068	5.34212	10.8538	17.7895	7.51776	7.61463	6.11649		pi.1[1979]	0.5141	0.175	0.002817	0.1237	0.5314	0.7977	3001	5000		beta.i[1979]	0.00316	0.03177	0.000521	-0.0585	0.003019	0.06649	3001	5000
Zv9_00010514 Zv9_00010516 Zv9_00010515 Zv9_00010517	1	1	1	20.5809	11.678	9.13482	9.43877	13.2289		pi.1[1514]	0.7101	0.2389	0.005474	0.1238	0.7664	0.9918	3001	5000		beta.i[1514]	0.0006374	0.03155	0.0004801	-0.06103	0.0005857	0.06074	3001	5000
Zv9_00011075 Zv9_00011074	40.8701	45.0719	16.3522	5.93277	5.34722	4.84812	4.91213	3.82312		pi.1[1593]	0.4961	0.1689	0.002622	0.1239	0.5133	0.7717	3001	5000		beta.i[1593]	0.002598	0.03203	0.0004683	-0.05846	0.002778	0.06602	3001	5000
Zv9_00039689 Zv9_00039688	1.42949	2.17602	2.68781	4.76864	80.851	11.6657	5.01111	2.51896		pi.1[5512]	0.6658	0.2397	0.004835	0.1239	0.705	0.9883	3001	5000		beta.i[5512]	0.0004463	0.03179	0.0004919	-0.06056	0.0002867	0.06221	3001	5000
Zv9_00010246	1.89238	1.58653	26.5117	30.1523	8.52912	3.61262	3.01047	1.76671		pi.1[1485]	0.6885	0.2404	0.005262	0.124	0.7378	0.9885	3001	5000		beta.i[1485]	0.0005761	0.03155	0.0004169	-0.06164	0.0008277	0.06165	3001	5000
Zv9_00053480	290.394	51.305	60.0186	14.026	8.53204	1	1	1		pi.1[7444]	0.4175	0.1369	0.001887	0.1242	0.4261	0.6565	3001	5000		beta.i[7444]	0.003442	0.03184	0.0005705	-0.05779	0.003199	0.06689	3001	5000
Zv9_00000137	49.116	29.5091	38.6172	32.3779	3.05525	1.9021	1	1		pi.1[23]	0.482	0.1636	0.002513	0.1243	0.4971	0.7531	3001	5000		beta.i[23]	0.002955	0.03203	0.0004305	-0.05764	0.002769	0.0651	3001	5000
Zv9_00007636	170.888	47.3289	12.2233	7.17912	11.7991	9.61467	7.29589	3.28346		pi.1[1068]	0.4395	0.148	0.001942	0.1244	0.4479	0.7007	3001	5000		beta.i[1068]	0.003063	0.03201	0.0005666	-0.05911	0.00307	0.06506	3001	5000
Zv9_00057851	30.4951	11.7201	12.6557	10.3935	6.76303	7.65021	8.16945	6.5016		pi.1[8050]	0.5108	0.1759	0.00317	0.1248	0.5327	0.7933	3001	5000		beta.i[8050]	0.002877	0.03213	0.0005114	-0.06197	0.003082	0.06571	3001	5000
Zv9_00057994	31.5281	16.1602	24.4628	19.835	6.50085	3.37685	4.29745	5.47144		pi.1[8067]	0.521	0.175	0.002504	0.1248	0.5439	0.8026	3001	5000		beta.i[8067]	0.002501	0.0322	0.0005048	-0.05904	0.002244	0.06551	3001	5000
Zv9_00021142	86.9999	41.4183	18.6225	6.79745	6.79321	5.67978	5.458	6.74334		pi.1[2938]	0.4709	0.1569	0.001937	0.1251	0.4848	0.7342	3001	5000		beta.i[2938]	0.003895	0.03152	0.0005027	-0.05736	0.003711	0.06602	3001	5000
Zv9_00029626	1.16312	1.11059	1.1776	1.47186	1.77068	8.15425	24.7416	38.8751		pi.1[4100]	0.7272	0.2375	0.005407	0.1257	0.7905	0.992	3001	5000		beta.i[4100]	-0.0007261	0.03158	0.0004556	-0.06304	-0.0004659	0.0606	3001	5000
Zv9_00003429 Zv9_00003428 Zv9_00003427 Zv9_00003430 Zv9_00003426	29.9782	19.7232	28.1122	12.9715	7.94124	13.1043	1	1		pi.1[495]	0.5086	0.1692	0.002749	0.1258	0.5249	0.7872	3001	5000		beta.i[495]	0.00302	0.03171	0.0004133	-0.05847	0.002897	0.06668	3001	5000
Zv9_00049064 Zv9_00049060 Zv9_00049062 Zv9_00049055 Zv9_00049063 Zv9_00049061 Zv9_00049054 Zv9_00049057 Zv9_00049056 Zv9_00049065 Zv9_00049058 Zv9_00049066 Zv9_00049059	66.8289	29.5126	16.9985	29.8456	77.6591	1	1	1		pi.1[6854]	0.4685	0.1568	0.002477	0.1258	0.4814	0.741	3001	5000		beta.i[6854]	0.001955	0.03194	0.000578	-0.06033	0.001982	0.06588	3001	5000
Zv9_00057719	1	1	1.70917	2.91967	8.92481	10.5584	13.871	16.3403		pi.1[8024]	0.7167	0.2394	0.005997	0.1258	0.7766	0.9917	3001	5000		beta.i[8024]	4.682e-05	0.03171	0.0005133	-0.06278	0.000382	0.0621	3001	5000
Zv9_00013206 Zv9_00013209 Zv9_00013207 Zv9_00013208	33.0895	10.8751	5.82148	5.86456	10.2643	12.1138	15.5492	11.1602		pi.1[1847]	0.5193	0.1729	0.002748	0.126	0.5399	0.793	3001	5000		beta.i[1847]	0.003448	0.03233	0.0004883	-0.05884	0.003341	0.06814	3001	5000
Zv9_00023406 Zv9_00023405 Zv9_00023404	32.8042	28.7118	12.521	7.87798	7.47871	6.13345	5.79516	4.86333		pi.1[3248]	0.5139	0.1739	0.002354	0.126	0.5362	0.7977	3001	5000		beta.i[3248]	0.001776	0.03106	0.0005251	-0.05965	0.001701	0.06141	3001	5000
Zv9_00006883	2.069	2.27393	11.5958	15.9964	11.1497	5.2069	5.13824	3.64312		pi.1[966]	0.706	0.2338	0.005136	0.1262	0.7597	0.991	3001	5000		beta.i[966]	0.000374	0.03159	0.0004478	-0.06109	0.0003254	0.06173	3001	5000
Zv9_00032469 Zv9_00032468 Zv9_00032472 Zv9_00032471	1.06726	1.354	1.51263	1.57588	1.21053	8.23708	25.8327	44.7818		pi.1[4507]	0.7306	0.241	0.005417	0.1262	0.8024	0.9924	3001	5000		beta.i[4507]	0.0007622	0.03127	0.0005423	-0.0594	0.000847	0.06167	3001	5000
Zv9_00004599 Zv9_00004601 Zv9_00004600	263.234	161.545	223.006	1	1	1	1	1		pi.1[666]	0.4076	0.1356	0.002069	0.1264	0.4155	0.6487	3001	5000		beta.i[666]	0.002387	0.03133	0.0006829	-0.05897	0.002772	0.06387	3001	5000
Zv9_00040371 Zv9_00040373 Zv9_00040372 Zv9_00040374	10.178	21.5081	31.2254	16.4187	1.70768	2.27952	2.35466	4.16826		pi.1[5601]	0.5711	0.1967	0.003137	0.1264	0.5991	0.8732	3001	5000		beta.i[5601]	0.001834	0.03181	0.0004802	-0.05929	0.001608	0.06472	3001	5000
Zv9_00027132	80.7578	21.4394	26.4124	35.1489	23.3244	1	1	1		pi.1[3755]	0.4612	0.1521	0.002564	0.1266	0.4719	0.7264	3001	5000		beta.i[3755]	0.00312	0.03129	0.0005514	-0.05845	0.003327	0.0659	3001	5000
Zv9_00039479	30.1803	22.0663	22.7817	18.5823	11.1501	1	7.02938	4.60648		pi.1[5485]	0.5146	0.1717	0.002693	0.1266	0.5355	0.7934	3001	5000		beta.i[5485]	0.002706	0.03156	0.0004521	-0.05911	0.002664	0.06539	3001	5000
Zv9_00029313	102.364	59.7842	36.4164	21.4101	4.97702	1.26182	1.10128	1.13485		pi.1[4048]	0.4653	0.1509	0.002529	0.1267	0.4784	0.7207	3001	5000		beta.i[4048]	0.001902	0.03221	0.0006017	-0.06174	0.001491	0.06561	3001	5000
Zv9_00003151	1.17084	1.11688	1.1763	1.61963	5.37851	16.1151	28.9254	10.3414		pi.1[453]	0.7089	0.2375	0.005219	0.1269	0.7681	0.9917	3001	5000		beta.i[453]	0.0006813	0.03171	0.0004621	-0.06302	0.0007449	0.06277	3001	5000
Zv9_00027197 Zv9_00027200 Zv9_00027199 Zv9_00027198	106.99	11.7459	10.9024	10.5576	14.4335	16.305	13.9664	4.3538		pi.1[3766]	0.4592	0.1517	0.002366	0.127	0.4724	0.7159	3001	5000		beta.i[3766]	0.002519	0.03179	0.0004327	-0.05984	0.002587	0.06455	3001	5000
Zv9_00018422	1.28453	1.09253	5.48655	20.72	11.709	5.84175	5.98382	3.8346		pi.1[2565]	0.6955	0.2405	0.004849	0.1273	0.7439	0.9909	3001	5000		beta.i[2565]	0.0003188	0.03139	0.0003995	-0.06019	-0.0001222	0.06287	3001	5000
Zv9_00029296 Zv9_00029284 Zv9_00029283 Zv9_00029291 Zv9_00029289 Zv9_00029285 Zv9_00029282 Zv9_00029290	51.972	24.0599	28.2409	12.0535	5.46122	4.59086	4.65868	5.30638		pi.1[4041]	0.4952	0.1609	0.002877	0.1274	0.5111	0.7629	3001	5000		beta.i[4041]	0.003034	0.03151	0.0005193	-0.05906	0.003076	0.06492	3001	5000
Zv9_00046204	44.3473	33.4664	17.3371	6.37865	2.95615	5.74525	6.89096	9.57591		pi.1[6439]	0.495	0.1663	0.002612	0.1274	0.5106	0.776	3001	5000		beta.i[6439]	0.002919	0.03154	0.0004596	-0.06056	0.002782	0.06294	3001	5000
Zv9_00004002	39.6475	12.815	15.9661	12.4016	6.22431	5.93292	7.63689	6.40497		pi.1[568]	0.4938	0.1694	0.002478	0.1275	0.513	0.7696	3001	5000		beta.i[568]	0.00284	0.03178	0.0004458	-0.05941	0.002403	0.06512	3001	5000
Zv9_00016113 Zv9_00016112	1	1.00495	1	2.37365	7.56192	16.6069	13.5065	14.6742		pi.1[2227]	0.7249	0.2368	0.005454	0.1275	0.7838	0.9931	3001	5000		beta.i[2227]	0.0003341	0.0316	0.0004105	-0.06159	-0.0004355	0.06422	3001	5000
Zv9_00015733 Zv9_00015729 Zv9_00015730 Zv9_00015732 Zv9_00015731	2.79058	2.72723	1.66821	1.39459	2.27121	10.0337	15.8387	42.5281		pi.1[2171]	0.7062	0.2395	0.005891	0.1276	0.7646	0.9871	3001	5000		beta.i[2171]	0.001487	0.0318	0.0004758	-0.0608	0.001654	0.06268	3001	5000
Zv9_00051791 Zv9_00051796 Zv9_00051795 Zv9_00051793 Zv9_00051792	38.0539	40.4581	43.3289	15.0614	4.5793	1.40714	1	1		pi.1[7217]	0.503	0.1671	0.00247	0.1278	0.5187	0.777	3001	5000		beta.i[7217]	0.002926	0.03137	0.0004443	-0.05926	0.002494	0.06546	3001	5000
Zv9_00017163 Zv9_00017162 Zv9_00017161	30.4249	28.6801	24.6821	6.63266	11.3731	3.29878	3.07837	3.58211		pi.1[2379]	0.5087	0.1772	0.002414	0.1282	0.5295	0.7961	3001	5000		beta.i[2379]	0.003112	0.03214	0.0005797	-0.05906	0.002738	0.0665	3001	5000
Zv9_00047882	1.0216	1.03807	1.03879	1.24597	1.33192	21.9272	27.6417	22.1048		pi.1[6679]	0.7145	0.2361	0.005277	0.1282	0.773	0.9909	3001	5000		beta.i[6679]	0.0006535	0.03167	0.0004554	-0.06291	0.001001	0.06308	3001	5000
Zv9_00030017 Zv9_00030022 Zv9_00030023 Zv9_00030024 Zv9_00030018 Zv9_00030019 Zv9_00030021 Zv9_00030020 Zv9_00030025	1	1	1	1.04244	1.25154	12.226	31.5697	27.4204		pi.1[4150]	0.7142	0.236	0.005149	0.1284	0.7728	0.9909	3001	5000		beta.i[4150]	0.000659	0.03119	0.0004949	-0.06011	0.0007581	0.06121	3001	5000
Zv9_00012390 Zv9_00012389 Zv9_00012388 Zv9_00012391	1.14428	1.25919	1.05902	1.05731	2.48946	23.9263	25.6843	14.6282		pi.1[1757]	0.7054	0.2379	0.005867	0.1286	0.7599	0.9896	3001	5000		beta.i[1757]	0.0005938	0.03103	0.000482	-0.06023	0.0008639	0.06075	3001	5000
Zv9_00048975 Zv9_00048973 Zv9_00048970 Zv9_00048969 Zv9_00048972 Zv9_00048971	2.92745	4.37835	3.31535	1	22.1605	11.6225	15.4398	10.7954		pi.1[6843]	0.6782	0.2346	0.004213	0.1287	0.7274	0.9836	3001	5000		beta.i[6843]	0.001607	0.03209	0.0004765	-0.05969	0.001453	0.06462	3001	5000
Zv9_00049169 Zv9_00049167 Zv9_00049168 Zv9_00049170 Zv9_00049166 Zv9_00049171	1.37992	1.47218	1.8661	14.0153	11.4155	9.66417	7.67926	8.57422		pi.1[6864]	0.7146	0.2383	0.006003	0.1288	0.7748	0.9909	3001	5000		beta.i[6864]	-3.62e-05	0.03144	0.0004831	-0.06081	0.0006721	0.06028	3001	5000
Zv9_00004634	57.4364	12.3417	18.5381	27.0252	9.49279	6.34374	5.72477	2.25085		pi.1[672]	0.4766	0.1614	0.002957	0.129	0.4895	0.7478	3001	5000		beta.i[672]	0.002955	0.03151	0.0005224	-0.05977	0.002777	0.06364	3001	5000
Zv9_00018195	4.19436	4.19984	4.71019	2.13793	2.28841	8.58589	18.7826	20.943		pi.1[2529]	0.6734	0.2296	0.004715	0.129	0.7268	0.9692	3001	5000		beta.i[2529]	0.001959	0.03146	0.0005057	-0.05913	0.002217	0.06494	3001	5000
Zv9_00021255 Zv9_00021250 Zv9_00021252 Zv9_00021249 Zv9_00021253 Zv9_00021254 Zv9_00021251	3.8072	2.32726	1.9322	2.01911	1.68994	8.03176	26.2996	40.3959		pi.1[2961]	0.6944	0.2292	0.005338	0.1291	0.7459	0.9802	3001	5000		beta.i[2961]	0.0008391	0.03109	0.0004241	-0.06207	0.0006962	0.06125	3001	5000
Zv9_00033505	1.42057	1	15.4082	23.8168	7.52699	5.89913	6.56552	3.07557		pi.1[4658]	0.6922	0.2403	0.006302	0.1291	0.7413	0.9906	3001	5000		beta.i[4658]	0.0001499	0.03176	0.0005113	-0.06275	0.0007056	0.06223	3001	5000
Zv9_00033842	1.925	2.24143	6.47633	20.9254	8.93545	7.27092	6.14249	4.42055		pi.1[4714]	0.71	0.2397	0.005801	0.1292	0.7673	0.9934	3001	5000		beta.i[4714]	0.001373	0.03151	0.0004087	-0.05906	0.001301	0.06348	3001	5000
Zv9_00055584 Zv9_00055585 Zv9_00055583	17.3928	21.5394	27.2309	20.8992	2.37193	3.40989	3.18983	3.56692		pi.1[7708]	0.5438	0.1843	0.003013	0.1292	0.5653	0.8322	3001	5000		beta.i[7708]	0.001339	0.03184	0.0004312	-0.06096	0.001658	0.06371	3001	5000
Zv9_00002553 Zv9_00002555 Zv9_00002556 Zv9_00002554 Zv9_00002557	34.2195	11.6875	13.3275	12.3192	8.94097	9.66803	7.93858	4.44682		pi.1[368]	0.5131	0.1703	0.002768	0.1294	0.5328	0.7847	3001	5000		beta.i[368]	0.002315	0.03144	0.0004836	-0.05914	0.002438	0.06371	3001	5000
Zv9_00011243 Zv9_00011244	1.37996	2.01072	1.69245	3.21384	8.65818	8.48134	10.2367	24.7432		pi.1[1612]	0.7286	0.2387	0.004926	0.1295	0.7908	0.9934	3001	5000		beta.i[1612]	0.0009239	0.03206	0.0005268	-0.06187	0.0006349	0.06298	3001	5000
Zv9_00056808 Zv9_00056807 Zv9_00056806	127.532	38.5492	12.4208	5.50864	5.78303	9.93131	10.5144	11.5018		pi.1[7865]	0.4553	0.151	0.002565	0.1295	0.4687	0.712	3001	5000		beta.i[7865]	0.003283	0.03114	0.0004761	-0.05895	0.003667	0.06379	3001	5000
Zv9_00046953	1.85221	1.15888	21.5651	31.8509	22.9412	3.98752	1.20033	1.0525		pi.1[6546]	0.6781	0.2381	0.00543	0.1296	0.7262	0.9886	3001	5000		beta.i[6546]	0.0002454	0.03212	0.0005197	-0.06327	0.0001564	0.06302	3001	5000
Zv9_00050545	40.404	3.26963	8.21836	13.0344	22.0874	13.0484	12.695	9.53324		pi.1[7053]	0.4964	0.1703	0.002875	0.1296	0.5144	0.7762	3001	5000		beta.i[7053]	0.003248	0.03199	0.0004238	-0.05802	0.002813	0.06754	3001	5000
Zv9_00037978 Zv9_00037977	38.7747	25.8743	8.37696	8.21679	5.47048	8.32938	9.32755	9.36074		pi.1[5287]	0.505	0.1729	0.00305	0.1298	0.5255	0.7871	3001	5000		beta.i[5287]	0.002597	0.0314	0.0004354	-0.05794	0.002946	0.06463	3001	5000
Zv9_00004682 Zv9_00004683	85.435	53.2133	17.1433	11.2074	8.56408	9.14247	1	1		pi.1[679]	0.4606	0.1548	0.002434	0.1301	0.4712	0.7252	3001	5000		beta.i[679]	0.002928	0.03151	0.0004567	-0.05844	0.002753	0.06447	3001	5000
Zv9_00000614 Zv9_00000613 Zv9_00000612	135.695	56.9001	20.6103	1	15.6542	13.4244	9.61808	6.76582		pi.1[96]	0.4421	0.1482	0.002157	0.1302	0.4521	0.7006	3001	5000		beta.i[96]	0.002347	0.03089	0.0005614	-0.05855	0.00279	0.06187	3001	5000
Zv9_00023102	1.21554	1.0055	7.42008	40.8219	143.026	2.10136	1.5218	1.1946		pi.1[3214]	0.6419	0.2362	0.003751	0.1303	0.6749	0.9805	3001	5000		beta.i[3214]	0.0007457	0.03099	0.0005272	-0.05979	0.0006045	0.06036	3001	5000
Zv9_00006591	1.53272	1.40115	17.0137	13.7351	8.07389	7.9571	6.1715	3.31412		pi.1[922]	0.6964	0.2391	0.005648	0.1304	0.7498	0.9877	3001	5000		beta.i[922]	0.0003279	0.0312	0.0005298	-0.06046	0.0001483	0.062	3001	5000
Zv9_00014154 Zv9_00014152 Zv9_00014155	51.4009	17.4322	25.6641	37.9029	9.65942	1.95225	2.04239	1.0202		pi.1[1968]	0.484	0.161	0.002453	0.1304	0.4997	0.7617	3001	5000		beta.i[1968]	0.00288	0.03123	0.000471	-0.05842	0.002966	0.06336	3001	5000
Zv9_00025510	1.01341	1.01186	1.01563	1.08337	12.706	11.2016	12.3976	31.0693		pi.1[3522]	0.7142	0.238	0.005557	0.1309	0.7776	0.992	3001	5000		beta.i[3522]	0.0003103	0.03155	0.0005305	-0.062	0.0002516	0.06263	3001	5000
Zv9_00016998 Zv9_00016997	1.47867	1.27154	1.52746	1.63859	1.51723	8.98773	14.9694	66.1536		pi.1[2360]	0.7527	0.2394	0.006232	0.131	0.8251	0.9947	3001	5000		beta.i[2360]	0.001146	0.03139	0.0004831	-0.06134	0.001256	0.06199	3001	5000
Zv9_00013650	14.5969	23.2794	21.1575	6.36002	4.72612	4.61037	3.59057	8.31046		pi.1[1905]	0.5567	0.1908	0.002969	0.1311	0.5819	0.852	3001	5000		beta.i[1905]	0.001607	0.03116	0.0004636	-0.05942	0.00129	0.06194	3001	5000
Zv9_00028735 Zv9_00028736 Zv9_00028734 Zv9_00028737 Zv9_00028740 Zv9_00028738	1.14972	1.1235	1.73131	2.89428	4.43631	20.2581	10.2513	23.2828		pi.1[3972]	0.7241	0.2394	0.005283	0.1311	0.7868	0.9919	3001	5000		beta.i[3972]	0.0008804	0.03153	0.0004794	-0.06037	0.001162	0.06262	3001	5000
Zv9_00046289 Zv9_00046295 Zv9_00046294 Zv9_00046292 Zv9_00046293	245.796	35.588	21.3986	18.807	7.72504	4.37279	5.78938	3.27102		pi.1[6453]	0.4255	0.1398	0.0021	0.1311	0.4354	0.6733	3001	5000		beta.i[6453]	0.003942	0.03168	0.0005692	-0.0579	0.003801	0.06663	3001	5000
Zv9_00054015 Zv9_00054014 Zv9_00054013	38.7432	11.5748	5.48553	10.8463	27.3758	12.5794	9.41452	3.72337		pi.1[7523]	0.5013	0.1693	0.002539	0.1311	0.517	0.7774	3001	5000		beta.i[7523]	0.002366	0.03181	0.000466	-0.06024	0.002479	0.06349	3001	5000
Zv9_00007621	2.31491	2.04785	2.28848	1.32108	1.70118	35.216	27.3797	13.8829		pi.1[1066]	0.6953	0.2371	0.00551	0.1312	0.7494	0.9884	3001	5000		beta.i[1066]	0.0006645	0.0314	0.0004722	-0.05935	0.0003178	0.06414	3001	5000
Zv9_00008992	1.64837	1.29887	22.0458	32.6913	11.7939	4.47459	3.34046	1.34858		pi.1[1287]	0.6905	0.2349	0.003963	0.1312	0.7388	0.9879	3001	5000		beta.i[1287]	0.0004226	0.03188	0.0004608	-0.0624	0.0001975	0.0632	3001	5000
Zv9_00041647 Zv9_00041646	1.09072	1.13016	1.17742	3.43868	13.1465	14.5706	12.0704	8.61966		pi.1[5770]	0.7112	0.2383	0.005366	0.1312	0.7721	0.9901	3001	5000		beta.i[5770]	0.0004157	0.03136	0.000347	-0.06159	0.0007231	0.06208	3001	5000
Zv9_00050942 Zv9_00050947 Zv9_00050946 Zv9_00050943 Zv9_00050945 Zv9_00050944	16.6661	16.5905	24.8702	11.2178	5.97655	3.91995	3.83184	4.68063		pi.1[7110]	0.5497	0.183	0.003171	0.1312	0.5703	0.8366	3001	5000		beta.i[7110]	0.00264	0.03121	0.0004644	-0.05796	0.002308	0.06411	3001	5000
Zv9_00052985	1.2023	1.26853	5.17484	6.32822	16.7749	7.72766	8.27784	9.74405		pi.1[7377]	0.7196	0.2358	0.004891	0.1312	0.7826	0.9923	3001	5000		beta.i[7377]	0.0005305	0.03155	0.0004269	-0.06098	0.0004157	0.06177	3001	5000
Zv9_00055975 Zv9_00055976	54.8127	15.6652	10.6398	13.0931	12.434	12.3428	8.64812	2.39733		pi.1[7759]	0.4887	0.1615	0.002631	0.1312	0.5056	0.7607	3001	5000		beta.i[7759]	0.002844	0.03177	0.0004346	-0.05986	0.002951	0.06328	3001	5000
Zv9_00055793 Zv9_00055795 Zv9_00055794	1.7028	1.1962	1.19003	1.29098	1.94543	19.3676	28.3719	26.9939		pi.1[7738]	0.7339	0.229	0.004863	0.1313	0.7921	0.9935	3001	5000		beta.i[7738]	0.0004789	0.03214	0.0004418	-0.06192	0.0006161	0.06363	3001	5000
Zv9_00025793 Zv9_00025794 Zv9_00025796 Zv9_00025795 Zv9_00025792 Zv9_00025797	1.49195	2.40132	2.39823	2.20055	1.55545	28.6787	18.6343	19.266		pi.1[3562]	0.7188	0.2378	0.005301	0.1314	0.7812	0.9919	3001	5000		beta.i[3562]	0.0001283	0.03163	0.0004604	-0.06195	9.816e-05	0.06056	3001	5000
Zv9_00000422 Zv9_00000421 Zv9_00000423	1.13119	1.2239	1.24342	1.23568	1.17519	9.90646	19.0156	71.0966		pi.1[70]	0.74	0.2362	0.005314	0.1315	0.8069	0.9936	3001	5000		beta.i[70]	0.001018	0.03127	0.0004533	-0.0595	0.001024	0.06269	3001	5000
Zv9_00038096	1.05979	1.08203	1.01314	1.04684	10.7907	13.068	13.2367	19.5273		pi.1[5304]	0.7122	0.2393	0.004887	0.1316	0.7692	0.9916	3001	5000		beta.i[5304]	-4.889e-05	0.0314	0.0005034	-0.06184	-0.0005377	0.06203	3001	5000
Zv9_00019624 Zv9_00019623 Zv9_00019625	41.8222	44.4722	13.8431	9.07462	5.04852	5.17903	5.90654	6.15418		pi.1[2724]	0.5058	0.1669	0.00248	0.1317	0.523	0.7805	3001	5000		beta.i[2724]	0.002782	0.03181	0.0004825	-0.05899	0.002564	0.06533	3001	5000
Zv9_00006984 Zv9_00006985 Zv9_00006983	5.00367	9.92731	18.7877	21.198	5.89507	3.58308	3.20446	3.4431		pi.1[980]	0.6463	0.2107	0.004268	0.1319	0.6855	0.9389	3001	5000		beta.i[980]	0.00136	0.03163	0.0004214	-0.05957	0.000992	0.06402	3001	5000
Zv9_00016981	122.804	18.4227	11.6281	5.87002	7.46668	13.1637	14.952	13.0435		pi.1[2358]	0.4543	0.15	0.002179	0.1319	0.4669	0.7112	3001	5000		beta.i[2358]	0.003395	0.03161	0.0005511	-0.05927	0.00366	0.06492	3001	5000
Zv9_00055744	136.651	44.5101	15.1489	11.0752	9.88527	6.45557	6.50233	4.53432		pi.1[7734]	0.452	0.1463	0.002197	0.1322	0.4649	0.6989	3001	5000		beta.i[7734]	0.004256	0.03167	0.0006215	-0.05725	0.00432	0.06479	3001	5000
Zv9_00016577 Zv9_00016578	29.6198	19.9364	10.4076	6.44333	3.8055	6.57176	11.4308	12.4115		pi.1[2299]	0.5186	0.1759	0.002633	0.1324	0.5398	0.8043	3001	5000		beta.i[2299]	0.002446	0.0317	0.0005233	-0.05931	0.002631	0.06365	3001	5000
Zv9_00040699 Zv9_00040700 Zv9_00040702 Zv9_00040694 Zv9_00040701 Zv9_00040695 Zv9_00040698 Zv9_00040696 Zv9_00040697	37.4735	17.4072	10.3163	3.70875	2.99113	11.2183	16.4581	24.1929		pi.1[5646]	0.5136	0.1691	0.002356	0.1326	0.5314	0.7922	3001	5000		beta.i[5646]	0.002775	0.03173	0.0005402	-0.05982	0.003542	0.06476	3001	5000
Zv9_00048541 Zv9_00048540	52.4107	26.7831	22.7148	7.70901	4.76394	6.82016	6.7865	6.66274		pi.1[6783]	0.4936	0.166	0.002604	0.1326	0.5079	0.7712	3001	5000		beta.i[6783]	0.002646	0.03165	0.0005359	-0.05873	0.002266	0.06301	3001	5000
Zv9_00000171 Zv9_00000172 Zv9_00000169 Zv9_00000170	1.05557	1.16607	1.72086	34.9866	37.2171	6.34477	4.68979	4.33081		pi.1[29]	0.6828	0.2343	0.004304	0.1327	0.727	0.9873	3001	5000		beta.i[29]	0.0006675	0.03222	0.0004756	-0.06011	0.0003087	0.06515	3001	5000
Zv9_00007935 Zv9_00007936	26.2894	26.4861	7.65108	4.94796	7.23863	7.79356	8.04969	9.31012		pi.1[1116]	0.5286	0.1763	0.002815	0.1329	0.55	0.8118	3001	5000		beta.i[1116]	0.001935	0.03116	0.0004038	-0.05844	0.001784	0.06197	3001	5000
Zv9_00020340 Zv9_00020338 Zv9_00020337 Zv9_00020339	5.24066	3.80341	3.02639	4.01157	4.19875	5.645	10.1671	69.8317		pi.1[2835]	0.6668	0.2233	0.004334	0.1329	0.7165	0.9565	3001	5000		beta.i[2835]	0.001715	0.03147	0.0004926	-0.06098	0.001625	0.06384	3001	5000
Zv9_00029544 Zv9_00029545	1	1	1	1	1	779.452	286.142	1.28751		pi.1[4087]	0.5587	0.208	0.003149	0.133	0.5641	0.9409	3001	5000		beta.i[4087]	0.0004699	0.03175	0.0008056	-0.06138	0.0001821	0.06368	3001	5000
Zv9_00015137	1.50841	1.33833	2.16555	2.7787	5.54279	7.3064	9.19477	67.4885		pi.1[2097]	0.7491	0.2336	0.005636	0.1331	0.8133	0.9943	3001	5000		beta.i[2097]	0.001312	0.03156	0.0004589	-0.06045	0.001238	0.06305	3001	5000
Zv9_00020173 Zv9_00020172 Zv9_00020174	1.68312	2.94024	5.41938	4.10059	3.47195	13.9926	14.9329	12.6006		pi.1[2804]	0.7205	0.2327	0.005563	0.1331	0.7779	0.9924	3001	5000		beta.i[2804]	0.0003675	0.03185	0.0004892	-0.06104	-9.272e-05	0.0633	3001	5000
Zv9_00047719	1.09933	1.09488	1.02543	1.16213	6.1413	24.0599	18.1103	14.6297		pi.1[6656]	0.7215	0.2341	0.005634	0.1334	0.7807	0.9933	3001	5000		beta.i[6656]	0.000929	0.03177	0.0004871	-0.06138	0.001224	0.06377	3001	5000
Zv9_00042252 Zv9_00042250 Zv9_00042247 Zv9_00042251 Zv9_00042248 Zv9_00042249	84.4916	29.2461	12.3286	6.29867	17.3283	9.84617	6.70606	4.54244		pi.1[5858]	0.4666	0.1546	0.002059	0.1335	0.4794	0.733	3001	5000		beta.i[5858]	0.003779	0.03189	0.0004953	-0.06065	0.004238	0.06574	3001	5000
Zv9_00030507 Zv9_00030505 Zv9_00030508 Zv9_00030504	24.9286	15.8025	21.5072	9.96265	4.47343	5.25056	5.71963	7.34762		pi.1[4219]	0.5297	0.1753	0.002719	0.1336	0.5504	0.8055	3001	5000		beta.i[4219]	0.002502	0.03213	0.0004408	-0.06038	0.002455	0.06479	3001	5000
Zv9_00009069 Zv9_00009070	2.66096	4.53646	18.1375	20.8513	6.89081	4.43802	3.58253	2.53413		pi.1[1306]	0.6944	0.2301	0.00542	0.1337	0.7421	0.9864	3001	5000		beta.i[1306]	0.001246	0.03191	0.0004945	-0.06122	0.001208	0.06303	3001	5000
Zv9_00030208	1.05702	1.00723	1.01156	1.0568	16.5728	16.087	8.23208	36.1869		pi.1[4175]	0.7252	0.2337	0.005106	0.134	0.7843	0.9905	3001	5000		beta.i[4175]	0.0005346	0.03131	0.0004365	-0.06054	9.746e-05	0.06271	3001	5000
Zv9_00030399 Zv9_00030400	62.4419	15.2694	6.91752	7.19343	13.3384	13.4093	13.8581	9.76057		pi.1[4207]	0.485	0.1611	0.002791	0.134	0.4994	0.7544	3001	5000		beta.i[4207]	0.002225	0.03128	0.000555	-0.0578	0.001982	0.06406	3001	5000
Zv9_00009037	3.12516	1.21279	58.9105	56.0471	9.03464	2.47464	1.95297	1.28247		pi.1[1296]	0.6487	0.2257	0.004113	0.1342	0.682	0.9765	3001	5000		beta.i[1296]	0.001158	0.03177	0.000571	-0.06066	0.001944	0.0628	3001	5000
Zv9_00018245 Zv9_00018244 Zv9_00018249 Zv9_00018248 Zv9_00018243 Zv9_00018246	3.78414	5.40609	17.7186	24.7884	4.76662	4.17847	3.78596	4.29466		pi.1[2535]	0.6682	0.222	0.003974	0.1344	0.7086	0.9702	3001	5000		beta.i[2535]	0.001318	0.03158	0.00044	-0.06093	0.001096	0.06137	3001	5000
Zv9_00057393 Zv9_00057392	38.8439	14.9992	6.02747	7.32793	6.59393	11.6753	10.0143	21.224		pi.1[7959]	0.5134	0.1684	0.00267	0.1346	0.5308	0.7812	3001	5000		beta.i[7959]	0.002847	0.0316	0.0005129	-0.05911	0.003052	0.0636	3001	5000
Zv9_00016757	25.0348	25.0759	24.0209	5.83964	7.37345	4.37436	4.26705	5.79755		pi.1[2323]	0.5225	0.1754	0.002887	0.1348	0.5408	0.8056	3001	5000		beta.i[2323]	0.002427	0.03155	0.0004344	-0.05909	0.002386	0.06562	3001	5000
Zv9_00017534 Zv9_00017536 Zv9_00017535 Zv9_00017532 Zv9_00017533	93.5022	41.2174	7.8801	4.8384	10.2586	9.45949	9.554	8.80884		pi.1[2434]	0.4678	0.1539	0.002053	0.1348	0.4786	0.7303	3001	5000		beta.i[2434]	0.002998	0.03158	0.0005259	-0.05915	0.002992	0.06518	3001	5000
Zv9_00020918 Zv9_00020919	125.223	57.0881	1	65.842	6.83651	14.8817	19.704	24.4688		pi.1[2917]	0.4435	0.1485	0.002476	0.1349	0.453	0.7043	3001	5000		beta.i[2917]	0.004103	0.03137	0.0006502	-0.0563	0.003513	0.06574	3001	5000
Zv9_00028248 Zv9_00028247 Zv9_00028245 Zv9_00028249 Zv9_00028246 Zv9_00028251 Zv9_00028250 Zv9_00028252	42.8516	16.4178	17.0397	6.74921	1.28498	6.43725	21.1633	28.6175		pi.1[3897]	0.5011	0.1691	0.002702	0.1349	0.519	0.7744	3001	5000		beta.i[3897]	0.003004	0.03118	0.0005403	-0.05932	0.002907	0.06568	3001	5000
Zv9_00004897	1	1.03008	1.00963	1.01705	1.38446	13.5973	17.7193	44.4479		pi.1[711]	0.7285	0.2359	0.005369	0.1351	0.7902	0.9909	3001	5000		beta.i[711]	0.0004565	0.03095	0.0005453	-0.05976	0.0004969	0.06062	3001	5000
Zv9_00028236 Zv9_00028235	1.19917	1.02179	4.61786	12.508	15.2483	6.90003	7.68166	4.54374		pi.1[3895]	0.71	0.2389	0.005576	0.1351	0.7673	0.9908	3001	5000		beta.i[3895]	0.0009969	0.03136	0.000507	-0.0586	0.001256	0.06246	3001	5000
Zv9_00015689 Zv9_00015686 Zv9_00015687 Zv9_00015690 Zv9_00015688 Zv9_00015685 Zv9_00015684	33.9319	23.7427	12.2999	3.31749	8.23067	9.54274	10.0717	13.8908		pi.1[2168]	0.5168	0.1696	0.002778	0.1352	0.5346	0.7975	3001	5000		beta.i[2168]	0.004051	0.03181	0.0004204	-0.05794	0.003976	0.06609	3001	5000
Zv9_00032750 Zv9_00032749	31.5811	5.82831	8.73138	12.7557	23.7109	10.7533	10.0313	4.95157		pi.1[4541]	0.516	0.1713	0.002815	0.1352	0.5362	0.7925	3001	5000		beta.i[4541]	0.002451	0.03184	0.0004893	-0.06086	0.002094	0.0662	3001	5000
Zv9_00032753	69.6959	47.0562	12.6312	7.36925	4.95092	5.91386	6.59036	13.8845		pi.1[4542]	0.4865	0.1573	0.002276	0.1352	0.5018	0.7453	3001	5000		beta.i[4542]	0.001844	0.03226	0.0004906	-0.06115	0.002075	0.06518	3001	5000
Zv9_00050162 Zv9_00050160 Zv9_00050161	28.8126	19.3177	22.5535	10.1933	4.17824	6.11069	6.2734	5.22953		pi.1[6992]	0.5249	0.177	0.002744	0.1353	0.5452	0.8077	3001	5000		beta.i[6992]	0.003283	0.03163	0.0005418	-0.05802	0.003841	0.06487	3001	5000
Zv9_00034466 Zv9_00034467	1	1	36.9363	56.2166	45.3337	1	1	1		pi.1[4793]	0.6539	0.2326	0.004709	0.1354	0.6854	0.9858	3001	5000		beta.i[4793]	0.0001278	0.03132	0.0004888	-0.06146	0.0004739	0.06146	3001	5000
Zv9_00023410 Zv9_00023408 Zv9_00023409	34.3084	30.069	8.71722	4.27618	10.6942	8.9697	7.59814	7.05425		pi.1[3249]	0.5172	0.1694	0.002568	0.1356	0.5344	0.7927	3001	5000		beta.i[3249]	0.001929	0.03174	0.0005091	-0.06115	0.002605	0.06404	3001	5000
Zv9_00028253 Zv9_00028254	18.5853	30.073	24.225	6.80078	5.47121	5.43326	2.8678	1.82037		pi.1[3898]	0.5367	0.183	0.00313	0.1357	0.5543	0.8358	3001	5000		beta.i[3898]	0.002513	0.0316	0.0004749	-0.05771	0.002429	0.06481	3001	5000
Zv9_00031555 Zv9_00031551 Zv9_00031552 Zv9_00031556 Zv9_00031550 Zv9_00031554 Zv9_00031549 Zv9_00031553	1	1.0043	1.03822	1.09291	4.46	23.367	21.6345	19.0806		pi.1[4381]	0.72	0.2336	0.005493	0.1357	0.7766	0.9915	3001	5000		beta.i[4381]	4.906e-05	0.03201	0.0004498	-0.06498	5.064e-05	0.06223	3001	5000
Zv9_00031336	31.7859	9.47777	11.4407	18.1561	2.74496	9.40414	11.5903	31.7241		pi.1[4333]	0.5285	0.1715	0.002644	0.1358	0.5486	0.7991	3001	5000		beta.i[4333]	0.003116	0.03185	0.0004595	-0.05959	0.002566	0.06568	3001	5000
Zv9_00058314	1	1	3.28603	19.6269	14.0377	5.03715	5.05741	14.327		pi.1[8114]	0.7094	0.2323	0.005294	0.1358	0.7608	0.9905	3001	5000		beta.i[8114]	0.0005406	0.0312	0.0005047	-0.0588	8.722e-05	0.06143	3001	5000
Zv9_00010905	1	1	1.33464	1	1	5.62475	20.0056	90.3415		pi.1[1567]	0.7357	0.2372	0.005236	0.1359	0.8021	0.9925	3001	5000		beta.i[1567]	0.0002421	0.03178	0.0005336	-0.06338	0.000617	0.062	3001	5000
Zv9_00014401 Zv9_00014399 Zv9_00014400 Zv9_00014402 Zv9_00014398	6.4455	6.72132	4.89022	5.53004	2.65185	7.11371	10.147	40.0327		pi.1[2002]	0.6382	0.2098	0.003983	0.136	0.6767	0.9315	3001	5000		beta.i[2002]	0.001539	0.0309	0.0004382	-0.06003	0.001504	0.06198	3001	5000
Zv9_00052992 Zv9_00052991 Zv9_00052990	67.9624	24.9886	28.4909	14.4958	5.86662	6.04007	4.58253	4.5256		pi.1[7378]	0.4865	0.1595	0.002627	0.136	0.5021	0.7493	3001	5000		beta.i[7378]	0.002639	0.03142	0.0004865	-0.05894	0.002591	0.06438	3001	5000
Zv9_00055616	2.93472	2.19279	2.75185	1.81478	1.33747	11.3119	15.9716	51.9432		pi.1[7713]	0.7167	0.2275	0.005142	0.1361	0.7697	0.9873	3001	5000		beta.i[7713]	0.0008881	0.03202	0.0003994	-0.06126	0.0005833	0.06365	3001	5000
Zv9_00010332	1.62257	5.52323	5.8988	12.6421	6.03965	3.49248	5.81293	19.0927		pi.1[1498]	0.7238	0.2337	0.005657	0.1366	0.7833	0.9896	3001	5000		beta.i[1498]	0.000883	0.03185	0.0004685	-0.06198	0.0008793	0.06113	3001	5000
Zv9_00009051	1.70308	1.30794	20.7409	42.6507	12.8158	4.09547	3.08397	1.61637		pi.1[1300]	0.6884	0.2318	0.004613	0.1367	0.7352	0.9869	3001	5000		beta.i[1300]	0.0002455	0.03176	0.0005709	-0.0624	0.0005303	0.06242	3001	5000
Zv9_00031658 Zv9_00031659 Zv9_00031657	1.01027	1	1.55831	1.70904	7.72015	7.18384	13.1322	27.4144		pi.1[4395]	0.7312	0.2364	0.005045	0.137	0.7962	0.9932	3001	5000		beta.i[4395]	0.0002408	0.03143	0.0005061	-0.06157	0.001058	0.06233	3001	5000
Zv9_00054796 Zv9_00054797	140.31	49.6217	17.4218	12.4786	6.2385	5.73377	4.76538	2.20456		pi.1[7606]	0.4461	0.1469	0.002533	0.1373	0.4583	0.7015	3001	5000		beta.i[7606]	0.003676	0.03181	0.0004627	-0.05899	0.003695	0.06605	3001	5000
Zv9_00046074 Zv9_00046075	46.4592	21.3113	11.6246	10.0179	6.41588	8.58051	8.73106	10.812		pi.1[6424]	0.5046	0.1637	0.002459	0.1374	0.5203	0.7714	3001	5000		beta.i[6424]	0.003335	0.03126	0.0005047	-0.05809	0.003602	0.06458	3001	5000
Zv9_00000390	27.4197	24.829	5.83616	4.95545	10.7854	5.94516	7.02289	16.7819		pi.1[65]	0.524	0.1742	0.003029	0.1375	0.5453	0.8044	3001	5000		beta.i[65]	0.002497	0.03158	0.0004076	-0.05877	0.002331	0.06408	3001	5000
Zv9_00002645 Zv9_00002646	163.7	44.7203	24.6022	10.1577	4.3151	7.07304	6.6808	6.80826		pi.1[376]	0.451	0.1441	0.002451	0.1378	0.4625	0.6981	3001	5000		beta.i[376]	0.003483	0.03162	0.0005066	-0.05772	0.003508	0.06782	3001	5000
Zv9_00051051	1713.09	125.295	43.5796	31.3911	6.4007	1.40442	1.15911	1.12617		pi.1[7120]	0.3793	0.1153	0.001678	0.1385	0.3841	0.592	3001	5000		beta.i[7120]	0.003642	0.0318	0.001076	-0.05796	0.003812	0.0679	3001	5000
Zv9_00016277	106.793	15.3397	13.0836	17.2394	6.67869	11.1964	9.23396	26.0432		pi.1[2262]	0.4754	0.1512	0.002556	0.1386	0.4914	0.7305	3001	5000		beta.i[2262]	0.003079	0.03157	0.0005446	-0.06028	0.003386	0.06414	3001	5000
Zv9_00039821 Zv9_00039823 Zv9_00039822	1	1.00395	1	1	1.01479	4.66866	35.7174	59.9087		pi.1[5527]	0.729	0.237	0.005746	0.1387	0.7937	0.9937	3001	5000		beta.i[5527]	0.0009356	0.03236	0.0004542	-0.06299	0.0009562	0.06537	3001	5000
Zv9_00047641 Zv9_00047639 Zv9_00047638 Zv9_00047640	1.00955	1.0046	1.02535	1.08961	1.21937	6.78732	22.1094	64.278		pi.1[6645]	0.7329	0.2402	0.006131	0.1387	0.8018	0.9935	3001	5000		beta.i[6645]	-0.0004636	0.03129	0.0004563	-0.06114	-7.086e-05	0.06155	3001	5000
Zv9_00033574	2.05292	1.94253	24.1452	22.6521	7.58052	4.50675	4.95998	3.80292		pi.1[4675]	0.7002	0.23	0.004447	0.1388	0.7503	0.9874	3001	5000		beta.i[4675]	0.00138	0.03096	0.0004533	-0.06059	0.001737	0.06091	3001	5000
Zv9_00053842 Zv9_00053840 Zv9_00053841	34.7658	20.3602	10.3196	3.39003	4.96014	9.91224	11.699	14.7117		pi.1[7498]	0.513	0.1721	0.002428	0.1388	0.5328	0.793	3001	5000		beta.i[7498]	0.003118	0.03144	0.0004807	-0.05821	0.002782	0.06621	3001	5000
Zv9_00047006 Zv9_00047004 Zv9_00047007 Zv9_00047005	42.1065	38.1342	30.9092	33.2036	1	13.154	11.4531	1		pi.1[6555]	0.4892	0.1631	0.002315	0.1389	0.5052	0.7621	3001	5000		beta.i[6555]	0.002693	0.03185	0.0005469	-0.06009	0.002405	0.06462	3001	5000
Zv9_00018335 Zv9_00018334 Zv9_00018336	1.97425	1.8479	2.62052	3.22211	1.6431	14.8351	18.7193	32.403		pi.1[2546]	0.7401	0.2336	0.00608	0.139	0.8034	0.9936	3001	5000		beta.i[2546]	0.001577	0.03183	0.0005131	-0.06097	0.001882	0.06488	3001	5000
Zv9_00020032 Zv9_00020031 Zv9_00020033	3.11072	2.67109	5.62114	5.91748	3.4013	9.14738	10.3899	23.4375		pi.1[2777]	0.7131	0.2308	0.005028	0.139	0.7695	0.9879	3001	5000		beta.i[2777]	0.001568	0.03186	0.000492	-0.05989	0.001842	0.06556	3001	5000
Zv9_00056160	46.5435	26.1035	7.48019	9.44564	16.7814	11.0099	8.35448	2.94738		pi.1[7783]	0.4986	0.1636	0.002635	0.139	0.5159	0.7667	3001	5000		beta.i[7783]	0.002774	0.03199	0.0004653	-0.05887	0.002107	0.0656	3001	5000
Zv9_00012413 Zv9_00012414	40.374	29.4385	38.8933	24.2847	2.57197	3.31064	2.76491	2.1056		pi.1[1760]	0.5021	0.1664	0.002709	0.1395	0.5175	0.7778	3001	5000		beta.i[1760]	0.002986	0.03103	0.0004816	-0.05887	0.003053	0.06366	3001	5000
Zv9_00043499 Zv9_00043498 Zv9_00043501 Zv9_00043500 Zv9_00043497	26.3527	17.6422	19.1024	7.18462	8.64511	4.56999	4.54437	6.27597		pi.1[6015]	0.5197	0.1767	0.002866	0.1395	0.5376	0.8062	3001	5000		beta.i[6015]	0.001962	0.03137	0.0004665	-0.05763	0.001348	0.06252	3001	5000
Zv9_00057582	1.03347	1	2.5294	15.059	12.7655	7.07408	5.31418	18.5097		pi.1[8003]	0.7226	0.2322	0.005013	0.1395	0.7806	0.9925	3001	5000		beta.i[8003]	0.000618	0.03121	0.00044	-0.05932	8.698e-05	0.06175	3001	5000
Zv9_00019599 Zv9_00019601 Zv9_00019598 Zv9_00019597 Zv9_00019600	1.04873	1.02842	1.0398	1.03405	1.10337	11.5418	29.5371	39.7208		pi.1[2721]	0.7313	0.236	0.00564	0.1396	0.7978	0.9921	3001	5000		beta.i[2721]	-0.0002167	0.0315	0.0005093	-0.06194	-0.000785	0.06268	3001	5000
Zv9_00020389	33.8	24.1802	41.5957	46.7713	1.98278	1	1	1		pi.1[2842]	0.4988	0.1668	0.002905	0.1397	0.5159	0.7768	3001	5000		beta.i[2842]	0.00208	0.03156	0.0005222	-0.05893	0.002112	0.06519	3001	5000
Zv9_00019982	2.00616	1.40926	1.55383	3.34386	26.9116	14.9652	9.46622	6.27129		pi.1[2766]	0.7086	0.2345	0.004952	0.1398	0.7633	0.9885	3001	5000		beta.i[2766]	0.0007483	0.03198	0.0005292	-0.06148	0.001157	0.06271	3001	5000
Zv9_00053687 Zv9_00053686	1.22724	1.44706	1.65301	1.29985	1.13831	23.203	30.6395	24.1972		pi.1[7476]	0.7228	0.2333	0.005594	0.1399	0.7767	0.9924	3001	5000		beta.i[7476]	0.0007681	0.0318	0.0005312	-0.06293	0.0003566	0.0623	3001	5000
Zv9_00023468	1.11155	1.058	1.02145	1.29364	16.6953	14.7151	20.8537	9.00573		pi.1[3255]	0.7102	0.2356	0.004196	0.1402	0.7605	0.9907	3001	5000		beta.i[3255]	0.0002631	0.03193	0.000491	-0.06322	0.0008124	0.06492	3001	5000
Zv9_00003046	35.5834	18.2867	23.0221	12.6521	2.2344	7.68449	10.6012	13.8588		pi.1[437]	0.5213	0.1682	0.002831	0.1404	0.5405	0.7887	3001	5000		beta.i[437]	0.002591	0.03165	0.0004252	-0.06009	0.002302	0.06394	3001	5000
Zv9_00004878	1.05303	1.01076	1.02579	1.03528	1.21555	21.6621	25.1144	21.6738		pi.1[708]	0.7032	0.2345	0.004278	0.1404	0.7586	0.9901	3001	5000		beta.i[708]	-0.0007098	0.03169	0.0004294	-0.06345	-0.001191	0.0619	3001	5000
Zv9_00031611 Zv9_00031608 Zv9_00031612 Zv9_00031610 Zv9_00031609	39.0115	19.4082	17.7508	16.2476	3.23618	6.68401	7.38789	10.5829		pi.1[4389]	0.5094	0.1641	0.00252	0.1405	0.5261	0.7751	3001	5000		beta.i[4389]	0.002756	0.03186	0.0004612	-0.06078	0.003168	0.06495	3001	5000
Zv9_00013569	43.8279	19.4017	21.5404	9.85026	6.59128	6.60788	6.40124	6.58805		pi.1[1894]	0.5056	0.167	0.002471	0.1406	0.5252	0.7859	3001	5000		beta.i[1894]	0.002501	0.03162	0.0004418	-0.06015	0.003026	0.06491	3001	5000
Zv9_00018350 Zv9_00018349	6.42282	5.10865	2.24211	2.20405	9.96723	14.7766	18.8236	12.6885		pi.1[2553]	0.6277	0.2094	0.004189	0.1406	0.6605	0.9285	3001	5000		beta.i[2553]	0.001625	0.03127	0.0004514	-0.0603	0.001989	0.062	3001	5000
Zv9_00012747	1.43656	1.65318	6.99283	16.0968	10.0036	6.14859	6.67205	6.20916		pi.1[1800]	0.723	0.2312	0.005396	0.1407	0.7802	0.9916	3001	5000		beta.i[1800]	0.0005588	0.03186	0.0005246	-0.06115	0.0002125	0.06311	3001	5000
Zv9_00017097 Zv9_00017098 Zv9_00017099 Zv9_00017100 Zv9_00017096	1.63295	1.21761	2.05608	3.36327	11.1829	10.4909	10.1294	13.6702		pi.1[2375]	0.7112	0.2396	0.005204	0.1407	0.771	0.992	3001	5000		beta.i[2375]	2.593e-05	0.03144	0.0004416	-0.06251	-7.303e-05	0.06108	3001	5000
Zv9_00030166	2.14115	2.60694	3.77589	5.69166	19.6167	7.08449	10.282	8.4284		pi.1[4168]	0.7243	0.2283	0.005584	0.1407	0.7782	0.9915	3001	5000		beta.i[4168]	0.0007955	0.03152	0.0003936	-0.06082	0.0001323	0.06243	3001	5000
Zv9_00034896 Zv9_00034897	19.4094	19.0134	29.3633	30.1816	1.76852	4.98292	5.30392	6.44834		pi.1[4848]	0.5441	0.1796	0.002727	0.1407	0.5663	0.8223	3001	5000		beta.i[4848]	0.002939	0.03117	0.0004581	-0.05879	0.003083	0.06568	3001	5000
Zv9_00025877 Zv9_00025876 Zv9_00025878	1.61679	2.16937	5.9709	12.4083	12.8087	7.53503	6.64613	2.96744		pi.1[3578]	0.7004	0.2375	0.004978	0.1409	0.7534	0.9899	3001	5000		beta.i[3578]	0.000749	0.03132	0.0005091	-0.05982	0.0003709	0.0619	3001	5000
Zv9_00038558 Zv9_00038559	55.6678	22.9004	15.593	8.28827	11.2392	6.51165	5.48246	7.99747		pi.1[5353]	0.4899	0.1617	0.002741	0.1409	0.5037	0.757	3001	5000		beta.i[5353]	0.004027	0.03142	0.0004688	-0.05841	0.004934	0.06557	3001	5000
Zv9_00050265	1.19237	1.29816	1.34298	4.31809	16.1862	27.0062	9.01217	6.377		pi.1[7013]	0.7138	0.2331	0.005149	0.141	0.7696	0.9915	3001	5000		beta.i[7013]	0.000776	0.03212	0.0005087	-0.06195	0.001231	0.06294	3001	5000
Zv9_00021655 Zv9_00021656	1	21.9384	32.4374	1	46.2497	12.9687	11.025	3.96885		pi.1[3014]	0.6525	0.2301	0.004289	0.1411	0.6824	0.9823	3001	5000		beta.i[3014]	0.001301	0.03179	0.0004972	-0.06147	0.001097	0.06348	3001	5000
Zv9_00026845	30.0272	15.7003	28.8111	40.1762	2.63634	4.78984	4.02048	5.82332		pi.1[3708]	0.5145	0.1679	0.002567	0.1411	0.5338	0.7944	3001	5000		beta.i[3708]	0.002536	0.03133	0.0004746	-0.05832	0.003206	0.06366	3001	5000
Zv9_00058068	38.8995	9.50633	4.62562	8.98538	19.1317	11.8231	12.3321	12.2167		pi.1[8077]	0.5116	0.1652	0.002607	0.1414	0.5264	0.7804	3001	5000		beta.i[8077]	0.002474	0.03131	0.0004652	-0.05973	0.002408	0.06551	3001	5000
Zv9_00048040 Zv9_00048039 Zv9_00048041	1.79985	2.29829	1.39535	3.05228	10.9811	16.0752	14.4894	7.73569		pi.1[6701]	0.7146	0.2304	0.005053	0.1416	0.7714	0.9877	3001	5000		beta.i[6701]	0.001908	0.03197	0.0004786	-0.06158	0.001819	0.06416	3001	5000
Zv9_00002029 Zv9_00002027 Zv9_00002030 Zv9_00002028	1.1571	1.06958	5.13948	6.07953	2.62875	19.6351	13.5754	20.7894		pi.1[286]	0.7277	0.2337	0.00478	0.1418	0.7893	0.9917	3001	5000		beta.i[286]	0.0004435	0.03157	0.0004233	-0.05965	-0.000185	0.06076	3001	5000
Zv9_00056294	1	1	1	1	1.16675	22.085	24.9324	26.2462		pi.1[7801]	0.7029	0.2367	0.004775	0.1419	0.7576	0.9897	3001	5000		beta.i[7801]	0.0001075	0.03176	0.0004459	-0.06363	-0.0001774	0.06117	3001	5000
Zv9_00042042 Zv9_00042044 Zv9_00042041 Zv9_00042043	1.34284	1.23833	1.5247	1.11021	2.33502	25.7694	25.2792	16.5419		pi.1[5825]	0.7199	0.2314	0.005164	0.142	0.7739	0.9931	3001	5000		beta.i[5825]	-0.0005815	0.0317	0.0004562	-0.06279	-0.000235	0.06119	3001	5000
Zv9_00031177 Zv9_00031178	1.63526	3.25903	3.70577	12.1332	14.2673	6.49509	4.89648	3.68509		pi.1[4310]	0.7009	0.2351	0.005681	0.1424	0.7519	0.9895	3001	5000		beta.i[4310]	0.0008757	0.03178	0.000459	-0.06139	0.00114	0.0631	3001	5000
Zv9_00047937 Zv9_00047938	2.30922	4.34095	5.32086	3.42775	1.21685	15.7974	24.426	17.9483		pi.1[6687]	0.7074	0.2293	0.005966	0.1424	0.7578	0.9897	3001	5000		beta.i[6687]	0.0009911	0.03158	0.0004771	-0.0621	0.001643	0.06127	3001	5000
Zv9_00029205	72.4429	20.938	16.326	8.09187	5.37411	9.15304	10.176	17.014		pi.1[4031]	0.488	0.1571	0.002556	0.1425	0.5028	0.7537	3001	5000		beta.i[4031]	0.003156	0.0315	0.0005016	-0.058	0.00236	0.06423	3001	5000
Zv9_00030703 Zv9_00030705 Zv9_00030704 Zv9_00030702	133.61	42.6076	15.7242	8.38718	13.9484	9.87835	6.77984	2.90571		pi.1[4244]	0.4607	0.1435	0.001807	0.1426	0.4716	0.7074	3001	5000		beta.i[4244]	0.002888	0.0316	0.0005404	-0.05956	0.00325	0.0635	3001	5000
Zv9_00043698 Zv9_00043704 Zv9_00043699 Zv9_00043706 Zv9_00043703 Zv9_00043701 Zv9_00043702	18.8619	32.1448	14.6363	4.4266	4.84497	6.77933	6.16141	10.7699		pi.1[6039]	0.5514	0.1789	0.002673	0.1427	0.5751	0.8343	3001	5000		beta.i[6039]	0.002058	0.0316	0.0004953	-0.05993	0.002051	0.06578	3001	5000
Zv9_00000047 Zv9_00000066	35.2685	13.5142	16.2745	50.0896	11.6269	4.09517	4.27901	2.13162		pi.1[9]	0.5131	0.166	0.002737	0.1428	0.5299	0.7873	3001	5000		beta.i[9]	0.002505	0.03161	0.0005211	-0.05914	0.00283	0.06493	3001	5000
Zv9_00032473	1	1	1.09453	2.10563	6.59396	21.8357	16.4201	12.2468		pi.1[4508]	0.7184	0.2352	0.006745	0.1429	0.769	0.9918	3001	5000		beta.i[4508]	0.0003747	0.03169	0.0004694	-0.06288	0.000701	0.06217	3001	5000
Zv9_00022060 Zv9_00022061	1.32685	1.31929	2.81431	4.28535	12.7439	11.257	8.80639	9.11144		pi.1[3061]	0.7222	0.2391	0.005695	0.143	0.7849	0.9915	3001	5000		beta.i[3061]	0.0003973	0.03112	0.0004431	-0.06149	0.00099	0.06043	3001	5000
Zv9_00034049 Zv9_00034047 Zv9_00034048	1.22924	2.19098	4.00828	2.99726	4.73595	10.1372	13.7625	14.7986		pi.1[4740]	0.7288	0.2349	0.005242	0.1431	0.7899	0.9919	3001	5000		beta.i[4740]	0.0007514	0.03153	0.0004796	-0.05983	0.0008226	0.06237	3001	5000
Zv9_00020807 Zv9_00020804 Zv9_00020808 Zv9_00020809 Zv9_00020803 Zv9_00020806 Zv9_00020805	1	1	1	13.5236	16.7978	12.6072	10.6143	7.33511		pi.1[2900]	0.7192	0.2273	0.005229	0.1434	0.775	0.9907	3001	5000		beta.i[2900]	0.001336	0.03133	0.0005361	-0.06235	0.001651	0.06165	3001	5000
Zv9_00028892 Zv9_00028896 Zv9_00028894 Zv9_00028893 Zv9_00028895	1.78923	1.4945	1.79434	2.41583	2.36444	6.33592	18.7495	49.7613		pi.1[3993]	0.74	0.2356	0.006021	0.1434	0.8077	0.9906	3001	5000		beta.i[3993]	0.001382	0.03138	0.0005126	-0.05696	0.0009061	0.06519	3001	5000
Zv9_00050415	1.46532	1.90161	2.45566	3.32872	9.52796	12.7059	12.0351	15.1727		pi.1[7029]	0.7388	0.23	0.005431	0.1434	0.804	0.9916	3001	5000		beta.i[7029]	0.001251	0.03201	0.0005565	-0.06085	0.0009793	0.06532	3001	5000
Zv9_00024197 Zv9_00024194 Zv9_00024195 Zv9_00024199 Zv9_00024198 Zv9_00024196	68.2739	24.2315	21.3835	16.939	10.2766	4.59908	4.32133	5.84398		pi.1[3359]	0.4909	0.1558	0.002048	0.1435	0.5037	0.7508	3001	5000		beta.i[3359]	0.003109	0.03136	0.0005721	-0.05717	0.002836	0.0663	3001	5000
Zv9_00019280 Zv9_00019283 Zv9_00019285 Zv9_00019284 Zv9_00019282	405.708	52.2427	21.9248	15.518	7.23262	7.07956	12.1089	9.35662		pi.1[2679]	0.4333	0.1284	0.001903	0.1436	0.4443	0.6517	3001	5000		beta.i[2679]	0.004266	0.03208	0.0005259	-0.05757	0.003682	0.06878	3001	5000
Zv9_00033957 Zv9_00033953 Zv9_00033955 Zv9_00033952 Zv9_00033956 Zv9_00033954	2.18974	3.23099	2.23109	1.35125	4.82114	18.8137	18.0058	19.5255		pi.1[4728]	0.7186	0.23	0.004855	0.1436	0.7742	0.9869	3001	5000		beta.i[4728]	0.002071	0.03187	0.000461	-0.06136	0.001904	0.06509	3001	5000
Zv9_00046238	23.4506	15.402	14.0672	37.2614	6.85263	4.60633	4.91308	3.79384		pi.1[6444]	0.5376	0.1736	0.002765	0.1441	0.5592	0.8126	3001	5000		beta.i[6444]	0.002508	0.03138	0.0004645	-0.05939	0.003429	0.06356	3001	5000
Zv9_00024807	1.28185	1.18437	1.23393	1.07075	1.15757	17.9018	39.9911	21.7352		pi.1[3429]	0.7122	0.233	0.004701	0.1443	0.7621	0.9906	3001	5000		beta.i[3429]	2.854e-05	0.03211	0.0005491	-0.06218	-0.0001056	0.06303	3001	5000
Zv9_00055663 Zv9_00055662 Zv9_00055660 Zv9_00055661	1.21566	1.07036	1.1619	1.18092	1.12731	5.25847	22.4433	80.0489		pi.1[7722]	0.7472	0.2302	0.00618	0.1443	0.8165	0.9943	3001	5000		beta.i[7722]	-3.061e-05	0.03116	0.0004782	-0.06067	-0.0005492	0.06092	3001	5000
Zv9_00004164	3.37899	4.01352	2.296	3.99064	12.1041	14.6729	13.6685	5.32575		pi.1[590]	0.6848	0.2293	0.004866	0.1447	0.7335	0.9791	3001	5000		beta.i[590]	-4.006e-05	0.03149	0.0004218	-0.06187	-0.0004357	0.06207	3001	5000
Zv9_00005686	32.3492	9.00908	3.43652	5.57841	8.40348	18.4265	16.7729	21.3171		pi.1[813]	0.5301	0.1695	0.003121	0.1447	0.5508	0.8004	3001	5000		beta.i[813]	0.002154	0.03129	0.0004614	-0.0593	0.002265	0.06322	3001	5000
Zv9_00031377 Zv9_00031376 Zv9_00031375	36.685	6.33691	9.99089	9.09061	20.1105	10.2636	10.3347	10.2108		pi.1[4345]	0.5115	0.1693	0.002327	0.1448	0.5311	0.7869	3001	5000		beta.i[4345]	0.003144	0.03143	0.0004202	-0.05892	0.002848	0.06454	3001	5000
Zv9_00017832 Zv9_00017833	9.68521	18.9108	26.6959	4.00853	5.1137	6.93836	4.96024	4.17675		pi.1[2471]	0.5862	0.1925	0.002981	0.1449	0.6143	0.8789	3001	5000		beta.i[2471]	0.002055	0.03164	0.0004814	-0.05881	0.001391	0.06566	3001	5000
Zv9_00037037 Zv9_00037040 Zv9_00037038 Zv9_00037039	45.8838	35.8379	8.00385	3.05008	4.36109	11.5011	11.6874	17.9393		pi.1[5142]	0.5068	0.1616	0.002814	0.1449	0.5235	0.7792	3001	5000		beta.i[5142]	0.002695	0.03143	0.0004746	-0.05869	0.002685	0.06333	3001	5000
Zv9_00051201 Zv9_00051202	33.3457	24.0637	8.91814	8.43835	9.87041	7.70257	7.34942	7.9329		pi.1[7145]	0.5226	0.1688	0.00253	0.1451	0.5403	0.7916	3001	5000		beta.i[7145]	0.002528	0.03132	0.000427	-0.05945	0.00211	0.0632	3001	5000
Zv9_00013066	1	1	1	1	1.03719	12.575	14.9102	85.5917		pi.1[1832]	0.7302	0.2345	0.005588	0.1453	0.7927	0.9905	3001	5000		beta.i[1832]	0.0004859	0.03074	0.0004242	-0.06101	0.000919	0.06029	3001	5000
Zv9_00008306 Zv9_00008305	1	1	1.47694	4.12266	7.7965	15.2789	18.7041	7.91726		pi.1[1163]	0.712	0.2352	0.005605	0.1456	0.7658	0.9908	3001	5000		beta.i[1163]	0.000522	0.03147	0.0004755	-0.06063	0.000375	0.06149	3001	5000
Zv9_00051435	1	1.00277	1.88571	8.00195	20.8087	9.35966	8.72625	8.29379		pi.1[7175]	0.7099	0.2333	0.006141	0.1457	0.7633	0.9916	3001	5000		beta.i[7175]	0.0004103	0.03163	0.0004602	-0.06055	-0.0004401	0.06262	3001	5000
Zv9_00037163	1	1.00868	1.01853	1.12295	6.33402	22.9098	18.7769	13.9487		pi.1[5165]	0.7178	0.2303	0.005328	0.1458	0.7749	0.9916	3001	5000		beta.i[5165]	0.0005961	0.03141	0.0004493	-0.06121	0.0009174	0.06093	3001	5000
Zv9_00053541 Zv9_00053540	213.294	63.6835	43.1935	29.8126	2.24377	2.15933	2.47384	2.39895		pi.1[7453]	0.4344	0.137	0.002062	0.1458	0.4413	0.683	3001	5000		beta.i[7453]	0.002181	0.03123	0.0005505	-0.05807	0.002518	0.06294	3001	5000
Zv9_00001969 Zv9_00001970 Zv9_00001971	1	623.896	152.124	1	5.7746	4.18028	4.13594	5.95208		pi.1[273]	0.5974	0.2133	0.00347	0.1459	0.6138	0.9519	3001	5000		beta.i[273]	0.001119	0.0318	0.0006388	-0.06092	0.0007111	0.06346	3001	5000
Zv9_00034926 Zv9_00034927 Zv9_00034928	26.9168	88.7829	23.9783	7.1426	2.1934	2.3805	1.99951	5.7636		pi.1[4855]	0.5211	0.1718	0.002902	0.1459	0.5401	0.8019	3001	5000		beta.i[4855]	0.002078	0.03139	0.0005054	-0.06053	0.002186	0.0625	3001	5000
Zv9_00017468	3.30693	2.24051	4.33971	2.28783	1.70814	54.227	31.433	8.58535		pi.1[2424]	0.6657	0.2222	0.003743	0.1462	0.7014	0.9771	3001	5000		beta.i[2424]	0.001402	0.03161	0.0005653	-0.06098	0.001395	0.064	3001	5000
Zv9_00024550 Zv9_00024549	3.75282	3.06822	3.0866	2.36151	10.6013	13.9516	12.6183	13.9878		pi.1[3400]	0.694	0.2205	0.004441	0.1462	0.7407	0.9773	3001	5000		beta.i[3400]	0.001981	0.03213	0.0004622	-0.06173	0.002619	0.06377	3001	5000
Zv9_00015259 Zv9_00015258	2.62403	1.73455	22.321	37.2898	8.98498	3.69557	2.8319	5.91957		pi.1[2109]	0.6895	0.2263	0.003819	0.1464	0.7335	0.9868	3001	5000		beta.i[2109]	0.001092	0.03179	0.0005223	-0.06034	0.001686	0.06404	3001	5000
Zv9_00040036 Zv9_00040035	22.6442	9.15415	9.43591	14.5055	2.48136	7.10036	12.7419	45.3385		pi.1[5550]	0.5519	0.1805	0.002536	0.1464	0.5771	0.8313	3001	5000		beta.i[5550]	0.002728	0.03095	0.0004002	-0.0596	0.002352	0.06373	3001	5000
Zv9_00035174 Zv9_00035175 Zv9_00035172	2.77158	2.62743	2.94123	3.99676	1.47134	15.6234	20.9061	27.7774		pi.1[4883]	0.7152	0.2275	0.004891	0.1465	0.7685	0.9879	3001	5000		beta.i[4883]	0.0009699	0.03178	0.0004576	-0.06154	0.001221	0.0628	3001	5000
Zv9_00021957	1.043	1.00364	2.109	6.17833	65.3673	22.412	5.78566	1.08979		pi.1[3048]	0.6797	0.2322	0.005127	0.1471	0.7185	0.9866	3001	5000		beta.i[3048]	0.000631	0.03136	0.000533	-0.06033	0.0005446	0.06181	3001	5000
Zv9_00023636	1.38901	1.84706	1.49	2.81363	2.72978	12.3399	18.9488	27.486		pi.1[3282]	0.7417	0.2303	0.005917	0.1472	0.8058	0.9953	3001	5000		beta.i[3282]	0.0003406	0.03157	0.0004458	-0.06085	0.0009762	0.06198	3001	5000
Zv9_00052349	42.6882	31.7646	32.2538	11.9392	3.96848	4.39167	3.37784	5.03047		pi.1[7293]	0.5056	0.1645	0.002333	0.1472	0.5194	0.7732	3001	5000		beta.i[7293]	0.002965	0.03192	0.0005645	-0.06018	0.003193	0.06608	3001	5000
Zv9_00057604	1.03235	1.07089	1.06958	1.04604	2.56856	8.85477	20.6206	51.3851		pi.1[8006]	0.7351	0.2332	0.006326	0.1473	0.7993	0.9925	3001	5000		beta.i[8006]	0.0001693	0.03198	0.0003937	-0.06255	-3.036e-05	0.06377	3001	5000
Zv9_00024246	34.0503	14.2853	9.97092	11.2501	11.0036	9.15029	8.98212	5.92938		pi.1[3368]	0.5237	0.1672	0.002547	0.1474	0.5409	0.7917	3001	5000		beta.i[3368]	0.001595	0.03199	0.0005786	-0.05944	0.002081	0.06301	3001	5000
Zv9_00008838	1	1	1	1	1	34.1626	34.2518	23.4056		pi.1[1239]	0.7123	0.2341	0.005336	0.1475	0.7679	0.9956	3001	5000		beta.i[1239]	6.436e-05	0.032	0.0005596	-0.06499	6.588e-05	0.06196	3001	5000
Zv9_00028983 Zv9_00028984 Zv9_00028985	7.53834	13.8726	6.37417	7.15807	35.7217	6.83646	4.37593	3.41849		pi.1[4003]	0.5999	0.202	0.003127	0.1475	0.6311	0.909	3001	5000		beta.i[4003]	0.001198	0.03178	0.0004595	-0.06054	0.001193	0.06224	3001	5000
Zv9_00019165 Zv9_00019166 Zv9_00019163 Zv9_00019161 Zv9_00019167 Zv9_00019164 Zv9_00019162	59.3083	34.8613	28.1499	19.5164	4.60752	3.16139	2.80329	3.00258		pi.1[2661]	0.4888	0.155	0.002464	0.1477	0.5022	0.7482	3001	5000		beta.i[2661]	0.001808	0.03129	0.000458	-0.0591	0.001681	0.06249	3001	5000
Zv9_00038551 Zv9_00038545 Zv9_00038549 Zv9_00038543 Zv9_00038546 Zv9_00038547 Zv9_00038542 Zv9_00038548 Zv9_00038544	77.2228	46.7197	1	121.79	36.9789	8.64616	8.22842	8.13983		pi.1[5350]	0.4671	0.1507	0.002376	0.1478	0.4807	0.7256	3001	5000		beta.i[5350]	0.003031	0.03156	0.000496	-0.05775	0.003569	0.065	3001	5000
Zv9_00051311 Zv9_00051315 Zv9_00051314	5.5673	3.7842	5.06191	4.73248	3.19861	9.8331	11.26	43.3538		pi.1[7158]	0.66	0.2126	0.003713	0.1483	0.7	0.9505	3001	5000		beta.i[7158]	0.002638	0.03144	0.0004755	-0.05926	0.002375	0.06571	3001	5000
Zv9_00009870	4.88336	1	3.69938	1	19.4678	12.4453	15.0324	66.6059		pi.1[1421]	0.6738	0.2201	0.004857	0.1484	0.7189	0.9659	3001	5000		beta.i[1421]	0.001329	0.03159	0.0005227	-0.05941	0.001569	0.06414	3001	5000
Zv9_00052476 Zv9_00052475	70.51	55.8422	46.0976	23.2474	1.70872	1.45353	1.25996	31.2867		pi.1[7312]	0.4836	0.1533	0.00251	0.1484	0.4978	0.7406	3001	5000		beta.i[7312]	0.003076	0.03147	0.0005515	-0.05881	0.003026	0.0643	3001	5000
Zv9_00019532 Zv9_00019531 Zv9_00019529 Zv9_00019530	114.665	51.2393	9.04237	3.17894	6.70514	8.68464	10.3288	49.7569		pi.1[2714]	0.4767	0.1477	0.002234	0.1485	0.4922	0.7268	3001	5000		beta.i[2714]	0.003519	0.03207	0.0005049	-0.05883	0.00323	0.06648	3001	5000
Zv9_00024138	41.941	10.4124	8.84215	10.3712	11.8286	13.5688	10.6424	10.8625		pi.1[3351]	0.5167	0.1622	0.00255	0.1486	0.5351	0.7807	3001	5000		beta.i[3351]	0.002736	0.03089	0.0004684	-0.05724	0.002807	0.06426	3001	5000
Zv9_00032590 Zv9_00032593 Zv9_00032591 Zv9_00032592	3.92341	5.61133	6.70878	8.59974	1.86744	5.92408	12.5494	30.715		pi.1[4517]	0.6903	0.2201	0.0052	0.1486	0.7397	0.9714	3001	5000		beta.i[4517]	0.001342	0.03163	0.0005	-0.06021	0.001695	0.06267	3001	5000
Zv9_00048432 Zv9_00048431 Zv9_00048428 Zv9_00048430 Zv9_00048429	1.88601	2.10073	2.88282	27.7603	29.5278	3.99905	4.8058	9.21719		pi.1[6761]	0.7087	0.2298	0.005134	0.1486	0.7588	0.992	3001	5000		beta.i[6761]	0.001105	0.03127	0.0004839	-0.05984	0.001514	0.06158	3001	5000
Zv9_00043316	1.44813	2.36968	3.61002	3.43864	6.82534	12.4592	13.0843	8.452		pi.1[5986]	0.7226	0.2342	0.005241	0.1487	0.7842	0.9902	3001	5000		beta.i[5986]	0.0002752	0.03221	0.0005094	-0.06327	7.57e-05	0.06331	3001	5000
Zv9_00034097	1.21344	1.20051	1.14298	1.56065	4.04094	15.2231	18.317	24.3373		pi.1[4747]	0.7253	0.2319	0.005315	0.1488	0.7844	0.9919	3001	5000		beta.i[4747]	0.0004441	0.03125	0.0004093	-0.06001	7.58e-05	0.06295	3001	5000
Zv9_00031998 Zv9_00031997	70.0791	62.4445	60.2362	32.617	1	1	1	1		pi.1[4448]	0.4785	0.1512	0.002324	0.1489	0.4892	0.7353	3001	5000		beta.i[4448]	0.002308	0.03222	0.0005775	-0.06063	0.002561	0.0653	3001	5000
Zv9_00056762	242.917	63.8745	32.7922	8.64649	9.50264	6.26081	4.93234	2.1798		pi.1[7858]	0.4415	0.1372	0.002379	0.1489	0.4491	0.6839	3001	5000		beta.i[7858]	0.003447	0.03132	0.0005094	-0.05844	0.003112	0.06588	3001	5000
Zv9_00022667 Zv9_00022668	23.4405	15.6564	25.4988	14.182	3.65315	6.01615	6.04224	5.1697		pi.1[3143]	0.5407	0.1732	0.002578	0.149	0.56	0.8138	3001	5000		beta.i[3143]	0.002469	0.03194	0.000475	-0.06119	0.002507	0.06566	3001	5000
Zv9_00020157 Zv9_00020159 Zv9_00020162 Zv9_00020158 Zv9_00020161 Zv9_00020160	24.9148	30.1727	51.8225	39.6852	1.90781	1.70285	1.41912	1.92507		pi.1[2802]	0.5315	0.1677	0.002746	0.1491	0.5495	0.8038	3001	5000		beta.i[2802]	0.00244	0.0314	0.0004609	-0.05891	0.002774	0.06379	3001	5000
Zv9_00030353	244.876	62.329	17.307	16.6584	24.0317	4.54778	3.99061	1.59305		pi.1[4196]	0.4393	0.1369	0.002061	0.1491	0.4476	0.679	3001	5000		beta.i[4196]	0.003398	0.03157	0.0005944	-0.05939	0.003859	0.06462	3001	5000
Zv9_00002856 Zv9_00002857 Zv9_00002855	1.06756	1.23361	1.42633	6.97902	87.1934	16.3557	6.04019	1.91026		pi.1[409]	0.6876	0.2305	0.004437	0.1492	0.7297	0.9887	3001	5000		beta.i[409]	0.0006331	0.032	0.0005084	-0.06023	0.0006397	0.06364	3001	5000
Zv9_00005082	60.1938	24.4061	30.4237	17.1817	6.26866	3.79708	4.72582	4.42919		pi.1[729]	0.4924	0.1571	0.002542	0.1493	0.5079	0.7564	3001	5000		beta.i[729]	0.003992	0.03163	0.000412	-0.05684	0.003531	0.06642	3001	5000
Zv9_00039240 Zv9_00039241	143.955	38.393	35.253	17.7175	4.39581	6.15968	4.61702	2.84539		pi.1[5451]	0.4578	0.1413	0.0025	0.1494	0.4689	0.7023	3001	5000		beta.i[5451]	0.002832	0.03207	0.000646	-0.06117	0.002477	0.06481	3001	5000
Zv9_00050839 Zv9_00050840 Zv9_00050838 Zv9_00050837	71.4726	22.16	15.404	20.0504	11.7558	5.48678	5.30249	4.52093		pi.1[7097]	0.4827	0.1534	0.002395	0.1495	0.4949	0.7416	3001	5000		beta.i[7097]	0.001974	0.03126	0.0005377	-0.06019	0.002284	0.06203	3001	5000
Zv9_00000472 Zv9_00000469 Zv9_00000474 Zv9_00000468 Zv9_00000464 Zv9_00000475 Zv9_00000471 Zv9_00000463 Zv9_00000462 Zv9_00000465 Zv9_00000470 Zv9_00000473	34.4014	23.7161	20.7382	32.1417	13.6227	1	1.2722	1.02408		pi.1[78]	0.5064	0.1672	0.002701	0.1496	0.5234	0.7817	3001	5000		beta.i[78]	0.001648	0.03197	0.0004608	-0.06153	0.001138	0.06566	3001	5000
Zv9_00003035	2.29494	3.57256	2.38709	1.64335	13.0511	17.6494	11.5704	13.3088		pi.1[434]	0.7086	0.2281	0.004462	0.1498	0.7603	0.9873	3001	5000		beta.i[434]	0.0003666	0.0314	0.0004731	-0.0617	0.0003099	0.06099	3001	5000
Zv9_00017966 Zv9_00017965 Zv9_00017964 Zv9_00017967	1.61615	1.81401	1.94599	1.61061	1.49685	11.9301	24.8921	39.9309		pi.1[2493]	0.7389	0.23	0.005073	0.1498	0.8054	0.9926	3001	5000		beta.i[2493]	0.000724	0.03175	0.000488	-0.0604	0.0005687	0.06414	3001	5000
Zv9_00015586 Zv9_00015587 Zv9_00015585	23.2684	46.6059	54.2446	11.739	1.32822	2.36318	2.66362	3.1456		pi.1[2154]	0.5318	0.1726	0.002675	0.1499	0.5511	0.8135	3001	5000		beta.i[2154]	0.00239	0.03205	0.0005381	-0.06038	0.002561	0.06482	3001	5000
Zv9_00007406	20.2823	26.1138	21.6685	6.70463	3.90478	6.14934	6.20469	8.71278		pi.1[1040]	0.5532	0.177	0.002841	0.15	0.5761	0.8288	3001	5000		beta.i[1040]	0.002361	0.03149	0.0004598	-0.05954	0.002454	0.06388	3001	5000
Zv9_00052615 Zv9_00052614 Zv9_00052616 Zv9_00052617	5.17962	1.68675	3.77093	2.40358	1.45178	36.7599	27.9296	25.8617		pi.1[7332]	0.6477	0.215	0.004535	0.15	0.6847	0.9511	3001	5000		beta.i[7332]	0.001124	0.03195	0.0004451	-0.0629	0.0004406	0.06357	3001	5000
Zv9_00002169	1.105	1.03367	1.36818	1.42093	1.91006	10.7427	22.4263	28.9496		pi.1[311]	0.7254	0.232	0.004681	0.1501	0.7842	0.9914	3001	5000		beta.i[311]	0.0004617	0.03108	0.0004468	-0.06111	0.0002871	0.06104	3001	5000
Zv9_00024154 Zv9_00024153	11.7585	32.183	17.2922	9.87436	4.70865	3.83309	4.02477	3.37656		pi.1[3356]	0.5757	0.1876	0.002786	0.1501	0.6	0.8631	3001	5000		beta.i[3356]	0.002139	0.0315	0.0004882	-0.0598	0.002274	0.06361	3001	5000
Zv9_00045791 Zv9_00045792 Zv9_00045790	74.532	32.3377	20.499	6.79582	9.08714	9.20024	7.86818	3.82593		pi.1[6388]	0.4841	0.1523	0.002301	0.1502	0.498	0.739	3001	5000		beta.i[6388]	0.003311	0.03177	0.0005524	-0.05904	0.003335	0.06731	3001	5000
Zv9_00056427	69.7785	31.9441	16.8674	13.0281	8.1929	5.70344	5.73157	4.82936		pi.1[7816]	0.4897	0.1533	0.002464	0.1503	0.5067	0.7455	3001	5000		beta.i[7816]	0.002431	0.03131	0.000464	-0.05939	0.00219	0.06455	3001	5000
Zv9_00035595	1.03509	1.13356	1.07296	1.2185	7.29703	17.7221	16.4902	18.9628		pi.1[4937]	0.7218	0.2349	0.004902	0.1504	0.7849	0.9922	3001	5000		beta.i[4937]	-8.784e-05	0.03206	0.000487	-0.06164	-0.0001241	0.06235	3001	5000
Zv9_00037319 Zv9_00037318	1.30679	1.43107	6.8725	17.993	4.43746	11.3638	9.55412	7.88377		pi.1[5179]	0.7116	0.2324	0.004622	0.1504	0.7604	0.9895	3001	5000		beta.i[5179]	0.0004954	0.03185	0.0004682	-0.06242	0.0003	0.06277	3001	5000
Zv9_00034381	44.325	16.9968	17.8596	21.4327	6.933	5.87728	5.72161	4.89175		pi.1[4786]	0.5066	0.1623	0.002338	0.1506	0.5211	0.7761	3001	5000		beta.i[4786]	0.002604	0.03151	0.0005269	-0.05927	0.003597	0.06265	3001	5000
Zv9_00047651 Zv9_00047650	64.9233	20.6071	17.3394	10.2919	3.96173	8.12148	10.0021	18.3774		pi.1[6648]	0.4956	0.1573	0.002362	0.1506	0.5093	0.7551	3001	5000		beta.i[6648]	0.003011	0.03124	0.0005232	-0.05844	0.00293	0.06395	3001	5000
Zv9_00056535	108.645	24.8716	15.8923	4.94406	15.0545	14.6644	12.4106	8.58763		pi.1[7825]	0.4738	0.1492	0.002192	0.1508	0.4848	0.7301	3001	5000		beta.i[7825]	0.00345	0.03133	0.0004492	-0.05702	0.003536	0.06538	3001	5000
Zv9_00058093	36.2002	18.6698	25.589	14.2106	8.78062	4.66297	6.17088	4.28498		pi.1[8083]	0.5201	0.1654	0.002797	0.151	0.5371	0.7891	3001	5000		beta.i[8083]	0.002843	0.03171	0.0004983	-0.05875	0.00269	0.06587	3001	5000
Zv9_00053076 Zv9_00053078 Zv9_00053077	3.00168	1.95192	1.94387	1.3871	1.06325	5.45247	30.8057	60.7103		pi.1[7389]	0.717	0.2301	0.005279	0.1511	0.7735	0.9869	3001	5000		beta.i[7389]	0.0005909	0.0311	0.0004649	-0.0604	0.0008985	0.06133	3001	5000
Zv9_00014060 Zv9_00014059	25.6616	21.0776	21.2904	17.1983	13.9034	3.66058	3.14815	1.76984		pi.1[1953]	0.5357	0.1693	0.002562	0.1512	0.5561	0.8083	3001	5000		beta.i[1953]	0.002345	0.03134	0.0004957	-0.05881	0.002734	0.06337	3001	5000
Zv9_00023983	1.0613	1.06447	1.07082	1.1506	21.2654	17.5338	18.3682	11.4825		pi.1[3325]	0.7073	0.2314	0.005215	0.1512	0.7574	0.9923	3001	5000		beta.i[3325]	0.001025	0.03149	0.0004799	-0.06043	0.0009794	0.06275	3001	5000
Zv9_00010775 Zv9_00010776	1.69639	7.03672	1.74485	6.94808	36.8054	7.45237	9.06514	7.83472		pi.1[1549]	0.6972	0.2292	0.004602	0.1513	0.7485	0.9859	3001	5000		beta.i[1549]	0.0008139	0.03134	0.0004738	-0.0623	0.001129	0.06184	3001	5000
Zv9_00026218 Zv9_00026220 Zv9_00026219	175.702	62.3532	24.4334	7.27102	4.41108	7.31321	7.86398	6.29791		pi.1[3623]	0.4565	0.1397	0.002234	0.1513	0.4654	0.6975	3001	5000		beta.i[3623]	0.004763	0.03141	0.0004951	-0.05663	0.004732	0.06615	3001	5000
Zv9_00021070 Zv9_00021071	2.06167	1.23672	3.67323	4.07634	7.78432	18.9853	21.8215	6.14163		pi.1[2931]	0.7152	0.2329	0.005922	0.1516	0.7698	0.9917	3001	5000		beta.i[2931]	0.0006029	0.03195	0.0004278	-0.06234	0.000932	0.06274	3001	5000
Zv9_00044837 Zv9_00044839 Zv9_00044838	211.997	100.298	100.655	15.6969	1.48928	1.03644	1	1		pi.1[6233]	0.4457	0.1353	0.002	0.1516	0.4542	0.6841	3001	5000		beta.i[6233]	0.003079	0.03191	0.0006236	-0.05966	0.003192	0.06601	3001	5000
Zv9_00022960 Zv9_00022961	58.4589	27.104	16.2974	10.4448	9.32115	6.93673	6.16928	5.72244		pi.1[3193]	0.4996	0.1556	0.002279	0.1518	0.5169	0.7517	3001	5000		beta.i[3193]	0.002729	0.03158	0.000449	-0.05891	0.003107	0.06417	3001	5000
Zv9_00004689 Zv9_00004688	34.3585	31.6833	7.21251	3.0429	9.65058	10.4411	9.09951	14.0108		pi.1[681]	0.5186	0.1653	0.002397	0.1523	0.536	0.7873	3001	5000		beta.i[681]	0.002257	0.03156	0.0004367	-0.0604	0.002149	0.06491	3001	5000
Zv9_00052856 Zv9_00052860 Zv9_00052859 Zv9_00052857 Zv9_00052858	1	1	1	1	1	1	48.0891	145.116		pi.1[7363]	0.7381	0.2364	0.005864	0.1523	0.8065	0.9942	3001	5000		beta.i[7363]	-0.0004342	0.03124	0.0005264	-0.06098	-0.0002396	0.0615	3001	5000
Zv9_00026249 Zv9_00026251 Zv9_00026253 Zv9_00026252 Zv9_00026250	1.31713	1.87341	14.9574	40.3647	16.1138	2.94971	2.39542	1.28701		pi.1[3630]	0.6948	0.2327	0.005096	0.1525	0.745	0.987	3001	5000		beta.i[3630]	0.0003694	0.03179	0.0005647	-0.06325	0.0001666	0.06074	3001	5000
Zv9_00010706 Zv9_00010708 Zv9_00010707	1.12825	1.10243	1.0943	3.6016	13.8651	11.2532	14.0771	11.1867		pi.1[1542]	0.7163	0.2343	0.005781	0.1526	0.7758	0.9916	3001	5000		beta.i[1542]	-0.0007767	0.03212	0.0004767	-0.06465	-0.000324	0.0619	3001	5000
Zv9_00042364 Zv9_00042365 Zv9_00042368 Zv9_00042366 Zv9_00042367	1.27225	1	3.17073	2.35189	10.073	12.6142	17.3517	11.852		pi.1[5870]	0.7186	0.2279	0.004424	0.1526	0.7758	0.9882	3001	5000		beta.i[5870]	0.0003989	0.03178	0.0004581	-0.06143	2.226e-05	0.06503	3001	5000
Zv9_00041028 Zv9_00041026 Zv9_00041025 Zv9_00041027	29.8731	3.61282	836.144	143.101	1.82259	1.75339	1.15936	1.05596		pi.1[5689]	0.4765	0.1586	0.002423	0.1529	0.4871	0.7569	3001	5000		beta.i[5689]	0.003702	0.03165	0.0007774	-0.05915	0.003743	0.06391	3001	5000
Zv9_00055127 Zv9_00055126	35.3931	20.1346	12.9643	5.97385	15.0947	6.9445	6.91165	11.2844		pi.1[7650]	0.524	0.165	0.002503	0.1529	0.5431	0.7976	3001	5000		beta.i[7650]	0.002603	0.03146	0.0004964	-0.05814	0.002837	0.06383	3001	5000
Zv9_00037622 Zv9_00037620 Zv9_00037621	45.2924	16.2682	22.209	15.8791	7.23179	7.97048	5.36172	6.98941		pi.1[5231]	0.5098	0.1622	0.002457	0.1532	0.524	0.7728	3001	5000		beta.i[5231]	0.002354	0.03091	0.0003991	-0.05745	0.001873	0.06321	3001	5000
Zv9_00036974 Zv9_00036972 Zv9_00036975 Zv9_00036973 Zv9_00036971 Zv9_00036970	1.03041	1.02621	1.86215	6.29458	7.80697	3.42168	2.96436	9240.39		pi.1[5132]	0.7813	0.2341	0.006323	0.1533	0.8543	0.9946	3001	5000		beta.i[5132]	-0.002837	0.03408	0.001967	-0.07194	-0.001969	0.06251	3001	5000
Zv9_00048802 Zv9_00048800 Zv9_00048801	12.2838	25.7973	8.55253	6.04827	8.86883	7.12021	6.09592	5.99371		pi.1[6812]	0.5788	0.1874	0.003082	0.1534	0.6018	0.8664	3001	5000		beta.i[6812]	0.002169	0.03168	0.0005046	-0.05972	0.001651	0.0654	3001	5000
Zv9_00011918 Zv9_00011922 Zv9_00011919 Zv9_00011921 Zv9_00011920 Zv9_00011923 Zv9_00011924	1.21098	1.06169	1	1.01478	7.02246	37.2823	47.4291	4.70722		pi.1[1706]	0.6921	0.2285	0.004241	0.1536	0.7367	0.9875	3001	5000		beta.i[1706]	-0.0005235	0.03149	0.0004767	-0.06355	-0.0003707	0.06064	3001	5000
Zv9_00041818 Zv9_00041816 Zv9_00041817	1.3261	1.31426	4.7392	10.827	7.30792	10.7595	15.3477	6.26215		pi.1[5802]	0.7264	0.2287	0.004848	0.1537	0.7826	0.9923	3001	5000		beta.i[5802]	0.0008174	0.03173	0.000473	-0.06017	0.0006705	0.06434	3001	5000
Zv9_00045190 Zv9_00045189 Zv9_00045187	1.43293	1.41085	1.68978	1.2283	2.75679	21.4791	25.0423	23.8708		pi.1[6298]	0.7323	0.2282	0.005559	0.1539	0.7907	0.9928	3001	5000		beta.i[6298]	0.0006699	0.03166	0.0004653	-0.06057	0.000619	0.06282	3001	5000
Zv9_00050848 Zv9_00050845 Zv9_00050846 Zv9_00050844 Zv9_00050847	32.9014	26.7812	12.8893	4.0084	7.26362	8.67452	8.00638	13.5423		pi.1[7099]	0.5289	0.1679	0.002775	0.154	0.5499	0.7965	3001	5000		beta.i[7099]	0.003285	0.0315	0.0003965	-0.05657	0.002349	0.06567	3001	5000
Zv9_00057488 Zv9_00057487 Zv9_00057486	18.5393	26.9889	13.4352	6.56711	9.543	5.33627	5.28443	6.45336		pi.1[7979]	0.5532	0.1773	0.002682	0.154	0.5767	0.8288	3001	5000		beta.i[7979]	0.002677	0.03192	0.0004893	-0.06036	0.002741	0.0665	3001	5000
Zv9_00009658 Zv9_00009660 Zv9_00009659 Zv9_00009657 Zv9_00009656 Zv9_00009655	2.60299	2.43793	2.58035	2.08019	2.15051	22.2006	22.2752	23.4668		pi.1[1384]	0.7134	0.2283	0.005554	0.1541	0.7647	0.9898	3001	5000		beta.i[1384]	0.00115	0.03132	0.0005255	-0.06074	0.0009592	0.06204	3001	5000
Zv9_00035596	1	1	1	1.00448	1.24636	28.9212	44.0057	19.0912		pi.1[4938]	0.7119	0.2272	0.004413	0.1541	0.7631	0.9894	3001	5000		beta.i[4938]	-0.0004854	0.0319	0.0005134	-0.06252	-0.0006127	0.06257	3001	5000
Zv9_00056631	22.1823	28.6341	12.0787	8.03602	9.99265	5.83599	6.1413	6.29694		pi.1[7838]	0.5486	0.1734	0.002889	0.1545	0.5708	0.8226	3001	5000		beta.i[7838]	0.002933	0.03139	0.00047	-0.05893	0.002513	0.06417	3001	5000
Zv9_00027621 Zv9_00027617 Zv9_00027619 Zv9_00027620 Zv9_00027618	1.76221	2.29083	2.43987	18.8477	24.3519	5.14264	5.1282	11.8801		pi.1[3809]	0.7168	0.2307	0.004979	0.1546	0.7704	0.9906	3001	5000		beta.i[3809]	0.002033	0.03152	0.0005232	-0.05816	0.001339	0.06434	3001	5000
Zv9_00034614	5.64108	12.72	22.3124	12.1583	3.39492	5.79875	5.25039	4.62186		pi.1[4811]	0.6441	0.203	0.003543	0.1548	0.6774	0.9304	3001	5000		beta.i[4811]	0.001382	0.03165	0.0004142	-0.06139	0.001667	0.06384	3001	5000
Zv9_00019199 Zv9_00019198	1.77437	2.83287	6.29153	26.2905	12.0608	4.85409	4.09332	3.82689		pi.1[2666]	0.7125	0.2269	0.004042	0.1549	0.7614	0.9901	3001	5000		beta.i[2666]	0.001521	0.03143	0.0004351	-0.05876	0.001398	0.06342	3001	5000
Zv9_00011225 Zv9_00011224 Zv9_00011226	49.8536	30.968	12.1624	11.5511	11.4701	6.11899	5.75415	4.84686		pi.1[1609]	0.5037	0.1609	0.002266	0.1551	0.5214	0.7716	3001	5000		beta.i[1609]	0.003772	0.03221	0.0005337	-0.0601	0.003282	0.06611	3001	5000
Zv9_00038342 Zv9_00038338 Zv9_00038339 Zv9_00038340 Zv9_00038341	4.8651	2.15851	2.45437	1.77142	4.78029	9.85521	19.6578	53.6478		pi.1[5334]	0.6857	0.219	0.005048	0.1551	0.7342	0.9688	3001	5000		beta.i[5334]	0.002111	0.03195	0.0004218	-0.0612	0.002378	0.06506	3001	5000
Zv9_00048904	65.7	52.9398	16.7624	6.97896	7.09589	6.74121	6.54624	5.39014		pi.1[6838]	0.4964	0.1552	0.002633	0.1551	0.5135	0.7485	3001	5000		beta.i[6838]	0.002959	0.0324	0.0005454	-0.06108	0.003206	0.06758	3001	5000
Zv9_00000010 Zv9_00000011	1.01649	1	1	2.45297	2.63831	11.2267	16.626	33.6408		pi.1[2]	0.733	0.2341	0.005551	0.1552	0.799	0.9909	3001	5000		beta.i[2]	0.0005274	0.03184	0.0005062	-0.06222	5.079e-05	0.06411	3001	5000
Zv9_00024285 Zv9_00024286 Zv9_00024284	54.7403	40.4838	43.5471	22.5313	1	7.32071	6.1247	5.7582		pi.1[3373]	0.4962	0.1601	0.002441	0.1552	0.5112	0.7648	3001	5000		beta.i[3373]	0.002843	0.03208	0.0005218	-0.0598	0.00284	0.06651	3001	5000
Zv9_00026405 Zv9_00026408 Zv9_00026407 Zv9_00026409	3.35628	1.4049	5.37763	16.1556	14.0043	9.13666	6.29399	5.40979		pi.1[3647]	0.6946	0.2243	0.004425	0.1555	0.7371	0.9834	3001	5000		beta.i[3647]	0.002086	0.03158	0.0004627	-0.0607	0.0022	0.06373	3001	5000
Zv9_00034898	1.09352	1.14451	1.14402	4.37943	3.61181	16.7994	21.6608	15.5305		pi.1[4849]	0.7249	0.2278	0.005244	0.1555	0.7823	0.9911	3001	5000		beta.i[4849]	0.0002547	0.03214	0.0005112	-0.06055	0.0001115	0.06425	3001	5000
Zv9_00000136	1	1	1	1.1176	3.18952	26.9805	23.5122	22.5073		pi.1[22]	0.7148	0.2311	0.00517	0.1556	0.7709	0.9911	3001	5000		beta.i[22]	0.0003681	0.03189	0.0004357	-0.06034	0.0005576	0.06309	3001	5000
Zv9_00052384 Zv9_00052383	1.47005	1.32113	1.44002	1.86234	1.42492	16.8854	16.8307	66.5557		pi.1[7297]	0.7511	0.2259	0.004629	0.1556	0.8169	0.9924	3001	5000		beta.i[7297]	0.000878	0.03159	0.0005456	-0.06133	0.001113	0.06205	3001	5000
Zv9_00054638	9.07962	25.5335	15.0121	5.48764	8.91566	7.65373	4.94001	4.22582		pi.1[7586]	0.6041	0.1943	0.003384	0.1558	0.6329	0.8938	3001	5000		beta.i[7586]	0.002016	0.03167	0.0005413	-0.05955	0.001631	0.06529	3001	5000
Zv9_00022867	111.801	36.1019	23.0027	7.63066	11.7188	6.38885	6.93918	9.34794		pi.1[3177]	0.4732	0.1464	0.002316	0.1559	0.4871	0.7254	3001	5000		beta.i[3177]	0.003453	0.03152	0.000491	-0.05807	0.004033	0.06328	3001	5000
Zv9_00010700 Zv9_00010702 Zv9_00010701 Zv9_00010703	8.31309	28.2775	11.8978	4.78367	6.12135	7.4821	5.79781	5.12388		pi.1[1541]	0.603	0.1981	0.003489	0.1561	0.6316	0.8962	3001	5000		beta.i[1541]	0.003021	0.03153	0.0004656	-0.0577	0.002759	0.06344	3001	5000
Zv9_00055887	1.01529	1.0404	1.09412	1.23004	5.33651	26.2649	22.0061	19.3547		pi.1[7744]	0.7283	0.2274	0.005013	0.1562	0.7863	0.9927	3001	5000		beta.i[7744]	0.0003686	0.03162	0.0004954	-0.06237	0.0007533	0.06147	3001	5000
Zv9_00027699 Zv9_00027700	141.636	16.0948	14.7883	18.3851	15.6273	13.012	11.6203	3.31521		pi.1[3825]	0.4557	0.143	0.002055	0.1563	0.4655	0.7065	3001	5000		beta.i[3825]	0.004128	0.03144	0.000549	-0.05791	0.004531	0.06771	3001	5000
Zv9_00034645	4.11964	4.2741	2.51342	3.10201	6.72732	14.9695	13.2535	14.5662		pi.1[4817]	0.6794	0.2176	0.004241	0.1563	0.7198	0.9682	3001	5000		beta.i[4817]	0.00132	0.03153	0.0004737	-0.06129	0.001566	0.06223	3001	5000
Zv9_00044511 Zv9_00044512	81.5307	16.4377	5.03263	3.09283	19.7851	27.6756	22.9641	11.9134		pi.1[6180]	0.4855	0.1515	0.002205	0.1563	0.4968	0.7452	3001	5000		beta.i[6180]	0.002632	0.03192	0.0005273	-0.05867	0.002576	0.06703	3001	5000
Zv9_00012584	33.195	28.3083	10.718	5.50221	8.99355	8.20728	9.48135	13.4848		pi.1[1779]	0.5302	0.1666	0.002454	0.1564	0.5472	0.7983	3001	5000		beta.i[1779]	0.002907	0.03143	0.000499	-0.05881	0.002834	0.06471	3001	5000
Zv9_00016128	100.632	23.4633	12.1437	8.57841	12.1109	11.4502	12.4638	10.2615		pi.1[2232]	0.4842	0.1502	0.002222	0.1564	0.4979	0.7402	3001	5000		beta.i[2232]	0.003012	0.03102	0.0004819	-0.05775	0.003175	0.0645	3001	5000
Zv9_00009411 Zv9_00009412 Zv9_00009413	66.7783	28.192	15.8214	8.67675	8.74724	9.42261	5.71126	8.38278		pi.1[1346]	0.4931	0.1538	0.002336	0.1565	0.5073	0.7524	3001	5000		beta.i[1346]	0.002775	0.03163	0.0005067	-0.05849	0.003069	0.06466	3001	5000
Zv9_00038729	168.225	96.6676	45.3571	18.6987	2.68409	2.59932	1.8289	2.3298		pi.1[5384]	0.4577	0.138	0.002049	0.1565	0.4679	0.6962	3001	5000		beta.i[5384]	0.0032	0.03098	0.0006781	-0.05808	0.003136	0.06419	3001	5000
Zv9_00035115 Zv9_00035112 Zv9_00035116 Zv9_00035114	79.1649	34.2825	31.5254	14.4004	6.44086	4.7531	7.35895	6.54056		pi.1[4875]	0.4957	0.1505	0.002275	0.1568	0.5112	0.7498	3001	5000		beta.i[4875]	0.002663	0.03149	0.0005673	-0.05854	0.002636	0.06416	3001	5000
Zv9_00046191 Zv9_00046193 Zv9_00046190 Zv9_00046192	49.1422	8.61366	13.2798	19.9363	9.21775	7.76889	5.71868	45.6108		pi.1[6436]	0.5118	0.1591	0.002489	0.1569	0.5292	0.7733	3001	5000		beta.i[6436]	0.003028	0.03098	0.0005884	-0.05804	0.002434	0.06233	3001	5000
Zv9_00031250	1.31976	1.78392	1.52599	1.23928	18.4433	22.7306	15.6493	9.09769		pi.1[4319]	0.7166	0.2329	0.005233	0.157	0.7725	0.992	3001	5000		beta.i[4319]	0.0004099	0.03194	0.0004627	-0.06247	0.0004261	0.06489	3001	5000
Zv9_00031351 Zv9_00031350	51.6148	10.4067	8.43115	6.28897	14.8331	14.6153	10.4823	14.72		pi.1[4338]	0.5004	0.16	0.002339	0.157	0.5129	0.7656	3001	5000		beta.i[4338]	0.003432	0.03224	0.0004662	-0.0589	0.003216	0.06503	3001	5000
Zv9_00034059	174.22	82.5748	18.4135	1	1.75982	16.8392	15.1794	60.1241		pi.1[4742]	0.4587	0.139	0.002169	0.1572	0.4678	0.6994	3001	5000		beta.i[4742]	0.004484	0.03072	0.0006127	-0.05423	0.00443	0.06564	3001	5000
Zv9_00035931 Zv9_00035929 Zv9_00035928	59.0841	27.6496	12.8234	5.93184	14.6048	12.0658	8.98299	3.74824		pi.1[4986]	0.4933	0.1549	0.002308	0.1573	0.5044	0.756	3001	5000		beta.i[4986]	0.003081	0.03164	0.0004782	-0.05855	0.002635	0.06504	3001	5000
Zv9_00044674	1.12685	1.19921	1.54487	7.69565	41.6059	12.2668	8.36773	4.31353		pi.1[6210]	0.7047	0.2311	0.004549	0.1576	0.7504	0.993	3001	5000		beta.i[6210]	-0.000145	0.03167	0.0004717	-0.06187	5.56e-05	0.06218	3001	5000
Zv9_00017636 Zv9_00017635	1.24961	1.09899	1.37999	2.3114	17.2258	14.1936	10.9802	19.7914		pi.1[2452]	0.7349	0.224	0.005149	0.1577	0.795	0.9926	3001	5000		beta.i[2452]	0.0007518	0.03124	0.0004864	-0.06055	0.0007748	0.05993	3001	5000
Zv9_00033666 Zv9_00033668 Zv9_00033667	205.65	39.2016	10.593	15.6596	29.3478	10.1348	8.72378	2.72188		pi.1[4687]	0.4518	0.1367	0.002138	0.1578	0.4619	0.6898	3001	5000		beta.i[4687]	0.002863	0.03137	0.0005728	-0.05972	0.002752	0.06401	3001	5000
Zv9_00008623	1	1.0137	1.19035	1.05232	2.14713	29.694	39.3712	13.6546		pi.1[1205]	0.7153	0.2277	0.005267	0.158	0.7693	0.9898	3001	5000		beta.i[1205]	1.037e-05	0.03148	0.0004553	-0.06059	0.0001134	0.06044	3001	5000
Zv9_00058184	2.12268	5.91607	11.9715	24.508	9.51653	4.12435	3.43296	2.38802		pi.1[8096]	0.7086	0.2257	0.005172	0.158	0.7565	0.9885	3001	5000		beta.i[8096]	0.0009815	0.03106	0.0004334	-0.06273	0.001138	0.06089	3001	5000
Zv9_00016410	1.06669	1	2.68704	5.56036	11.5639	10.2019	10.3404	10.3884		pi.1[2284]	0.7246	0.2327	0.005426	0.1581	0.786	0.9916	3001	5000		beta.i[2284]	0.0006053	0.03097	0.000502	-0.06031	0.0005419	0.06261	3001	5000
Zv9_00019047	1.27943	1.45539	1.60603	3.71279	8.74468	18.6368	15.2241	8.37321		pi.1[2646]	0.7179	0.2298	0.005477	0.1581	0.7714	0.9909	3001	5000		beta.i[2646]	0.0002215	0.0317	0.0005264	-0.06336	0.0008247	0.06151	3001	5000
Zv9_00039032 Zv9_00039033	11.5475	13.656	23.354	20.4374	4.00689	5.20155	3.98062	3.33304		pi.1[5428]	0.5803	0.1879	0.003275	0.1583	0.6102	0.8659	3001	5000		beta.i[5428]	0.001364	0.03137	0.0004114	-0.05889	0.0008635	0.06397	3001	5000
Zv9_00042455 Zv9_00042454	141.461	65.1881	34.7924	16.0049	6.70018	4.87677	3.88005	3.05047		pi.1[5878]	0.4739	0.1406	0.002499	0.1583	0.4858	0.7169	3001	5000		beta.i[5878]	0.002344	0.03224	0.0006126	-0.06128	0.002655	0.06572	3001	5000
Zv9_00002564	1.33642	1	1	1	1.29766	6.50028	21.4042	69.0252		pi.1[370]	0.7444	0.2282	0.004543	0.1584	0.8069	0.9932	3001	5000		beta.i[370]	0.0004159	0.03163	0.0004683	-0.0601	0.0003969	0.06129	3001	5000
Zv9_00019205 Zv9_00019206	50.3104	18.3647	13.0478	10.0242	12.3152	7.82818	6.61352	7.41741		pi.1[2667]	0.4983	0.1561	0.002606	0.1587	0.5111	0.762	3001	5000		beta.i[2667]	0.002846	0.03118	0.000531	-0.05729	0.003287	0.0639	3001	5000
Zv9_00040441 Zv9_00040438 Zv9_00040440 Zv9_00040439	12.4006	15.9576	28.3922	27.0117	2.36567	4.52806	3.91815	8.8345		pi.1[5609]	0.5798	0.1851	0.003021	0.1587	0.604	0.8658	3001	5000		beta.i[5609]	0.00244	0.0316	0.0004793	-0.05774	0.002526	0.06413	3001	5000
Zv9_00005586	49.2943	30.3323	26.1892	10.0122	3.1829	6.45256	5.30908	6.27889		pi.1[800]	0.4991	0.1603	0.002232	0.1588	0.5166	0.771	3001	5000		beta.i[800]	0.002952	0.03207	0.0005093	-0.06081	0.002824	0.06515	3001	5000
Zv9_00001189	113.901	14.2624	4.18148	3.6118	16.6257	31.73	36.161	17.4821		pi.1[173]	0.4774	0.1469	0.002262	0.1589	0.4902	0.7254	3001	5000		beta.i[173]	0.003224	0.03211	0.0004877	-0.05902	0.002883	0.06525	3001	5000
Zv9_00019555 Zv9_00019554 Zv9_00019552 Zv9_00019553 Zv9_00019556	32.5063	32.2671	12.8823	11.819	5.36897	8.00286	9.19838	4.16387		pi.1[2716]	0.525	0.1664	0.002521	0.1589	0.542	0.7933	3001	5000		beta.i[2716]	0.002749	0.03142	0.000443	-0.05979	0.002947	0.06307	3001	5000
Zv9_00006908 Zv9_00006913 Zv9_00006910 Zv9_00006911 Zv9_00006909 Zv9_00006907 Zv9_00006912	156.926	38.4356	32.3176	23.7444	4.57289	7.07431	5.32893	8.25205		pi.1[970]	0.4643	0.1425	0.002219	0.159	0.4757	0.7137	3001	5000		beta.i[970]	0.003322	0.03177	0.0005338	-0.0592	0.003353	0.06556	3001	5000
Zv9_00043430 Zv9_00043431	1.43412	2.25102	1.99926	1.6943	7.27449	10.0684	10.7748	49.1601		pi.1[6007]	0.7542	0.2254	0.00511	0.159	0.8167	0.994	3001	5000		beta.i[6007]	0.000612	0.03177	0.0004066	-0.06065	0.0007759	0.06306	3001	5000
Zv9_00046474 Zv9_00046473 Zv9_00046475	1.08408	1.04913	2.12171	26.0802	30.2305	10.7247	6.39015	5.07097		pi.1[6470]	0.7127	0.227	0.005373	0.1591	0.7631	0.9905	3001	5000		beta.i[6470]	0.0007599	0.03211	0.0005347	-0.06344	0.001028	0.06193	3001	5000
Zv9_00051476 Zv9_00051474 Zv9_00051473 Zv9_00051475 Zv9_00051472	1.02864	1.04545	1.44806	10.0055	16.2722	8.32702	11.6227	11.946		pi.1[7178]	0.7197	0.2296	0.005077	0.1592	0.7739	0.9916	3001	5000		beta.i[7178]	0.0008621	0.0318	0.0005117	-0.06242	0.0008578	0.0639	3001	5000
Zv9_00044461 Zv9_00044462	43.8259	97.4901	47.7405	9.16822	1.58383	1.08073	1	1		pi.1[6172]	0.5001	0.1573	0.00238	0.1593	0.5134	0.768	3001	5000		beta.i[6172]	0.001587	0.03177	0.0004432	-0.0592	0.001331	0.06415	3001	5000
Zv9_00008096	47.8607	32.0933	19.8829	17.506	9.56885	4.2443	4.45034	3.78065		pi.1[1134]	0.5112	0.1586	0.002379	0.1595	0.531	0.7747	3001	5000		beta.i[1134]	0.003317	0.03105	0.0004242	-0.0563	0.003456	0.06269	3001	5000
Zv9_00024018 Zv9_00024020 Zv9_00024021 Zv9_00024019	4.17702	5.82999	3.51859	2.8843	5.97934	10.2187	13.9494	20.8625		pi.1[3332]	0.6883	0.2179	0.005064	0.1597	0.7349	0.9734	3001	5000		beta.i[3332]	0.0008088	0.0314	0.0004684	-0.06175	0.001333	0.0617	3001	5000
Zv9_00040760 Zv9_00040757 Zv9_00040764 Zv9_00040763 Zv9_00040756 Zv9_00040765 Zv9_00040762 Zv9_00040758 Zv9_00040761 Zv9_00040759	29.9236	28.1845	16.4637	8.22077	6.75995	6.01668	6.3464	5.24571		pi.1[5652]	0.5314	0.1691	0.002467	0.1598	0.5503	0.8076	3001	5000		beta.i[5652]	0.002848	0.03155	0.000408	-0.05966	0.002952	0.06448	3001	5000
Zv9_00043230 Zv9_00043234 Zv9_00043232 Zv9_00043233 Zv9_00043231	37.7793	27.276	17.8853	12.9337	12.5551	6.15814	3.97426	3.66448		pi.1[5972]	0.5288	0.1639	0.002203	0.1598	0.5471	0.7896	3001	5000		beta.i[5972]	0.003067	0.03161	0.0004631	-0.05879	0.003175	0.06426	3001	5000
Zv9_00027216	1.07484	1.15067	1.26605	1.13331	1.21113	5.78957	20.846	97.0445		pi.1[3770]	0.7481	0.2262	0.005493	0.1599	0.8118	0.992	3001	5000		beta.i[3770]	0.001126	0.03196	0.0005516	-0.06088	0.001449	0.06313	3001	5000
Zv9_00035952 Zv9_00035953	184.998	71.0761	8.93906	7.60044	11.9673	12.5429	11.9816	8.18099		pi.1[4988]	0.4622	0.1372	0.001824	0.1599	0.4744	0.7068	3001	5000		beta.i[4988]	0.003571	0.03175	0.0006239	-0.05912	0.003304	0.06585	3001	5000
Zv9_00020832 Zv9_00020830 Zv9_00020831 Zv9_00020829	1.30683	1.02133	3.18398	6.00908	3.03466	26.5364	22.0269	9.22822		pi.1[2903]	0.7186	0.2312	0.005214	0.16	0.7769	0.9922	3001	5000		beta.i[2903]	0.0007808	0.03139	0.0004747	-0.06028	0.0006656	0.06168	3001	5000
Zv9_00031878 Zv9_00031875 Zv9_00031873 Zv9_00031879 Zv9_00031872 Zv9_00031877 Zv9_00031871 Zv9_00031870 Zv9_00031874 Zv9_00031876	1	1	1	11.7894	12.8744	9.64809	11.9557	9.92079		pi.1[4431]	0.7242	0.2287	0.00522	0.1601	0.7794	0.9929	3001	5000		beta.i[4431]	0.00018	0.03194	0.0004757	-0.06367	0.0002444	0.06189	3001	5000
Zv9_00044515	1	1	4.97448	24.1432	7.7045	13.1396	10.2573	6.77896		pi.1[6182]	0.7194	0.2237	0.005804	0.1601	0.7705	0.9891	3001	5000		beta.i[6182]	0.0009007	0.03212	0.0004821	-0.06169	0.0008434	0.063	3001	5000
Zv9_00019160 Zv9_00019159	63.6733	36.0906	29.8121	20.7754	5.42227	3.35479	3.04778	3.72386		pi.1[2660]	0.4967	0.1523	0.00236	0.1602	0.5091	0.7529	3001	5000		beta.i[2660]	0.002144	0.03163	0.0006261	-0.05854	0.001905	0.06339	3001	5000
Zv9_00033316	8.23386	11.904	20.1723	18.3136	6.1349	4.06866	4.04074	2.0584		pi.1[4632]	0.605	0.1964	0.003694	0.1603	0.6377	0.8951	3001	5000		beta.i[4632]	0.001491	0.03149	0.0005083	-0.06091	0.001084	0.06353	3001	5000
Zv9_00029554	1	1	1	1	1	1323.01	432.234	1.31899		pi.1[4088]	0.5635	0.2024	0.004018	0.1605	0.5668	0.9378	3001	5000		beta.i[4088]	0.0001426	0.03147	0.001117	-0.06065	0.0002312	0.06116	3001	5000
Zv9_00032622 Zv9_00032621	48.3526	35.992	22.0665	12.2288	13.5129	4.14417	4.2016	3.43435		pi.1[4520]	0.5105	0.1574	0.002147	0.1605	0.5295	0.767	3001	5000		beta.i[4520]	0.002968	0.03131	0.0005339	-0.05845	0.003502	0.064	3001	5000
Zv9_00056595 Zv9_00056594	29.8909	7.81145	10.7597	22.4226	20.5217	6.71496	6.17975	6.10985		pi.1[7832]	0.5291	0.1662	0.003129	0.1605	0.5449	0.8036	3001	5000		beta.i[7832]	0.001777	0.03197	0.0005993	-0.06142	0.001929	0.06517	3001	5000
Zv9_00035635	66.2769	30.3887	12.5673	28.2963	7.71558	6.50619	5.80928	6.53399		pi.1[4941]	0.4944	0.1557	0.002343	0.1606	0.5102	0.7579	3001	5000		beta.i[4941]	0.003734	0.03162	0.0005414	-0.05705	0.003487	0.06682	3001	5000
Zv9_00016388 Zv9_00016390	5.38664	3.87864	17.3951	28.179	15.043	5.2901	4.92248	1.15911		pi.1[2282]	0.6475	0.2074	0.004421	0.1607	0.6804	0.9503	3001	5000		beta.i[2282]	0.002036	0.03122	0.0005777	-0.06146	0.002771	0.06393	3001	5000
Zv9_00008349	1	1	1	2.8071	2.33946	6.57854	9.58076	173.986		pi.1[1170]	0.7548	0.2311	0.005618	0.1608	0.8219	0.9944	3001	5000		beta.i[1170]	0.0008661	0.03209	0.0004757	-0.06118	0.001804	0.0627	3001	5000
Zv9_00009884 Zv9_00009883	9.35536	24.5553	21.8805	13.098	2.06178	4.13284	5.47256	8.54153		pi.1[1426]	0.6005	0.1896	0.003339	0.1608	0.6246	0.89	3001	5000		beta.i[1426]	0.002176	0.03136	0.000407	-0.05975	0.002355	0.06326	3001	5000
Zv9_00058520 Zv9_00058519	13.3232	9.24531	8.61579	3.28477	5.14417	8.10267	18.1134	32.4831		pi.1[8137]	0.5911	0.1889	0.003007	0.1608	0.6205	0.8706	3001	5000		beta.i[8137]	0.002204	0.0313	0.0004556	-0.05906	0.002032	0.06311	3001	5000
Zv9_00022235	2.10483	3.55507	6.14129	5.80101	3.31961	8.96483	9.89536	21.5351		pi.1[3082]	0.7389	0.2255	0.004993	0.161	0.7989	0.9923	3001	5000		beta.i[3082]	-7.802e-05	0.03186	0.0005133	-0.06149	0.0002942	0.06283	3001	5000
Zv9_00048157 Zv9_00048158	57.6761	20.6399	23.5236	13.7687	5.68866	6.66834	6.28756	6.80478		pi.1[6726]	0.5005	0.1581	0.002261	0.161	0.5172	0.7668	3001	5000		beta.i[6726]	0.003214	0.03186	0.0004701	-0.05972	0.003697	0.06602	3001	5000
Zv9_00030377	1	1	1	1	7.02442	18.5377	10.8917	38.3866		pi.1[4201]	0.73	0.2253	0.004735	0.1611	0.7884	0.9919	3001	5000		beta.i[4201]	0.000369	0.03151	0.0004954	-0.06088	0.000253	0.0626	3001	5000
Zv9_00051066 Zv9_00051068 Zv9_00051067	2.20431	1.28993	1.36353	2.52567	5.91692	20.7924	18.8474	12.462		pi.1[7122]	0.7202	0.2308	0.004862	0.1611	0.7772	0.9912	3001	5000		beta.i[7122]	0.0004982	0.0316	0.0005225	-0.06042	0.0005242	0.06345	3001	5000
Zv9_00056726	9.0904	27.1131	13.7625	9.2489	6.33172	4.3005	3.56484	8.31255		pi.1[7851]	0.6068	0.1922	0.002866	0.1612	0.6365	0.8922	3001	5000		beta.i[7851]	0.0009221	0.03147	0.0005492	-0.061	0.0009761	0.06305	3001	5000
Zv9_00045179 Zv9_00045178	68.7366	18.3939	11.9846	13.6567	12.3959	9.80657	6.3457	10.1943		pi.1[6296]	0.4943	0.1529	0.002606	0.1613	0.5097	0.7486	3001	5000		beta.i[6296]	0.003421	0.03153	0.0004715	-0.05888	0.002726	0.06689	3001	5000
Zv9_00044347 Zv9_00044346 Zv9_00044348	13.1952	26.3675	44.2362	20.748	1.92003	2.39018	1.77751	1.99905		pi.1[6149]	0.5606	0.1821	0.003362	0.1614	0.583	0.8492	3001	5000		beta.i[6149]	0.00199	0.03209	0.0005286	-0.06101	0.002298	0.06586	3001	5000
Zv9_00049654	100.848	37.5008	25.508	22.9377	8.28726	3.95839	3.77992	3.1066		pi.1[6922]	0.4831	0.1459	0.002066	0.1614	0.496	0.7304	3001	5000		beta.i[6922]	0.003269	0.03162	0.0005186	-0.05911	0.003005	0.06573	3001	5000
Zv9_00018986	36.3688	17.8165	23.6507	20.9377	6.28804	4.64222	3.50375	25.6752		pi.1[2639]	0.5264	0.164	0.002673	0.1615	0.5434	0.7897	3001	5000		beta.i[2639]	0.001951	0.03131	0.0004629	-0.05959	0.001725	0.06302	3001	5000
Zv9_00039364 Zv9_00039363	135.879	62.1247	24.3306	11.4866	7.77814	8.67101	7.12043	2.86815		pi.1[5470]	0.4742	0.1433	0.001973	0.1616	0.4875	0.7162	3001	5000		beta.i[5470]	0.002709	0.0315	0.0005809	-0.05867	0.003131	0.06361	3001	5000
Zv9_00052193	51.4528	13.0866	12.1137	14.1518	6.26784	10.6966	10.4016	19.3754		pi.1[7272]	0.5099	0.1588	0.002557	0.1616	0.5256	0.7727	3001	5000		beta.i[7272]	0.002864	0.03217	0.0005399	-0.06074	0.003216	0.06563	3001	5000
Zv9_00015326 Zv9_00015328 Zv9_00015327 Zv9_00015329	1	1	1	1	7.55979	17.8964	17.2504	19.0726		pi.1[2118]	0.7278	0.2298	0.004678	0.1618	0.7853	0.9916	3001	5000		beta.i[2118]	0.0008213	0.03156	0.0005717	-0.06172	0.0004987	0.0648	3001	5000
Zv9_00002826 Zv9_00002824 Zv9_00002825	16.6616	52.7451	80.9697	1	49.4562	74.6319	1	1		pi.1[405]	0.5269	0.1683	0.002452	0.1619	0.5437	0.8126	3001	5000		beta.i[405]	0.001464	0.03193	0.0005366	-0.06056	0.001266	0.06363	3001	5000
Zv9_00008281 Zv9_00008282	62.1988	22.3257	10.233	13.0722	15.4994	10.2145	8.34393	3.33317		pi.1[1157]	0.4952	0.1556	0.002472	0.1626	0.5065	0.7577	3001	5000		beta.i[1157]	0.002728	0.03219	0.0006047	-0.06044	0.003018	0.06669	3001	5000
Zv9_00058014	46.4616	26.1478	56.5578	58.7257	3.21973	1.87615	1.94102	2.84576		pi.1[8072]	0.5057	0.1534	0.002471	0.1626	0.5163	0.7629	3001	5000		beta.i[8072]	0.002636	0.03158	0.0005351	-0.0577	0.002303	0.06639	3001	5000
Zv9_00001940 Zv9_00001939	25.4913	23.6867	33.4322	15.3185	6.04895	3.67335	3.11489	3.06124		pi.1[268]	0.5382	0.1709	0.00338	0.1627	0.5585	0.8163	3001	5000		beta.i[268]	0.002594	0.0311	0.0004828	-0.05956	0.002888	0.06407	3001	5000
Zv9_00043726	101.217	3.48311	5.90668	16.0793	26.2351	28.0461	23.7405	19.2828		pi.1[6040]	0.4779	0.1465	0.00232	0.1628	0.4879	0.7306	3001	5000		beta.i[6040]	0.004101	0.03178	0.0006312	-0.05869	0.003897	0.0661	3001	5000
Zv9_00049379	41.5338	29.6672	40.1986	26.3968	18.0094	1.40105	1.14952	1		pi.1[6894]	0.5182	0.1593	0.002476	0.1629	0.5337	0.7876	3001	5000		beta.i[6894]	0.00299	0.0313	0.000638	-0.05737	0.002594	0.06571	3001	5000
Zv9_00020197	1	1	1.04152	3.29609	10.9695	16.0808	15.9402	14.5952		pi.1[2811]	0.7348	0.2202	0.005155	0.163	0.7941	0.9913	3001	5000		beta.i[2811]	-8.39e-05	0.03185	0.0004158	-0.06116	-0.0004501	0.0633	3001	5000
Zv9_00002155 Zv9_00002156	16.8522	45.8043	34.4272	17.879	2.5559	1.15137	1.0635	1.07156		pi.1[310]	0.5532	0.172	0.002775	0.1632	0.5709	0.8303	3001	5000		beta.i[310]	0.002041	0.03118	0.0004552	-0.05999	0.001762	0.064	3001	5000
Zv9_00041145 Zv9_00041144	1.36327	1.51571	1.77005	2.08047	2.44281	13.385	23.2487	25.6878		pi.1[5707]	0.7391	0.2266	0.004578	0.1632	0.7983	0.9928	3001	5000		beta.i[5707]	-0.0002986	0.03156	0.0004993	-0.0628	1.862e-05	0.06096	3001	5000
Zv9_00000399	95.065	30.6852	43.5796	23.5881	2.56389	5.68963	6.36586	8.13341		pi.1[68]	0.4785	0.1474	0.001972	0.1633	0.4913	0.7325	3001	5000		beta.i[68]	0.004105	0.03169	0.0005597	-0.05769	0.003489	0.06589	3001	5000
Zv9_00012847 Zv9_00012842 Zv9_00012846 Zv9_00012848 Zv9_00012844 Zv9_00012845 Zv9_00012849 Zv9_00012843	1	1	1	1	1	19.8325	35.3457	35.5287		pi.1[1812]	0.7264	0.2251	0.005141	0.1633	0.7825	0.9896	3001	5000		beta.i[1812]	1.565e-05	0.03183	0.0005	-0.06252	0.0003968	0.06198	3001	5000
Zv9_00054617	64.3635	34.425	42.6851	36.4326	13.4286	1.20102	1.07017	1		pi.1[7581]	0.4973	0.1506	0.002295	0.1633	0.5134	0.7524	3001	5000		beta.i[7581]	0.002687	0.03116	0.0005524	-0.05865	0.003447	0.06249	3001	5000
Zv9_00015626 Zv9_00015625 Zv9_00015627	54.1988	28.5256	29.1019	6.77147	5.7553	7.27612	7.04854	9.53781		pi.1[2161]	0.5056	0.154	0.002717	0.1634	0.5187	0.7605	3001	5000		beta.i[2161]	0.002342	0.03207	0.0005036	-0.06134	0.001933	0.06574	3001	5000
Zv9_00009497	75.8098	23.9152	16.1892	14.5875	22.7667	8.21955	5.48033	1.96565		pi.1[1361]	0.4932	0.1483	0.002011	0.1635	0.5066	0.7423	3001	5000		beta.i[1361]	0.003202	0.03163	0.0005366	-0.05795	0.00283	0.06611	3001	5000
Zv9_00023727 Zv9_00023726 Zv9_00023725 Zv9_00023728	1.40516	1.32095	2.29611	10.3363	16.7396	5.51983	5.55632	60.8244		pi.1[3298]	0.7497	0.2286	0.006232	0.1635	0.8158	0.9933	3001	5000		beta.i[3298]	0.0005082	0.0313	0.0005542	-0.06209	0.0005137	0.06111	3001	5000
Zv9_00029257 Zv9_00029253 Zv9_00029252 Zv9_00029255 Zv9_00029254 Zv9_00029256	68.2771	21.9227	11.4054	13.1439	10.1751	10.2156	8.09893	7.40141		pi.1[4036]	0.4939	0.1546	0.002235	0.1635	0.5099	0.7511	3001	5000		beta.i[4036]	0.002861	0.0318	0.000483	-0.05942	0.002766	0.06512	3001	5000
Zv9_00032179	1.4545	1.00705	15.0798	35.9343	12.0542	4.51702	3.67245	6.63875		pi.1[4476]	0.708	0.2293	0.005407	0.1635	0.7592	0.9903	3001	5000		beta.i[4476]	0.0004258	0.03123	0.0005444	-0.06129	0.0008753	0.06111	3001	5000
Zv9_00014289 Zv9_00014290	1.04324	1.11515	1	1.02939	1.53949	39.3678	42.889	14.7508		pi.1[1981]	0.7051	0.227	0.004929	0.1637	0.7539	0.9898	3001	5000		beta.i[1981]	0.0004656	0.03115	0.0005109	-0.06115	0.0004449	0.06099	3001	5000
Zv9_00047055 Zv9_00047058 Zv9_00047057 Zv9_00047056	4.79694	4.18376	6.28922	2.43614	11.3915	12.9103	8.86904	23.0342		pi.1[6559]	0.6736	0.2107	0.004548	0.1637	0.7152	0.9598	3001	5000		beta.i[6559]	0.001503	0.03221	0.0004925	-0.06155	0.001109	0.06571	3001	5000
Zv9_00008780 Zv9_00008779	1.58906	1.43096	19.0031	26.2468	12.1028	5.10795	4.32632	2.70982		pi.1[1223]	0.7094	0.2273	0.005384	0.1638	0.7532	0.9918	3001	5000		beta.i[1223]	0.001799	0.03181	0.0004875	-0.0604	0.001922	0.06423	3001	5000
Zv9_00021282 Zv9_00021280 Zv9_00021281	185.89	28.2094	11.5978	20.371	8.91572	12.7416	12.1881	12.5832		pi.1[2965]	0.463	0.1383	0.001847	0.1638	0.4745	0.7046	3001	5000		beta.i[2965]	0.003158	0.0322	0.0005737	-0.05946	0.003473	0.06547	3001	5000
Zv9_00010837 Zv9_00010840 Zv9_00010836 Zv9_00010838 Zv9_00010839	54.357	1	150.113	190.57	347.757	1	1	1		pi.1[1559]	0.4684	0.1457	0.002161	0.1641	0.4788	0.7249	3001	5000		beta.i[1559]	0.002968	0.03187	0.0007656	-0.06023	0.002953	0.06703	3001	5000
Zv9_00002746	24.7193	28.8242	24.068	28.1321	12.832	1.65754	1.35401	1.32175		pi.1[392]	0.538	0.1687	0.002489	0.1642	0.5558	0.8116	3001	5000		beta.i[392]	0.002368	0.03151	0.00047	-0.05937	0.002389	0.0647	3001	5000
Zv9_00002238 Zv9_00002237	1	1	1	14.9699	27.1362	9.05354	8.99127	6.74686		pi.1[321]	0.7119	0.2307	0.004422	0.1643	0.7618	0.9905	3001	5000		beta.i[321]	-0.0004492	0.03183	0.0004678	-0.06225	-0.0005086	0.06239	3001	5000
Zv9_00023720	1.0674	1.00135	1.09517	1.20871	1.88477	102.584	79.3854	7.28983		pi.1[3296]	0.6896	0.223	0.004357	0.1646	0.7323	0.9879	3001	5000		beta.i[3296]	0.001075	0.03169	0.0005111	-0.06058	0.001753	0.06223	3001	5000
Zv9_00008410 Zv9_00008406 Zv9_00008414 Zv9_00008413 Zv9_00008405 Zv9_00008407 Zv9_00008408 Zv9_00008412 Zv9_00008416 Zv9_00008415 Zv9_00008411 Zv9_00008409	46.9487	26.6002	1	1	8.70271	22.1125	19.1129	198.281		pi.1[1177]	0.5239	0.1604	0.002787	0.1647	0.5406	0.7883	3001	5000		beta.i[1177]	0.002641	0.03186	0.0005528	-0.06135	0.003107	0.06426	3001	5000
Zv9_00039636 Zv9_00039634 Zv9_00039635	82.4923	36.8425	16.7942	8.6775	11.4019	9.43005	8.14854	5.25998		pi.1[5503]	0.494	0.1486	0.002064	0.1647	0.5084	0.7398	3001	5000		beta.i[5503]	0.003227	0.03174	0.0005506	-0.0591	0.003741	0.0651	3001	5000
Zv9_00046297 Zv9_00046296	5.05172	3.11458	4.35169	4.86149	4.0736	10.2096	11.6199	27.4168		pi.1[6454]	0.6824	0.2129	0.004167	0.1647	0.7264	0.9629	3001	5000		beta.i[6454]	0.001261	0.03124	0.0004313	-0.05818	0.0004228	0.06385	3001	5000
Zv9_00004740	15.2264	22.8224	28.7067	34.2581	8.58218	1.36094	1.11667	1		pi.1[687]	0.5636	0.1769	0.002452	0.1649	0.5846	0.8469	3001	5000		beta.i[687]	0.001533	0.03188	0.0004691	-0.06342	0.001788	0.06488	3001	5000
Zv9_00014720 Zv9_00014717 Zv9_00014719 Zv9_00014718	16.0711	31.3548	22.1535	12.7339	2.92861	8.09083	6.26095	4.18443		pi.1[2030]	0.5684	0.1758	0.003367	0.165	0.5898	0.8477	3001	5000		beta.i[2030]	0.002211	0.03206	0.0004688	-0.06169	0.002424	0.06523	3001	5000
Zv9_00011209	1.05534	1.09151	2.0749	6.10806	21.6175	11.5083	9.92074	10.585		pi.1[1605]	0.7276	0.2296	0.005918	0.1651	0.7874	0.9926	3001	5000		beta.i[1605]	0.000662	0.03153	0.0004304	-0.06056	0.0009783	0.06048	3001	5000
Zv9_00031727 Zv9_00031726	4.77499	3.25462	2.12686	1.92222	3.85478	32.7796	34.7775	12.8232		pi.1[4411]	0.6702	0.2085	0.004146	0.1652	0.7091	0.9611	3001	5000		beta.i[4411]	0.001319	0.03193	0.0005389	-0.06162	0.001731	0.0641	3001	5000
Zv9_00051657 Zv9_00051655 Zv9_00051656	126.312	42.1302	10.3064	4.36061	15.8961	11.373	11.7407	18.0764		pi.1[7201]	0.4772	0.147	0.002324	0.1652	0.491	0.724	3001	5000		beta.i[7201]	0.00374	0.0316	0.0005734	-0.05822	0.00358	0.06531	3001	5000
Zv9_00004099 Zv9_00004097 Zv9_00004101 Zv9_00004100 Zv9_00004098 Zv9_00004102 Zv9_00004103 Zv9_00004096 Zv9_00004104	1	1	1	18.4127	21.5923	10.7979	9.92126	8.24307		pi.1[580]	0.7138	0.2246	0.004836	0.1653	0.7644	0.99	3001	5000		beta.i[580]	-0.0002105	0.03155	0.0004764	-0.06194	-0.0002154	0.06126	3001	5000
Zv9_00004618	58.1278	22.4338	16.0947	7.02236	7.74286	10.7849	8.84028	11.3724		pi.1[668]	0.5051	0.1531	0.00192	0.1655	0.5175	0.7633	3001	5000		beta.i[668]	0.003671	0.03177	0.0004741	-0.0575	0.003723	0.0678	3001	5000
Zv9_00007789 Zv9_00007788	38.7793	21.8179	24.3044	13.2952	4.36391	7.32297	6.55336	4.67767		pi.1[1089]	0.5171	0.1614	0.002535	0.1655	0.5324	0.7776	3001	5000		beta.i[1089]	0.003298	0.03094	0.0005467	-0.05905	0.003012	0.06373	3001	5000
Zv9_00023818 Zv9_00023819	16.7958	14.1007	18.1872	28.824	7.64229	4.56869	3.85702	1.47422		pi.1[3308]	0.5565	0.1773	0.002501	0.1656	0.5778	0.8397	3001	5000		beta.i[3308]	0.002482	0.03183	0.0004621	-0.06055	0.002548	0.06541	3001	5000
Zv9_00026987	1	1	1.69315	5.16791	13.2421	6.98619	13.9311	20.9586		pi.1[3730]	0.7322	0.2261	0.005792	0.1657	0.7894	0.991	3001	5000		beta.i[3730]	-0.0003976	0.03123	0.0004157	-0.06069	-0.0004758	0.06042	3001	5000
Zv9_00036726 Zv9_00036725	60.6696	4.52624	6.01977	29.5188	15.3801	16.6183	16.4774	19.2697		pi.1[5097]	0.4978	0.1536	0.002253	0.1657	0.5114	0.7562	3001	5000		beta.i[5097]	0.004193	0.03194	0.0004996	-0.05758	0.003957	0.06721	3001	5000
Zv9_00046233	48.0045	55.2978	65.7759	16.5988	1.90509	1	1	1		pi.1[6443]	0.5006	0.1576	0.002484	0.1657	0.5121	0.7642	3001	5000		beta.i[6443]	0.003117	0.03133	0.0005206	-0.05764	0.003402	0.06467	3001	5000
Zv9_00028241 Zv9_00028239 Zv9_00028240 Zv9_00028238	2.25502	8.31222	22.1013	23.6103	33.921	1	1	1		pi.1[3896]	0.672	0.2241	0.004473	0.1658	0.7031	0.9821	3001	5000		beta.i[3896]	0.0006572	0.03193	0.0005244	-0.06069	0.0004012	0.06356	3001	5000
Zv9_00028944 Zv9_00028943	83.6732	27.4327	43.9066	24.5106	5.24777	4.05592	3.79074	5.15477		pi.1[3999]	0.4854	0.1487	0.002278	0.1658	0.4994	0.7394	3001	5000		beta.i[3999]	0.003443	0.0315	0.0006005	-0.05781	0.003906	0.06483	3001	5000
Zv9_00011349	1.13827	1.01895	1.02279	1.20377	2.91377	33.2334	29.5072	11.8001		pi.1[1632]	0.7136	0.2301	0.005308	0.166	0.7686	0.992	3001	5000		beta.i[1632]	0.00106	0.03166	0.0005215	-0.06137	0.001649	0.06237	3001	5000
Zv9_00033266	63.4884	19.5439	14.0846	10.2289	10.9344	11.9008	9.8338	7.45546		pi.1[4619]	0.5034	0.1506	0.002497	0.1662	0.5197	0.7512	3001	5000		beta.i[4619]	0.002943	0.0315	0.000575	-0.05846	0.002378	0.06511	3001	5000
Zv9_00047929 Zv9_00047930	49.851	31.3148	22.3448	8.1321	7.9482	7.53451	7.2798	4.5024		pi.1[6686]	0.513	0.1577	0.002525	0.1662	0.5263	0.771	3001	5000		beta.i[6686]	0.002704	0.03111	0.0004151	-0.05869	0.003105	0.06253	3001	5000
Zv9_00022587 Zv9_00022585 Zv9_00022586	1	39.34	63.6096	81.2045	1	1	1	1		pi.1[3126]	0.6582	0.2225	0.004496	0.1667	0.6856	0.9822	3001	5000		beta.i[3126]	0.0004533	0.03199	0.0005442	-0.06358	0.000644	0.06252	3001	5000
Zv9_00053696 Zv9_00053698 Zv9_00053697	1.61126	2.90524	4.19352	5.66437	2.66263	17.6896	13.4886	18.5447		pi.1[7478]	0.7362	0.2212	0.004951	0.1667	0.7938	0.9914	3001	5000		beta.i[7478]	0.001272	0.03141	0.00048	-0.06107	0.001454	0.06287	3001	5000
Zv9_00011266 Zv9_00011262 Zv9_00011263 Zv9_00011264 Zv9_00011265	805.056	1	549.045	951.944	551.967	1	1	1		pi.1[1617]	0.3997	0.1122	0.001886	0.1668	0.4063	0.6016	3001	5000		beta.i[1617]	0.005507	0.0332	0.001231	-0.05775	0.004278	0.07252	3001	5000
Zv9_00007258 Zv9_00007259	61.3751	15.4771	8.3683	15.4617	15.9085	18.3535	13.6385	3.41151		pi.1[1020]	0.5034	0.152	0.001945	0.1669	0.5157	0.7605	3001	5000		beta.i[1020]	0.002811	0.03132	0.0005221	-0.05973	0.002901	0.06376	3001	5000
Zv9_00012077 Zv9_00012078	1.01377	1.01629	1.25947	2.28533	24.4699	17.4016	13.1286	9.7957		pi.1[1717]	0.7222	0.2308	0.005099	0.1669	0.7817	0.9917	3001	5000		beta.i[1717]	-0.0004415	0.03119	0.0004518	-0.06124	-0.0003151	0.06031	3001	5000
Zv9_00010384 Zv9_00010386 Zv9_00010385	3.08171	5.45361	14.8772	19.7138	9.98132	4.0606	2.80965	2.59175		pi.1[1504]	0.6855	0.2198	0.004968	0.1673	0.7263	0.9799	3001	5000		beta.i[1504]	0.001041	0.03175	0.0004538	-0.05844	0.0002867	0.06509	3001	5000
Zv9_00020294 Zv9_00020290 Zv9_00020287 Zv9_00020285 Zv9_00020284 Zv9_00020286 Zv9_00020295 Zv9_00020293 Zv9_00020296 Zv9_00020292 Zv9_00020289 Zv9_00020291 Zv9_00020288 Zv9_00020283	14.8197	24.8885	26.5052	11.4733	8.02545	3.8624	2.91448	2.40428		pi.1[2826]	0.5706	0.1786	0.002869	0.1673	0.5925	0.8453	3001	5000		beta.i[2826]	0.001755	0.03203	0.0004471	-0.06104	0.001346	0.06631	3001	5000
Zv9_00003540 Zv9_00003539	47.4196	9.7713	7.91556	10.9457	25.1519	13.4183	11.0154	8.20598		pi.1[508]	0.5151	0.1586	0.002532	0.1674	0.5336	0.7706	3001	5000		beta.i[508]	0.002524	0.03112	0.0004279	-0.05824	0.002838	0.06306	3001	5000
Zv9_00010897 Zv9_00010896	79.7651	46.8679	24.3356	7.2182	11.3011	8.48364	6.90438	5.12206		pi.1[1566]	0.4984	0.1488	0.002168	0.1676	0.5113	0.7506	3001	5000		beta.i[1566]	0.002713	0.03177	0.0005306	-0.05851	0.003273	0.0641	3001	5000
Zv9_00012334 Zv9_00012335	90.911	40.3433	67.6429	19.5114	4.19368	3.43352	3.10184	3.87759		pi.1[1749]	0.4901	0.1471	0.002339	0.1677	0.5037	0.7389	3001	5000		beta.i[1749]	0.003121	0.03134	0.0005532	-0.05903	0.003249	0.06313	3001	5000
Zv9_00003138 Zv9_00003137 Zv9_00003140 Zv9_00003141 Zv9_00003139 Zv9_00003136	41.325	21.5509	16.1121	7.40535	3.51614	14.5239	15.3393	16.4483		pi.1[451]	0.5314	0.1567	0.00241	0.1679	0.5482	0.786	3001	5000		beta.i[451]	0.002489	0.03156	0.0004436	-0.05841	0.002304	0.06477	3001	5000
Zv9_00026279	3.34997	14.4436	22.9491	27.0614	2.05613	4.65394	4.43114	5.39764		pi.1[3632]	0.6725	0.2167	0.004064	0.168	0.7099	0.9747	3001	5000		beta.i[3632]	0.001147	0.0312	0.0004945	-0.06135	0.001306	0.06066	3001	5000
Zv9_00055331 Zv9_00055332	42.1758	19.8483	18.8432	13.3007	8.52331	4.7346	5.42875	10.5699		pi.1[7675]	0.5191	0.1617	0.002459	0.1681	0.5378	0.7836	3001	5000		beta.i[7675]	0.002408	0.03152	0.0004908	-0.05944	0.002136	0.06317	3001	5000
Zv9_00004467 Zv9_00004466	24.7958	40.3475	13.2795	7.19608	4.57205	9.2995	7.78053	6.65033		pi.1[644]	0.5454	0.1695	0.002781	0.1683	0.563	0.821	3001	5000		beta.i[644]	0.00212	0.03207	0.0005327	-0.06105	0.002902	0.06454	3001	5000
Zv9_00022563 Zv9_00022564 Zv9_00022567 Zv9_00022565 Zv9_00022568 Zv9_00022566	34.9235	25.0123	12.5266	6.03483	3.43114	11.2395	12.5259	15.3898		pi.1[3123]	0.5307	0.1635	0.00294	0.1683	0.5532	0.7907	3001	5000		beta.i[3123]	0.003001	0.03156	0.0005039	-0.0589	0.003017	0.06544	3001	5000
Zv9_00006671	1	1	7.5709	22.1335	12.529	6.91199	5.70676	8.10843		pi.1[932]	0.7302	0.2237	0.005118	0.1684	0.7866	0.9911	3001	5000		beta.i[932]	0.001003	0.03174	0.0004574	-0.06056	0.001065	0.06254	3001	5000
Zv9_00036472 Zv9_00036471	45.1215	24.7903	16.454	10.8408	11.0876	8.14325	6.39529	5.30135		pi.1[5060]	0.5153	0.1604	0.002633	0.1684	0.5325	0.7748	3001	5000		beta.i[5060]	0.002567	0.03139	0.0004534	-0.06121	0.002701	0.06365	3001	5000
Zv9_00036833 Zv9_00036834 Zv9_00036831 Zv9_00036832	1	1.02028	1.01157	1.01146	5.8319	27.7933	24.6744	11.4349		pi.1[5112]	0.7078	0.2292	0.005102	0.1684	0.7572	0.9911	3001	5000		beta.i[5112]	0.0002724	0.0312	0.0004496	-0.06169	0.0004173	0.05977	3001	5000
Zv9_00009801 Zv9_00009803 Zv9_00009804 Zv9_00009802	120.477	68.4837	102.086	20.9751	1.17146	2.15554	1.97967	5.30722		pi.1[1411]	0.4708	0.1418	0.002299	0.1685	0.4824	0.7161	3001	5000		beta.i[1411]	0.003946	0.03168	0.0005691	-0.05762	0.003461	0.06706	3001	5000
Zv9_00053738	47.2227	32.8565	36.5094	28.6382	9.94166	1.11744	1.04002	1.0048		pi.1[7483]	0.5054	0.1576	0.002715	0.1685	0.5206	0.7708	3001	5000		beta.i[7483]	0.002015	0.03094	0.0004851	-0.05836	0.001959	0.06234	3001	5000
Zv9_00046993 Zv9_00046995 Zv9_00046991 Zv9_00046994 Zv9_00046992	1	1	1	1.20499	1.49583	84.1509	29.3566	26.502		pi.1[6553]	0.7144	0.2241	0.004703	0.1688	0.7596	0.9894	3001	5000		beta.i[6553]	0.001441	0.03121	0.0004416	-0.05983	0.001084	0.06334	3001	5000
Zv9_00004485	9.55402	4.55477	7.68946	10.3012	7.44749	31.2221	12.9166	4.23817		pi.1[646]	0.6082	0.1879	0.00346	0.169	0.6339	0.8923	3001	5000		beta.i[646]	0.002241	0.032	0.0004665	-0.06147	0.002172	0.06496	3001	5000
Zv9_00006432 Zv9_00006434 Zv9_00006435 Zv9_00006431 Zv9_00006433	35.2212	23.8637	39.5523	12.4417	2.44432	8.94348	8.4664	10.8091		pi.1[900]	0.5348	0.1631	0.002919	0.1691	0.555	0.7942	3001	5000		beta.i[900]	0.002687	0.03145	0.0004581	-0.05873	0.002418	0.06421	3001	5000
Zv9_00017395	85.6839	40.0298	15.4869	10.0468	10.9097	8.86993	8.79445	5.26218		pi.1[2413]	0.4927	0.1496	0.002145	0.1691	0.5038	0.7463	3001	5000		beta.i[2413]	0.00359	0.03169	0.0005281	-0.05863	0.003249	0.06571	3001	5000
Zv9_00038298 Zv9_00038296 Zv9_00038297	3.83598	3.4468	2.79551	7.36178	16.0813	5.37123	7.51678	18.6199		pi.1[5328]	0.6875	0.2197	0.003698	0.1691	0.733	0.9748	3001	5000		beta.i[5328]	0.002363	0.03085	0.000414	-0.05708	0.002155	0.06306	3001	5000
Zv9_00031859	39.177	39.5342	19.6294	9.62065	6.57528	5.90266	5.27635	4.3477		pi.1[4430]	0.527	0.1595	0.002431	0.1692	0.5433	0.7868	3001	5000		beta.i[4430]	0.002836	0.03149	0.000549	-0.05899	0.003169	0.06563	3001	5000
Zv9_00044182	18.8958	38.1166	10.7742	8.61287	1.34055	6.60027	11.8511	25.9964		pi.1[6125]	0.5657	0.1732	0.002361	0.1693	0.5862	0.8342	3001	5000		beta.i[6125]	0.002457	0.03171	0.0004965	-0.06004	0.002496	0.06501	3001	5000
Zv9_00020369	10.9931	6.87548	11.2945	17.3206	126.116	4.12459	1.95318	1.15881		pi.1[2838]	0.5689	0.1823	0.003139	0.1694	0.5903	0.8597	3001	5000		beta.i[2838]	0.001529	0.0317	0.0005314	-0.06138	0.001331	0.06409	3001	5000
Zv9_00052874 Zv9_00052875	7.87638	30.4685	12.4523	8.32072	4.21174	6.61888	5.16648	5.7547		pi.1[7366]	0.615	0.1916	0.003249	0.1697	0.6472	0.895	3001	5000		beta.i[7366]	0.002427	0.0317	0.0004378	-0.05976	0.002433	0.06588	3001	5000
Zv9_00047109	104.141	27.9102	19.33	12.6005	4.3231	9.44579	9.60185	11.8148		pi.1[6569]	0.4778	0.1453	0.002414	0.1698	0.4883	0.7275	3001	5000		beta.i[6569]	0.003184	0.03183	0.0005733	-0.05919	0.00337	0.06659	3001	5000
Zv9_00048862	214.097	71.4666	24.3143	16.4513	17.159	25.822	1	1		pi.1[6825]	0.4533	0.133	0.001767	0.1698	0.4604	0.6847	3001	5000		beta.i[6825]	0.003572	0.03213	0.0005986	-0.05966	0.004457	0.06562	3001	5000
Zv9_00013514 Zv9_00013513 Zv9_00013515	85.3564	11.2112	7.65247	14.3873	17.5822	14.827	14.9521	18.0711		pi.1[1888]	0.4958	0.1483	0.002226	0.1699	0.5091	0.7487	3001	5000		beta.i[1888]	0.003057	0.03181	0.0005563	-0.06053	0.003259	0.06348	3001	5000
Zv9_00032696 Zv9_00032697	1.17649	1.00281	8.18002	27.6289	11.6767	5.17503	4.61063	11.6294		pi.1[4531]	0.7268	0.2252	0.005496	0.1699	0.7801	0.9916	3001	5000		beta.i[4531]	7.548e-05	0.03113	0.0004677	-0.06064	0.0001645	0.06136	3001	5000
Zv9_00023597 Zv9_00023598 Zv9_00023595 Zv9_00023596	10.4431	28.5852	30.5851	11.7081	6.47943	3.51135	2.79914	2.27816		pi.1[3277]	0.5949	0.1857	0.002821	0.1701	0.6203	0.8789	3001	5000		beta.i[3277]	0.001529	0.03122	0.0005217	-0.05907	0.001193	0.06257	3001	5000
Zv9_00031319 Zv9_00031318	8.01582	5.76383	5.73305	2.97435	1.60124	24.3047	28.2609	31.3437		pi.1[4330]	0.6311	0.1966	0.003654	0.1701	0.6672	0.9084	3001	5000		beta.i[4330]	0.001826	0.03182	0.0005186	-0.06048	0.002209	0.06394	3001	5000
Zv9_00026232 Zv9_00026233	64.2484	18.2077	7.84187	11.5598	27.1445	15.1624	13.8195	5.73623		pi.1[3627]	0.513	0.1501	0.002232	0.1702	0.5272	0.764	3001	5000		beta.i[3627]	0.00287	0.03192	0.0005762	-0.06003	0.002258	0.06814	3001	5000
Zv9_00056049 Zv9_00056046 Zv9_00056052 Zv9_00056047 Zv9_00056054 Zv9_00056048 Zv9_00056050 Zv9_00056053 Zv9_00056051	1	35.5859	50.4335	34.449	1	13.7309	12.9306	1		pi.1[7769]	0.6688	0.221	0.004267	0.1702	0.7027	0.9835	3001	5000		beta.i[7769]	0.0009865	0.03164	0.0004575	-0.06137	0.001204	0.06125	3001	5000
Zv9_00003801	63.8918	19.5679	28.0786	17.6994	7.21811	5.6035	7.20167	5.85338		pi.1[539]	0.4954	0.1531	0.002237	0.1703	0.5084	0.7581	3001	5000		beta.i[539]	0.002755	0.03173	0.0004843	-0.05941	0.002874	0.06454	3001	5000
Zv9_00045379 Zv9_00045378	116.975	21.4799	16.6125	8.68565	5.74178	10.9051	14.0754	19.4346		pi.1[6325]	0.4791	0.1453	0.002306	0.1703	0.492	0.7264	3001	5000		beta.i[6325]	0.003496	0.03177	0.0005548	-0.05901	0.003099	0.06565	3001	5000
Zv9_00049664	3.05986	3.24123	16.7654	28.1987	8.32202	5.91269	4.43357	2.62633		pi.1[6925]	0.6958	0.2189	0.004681	0.1703	0.7394	0.9834	3001	5000		beta.i[6925]	0.001856	0.03152	0.0004462	-0.05899	0.002192	0.06341	3001	5000
Zv9_00027138 Zv9_00027139	117.144	99.2142	62.7623	28.9422	1.59344	1.10453	1.05456	1		pi.1[3758]	0.4771	0.1409	0.001967	0.1704	0.4903	0.7151	3001	5000		beta.i[3758]	0.002505	0.03143	0.0005414	-0.05886	0.002744	0.06342	3001	5000
Zv9_00055394	116.29	25.2568	29.3517	63.8488	9.23345	7.01418	4.03894	1		pi.1[7686]	0.4751	0.1424	0.002221	0.1705	0.4842	0.7206	3001	5000		beta.i[7686]	0.002922	0.03193	0.0005464	-0.06027	0.002804	0.06415	3001	5000
Zv9_00016453	40.3359	38.8046	22.56	4.11802	19.1743	8.88751	7.27583	5.81124		pi.1[2289]	0.527	0.1574	0.002875	0.1706	0.5428	0.7845	3001	5000		beta.i[2289]	0.003214	0.03146	0.0005315	-0.05836	0.003497	0.06466	3001	5000
Zv9_00021729	138.731	44.1432	29.6198	7.01421	14.9826	7.78437	7.03736	6.50185		pi.1[3021]	0.4765	0.1393	0.001942	0.1706	0.4897	0.717	3001	5000		beta.i[3021]	0.002739	0.03117	0.0005854	-0.05789	0.002753	0.06486	3001	5000
Zv9_00034823 Zv9_00034824	3.31321	10.1281	7.08332	5.75273	1	19.6971	20.99	13.8683		pi.1[4837]	0.6891	0.2151	0.003961	0.1706	0.7281	0.9792	3001	5000		beta.i[4837]	0.001759	0.03163	0.0004307	-0.05867	0.0005982	0.06444	3001	5000
Zv9_00050032	1.00637	1.00699	1.14933	1.13119	5.82285	21.8924	19.3514	16.6731		pi.1[6972]	0.7241	0.2292	0.00449	0.1706	0.7799	0.9911	3001	5000		beta.i[6972]	0.00041	0.03133	0.0004825	-0.06248	0.0007638	0.06201	3001	5000
Zv9_00031853 Zv9_00031852	11.6671	10.6847	3.94157	2.66644	3.27083	23.3752	24.0837	20.2739		pi.1[4428]	0.6009	0.1836	0.002898	0.1707	0.6239	0.8773	3001	5000		beta.i[4428]	0.002417	0.03157	0.0004173	-0.05851	0.002337	0.06419	3001	5000
Zv9_00004001 Zv9_00004000	1.45155	1.60065	1.70384	1.27245	2.505	27.3719	29.4357	19.187		pi.1[567]	0.7301	0.223	0.005002	0.1711	0.7875	0.9932	3001	5000		beta.i[567]	0.0007522	0.03137	0.0004655	-0.0598	0.00101	0.06253	3001	5000
Zv9_00029760	1.02469	1.00793	1.12467	2.84218	25.4127	17.7253	13.2746	10.582		pi.1[4114]	0.7172	0.2265	0.005529	0.1712	0.7694	0.9898	3001	5000		beta.i[4114]	0.0007358	0.03174	0.0005074	-0.06023	0.0004928	0.0636	3001	5000
Zv9_00003592 Zv9_00003588 Zv9_00003583 Zv9_00003589 Zv9_00003584 Zv9_00003587 Zv9_00003591 Zv9_00003585 Zv9_00003590 Zv9_00003586	5.62892	24.0075	19.3007	5.5584	3.82417	5.93191	5.13196	6.37613		pi.1[517]	0.641	0.2014	0.003875	0.1713	0.6752	0.935	3001	5000		beta.i[517]	0.001846	0.03172	0.0004568	-0.06052	0.001605	0.06342	3001	5000
Zv9_00057075 Zv9_00057073 Zv9_00057076 Zv9_00057071 Zv9_00057074 Zv9_00057072	186.222	44.1787	19.5866	8.14282	19.0393	10.9088	8.85486	2.62495		pi.1[7903]	0.4547	0.136	0.00188	0.1713	0.4625	0.6954	3001	5000		beta.i[7903]	0.002561	0.03189	0.0005972	-0.05899	0.001948	0.06455	3001	5000
Zv9_00000026 Zv9_00000024 Zv9_00000029 Zv9_00000028 Zv9_00000025 Zv9_00000027 Zv9_00000030	194.107	9.11129	7.92928	13.0192	62.2526	33.835	25.2487	5.26626		pi.1[4]	0.4611	0.1324	0.001924	0.1714	0.4696	0.6889	3001	5000		beta.i[4]	0.003431	0.0312	0.0005459	-0.05655	0.003164	0.06305	3001	5000
Zv9_00006667	44.0672	26.7067	24.5791	16.9286	7.78892	4.76831	4.49803	3.8007		pi.1[930]	0.5164	0.1551	0.00237	0.1714	0.5312	0.7739	3001	5000		beta.i[930]	0.002522	0.03255	0.0004947	-0.0613	0.003514	0.06678	3001	5000
Zv9_00033875	2.33625	2.19468	31.5018	16.0391	48.5412	4.23339	1.62401	1.12136		pi.1[4719]	0.677	0.2234	0.004104	0.1714	0.7111	0.9863	3001	5000		beta.i[4719]	0.002139	0.03153	0.0004645	-0.05906	0.002436	0.06315	3001	5000
Zv9_00017420 Zv9_00017419	1.67265	1.47857	1.39841	1.02965	1.07558	22.8291	42.4018	17.6642		pi.1[2418]	0.7077	0.2287	0.00449	0.1715	0.7579	0.9894	3001	5000		beta.i[2418]	-0.0003466	0.0325	0.0004822	-0.06475	-0.0005678	0.06444	3001	5000
Zv9_00018547	1	1	1	1	1	43.9558	35.9424	24.6637		pi.1[2581]	0.709	0.2281	0.004616	0.1715	0.7616	0.9911	3001	5000		beta.i[2581]	0.0005405	0.03141	0.0004984	-0.0619	0.0003804	0.06347	3001	5000
Zv9_00022732 Zv9_00022736 Zv9_00022735 Zv9_00022737 Zv9_00022734 Zv9_00022733	60.6675	21.6633	21.1439	9.40889	11.817	11.458	9.91211	6.96568		pi.1[3154]	0.5104	0.1514	0.002639	0.1715	0.5242	0.7585	3001	5000		beta.i[3154]	0.001838	0.03182	0.0005225	-0.0615	0.001721	0.06461	3001	5000
Zv9_00025236 Zv9_00025232 Zv9_00025233 Zv9_00025230 Zv9_00025235 Zv9_00025238 Zv9_00025234 Zv9_00025229 Zv9_00025231 Zv9_00025237	1.55235	1	1.91825	1.68016	13.7295	17.5812	29.4414	8.06945		pi.1[3483]	0.7243	0.2276	0.005444	0.1715	0.7784	0.9927	3001	5000		beta.i[3483]	0.0001436	0.03207	0.0004202	-0.06263	-0.0003125	0.06341	3001	5000
Zv9_00038804 Zv9_00038807 Zv9_00038812 Zv9_00038805 Zv9_00038811 Zv9_00038809 Zv9_00038810 Zv9_00038806 Zv9_00038803 Zv9_00038808	1	43.1682	71.6622	1	1	34.3684	29.047	14.2593		pi.1[5395]	0.6646	0.2179	0.004059	0.1716	0.694	0.9782	3001	5000		beta.i[5395]	0.00119	0.03121	0.0005252	-0.05984	0.001894	0.06182	3001	5000
Zv9_00021399	41.7122	40.6695	51.8045	34.27	2.55816	1.05553	1	1		pi.1[2983]	0.5138	0.1569	0.00237	0.1717	0.5301	0.7693	3001	5000		beta.i[2983]	0.002188	0.03164	0.0005296	-0.05921	0.002668	0.06311	3001	5000
Zv9_00008754	33.7478	17.3187	22.8382	14.9315	10.1798	5.07106	5.06119	6.37602		pi.1[1221]	0.5309	0.163	0.002829	0.1719	0.5476	0.7998	3001	5000		beta.i[1221]	0.003705	0.03112	0.0004521	-0.05622	0.003135	0.06501	3001	5000
Zv9_00001607	1.0657	1.07756	3.00694	5.54335	12.5689	15.7591	10.9444	7.22551		pi.1[220]	0.7235	0.2277	0.00513	0.172	0.7837	0.9909	3001	5000		beta.i[220]	0.0007532	0.03141	0.0004633	-0.06153	0.0006705	0.06241	3001	5000
Zv9_00026545	19.7476	31.2978	43.0514	21.9853	5.45286	1.08323	1.0399	1.00942		pi.1[3662]	0.5496	0.1698	0.00263	0.1722	0.5704	0.8217	3001	5000		beta.i[3662]	0.001928	0.03167	0.0004864	-0.0588	0.00149	0.06464	3001	5000
Zv9_00031468	4.13868	6.71564	4.16489	2.90225	5.05933	13.1074	13.826	24.4845		pi.1[4368]	0.699	0.2116	0.004243	0.1722	0.7429	0.9714	3001	5000		beta.i[4368]	0.002115	0.03107	0.0005356	-0.05956	0.002581	0.06249	3001	5000
Zv9_00002151 Zv9_00002152	1	1	1	1	3.67359	10.0762	14.6469	79.7898		pi.1[308]	0.7551	0.225	0.005304	0.1724	0.8225	0.9931	3001	5000		beta.i[308]	0.0006276	0.03153	0.0005124	-0.06083	0.0003656	0.06455	3001	5000
Zv9_00000280 Zv9_00000277 Zv9_00000279 Zv9_00000278	48.3016	11.1096	14.738	16.9735	9.51814	11.3455	11.1463	9.40026		pi.1[50]	0.5162	0.1553	0.002403	0.1728	0.5309	0.7735	3001	5000		beta.i[50]	0.002219	0.03122	0.000509	-0.05941	0.00214	0.06497	3001	5000
Zv9_00015643 Zv9_00015633 Zv9_00015639 Zv9_00015636 Zv9_00015637 Zv9_00015642 Zv9_00015632 Zv9_00015638 Zv9_00015641 Zv9_00015644 Zv9_00015635 Zv9_00015640	1	1	1	14.3844	18.315	9.00728	10.9969	7.34688		pi.1[2163]	0.7129	0.2308	0.004939	0.1728	0.7633	0.9922	3001	5000		beta.i[2163]	0.0002953	0.03209	0.0005063	-0.06259	0.0005423	0.06165	3001	5000
Zv9_00016258 Zv9_00016257 Zv9_00016255 Zv9_00016256	74.2555	38.0155	16.8843	12.4498	5.47285	6.97143	8.35729	9.43111		pi.1[2258]	0.4987	0.1483	0.002294	0.173	0.5129	0.7472	3001	5000		beta.i[2258]	0.003476	0.03129	0.0006117	-0.05672	0.003322	0.06563	3001	5000
Zv9_00034904	1.08774	1.14958	1.41426	1.50969	1.62876	17.4932	27.6589	36.4608		pi.1[4851]	0.7363	0.2235	0.00526	0.173	0.7934	0.9922	3001	5000		beta.i[4851]	0.0006463	0.03188	0.0004288	-0.06171	0.001055	0.06242	3001	5000
Zv9_00054352 Zv9_00054351 Zv9_00054346 Zv9_00054344 Zv9_00054350 Zv9_00054345 Zv9_00054349 Zv9_00054348 Zv9_00054347	75.9032	30.7431	12.9186	3.93197	5.85278	11.9632	13.3793	19.714		pi.1[7549]	0.4947	0.1507	0.002307	0.1731	0.5085	0.7451	3001	5000		beta.i[7549]	0.00286	0.0322	0.0005356	-0.05907	0.003077	0.06628	3001	5000
Zv9_00036401	49.1846	18.8969	15.9472	9.2033	9.34491	11.2446	12.1078	6.96966		pi.1[5049]	0.5169	0.1572	0.002642	0.1732	0.5331	0.7731	3001	5000		beta.i[5049]	0.002569	0.03189	0.0005148	-0.05856	0.002371	0.06689	3001	5000
Zv9_00020556 Zv9_00020555 Zv9_00020557	385.273	15.1541	10.8658	19.5687	31.5731	23.348	17.6148	6.89573		pi.1[2870]	0.4362	0.1255	0.00203	0.1734	0.4436	0.6582	3001	5000		beta.i[2870]	0.004776	0.03179	0.0006514	-0.0563	0.004082	0.06845	3001	5000
Zv9_00034544	47.941	30.862	31.9235	11.1915	1.53632	11.0098	11.4494	10.2615		pi.1[4804]	0.5156	0.1529	0.002293	0.1734	0.5321	0.7712	3001	5000		beta.i[4804]	0.002661	0.03153	0.0005234	-0.05938	0.002865	0.06219	3001	5000
Zv9_00021465	1.1971	1.02456	1.06741	1.409	4.36445	5.65695	16.3983	88.6412		pi.1[2996]	0.7569	0.2237	0.005814	0.1735	0.8252	0.9926	3001	5000		beta.i[2996]	0.0005753	0.03164	0.0004865	-0.06125	0.0005988	0.06259	3001	5000
Zv9_00019485 Zv9_00019483 Zv9_00019484 Zv9_00019486	41.9476	31.0403	13.1141	5.81483	6.60116	9.21192	11.5495	17.2628		pi.1[2707]	0.5315	0.1574	0.00237	0.1737	0.5503	0.7879	3001	5000		beta.i[2707]	0.003164	0.0315	0.0004714	-0.05683	0.003153	0.06474	3001	5000
Zv9_00002936	11.6478	4.29657	7.66848	33.6419	16.8822	8.81199	6.73793	6.70037		pi.1[423]	0.5975	0.1845	0.00266	0.1738	0.6236	0.8783	3001	5000		beta.i[423]	0.001799	0.03153	0.0004211	-0.06178	0.001896	0.06223	3001	5000
Zv9_00017450	1	1.0549	1	1.03164	3.66585	32.4982	44.0829	10.4095		pi.1[2422]	0.7154	0.2207	0.004972	0.1738	0.7605	0.9909	3001	5000		beta.i[2422]	0.0002838	0.03133	0.000437	-0.06065	0.0001658	0.06145	3001	5000
Zv9_00041421	1	1	1	1	1	6.41371	12.3852	346.919		pi.1[5739]	0.7648	0.2266	0.004734	0.1738	0.8342	0.994	3001	5000		beta.i[5739]	0.001134	0.03151	0.0005984	-0.06021	0.001348	0.06288	3001	5000
Zv9_00014828	26.4133	11.0597	21.2364	20.7317	4.03679	8.0147	6.83255	43.9416		pi.1[2048]	0.5561	0.1652	0.002691	0.1739	0.5796	0.8148	3001	5000		beta.i[2048]	0.002837	0.03187	0.0005122	-0.06003	0.003087	0.06457	3001	5000
Zv9_00031305	57.2714	16.8164	12.3573	19.6333	14.1467	13.5022	8.52795	3.17904		pi.1[4327]	0.5092	0.1547	0.002239	0.174	0.5243	0.7658	3001	5000		beta.i[4327]	0.002507	0.03148	0.0004039	-0.05869	0.002251	0.06507	3001	5000
Zv9_00040243 Zv9_00040242	2.67311	1.81939	3.4561	66.9699	9.12814	16.134	8.85828	3.79482		pi.1[5581]	0.6803	0.2233	0.004545	0.174	0.7166	0.9841	3001	5000		beta.i[5581]	0.00111	0.0308	0.0005152	-0.06111	0.001202	0.06147	3001	5000
Zv9_00034715 Zv9_00034716	112.008	65.9033	17.7017	11.3478	9.01288	8.24552	6.05456	4.39145		pi.1[4822]	0.4823	0.141	0.002074	0.1741	0.4937	0.7225	3001	5000		beta.i[4822]	0.003084	0.03148	0.0005804	-0.05897	0.002463	0.06494	3001	5000
Zv9_00006687 Zv9_00006686	1	1	6.90063	18.0177	11.2242	8.04914	7.26346	9.4827		pi.1[935]	0.739	0.2188	0.005053	0.1744	0.7957	0.9917	3001	5000		beta.i[935]	0.0008957	0.03129	0.0004575	-0.06146	0.0004844	0.06126	3001	5000
Zv9_00023613 Zv9_00023610 Zv9_00023612 Zv9_00023611	52.5665	31.3245	10.8176	9.68927	11.0408	9.75575	7.07883	6.93227		pi.1[3279]	0.5091	0.1547	0.002404	0.1745	0.5244	0.7686	3001	5000		beta.i[3279]	0.003713	0.03138	0.0006075	-0.05806	0.004182	0.06446	3001	5000
Zv9_00034148 Zv9_00034146 Zv9_00034147 Zv9_00034145	1	1.05529	1.06735	1.27055	53.7024	17.3054	14.5401	15.5755		pi.1[4750]	0.7104	0.2218	0.004259	0.1746	0.7578	0.9906	3001	5000		beta.i[4750]	-9.068e-05	0.03186	0.0005919	-0.06152	-0.0003078	0.06073	3001	5000
Zv9_00051389 Zv9_00051386 Zv9_00051387 Zv9_00051391 Zv9_00051390	44.1651	10.8798	10.1353	15.5372	17.7935	10.8843	11.6304	8.5489		pi.1[7169]	0.5205	0.1599	0.002473	0.1746	0.5355	0.7805	3001	5000		beta.i[7169]	0.002552	0.03162	0.0005015	-0.05961	0.002782	0.06454	3001	5000
Zv9_00051846 Zv9_00051845	1	1.21052	1.32991	1.96017	9.2235	19.8134	18.6397	14.3272		pi.1[7221]	0.7362	0.2239	0.004956	0.1747	0.793	0.9928	3001	5000		beta.i[7221]	0.001354	0.03137	0.0005476	-0.05986	0.001915	0.06246	3001	5000
Zv9_00011484 Zv9_00011485	1.30606	1.01673	9.04004	8.74422	28.8378	15.0023	6.26821	1.90459		pi.1[1652]	0.7098	0.2232	0.004929	0.1749	0.7532	0.9897	3001	5000		beta.i[1652]	0.0007687	0.03157	0.0004708	-0.06083	0.0008194	0.06271	3001	5000
Zv9_00028882	100.181	9.55831	8.17947	25.1517	23.8195	18.7288	16.297	4.87331		pi.1[3992]	0.4812	0.141	0.002158	0.1749	0.4916	0.7212	3001	5000		beta.i[3992]	0.003434	0.03202	0.0005344	-0.05655	0.002705	0.06664	3001	5000
Zv9_00031409 Zv9_00031407 Zv9_00031408	1.89026	12.3094	13.5763	13.0322	8.87493	4.20103	3.52417	2.67085		pi.1[4355]	0.7105	0.2244	0.004245	0.1749	0.7593	0.9869	3001	5000		beta.i[4355]	0.001857	0.03134	0.0004573	-0.05897	0.001749	0.064	3001	5000
Zv9_00053534 Zv9_00053531 Zv9_00053532 Zv9_00053535 Zv9_00053530 Zv9_00053533	48.7384	10.2362	8.13504	9.70602	5.28842	9.10139	14.4398	126.059		pi.1[7452]	0.5388	0.158	0.002663	0.1751	0.5602	0.7849	3001	5000		beta.i[7452]	0.002663	0.03142	0.0005109	-0.05986	0.002782	0.06504	3001	5000
Zv9_00043265	182.891	28.1787	15.9957	9.99888	24.1121	15.4869	12.5802	8.09974		pi.1[5978]	0.4707	0.1345	0.001883	0.1752	0.4825	0.7038	3001	5000		beta.i[5978]	0.003752	0.0314	0.0005359	-0.05868	0.004442	0.0636	3001	5000
Zv9_00044051 Zv9_00044053 Zv9_00044052 Zv9_00044050 Zv9_00044048 Zv9_00044049	256.595	97.2903	32.5018	10.3384	1.34512	10.3972	12.0997	11.0168		pi.1[6100]	0.4512	0.1323	0.001834	0.1752	0.4609	0.6816	3001	5000		beta.i[6100]	0.004335	0.03131	0.0005867	-0.05734	0.004326	0.06656	3001	5000
Zv9_00044741	1.11227	1.03592	3.78502	6.57428	7.47229	7.92586	9.92965	23.9874		pi.1[6220]	0.7378	0.2311	0.004767	0.1752	0.7989	0.994	3001	5000		beta.i[6220]	0.0007046	0.0316	0.0004519	-0.06114	0.000664	0.06368	3001	5000
Zv9_00000944 Zv9_00000945 Zv9_00000946	1	1	1	4.0228	2.56142	2.68782	38.103	90.9902		pi.1[138]	0.7596	0.2227	0.005731	0.1753	0.8249	0.9941	3001	5000		beta.i[138]	0.001324	0.03185	0.0004966	-0.05925	0.001336	0.06505	3001	5000
Zv9_00030785 Zv9_00030786	7.57282	10.9919	22.6407	29.2523	9.54875	34.0565	1	1		pi.1[4256]	0.6078	0.1911	0.003177	0.1755	0.6313	0.9012	3001	5000		beta.i[4256]	0.001682	0.03181	0.0004982	-0.06024	0.001622	0.06269	3001	5000
Zv9_00047721 Zv9_00047720	21.4209	27.1965	19.1494	8.89018	9.5008	6.62383	5.82963	4.12904		pi.1[6657]	0.5596	0.1695	0.00256	0.1755	0.579	0.8301	3001	5000		beta.i[6657]	0.002797	0.03101	0.000476	-0.05655	0.002717	0.06448	3001	5000
Zv9_00044731 Zv9_00044729 Zv9_00044732 Zv9_00044730	88.5527	30.7881	24.4411	11.3339	13.8204	10.5153	7.61363	5.50458		pi.1[6216]	0.4983	0.145	0.002121	0.1756	0.5097	0.745	3001	5000		beta.i[6216]	0.004049	0.03157	0.0005372	-0.0581	0.003741	0.06551	3001	5000
Zv9_00007782	1.03196	1.16626	1.09791	1.27941	1.37697	2.43338	23.7083	122.058		pi.1[1088]	0.7442	0.2249	0.004908	0.1757	0.8062	0.9938	3001	5000		beta.i[1088]	-3.051e-05	0.0314	0.0004638	-0.06103	1.719e-05	0.06139	3001	5000
Zv9_00014771 Zv9_00014769 Zv9_00014770	41.839	50.3687	35.0598	7.21512	1.64602	7.0264	7.01208	11.6431		pi.1[2037]	0.5204	0.1561	0.002598	0.1757	0.533	0.7817	3001	5000		beta.i[2037]	0.002679	0.03113	0.000576	-0.05782	0.002545	0.06229	3001	5000
Zv9_00057506 Zv9_00057504 Zv9_00057505 Zv9_00057503	22.1194	14.4837	7.0938	8.39823	6.61967	9.89351	8.89728	33.4258		pi.1[7983]	0.5679	0.17	0.003253	0.1757	0.5912	0.8323	3001	5000		beta.i[7983]	0.00216	0.03156	0.0004645	-0.06137	0.002746	0.06314	3001	5000
Zv9_00038929 Zv9_00038928 Zv9_00038927	2.15381	1.67297	1.66355	4.07842	6.64619	12.7448	14.0047	18.8458		pi.1[5414]	0.7353	0.2264	0.00472	0.1758	0.7947	0.9926	3001	5000		beta.i[5414]	0.001077	0.03144	0.0004867	-0.06041	0.0004646	0.06352	3001	5000
Zv9_00034480 Zv9_00034479	49.1316	18.908	21.9478	14.5278	5.16524	11.6667	8.54265	5.33728		pi.1[4796]	0.5102	0.1544	0.002211	0.176	0.5207	0.772	3001	5000		beta.i[4796]	0.002471	0.03174	0.0004751	-0.05926	0.002146	0.06493	3001	5000
Zv9_00050345	16.7031	28.0432	27.9276	12.4308	1.31614	7.95907	4.44825	20.8096		pi.1[7022]	0.565	0.1775	0.003039	0.176	0.5844	0.8399	3001	5000		beta.i[7022]	0.002843	0.03158	0.000451	-0.06116	0.003694	0.06348	3001	5000
Zv9_00041728	48.2068	22.0426	23.2144	17.2614	11.2728	9.36698	7.34841	2.35358		pi.1[5788]	0.5197	0.1543	0.002366	0.1761	0.5362	0.7732	3001	5000		beta.i[5788]	0.00217	0.03139	0.0004679	-0.05934	0.002288	0.06448	3001	5000
Zv9_00041930 Zv9_00041931	1.61301	1.21354	2.94879	2.33501	2.04164	20.9096	24.7818	19.8465		pi.1[5812]	0.7368	0.2225	0.005328	0.1761	0.794	0.992	3001	5000		beta.i[5812]	0.0008612	0.03155	0.0005526	-0.06102	0.0009657	0.06406	3001	5000
Zv9_00050523	1	1.01866	1.03587	1.24447	1.63347	45.0073	44.7965	17.0267		pi.1[7051]	0.7173	0.2227	0.005041	0.1761	0.7644	0.9918	3001	5000		beta.i[7051]	0.0007536	0.03108	0.0005111	-0.06004	0.0005258	0.06301	3001	5000
Zv9_00039288	5.234	4.24949	50.6215	32.3588	8.30946	2.88514	2.39062	2.9963		pi.1[5457]	0.6438	0.2055	0.004012	0.1764	0.676	0.9482	3001	5000		beta.i[5457]	0.0016	0.03172	0.0005491	-0.06043	0.001408	0.06385	3001	5000
Zv9_00003163	13.0046	26.4874	11.0191	8.26111	8.76475	7.09949	5.92746	3.65125		pi.1[456]	0.5778	0.1803	0.002703	0.1766	0.6047	0.857	3001	5000		beta.i[456]	0.002023	0.03143	0.0005034	-0.0608	0.002277	0.06371	3001	5000
Zv9_00057425 Zv9_00057423 Zv9_00057426 Zv9_00057424	37.1312	32.6877	9.46002	7.43309	12.5321	9.45063	8.3444	6.93027		pi.1[7963]	0.5282	0.1621	0.002262	0.1768	0.542	0.7935	3001	5000		beta.i[7963]	0.003152	0.03162	0.0005201	-0.05752	0.00334	0.06526	3001	5000
Zv9_00042458 Zv9_00042459	1.15881	1.22762	2.06406	8.25572	12.1715	9.71755	8.94056	14.2757		pi.1[5879]	0.7344	0.2236	0.004413	0.1769	0.7959	0.9906	3001	5000		beta.i[5879]	0.0002854	0.03179	0.0004932	-0.06223	0.0005458	0.06128	3001	5000
Zv9_00007882	34.1929	14.4753	8.8691	5.29429	32.264	8.98342	11.2109	9.96106		pi.1[1105]	0.5301	0.1588	0.002322	0.1771	0.5487	0.7894	3001	5000		beta.i[1105]	0.002949	0.03131	0.0005069	-0.05818	0.002716	0.06444	3001	5000
Zv9_00047026 Zv9_00047023 Zv9_00047025 Zv9_00047024	227.704	80.442	8.51233	6.51466	6.90092	16.1865	18.7418	16.6516		pi.1[6556]	0.4669	0.1354	0.001887	0.1771	0.4775	0.6965	3001	5000		beta.i[6556]	0.003194	0.03138	0.00059	-0.05924	0.003173	0.065	3001	5000
Zv9_00040689	131.989	40.461	38.0535	30.3484	9.61588	5.25082	3.83096	4.20448		pi.1[5644]	0.4853	0.1389	0.002231	0.1772	0.4971	0.7161	3001	5000		beta.i[5644]	0.002953	0.03173	0.0004965	-0.05796	0.002331	0.06615	3001	5000
Zv9_00052501	46.2237	17.0051	15.6978	24.012	13.5037	7.18985	5.19933	6.01966		pi.1[7315]	0.5207	0.1563	0.00197	0.1772	0.5355	0.7805	3001	5000		beta.i[7315]	0.003117	0.03183	0.0005055	-0.05898	0.003153	0.06519	3001	5000
Zv9_00002296	1.10768	1.01848	2.447	7.49329	12.9396	11.4463	11.1799	10.6855		pi.1[332]	0.7372	0.2226	0.005115	0.1773	0.7966	0.9912	3001	5000		beta.i[332]	0.0006524	0.03176	0.0005282	-0.06033	0.0009247	0.06357	3001	5000
Zv9_00047747 Zv9_00047748 Zv9_00047746	149.333	81.1494	23.7495	8.39352	9.32419	7.3847	5.35582	2.83286		pi.1[6658]	0.4688	0.138	0.00209	0.1773	0.4784	0.7067	3001	5000		beta.i[6658]	0.003124	0.0315	0.0005605	-0.05773	0.002844	0.06599	3001	5000
Zv9_00050220	47.2611	18.341	9.54546	188.283	33.3939	3.18692	1	1		pi.1[7004]	0.5031	0.1511	0.002191	0.1773	0.5179	0.7586	3001	5000		beta.i[7004]	0.003247	0.0315	0.0006564	-0.05775	0.003191	0.06543	3001	5000
Zv9_00041209 Zv9_00041208 Zv9_00041207	1.16009	1.08268	1.07197	1.46165	4.69705	15.7575	24.0175	18.1836		pi.1[5714]	0.7342	0.2262	0.005483	0.1774	0.7958	0.993	3001	5000		beta.i[5714]	0.0003698	0.03142	0.0004489	-0.06284	0.0008648	0.06211	3001	5000
Zv9_00037657	52.1891	17.5605	19.167	12.1339	12.388	7.31225	7.81835	10.8918		pi.1[5239]	0.5209	0.1541	0.002494	0.1775	0.5397	0.775	3001	5000		beta.i[5239]	0.003205	0.03181	0.000483	-0.06096	0.002986	0.06423	3001	5000
Zv9_00041766 Zv9_00041763 Zv9_00041765 Zv9_00041764	8.81039	26.4371	14.2614	9.47001	7.27811	5.57289	5.30971	4.93867		pi.1[5794]	0.6163	0.188	0.003192	0.1775	0.6443	0.8963	3001	5000		beta.i[5794]	0.002505	0.03113	0.0004179	-0.05735	0.002327	0.06313	3001	5000
Zv9_00054859	1.02652	1.0382	1.08161	1.15766	1.35517	21.581	56.4875	20.387		pi.1[7617]	0.7206	0.2239	0.005109	0.1775	0.7691	0.9923	3001	5000		beta.i[7617]	-5.942e-05	0.03189	0.0005054	-0.06113	8.834e-07	0.06056	3001	5000
Zv9_00020368	289.053	235.257	47.8963	16.9728	2.32461	1.71464	2.36911	3.77549		pi.1[2837]	0.4556	0.1294	0.002026	0.1778	0.4647	0.6839	3001	5000		beta.i[2837]	0.00398	0.03235	0.0006407	-0.06015	0.003323	0.06761	3001	5000
Zv9_00047101 Zv9_00047100 Zv9_00047099	38.9804	22.1916	22.9153	4.83207	11.2222	10.1933	9.83046	6.81461		pi.1[6566]	0.5247	0.1573	0.002733	0.178	0.5402	0.7836	3001	5000		beta.i[6566]	0.002757	0.0317	0.0005188	-0.0585	0.002948	0.06469	3001	5000
Zv9_00018368 Zv9_00018367 Zv9_00018369	120.882	25.9885	17.0608	13.6386	16.2356	10.0109	9.04957	9.97333		pi.1[2557]	0.4861	0.1421	0.00197	0.1781	0.4982	0.7245	3001	5000		beta.i[2557]	0.002903	0.03192	0.0005523	-0.05923	0.002521	0.0659	3001	5000
Zv9_00001821	1	1.00457	1.12058	1.16111	1.32539	26.9202	30.1616	33.4214		pi.1[253]	0.7328	0.2242	0.005377	0.1784	0.787	0.9922	3001	5000		beta.i[253]	0.0005898	0.03147	0.0005743	-0.061	0.0006303	0.06206	3001	5000
Zv9_00021095 Zv9_00021094	1.06982	1.13221	1.11041	1.46902	6.03737	15.2375	14.5695	29.4552		pi.1[2933]	0.7447	0.2254	0.005488	0.1785	0.8072	0.9927	3001	5000		beta.i[2933]	0.0007535	0.03112	0.0005318	-0.0614	0.0009005	0.0618	3001	5000
Zv9_00054785 Zv9_00054786	70.3857	28.1396	33.5424	10.0566	10.5076	7.67042	6.00818	4.71739		pi.1[7602]	0.4981	0.1471	0.002094	0.1785	0.5131	0.7481	3001	5000		beta.i[7602]	0.002824	0.03155	0.0004233	-0.05804	0.002299	0.06484	3001	5000
Zv9_00047823	9.02843	16.8922	31.9928	33.8644	1	47.4291	43.6474	1		pi.1[6667]	0.5826	0.1823	0.003279	0.1787	0.6022	0.8787	3001	5000		beta.i[6667]	0.002742	0.0317	0.0006245	-0.06013	0.003219	0.06311	3001	5000
Zv9_00037111	105.287	34.9926	30.7099	16.0716	4.16744	1.73592	9.89841	40.8536		pi.1[5158]	0.488	0.144	0.002185	0.1788	0.5031	0.7318	3001	5000		beta.i[5158]	0.004532	0.03133	0.0005917	-0.05641	0.004399	0.06602	3001	5000
Zv9_00045683 Zv9_00045685 Zv9_00045684	124.653	24.4944	12.1709	24.879	27.3124	13.2409	11.6732	1		pi.1[6373]	0.4731	0.1384	0.002263	0.1788	0.4824	0.7145	3001	5000		beta.i[6373]	0.003918	0.03175	0.000508	-0.05797	0.003432	0.06617	3001	5000
Zv9_00017029 Zv9_00017030 Zv9_00017028	163.165	49.6651	16.7372	8.51645	10.8571	20.8103	10.9415	3.48665		pi.1[2367]	0.472	0.1358	0.001982	0.1791	0.4815	0.7041	3001	5000		beta.i[2367]	0.003966	0.0311	0.0004541	-0.05678	0.003631	0.06455	3001	5000
Zv9_00002301	5.28857	11.194	22.2651	22.8031	2.23543	7.1968	6.32305	5.93906		pi.1[333]	0.6504	0.2007	0.003472	0.1792	0.6812	0.944	3001	5000		beta.i[333]	0.001218	0.03124	0.0004358	-0.0594	0.001375	0.06225	3001	5000
Zv9_00020891 Zv9_00020892	155.032	21.985	7.96673	8.7089	10.4993	48.7356	15.6653	12.125		pi.1[2913]	0.4697	0.1368	0.002083	0.1792	0.4809	0.7113	3001	5000		beta.i[2913]	0.002426	0.03097	0.0005084	-0.05687	0.001497	0.06283	3001	5000
Zv9_00028462 Zv9_00028464 Zv9_00028461 Zv9_00028463	62.5512	27.0163	7.44638	5.2787	13.6482	15.4065	17.6853	9.89059		pi.1[3935]	0.5089	0.1523	0.002443	0.1793	0.5225	0.7642	3001	5000		beta.i[3935]	0.003484	0.03157	0.0005005	-0.05789	0.004118	0.06616	3001	5000
Zv9_00046482	32.7506	30.9017	26.0559	13.0696	5.56068	5.2254	5.1753	5.13138		pi.1[6471]	0.5338	0.1619	0.002402	0.1793	0.5514	0.7923	3001	5000		beta.i[6471]	0.002225	0.0314	0.0004602	-0.05734	0.001977	0.06515	3001	5000
Zv9_00052146	72.9308	30.9691	17.151	8.18986	11.2228	12.1846	11.0502	3.87755		pi.1[7264]	0.4978	0.1472	0.002405	0.1793	0.5122	0.7503	3001	5000		beta.i[7264]	0.002245	0.0316	0.0005097	-0.05962	0.002215	0.06514	3001	5000
Zv9_00019725	1.01674	1.03224	1.06445	1.05674	1.73709	49.3285	97.7573	8.85282		pi.1[2738]	0.6978	0.2235	0.00442	0.1794	0.7387	0.9869	3001	5000		beta.i[2738]	0.0003636	0.03159	0.0004153	-0.06123	0.0006088	0.06009	3001	5000
Zv9_00008461	2.87431	4.52625	8.75342	17.6748	10.2822	6.49661	5.13438	3.23425		pi.1[1181]	0.7101	0.2182	0.004939	0.1795	0.7543	0.9886	3001	5000		beta.i[1181]	0.00117	0.03154	0.0004612	-0.06122	0.001154	0.06311	3001	5000
Zv9_00006879 Zv9_00006880	1.66025	1.80157	10.54	26.4399	9.60398	5.63549	5.16347	3.20191		pi.1[964]	0.7118	0.2244	0.004752	0.1796	0.7571	0.9883	3001	5000		beta.i[964]	0.0007879	0.03128	0.000495	-0.06173	0.0009632	0.06047	3001	5000
Zv9_00040519 Zv9_00040518 Zv9_00040517 Zv9_00040520	17.5484	8.85555	6.10229	4.37241	7.88081	10.458	11.1442	32.3358		pi.1[5620]	0.5708	0.1758	0.00311	0.1797	0.5927	0.8484	3001	5000		beta.i[5620]	0.002932	0.0318	0.0005097	-0.05811	0.002365	0.06626	3001	5000
Zv9_00044003	1	1	1.03219	1.13776	1.07832	17.5881	36.8294	41.5267		pi.1[6088]	0.7328	0.2226	0.005199	0.1797	0.7905	0.9904	3001	5000		beta.i[6088]	0.0002614	0.03142	0.0004579	-0.0609	0.0002662	0.06129	3001	5000
Zv9_00024488	65.7787	35.694	46.137	50.6976	1	8.04819	7.31278	13.7728		pi.1[3395]	0.506	0.1471	0.002189	0.1799	0.5187	0.7571	3001	5000		beta.i[3395]	0.003229	0.03213	0.0006037	-0.05969	0.003539	0.06688	3001	5000
Zv9_00045596	1.04429	1.07094	1.01704	1.08071	13.8488	15.0026	19.8749	15.6367		pi.1[6363]	0.7301	0.2211	0.004849	0.18	0.7813	0.9925	3001	5000		beta.i[6363]	-0.0005955	0.03059	0.0005046	-0.05982	-0.0006326	0.05848	3001	5000
Zv9_00006766	1	1	1	1	3.10087	10.3765	13.7495	76.3995		pi.1[946]	0.7498	0.2255	0.005875	0.1801	0.8096	0.9936	3001	5000		beta.i[946]	0.0002577	0.03176	0.0004946	-0.06124	0.0006205	0.06241	3001	5000
Zv9_00001600	14.1647	15.3809	53.7447	25.7178	5.16161	2.84538	2.60587	2.54759		pi.1[218]	0.5832	0.1759	0.002911	0.1802	0.6044	0.8569	3001	5000		beta.i[218]	0.002663	0.03166	0.0005285	-0.05865	0.003048	0.06549	3001	5000
Zv9_00040448 Zv9_00040446 Zv9_00040447	1.31476	1.04342	9.37112	75.9513	28.0134	2.50185	3.12467	5.59163		pi.1[5611]	0.697	0.2219	0.004611	0.1802	0.737	0.9881	3001	5000		beta.i[5611]	0.0004065	0.0316	0.0004586	-0.06264	0.000159	0.06247	3001	5000
Zv9_00025245	9.55373	29.5362	5.15087	3.21611	6.55588	14.301	14.5843	17.314		pi.1[3484]	0.6236	0.1839	0.003319	0.1803	0.652	0.894	3001	5000		beta.i[3484]	0.002309	0.0323	0.000522	-0.06375	0.002867	0.06456	3001	5000
Zv9_00002925 Zv9_00002927 Zv9_00002929 Zv9_00002926 Zv9_00002928	1	1	1	18.0873	24.7802	12.3828	8.23388	6.39087		pi.1[420]	0.719	0.2219	0.004991	0.1804	0.7688	0.9894	3001	5000		beta.i[420]	-0.0003011	0.03214	0.0004825	-0.06351	-0.0001101	0.06213	3001	5000
Zv9_00020887 Zv9_00020886	1	1	1.06551	1.0352	1.67791	70.5371	29.0138	17.7259		pi.1[2911]	0.7034	0.2261	0.004096	0.1804	0.7538	0.9901	3001	5000		beta.i[2911]	0.0003635	0.03216	0.0004698	-0.06236	0.0005074	0.06394	3001	5000
Zv9_00029894	44.4903	19.9943	23.2141	16.51	15.9723	4.27907	4.37141	17.2232		pi.1[4135]	0.5302	0.1539	0.002303	0.1804	0.5475	0.7785	3001	5000		beta.i[4135]	0.003834	0.03175	0.0005743	-0.05818	0.003534	0.06538	3001	5000
Zv9_00033519 Zv9_00033518	8.48209	9.6143	18.382	14.3672	3.8714	3.65191	6.85916	25.085		pi.1[4661]	0.6243	0.1922	0.003101	0.1804	0.6525	0.9058	3001	5000		beta.i[4661]	0.001546	0.03174	0.0005316	-0.05983	0.0007269	0.06527	3001	5000
Zv9_00030150 Zv9_00030149 Zv9_00030147 Zv9_00030151	10.7725	7.00619	7.46518	8.73863	2.84236	11.1923	11.9666	56.638		pi.1[4167]	0.6185	0.1849	0.00355	0.1807	0.6454	0.8886	3001	5000		beta.i[4167]	0.002857	0.03201	0.0005622	-0.06022	0.002708	0.06577	3001	5000
Zv9_00039408	12.372	1	28.3556	1	38.2623	39.8012	35.1054	31.549		pi.1[5477]	0.5774	0.18	0.00345	0.1808	0.5967	0.8605	3001	5000		beta.i[5477]	0.00274	0.03175	0.0005365	-0.05955	0.002981	0.06377	3001	5000
Zv9_00000603 Zv9_00000602	1.19306	1.12412	1.16296	1.32661	8.44356	15.1995	17.6547	19.8829		pi.1[93]	0.7363	0.2243	0.00519	0.1809	0.7944	0.9911	3001	5000		beta.i[93]	0.0007775	0.03148	0.0004799	-0.06133	0.001196	0.06262	3001	5000
Zv9_00053545 Zv9_00053544 Zv9_00053546 Zv9_00053543 Zv9_00053542	1.14324	1.05304	1.45153	1.72376	4.98141	12.9136	16.0277	35.15		pi.1[7454]	0.7508	0.2199	0.005106	0.1809	0.8099	0.9935	3001	5000		beta.i[7454]	3.802e-05	0.03109	0.0004887	-0.06044	0.0004423	0.0605	3001	5000
Zv9_00017910 Zv9_00017909 Zv9_00017911	1.206	1.09857	1.11427	1.17369	1.60197	25.9403	59.5144	21.297		pi.1[2487]	0.736	0.218	0.00488	0.1811	0.7902	0.9903	3001	5000		beta.i[2487]	0.0006141	0.03163	0.0005076	-0.06111	0.0003855	0.06387	3001	5000
Zv9_00050177	2.69919	5.97485	4.51331	5.15212	6.15463	8.32226	8.77298	20.2124		pi.1[6995]	0.7281	0.2169	0.004731	0.1812	0.7821	0.986	3001	5000		beta.i[6995]	0.001692	0.03128	0.0004907	-0.05804	0.001492	0.06226	3001	5000
Zv9_00037747	1.00403	1.01942	1.02174	4.65173	86.8218	16.3286	9.97316	6.14455		pi.1[5252]	0.7044	0.2238	0.004078	0.1814	0.7469	0.9896	3001	5000		beta.i[5252]	0.0001805	0.0315	0.0005073	-0.06166	9.665e-05	0.0635	3001	5000
Zv9_00041394 Zv9_00041395 Zv9_00041397 Zv9_00041396	10.6705	8.64793	11.3174	20.6933	1.61892	6.21142	8.5306	106.791		pi.1[5736]	0.6191	0.1833	0.003149	0.1815	0.65	0.8892	3001	5000		beta.i[5736]	0.002334	0.03111	0.0004862	-0.06014	0.00221	0.06334	3001	5000
Zv9_00046455 Zv9_00046454	8.479	71.9337	38.0082	14.3095	2.15665	1.22189	1.25935	1.34658		pi.1[6466]	0.5951	0.1845	0.002821	0.1816	0.6214	0.883	3001	5000		beta.i[6466]	0.002306	0.0316	0.0004745	-0.06117	0.002854	0.06369	3001	5000
Zv9_00021610	41.5817	22.3792	12.4716	14.5603	9.85051	9.14665	6.84248	9.01656		pi.1[3012]	0.5274	0.1577	0.002509	0.1819	0.5427	0.7844	3001	5000		beta.i[3012]	0.003186	0.03179	0.0004617	-0.05999	0.003619	0.06495	3001	5000
Zv9_00032175	18.2225	8.10011	10.2689	6.22026	3.17391	30.6592	30.3809	15.617		pi.1[4475]	0.5816	0.1681	0.003021	0.1819	0.6023	0.8443	3001	5000		beta.i[4475]	0.002874	0.03155	0.0004988	-0.05878	0.002699	0.06392	3001	5000
Zv9_00018345	1.01601	1	1.41931	2.03715	6.75302	16.4491	21.7546	17.0482		pi.1[2550]	0.7429	0.2201	0.0056	0.1821	0.7981	0.9927	3001	5000		beta.i[2550]	0.0004549	0.03162	0.0005347	-0.06131	0.0002641	0.0624	3001	5000
Zv9_00004381 Zv9_00004378 Zv9_00004376 Zv9_00004377 Zv9_00004372 Zv9_00004379 Zv9_00004373 Zv9_00004380 Zv9_00004375 Zv9_00004374	1	5.76947	3.07644	20.527	19.989	7.14363	6.34119	6.4197		pi.1[627]	0.7249	0.2187	0.004646	0.1824	0.7713	0.9905	3001	5000		beta.i[627]	0.0001528	0.03168	0.0004726	-0.0613	-0.0001548	0.06251	3001	5000
Zv9_00017473 Zv9_00017474	3.90936	5.21639	42.9983	13.3739	2.32855	7.53544	5.32286	15.9853		pi.1[2426]	0.6742	0.2101	0.004107	0.1824	0.7145	0.9645	3001	5000		beta.i[2426]	0.00148	0.0315	0.0005872	-0.05977	0.001428	0.06409	3001	5000
Zv9_00027105	1.45833	2.56755	2.8732	4.59963	12.8131	14.6761	13.4503	7.58922		pi.1[3750]	0.743	0.2193	0.005402	0.1824	0.8011	0.993	3001	5000		beta.i[3750]	0.0005096	0.03154	0.0004549	-0.06314	0.001254	0.06228	3001	5000
Zv9_00035446 Zv9_00035445	84.3724	31.1739	18.1888	9.65848	4.64338	7.61599	9.09841	41.3204		pi.1[4919]	0.5008	0.1464	0.002222	0.1824	0.5137	0.7527	3001	5000		beta.i[4919]	0.003089	0.03209	0.0005206	-0.06007	0.00348	0.06419	3001	5000
Zv9_00031697	65.7774	16.778	8.03787	6.70415	12.0991	16.618	18.1782	20.4942		pi.1[4405]	0.516	0.1515	0.002028	0.1825	0.5303	0.7651	3001	5000		beta.i[4405]	0.002045	0.03138	0.0005557	-0.05956	0.001848	0.06337	3001	5000
Zv9_00002812 Zv9_00002813 Zv9_00002814 Zv9_00002811 Zv9_00002810 Zv9_00002809	16.2233	6.81712	10.8647	5.85883	2.54253	17.318	19.9409	45.8926		pi.1[404]	0.5941	0.1739	0.00301	0.1828	0.6196	0.851	3001	5000		beta.i[404]	0.001774	0.0318	0.0005308	-0.05907	0.002038	0.0654	3001	5000
Zv9_00038639	76.2098	32.4289	12.8828	7.7788	10.1063	13.3848	11.9701	10.7361		pi.1[5368]	0.5047	0.1471	0.002394	0.183	0.5193	0.7476	3001	5000		beta.i[5368]	0.002517	0.03189	0.0005927	-0.06086	0.003177	0.0655	3001	5000
Zv9_00044107 Zv9_00044104 Zv9_00044109 Zv9_00044106 Zv9_00044108 Zv9_00044102 Zv9_00044105 Zv9_00044110 Zv9_00044103	51.8097	31.4053	20.4396	12.3801	6.93102	6.28536	7.22171	10.365		pi.1[6109]	0.5243	0.1515	0.002419	0.183	0.5384	0.7746	3001	5000		beta.i[6109]	0.003022	0.03164	0.0005059	-0.0579	0.003175	0.06486	3001	5000
Zv9_00047448 Zv9_00047447	1.02974	1.02473	1.22125	2.2216	15.3052	13.1817	16.5657	17.6403		pi.1[6619]	0.7363	0.2235	0.005571	0.183	0.7939	0.9944	3001	5000		beta.i[6619]	-0.0004968	0.03159	0.0005343	-0.06303	-0.0002201	0.06154	3001	5000
Zv9_00045537	26.6048	19.5762	27.965	15.7911	7.77001	6.32686	5.12492	4.09051		pi.1[6350]	0.549	0.1642	0.002346	0.1831	0.5629	0.8136	3001	5000		beta.i[6350]	0.001961	0.03163	0.0005127	-0.06063	0.001834	0.0642	3001	5000
Zv9_00010135	1.67884	1.36115	24.5851	43.4527	14.3687	4.89003	3.79314	1.69833		pi.1[1462]	0.7081	0.2224	0.004642	0.1832	0.7532	0.9893	3001	5000		beta.i[1462]	0.0009605	0.03129	0.0005736	-0.06172	0.0009849	0.0629	3001	5000
Zv9_00017687 Zv9_00017688 Zv9_00017689	43.3282	32.2473	34.7549	10.9896	14.197	5.44471	4.23674	6.39841		pi.1[2456]	0.5335	0.1538	0.002471	0.1832	0.5502	0.7857	3001	5000		beta.i[2456]	0.0021	0.03173	0.0005809	-0.06008	0.002171	0.06514	3001	5000
Zv9_00029506 Zv9_00029508 Zv9_00029507 Zv9_00029505	68.5067	39.7722	23.4612	12.3143	13.6702	9.26493	7.22429	2.17393		pi.1[4081]	0.506	0.1461	0.002369	0.1835	0.5209	0.7512	3001	5000		beta.i[4081]	0.003336	0.03153	0.000463	-0.05936	0.003747	0.06365	3001	5000
Zv9_00013918 Zv9_00013919 Zv9_00013920 Zv9_00013916 Zv9_00013917	59.8765	28.2315	37.5101	50.4892	1	17.0005	15.2326	11.3858		pi.1[1933]	0.5109	0.1497	0.002144	0.1836	0.524	0.7592	3001	5000		beta.i[1933]	0.00298	0.03202	0.000578	-0.05917	0.002787	0.06418	3001	5000
Zv9_00022777	1.79817	1.63842	1.6496	3.05608	1.84299	10.2917	16.9105	56.2059		pi.1[3163]	0.7494	0.2244	0.005685	0.1836	0.8111	0.993	3001	5000		beta.i[3163]	0.0004658	0.03172	0.0005153	-0.06165	0.0005372	0.06409	3001	5000
Zv9_00038132 Zv9_00038133	82.7619	39.7219	19.3744	9.79588	7.63017	8.73048	8.5398	7.5537		pi.1[5308]	0.4999	0.1452	0.002377	0.1838	0.5129	0.7476	3001	5000		beta.i[5308]	0.003878	0.03121	0.0005026	-0.0576	0.004017	0.06441	3001	5000
Zv9_00038860 Zv9_00038859	1.56226	1.72673	2.44782	4.02084	10.2164	14.9294	14.0317	8.40155		pi.1[5398]	0.7344	0.2272	0.004572	0.1839	0.794	0.9912	3001	5000		beta.i[5398]	-0.0002121	0.031	0.0005009	-0.06055	-3.622e-05	0.06109	3001	5000
Zv9_00053230	50.358	15.2867	16.1719	9.90661	7.36971	11.9575	11.5591	12.3463		pi.1[7411]	0.5154	0.1533	0.002646	0.1839	0.5299	0.7677	3001	5000		beta.i[7411]	0.002866	0.03118	0.0004621	-0.05606	0.002237	0.06411	3001	5000
Zv9_00044267 Zv9_00044271 Zv9_00044269 Zv9_00044266 Zv9_00044273 Zv9_00044270 Zv9_00044272 Zv9_00044268	32.3296	27.7367	51.6308	73.046	1	25.7707	26.7572	1		pi.1[6140]	0.5214	0.1566	0.00202	0.184	0.536	0.7852	3001	5000		beta.i[6140]	0.003039	0.03185	0.0005066	-0.06029	0.003016	0.06603	3001	5000
Zv9_00053665	117.497	42.6892	20.953	13.9428	10.5528	11.4533	8.15757	3.27152		pi.1[7474]	0.4875	0.14	0.00198	0.184	0.4982	0.7305	3001	5000		beta.i[7474]	0.002043	0.03171	0.0005522	-0.06017	0.001986	0.06414	3001	5000
Zv9_00050247 Zv9_00050248	140.311	80.8992	61.5353	35.4994	5.25257	1	1	1		pi.1[7011]	0.4794	0.136	0.001725	0.1841	0.4889	0.7144	3001	5000		beta.i[7011]	0.002861	0.03123	0.0005508	-0.058	0.002814	0.06463	3001	5000
Zv9_00002105 Zv9_00002104 Zv9_00002106	1.77659	2.5813	3.1975	3.28018	5.05813	16.9405	12.9895	21.9034		pi.1[294]	0.7577	0.2171	0.005148	0.1846	0.8161	0.9934	3001	5000		beta.i[294]	0.0004174	0.032	0.0004708	-0.06242	0.0007789	0.06141	3001	5000
Zv9_00024143 Zv9_00024141 Zv9_00024145 Zv9_00024144 Zv9_00024146 Zv9_00024142	44.5096	8.4518	8.16733	9.14932	2.82582	46.2546	52.088	15.405		pi.1[3353]	0.5207	0.1539	0.002344	0.1848	0.5348	0.7758	3001	5000		beta.i[3353]	0.002173	0.03096	0.0005254	-0.05779	0.001496	0.06445	3001	5000
Zv9_00041092 Zv9_00041085 Zv9_00041089 Zv9_00041083 Zv9_00041086 Zv9_00041082 Zv9_00041084 Zv9_00041081 Zv9_00041088 Zv9_00041087 Zv9_00041080 Zv9_00041090	43.1894	20.9625	26.3047	13.8894	8.65682	6.30595	6.70427	8.01439		pi.1[5696]	0.5293	0.1573	0.002235	0.1848	0.5456	0.7858	3001	5000		beta.i[5696]	0.002456	0.03244	0.0005295	-0.05989	0.001641	0.06582	3001	5000
Zv9_00045398	1.39421	1.18034	9.94943	15.971	6.15529	5.33686	6.63985	19.4046		pi.1[6333]	0.7343	0.2238	0.005199	0.1848	0.7894	0.9929	3001	5000		beta.i[6333]	0.0009394	0.03202	0.0005308	-0.06111	0.0005174	0.06426	3001	5000
Zv9_00007804 Zv9_00007802 Zv9_00007803 Zv9_00007805	69.0778	65.9912	63.5334	30.0712	2.02591	3.42318	1	1		pi.1[1092]	0.4986	0.1462	0.002056	0.185	0.5088	0.748	3001	5000		beta.i[1092]	0.002657	0.03133	0.0004997	-0.06107	0.002618	0.06242	3001	5000
Zv9_00011452 Zv9_00011450 Zv9_00011451	143.334	53.0821	15.9097	3.30203	9.87947	23.836	17.5525	14.0116		pi.1[1646]	0.4866	0.136	0.002118	0.185	0.4986	0.7256	3001	5000		beta.i[1646]	0.003476	0.03131	0.0005103	-0.05797	0.003928	0.06736	3001	5000
Zv9_00047509	3.42111	1.17524	83.2843	82.3692	5.64174	5.57456	4.33357	1.97052		pi.1[6629]	0.6484	0.2151	0.004146	0.1853	0.6801	0.9688	3001	5000		beta.i[6629]	0.000137	0.03174	0.0005116	-0.063	0.0005262	0.06315	3001	5000
Zv9_00001888 Zv9_00001889	1	1.10407	1.06093	1.05346	1.78525	10.2128	21.8398	71.0365		pi.1[262]	0.7583	0.2199	0.005444	0.1855	0.8227	0.9918	3001	5000		beta.i[262]	0.0004505	0.03133	0.0004445	-0.06079	0.0005807	0.06083	3001	5000
Zv9_00004076 Zv9_00004078 Zv9_00004079 Zv9_00004077	5.15268	4.61755	3.2382	3.28532	3.70132	9.82322	13.4252	69.9268		pi.1[577]	0.6901	0.2048	0.004579	0.1856	0.7306	0.9607	3001	5000		beta.i[577]	0.001598	0.03149	0.0004669	-0.05882	0.001642	0.0658	3001	5000
Zv9_00014317	1.61069	2.13356	2.18591	2.96613	5.77186	15.4813	17.6807	16.7719		pi.1[1986]	0.7489	0.2192	0.005011	0.1858	0.8072	0.9924	3001	5000		beta.i[1986]	0.0003624	0.03151	0.0004676	-0.06129	0.0009636	0.06182	3001	5000
Zv9_00022832	65.1105	20.8195	28.0546	19.7501	9.19404	6.62248	6.49678	8.01808		pi.1[3169]	0.5098	0.1511	0.002289	0.1858	0.5222	0.7674	3001	5000		beta.i[3169]	0.002816	0.03185	0.0005002	-0.06159	0.003564	0.06409	3001	5000
Zv9_00027484 Zv9_00027483 Zv9_00027481 Zv9_00027482	34.3797	30.5498	13.3477	4.51098	11.7098	13.1577	12.0872	8.29109		pi.1[3794]	0.5422	0.1593	0.002307	0.1858	0.5602	0.8064	3001	5000		beta.i[3794]	0.002718	0.03254	0.0005434	-0.06019	0.002618	0.06581	3001	5000
Zv9_00029383	1.52966	1.11963	3.78829	11.2311	17.6011	11.7163	6.40946	7.60845		pi.1[4061]	0.7274	0.226	0.004709	0.186	0.783	0.9915	3001	5000		beta.i[4061]	0.0008442	0.03118	0.0004893	-0.06021	0.0009847	0.06348	3001	5000
Zv9_00031734 Zv9_00031735	8.74787	20.681	20.0635	13.6054	6.96822	4.48675	2.73202	1.79729		pi.1[4413]	0.609	0.1877	0.003203	0.186	0.6348	0.8984	3001	5000		beta.i[4413]	0.002863	0.03224	0.0003822	-0.06047	0.003054	0.06645	3001	5000
Zv9_00044526 Zv9_00044525	264.784	58.7003	39.445	27.0434	16.0251	4.81622	4.52781	5.60501		pi.1[6185]	0.4671	0.1283	0.001795	0.1862	0.4761	0.6897	3001	5000		beta.i[6185]	0.003241	0.03151	0.0006091	-0.05988	0.00329	0.06427	3001	5000
Zv9_00022897	1.04799	1.04605	1.03691	1.17148	6.34086	27.3185	25.7208	12.894		pi.1[3181]	0.7347	0.2231	0.004468	0.1863	0.7941	0.994	3001	5000		beta.i[3181]	0.0004047	0.03197	0.0004754	-0.06236	0.0003719	0.06334	3001	5000
Zv9_00028844 Zv9_00028846 Zv9_00028847 Zv9_00028845 Zv9_00028843 Zv9_00028848	158.992	74.8363	29.2192	16.0029	1	17.2972	14.9713	11.9868		pi.1[3991]	0.4736	0.1342	0.002121	0.1863	0.4852	0.7021	3001	5000		beta.i[3991]	0.002892	0.03136	0.0005301	-0.05957	0.00299	0.06568	3001	5000
Zv9_00030349 Zv9_00030347 Zv9_00030351 Zv9_00030346 Zv9_00030345 Zv9_00030348 Zv9_00030350	22.4317	43.865	11.4643	11.5722	14.4416	7.03278	5.00725	1.72527		pi.1[4195]	0.5507	0.1662	0.002802	0.1863	0.5691	0.8154	3001	5000		beta.i[4195]	0.001491	0.03196	0.0005491	-0.0616	0.00196	0.06527	3001	5000
Zv9_00019234	97.3622	90.4731	74.3777	272.315	1	1	1	1		pi.1[2671]	0.4851	0.1379	0.002294	0.1865	0.495	0.7243	3001	5000		beta.i[2671]	0.003402	0.03169	0.0007201	-0.05994	0.003314	0.06569	3001	5000
Zv9_00036256 Zv9_00036253 Zv9_00036254 Zv9_00036246 Zv9_00036245 Zv9_00036242 Zv9_00036244	364.084	253.034	60.6267	8.36412	2.08246	6.58517	4.42426	3.5448		pi.1[5030]	0.452	0.1273	0.00172	0.1865	0.4607	0.6757	3001	5000		beta.i[5030]	0.003442	0.0314	0.0006294	-0.05757	0.003412	0.06336	3001	5000
Zv9_00017396	2.45747	1.00525	45.6091	48.775	5.1946	5.30184	4.01105	12.5894		pi.1[2414]	0.7073	0.2178	0.004446	0.1867	0.7503	0.9894	3001	5000		beta.i[2414]	0.001254	0.03174	0.0005008	-0.06025	0.001408	0.06133	3001	5000
Zv9_00040218	1.84279	1.14499	20.7065	30.0956	38.8989	5.8367	1.13857	1.07633		pi.1[5577]	0.6962	0.2178	0.004813	0.1867	0.738	0.9863	3001	5000		beta.i[5577]	0.0009163	0.03155	0.0004754	-0.06173	0.0011	0.0615	3001	5000
Zv9_00005084	86.6069	33.9662	38.2473	20.9111	9.55824	6.10459	7.13496	4.77161		pi.1[731]	0.508	0.1391	0.001984	0.1868	0.5242	0.7444	3001	5000		beta.i[731]	0.002527	0.03153	0.0005187	-0.05766	0.001887	0.06568	3001	5000
Zv9_00021819 Zv9_00021820 Zv9_00021818	1	1.01705	1.0138	1.08587	1.39514	44.3935	37.2252	29.3183		pi.1[3031]	0.7331	0.2161	0.004909	0.187	0.7842	0.9911	3001	5000		beta.i[3031]	0.001144	0.03175	0.0005378	-0.0602	0.001083	0.06347	3001	5000
Zv9_00031398 Zv9_00031396 Zv9_00031395 Zv9_00031397	6.74603	21.6645	27.9691	21.1446	2.23096	4.88243	4.75699	5.66488		pi.1[4352]	0.6332	0.1911	0.003256	0.1879	0.6602	0.9142	3001	5000		beta.i[4352]	0.001956	0.03167	0.0004456	-0.06014	0.001202	0.06518	3001	5000
Zv9_00048489 Zv9_00048490	1.40094	1.29322	1.27948	4.0293	6.97524	12.6816	18.6262	15.2726		pi.1[6775]	0.7481	0.2208	0.00489	0.188	0.8083	0.9941	3001	5000		beta.i[6775]	0.000933	0.03104	0.0004566	-0.05817	0.0008733	0.06335	3001	5000
Zv9_00036541 Zv9_00036540	1.04295	1.02542	2.40193	11.6947	18.8301	8.16897	9.76535	6.67459		pi.1[5068]	0.7219	0.2243	0.004887	0.1881	0.7743	0.9926	3001	5000		beta.i[5068]	0.0007334	0.03163	0.0004437	-0.06183	0.000895	0.06222	3001	5000
Zv9_00047217	1	1	1.08314	1.0367	1.29747	25.9968	65.9375	17.9149		pi.1[6585]	0.71	0.2225	0.005224	0.1881	0.7529	0.9889	3001	5000		beta.i[6585]	0.0004511	0.03141	0.0005554	-0.06016	0.0003413	0.06262	3001	5000
Zv9_00043573	7.87597	35.7598	16.9077	7.01788	4.91012	3.61544	6.41455	10.3071		pi.1[6023]	0.6273	0.1916	0.003277	0.1882	0.6581	0.9066	3001	5000		beta.i[6023]	0.002416	0.03162	0.0004906	-0.05873	0.001716	0.06618	3001	5000
Zv9_00014414 Zv9_00014413 Zv9_00014419 Zv9_00014421 Zv9_00014416 Zv9_00014417 Zv9_00014415 Zv9_00014418 Zv9_00014420	286.25	58.859	32.8719	16.8852	2.36219	21.3693	10.1265	14.227		pi.1[2005]	0.4551	0.1274	0.001898	0.1883	0.4637	0.6748	3001	5000		beta.i[2005]	0.00371	0.03218	0.000658	-0.06034	0.004177	0.06683	3001	5000
Zv9_00036572 Zv9_00036573 Zv9_00036571	13.9695	33.4586	7.36776	11.4592	11.0041	7.61033	6.75066	5.89939		pi.1[5072]	0.5898	0.1745	0.002937	0.1883	0.6107	0.862	3001	5000		beta.i[5072]	0.002777	0.03132	0.0005148	-0.05832	0.002897	0.06369	3001	5000
Zv9_00013151 Zv9_00013152	1	1	1.37774	1.03205	3.80954	13.38	23.7682	25.4557		pi.1[1842]	0.7293	0.2258	0.005753	0.1885	0.7864	0.9919	3001	5000		beta.i[1842]	-0.0002755	0.03115	0.0005175	-0.06084	-0.0003377	0.06113	3001	5000
Zv9_00036249 Zv9_00036247 Zv9_00036248	6.80998	7.90228	13.3999	33.6163	13.3384	3.91469	3.66901	3.50828		pi.1[5031]	0.641	0.1916	0.003219	0.1887	0.6716	0.9233	3001	5000		beta.i[5031]	0.0004028	0.03133	0.0004696	-0.06017	-3.781e-05	0.06309	3001	5000
Zv9_00001181 Zv9_00001183 Zv9_00001182 Zv9_00001184	383.157	80.2096	126.089	11.6191	9.40267	7.43448	1	5.07308		pi.1[171]	0.4411	0.1227	0.001782	0.189	0.4478	0.6591	3001	5000		beta.i[171]	0.003515	0.0315	0.0006358	-0.05867	0.003811	0.06483	3001	5000
Zv9_00006838 Zv9_00006837	1.24882	1	8.18225	16.3759	15.4574	6.40494	4.47499	14.3127		pi.1[956]	0.7391	0.2202	0.005988	0.189	0.7922	0.9947	3001	5000		beta.i[956]	0.0001596	0.03184	0.0004866	-0.06084	-0.0004544	0.06383	3001	5000
Zv9_00027670 Zv9_00027669 Zv9_00027671	11.9228	34.8442	14.5021	11.7087	7.82953	6.61821	4.62518	2.90454		pi.1[3817]	0.593	0.1792	0.002694	0.189	0.6194	0.8725	3001	5000		beta.i[3817]	0.003016	0.03177	0.0004238	-0.06031	0.003132	0.06548	3001	5000
Zv9_00003383 Zv9_00003377 Zv9_00003379 Zv9_00003380 Zv9_00003376 Zv9_00003378 Zv9_00003382	1	1	172.632	138.004	1	1	62.7253	34.6009		pi.1[489]	0.6468	0.2129	0.003879	0.1891	0.6641	0.9824	3001	5000		beta.i[489]	0.0006932	0.03138	0.0005499	-0.06171	2.393e-05	0.06236	3001	5000
Zv9_00011501 Zv9_00011502	1.00569	1	1.03944	1.27296	2.99083	26.831	31.7117	19.2876		pi.1[1655]	0.735	0.2183	0.004308	0.1891	0.7849	0.9913	3001	5000		beta.i[1655]	-5.644e-05	0.03202	0.0004621	-0.06294	-0.0003316	0.06435	3001	5000
Zv9_00016822	1.63069	1.82809	2.19268	3.89022	10.0272	19.1853	14.9453	9.96061		pi.1[2337]	0.738	0.2206	0.00533	0.1895	0.795	0.9924	3001	5000		beta.i[2337]	0.0004661	0.03209	0.0004873	-0.06202	0.001012	0.06289	3001	5000
Zv9_00028423 Zv9_00028428 Zv9_00028424	14.1392	34.9506	15.8415	4.18784	6.08187	7.72023	8.66784	12.1072		pi.1[3930]	0.5887	0.1736	0.003074	0.1898	0.6098	0.8573	3001	5000		beta.i[3930]	0.001997	0.0314	0.0004625	-0.05797	0.002236	0.06444	3001	5000
Zv9_00039789 Zv9_00039786 Zv9_00039787 Zv9_00039788 Zv9_00039785	212.532	42.0282	28.7501	11.8221	7.14933	5.03824	4.75738	398.349		pi.1[5523]	0.4792	0.1338	0.001985	0.1898	0.4887	0.7077	3001	5000		beta.i[5523]	0.003867	0.03148	0.0006349	-0.05956	0.004695	0.06373	3001	5000
Zv9_00049550	5.90798	3.84915	14.4018	24.5502	9.42466	6.16627	6.26065	5.97576		pi.1[6918]	0.6533	0.2005	0.003745	0.1899	0.6857	0.9408	3001	5000		beta.i[6918]	0.002138	0.03155	0.0004685	-0.05981	0.001773	0.06513	3001	5000
Zv9_00052408	33.1694	24.1082	23.4452	21.6138	8.26734	5.47953	4.86081	3.74661		pi.1[7301]	0.5419	0.1568	0.002742	0.19	0.5586	0.7994	3001	5000		beta.i[7301]	0.002413	0.03138	0.0005052	-0.05917	0.002429	0.06353	3001	5000
Zv9_00055459 Zv9_00055461 Zv9_00055458 Zv9_00055460	38.0836	24.7957	22.6425	12.7462	6.8056	10.5747	9.23353	5.36536		pi.1[7697]	0.5359	0.1605	0.002572	0.1902	0.5539	0.7945	3001	5000		beta.i[7697]	0.002189	0.03115	0.0004472	-0.05964	0.002063	0.06396	3001	5000
Zv9_00003198	77.7148	295.647	50.719	10.2433	1.7091	1.05338	1.02386	1		pi.1[463]	0.4977	0.1403	0.00213	0.1903	0.5077	0.7355	3001	5000		beta.i[463]	0.002426	0.03115	0.0006451	-0.05821	0.001896	0.06356	3001	5000
Zv9_00001369	1591.3	425.479	70.3637	36.8068	2.23513	1.12899	1.10386	1.13648		pi.1[188]	0.4193	0.1072	0.001376	0.1904	0.426	0.6108	3001	5000		beta.i[188]	0.003906	0.03157	0.001093	-0.05929	0.003792	0.06663	3001	5000
Zv9_00031577 Zv9_00031578	5.17904	25.4975	24.756	9.82351	5.64896	4.42932	4.37676	3.54382		pi.1[4386]	0.654	0.1984	0.003607	0.1904	0.6863	0.9426	3001	5000		beta.i[4386]	0.00138	0.03132	0.0004984	-0.05997	0.001214	0.06228	3001	5000
Zv9_00033150	1.33276	1.00972	10.0005	12.6577	39.3908	16.5361	5.90589	1.50974		pi.1[4601]	0.7172	0.2175	0.004484	0.1906	0.7644	0.9893	3001	5000		beta.i[4601]	4.15e-05	0.03206	0.000451	-0.06112	0.0002226	0.06401	3001	5000
Zv9_00022976	12.7268	52.6135	39.2369	19.0925	3.26124	1.06035	1	1		pi.1[3196]	0.5772	0.1744	0.003261	0.1907	0.5988	0.8579	3001	5000		beta.i[3196]	0.001574	0.03152	0.0005387	-0.06024	0.00141	0.0634	3001	5000
Zv9_00058072	485.755	102.165	90.1826	87.5517	2.60068	1.50619	1.37848	1.57485		pi.1[8079]	0.4419	0.1194	0.001645	0.1908	0.4499	0.6578	3001	5000		beta.i[8079]	0.003256	0.03195	0.0007671	-0.0602	0.00293	0.06463	3001	5000
Zv9_00003343 Zv9_00003341 Zv9_00003342	21.9938	15.0916	25.1232	31.3292	1.69367	3.31782	9.33622	30.0679		pi.1[485]	0.5626	0.165	0.003069	0.1909	0.5816	0.8251	3001	5000		beta.i[485]	0.00269	0.03155	0.0005165	-0.05853	0.002806	0.06525	3001	5000
Zv9_00045841	1.01855	1.09838	1.05103	1.02685	1.12377	14.3156	28.5201	77.5316		pi.1[6395]	0.7629	0.2153	0.005278	0.191	0.8239	0.9948	3001	5000		beta.i[6395]	0.0006491	0.03174	0.0005371	-0.06079	0.0005136	0.06367	3001	5000
Zv9_00054119 Zv9_00054120	52.6122	18.3647	30.2172	33.7227	3.20191	11.1764	8.88555	8.64725		pi.1[7528]	0.516	0.1498	0.002277	0.191	0.5282	0.7697	3001	5000		beta.i[7528]	0.003301	0.03175	0.0005261	-0.05819	0.003416	0.06618	3001	5000
Zv9_00024236 Zv9_00024237	5.31749	13.179	20.5958	14.7156	8.87532	3.83187	2.7334	5.22147		pi.1[3366]	0.6614	0.1992	0.003478	0.1911	0.6966	0.9425	3001	5000		beta.i[3366]	0.002516	0.03137	0.0004427	-0.05756	0.002555	0.06376	3001	5000
Zv9_00027676	1.01782	1.027	1.04313	1.01031	1.1264	13.1702	30.8185	59.2182		pi.1[3819]	0.7534	0.2173	0.005112	0.1911	0.8081	0.9944	3001	5000		beta.i[3819]	0.0004776	0.03114	0.0004268	-0.06033	0.000258	0.06199	3001	5000
Zv9_00008721 Zv9_00008720	60.0509	17.0028	17.3571	21.8582	11.3379	11.1151	10.5007	5.58588		pi.1[1217]	0.5154	0.148	0.002315	0.1912	0.5284	0.7587	3001	5000		beta.i[1217]	0.002797	0.03115	0.0004959	-0.05739	0.003029	0.0645	3001	5000
Zv9_00033495 Zv9_00033497 Zv9_00033494 Zv9_00033496 Zv9_00033498	60.8076	31.9433	13.5752	11.3607	10.9337	11.1526	9.97367	7.40043		pi.1[4656]	0.5146	0.1488	0.002461	0.1912	0.5288	0.7587	3001	5000		beta.i[4656]	0.004053	0.03119	0.000523	-0.05805	0.004187	0.06435	3001	5000
Zv9_00035063	157.115	57.4532	17.7377	3.68118	13.8108	17.0773	9.90709	11.0768		pi.1[4868]	0.4731	0.133	0.001929	0.1912	0.4836	0.7033	3001	5000		beta.i[4868]	0.003534	0.03181	0.0004746	-0.05873	0.003217	0.06565	3001	5000
Zv9_00052390	1	1	1	1	1.70602	64.4415	45.5684	17.6332		pi.1[7298]	0.7205	0.216	0.004471	0.1914	0.7702	0.9905	3001	5000		beta.i[7298]	-0.0001797	0.03198	0.0005437	-0.06255	-0.000395	0.06203	3001	5000
Zv9_00011374 Zv9_00011373 Zv9_00011372	1.46222	2.70817	1.49759	1.37097	13.4218	24.6752	18.2601	10.0673		pi.1[1639]	0.7343	0.2156	0.004631	0.1915	0.7871	0.9897	3001	5000		beta.i[1639]	0.0009374	0.03146	0.0004986	-0.06214	0.001217	0.06078	3001	5000
Zv9_00029342 Zv9_00029343	62.0908	37.2186	20.6868	18.9062	11.8038	5.80069	4.60689	6.13224		pi.1[4055]	0.5174	0.1453	0.002017	0.1919	0.5295	0.7608	3001	5000		beta.i[4055]	0.003056	0.03173	0.0005196	-0.05904	0.002804	0.06476	3001	5000
Zv9_00008802 Zv9_00008803	1.83801	1.44746	25.0868	34.8063	12.6262	5.44046	4.81715	2.55925		pi.1[1225]	0.7082	0.2165	0.004204	0.1921	0.7511	0.9894	3001	5000		beta.i[1225]	0.001408	0.03169	0.0004372	-0.05913	0.001823	0.06409	3001	5000
Zv9_00048896	52.6407	17.0804	13.6058	10.2178	13.2954	12.9564	12.1545	10.6467		pi.1[6835]	0.5249	0.1522	0.002339	0.1923	0.5407	0.7712	3001	5000		beta.i[6835]	0.003359	0.03175	0.0005756	-0.0603	0.004039	0.06641	3001	5000
Zv9_00052392 Zv9_00052394 Zv9_00052393 Zv9_00052395	150.984	74.0631	64.837	36.35	4.51547	3.01749	2.80774	3.12728		pi.1[7299]	0.4819	0.1343	0.002101	0.1924	0.4931	0.7148	3001	5000		beta.i[7299]	0.002433	0.03191	0.0005624	-0.05962	0.00245	0.0661	3001	5000
Zv9_00050621 Zv9_00050622 Zv9_00050620	53.8438	33.0213	9.94008	9.55302	11.1085	9.49271	10.9747	18.0906		pi.1[7063]	0.5304	0.1512	0.002232	0.1926	0.5443	0.7815	3001	5000		beta.i[7063]	0.003016	0.03129	0.0005001	-0.05826	0.003534	0.06342	3001	5000
Zv9_00004182 Zv9_00004185 Zv9_00004183 Zv9_00004184	74.4852	24.9441	18.5572	22.9471	15.3455	12.3717	8.0008	3.06361		pi.1[596]	0.5079	0.1438	0.002091	0.1927	0.5209	0.7503	3001	5000		beta.i[596]	0.00275	0.03165	0.0004853	-0.05981	0.002908	0.06464	3001	5000
Zv9_00021427	1	1.02028	1.58828	23.2586	57.0041	13.5937	5.7417	1.53472		pi.1[2988]	0.7013	0.2199	0.0044	0.1927	0.7463	0.9892	3001	5000		beta.i[2988]	-0.000269	0.03109	0.0004797	-0.06128	-0.0002372	0.05979	3001	5000
Zv9_00028842 Zv9_00028841 Zv9_00028840	3.984	2.66946	2.55782	3.20616	13.5997	18.4674	13.4166	10.7368		pi.1[3990]	0.6973	0.2095	0.003776	0.1928	0.7453	0.9752	3001	5000		beta.i[3990]	0.0007575	0.03185	0.0005175	-0.06221	0.0005145	0.06225	3001	5000
Zv9_00005161 Zv9_00005165 Zv9_00005164 Zv9_00005166 Zv9_00005163 Zv9_00005162	60.9219	43.2534	27.7567	18.8939	6.22254	5.01017	5.65391	5.29607		pi.1[742]	0.5147	0.1505	0.002138	0.1929	0.528	0.7668	3001	5000		beta.i[742]	0.002824	0.03145	0.0004781	-0.05703	0.002213	0.06508	3001	5000
Zv9_00037919	1	1.026	1	1.00409	12.0366	23.4982	25.989	11.2504		pi.1[5278]	0.725	0.2199	0.004987	0.1929	0.7782	0.99	3001	5000		beta.i[5278]	0.0008365	0.03153	0.0004521	-0.06053	0.001216	0.06331	3001	5000
Zv9_00003603 Zv9_00003602 Zv9_00003604	155.768	85.7958	32.03	11.3026	12.7447	7.56258	5.38721	1.99015		pi.1[518]	0.4829	0.1338	0.002207	0.1931	0.4946	0.7135	3001	5000		beta.i[518]	0.002984	0.03208	0.0005385	-0.05958	0.003025	0.06597	3001	5000
Zv9_00004118 Zv9_00004120 Zv9_00004119	37.8793	32.1521	15.6419	9.66005	10.5779	7.25174	8.17911	7.08363		pi.1[583]	0.5346	0.1572	0.002238	0.1932	0.552	0.7913	3001	5000		beta.i[583]	0.003185	0.03145	0.0004514	-0.05773	0.003622	0.06513	3001	5000
Zv9_00003311 Zv9_00003310 Zv9_00003309 Zv9_00003313 Zv9_00003312	36.9607	31.9743	8.68529	9.36815	10.2855	9.23024	12.3294	10.0695		pi.1[479]	0.5389	0.1578	0.002664	0.1934	0.5571	0.7914	3001	5000		beta.i[479]	0.001982	0.0312	0.0004853	-0.05871	0.001677	0.06314	3001	5000
Zv9_00033806 Zv9_00033807 Zv9_00033808 Zv9_00033809	48.175	23.8848	20.6429	15.2152	9.84247	7.98592	8.80193	6.27784		pi.1[4707]	0.5288	0.1509	0.002189	0.1934	0.5429	0.7762	3001	5000		beta.i[4707]	0.002571	0.03201	0.000536	-0.06106	0.002595	0.06513	3001	5000
Zv9_00051203 Zv9_00051204 Zv9_00051205	232.33	122.135	118.034	21.3038	2.50557	1.52703	1.78804	1.22536		pi.1[7146]	0.4621	0.1285	0.001754	0.1935	0.4691	0.6888	3001	5000		beta.i[7146]	0.003786	0.03108	0.0006659	-0.05679	0.003525	0.06501	3001	5000
Zv9_00031582 Zv9_00031586 Zv9_00031585	15.1198	30.8277	26.4521	7.92285	4.65202	5.58291	5.13964	4.72983		pi.1[4387]	0.5786	0.1751	0.002588	0.1936	0.5988	0.8561	3001	5000		beta.i[4387]	0.002126	0.03154	0.0004532	-0.05972	0.002033	0.06293	3001	5000
Zv9_00030885 Zv9_00030887 Zv9_00030884 Zv9_00030886	4.33389	6.15594	2.6823	1.50432	12.7421	15.2807	18.0842	16.5405		pi.1[4272]	0.683	0.2042	0.003955	0.1937	0.7209	0.9625	3001	5000		beta.i[4272]	0.001983	0.03227	0.0004755	-0.06035	0.001994	0.06647	3001	5000
Zv9_00052245	1	1	1	1.00818	26.5725	18.2875	18.4462	11.4693		pi.1[7281]	0.7106	0.2222	0.005384	0.1937	0.7554	0.9884	3001	5000		beta.i[7281]	0.00101	0.03179	0.0004378	-0.06087	0.0009681	0.06303	3001	5000
Zv9_00003037 Zv9_00003038 Zv9_00003036	379.419	154.144	38.2229	12.2201	4.82817	4.97224	6.74285	8.9473		pi.1[435]	0.4586	0.1221	0.002193	0.1938	0.4666	0.6714	3001	5000		beta.i[435]	0.002365	0.03207	0.0005687	-0.06095	0.002336	0.06498	3001	5000
Zv9_00053516 Zv9_00053517	1.78759	3.03323	4.13627	5.59397	15.5013	11.5607	12.1582	5.83893		pi.1[7449]	0.7356	0.2177	0.004533	0.1939	0.7891	0.992	3001	5000		beta.i[7449]	0.0001243	0.03148	0.0005146	-0.0608	0.0001568	0.06284	3001	5000
Zv9_00042851	7.94962	5.29928	7.64545	17.9731	30.4286	6.28208	6.14397	8.06615		pi.1[5925]	0.6342	0.1856	0.003105	0.1941	0.6625	0.9023	3001	5000		beta.i[5925]	0.002824	0.03191	0.0004554	-0.05782	0.002076	0.06569	3001	5000
Zv9_00025329	1	1.02435	1	1.01978	3.03609	23.9015	32.1431	25.0136		pi.1[3494]	0.7401	0.2185	0.004849	0.1943	0.799	0.9915	3001	5000		beta.i[3494]	0.001348	0.0315	0.0005117	-0.05938	0.0004987	0.06293	3001	5000
Zv9_00049274 Zv9_00049275 Zv9_00049272 Zv9_00049273	1.54867	1.86306	3.47006	1.51426	13.7002	16.7003	15.9881	14.3601		pi.1[6881]	0.7397	0.2197	0.004728	0.1945	0.7915	0.9915	3001	5000		beta.i[6881]	0.0009866	0.031	0.0004699	-0.05946	0.0006377	0.0611	3001	5000
Zv9_00002266 Zv9_00002267	42.9317	20.1951	13.2522	18.9359	13.3417	7.64943	5.71752	7.95009		pi.1[326]	0.5316	0.1522	0.002066	0.1947	0.5496	0.7784	3001	5000		beta.i[326]	0.002651	0.03171	0.0005269	-0.0595	0.00248	0.06652	3001	5000
Zv9_00049912 Zv9_00049906 Zv9_00049908 Zv9_00049907 Zv9_00049911 Zv9_00049910 Zv9_00049909	1	6.18372	1	10.6599	20.3022	14.6217	11.5227	10.7557		pi.1[6954]	0.7311	0.2213	0.005019	0.1947	0.7829	0.9928	3001	5000		beta.i[6954]	-0.0001881	0.03193	0.0004725	-0.0616	-0.0001634	0.06317	3001	5000
Zv9_00027849	1	1	1.05865	6.08946	11.7398	28.3809	30.7406	4.69041		pi.1[3845]	0.7254	0.2184	0.003829	0.1948	0.7772	0.9915	3001	5000		beta.i[3845]	0.0006868	0.03152	0.0004468	-0.06034	0.0005265	0.06353	3001	5000
Zv9_00049008	1	1.01456	1.10449	1.21553	1.61443	30.3336	23.8112	39.4524		pi.1[6847]	0.7426	0.2144	0.004677	0.1948	0.7978	0.99	3001	5000		beta.i[6847]	0.0002371	0.03121	0.0004818	-0.06138	-0.0001563	0.06072	3001	5000
Zv9_00006955	1.25598	1.16578	6.05528	13.1923	19.5536	10.1582	6.41803	6.30114		pi.1[973]	0.7359	0.22	0.004983	0.1949	0.789	0.9895	3001	5000		beta.i[973]	0.0005406	0.03135	0.000519	-0.06208	0.00101	0.06159	3001	5000
Zv9_00047980 Zv9_00047981	50.5265	26.2696	14.0379	9.47305	15.7276	14.773	13.9022	3.97354		pi.1[6692]	0.5232	0.1493	0.002166	0.1951	0.5374	0.7735	3001	5000		beta.i[6692]	0.003176	0.03203	0.0004745	-0.06108	0.003294	0.06391	3001	5000
Zv9_00002191	3.72315	1.03555	80.2469	130.322	11.7367	2.72205	1.90508	3.09825		pi.1[314]	0.6603	0.2068	0.003717	0.1953	0.6884	0.9688	3001	5000		beta.i[314]	0.001021	0.03156	0.0004761	-0.06135	0.001534	0.06159	3001	5000
Zv9_00055674 Zv9_00055673	51.2294	49.2482	21.1626	4.82477	15.289	9.85885	10.6218	5.58722		pi.1[7724]	0.5249	0.1513	0.002181	0.1954	0.5411	0.7817	3001	5000		beta.i[7724]	0.003714	0.03135	0.0005634	-0.05785	0.00364	0.06442	3001	5000
Zv9_00057565 Zv9_00057564	1.57306	1.68017	1.92122	3.08868	7.51587	12.9907	13.9413	22.371		pi.1[8001]	0.7524	0.2178	0.005054	0.1954	0.8124	0.9946	3001	5000		beta.i[8001]	0.0003949	0.03135	0.0004685	-0.06063	-0.0001483	0.06155	3001	5000
Zv9_00017722	1.26742	1.18359	1.19256	3.57325	15.2496	7.15233	10.4894	55.4016		pi.1[2459]	0.7522	0.2193	0.005519	0.1957	0.8101	0.9942	3001	5000		beta.i[2459]	-0.0003392	0.03112	0.0005009	-0.06185	-0.0004485	0.0613	3001	5000
Zv9_00020602 Zv9_00020603 Zv9_00020601 Zv9_00020604	7.40128	4.42032	3.7647	7.1924	14.1822	7.80545	16.6719	25.1497		pi.1[2877]	0.6564	0.1922	0.003665	0.1957	0.6923	0.9259	3001	5000		beta.i[2877]	0.001467	0.03205	0.0004302	-0.06099	0.001301	0.06547	3001	5000
Zv9_00038403 Zv9_00038405 Zv9_00038404	74.4753	31.5258	12.2243	7.08479	16.4237	16.4442	13.0244	7.62411		pi.1[5338]	0.5092	0.1438	0.00232	0.1957	0.5219	0.7524	3001	5000		beta.i[5338]	0.002965	0.03218	0.0005976	-0.0594	0.002561	0.06598	3001	5000
Zv9_00050222 Zv9_00050225 Zv9_00050231 Zv9_00050224 Zv9_00050221 Zv9_00050223 Zv9_00050230 Zv9_00050219	566.82	203.205	1	581.546	245.066	5.49689	5.9129	9.80622		pi.1[7003]	0.4318	0.1145	0.001472	0.1957	0.438	0.6378	3001	5000		beta.i[7003]	0.004138	0.03126	0.0009469	-0.05692	0.004016	0.06527	3001	5000
Zv9_00016396 Zv9_00016397	7.0253	4.36367	2.03028	3.63726	4.66312	19.4672	27.5146	33.7424		pi.1[2283]	0.6628	0.1944	0.003674	0.1958	0.6975	0.9308	3001	5000		beta.i[2283]	0.002408	0.03092	0.0004972	-0.05857	0.002802	0.06266	3001	5000
Zv9_00039429 Zv9_00039428 Zv9_00039426 Zv9_00039427	10.3202	29.0848	21.0408	19.0138	6.02377	5.19939	2.57005	1.96265		pi.1[5480]	0.6045	0.1764	0.003094	0.1958	0.6284	0.8822	3001	5000		beta.i[5480]	0.002221	0.03132	0.0004529	-0.06058	0.002285	0.06335	3001	5000
Zv9_00023804	29.2838	6.10191	7.70905	4.18575	11.692	24.058	17.7058	36.2829		pi.1[3306]	0.5554	0.1632	0.002857	0.196	0.5754	0.8156	3001	5000		beta.i[3306]	0.002875	0.03217	0.000482	-0.05992	0.003364	0.06438	3001	5000
[truncated: 3,671 more rows]
